# Supplementary material for: Molecular Homology and Difference between Spontaneous Canine Mammary Cancer and Human Breast Cancer
Source: Oxford University Press journal article supplement (doi:10.1158/0008-5472.can-14-0392), 2014-08-01
Supplement: 00085472can140392-sup-126768_1_supp_2522429_n7llgl.xlsx [file 00085472can140392-sup-126768_1_supp_2522429_n7llgl.xlsx]

## Sheet: Table S4A-CC+SC-FDR0.2
Table S4A (related to Figure 3): Differentially expressed genes between complex and simple carcinomas at FDR ≤ 0.2
By conducting t-tests* with ln(FPKM) of RNA-seq data shown in Table S3H
	Complex Carcinomas					Simple Carcinomas												Normal Glands
Gene	T401130	T402421	T403802	T518		T115	T159	T341400	T401188	T406434	T5	T76		t-value	p-value	q-value		N31005	N32510
A2M	93.3565	43.3152	86.4793	39.716		9.44162	8.73389	7.58734	14.1127	3.08127	14.7697	6.49233		6.65407	0.000234009	0.000699351		28.6002	21.9676
ACP5	29.4452	60.6133	39.6892	102.035		7.28898	6.64997	18.1997	15.1669	11.7471	13.1059	3.23835		4.83915	0.00190324	0.00322558		58.8643	25.5383
ACTR5	6.47107	5.69405	4.76436	7.51135		6.31848	8.35088	12.8027	11.5656	8.84736	9.22659	15.7		-3.38243	0.00845654	0.00900592		10.0754	13.8858
ADAMTSL5	4.51063	4.45766	5.18044	3.22571		1.82044	1.97944	4.21496	2.54589	0.759882	2.028	1.86423		3.59449	0.00642865	0.00762149		2.42527	1.3671
ADNP	87.4119	73.4115	70.563	77.3891		141.939	126.441	194.591	143.229	143.713	147.833	140.479		-9.46942	9.32517e-06	5.70899e-05		110.214	134.515
ADNP2	29.3079	27.3695	23.5378	25.6947		40.387	46.2259	53.551	47.2099	43.7075	42.4988	35.7942		-7.59179	5.72725e-05	0.000228359		34.0254	42.8287
AGPAT1	30.5583	27.2377	30.4057	39.2049		56.1053	44.483	55.8739	49.3332	48.0866	43.6022	71.2631		-4.97145	0.00163915	0.00289731		62.595	120.944
AGPAT9	14.8768	29.0928	12.9026	12.0952		8.3263	6.93526	6.7783	8.63089	3.37243	7.83332	3.72265		3.86891	0.00788184	0.00852066		16.1931	36.157
AGTRAP	94.312	136.541	112.484	61.1504		22.7735	56.6668	20.9667	71.2396	28.0362	25.7986	50.9024		3.96612	0.00373798	0.0053379		57.829	69.0271
AHNAK	50.2127	40.0488	54.4653	50.3464		14.4043	25.7617	30.4044	46.4256	11.3007	25.3283	16.9885		4.05398	0.00427659	0.00570898		29.4812	51.7449
AHSA1	96.5887	81.1536	89.8868	74.4182		125.381	141.676	117.279	95.9861	217.959	116.138	102.528		-3.37602	0.00867203	0.00926283		79.5742	78.521
ALDH3A2	100.605	90.5461	113.073	102.842		65.2379	61.4195	40.4081	67.9982	58.1397	66.1353	66.192		6.35289	0.000134621	0.000442446		97.2755	120.086
ALKBH4	44.6765	45.4303	40.3801	44.1018		51.5889	79.1027	62.2176	55.5829	76.2168	54.4071	49.6493		-4.3122	0.00299538	0.00445301		50.0843	45.0336
AMDHD1	79.8892	69.3978	64.3251	46.3644		18.1341	49.2334	21.9902	38.2275	7.93423	17.5178	25.8624		4.17835	0.00275846	0.00405338		47.4778	20.8431
ANAPC7	27.9888	26.7543	23.2904	28.4086		33.3223	35.4326	37.7826	38.3475	45.3581	30.9877	31.2397		-4.39827	0.00195738	0.00328267		28.1811	26.5541
ANKRD13D	59.2877	66.4627	72.5356	58.1544		27.6343	37.6125	24.9644	53.5816	53.6326	22.9799	48.7677		3.7926	0.00598943	0.00723614		33.7175	65.5287
ANKRD17	37.6732	36.7057	29.0284	36.7638		63.0242	54.2081	48.8879	59.7997	131.577	67.6208	84.6891		-4.89184	0.00110177	0.00206951		44.2906	63.7411
ANKRD46	50.8244	58.3737	54.4476	52.7312		121.696	133.523	63.7972	80.5723	256.83	115.703	132.441		-4.65885	0.00297077	0.00439592		67.0022	86.3224
ANP32E	46.4339	45.5476	43.0584	52.0419		74.0924	65.8764	89.6352	64.8496	96.8176	60.3243	109.048		-5.47426	0.000565535	0.00127025		57.0252	56.1697
ANXA7	69.8344	81.0775	71.9458	58.5211		39.6425	69.3646	44.0587	51.4328	46.4565	41.2452	51.2278		3.77482	0.00510299	0.00650824		48.7209	38.3872
AP1AR	15.7512	11.6496	11.6331	12.7891		18.1797	16.1063	20.6192	21.5665	16.2077	14.9652	18.7731		-3.78301	0.00890015	0.00941982		17.5063	19.9859
AP2A2	73.7805	70.8242	63.8071	75.1003		51.1303	50.5781	54.4555	69.7657	41.5085	53.4	63.743		3.6139	0.00593213	0.00717905		87.7072	77.8332
APBA3	22.0748	18.0388	21.314	18.1395		35.0972	27.2609	30.0645	28.9454	26.6691	24.5984	20.3035		-3.81157	0.00430671	0.00573753		19.3495	23.4643
ARAF	57.3371	61.2082	56.0183	56.5202		100.753	81.1991	80.66	60.346	99.2549	82.2793	64.2696		-4.26323	0.00392676	0.00550917		49.6113	56.3582
ARF3	216.013	224.89	212.147	139.282		160.314	114.58	92.4586	164.386	91.4131	117.936	100.003		3.50317	0.0103067	0.0104332		196.678	153.907
ARHGAP29	24.0772	19.0031	16.0949	22.1026		52.0826	32.6295	30.7727	30.0133	37.2243	67.4197	20.3376		-3.39506	0.00819425	0.00877756		28.9844	46.2886
ARHGAP39	15.6653	11.7933	18.1611	15.972		30.7866	18.2652	18.88	21.7139	38.9272	25.5891	28.2466		-3.66212	0.00563946	0.00679369		15.6959	12.8898
ARID1B	26.8	28.4753	20.5333	28.3017		39.8725	40.8512	37.9214	48.816	44.899	42.7371	29.6541		-4.54977	0.00319496	0.00469564		38.566	54.2231
ARL15	18.4656	9.13947	14.8105	13.6199		32.4227	28.831	16.5681	50.9103	27.1685	28.5363	18.3505		-3.42838	0.00940093	0.00976236		22.442	18.8489
ARMC7	7.4262	11.2354	10.1858	12.5106		17.0937	21.9785	21.8968	15.26	20.0039	24.6453	20.3029		-5.26903	0.00359214	0.00520945		15.7608	9.82037
ASF1A	17.4119	19.6339	18.7897	16.349		32.0199	24.04	32.767	24.8726	47.7415	23.2307	23.1317		-4.27616	0.00296593	0.00438165		24.9946	23.7607
ASXL1	57.3585	56.9547	39.8431	48.6502		79.9273	76.1769	152.721	85.2286	84.3278	79.8355	85.9325		-4.63836	0.00152243	0.00281168		98.9259	84.5303
ATAD2	13.951	9.51751	6.63233	27.5798		64.4631	42.5323	32.7614	22.2183	132.399	59.9013	193.296		-3.7779	0.00583041	0.00707914		28.0459	26.0113
ATF5	12.4581	10.5321	17.3978	9.3212		24.0162	18.6788	39.6698	29.3061	18.2119	17.5748	20.8098		-3.66627	0.00809096	0.0087062		22.994	14.8061
ATF6B	98.2889	81.3694	75.3947	75.0463		137.227	125.846	120.98	103.753	109.901	106.277	137.07		-4.88513	0.00284108	0.0041961		86.4103	90.7824
ATP13A1	28.7438	33.1196	33.6309	32.9172		57.2117	50.1405	52.0443	42.7555	59.7977	54.4143	37.6099		-6.14311	0.000191311	0.000585171		33.0343	34.1675
ATP2B1	51.4283	91.588	54.838	70.5332		15.9319	31.0673	26.7184	46.7403	39.9962	26.2414	35.0279		4.13949	0.00322856	0.00473846		24.0838	20.0263
ATP9B	13.9777	13.2597	10.9589	11.3076		21.8829	16.6917	18.4251	19.6307	17.0681	22.3058	19.1931		-6.09838	0.00086532	0.00158424		19.0375	22.3982
ATPAF2	13.4448	14.1471	22.008	11.6356		5.62145	7.26857	8.02408	12.6561	9.31152	5.15875	6.41143		3.82393	0.00639942	0.00759295		14.7308	8.30788
ATXN2L	55.8404	47.3097	37.6615	44.3607		62.3592	75.1315	81.0101	67.0578	72.0987	55.1159	54.8635		-3.6907	0.0103601	0.0104617		68.1118	69.2877
ATXN7L3	16.8889	19.5712	13.5985	15.5929		20.2413	20.0593	31.8045	25.7782	38.0537	21.6064	36.7653		-3.86356	0.00383026	0.00540926		18.9959	20.7258
AUP1	93.5867	113.176	101.723	90.5082		152.402	200.718	164.486	97.55	157.388	131.057	146.686		-4.00787	0.00322683	0.00472418		73.1771	83.6425
B4GALT7	75.3472	79.6215	89.8524	65.6541		54.8098	49.3164	49.9563	55.4562	41.5531	50.2835	67.6049		4.54617	0.00252901	0.00383929		69.3153	59.7949
BAG6	99.9377	101.416	106.545	97.0194		106.002	122.466	143.093	125.508	130.101	101.352	152.261		-3.5374	0.00877998	0.00934846		111.526	110.169
BAP1	51.4223	41.0227	49.8868	41.9964		59.4899	60.7379	63.8495	57.4271	72.3517	63.3872	56.523		-4.51813	0.00687237	0.00789267		57.7015	51.9743
BCL11A	45.136	29.3752	32.9948	43.689		57.053	91.733	52.759	115.3	54.1331	45.1526	63.491		-3.39509	0.00823362	0.00880611		114.257	95.3166
BCL3	102.069	72.5103	95.015	92.3302		58.9483	77.991	34.0176	62.2295	57.8399	57.8223	52.0179		3.93641	0.00348708	0.00505245		35.7574	18.4632
BCL7A	8.75576	7.98142	5.51984	7.10644		11.7922	11.1986	12.9359	11.7379	13.0608	13.2987	8.00235		-3.92353	0.00868933	0.0092771		5.81745	14.2971
BCL7B	12.1484	14.9422	15.7302	15.0159		17.6506	27.7083	19.825	22.8257	20.8624	20.2998	22.4327		-5.09659	0.00110872	0.00211232		14.0359	11.4858
BCORL1	5.67644	5.7928	4.47534	5.94937		10.8056	8.72452	13.4815	7.85771	10.038	10.8352	9.01513		-6.44938	0.000187315	0.000542354		7.82591	6.3102
BECN1	83.7666	72.4818	75.7835	66.0288		107.064	98.5837	94.8313	87.8405	114.164	96.0228	98.1393		-4.91362	0.00326267	0.00482409		71.6024	54.0685
BIRC6	13.4232	15.0508	11.7956	18.1662		25.9984	18.5039	23.7715	29.1901	24.3618	29.1264	30.0028		-5.11383	0.00225103	0.00365375		18.0248	28.4402
BRD3	57.8579	51.4709	59.2898	75.593		93.0766	95.3087	116.78	90.0742	128.093	89.7073	121.88		-5.43056	0.00149348	0.0027974		84.8947	105.319
BRD4	59.0654	61.4301	60.1053	74.4753		80.4104	89.2527	82.2859	79.4872	89.7956	86.0724	81.1927		-4.89933	0.00935104	0.00973382		67.5052	98.0027
BRI3BP	18.4674	15.2599	14.3321	31.6058		44.3157	37.892	33.0611	47.2715	73.6971	43.8979	56.2329		-4.39877	0.00744776	0.00833512		20.3444	49.702
BST1	41.2775	24.2731	25.5798	31.6542		10.6144	10.2207	12.6796	7.42952	19.8975	7.37698	10.6415		5.86766	0.000327436	0.000856348		6.64941	5.24212
BTBD19	7.92585	6.27394	8.8674	7.22824		5.86094	4.68363	3.32285	3.90791	5.45615	4.29209	4.44395		4.97447	0.00109812	0.00205523		7.91392	1.91775
BTF3L4	31.3949	27.68	39.591	30.8629		17.7018	18.0928	21.1665	31.6503	20.0111	13.6364	22.5131		3.80686	0.0042283	0.00568044		35.5271	35.2864
C10orf137	6.41402	7.21998	7.5177	5.32394		7.57172	10.3088	17.1793	14.0592	12.2166	8.40323	8.67033		-3.60913	0.00567698	0.00685078		11.6126	17.2561
C11orf54	17.78	16.9986	18.0703	18.7224		6.86357	8.4704	11.4435	20.1994	11.4555	7.44551	11.1802		3.93572	0.0070564	0.00799258		21.7877	38.2372
C14orf102	8.97908	7.57452	8.50665	9.55637		12.2309	13.1537	11.2634	12.2825	11.8275	14.8984	11.7768		-6.06283	0.000900931	0.00165561		12.0917	14.9514
C15orf38	94.0426	72.5288	72.0566	76.2062		46.0347	54.8185	61.4586	70.7377	57.6094	54.1814	55.4794		4.01844	0.00568534	0.00686505		111.986	81.2606
C15orf38-AP3S2	7.87949	7.67381	5.48784	5.48735		3.78242	3.42187	3.045	5.0434	2.55542	3.22335	1.84708		4.69939	0.00122353	0.00242632		2.44656	3.64102
C17orf42	13.375	11.8726	16.8229	13.8209		31.2484	22.0181	22.0255	17.4449	31.6703	20.1584	23.3326		-4.78043	0.0011231	0.00219796		13.8669	15.0534
C17orf61	124.17	90.3443	142.002	95.8567		51.7073	77.6253	59.4221	115.222	41.5661	48.3094	77.0176		3.27692	0.00980095	0.0100906		107.512	103.932
C17orf75	11.7133	11.32	9.71971	12.126		16.5196	17.6327	23.1399	13.1876	18.0233	17.9627	15.3288		-5.27792	0.00051353	0.00117034		14.252	13.9177
C17orf85	15.7215	13.5967	10.8494	13.1022		21.682	20.39	24.2183	26.0489	20.2995	18.1362	29.5323		-5.4266	0.00101921	0.00186969		24.7586	29.0811
C19orf47	8.53015	6.01631	8.89158	8.971		12.8272	19.8811	20.0975	14.237	18.8589	14.1334	10.7008		-4.94831	0.00121012	0.0023835		12.4321	14.6484
C1orf124	14.9862	16.0214	15.7107	14.3097		21.8028	25.0297	18.0347	18.0062	17.0761	21.8019	17.111		-4.09936	0.00343779	0.00502391		21.0051	16.4515
C1orf135	2.74927	2.59748	2.9939	3.49917		6.0231	9.60318	4.87986	3.74635	15.641	4.78585	5.78799		-4.0159	0.00458997	0.00598016		7.76467	4.43875
C1orf96	5.29868	4.21117	5.11865	5.29061		6.11294	16.0952	7.8763	10.5456	10.6057	6.39355	9.08688		-4.3703	0.00244253	0.00381075		9.18702	4.47459
C20orf11	33.2525	39.6282	36.4477	32.5736		61.026	46.4458	53.2476	44.8879	51.4594	43.1731	62.7006		-5.22024	0.0005832	0.00128452		49.23	59.8545
C20orf112	13.9305	13.9814	10.4171	11.1979		28.8629	21.0846	42.537	35.1893	41.2811	30.1049	34.4429		-8.26634	1.98237e-05	9.99072e-05		26.9086	27.5918
C20orf194	3.62738	3.8314	3.19129	4.46063		8.33481	5.93041	13.476	6.2251	7.50823	11.1557	3.41069		-3.67257	0.00667776	0.00774995		3.89897	5.87137
C20orf27	43.7655	44.8885	66.2752	53.5463		92.5846	98.0192	179.429	65.734	157.993	86.9456	93.6527		-4.33928	0.00188109	0.00318276		42.696	56.6269
C20orf4	29.1784	22.4947	21.9066	23.052		47.3701	35.7121	49.6373	34.6105	46.424	44.3624	47.859		-6.84901	0.000243145	0.000713623		36.8152	36.413
C20orf54	17.1433	103.412	26.8694	18.7855		0.256445	3.85577	2.12384	6.8328	12.3354	0.406412	2.0275		4.00755	0.00312804	0.00463855		0.183391	0.453351
C2orf56	8.60978	6.89043	6.53012	10.1622		14.2068	12.3559	14.3109	9.26386	19.5415	15.571	22.734		-4.16958	0.00280429	0.00411047		9.4458	8.09678
C3orf75	8.43296	7.24079	7.91803	7.51739		17.0233	16.8581	11.4803	10.6821	19.785	14.2896	10.1829		-5.62552	0.000703253	0.00147006		7.01331	6.96733
C4orf14	14.2692	9.77227	15.0695	16.9414		25.0129	33.5616	13.6642	26.055	56.0735	22.6497	36.4056		-3.49936	0.00673166	0.00782131		17.7939	16.4129
C4orf21	1.59822	0.977754	1.18105	1.79478		2.67247	2.67024	7.83143	2.02306	2.83181	2.78137	2.6951		-3.78763	0.00456156	0.00595162		2.08703	1.94828
C4orf41	34.0994	31.6533	32.3895	40.7382		17.8163	21.799	18.7772	31.6542	26.5897	20.7109	21.8751		4.599	0.00130627	0.0025405		40.0893	41.313
C5orf22	15.7649	9.86623	10.572	15.0572		20.7557	22.0177	28.1717	23.7996	40.899	25.5196	26.6708		-5.03191	0.00241199	0.00375366		18.8929	26.2934
C5orf25	5.71448	5.84886	7.02374	7.43846		12.3711	12.0889	16.3368	9.75708	17.6991	10.2357	5.59828		-3.54714	0.00745993	0.00834939		6.3986	5.45959
C6orf35	19.9132	16.5163	16.3921	24.526		41.8026	35.4451	24.1966	24.7385	30.0753	34.4109	28.0055		-3.91407	0.00637824	0.0075644		21.7374	29.0793
C7orf42	149.042	157.836	118.02	156.177		198.495	296.437	184.728	176.556	216.332	214.516	176.181		-3.67437	0.00621812	0.00745023		145.434	187.54
C8orf33	30.5352	16.9467	29.046	22.9606		45.094	40.6945	50.5684	35.4918	88.5558	38.1865	92.9529		-3.79581	0.00469902	0.00608007		46.3807	39.4648
C9orf86	69.8842	70.9637	66.2228	64.4203		89.466	89.9175	95.5184	80.34	113.865	78.8577	149.483		-4.10812	0.00479534	0.00623707		93.1721	85.1453
CABLES2	10.1728	8.2787	7.6559	11.0894		18.3955	18.0897	31.6832	10.0851	20.2034	17.6619	18.7741		-4.53269	0.00142353	0.00268322		10.7708	9.70262
CAD	21.8103	20.1819	18.3958	22.8391		23.3999	30.5178	25.7456	31.2387	31.1515	23.5346	26.8855		-4.0721	0.00349418	0.005081		15.9749	31.0554
CALM3	86.0513	92.181	92.9227	116.159		120.363	100.407	153.556	138.151	151.166	124.366	155.691		-3.65717	0.00696192	0.00796403		259.397	204.95
CAPN10	20.9328	14.5027	14.6227	16.4294		24.3977	27.3346	35.0099	22.2149	33.7491	17.441	28.0456		-3.73321	0.00534748	0.00667951		16.3914	14.3266
CARHSP1	70.2766	108.165	50.1963	52.2699		17.168	13.9812	54.9774	18.7351	31.1089	19.6942	6.5679		4.06515	0.00282026	0.00416756		60.2715	58.4573
CBFA2T2	8.51905	10.7293	7.89836	11.7179		14.203	14.0535	26.867	13.3791	19.8683	17.2392	19.782		-4.48205	0.00199181	0.00329694		14.185	13.3405
CBX1	34.8382	20.5121	34.5856	38.5136		50.6341	53.5424	109.883	59.5813	84.1845	52.6482	72.7508		-4.20419	0.00478377	0.00620852		66.6332	50.0464
CCAR1	29.1893	28.0785	24.3666	26.9421		29.633	39.4168	52.7959	44.7145	45.8337	30.8417	49.2029		-4.40316	0.00223871	0.00363948		37.0697	28.9572
CCDC11	3.14503	2.26409	2.35522	2.66108		4.78714	8.24206	4.60447	4.67312	4.74159	3.83104	2.54263		-3.72171	0.00508987	0.00649397		5.38795	4.41387
CCDC117	12.536	13.88	8.22964	13.2384		15.898	42.341	23.6814	23.5366	33.8676	22.5015	30.1896		-4.73599	0.00145985	0.00274031		19.9069	31.1414
CCDC120	13.7199	11.686	14.1869	10.8423		23.8532	23.5033	15.9836	21.7803	14.654	20.5269	15.3299		-4.08458	0.00283874	0.00418183		18.4966	22.0087
CCDC127	10.4188	11.439	9.38802	11.5448		16.6775	19.672	17.2883	17.1048	30.5549	25.2603	31.286		-6.20146	0.000247274	0.000727895		14.4262	11.9072
CCDC142	2.43512	1.82406	1.93503	3.25043		4.02756	5.38704	7.56622	7.41388	5.06103	4.66644	5.60297		-5.58082	0.00166181	0.00294013		3.31139	3.70026
CCDC51	19.8503	17.1932	23.4648	17.3316		35.1741	32.3723	29.5221	21.0314	30.79	23.4358	26.2984		-3.68547	0.00656126	0.00767858		16.9505	13.122
CCDC6	31.7618	27.3919	27.7257	29.0278		37.17	37.5673	44.9745	69.3911	44.6612	38.2298	44.904		-4.81278	0.00145853	0.00272604		41.857	64.311
CCDC80	252.144	248.695	157.463	129.034		56.7455	83.7113	65.6042	12.4834	7.56859	122.091	20.6363		3.86152	0.00499931	0.00642261		268.345	136.672
CCM2	22.8956	20.2692	23.5541	25.8937		12.6428	16.5271	20.9241	20.2937	12.8219	15.6169	14.1556		4.07363	0.00281268	0.00413901		21.3602	15.0456
CCNK	24.209	22.4699	21.3276	26.4187		33.5011	27.8069	30.8518	28.4945	27.7839	26.8662	31.2878		-4.02819	0.00799573	0.00866338		36.3586	33.9906
CCNT2	20.0496	21.0658	15.9987	17.0033		31.5202	22.4322	57.0873	41.5234	37.561	28.7897	20.5142		-3.76417	0.00521446	0.00655106		28.3866	39.8871
CCT8	172.137	161.077	179.064	195.114		251.894	326.322	205.231	214.873	322.696	225.155	355.289		-4.34187	0.00237221	0.00373939		173.578	210.349
CD151	440.775	539.682	603.434	390.699		285.216	237.325	237.298	267.509	159.188	232.163	507.95		3.81694	0.00412667	0.00563762		221.864	201.08
CD3EAP	9.24732	7.04627	8.71853	11.6638		13.0607	15.2789	15.1171	16.5922	17.9399	12.9844	21.346		-4.5614	0.00472243	0.00610861		9.13608	10.3279
CD55	23.8779	29.6995	15.7227	25.1875		2.37209	11.6525	5.38962	13.3501	6.20754	2.87337	1.61579		4.73376	0.00147833	0.00276886		40.6145	11.4772
CD81	986.325	1138.88	1213.27	885.682		663.95	560.377	708.492	584.245	640.721	556.269	733.78		6.12906	0.00148027	0.00278313		878.499	836.486
CDAN1	5.68551	4.13932	4.6203	4.80949		8.9763	6.79758	7.24414	9.31756	5.42949	7.72548	5.65876		-3.94871	0.0035426	0.00515236		8.05559	6.80147
CDC23	6.38497	7.31658	5.71716	6.88227		7.13506	10.5928	8.5712	7.08301	8.22622	8.35649	10.1979		-3.28869	0.0101397	0.0103333		7.52793	9.86412
CDIPT	49.4999	50.0007	46.6848	40.6915		71.4804	76.3046	59.5519	48.129	92.8766	59.1956	52.9658		-3.29108	0.00993699	0.0102191		51.8697	61.7387
CDK6	5.75384	7.37784	4.59471	16.8184		23.3615	22.9363	17.7407	13.8398	28.3105	40.1186	129.863		-3.42847	0.00915408	0.00960537		6.22578	15.218
CDS2	13.6151	16.0895	12.291	16.9754		20.1623	22.457	38.8703	16.0226	32.7123	29.6448	36.3997		-4.15981	0.00257361	0.00389638		17.204	30.3937
CEBPZ	49.7067	41.5995	51.5262	41.4381		57.2044	56.8455	60.1457	65.6858	69.9654	54.0613	70.1995		-4.24318	0.00564652	0.00680796		45.1435	66.1396
CEP135	4.05626	3.35389	1.73547	3.5729		8.69024	7.73589	4.91776	4.62167	15.0423	8.54636	9.11366		-3.90297	0.00645545	0.00765004		3.99061	6.22451
CEP78	5.75687	5.03464	6.44877	5.13968		7.87297	10.929	15.2137	10.8111	20.7559	6.45467	9.4498		-4.20301	0.00336902	0.00498109		23.5623	33.7628
CERS2	72.0763	77.8195	66.3281	67.5345		140.024	98.4103	91.439	85.8738	114.009	111.663	117.785		-5.6933	0.00033491	0.00087062		66.1751	61.739
CGREF1	19.7006	14.5045	19.4485	18.3771		5.93341	8.37549	16.2793	3.16543	7.61491	13.891	5.80854		3.80958	0.00617819	0.00739314		15.6841	8.52172
CHCHD3	75.7594	77.2439	77.5604	96.6389		105.777	102.488	112.846	110.509	158.667	92.7803	188.005		-3.4931	0.0070569	0.00800685		84.9276	88.3258
CHD6	10.8919	11.4172	8.54703	11.0021		24.5957	23.4126	23.3667	21.0342	17.5758	28.1341	14.1367		-6.53454	0.000109176	0.000371084		17.4994	19.1435
CHERP	24.1454	21.5743	24.0806	24.783		35.1177	34.2384	33.509	34.9759	36.951	33.2091	25.3677		-6.07776	0.000186905	0.000528081		31.2567	29.0323
CHPF2	75.5741	96.4527	64.4769	58.3547		37.5758	29.2401	38.4735	73.4009	35.8235	51.0832	33.4045		3.57054	0.0068323	0.0078784		54.5501	51.6747
CHST1	17.365	13.9586	28.8577	18.8099		3.75905	5.45186	5.68933	3.83617	8.95387	11.2465	3.74499		5.43268	0.000515642	0.00118461		8.76978	8.24837
CHST9	1.90314	1.52985	1.7049	2.74934		9.53438	5.55143	30.2528	2.18036	20.4957	8.30243	25.5224		-4.52897	0.00234996	0.00371084		0.173619	3.00035
CIB1	90.7318	92.1466	119.283	99.2851		53.855	60.9217	62.4648	54.6622	55.16	50.7778	68.2243		7.4068	0.00052656	0.00119889		64.156	47.1048
CIC	41.0432	46.9872	38.7333	44.0637		49.1585	61.3873	66.2957	53.2548	61.259	58.4898	52.8865		-5.11989	0.00102834	0.00188397		41.6639	38.2325
CMPK2	11.8386	18.9899	29.4412	22.0666		61.6802	58.1762	31.8285	27.138	36.7675	65.2543	114.371		-3.55026	0.00758369	0.00839221		8.70073	4.77068
CNOT8	26.8627	34.5856	28.3521	28.479		38.5998	50.2391	59.386	59.751	80.277	45.5121	44.8906		-5.43441	0.000442701	0.000999072		61.8123	72.1717
COIL	17.8603	15.3529	16.5427	12.7693		20.1651	22.2184	24.2928	20.5537	26.9659	20.2469	20.5397		-4.19877	0.00803219	0.00867766		20.8339	23.2189
COL20A1	0.051477	0.127102	0.0536015	0.0600507		1e-06	1e-06	0.0359581	1e-06	1e-06	1e-06	1e-06		6.35916	0.000608342	0.00135588		0.061412	0.191135
COL5A2	216.989	131.321	243.374	414.039		37.0431	78.3244	34.1358	45.9453	94.798	155.236	29.7826		4.2209	0.00296193	0.00436737		222.183	64.6028
COL5A3	5.95847	5.28002	8.88495	12.4729		1.58881	2.87711	7.11376	2.46891	3.88421	2.93605	0.781207		3.36022	0.00842008	0.00897738		19.5416	10.1487
COL8A2	106.061	91.417	207.331	211.75		86.3868	34.5385	28.1039	25.9816	26.779	118.12	47.584		3.70494	0.00571696	0.00695069		39.8577	40.5043
COMMD8	20.1493	16.0763	15.738	28.615		36.9956	40.1593	21.7377	33.0359	85.2659	38.2907	56.8889		-3.47883	0.00733197	0.00817812		18.653	17.426
COQ4	17.7222	16.5695	21.9506	15.5027		31.1893	16.8731	30.0021	23.5096	35.4007	27.946	32.7912		-3.60361	0.00582776	0.00706487		19.0436	23.9102
CPSF1	48.7828	41.859	47.484	46.0046		86.1049	86.6817	67.2408	75.3606	205.395	75.6555	94.8217		-4.80233	0.00225728	0.00366802		56.5227	59.4828
CPSF3	30.9994	23.1364	23.0009	29.6932		37.394	43.3152	29.647	34.695	42.3126	34.4018	47.1338		-3.61495	0.00991859	0.0102048		28.6765	30.1982
CRADD	24.0201	32.0981	17.3216	15.3297		8.03672	8.66391	7.07896	13.5415	3.9843	9.88202	15.856		3.68293	0.00601494	0.00725041		23.5293	27.1887
CREB3L1	31.9856	67.6019	41.3259	13.0118		3.24433	3.89286	5.76716	3.93691	0.994536	15.4721	4.6544		4.48494	0.00254256	0.00385357		28.8668	32.8769
CREBBP	25.4746	22.8316	24.3219	24.0465		36.7824	33.2971	42.8434	36.888	36.0195	36.8274	27.6147		-6.97027	0.000116603	0.000399629		38.9733	41.7648
CRIM1	59.1704	74.5244	54.1807	60.4277		116.614	61.9651	180.729	140.73	93.7745	111.519	106.636		-4.10283	0.00298297	0.00443874		65.0794	103.601
CRLS1	39.236	19.9613	29.5067	25.4189		83.69	67.0623	67.4781	45.6884	75.0949	61.3391	48.9294		-5.00932	0.00383385	0.00542354		45.5996	61.7521
CRNKL1	41.2984	32.069	35.2125	32.6283		60.0323	48.6039	64.3226	38.042	39.9147	61.2623	45.1012		-3.56517	0.0060705	0.00732177		50.9492	43.0572
CSDE1	375.65	337.748	313.294	382.534		440.352	460.002	447.664	429.851	513.201	417.992	546.049		-4.63077	0.00277824	0.00406765		422.961	564.411
CSE1L	41.6906	35.6483	38.1722	52.7891		67.6245	66.4811	88.5314	58.4917	105.984	64.7683	77.354		-4.9928	0.00130005	0.00252623		47.8462	51.0891
CSNK1D	131.315	137.677	124.55	130.182		146.529	156.166	154.334	180.179	132.074	151.435	179.218		-3.8352	0.00465168	0.00605152		133.284	163.786
CSNK2A1	53.6045	63.9494	45.5543	57.5462		67.2516	66.9783	92.2889	72.176	102.291	75.543	91.4128		-3.96537	0.00481171	0.00626561		73.1371	94.7493
CSPG4	17.6463	28.6619	62.7461	104.546		2.41523	5.27696	9.64315	12.0939	4.38803	6.66573	5.81149		4.45077	0.00831404	0.00887747		15.9101	9.63272
CSRP2BP	39.2752	31.0464	33.7083	34.1775		52.7177	49.8883	65.8939	36.9827	53.114	53.5317	46.7637		-4.70958	0.00111142	0.0021266		48.5707	56.2855
CSTF1	36.9014	30.621	39.8777	27.8722		62.8813	46.5155	63.4852	43.5726	61.8586	56.8901	37.6086		-3.9056	0.00477538	0.00619425		51.3463	39.8518
CTDNEP1	90.9534	82.306	87.082	71.043		61.1231	50.0226	52.6583	68.9773	42.8851	58.4488	84.4237		3.44443	0.00742422	0.0082923		81.5373	58.9761
CTDP1	29.1555	24.2158	28.6892	28.108		34.7321	39.1154	40.7424	32.3631	38.2588	33.1832	27.0262		-3.45602	0.00737103	0.00826375		26.7125	33.4745
CUEDC1	30.8995	29.4247	25.8282	33.6226		60.7726	46.3847	38.9586	47.817	43.466	58.777	74.4691		-5.44921	0.000414969	0.0009848		33.0912	84.7352
CXCL10	3.07452	0.839227	0.891834	1.48579		11.6494	8.06432	58.9067	5.9794	14.8898	18.1662	4.33526		-4.94658	0.000981412	0.00175551		24.9032	18.1114
CYP3A4	0.118383	0.556549	1.22561	0.39107		1e-06	1e-06	1e-06	0.0924061	0.00038363	1e-06	0.0323816		4.41737	0.00343759	0.00500963		0.3266	1e-06
CYTIP	49.3062	50.5304	47.8543	40.8287		12.1658	17.4988	8.21579	15.0225	6.29043	24.606	31.3403		5.34624	0.00130808	0.00255477		38.85	54.6027
D2HGDH	23.0429	31.8648	26.0674	23.1973		10.0888	20.1875	16.2896	18.7149	16.7638	11.4187	24.9153		3.2771	0.00970616	0.0100621		13.8521	4.34918
DAGLB	22.6321	20.6298	22.0132	17.9147		29.2073	30.1598	21.9694	25.4688	29.9364	29.1369	22.2915		-3.40699	0.00917804	0.00963391		21.9598	18.5246
DAPK1	32.1796	29.1822	17.3571	27.8176		50.2429	45.3872	61.2072	65.4427	40.0148	50.1548	35.293		-3.91872	0.0102339	0.0103618		56.0256	101.697
DBF4B	1.10731	1.02578	1.28808	1.76978		3.78076	3.01372	5.24159	2.00442	2.39711	4.08588	3.21176		-5.44545	0.000586078	0.00129879		5.14229	1.37661
DCAF7	63.429	52.5677	51.0259	48.0155		69.9457	63.5165	82.0557	75.8977	100.522	68.3456	78.3395		-4.28703	0.00291641	0.00428174		72.6528	69.5949
DCAKD	15.973	15.178	27.2116	17.602		43.6807	37.7574	44.6162	37.2728	64.8847	37.3228	23.9097		-4.41467	0.00306798	0.00455292		25.2767	29.637
DCLRE1B	24.3381	19.0407	17.7887	32.6293		54.7659	41.6259	44.0887	33.8425	70.3058	40.3757	77.4426		-4.34044	0.00339031	0.00499536		30.5107	38.6191
DCP2	2.85831	2.82997	2.488	2.99261		4.25571	5.38728	4.52807	4.03382	4.71881	4.8787	11.3999		-4.53525	0.00269522	0.00399629		3.00836	6.27925
DCTN6	47.9223	53.897	43.0687	47.6507		29.6755	35.993	37.9055	42.2546	36.2904	31.9452	17.8376		3.4384	0.00906903	0.00956255		50.7056	46.7451
DCUN1D4	13.7756	13.0989	8.77545	15.4951		21.1101	36.0407	26.514	23.126	86.5085	21.8008	35.0363		-4.11803	0.00262828	0.0039392		12.2238	19.3562
DDX27	36.4022	28.2175	32.3141	39.7864		59.8991	50.7979	74.7602	45.0014	65.6958	52.1042	67.3958		-5.4046	0.00079325	0.00152715		35.2773	52.496
DDX39B	169.72	134.582	165.853	144.954		278.317	257.061	333.497	233.114	290.682	200.12	204.726		-5.5844	0.000351921	0.000913437		232.934	208.249
DDX42	58.2999	46.1919	50.1325	53.5017		72.0373	62.5339	92.3601	72.7476	76.3365	69.4445	71.7424		-5.22749	0.00100137	0.00178406		66.6581	77.2647
DDX49	21.5701	19.7833	22.4706	24.1821		29.3082	29.762	29.7079	21.2748	36.1974	26.4752	27.2458		-3.43619	0.00743993	0.00832085		18.8948	27.949
DENND1A	15.4224	20.8922	14.7856	16.3048		33.4324	25.3274	20.8568	19.5868	23.277	32.4064	20.0025		-3.34143	0.00952862	0.00989082		18.4706	16.2882
DENND5A	40.1099	49.5029	41.9342	35.7425		32.5994	29.3379	30.2713	23.8584	19.5877	42.2172	25.9735		3.33043	0.00880573	0.00936274		38.4983	27.2407
DGAT1	15.8358	18.131	11.8435	14.7518		35.3844	24.6436	16.3807	33.2485	44.0341	32.0036	53.2129		-4.48742	0.00158069	0.00286877		22.0594	24.2529
DGKA	62.1617	69.0214	50.3872	68.4284		40.1289	65.1063	33.8587	44.8095	20.8062	31.4586	37.9703		3.3927	0.00846352	0.0090202		45.9831	45.3905
DHX30	37.3149	34.1868	38.4896	42.3792		52.8706	40.175	75.5166	50.6003	66.8747	46.6597	52.9589		-3.83283	0.00435705	0.00576607		42.8103	51.0914
DHX35	3.96797	3.55642	2.78103	2.98783		4.75637	5.87272	5.3491	5.28296	4.48863	4.60018	4.97605		-4.78124	0.00767448	0.00842075		4.52871	5.9203
DHX57	8.81862	8.1249	7.18902	9.27263		10.3665	10.4798	15.6542	16.2159	12.8437	13.7787	11.993		-5.00771	0.000783708	0.00151288		9.05155	12.6421
DNAH17	0.359959	0.331429	0.412103	0.224071		0.801471	0.318052	1.40225	0.839862	1.72528	0.750498	0.925004		-4.05212	0.00292143	0.00431028		0.631908	0.54412
DNAJC28	10.4273	8.97692	8.33612	8.10734		13.0428	18.0413	15.3891	11.694	17.3669	11.9865	12.1135		-5.06538	0.000715595	0.00148434		10.9318	8.65891
DNAJC5	33.7198	41.5714	35.6175	43.4799		44.0961	51.5299	58.375	57.6456	57.3292	52.2929	57.973		-4.72046	0.00411363	0.00562335		38.1526	40.7537
DNAJC9	12.7512	11.7653	13.9991	24.8679		39.1029	30.8881	25.2292	16.1672	44.8475	36.3156	56.5376		-3.43741	0.00981077	0.0101192		16.2525	22.0605
DNMT3B	1.3665	1.29975	1.38358	1.14469		4.25329	2.80182	7.45869	2.09863	4.01356	3.06418	3.57364		-6.57352	0.000323487	0.000842075		5.50462	4.20147
DPM1	39.4832	35.3471	39.3448	32.6623		74.0647	54.1288	62.8957	31.3619	50.5524	50.5997	57.4452		-3.32771	0.0103429	0.0104474		39.4691	32.2059
DPY30	77.5562	57.7805	72.888	74.032		97.0235	92.622	112.643	73.1379	136.821	99.0213	135.711		-3.7354	0.00474059	0.00613716		60.4279	79.9396
DROSHA	13.044	13.7144	13.8871	15.8226		21.3575	25.6712	23.6261	20.7323	29.1795	22.9833	29.8426		-8.1601	1.94126e-05	8.56348e-05		16.8303	20.1657
DSN1	10.1101	3.71574	4.84774	7.76087		16.2284	13.5661	82.4139	12.6882	67.7629	14.2124	16.1254		-3.50208	0.00672132	0.00779276		8.94712	8.31391
DTD1	81.0221	61.6983	83.7875	82.2679		124.913	115.542	188.609	101.255	151.31	103.825	109.106		-4.34561	0.00200225	0.00331121		90.9944	78.2728
DVL3	56.8005	43.1536	49.8904	46.8733		56.4285	60.1279	118.528	74.7605	85.0668	58.2568	117.737		-3.48229	0.00796244	0.00859202		63.8529	69.7628
DYNLL2	90.1977	66.4028	56.9165	69.5984		136.695	84.0409	140.956	122.271	100.144	157.487	177.643		-4.41305	0.00216433	0.00351103		85.4009	120.806
EARS2	6.56724	8.95396	7.05359	10.273		17.3098	19.1163	10.2922	15.3589	16.3958	11.4084	16.5657		-4.52058	0.00280023	0.0040962		8.6841	16.62
EBNA1BP2	129.466	102.97	168.508	109.94		73.6774	45.8238	54.9517	103.176	66.1467	60.0308	47.3328		4.59192	0.00188324	0.00319703		121.076	125.476
ECD	28.7685	22.4845	30.7496	29.2616		38.7844	45.4238	35.4966	39.7608	47.9363	38.1446	44.4857		-4.92767	0.00406768	0.00560908		28.7731	33.2006
EHMT1	35.4818	29.6956	23.1644	33.8357		45.8587	46.6937	56.0405	62.9679	44.7822	45.3923	45.4223		-4.53244	0.00710977	0.0080354		51.8088	59.0942
EHMT2	40.2073	31.3851	31.7469	37.3124		50.1507	52.7159	81.1653	50.7622	57.8139	42.8046	46.847		-4.30982	0.00200925	0.00332548		46.864	41.2331
EIF2AK1	28.7945	21.1275	22.973	26.0142		34.9632	36.7206	33.0466	36.7685	43.8031	30.8779	25.0436		-3.45015	0.00905879	0.009534		30.5805	36.3769
EIF2C2	8.99549	11.4264	10.1527	15.3767		19.3219	27.8452	16.6292	19.7168	67.3947	25.8964	56.0307		-4.01256	0.00331521	0.00493827		12.0725	16.2496
EIF4EBP1	110.204	85.5225	94.178	105.469		102.853	54.6171	45.1645	70.7021	77.9524	68.8191	59.2735		3.40238	0.00824334	0.00882038		36.5678	111.249
EIF5	165.99	165.837	152.423	157.91		237.461	215.554	219.947	245.98	256.462	250.176	244.991		-12.2133	8.3026e-07	1.42725e-05		193.372	284.175
ELAC1	27.8122	29.8391	27.9116	25.1523		36.7061	43.6981	47.3252	33.3546	57.1991	38.1757	26.0959		-3.44268	0.00979293	0.0100764		27.9311	36.1497
ELF2	60.8231	61.1041	49.0882	61.2312		85.9847	62.7054	92.4652	76.2154	75.6533	78.454	70.4195		-3.92546	0.0053098	0.00662242		104.479	89.5732
ELOVL1	84.6203	85.3964	72.5353	76.5863		47.6379	73.27	37.6142	69.287	49.7908	49.898	73.2862		3.39078	0.0100144	0.0102476		50.1983	36.9476
EME1	3.13555	2.55774	2.6418	3.27113		5.05802	6.87959	6.67001	4.39735	7.49836	3.29352	4.85905		-4.86394	0.00100683	0.00182687		4.93033	3.89376
ENO1	185.976	207.201	188.38	231.971		74.3557	102.895	102.179	217.547	80.663	38.5275	145.426		3.5054	0.010612	0.0106473		40.0311	15.7106
EPHB4	42.733	31.1749	30.6581	53.8752		101.418	97.0046	105.114	66.3557	85.012	102.311	110.574		-5.93424	0.00280967	0.00412474		80.2501	68.6618
ERBB2	93.1476	80.736	94.4107	74.2057		142.52	158.458	111.696	86.2989	104.537	133.47	123.471		-3.60721	0.00571446	0.00693642		96.3742	103.554
ERCC1	12.1021	8.69029	11.2916	9.04604		17.729	19.7039	14.3733	15.7347	13.3317	12.0494	12.0413		-3.42815	0.0104279	0.0105188		15.795	12.3882
ERCC2	8.92706	8.03433	8.43345	7.1024		10.9006	16.6306	17.7575	10.7412	11.8781	9.14884	9.90698		-3.68915	0.00568911	0.00687933		7.2391	8.11882
ERRFI1	141.452	305.479	272.722	246.035		63.2803	103.309	122.056	107.317	113.377	55.9238	113.445		4.38058	0.00484445	0.00630843		76.8106	173.729
ESF1	16.7839	12.1571	11.4594	17.9522		28.8206	21.6644	40.4483	22.8125	30.2462	30.6899	22.0511		-4.58823	0.00312735	0.00462428		18.3699	31.8515
EXD2	9.83006	6.69063	6.47139	5.43514		12.2189	15.4175	6.75867	13.1575	16.6678	14.4968	11.5736		-3.48346	0.00929662	0.009691		6.7418	8.29203
EXOC3L1	3.67995	3.34317	3.08335	4.50934		2.63606	2.29461	2.56126	1.71713	1.57513	3.23102	1.18089		3.59842	0.00589883	0.00716478		3.31889	3.01828
FAM111B	31.6488	45.489	41.3911	31.1113		16.0132	21.5379	15.9063	15.3441	10.952	19.2753	32.3548		4.56355	0.00137085	0.00259759		45.7934	16.7394
FAM120C	40.4358	33.9821	40.3021	43.2736		45.4168	46.7387	54.6512	57.4212	80.2854	56.2945	55.8301		-4.00587	0.00309039	0.00459573		19.655	58.5726
FAM123B	2.44293	1.80466	1.90066	2.62645		2.34349	4.7995	4.46345	7.27645	8.39951	3.21868	2.64054		-3.29735	0.0103006	0.0104189		3.54047	6.92041
FAM149B1	17.7191	13.5259	12.0699	15.7203		23.9983	26.1534	16.6182	15.5364	21.9208	24.9228	27.006		-3.40067	0.00939885	0.00974809		14.278	21.3379
FAM161B	2.83323	3.94096	3.35267	3.16346		4.51602	5.15855	5.54592	4.51863	5.00869	4.72212	4.69366		-5.22052	0.00610994	0.00735032		2.8602	4.02647
FAM169A	7.68929	5.45463	2.95824	8.16962		14.0451	39.592	9.94355	23.6771	20.1537	16.6776	17.8756		-4.20427	0.00575423	0.00699351		7.39668	3.9432
FAM171A2	9.4445	9.75448	14.6781	9.46453		17.0682	16.1987	30.0627	19.9982	29.286	20.694	16.2233		-4.54221	0.00217922	0.00355384		22.1567	16.8307
FAM184A	1.31052	1.54499	1.25153	1.3308		2.78089	5.10966	5.21637	3.04486	1.75959	2.5382	2.38147		-5.11616	0.00135953	0.00258332		4.14677	2.48007
FAM184B	5.78845	7.37292	6.34005	3.98026		2.44818	1.08027	4.12383	2.46683	2.15747	2.20239	2.26967		4.72434	0.00123877	0.00244059		0.394517	0.952703
FAM203A	14.3243	12.3864	14.4167	16.6181		22.8065	35.2714	15.9773	20.9573	56.9949	19.2833	41.637		-3.52979	0.00899656	0.00949119		20.3616	24.0034
FAM48A	18.2527	17.2408	13.6782	15.4193		23.5001	30.8926	35.9132	23.1796	25.6491	21.0508	25.9373		-5.19915	0.000702738	0.00145579		21.4683	21.1134
FAM73B	9.54881	8.21501	8.47404	5.71246		21.3832	13.2756	18.5267	22.0449	17.4649	18.2846	13.7046		-6.00781	0.0011141	0.00214087		9.07147	7.56349
FANCB	2.07011	1.4044	1.26845	2.69838		2.74689	5.99713	3.61104	3.62629	7.14659	4.10605	6.22023		-4.26071	0.00455411	0.00592307		2.88288	4.33487
FASTKD3	12.7819	15.2411	14.8663	12.1041		29.2205	26.3917	26.5891	29.0623	36.9486	26.6837	37.8531		-9.68766	9.13509e-06	4.28174e-05		27.6126	38.0237
FASTKD5	17.5385	11.3672	11.9045	17.0319		28.2515	22.7432	36.5461	23.1118	33.4116	23.8355	33.217		-5.02348	0.00291801	0.00429601		14.2195	13.2817
FBXL18	20.1101	16.7137	16.4682	23.7206		23.5624	41.9523	28.305	31.0964	42.7354	31.2935	27.3025		-4.23767	0.00300834	0.00446728		20.4336	24.4406
FBXL20	11.0486	12.2301	10.041	11.0865		27.6987	16.0197	17.1838	12.9084	22.1143	24.4541	23.9834		-5.30026	0.000862934	0.00156997		17.785	13.4903
FBXL6	25.1916	16.7613	21.8436	20.7269		32.879	38.1053	37.8868	37.5335	75.7997	29.257	32.6179		-4.22706	0.00221664	0.00359666		32.0896	29.5678
FBXO21	39.4042	43.53	31.2333	42.9502		50.9508	70.4878	66.2464	128.887	74.8416	53.757	49.0041		-3.67876	0.00523489	0.00656533		36.7711	42.828
FBXO32	38.4921	38.9767	30.7037	59.0667		59.2199	136.028	138.626	70.5588	533.386	93.1436	295.805		-3.81952	0.00501064	0.00645115		58.1508	53.1728
FDX1	64.2875	81.7612	72.5968	76.0527		44.3922	58.6516	41.8118	63.632	51.6789	43.4893	51.7753		4.83652	0.00100547	0.0018126		53.4825	74.5486
FIP1L1	32.4211	27.6073	32.7664	27.9444		57.5462	46.3725	41.8887	34.2532	74.3845	57.3942	62.8047		-4.97307	0.00104559	0.00195533		32.1539	28.5505
FITM2	14.8835	13.7036	9.91757	23.0736		41.4104	29.1611	49.043	19.2852	49.4787	42.6418	35.4996		-4.21618	0.00523692	0.0065796		19.3749	19.1104
FKBP2	92.03	95.9132	140.015	81.9253		44.427	55.4395	68.4033	80.575	52.6032	42.7415	75.5257		3.60876	0.00897389	0.00946264		70.7597	82.8233
FLT1	15.4509	18.7214	21.8705	21.5933		9.47689	8.55501	10.7108	12.3089	11.8499	11.6378	8.31011		6.1708	0.000676315	0.00142725		14.3993	16.0418
FOXF1	1.973	1.58964	3.568	1.75712		0.319237	0.468368	1.03955	1.16586	0.519473	0.755267	0.513995		4.82867	0.00139494	0.00264041		2.57324	1.14923
FRYL	6.15788	7.71909	6.62361	11.687		19.3015	17.189	11.4587	14.3652	43.7975	25.9856	20.7886		-4.3387	0.00208499	0.00339685		7.88485	11.7563
FSTL4	1.4946	5.92013	2.17289	1.51858		0.671417	0.72361	0.44977	0.377928	0.148036	0.413432	0.604217		4.3727	0.0059655	0.00722187		1.25059	1.00662
FTSJ2	35.1845	25.1418	29.8873	31.2633		40.0228	58.6308	54.5659	42.0365	55.9141	39.4615	32.1287		-3.67078	0.00533523	0.00666524		44.1167	44.4741
FZD7	178.77	186.455	115.447	213.893		421.569	332.748	392.743	254.534	238.125	417.217	526.534		-4.32827	0.00368566	0.00526654		185.924	124.066
GANC	4.51684	3.67434	3.7441	4.98907		9.97022	6.64153	4.13851	6.97994	5.15098	8.66221	6.18138		-3.3276	0.0088825	0.00940555		6.75284	10.4183
GAR1	31.1814	25.3806	31.3427	32.8352		35.846	48.5804	44.0478	42.3351	34.9083	35.7416	50.268		-3.9064	0.00449018	0.00589453		34.7605	39.0119
GART	77.8986	64.3787	77.399	96.9805		103.293	141.486	118.175	148.369	164	101.514	109.724		-4.20446	0.00385092	0.00546635		77.094	125.025
GBE1	45.7018	35.1826	42.0071	38.8356		20.1742	19.7797	27.3959	41.8137	31.616	23.3363	30.836		3.43984	0.00792715	0.0085492		24.6716	22.1753
GEMIN5	16.9708	15.063	16.6947	23.0872		23.8124	27.9785	29.4299	30.6283	40.754	25.0128	26.7139		-4.26412	0.00503564	0.00646543		20.996	28.4528
GGT6	132.671	196.76	86.8289	103.574		52.1886	34.1308	32.2572	108.585	25.9039	46.0674	65.5852		3.81038	0.00493656	0.00637979		54.5632	181.569
GIT1	27.7744	18.2494	19.8047	20.6679		37.798	35.9214	42.8358	36.4564	32.9279	29.2652	45.03		-5.09522	0.00326181	0.00480982		25.3977	30.5483
GMPPB	40.9319	51.8709	45.1237	31.6919		15.8088	24.2982	31.2848	24.0906	29.5177	18.6958	21.5948		4.29747	0.00329464	0.00485264		27.724	46.3738
GNB1	261.546	275.479	210.921	256.118		157.993	140.145	167.864	220.895	191.535	160.971	218.783		3.90101	0.00400726	0.00556626		227.474	180.89
GNMT	4.64284	10.252	5.57135	5.79985		13.3722	14.7454	13.4177	24.5429	25.4021	11.4228	6.36054		-3.32605	0.0100661	0.0102619		16.7084	20.0935
GOLGA7B	6.1652	9.48289	7.1045	4.52923		0.368415	1.01558	1.14402	2.57312	4.77737	1.78664	1.66619		4.385	0.00209368	0.00341112		11.9298	15.6191
GOPC	29.9437	20.681	20.1204	20.4251		35.1303	42.2575	37.5775	33.474	40.7672	33.6723	30.636		-4.47872	0.00948268	0.00983373		26.3151	36.779
GOSR1	16.5231	21.2256	16.9646	15.7201		25.1048	23.5261	21.6127	27.4584	21.7487	25.0168	31.6908		-4.2479	0.00456919	0.00596589		18.1691	32.8682
GPAA1	170.279	150.622	196.218	131.989		296.283	280.121	191.001	179.304	525.277	276.845	286.572		-3.41049	0.00784434	0.00849211		176.256	169.385
GPR19	2.81755	2.50031	3.48864	5.56832		11.8709	5.01258	10.2464	5.18118	11.2912	8.50412	10.1441		-4.05472	0.00565865	0.00682224		10.3363	5.76386
GRPEL2	13.1421	9.61964	10.8816	14.3696		14.076	17.1006	22.2733	16.5128	26.4044	17.9212	24.8191		-3.9009	0.00471755	0.00609434		15.2398	12.857
GRSF1	83.9366	65.1914	90.8889	108.001		142.725	184.132	94.4861	125.255	342.769	155.4	147.212		-3.32689	0.00884575	0.00937701		100.063	133.017
GZF1	16.3755	9.64951	12.1556	13.3283		21.214	15.8409	24.3166	25.089	24.2842	23.1359	27.6894		-4.56573	0.00511739	0.00653679		23.7892	25.4044
HAUS5	6.70525	5.18578	6.574	6.3519		13.8639	12.9423	14.5489	6.50831	11.8273	9.94446	8.10809		-4.3199	0.00223122	0.0036252		9.3534	11.5647
HCCS	21.6878	19.3487	16.2709	17.3266		36.9916	27.0813	29.5971	25.0661	38.8839	28.3022	31.0356		-5.72149	0.00048975	0.00111325		22.5578	19.0205
HEATR1	17.5739	13.3654	15.8296	13.0713		22.3822	23.2683	34.8562	27.3896	34.2476	23.0503	22.7575		-5.62645	0.00044505	0.00101334		16.0944	21.3889
HEATR6	12.4606	10.6883	9.4488	9.06332		17.0821	13.1469	11.9506	14.1186	13.6728	17.3469	15.4439		-3.87516	0.00780525	0.00846357		13.8602	11.521
HEBP1	178.637	151.109	212.595	167.577		159.126	139.551	92.0647	123.829	62.063	113.042	73.8381		3.56389	0.00651766	0.00766431		136.769	120.353
HELZ	8.50702	12.2473	8.3024	9.85874		16.4366	13.0618	19.9972	17.7404	19.9751	18.1238	17.7334		-5.68223	0.00193061	0.00325412		18.8392	21.2045
HHIPL1	18.8476	15.3294	11.7187	25.4335		3.78465	5.65788	7.23477	3.51376	2.61708	12.3118	7.89665		4.39535	0.00179738	0.00313994		8.35127	2.86903
HIP1	6.20067	8.22078	8.97052	7.89175		4.70238	4.88784	8.17634	4.49953	4.12909	4.94263	3.38698		3.727	0.00479011	0.00622279		4.97783	4.72275
HMGB2	84.5138	67.6004	58.5925	97.8516		155.74	167.896	174.89	84.1186	145.025	109.258	227.458		-3.89167	0.00419673	0.00566617		259.167	112.811
HNMT	64.4726	57.5034	60.6428	34.2947		30.4818	28.3478	33.6795	18.862	13.7895	51.5182	17.9654		3.25393	0.0104123	0.0105045		34.607	13.6438
HNRNPA2B1	736.838	621.247	616.151	617.842		780.643	840.929	861.887	811.242	1010.49	637.554	1015.6		-3.5486	0.00623536	0.0074645		973.113	886.937
HNRNPH3	168.835	124.089	135.817	142.66		269.646	195.711	202.578	167.122	174.822	239.548	221.114		-4.16372	0.00317586	0.00466709		163.769	173.645
HNRNPUL1	215.537	185.542	214.534	207.871		268.898	276.454	278.032	256.577	281.279	259.941	231.571		-5.79753	0.00104517	0.00194105		303.76	284.633
HNRPLL	53.1335	48.8706	39.1264	49.0049		107.071	69.949	56.8931	62.7459	68.1163	97.3988	81.2372		-4.31889	0.00195052	0.00326839		60.847	51.7357
HPS1	24.2485	27.0646	28.8638	25.9674		20.1705	22.3204	17.7704	19.7514	23.0075	17.6372	12.8565		4.16832	0.00288455	0.00426747		41.2878	43.9331
HSD11B1	61.1649	80.2053	136.32	23.1294		11.6367	10.8187	12.1074	29.8138	7.20022	9.85596	5.84023		4.157	0.0100931	0.0102904		9.42454	23.6389
HSF1	47.0592	32.4829	40.7764	41.8944		78.2019	73.8055	54.3921	48.1849	156.216	64.3801	104.702		-3.80405	0.00476359	0.00617998		48.6135	48.0439
HSF2	8.81784	6.84723	6.92382	8.79484		10.9521	15.6823	16.7656	18.6318	28.2747	10.3086	8.86677		-3.72529	0.0056637	0.00683651		10.3444	8.12067
HSPB11	12.3123	9.40328	15.5043	12.2841		6.55774	4.5175	9.97159	6.87937	7.23432	4.9081	5.50735		4.5773	0.00183932	0.00316849		7.84257	7.88598
HUWE1	31.2461	33.7376	34.4182	32.1841		52.0488	49.3968	40.8337	68.3854	47.1022	55.4145	28.9629		-3.53143	0.0106918	0.0107043		42.1369	58.2052
HYI	19.475	12.7203	21.2038	16.6156		9.42575	8.71089	8.08297	11.6814	3.76595	7.13461	5.29287		4.69199	0.00116141	0.00226932		19.905	9.70082
IBSP	5.61723	0.261899	21.0208	5.58932		1e-06	1e-06	1e-06	1e-06	1e-06	0.317951	1e-06		6.5332	0.000145305	0.000485264		0.265157	1e-06
IFT20	31.2848	29.1325	25.8113	21.8841		47.3672	37.899	42.5818	32.7862	61.0993	45.2777	49.5513		-4.67214	0.00172035	0.00306858		28.3197	30.7512
IGFBP3	39.8785	29.7228	42.868	43.5214		17.8908	25.0049	11.9568	10.9876	21.0418	14.2803	10.3857		5.98363	0.000206934	0.000656533		19.6396	14.1579
IGFBP6	178.622	147.997	124.539	232.074		90.5926	138.003	76.092	18.8506	29.2577	86.0761	25.9587		3.59603	0.00688423	0.00792122		146.216	91.319
IL18BP	53.9651	133.062	104.02	65.3729		9.29486	15.5924	35.0036	29.5297	23.3676	8.67605	14.4711		5.41965	0.000642405	0.00138443		19.414	16.5517
IL1RL1	38.4273	36.2844	71.9511	69.811		1.94951	8.38943	9.25133	40.7858	1.01792	3.18812	3.81923		4.73816	0.00161547	0.00288304		4.08516	3.07775
IL22RA2	5.70919	28.4092	10.7114	17.3534		0.294929	1.47545	0.310267	1.51659	1.58603	1.19873	0.801014		6.20632	0.000491322	0.0011418		3.00737	10.5642
ILF3	68.8356	63.3584	65.9259	75.1678		88.9402	87.9445	103.235	95.2905	121.407	81.1069	104.237		-5.56808	0.000348611	0.000899165		101.534	105.513
ILK	121.167	81.9134	121.206	98.1325		57.9189	66.8835	64.0667	90.7874	49.4541	67.7757	84.1907		3.53975	0.00962543	0.00997645		169.509	106.462
IMMT	88.9125	98.7093	93.9315	89.4893		100.048	124.681	113.77	125.266	144.002	93.209	128.872		-3.79777	0.00544513	0.00672233		104.094	103.079
IMPDH1	55.8569	51.4959	49.7109	61.0904		63.4296	70.226	76.6109	57.3974	77.5596	62.8743	83.5203		-3.60759	0.00621635	0.00743595		54.1303	49.4994
ING3	6.19922	3.88326	5.16642	5.00617		10.0568	6.98989	7.83315	7.66269	5.88541	8.94267	10.8921		-3.91671	0.00584287	0.00712196		7.76986	7.8423
IREB2	19.8029	19.2181	17.0262	18.8873		31.3282	27.5989	41.5382	45.8244	108.3	40.5889	56.9249		-5.15304	0.00170484	0.00304003		38.3135	51.6491
ITGB1BP2	0.695456	0.50943	1.07863	0.434342		2.56066	5.60883	4.18267	1.79262	1.59013	2.29504	0.815222		-4.06346	0.00298041	0.00442446		1.04959	0.673603
ITM2B	1768.59	1747.98	1972.83	1495.11		1264.95	899.894	813.949	1595.47	960.341	1150.85	912.899		4.68099	0.00117634	0.00231214		1100.62	1124.66
JMJD1C	21.5604	27.4474	21.7393	21.5845		33.8885	36.7907	32.0759	27.7613	30.344	40.3326	23.0158		-3.46266	0.00749198	0.00836366		27.3465	36.0678
KAT2A	18.5417	14.9026	18.5876	24.361		27.585	30.5817	33.9706	24.3688	50.1588	26.6932	60.7608		-3.66707	0.00524357	0.00659388		17.2302	21.9642
KAT6B	20.6647	15.3144	18.3425	18.4802		25.4037	27.1708	25.3862	23.6557	25.763	24.3551	26.7579		-5.28716	0.00858665	0.00914865		23.7259	29.72
KCTD20	18.0043	22.7548	16.367	16.0277		23.6797	30.3667	31.6281	32.1592	47.411	31.1288	33.4737		-5.17689	0.000920595	0.00172697		27.6155	29.9441
KCTD3	75.2737	75.3756	67.769	90.8727		155.198	68.6299	194.228	131.926	136.195	177.607	220.52		-4.11185	0.00354054	0.00513809		145.561	190.209
KHSRP	40.8057	45.2054	36.1452	34.4295		59.4275	55.1345	46.2901	54.6615	61.4949	53.6053	49.1978		-4.5612	0.00525782	0.00660815		51.9459	50.532
KIAA0430	13.1453	13.3978	9.09986	13.2104		19.4119	31.8949	15.6545	23.1562	19.9549	25.4398	14.9884		-3.96005	0.00382535	0.00539499		17.1722	24.2542
KIAA0494	54.1088	63.4049	63.894	43.4998		31.9691	33.4455	26.6531	37.1292	16.9888	36.0808	39.9195		4.1594	0.00256072	0.00388211		71.1273	67.9148
KIAA0947	11.8623	11.9508	9.17311	12.3212		16.761	18.3499	23.1953	21.3306	21.4745	16.9331	32.1597		-5.67593	0.000320434	0.000827803		16.4781	21.7196
KIAA1109	5.64205	5.76151	5.26603	6.05687		11.6456	6.86247	12.6017	11.0453	9.53675	13.267	7.20286		-5.47172	0.00095334	0.00174124		7.23786	13.0178
KIAA1539	16.5848	20.1005	15.9863	23.5835		9.2002	17.8822	10.3401	14.9358	11.1666	11.0749	7.54188		3.59194	0.00604356	0.00726468		9.52475	8.67934
KIAA1737	29.6577	30.1122	21.6342	25.8403		51.1295	53.3539	33.1568	51.3439	34.1307	43.1653	27.827		-3.46315	0.00724148	0.0081353		39.463	59.7302
KIAA1804	2.89413	2.34285	3.46587	3.43921		8.60359	9.07011	5.5589	7.12162	5.98826	7.03859	11.2841		-7.08585	9.8566e-05	0.000328267		8.92009	13.3919
KIAA1967	51.5445	52.4756	40.758	46.6477		69.1232	46.2197	78.6125	65.3004	66.5211	61.4734	76.7138		-3.59776	0.00617273	0.00737886		64.2398	60.217
KRIT1	14.2877	10.4009	10.0019	11.0512		15.8717	18.2469	25.0097	16.344	17.2602	16.369	20.2825		-4.7415	0.00266552	0.00396774		16.0866	16.1606
KRT79	13.1112	1.03604	1.30871	2.66339		550.657	121.874	67.4762	187.608	360.62	526.59	525.545		-7.04477	0.000995653	0.00176979		26.1998	14.7317
LCLAT1	14.9445	17.2367	9.45674	14.3002		21.8531	28.7765	23.4801	18.3112	39.042	25.283	20.1042		-3.65189	0.00994072	0.0102334		12.5973	17.3283
LEPREL2	25.8521	27.3166	34.312	39.5592		4.90884	14.9016	10.3613	19.3876	11.5243	13.8116	3.87473		4.6946	0.00157282	0.00284022		17.256	8.57143
LGALS3	690.732	728.982	414.692	595.956		239.046	284.454	250.267	557.088	167.732	385.395	93.8464		3.48185	0.00720156	0.00812103		165.857	76.2471
LGI3	3.6605	4.92349	4.6066	3.65277		2.25505	1.05003	1.47454	4.19896	3.15425	2.50382	1.36849		3.48366	0.00864648	0.00922001		1.41448	0.987715
LIFR	6.7193	5.86693	9.98044	6.21505		15.925	10.8304	57.9535	16.0307	20.6036	21.2448	12.321		-4.1116	0.00281445	0.00415329		27.0792	49.9563
LIG1	14.9659	11.3076	11.2944	14.8038		22.733	22.9369	28.304	14.1603	23.438	15.659	18.0565		-3.61306	0.00593747	0.00719332		22.197	17.5155
LIG3	29.1261	27.774	23.05	33.291		48.65	33.5353	33.5941	34.3687	37.3253	48.9198	59.833		-3.33234	0.0092775	0.00967673		30.3252	26.7056
LIPK	0.661865	0.481261	1.01152	0.265486		1e-06	1e-06	1e-06	1e-06	0.651997	1e-06	0.106583		4.13913	0.00571304	0.00692214		0.493919	1e-06
LIPT2	11.9375	12.4313	14.3566	11.837		8.90406	9.84524	7.28848	11.9099	9.31882	7.17481	11.4677		3.52604	0.00668644	0.00776422		9.73714	10.0051
LMAN2L	12.5032	9.82499	8.32882	11.6683		23.2804	18.4127	15.1998	13.619	13.0956	22.8867	24.5468		-4.06529	0.00318633	0.00468137		18.695	13.1189
LOC100505841	2.90065	1.05291	2.23849	1.25101		1e-06	1e-06	0.845284	2.36732	1e-06	1e-06	1e-06		3.92562	0.00750199	0.00837793		1e-06	1e-06
LOC643669	1.13367	0.830741	0.432384	0.455172		2.39472	1.23177	3.06979	3.05226	0.893815	1.66637	4.42237		-3.66531	0.00715107	0.00806394		2.94558	2.07296
LOC81691	5.09625	3.78096	4.7396	6.17322		8.41506	9.41907	14.9671	9.77444	13.2337	5.56872	8.82		-4.28547	0.0021567	0.00349675		22.2392	6.63314
LPHN3	2.44586	4.8444	5.11739	3.0843		8.12779	7.83568	6.70533	15.7771	22.0068	7.99126	34.611		-4.01056	0.00307829	0.00458146		8.37672	17.1058
LRIF1	57.2303	42.8986	64.201	59.3772		26.1606	24.7838	27.6682	39.7067	23.2254	22.128	49.6724		4.42521	0.00168691	0.00296867		56.8375	64.5116
LRIG2	7.65245	4.69459	3.99707	7.13415		10.4656	15.7577	12.4511	11.3863	14.1962	13.1741	13.0209		-4.91864	0.0100733	0.0102762		10.0358	13.4985
LRRC14	37.2173	30.1784	40.7476	34.8923		44.4093	49.8276	57.2892	57.5525	91.8183	43.196	63.5882		-4.00054	0.00314448	0.00465282		30.2539	38.779
LRRC15	28.1823	18.8917	2.51466	30.9298		0.794053	1.54908	0.716331	0.0636602	0.59961	3.00088	4.74307		3.49198	0.00925424	0.00964818		2.38452	5.33387
LRRC24	10.687	7.62137	10.3718	6.95748		14.9789	15.4072	23.138	13.9619	19.4444	14.3772	16.3646		-4.95605	0.00326092	0.00479555		10.3301	11.5062
LRRC42	47.9734	42.2598	38.5547	36.7841		23.4765	23.5649	22.0824	30.5227	22.1842	20.355	17.6645		7.00661	9.04976e-05	0.000299722		42.3163	23.997
LRRC68	33.4486	25.9146	31.8056	25.0586		47.0956	51.0228	50.7765	41.9953	47.6993	39.8722	34.8689		-4.80742	0.0027006	0.00402483		37.4245	32.7969
LRRC8C	23.4348	23.0376	28.8144	27.8775		11.8035	22.5614	17.7734	17.9979	15.1476	16.9801	13.6037		4.64494	0.00121275	0.00239777		14.0494	13.6197
LSM14B	71.6735	45.2312	69.6817	57.991		100.705	95.03	144.34	86.5099	75.5935	88.9889	104.189		-3.68814	0.00985911	0.010162		86.9122	93.4366
LUM	1071.54	1064.6	971.462	3132.81		357.712	507.827	373.748	322.757	54.6236	938.227	436.528		3.23741	0.0105828	0.0106187		1662.27	448.987
LY75-CD302	5.58687	7.4645	9.10148	5.11457		2.71348	3.22854	5.46957	6.31505	3.16029	3.10354	2.13344		3.26279	0.010662	0.0106901		3.92674	2.16185
LYSMD1	7.23418	9.50908	10.9225	10.8231		16.8723	16.3355	20.7983	16.0889	20.8031	20.08	13.245		-5.32776	0.00214329	0.00348248		13.569	13.4701
MAB21L3	11.898	15.0814	13.6034	6.41223		0.629743	1.22998	4.64467	15.251	3.81622	1.3349	0.372958		3.36823	0.010459	0.0105759		1.58699	3.598
MACROD2	1.61574	1.36192	2.3155	1.31521		6.60742	4.12387	4.89936	3.96134	8.40563	7.92094	2.37187		-5.36188	0.000463708	0.00108471		2.7379	5.21843
MAEA	76.634	71.972	79.9111	62.5276		47.0112	42.3238	54.6285	75.0675	40.7994	45.9541	58.7555		3.60932	0.00570111	0.0068936		74.5259	63.3126
MAGEF1	41.0592	35.1142	51.1956	37.2745		72.6513	59.8316	69.1614	52.3941	84.9131	59.3576	131.947		-4.03453	0.002953	0.00433883		67.0335	61.2955
MAMDC2	18.2473	6.54924	25.7727	12.0773		2.33342	16.5974	3.7376	3.85282	2.37293	3.36277	0.868001		3.26335	0.0104471	0.0105474		24.3723	7.13906
MAP2K1	65.4738	59.8891	61.521	56.9055		45.6474	48.2655	37.0478	57.8393	48.861	43.2754	46.7797		4.60791	0.001389	0.00262613		49.7025	64.7776
MAP2K2	86.8655	88.5237	97.9887	93.6892		131.12	116.423	121.407	132.54	153.759	118.738	107.32		-6.03246	0.000203986	0.000642261		131.914	135.211
MAP2K7	16.5499	15.7746	15.2235	13.3475		23.4855	21.3609	24.2396	25.9741	20.0506	20.212	16.9597		-4.94571	0.00087982	0.00161279		28.8496	21.9762
MAP3K4	10.3105	8.92833	8.52739	10.7214		13.5481	16.4405	12.2271	17.2502	15.2665	15.2173	10.4524		-4.50754	0.00156129	0.00282595		12.1603	15.3721
MAP4K3	6.99377	7.2115	6.66064	6.56049		8.71749	7.93877	11.0924	7.04791	11.4862	9.63292	11.0317		-4.29936	0.00349151	0.00506672		6.2172	7.106
MAPK14	17.1747	15.9061	11.3373	19.6818		33.8635	23.4368	23.4489	20.1717	31.1974	37.5565	30.5632		-3.96291	0.00693119	0.00794976		25.5179	37.6018
MAPKAP1	35.7593	37.8184	40.1524	31.0975		52.0605	38.8885	61.8516	39.8507	68.5117	54.488	41.4143		-3.21966	0.0105982	0.010633		40.8772	40.606
MATR3	187.82	177.468	165.006	167.097		181.805	236.537	217.577	261.737	213.403	200.328	197.385		-3.78419	0.00436645	0.00578035		216.436	339.716
MAU2	18.3079	17.1372	10.8046	13.2784		29.4739	27.6449	34.5653	22.695	26.5103	29.9278	17.157		-3.97305	0.00729375	0.00816385		21.7752	28.148
MBOAT7	86.8127	86.9178	93.7507	85.8064		137.037	149.03	97.4143	106.134	139.284	113.667	141.617		-5.27114	0.00107393	0.0019696		77.4452	97.4421
MBTD1	10.6911	8.02936	6.08757	5.97271		21.9138	25.673	21.4545	20.2242	19.9315	24.3735	18.7373		-7.40521	0.00269431	0.00398202		30.5759	46.834
MCM3AP	29.8609	23.9184	28.8612	30.3566		36.6754	46.5965	46.0694	42.9193	37.6366	37.7209	45.2434		-5.77417	0.00109181	0.00204096		36.0808	39.6255
MCM8	10.3274	5.04377	6.36323	6.62758		16.7899	13.9484	21.5847	10.4551	13.7076	15.3491	11.0963		-4.1847	0.00735935	0.00824948		10.9159	12.025
MDM4	6.49291	8.09111	4.89869	6.00247		9.23671	10.5182	15.4815	17.9042	10.9295	14.5044	26.6156		-4.71621	0.00110518	0.00208378		4.7409	10.9528
MDN1	5.87952	4.71068	7.37343	6.94955		11.18	14.4151	15.8041	16.5343	19.743	12.2477	4.94419		-3.61833	0.00584238	0.00710769		7.52848	19.9151
MED1	23.6337	32.466	20.2627	33.3765		41.0109	42.8298	33.6267	54.1208	41.3764	58.4328	79.8104		-3.59678	0.00809495	0.00872047		31.4626	56.0394
MED12	20.6943	15.4781	16.4292	18.1183		28.2432	23.66	27.9598	27.1688	28.3548	27.4979	16.4276		-3.67269	0.00540112	0.00670806		25.7938	22.2496
MED22	29.2917	22.6322	29.9855	33.432		38.5698	55.6031	44.5651	36.1534	48.4322	52.5464	88.521		-4.02197	0.00301925	0.00449583		45.7046	41.9069
MED24	21.5726	24.2892	19.7654	18.9526		37.4217	25.5066	38.0569	26.2014	33.0512	32.559	30.5804		-5.01917	0.000889533	0.00164133		28.0537	22.5508
MED7	59.5673	43.8335	52.1341	45.0213		69.0625	96.6496	85.8098	54.9956	71.0297	62.7818	103.208		-3.74675	0.00473147	0.00612289		56.4803	59.7439
MEGF10	6.00832	6.26659	5.86815	10.8907		0.461974	0.841795	1.0343	4.44944	2.42343	2.1342	1.53732		4.89278	0.00102881	0.00189824		1.84815	1.23462
MEGF8	7.44137	8.23015	7.73285	10.6069		17.0128	12.1778	18.7726	14.5239	13.4498	20.7178	12.664		-5.39223	0.000697339	0.00144152		9.57535	9.76791
METTL2A	20.7254	14.0338	17.7528	19.0764		28.4616	22.9189	36.0572	24.0291	33.09	32.6112	31.6181		-4.80557	0.00241869	0.00376793		20.4892	21.2155
MFAP3	12.6226	18.1574	13.1825	20.547		27.7574	23.3389	40.8469	22.0845	34.4581	33.615	38.8738		-4.43838	0.00368452	0.00525227		29.7032	26.3019
MFGE8	1290.72	1455.75	4080.72	1883.45		138.969	410.608	214.814	316.176	645.374	218.099	246.912		6.06144	0.000821131	0.00154143		609.09	1594.53
MFN1	46.3865	41.7924	38.9866	32.3935		52.8987	57.5715	53.6642	56.0821	57.8339	50.3805	76.1273		-4.07304	0.00718897	0.00810676		49.056	64.7233
MFSD4	28.0958	33.8221	42.2014	39.58		9.16705	19.3447	6.86818	6.71664	12.6129	11.0749	4.72238		6.81295	0.000107771	0.000356812		11.3062	6.31258
MGP	1589.58	775.384	1521.17	390.86		196.413	212.692	84.0382	352.87	19.7735	518.66	219.388		3.32669	0.00906228	0.00954828		320.834	38.2616
MICU1	27.1869	30.0182	28.0991	28.6099		44.6087	33.6248	35.6931	28.5185	33.5777	39.1523	38.5049		-4.04624	0.00415097	0.00565189		37.9312	25.7058
MIOS	34.0303	27.4436	23.0173	27.7897		38.4523	34.4662	35.8746	39.7603	54.9391	37.4652	50.6421		-3.72887	0.00733401	0.00819239		33.1441	37.5573
MKKS	100.053	89.906	72.996	94.5713		133.928	141.106	124.736	131.3	189.679	128.147	154.929		-5.32577	0.00124299	0.00246914		108.14	78.7879
MLL2	7.00191	8.36439	7.08853	9.12918		14.7883	13.6402	13.3794	23.5707	11.2573	18.9174	15.793		-6.0304	0.000195151	0.000613716		10.6934	20.1899
MLL4	10.4189	10.0176	11.4683	10.6517		14.8432	18.7492	23.0038	18.4597	17.0483	14.5787	11.8138		-5.17213	0.001118	0.00216941		17.4449	17.4115
MLLT1	34.2886	35.7318	37.0467	36.5431		40.2072	46.4578	52.9571	49.761	49.6925	42.888	40.7261		-5.55811	0.000590565	0.00132734		41.5627	59.8147
MLLT6	24.749	18.8146	14.8616	14.7159		36.1879	38.8805	30.0043	31.7107	29.2858	38.898	32.4479		-4.86442	0.00925553	0.00966246		21.674	32.0783
MLXIP	13.7518	18.5573	13.6001	12.7663		21.2387	19.9509	25.4578	24.7669	23.5834	27.7895	14.5498		-3.59817	0.00725299	0.00814957		10.7533	20.3017
MMS22L	2.15501	1.92516	1.45064	3.42468		6.24077	5.47189	3.55773	5.24073	5.57194	6.20801	3.37786		-4.16923	0.00962271	0.00996218		4.23685	3.58296
MOBKL1A	6.8283	9.7842	5.37582	10.7984		15.6654	20.9548	9.12007	15.5461	29.7069	22.8875	26.9896		-3.9208	0.00475661	0.00615143		10.0497	21.5173
MORN2	9.66349	5.70581	9.18794	6.19432		15.308	15.0861	16.5105	10.5806	40.805	15.4018	16.9111		-4.00892	0.0033081	0.00490973		8.29479	13.2592
MPHOSPH8	16.0569	13.472	12.4354	15.8203		19.7836	17.8935	20.1531	18.567	18.6651	19.5669	26.3241		-4.18224	0.00480363	0.00625134		18.4303	19.0721
MPHOSPH9	10.4826	9.97197	7.22964	13.569		15.7361	21.6355	25.4575	26.1901	37.7886	18.4528	17.5008		-4.639	0.00217083	0.0035253		15.601	14.744
MRPL13	21.0447	14.9336	19.5096	19.5588		39.9576	36.2163	31.596	25.3649	108.614	33.3858	47.6358		-4.11024	0.00353481	0.00512381		23.5979	21.3212
MRPL4	42.2618	42.0463	37.4627	37.4451		61.6418	73.8104	60.5652	46.6334	90.3015	52.9985	45.8372		-4.17511	0.00361813	0.00522372		52.406	60.0893
MSL1	35.6631	31.7587	34.0133	32.4211		46.0819	40.2682	54.5054	43.5839	51.3931	47.337	49.2679		-7.48481	3.79138e-05	0.000156997		42.9569	45.4246
MSL2	22.3684	23.1909	17.407	17.8589		18.4556	38.1582	30.897	30.6983	32.003	24.9557	39.9349		-3.21852	0.0105556	0.0106044		36.0873	29.9382
MSL3	39.9307	27.8154	41.0072	39.5676		69.7813	62.0361	55.5496	44.4552	55.9084	60.3513	48.5571		-3.92669	0.00964296	0.0100335		56.0043	50.5467
MTBP	5.53686	3.13474	3.79358	5.32696		12.3017	8.91526	12.2775	5.99039	23.2044	11.622	11.4939		-4.70494	0.00128357	0.00251195		7.87922	6.01496
MTERF	11.4887	8.73914	6.24353	9.76694		20.0721	19.4274	27.1847	13.4641	15.2601	13.0572	16.0568		-4.12743	0.0053727	0.00669378		12.5911	10.8602
MTERFD3	22.7878	19.5606	24.9251	21.3805		31.0173	36.1627	29.4424	31.7779	22.4683	28.3206	36.7009		-3.98907	0.00328758	0.00483836		28.4816	27.5482
MTMR12	3.09427	2.08929	2.12351	2.07722		8.1595	4.60391	2.35335	4.71983	4.14713	5.46957	7.24722		-4.13312	0.00260368	0.00392493		3.02909	4.08549
MTRF1	6.56848	4.53404	5.20871	5.52942		11.709	6.40706	9.97853	8.4121	11.2373	8.75808	6.89205		-4.23856	0.00242277	0.0037822		8.33619	11.5648
MTRF1L	9.67727	8.19904	10.9776	7.50353		13.1074	17.519	16.9471	13.7359	15.6157	16.2625	11.2935		-4.77037	0.00307785	0.00456719		12.0768	9.15253
MUC16	5.11415	32.3006	5.54051	10.9092		0.669419	0.352558	7.01258	1.53683	2.19781	0.648025	0.0264616		3.34709	0.00865243	0.00924856		19.752	19.2497
MYC	110.855	107.02	140.697	148.584		209.571	227.847	174.557	217.164	381.393	170.247	192.175		-4.14823	0.00258213	0.00391065		159.603	217.882
MYCBP2	11.6736	12.5828	7.68216	12.5165		22.0805	16.8016	21.214	17.6378	20.6938	25.3471	18.0245		-4.69011	0.00764136	0.00840648		13.085	31.3135
MYO1B	50.1958	77.2029	41.2858	48.5716		14.4352	20.2853	23.9734	41.7593	14.7126	22.8681	14.8766		4.83037	0.00114025	0.0022265		54.8381	27.0658
NAA16	11.4438	8.76629	6.64458	7.53947		18.3867	9.12144	33.2071	21.2267	15.7663	15.6101	16.566		-3.87143	0.00388154	0.00548063		10.8028	10.4616
NAMPT	140.529	195.927	103.229	100.531		42.0713	58.6836	65.8933	94.5091	67.1482	41.2308	83.0974		3.76619	0.00828397	0.00884893		58.0128	85.9876
NANS	130.678	180.134	157.149	126.259		68.5203	104.169	53.293	139.795	55.4956	78.8016	90.2901		3.92551	0.00354683	0.00516663		82.8619	136.763
NCOA3	11.6697	13.7631	9.59366	19.2187		21.7366	28.3565	34.739	23.9773	29.3729	27.6754	25.4652		-4.58583	0.0105336	0.0105902		19.274	23.2427
NCOA6	40.1684	37.6701	31.6346	33.9797		50.0396	53.8894	66.6818	57.9999	47.1992	53.4285	56.3373		-6.32245	0.000494371	0.00115607		53.5452	68.9172
NDST1	30.1513	33.3256	19.9921	23.083		59.8351	40.1603	44.8473	50.1989	74.4572	77.9939	113.12		-4.79775	0.00108599	0.00202669		60.2873	140.48
NECAB3	3.09679	3.66701	3.2061	2.61397		21.6152	6.6517	36.7797	3.21008	8.53037	12.8319	16.9611		-4.23398	0.00441392	0.00582316		2.36866	5.82299
NEK1	13.3761	10.4597	8.02312	11.621		20.9236	13.3785	13.7473	21.0818	15.0675	21.6716	22.3732		-3.71671	0.00795194	0.00857775		15.0106	25.8186
NEK4	13.5134	10.5895	7.95104	12.044		16.8846	18.6125	26.8111	17.7642	19.6434	16.4188	13.2598		-3.68769	0.0102407	0.0103761		19.7021	19.5724
NEK8	5.97335	4.01781	6.66092	4.1414		11.1471	11.5524	14.1957	7.23536	8.92644	8.98457	7.4005		-4.06618	0.00621483	0.00742168		7.90073	7.71175
NFS1	26.5888	24.795	23.1708	29.0369		31.7311	30.1777	40.6563	32.5493	55.311	31.9972	49.0282		-3.6941	0.00548104	0.00676515		23.9233	27.9786
NFXL1	9.72309	7.6806	3.90661	7.98819		16.7733	23.3706	11.8579	9.01378	40.8818	16.1154	24.1175		-3.5172	0.00835149	0.00892029		8.85746	13.6235
NIPBL	22.296	22.8369	17.5365	25.34		38.8372	37.1659	31.0456	37.0797	34.272	42.0956	36.0255		-6.00028	0.0029804	0.00441019		29.9635	41.5281
NKIRAS2	52.2294	61.591	51.1449	69.7992		103.258	101.984	104.016	91.6861	115.594	97.7835	123.042		-7.14365	0.00116213	0.00228359		86.7197	102.17
NLRX1	32.7833	21.5729	25.0509	25.1586		11.9761	13.212	12.2776	32.3746	13.8867	16.3627	13.5062		3.34637	0.00861309	0.00919146		36.9546	35.3706
NNT	45.2906	42.4407	20.1177	47.5148		110.105	80.0379	90.3536	83.6415	118.577	110.853	297.978		-4.30277	0.0036196	0.00523799		72.1185	103.1
NOL11	22.651	18.0781	18.7036	18.9822		33.2359	30.2538	38.2876	33.3765	41.6738	29.646	45.6714		-7.51605	4.03927e-05	0.000185542		25.2022	27.396
NOL8	13.5981	10.9959	10.0198	13.8089		19.2129	18.776	22.2657	20.572	20.2062	18.6814	19.022		-6.03833	0.005459	0.0067366		13.5157	17.6445
NOTCH1	45.2213	26.4066	19.9288	52.6844		173.361	112.863	141.634	108.684	168.467	171.606	230.712		-6.12615	0.00306537	0.00453864		55.6315	69.6258
NPAS1	4.50601	2.43261	1.79722	2.54815		0.507114	1.31341	1.59886	0.399868	1.00758	0.938682	0.824783		4.24629	0.00293464	0.00432456		4.13714	0.750695
NPNT	9.93173	13.6449	20.9303	7.63077		6.02636	5.24144	3.81308	1.75702	0.885958	9.02387	1.79382		3.55075	0.00621074	0.00740741		3.94234	7.89082
NQO1	707.674	406.269	401.85	365.788		38.2178	124.385	93.5347	355.155	80.4455	34.4827	34.8011		5.00157	0.00100475	0.00179833		32.4011	46.1904
NRP2	30.1905	39.3817	44.4029	48.508		25.1268	21.5092	12.0954	6.30913	22.6028	39.1992	8.85867		3.35759	0.0102783	0.0104046		13.3526	26.2912
NSFL1C	117.796	106.751	127.39	106.68		161.28	138.781	180.661	115.469	146.309	160.841	130.626		-3.47142	0.00708065	0.00802112		98.5613	111.051
NSMCE2	29.847	24.9782	30.6126	24.8769		57.1806	56.5304	36.9509	25.3023	85.2201	58.8534	40.687		-3.5535	0.00828648	0.0088632		21.7042	32.619
NSUN2	39.27	32.0093	30.6494	48.0979		72.6267	53.5198	51.6521	55.9343	75.0025	63.624	115.01		-4.05769	0.00357042	0.00519518		36.6012	47.0777
NUAK2	5.29956	3.87216	5.77516	3.59692		3.96499	1.29163	1.50131	0.976154	1.3656	2.07174	2.97748		4.16527	0.00251097	0.00382502		0.948481	0.962645
NUDCD1	23.6469	18.5534	19.711	26.0321		45.3588	57.0006	27.9498	22.1125	109.56	43.3791	64.1065		-3.53749	0.00827088	0.00883465		21.8813	26.2075
NUP133	19.5755	16.0422	13.9941	19.1082		27.3538	24.5835	31.0234	20.3428	33.5632	28.9577	31.1408		-4.81119	0.00208091	0.00338257		21.903	24.873
NUP188	19.4672	18.3488	16.9183	21.1471		30.1285	22.7228	31.2036	29.7095	32.6632	29.6915	36.5833		-6.45575	0.000139081	0.000456719		18.394	23.7414
NUP214	16.0043	16.1343	12.0756	16.0794		20.7982	21.9772	20.2661	25.0817	23.2971	21.1568	23.1033		-5.11986	0.00703064	0.00797831		19.5019	27.7004
NUP43	17.1077	13.2954	10.7609	15.5516		20.0859	24.021	26.2938	21.9556	37.6917	20.9936	19.829		-4.03513	0.00495738	0.00639406		19.37	21.5665
NUP85	29.7846	27.5091	31.0086	27.0315		38.6746	32.3422	39.1819	32.6589	48.6557	34.5248	31.914		-3.57765	0.00631641	0.00750731		34.7716	27.7549
OCIAD1	152.586	145.208	174.554	133.914		254.678	244.83	174.661	190.87	474.001	204.856	304.342		-3.62264	0.00688776	0.00793549		167.718	157.178
OPLAH	49.5062	33.6559	42.242	33.2346		76.5144	87.3261	44.3824	72.7194	118.573	59.3449	90.2079		-4.27485	0.00214132	0.00346821		41.0144	48.9299
OSCP1	40.6405	31.4249	34.8375	29.2258		22.1361	16.3705	22.4307	38.6424	18.6832	15.8381	14.8175		3.58687	0.006172	0.00736459		46.4241	25.5983
OSGEPL1	9.40784	7.29679	6.66938	6.88221		12.1795	8.73761	18.9299	13.5727	11.2479	12.5239	17.9233		-4.41921	0.00170351	0.00301149		8.95123	12.7934
OTUD7A	1.01347	1.04011	1.4146	0.928505		0.149199	0.309541	0.201675	0.197111	0.155998	0.54183	0.29512		7.71785	4.02295e-05	0.000171269		0.741167	0.0816293
PABPC1	1091.09	812.173	1084.67	900.364		1829.38	1980.49	1138.99	1462.65	5354.02	1605.69	1790.66		-3.43831	0.0095124	0.00986227		1587.14	2340.42
PAICS	114.526	111.29	131.501	131.259		218.294	199.319	131.118	176.063	445.435	210.28	337.181		-3.89661	0.00604369	0.00727896		131.604	185.766
PALB2	6.17978	4.52073	4.35674	7.00618		7.37269	12.0125	11.791	8.77914	15.387	7.69371	10.0319		-4.07377	0.00454417	0.0059088		7.13444	9.16115
PAN2	8.89765	6.19897	6.46588	8.64268		16.9826	15.4891	10.6048	12.4169	7.44739	16.2293	17.9083		-3.81138	0.00423258	0.00569471		12.4785	11.2073
PASK	2.39406	2.0881	2.30671	2.75549		4.39401	3.03018	4.51338	3.79982	4.41654	2.74685	4.94362		-4.88525	0.000867134	0.00159852		2.56962	2.6033
PCNP	68.9578	64.6833	64.0148	64.6915		52.126	50.1777	52.2614	60.6184	48.7994	47.2293	58.1119		5.75454	0.000371171	0.00092771		67.6285	64.1362
PDCL	37.3034	36.2322	29.194	41.0588		49.8341	61.5094	44.0773	49.3525	54.3888	46.058	75.7497		-4.01735	0.00392412	0.0054949		48.4924	40.8516
PDZK1IP1	66.6581	53.3168	46.4622	51.2732		48.4902	28.0735	9.25113	28.8739	8.08577	24.293	10.2546		3.925	0.00578032	0.00702205		27.4883	15.0097
PELI2	5.97386	3.66288	3.71982	2.76993		17.5486	6.23719	23.364	3.6424	18.9894	15.6353	7.20773		-3.39277	0.00819315	0.00876329		11.9881	12.52
PEX1	17.2297	13.7201	14.8723	15.072		24.2256	21.577	14.9702	21.8486	22.2634	21.0386	26.1668		-4.25075	0.00214016	0.00345394		21.8731	27.7193
PEX11B	25.6532	20.7749	26.2835	19.964		31.2999	42.0156	32.3243	27.4629	32.8675	29.9051	29.5826		-3.76557	0.00902994	0.00950546		25.7084	22.1211
PFN1	2135.65	2546.66	2313.94	2792.85		1443.14	2046.86	1868.86	1687.88	2230.81	1533.63	1657.56		3.89925	0.00446757	0.00588025		1949.56	1318.1
PGAP2	73.3471	87.9912	72.514	62.0112		45.3112	38.5645	31.2495	70.2549	33.087	36.4215	48.7059		4.41584	0.00168643	0.0029544		55.1119	71.7291
PGM2	60.9243	66.1637	54.3882	64.7267		31.8442	36.5093	32.7063	51.5792	30.5766	34.8609	30.5701		6.85162	7.83259e-05	0.000285449		54.1103	55.633
PHC3	10.0531	11.3633	7.3078	12.1912		14.437	21.4416	21.0524	18.7615	23.1458	27.3364	36.6114		-5.07136	0.00101557	0.00185542		10.8049	16.334
PHF14	21.3033	18.3931	14.1445	23.0396		31.2844	30.9756	36.7507	24.2912	27.9155	31.1188	41.5897		-4.0679	0.00847068	0.00903447		26.3376	19.4471
PHF2	20.9712	20.1934	16.4014	20.3693		31.0867	32.6976	27.551	29.5958	27.294	33.9437	20.2546		-4.49728	0.00165486	0.00292586		26.7868	36.08
PHF20L1	14.6927	14.8949	10.019	19.8817		30.8381	32.091	37.9007	40.5984	81.3504	33.8241	46.3378		-5.51828	0.00074027	0.00149861		27.6387	25.5029
PHF6	8.35903	8.61906	7.74357	12.1909		20.666	21.6408	15.329	19.9835	22.2364	22.5025	18.8707		-7.0251	0.00132278	0.00256904		9.96265	15.2834
PHLDB2	20.1472	48.1517	23.5352	27.4845		4.35428	9.33515	10.896	18.1382	4.97811	9.5006	15.386		4.02306	0.00356367	0.0051809		14.4777	10.9652
PHLDB3	9.18481	9.32783	6.9056	7.10308		15.293	17.0751	11.1919	11.3983	12.555	10.9453	10.9846		-4.24533	0.00384317	0.00545208		13.0844	9.84647
PIAS4	18.6182	22.9349	19.183	19.194		30.2899	23.4013	29.9415	20.5064	26.3283	27.2729	28.4362		-3.93023	0.00383425	0.00543781		26.844	23.1687
PICALM	82.008	102.838	75.091	101.19		37.9035	55.9548	44.6132	98.5869	54.1159	46.1919	63.59		3.48844	0.00687938	0.00790694		79.0446	117.337
PID1	59.0831	84.114	39.7551	66.2336		38.5984	39.2799	25.6846	35.5454	25.2839	32.3056	12.9917		3.51104	0.00856226	0.0091201		50.5461	21.2148
PIGU	22.6712	29.7543	30.308	23.6549		45.8453	44.4069	47.1961	29.4476	37.2763	42.0282	45.0725		-4.52099	0.00278852	0.00408192		25.5029	16.6062
PITPNA	34.1727	44.4513	39.4531	40.7052		53.6409	55.2652	48.0138	51.6314	60.7297	56.2349	42.2371		-3.94431	0.00582614	0.0070506		30.1616	40.6683
PLA2R1	13.3548	13.9098	16.3217	22.0823		2.61072	2.94042	4.0123	5.08329	4.28221	4.71439	1.36933		7.62173	3.33053e-05	0.000142725		8.04916	7.48837
PLEKHG4B	0.833393	0.725231	0.30803	0.335311		1.33674	0.585929	3.77492	4.56308	1.05637	1.58769	2.0853		-3.33294	0.00988366	0.0101905		1.58348	0.262439
PMS2	9.72205	6.54771	7.36301	8.33948		15.6547	17.5342	14.784	18.5138	16.6885	13.0161	9.42538		-5.1539	0.000828754	0.0015557		9.45551	9.79923
PNN	66.761	39.5248	50.5695	44.4113		83.2483	72.1079	118.061	89.2683	99.5927	66.6097	71.3401		-3.90596	0.00831547	0.00889174		44.2088	65.8509
POF1B	4.14303	5.55114	1.60671	2.23916		0.627283	1.28106	0.87672	0.270738	1.47568	0.598872	0.115556		3.76881	0.00462814	0.00603725		3.10868	2.10221
POGZ	21.5915	15.9514	13.7355	14.7938		26.43	23.5008	34.6246	28.0516	29.8982	25.3413	27.2233		-4.83922	0.00661992	0.00770713		26.5567	30.5516
POLR1A	14.5699	15.0254	13.3584	15.0237		15.6028	20.1582	17.576	21.1752	22.6231	16.1392	22.71		-4.32608	0.0024278	0.00379648		10.4596	22.0037
POLR2B	67.5414	72.7401	59.1592	58.9717		115.36	120.026	84.4791	95.8967	256.676	118.902	147.093		-4.61473	0.00201	0.00333976		58.8801	75.1307
POLR2G	48.607	42.4546	44.4151	32.0242		18.977	18.4196	27.2758	33.5396	29.1295	17.5799	38.4426		3.34774	0.00860415	0.00917719		26.6494	29.4407
POLR3A	7.71008	9.61335	8.52845	11.785		16.7549	13.5107	14.143	17.2603	16.0564	23.9707	28.2959		-4.78516	0.00113936	0.00221223		12.4211	22.4683
POLR3F	11.2208	9.28177	9.81034	9.45587		15.2064	14.6597	21.9379	15.3957	19.2949	15.6871	15.4004		-7.22354	5.0286e-05	0.000199814		10.9156	17.463
POLRMT	21.3258	14.3627	16.6899	20.2186		24.5328	29.0305	33.8769	25.6084	31.2145	21.4099	25.8965		-3.81397	0.0101979	0.0103475		17.3179	19.8119
POMT1	14.0895	11.3459	11.3634	14.1804		26.6639	16.4402	19.0811	12.4559	15.6262	22.2495	25.4674		-3.34373	0.00885454	0.00939128		21.7756	9.60389
POT1	16.3159	14.1344	11.3696	17.3109		20.387	23.5543	23.1384	14.9463	25.4347	22.228	30.4043		-3.44506	0.0101273	0.0103047		14.1957	18.2951
PPAT	13.7674	10.2039	6.48305	16.7448		23.487	20.6092	19.2289	20.7124	89.1795	26.8336	61.7194		-3.32499	0.00955277	0.00993363		11.4925	24.7927
PPCS	59.8844	45.0866	48.0866	52.815		31.9825	25.5209	36.2701	52.3744	30.2939	29.1361	42.4692		3.53852	0.00636231	0.00753586		51.1829	47.0004
PPIE	50.3983	46.3615	63.1559	58.8864		31.696	29.9091	32.7625	42.1121	27.8925	28.7084	55.4572		3.84719	0.00394528	0.00552344		45.6894	46.7776
PPIF	38.2537	36.7315	32.5406	33.826		45.6249	54.1391	67.9418	63.1573	130.926	46.447	84.3668		-4.30505	0.00379659	0.00536645		47.2276	39.3571
PPIL1	46.4784	35.4458	41.7444	42.4175		65.696	79.6074	53.1973	57.5425	71.7316	57.3663	77.7992		-5.55458	0.000463041	0.00107044		69.3542	59.318
PPM1D	20.6149	17.9165	15.8428	21.3963		34.5396	29.9888	26.6845	24.9945	27.2177	30.9575	39.6542		-5.17058	0.00114536	0.00225505		35.768	29.9927
PPM1G	142.312	118.637	114.866	125.232		169.996	173.924	142.602	158.661	179.449	152.49	172.459		-4.79045	0.00350806	0.00509527		164.238	157.859
PPME1	21.2118	27.0557	23.9835	21.2389		11.8729	13.2496	18.6271	22.8654	15.1158	15.4424	13.7347		3.97339	0.00324043	0.004767		17.2965	14.3576
PPP1R2	75.2796	64.646	70.085	64.4263		50.5207	40.1015	65.3888	57.396	52.4505	47.083	57.835		3.78609	0.0044222	0.00583744		70.9758	80.0641
PPP2R5B	25.7097	19.7661	29.5993	20.6147		11.361	13.781	11.8226	15.0692	16.3533	13.1187	18.1801		4.50829	0.00445758	0.00586598		11.7605	10.2867
PPP4R2	28.5762	29.9593	23.1404	32.6029		37.6922	41.1768	39.8111	48.5706	45.1437	37.8784	43.3343		-4.78252	0.00666531	0.00773567		32.3897	41.9797
PRPF8	116.797	115.051	131.022	119.395		151.35	133.373	156.197	172.616	167.784	151.564	164.373		-5.96106	0.000263628	0.000770713		116.477	156.078
PRR14L	8.43719	8.7108	5.52933	11.3792		10.0347	13.5936	24.6784	14.297	29.7157	15.4921	16.804		-3.47556	0.00903174	0.00951973		14.0019	32.9945
PRRC2A	104.609	102.784	125.662	126.689		140.448	172.599	210.89	148.253	166.151	136.783	185.074		-4.38612	0.00218031	0.00356812		124.226	130.094
PRSS54	0.202128	0.219025	0.465325	0.126924		0.799998	1.55857	0.696904	1.692	0.377609	1.3356	0.818382		-4.21823	0.00500806	0.00643688		1e-06	1.96037
PSMC3IP	2.56636	3.10443	3.38948	4.47112		4.8766	11.2135	6.85083	9.98232	10.8991	5.50289	5.29473		-4.45892	0.00169652	0.00299722		3.71826	3.02784
PSMD12	45.7168	50.4661	40.6031	40.2846		56.2444	53.7888	57.8701	45.2344	64.6253	53.1663	70.1093		-3.34649	0.0101379	0.010319		37.5372	42.6635
PSMF1	79.9794	82.3407	84.8338	66.2958		98.3805	120.703	142.265	104.962	124.279	106.756	148.011		-5.27267	0.000671574	0.00141297		90.8208	124.979
PSMG1	96.4163	78.5536	103.302	101.585		128.727	152.89	122.769	107.449	178.859	112.095	163.557		-3.74136	0.00490611	0.00635125		109.512	122.558
PSTPIP1	8.55591	8.85571	6.43439	11.8871		4.40297	5.33217	8.07146	1.88095	2.10509	5.29406	3.67009		3.39549	0.00804509	0.00869193		4.63603	1.14824
PTCD3	15.4346	13.3414	14.8189	16.4818		29.0022	17.2519	28.4045	32.1165	37.3052	21.9721	30.8771		-5.62017	0.00049014	0.00112752		15.9429	28.2475
PTCH1	6.93666	5.55355	4.26896	6.9926		16.7151	15.5882	9.19073	11.5322	7.9444	17.8352	14.2339		-4.75222	0.00141887	0.00266895		7.46494	11.9952
PTCHD2	6.35774	4.18166	8.21391	4.63836		2.31289	2.04144	2.42543	2.53778	1.23814	2.91448	1.29624		5.16242	0.00137867	0.00261186		3.16523	2.02709
PTPN12	103.003	127.621	110.629	136.366		62.6861	85.3691	67.2509	104.816	80.8445	66.7065	93.4555		4.20367	0.00255232	0.00386784		83.7219	75.7024
PTPRA	56.9062	54.2827	63.7	65.9521		104.982	80.6434	101.884	62.6374	82.9787	102.372	76.4244		-4.21733	0.00229359	0.00369657		54.4608	43.113
PWP2	17.8814	17.3962	17.7651	20.6856		24.6591	37.2048	30.2545	31.7967	30.5324	27.0214	31.3681		-7.85336	2.83119e-05	0.000128452		17.4435	27.5795
QRICH1	76.288	72.1839	60.2768	64.2865		103.976	97.9758	99.8525	88.3055	97.4343	100.868	62.9043		-3.54958	0.00639903	0.00757868		93.9626	81.4222
RAB10	154.205	156.594	137.306	161.027		183.905	187.438	152.623	173.63	260.683	206.284	194.274		-3.24359	0.0106309	0.0106758		115.03	149.973
RAB39	1.29735	1.40258	0.498821	0.252627		0.344456	1e-06	1.37147	1e-06	1e-06	1e-06	1e-06		3.81691	0.00796335	0.00860629		0.974845	0.388214
RABGAP1	23.3377	19.1664	15.93	20.7418		38.923	30.2681	41.7094	36.2684	47.0575	41.0892	25.1173		-5.45711	0.000590622	0.00134161		27.9083	42.4764
RAD21	111.565	100.473	91.5399	128.98		251.821	247.62	128.502	118.511	369.967	239.657	308.302		-4.0806	0.00348042	0.00503818		207.662	167.057
RAD23A	114.866	108.686	109.563	103.759		140.121	142.738	120.985	113.456	157.452	134.149	123.238		-4.07979	0.00329866	0.00488118		93.9178	112.155
RAE1	35.0268	29.9414	27.7076	35.7536		58.0316	42.8059	67.8623	41.1085	59.7842	50.974	56.0848		-5.49982	0.000461301	0.00105616		43.9878	38.6914
RANBP17	4.96194	5.61088	5.2379	7.30823		10.321	10.8256	6.18443	6.75381	9.18395	12.4817	11.4407		-3.68438	0.00531737	0.00665097		4.59162	5.96283
RAVER1	28.6496	23.2215	23.0821	30.5071		34.5364	33.9711	48.471	40.9213	38.1638	35.1738	32.6769		-4.03035	0.00658333	0.00769286		31.2036	27.3897
RBM26	16.2127	12.4389	10.4781	16.4671		27.3445	14.1817	29.2131	23.4442	30.0529	24.5912	18.1172		-3.496	0.00859093	0.00916292		18.0876	18.0165
RBM6	26.2184	20.156	18.7937	21.0391		36.6008	28.635	38.2849	35.1672	33.2043	29.6678	25.9675		-4.56878	0.00334594	0.00496682		27.9897	30.8221
RC3H2	6.04038	10.1983	6.02259	9.67191		12.5568	12.1266	9.92588	16.4173	15.6644	20.7672	21.4345		-3.67892	0.00945032	0.00979091		6.19136	13.0797
REXO1	18.2512	17.2506	16.0584	14.5096		23.3574	23.9406	33.1464	22.1695	31.9771	24.132	18.6316		-4.51951	0.00147529	0.00275458		17.0855	19.1575
REXO2	64.9435	71.188	55.5136	47.6863		28.5295	35.8192	34.3659	41.4791	41.4085	25.9928	42.0499		4.55834	0.00273889	0.00403911		46.1167	36.9371
RFC4	34.1782	26.2783	23.8092	35.7664		76.834	53.6589	49.7355	43.2797	101.337	54.9627	89.2903		-4.91045	0.000881574	0.00162706		33.3932	32.0603
RGS2	107.164	138.365	101.543	82.035		37.6886	20.6473	71.781	44.8073	32.8243	26.6663	15.7779		5.45481	0.000458096	0.00104189		436.458	86.028
RHEB	86.6747	97.1994	87.0899	82.541		59.7488	63.9623	66.3017	74.9525	82.4949	59.8634	46.1626		4.13432	0.0030381	0.00452437		91.2306	86.9017
RICTOR	6.62097	6.05681	3.93339	7.4391		9.1019	9.02443	8.2278	8.89532	13.7511	15.8401	20.7393		-3.49198	0.00838691	0.00893456		7.7708	15.973
RIF1	12.315	14.1389	8.86716	20.5936		32.0236	17.9442	29.0444	32.8228	33.115	43.9678	34.0897		-4.15248	0.00840566	0.00896311		18.2744	30.3681
RNASE4	267.878	268.429	460.064	141.263		77.0491	30.8971	32.3025	156.624	59.3285	56.211	20.5096		4.68042	0.00143553	0.00269749		135.141	114.105
RNASEK	207.369	194.328	215.238	157.559		124.014	111.637	139.373	142.592	172.357	128.835	134.614		4.08641	0.00604448	0.00729323		110.812	114.327
RNF11	112.148	121.576	137.736	140.016		80.5975	71.9951	63.938	111.697	84.4641	75.9615	70.7167		5.60109	0.000345217	0.000884893		76.3627	69.6699
RNF139	68.4903	56.8071	58.4741	44.4837		135.277	111.1	94.1388	63.2455	230.256	140.341	148.658		-4.41585	0.00179873	0.00315421		70.696	51.0641
RNF145	122.536	90.162	100.624	85.4089		214.023	147.831	145.75	162.047	159.853	223.674	90.8306		-3.39916	0.00788391	0.00853493		111.21	89.5805
RNF19A	42.948	37.9513	28.6571	50.3747		88.5826	131.745	38.1547	53.1786	90.2054	103.893	68.0113		-3.35191	0.00853158	0.00906301		43.6852	39.9307
RNF213	6.06129	10.6374	6.0698	7.3469		19.3996	13.1031	16.2309	20.1017	5.47858	20.5876	24.5639		-3.27503	0.00960817	0.00994791		9.50485	11.2602
RNF219	19.3251	15.4325	12.9494	20.2218		31.3716	15.1331	40.1745	26.3774	38.8258	34.7884	33.2242		-3.60586	0.00589597	0.0071505		21.3285	19.3054
RNF24	3.43733	6.08519	3.63604	5.32525		12.0901	8.84332	5.38718	11.0759	6.99334	10.0485	11.8513		-3.93138	0.00606652	0.0073075		4.26157	6.58427
RNFT2	4.84926	3.99124	3.8256	5.86444		7.09248	8.63938	10.3731	13.6979	7.72313	6.11122	5.50871		-3.71782	0.00499426	0.00640834		2.31185	1.61336
RPA1	40.4301	37.0545	45.6022	41.7061		73.0219	64.3261	44.4155	43.8921	63.4815	66.5965	68.5102		-4.12374	0.00287458	0.00423892		47.5994	41.3867
RPF1	35.3945	28.967	33.9984	32.3587		29.1155	16.961	28.7773	23.8595	28.1932	20.2391	22.5437		3.54162	0.00669092	0.00777849		36.2807	39.3505
RPRD1B	6.81242	9.53421	7.55597	10.7237		20.2044	19.3238	19.4127	15.6395	15.9665	21.6177	23.39		-6.8696	0.00118583	0.00232641		12.329	13.3035
RPTOR	12.8332	14.0517	13.2388	13.4154		19.7183	15.9665	18.3143	15.2349	19.7668	21.6682	24.985		-5.32166	0.00111588	0.00215514		14.6391	13.0455
RSG1	20.4663	14.4089	22.1622	19.1864		11.777	8.80724	5.67458	13.1675	5.36663	8.23705	10.4208		4.85154	0.000907007	0.00169842		11.5736	13.2343
RTKN2	0.468318	0.905876	0.816471	1.78559		4.49354	3.97397	5.80204	3.19602	6.25485	5.53805	10.0176		-5.80081	0.00286474	0.00422465		6.78971	3.46637
RXRG	4.49247	7.41894	5.81299	7.41191		3.56518	4.69055	4.21582	3.84683	2.74474	3.62044	2.37709		3.77661	0.00833299	0.00890602		5.58926	3.52287
SAT2	14.943	9.82844	15.1068	13.4393		7.05713	7.12167	2.11212	12.3417	2.59761	5.24901	3.37258		3.88457	0.00484427	0.00629416		6.13128	2.82289
SCAF4	20.1346	21.0959	16.715	18.4255		30.1098	41.5784	27.4156	26.0699	28.3575	28.2485	29.0731		-5.78778	0.000317033	0.000799258		24.4243	25.9119
SCAI	1.20553	1.32091	1.24633	1.66458		2.83257	2.8434	2.52928	2.12746	3.74493	2.28937	2.78137		-6.89875	0.000147232	0.000499536		1.86695	2.6595
SCARB1	168.878	108.56	140.024	128.559		237.943	213.338	241.568	225.653	391.519	215.198	298.098		-5.1299	0.00112097	0.00218369		368.577	312.101
SCFD2	11.8515	12.219	11.2547	12.163		31.8135	28.1086	12.9667	17.9247	48.3147	23.1845	25.6094		-4.65074	0.00325764	0.00478127		17.6232	17.5264
SCRIB	38.6194	33.281	33.5437	42.9898		72.019	77.3285	71.7516	61.8854	92.9696	69.9099	168.922		-5.7404	0.000391455	0.000941982		43.5892	66.2214
SDF2	154.481	149.673	141.198	126.572		259.223	150.674	189.176	153.925	241.579	195.429	208.603		-3.57453	0.00635915	0.00752159		135.391	111.089
SDHA	142.963	136.686	133.416	123.532		178.056	157.914	185.885	178.82	245.539	148.389	226.079		-4.3796	0.00235072	0.00372511		155.117	145.451
SEC14L4	93.3507	101.157	404.825	359.429		9.62283	16.4973	16.216	37.7757	49.3884	8.48862	6.20735		5.07831	0.00204169	0.0033683		9.49841	8.51538
SEC61B	121.531	99.7933	134.168	96.1355		87.7981	95.9817	64.9155	87.4486	64.9044	68.7243	79.6566		3.65171	0.00952228	0.00987654		70.2314	88.7173
SELS	89.8329	92.8386	89.4788	70.0852		44.8167	53.6438	54.1444	64.0639	46.6368	50.3437	68.9105		5.13213	0.00108154	0.00201242		71.3958	89.5238
SEMA3C	204.077	193.641	154.074	107.113		7.14194	44.0491	28.4285	51.1292	12.4623	10.3491	37.134		6.05361	0.000262683	0.00075644		101.478	75.2026
SETD1A	14.2912	13.1818	14.9313	11.7636		17.3351	21.6428	24.1329	22.1902	23.5723	17.7571	14.6036		-4.39298	0.00174424	0.00308285		20.2914	23.4595
SETD4	13.2319	10.8836	9.85196	7.46053		19.4217	32.9286	52.3986	45.3491	14.7273	14.9872	18.8658		-3.91044	0.0037107	0.00529508		13.1758	11.9509
SETDB1	29.2261	24.5008	25.7995	27.4092		45.4868	31.7807	41.9588	40.0653	32.044	38.4683	39.054		-5.64876	0.000318823	0.00081353		44.3393	54.8488
SETX	14.2534	14.5418	12.0973	18.1779		22.67	24.0199	18.8554	20.861	20.9088	27.9503	26.6953		-4.541	0.00488216	0.0063227		14.5945	24.8916
SFTPC	1.43366	0.39785	0.406919	0.215581		1e-06	1e-06	1.3155	1e-06	0.219092	1e-06	1e-06		3.75902	0.008564	0.00913438		1e-06	0.339254
SGCA	35.0867	20.797	35.6583	20.3322		4.63838	7.26063	20.7201	16.4341	18.947	4.40731	5.622		3.56544	0.00625983	0.00747877		13.4204	11.7721
SGTA	24.1726	28.0206	26.4043	26.3063		38.2935	30.7316	34.0886	32.1342	50.3789	36.5083	41.9583		-4.95836	0.00104305	0.00192678		38.5489	27.1313
SHROOM1	11.8051	13.259	14.2227	8.18755		7.8746	10.3741	7.37175	5.00751	3.33238	4.93266	7.42781		3.28821	0.00985995	0.0101763		7.20034	7.23593
SIAE	38.0556	27.4418	30.5456	24.3854		22.986	20.2951	11.0292	21.8287	10.6336	16.2325	10.785		4.01992	0.00301898	0.00448155		20.7264	28.7921
SIRT1	23.1083	17.7713	17.954	16.9727		29.3467	31.4944	27.1716	21.7124	30.8541	31.6878	34.1597		-4.91928	0.00190245	0.0032113		25.3277	30.7421
SLAIN1	8.68003	5.76074	6.56712	4.62489		13.1867	10.4304	9.26119	13.7431	30.6556	11.4311	13.8601		-3.93551	0.00380929	0.00538072		5.55777	3.96451
SLC12A4	29.9967	41.7768	42.7145	34.26		12.6844	14.7343	23.893	17.3631	14.1523	20.032	9.04301		5.96756	0.000210785	0.000670806		27.8777	16.7517
SLC25A37	23.2042	21.5083	17.5776	23.73		72.9818	26.1904	88.4699	49.6785	59.5976	68.6896	46.8769		-5.78137	0.000404594	0.000970527		42.0261	46.7676
SLC25A41	4.20041	4.27012	4.00157	5.16251		7.6325	7.04807	19.2853	9.53274	9.57995	7.35042	4.12757		-3.51428	0.00949387	0.009848		4.66039	5.26906
SLC26A2	11.1618	14.6348	20.608	14.6569		20.902	43.8284	14.9492	71.8547	39.6784	25.9654	34.0841		-3.29022	0.00947396	0.00981945		22.7921	50.4632
SLC2A10	26.374	20.9277	24.9889	21.4391		2.2562	6.68655	4.67721	21.2928	8.4154	4.6864	1.34514		4.47429	0.00369637	0.00528081		10.9931	6.71975
SLC2A9	37.2669	44.9631	18.4305	21.746		13.4731	3.48216	14.7454	17.3183	8.87253	11.4725	11.3482		3.43945	0.00941539	0.00977664		19.5241	20.4509
SLC35G1	22.7938	16.2572	16.3002	16.9336		27.2741	24.7225	25.3672	24.1368	33.678	30.2436	30.1439		-4.67378	0.00531368	0.00663669		12.2921	22.9044
SLC39A9	24.6832	35.0047	21.6338	32.8938		42.0172	41.375	29.9029	46.2014	60.9373	53.538	84.9619		-3.27863	0.0104508	0.0105616		30.0638	37.2852
SLC45A1	3.72066	7.14786	4.72535	2.09399		0.649272	0.926121	0.361215	0.269954	0.282509	0.771215	0.139719		6.33539	0.000223959	0.000685078		2.80666	1.07518
SLC4A11	4.84921	4.43604	4.8291	9.41662		15.1496	15.0294	15.2672	7.69692	6.73141	16.4879	32.5062		-3.42499	0.00812721	0.00874902		3.76183	2.16596
SLC5A3	4.05409	2.47201	1.72026	3.88657		5.42341	3.26586	30.4294	7.88106	14.5875	9.60922	13.544		-3.57904	0.00595991	0.00720759		2.79787	7.73733
SLC9A8	5.94119	8.17215	5.70608	7.11343		12.3243	7.60096	14.5644	11.3577	10.0996	16.0069	19.0426		-4.41017	0.00169609	0.00298294		7.0186	11.3527
SLMO2	45.2347	35.3707	35.8013	51.0727		45.3597	52.9791	87.3094	60.0657	104.93	65.5314	87.2122		-3.51907	0.00663429	0.0077214		44.1169	62.2856
SMC6	34.8	27.2409	25.6172	30.5195		38.3087	47.8186	53.0635	38.6947	66.2538	41.3353	60.8434		-4.6901	0.00119444	0.00234068		44.8749	51.3881
SMEK1	50.1828	36.8722	32.7961	42.0766		70.9289	72.2432	66.0999	59.9756	67.8052	66.0873	50.2063		-4.63205	0.00678868	0.00783558		51.5921	57.4871
SMG1	10.127	10.2579	6.99288	15.0666		16.2673	23.0672	17.747	30.279	20.9852	21.9906	22.925		-4.26998	0.010273	0.0103903		15.2702	28.6494
SMG8	16.4059	12.5957	12.1269	13.7738		22.0272	19.2586	23.9169	18.971	31.8367	25.548	25.3438		-5.69247	0.000445441	0.00102762		16.9807	15.9565
SMYD5	16.6167	13.7208	16.9253	14.1401		28.5694	23.3742	27.2522	19.3444	31.5276	26.6538	29.904		-6.57512	0.000121166	0.000413901		17.5656	19.1826
SNRNP200	83.0717	78.3812	75.2579	80.1148		126.348	103.279	89.6364	112.579	99.3511	118.68	108.691		-6.42377	0.000184211	0.000513809		89.5372	110.52
SNX11	21.1723	17.7628	16.8964	19.4616		26.5773	32.4795	38.0986	25.9454	32.2799	25.3788	27.3487		-5.92226	0.000262387	0.000742168		23.4652	21.8269
SOCS7	5.00669	7.64677	3.65025	6.33694		7.38484	9.51234	9.25696	11.9259	10.3778	14.4473	26.5724		-3.42284	0.00916917	0.00961964		5.63861	10.2733
SOX15	5.97713	3.97231	4.17951	2.62989		0.438457	0.321207	4.39312	2.91237	0.297065	0.46153	0.47642		3.78142	0.00575746	0.00700778		1.5712	0.924354
SPAG1	7.41981	6.06583	9.21325	6.84487		13.3149	13.7244	9.41039	10.1361	18.4698	11.2381	7.85112		-3.35333	0.00875137	0.00930564		5.47619	9.03636
SPCS3	116.383	152.187	106.334	104.017		45.4093	60.0843	55.2981	76.6472	53.8473	51.6415	64.2477		6.6827	0.000488308	0.00109898		70.6745	89.8745
SPG20	33.5923	39.3108	33.358	35.1119		41.8576	49.3255	51.6668	55.7261	39.3777	48.2755	45.6789		-4.90127	0.00091536	0.00171269		73.1747	65.5406
SPNS3	7.25786	3.93167	11.1376	6.21291		2.67039	2.0966	1.97352	1.91834	1.20111	2.1139	1.54246		5.37174	0.00488773	0.00633697		2.43059	0.784554
SPOP	29.2859	26.426	25.1201	33.4495		53.7634	42.6543	30.8055	29.9965	45.8942	48.833	46.036		-3.60107	0.00575338	0.00697923		38.1751	42.9487
SQSTM1	451.683	554.995	346.947	377.606		227.097	305.743	197.03	263.262	139.953	246.777	285.454		4.21963	0.00309807	0.00461001		235.935	129.608
SRCAP	40.427	40.5448	36.7912	44.2716		45.5764	56.452	52.0136	70.4086	53.9291	50.1273	46.4559		-4.05903	0.00285215	0.00421038		49.2106	58.4603
SRD5A1	10.1227	6.26465	9.94064	14.37		29.3904	21.6014	10.5309	19.4203	22.858	24.705	30.9391		-3.67342	0.00862982	0.00920574		7.45267	13.3748
SRRD	6.00388	6.61595	6.94802	10.0815		9.51069	10.3312	11.0071	21.0939	13.5308	14.6673	10.7283		-3.54179	0.00839946	0.00894883		12.7302	13.1279
SS18L1	2.88201	2.36359	1.86392	2.39278		3.59533	2.47971	7.14839	4.97122	4.41754	2.96612	4.41902		-3.44486	0.00735242	0.00823521		3.64521	3.02439
SSBP3	45.4353	45.9805	38.5624	50.8184		25.9665	28.9468	52.279	32.9962	26.6154	26.5409	18.6114		3.35357	0.00962661	0.010005		62.5713	35.9167
STIM1	63.4865	70.5484	63.9074	78.4677		41.298	50.229	40.5136	75.1126	36.6114	40.7061	41.4589		4.01973	0.00333088	0.00495254		47.1788	36.8101
STK35	7.68923	7.30983	6.4608	9.27113		14.1693	11.2575	20.5004	13.5285	16.562	14.9363	16.5608		-6.63312	0.000192719	0.000599443		9.06171	8.05433
STMN1	90.0966	78.074	73.3789	172.805		216.973	455.693	283.587	244.194	225.509	165.153	261.1		-4.17909	0.00797089	0.00862057		552.694	282.029
STRBP	21.0266	24.6701	24.3484	21.0229		48.3377	37.4303	28.1867	38.0679	51.2647	40.9474	54.9138		-6.28945	0.000190855	0.000570898		29.8849	36.3952
STRN4	39.29	35.1046	36.6819	35.8108		65.8096	52.2946	56.2197	53.1576	50.8566	55.4224	50.2726		-9.39124	6.02036e-06	2.85449e-05		52.9318	57.0223
STX16	39.7229	29.9354	28.8717	25.6345		61.605	39.76	75.3742	49.527	52.385	59.2556	58.6531		-5.00087	0.00170462	0.00302576		39.4532	56.6226
STX18	16.5062	14.483	15.9721	15.4868		11.8014	13.7636	11.7246	13.1267	8.56499	11.3484	13.6258		4.03785	0.00371785	0.00530936		11.4559	11.222
STYX	4.11114	6.33359	3.40643	4.76311		6.14741	10.9753	6.2174	6.99417	13.2775	10.9522	7.38927		-3.54789	0.00849187	0.00904874		4.76957	4.65391
SUPT6H	33.104	37.1583	33.5633	30.1636		44.5441	38.969	43.3298	50.6265	42.4808	42.999	43.9144		-5.193	0.0021765	0.00353957		40.3805	49.1075
SUPV3L1	9.54515	8.45137	9.01216	10.0029		10.1702	13.7653	14.6959	14.9767	14.0852	10.6601	16.6262		-4.76455	0.00119967	0.00236923		11.6485	10.5711
SURF6	17.8629	13.9098	13.0061	16.091		21.3086	22.0953	26.9089	25.9402	24.0711	20.5959	25.6046		-5.49892	0.00287566	0.00425319		31.8067	36.5021
SUZ12	16.725	12.6581	10.591	17.6766		26.3267	24.0472	26.9641	26.299	32.5838	25.777	33.0768		-5.23184	0.00683193	0.00786413		22.5077	35.5999
SYNPR	1.51795	0.317474	1.32079	0.611448		1e-06	1e-06	0.230814	1e-06	5.07026	1e-06	1e-06		3.68192	0.00962551	0.00999072		1e-06	1.18118
TAB2	64.816	68.0325	50.7071	65.2783		144.627	91.8961	76.7092	99.5652	121.651	150.276	90.218		-4.72731	0.00107898	0.00198387		66.387	65.1247
TACO1	9.86642	7.73601	7.46	8.69343		15.3223	12.9095	9.94185	15.2358	11.809	11.9254	19.4263		-4.55279	0.00139632	0.00265468		7.0357	14.1421
TAF11	31.8298	25.7666	35.2612	33.9887		59.6601	43.0387	50.8364	30.5667	47.2307	54.7775	71.149		-3.6805	0.00507527	0.0064797		41.1432	29.3506
TAF15	69.737	58.6332	61.6144	67.4942		102.522	85.0127	77.7496	72.1182	88.1408	98.8863	109.997		-4.75934	0.00103157	0.00191251		62.4903	58.5951
TAF2	19.0853	22.2188	13.7547	23.7272		36.9617	36.8401	37.5848	25.9231	110.409	44.8478	53.8812		-3.97447	0.00323284	0.00475273		22.0812	19.6362
TAP2	55.0054	50.4051	51.607	39.4106		94.6254	80.5252	56.6719	54.8728	61.1187	82.592	75.1159		-3.47338	0.00779436	0.0084493		85.6939	84.4994
TBC1D1	94.3878	62.0825	45.1386	78.0393		26.6932	24.9891	32.8056	54.8264	20.3607	33.2529	34.3013		3.91281	0.00715791	0.00809249		68.3319	35.1581
TBC1D13	22.3363	22.8001	16.2582	16.5669		30.8808	20.7641	29.188	24.3509	40.3678	30.5572	41.6899		-3.43549	0.00864663	0.00923428		27.3348	41.1279
TBC1D20	23.336	25.7836	23.5304	19.0139		30.8785	33.1079	34.6905	27.4216	41.8862	34.1614	29.8256		-4.4692	0.00329572	0.00486691		28.1023	48.5898
TBC1D8B	4.01329	4.13239	4.31724	3.51355		4.87304	5.59925	7.30259	4.90869	10.1496	4.85416	6.41406		-3.76017	0.00570735	0.00690787		3.46286	3.51484
TEC	4.89395	6.65063	2.25398	6.23244		16.8224	25.7921	14.1166	6.42182	27.7549	14.1432	16.0404		-3.99002	0.00672568	0.00780704		3.87236	3.40344
TFAM	19.5715	16.0464	12.5015	15.886		34.7013	23.4057	22.6311	20.6897	34.1348	33.3377	37.599		-4.57352	0.0017614	0.00309712		24.2977	27.2471
TFAP2B	106.002	158.289	60.657	31.4284		20.1608	35.2322	12.9666	40.7396	7.93141	15.1374	2.19318		3.29215	0.0103964	0.0104903		70.1722	29.9092
THG1L	7.16121	6.75487	7.74664	6.4054		9.10449	13.589	19.9279	10.5817	16.7894	8.92897	12.2388		-4.76516	0.00177453	0.0031114		14.2684	11.9918
THUMPD1	15.1671	15.206	11.139	14.8428		16.9873	26.7204	23.9024	21.5743	37.2703	22.5809	25.0522		-4.68346	0.00124027	0.00245486		14.9739	23.7969
TIPARP	51.5191	50.4493	44.6984	41.2615		13.9429	30.959	39.1967	29.5743	38.7221	18.0959	30.8071		3.49034	0.00931442	0.00970527		20.4582	44.1327
TKT	623.731	549.629	597.812	706.277		267.154	354.059	411.539	467.742	607.222	248.858	319.603		4.00854	0.00396545	0.00553772		510.248	494.796
TM2D2	42.6782	45.5338	40.7713	40.3117		26.2831	19.0246	21.9583	41.1275	21.1034	21.8407	13.6368		4.9008	0.00210966	0.00343966		34.3418	29.6875
TMEM101	42.6584	35.4457	34.0791	37.6486		88.1587	58.9737	66.7872	47.108	71.1481	68.8391	91.3659		-6.17896	0.000188178	0.000556626		55.1728	61.3181
TMEM128	63.2646	80.9232	70.0773	54.1996		37.9741	41.7742	35.4049	55.9586	29.2767	43.767	53.6877		3.86819	0.00462289	0.00602298		75.1962	62.1208
TMEM134	37.4499	24.8498	38.2685	26.176		11.0113	23.4883	13.8168	30.5527	14.9621	11.7695	15.9244		3.56469	0.00627757	0.00749304		30.3006	34.6964
TMEM164	25.1466	29.2248	24.8324	29.5156		38.1886	72.1199	37.9754	51.9249	49.1714	33.3974	30.2237		-3.76111	0.00584017	0.00709341		33.6813	61.6766
TMEM185B	87.5352	80.131	91.011	108.621		169.626	123.263	110.355	101.713	149.243	149.507	127.168		-3.85735	0.00442819	0.00585171		91.1647	138.809
TMEM199	23.4041	26.3084	19.7417	29.0145		32.1641	28.3242	35.5782	32.2945	42.4492	38.5845	52.9449		-3.60039	0.00741469	0.00827803		27.8522	32.6895
TMEM33	50.644	64.3716	37.05	49.4943		90.4191	103.91	55.1778	84.403	207.109	109.758	197.235		-3.79767	0.00430476	0.00572326		49.7017	81.7727
TMEM57	28.5347	27.7747	24.9601	25.371		28.0843	42.1301	34.2894	34.9901	32.5709	31.0893	31.3386		-3.82908	0.00403793	0.00558053		32.4786	31.6815
TMEM63A	38.3213	46.7114	30.5273	46.4464		21.1096	19.1821	19.2369	46.5448	20.439	23.0908	22.8802		3.43508	0.00784688	0.00850639		27.7284	15.3912
TNC	97.3867	87.5701	41.4963	172.844		6.15898	41.5528	14.4577	30.0708	65.7842	23.2765	7.60099		3.36493	0.00895256	0.0094341		48.6505	34.8864
TNIP2	16.172	19.2083	26.0994	18.552		8.49194	10.6859	14.5394	18.6436	7.80731	13.136	11.3913		3.44796	0.00782892	0.00847784		16.137	12.0138
TNIP3	12.6876	11.1702	6.92801	19.2564		0.66795	4.43141	2.79437	6.01817	6.50227	0.786946	5.46145		3.38396	0.00845295	0.00899165		0.695719	0.582545
TNRC6C	13.0726	16.652	9.41783	17.6483		29.5645	29.8975	29.5764	25.31	30.4591	37.0242	29.4129		-5.22402	0.00898705	0.00947691		15.0667	13.4424
TOMM34	16.0094	11.7621	19.0592	16.4133		29.3761	29.8609	41.3263	17.3755	33.2699	26.0722	41.9787		-4.34511	0.00210506	0.00342539		26.764	26.0417
TONSL	1.94753	1.18309	1.61936	3.18073		6.87683	7.43655	7.54747	3.56415	20.6342	5.99366	11.5428		-4.959	0.00110726	0.00209805		3.84788	2.92702
TOR2A	39.9549	34.2141	32.63	31.3386		56.3093	60.6982	56.2952	45.7123	71.2229	52.2026	51.4928		-6.45618	0.000200073	0.000627988		49.374	47.935
TRA2B	26.1701	20.5435	22.6379	27.102		32.9054	40.8735	32.8766	28.0063	32.8849	30.5468	31.7962		-3.97825	0.00795013	0.00856348		30.6601	33.556
TRAF4	65.4421	52.0158	69.3285	51.2422		142.981	66.7398	156.358	101.26	112.971	126.276	151.712		-5.09268	0.00065269	0.0013987		133.742	83.1193
TRAPPC1	71.3789	81.4973	87.2658	84.4716		50.2167	56.9635	55.7233	84.9221	55.6341	57.9515	76.4968		3.22204	0.0107084	0.0107186		63.1102	76.6636
TRAPPC6A	12.6173	8.94988	11.0895	11.9992		18.4538	31.3908	21.2288	20.6338	11.8794	16.5546	25.8682		-4.21931	0.00228276	0.00368229		44.7768	35.6538
TRIM3	17.3679	21.1471	15.8895	12.5775		9.2607	12.4818	15.4547	10.4949	8.45484	7.6424	7.46254		3.46624	0.0090798	0.00957682		16.6483	10.3808
TRIM37	13.2007	13.3216	11.5478	15.3839		21.8232	16.8543	17.9391	22.4377	21.9049	21.1018	26.1052		-5.66207	0.000551815	0.0012417		16.5292	21.3989
TRIM45	19.757	13.4092	12.5481	13.3629		36.8921	36.2712	32.8916	18.1198	28.3637	25.0997	20.0347		-4.24729	0.00269888	0.00401056		20.0347	15.3783
TRMT12	15.5369	9.06745	14.1223	10.821		24.984	25.0004	17.9783	18.0883	50.0312	20.1747	24.0719		-3.83956	0.00456042	0.00593734		15.1734	12.6112
TRNT1	38.9423	37.3269	38.9662	35.16		75.178	65.4237	42.5118	58.5394	63.6964	67.4563	44.9026		-5.25683	0.00117029	0.00229787		44.5505	51.1618
TRPM4	17.5218	11.7075	9.11703	12.4451		54.8214	54.6437	37.3252	26.7981	31.9966	38.702	14.52		-4.62933	0.00126476	0.00249768		12.1847	20.1258
TSC1	6.2996	8.57177	4.45707	6.54451		12.601	13.8221	13.1217	12.6391	13.7236	16.9649	16.9774		-5.67488	0.00551013	0.00677942		10.7601	14.3039
TSEN54	15.6142	9.54329	13.7015	10.3215		23.637	26.6675	17.0858	21.452	25.445	19.0607	36.6228		-4.50061	0.00303224	0.0045101		15.2471	20.0118
TSG101	61.3474	78.691	68.9834	61.6825		35.8773	35.2828	48.8282	56.4566	40.6305	36.8756	57.252		4.37667	0.00178419	0.00312567		61.3558	58.4044
TSN	59.5932	57.1799	51.8091	64.593		102.365	60.1849	72.224	69.3569	105.856	98.0545	85.3152		-3.78358	0.00466716	0.0060658		65.1649	86.4741
TSPAN11	11.0661	22.078	24.134	23.5922		4.53683	3.68095	11.3941	12.3495	4.45452	11.9433	3.44976		3.80659	0.00438747	0.00579462		16.2532	8.8614
TTC3	29.6717	32.212	27.8552	44.998		58.3367	61.2805	92.2359	60.5244	111.675	77.8809	85.169		-5.86964	0.00054556	0.00122743		40.1169	49.9587
TTI1	15.972	14.7551	12.6891	17.6392		25.4291	26.5792	27.2448	24.1796	28.8059	23.4264	24.6512		-7.0632	0.00219873	0.00358239		16.883	24.0178
TUBB2A	8.01169	15.4195	17.5402	8.03052		2.69594	6.04395	4.46143	7.00655	4.83949	1.69339	5.3053		3.59446	0.00798403	0.00864911		3.96596	0.70329
TUBB3	115.387	48.6864	112.304	42.3903		2.49046	17.7893	15.733	27.5981	6.45646	4.2292	1.56357		4.78185	0.00101299	0.00184115		3.31945	4.7643
TUSC3	138.489	183.5	137.893	112.882		77.3128	58.7072	71.9542	95.5353	85.2917	77.3077	51.7805		5.18721	0.0014537	0.00271177		104.827	63.7802
UBA2	49.5291	42.545	53.6837	57.718		76.5261	62.6665	83.153	60.7927	112.548	79.1756	58.095		-3.53699	0.00637534	0.00755013		57.4723	61.3692
UBE2N	0.464793	0.509807	1.08162	0.565472		1e-06	1.84424	0.384009	1e-06	1e-06	1e-06	1e-06		3.73026	0.00953339	0.00990509		1e-06	1e-06
UBFD1	24.079	18.1549	24.2165	24.3429		34.1942	24.6283	37.4668	35.9862	46.919	31.4829	30.0435		-3.87853	0.0044048	0.00580889		26.4588	25.7756
UBR5	20.9257	27.1462	16.6105	26.5428		32.6486	34.2536	27.5762	34.3399	70.2021	43.4801	44.4354		-3.44654	0.00874205	0.00929137		24.6929	31.7779
UBTD2	29.4619	24.3715	21.7733	35.2432		32.826	49.8	55.0801	35.7292	48.0164	46.6295	49.4871		-3.86032	0.00895447	0.00944837		99.9865	56.9947
UBXN11	4.91725	4.08803	4.72943	2.98327		2.08636	3.29571	3.15056	2.95354	1.27982	1.81882	2.56942		3.25893	0.0104416	0.0105331		4.12556	3.40096
UIMC1	7.64466	5.87837	8.90256	10.0209		14.1252	15.1222	15.9449	8.56276	15.3901	12.9167	14.1016		-3.76603	0.00954253	0.00991936		10.2163	8.79902
UNC5D	1.47453	1.47153	1.10387	0.490991		0.049653	0.89718	0.258093	0.823172	0.119371	0.0431024	0.033265		3.3312	0.00981708	0.0101335		0.984332	1.14872
UNK	17.0025	17.3497	19.4883	15.5523		24.7629	23.4429	38.4475	20.9986	25.5654	23.6647	30.5094		-4.67763	0.00121489	0.00241205		25.4396	19.185
UPF1	35.6129	38.3788	27.3535	42.2219		59.4983	66.1298	39.5706	66.7621	52.3369	58.9485	45.1879		-3.6288	0.00912356	0.00959109		57.6333	71.9065
UQCC	15.7957	15.6708	18.127	17.1201		25.71	18.9214	38.8642	23.1356	32.9479	22.0715	32.5749		-4.65122	0.00203777	0.00335403		17.1585	21.75
URB1	7.60554	6.66947	6.24283	9.85907		13.8321	23.4488	10.1706	14.0492	14.4663	13.4742	18.5355		-4.8833	0.00124569	0.00248341		8.5147	13.0477
URB2	31.1608	30.3725	23.3456	26.4743		33.1862	40.6294	36.762	49.599	58.5802	38.5823	44.5486		-4.3302	0.00222884	0.00361093		28.2439	45.3367
USP16	34.2515	32.1539	34.2174	33.7474		34.0958	63.42	44.5399	53.5361	52.9156	36.219	59.151		-3.88519	0.00734149	0.00820667		48.2063	75.2082
USP21	16.8955	10.7507	14.6122	13.0463		22.7602	14.3763	32.6469	20.9328	18.9811	21.7399	43.4371		-3.26232	0.00980622	0.0101049		21.2847	18.4438
USP36	13.5206	13.8232	11.8895	14.0675		24.3316	24.2867	19.5553	24.7573	31.2706	31.2801	32.0244		-8.66011	1.56084e-05	7.13623e-05		14.4431	25.4575
USP39	26.0184	18.1124	19.5421	27.7172		50.2439	40.937	32.9987	32.4879	39.8481	44.6483	44.1943		-4.83113	0.00459115	0.00599443		25.9035	28.6327
USP42	5.89409	6.36756	3.64983	4.66972		6.80857	14.3804	10.9189	10.091	13.1803	7.80579	5.69834		-3.43906	0.00853268	0.00907728		7.75599	8.34288
USP44	1.16604	1.03061	1.20607	0.909888		1.3811	3.77223	4.69427	1.39301	2.53117	1.68231	2.07795		-3.8808	0.0054777	0.00675087		0.456759	0.893164
USP46	9.19721	6.19044	14.0889	6.11342		13.867	18.0732	17.4251	21.5805	43.91	12.8519	32.466		-3.50943	0.00963958	0.0100193		9.91796	17.5205
USPL1	11.7153	9.70755	13.2441	8.75989		16.4091	17.8498	24.8783	19.1611	17.098	17.4525	14.5384		-4.61206	0.00399676	0.00555199		15.5254	16.7617
UTP23	26.2177	28.5639	26.6258	19.4395		42.3489	49.4752	37.4633	27.294	95.8774	38.0103	51.4826		-3.52173	0.00681539	0.00784985		26.3302	31.7455
VAMP3	61.773	55.3977	57.8922	50.0782		44.4988	38.0598	37.1359	58.136	36.1628	43.1719	48.7077		3.37268	0.00823224	0.00879184		65.5119	52.7624
VANGL2	10.9843	13.1084	7.33016	12.4799		22.19	22.1095	54.185	31.6951	23.4484	17.4474	44.3403		-4.78619	0.00108039	0.00199815		12.1108	17.4725
VEZF1	77.3647	60.185	42.2593	61.3107		106.927	122.927	80.9179	108.739	114.85	114.957	123.081		-4.54965	0.00945302	0.00980518		82.2739	127.289
VIPAR	2.45694	2.57276	2.12334	5.09739		7.32392	10.8947	6.19621	6.529	10.1599	7.11788	9.90038		-4.84531	0.00715605	0.00807821		4.15429	5.36429
VKORC1L1	11.3395	13.67	10.5405	21.9142		22.2427	41.3556	27.5787	22.6971	44.0105	33.7411	30.3458		-4.15671	0.00769155	0.00843503		23.3375	22.0258
VPS13B	12.1403	14.8998	12.3391	15.5953		23.1688	27.1159	24.589	21.3609	44.2042	31.935	26.5774		-6.29693	0.000141587	0.000470991		16.8605	24.4158
VRK1	6.63324	5.72506	5.27784	10.876		15.4556	16.2339	11.329	12.0581	22.9543	13.3067	12.1324		-3.98523	0.0103917	0.010476		9.02787	11.2683
VWA1	220.516	311.857	282.955	327.557		47.7543	62.5318	100.046	161.167	159.612	59.4923	54.0241		5.81021	0.000392656	0.000956255		89.5056	58.6501
VWA5B2	2.90974	2.05396	3.42609	2.03535		7.18621	4.61559	4.71204	2.57063	5.61263	6.72827	9.62932		-3.73658	0.00481819	0.00627988		5.2608	2.88032
WDR3	22.6089	23.736	19.4091	28.654		30.8754	33.5258	34.5888	38.6919	56.8847	31.4587	45.9418		-4.15425	0.00296016	0.0043531		25.0728	34.0805
WDR4	12.5795	10.7197	14.8152	11.6667		22.2825	28.0808	19.5822	20.7266	31.6162	21.8656	30.7016		-6.76417	0.000113479	0.000385357		10.9754	15.8401
WDR44	6.73903	8.11311	5.39329	7.4009		9.37549	10.3549	20.2324	10.3016	13.0456	12.4006	7.14232		-3.33316	0.00875626	0.00931992		8.8977	6.813
WDR78	6.37674	6.21723	6.79902	5.23901		3.27057	2.4922	3.06394	6.31397	2.38383	1.8425	2.56482		4.74153	0.00172023	0.00305431		6.07421	2.04082
WDR81	12.1443	11.118	11.2157	11.8313		14.1595	14.8174	16.7661	16.9583	13.3663	16.9343	14.9965		-6.77771	9.18478e-05	0.000313994		17.8862	17.8158
WDYHV1	12.0967	14.431	7.38773	9.54418		32.5596	17.8315	31.9834	15.2395	99.6213	24.414	47.4794		-3.93922	0.00353448	0.00510954		16.1924	19.6054
WISP1	6.26845	10.3085	9.9718	16.7567		1.59087	3.57302	1.14435	1.63082	2.04999	8.87539	2.15674		4.47835	0.00157299	0.00285449		1.76948	1.95706
XRN2	34.3811	41.4984	25.1672	35.0882		48.624	51.1858	75.1234	51.4239	68.0786	53.212	41.9643		-3.79929	0.00855893	0.00910583		42.479	55.6849
XYLT2	15.2684	18.4838	13.7784	14.2021		22.591	23.5262	21.848	27.7548	15.9482	24.7583	36.9166		-3.87652	0.00375639	0.00535217		15.9681	19.5293
YTHDF1	110.983	96.1798	87.7202	93.7095		161.936	128.255	212.056	156.217	206.839	156.554	160.637		-6.58052	0.000103014	0.000342539		130.771	153.589
YY1	56.5897	49.5211	52.2258	49.6069		70.107	84.0075	64.7901	68.2133	75.6902	77.7299	69.7231		-7.31914	6.61661e-05	0.000242632		74.7803	72.638
ZBTB10	22.5644	19.7391	14.4487	13.4101		30.1934	36.1953	37.0532	40.7474	22.6298	38.9749	20.9946		-3.7883	0.00714007	0.00804967		29.5349	43.6744
ZBTB12	26.0897	13.5771	19.2654	31.0133		42.4677	51.6874	68.4536	39.1156	43.1791	40.631	85.3675		-4.04051	0.0085564	0.00909156		39.5931	44.3137
ZBTB26	11.8195	10.8913	9.31256	10.1311		22.4523	16.5718	22.5644	19.5998	23.6057	22.4251	13.7104		-6.9055	7.1386e-05	0.000256904		13.8531	23.2198
ZBTB43	5.38565	7.53514	4.26163	8.25279		12.2294	15.4312	13.6991	15.4908	14.1208	14.37	17.5173		-5.46142	0.00812215	0.00873475		6.8841	8.74603
ZBTB5	12.4212	14.7998	15.4788	12.7848		21.5124	23.0272	15.0765	24.4556	15.3227	20.5563	26.73		-3.9698	0.00330492	0.00489545		22.6967	21.6033
ZBTB6	13.0157	16.8034	11.6272	17.9469		25.8879	28.0461	25.7773	21.4757	25.6878	28.9843	32.1018		-5.30503	0.00492482	0.00636552		15.4029	24.2196
ZC3H13	13.5267	13.9947	9.7182	16.1135		21.5794	12.6326	24.2465	21.7688	24.1448	25.7017	26.0502		-3.54309	0.0087761	0.00933419		18.8559	18.3558
ZC3H3	10.0636	9.67721	10.8351	9.10419		12.9045	21.6547	10.9927	11.9214	18.6063	12.6957	18.6639		-3.79428	0.00607796	0.00733605		13.6021	10.2547
ZC3H7A	24.7903	26.8295	24.8993	26.0688		34.2116	33.3211	28.0374	39.8094	27.285	31.3744	28.162		-3.74435	0.00642572	0.00760722		36.8751	47.9307
ZDHHC9	47.0033	56.4032	41.6847	47.756		84.2471	107.612	64.9243	60.0816	72.0542	68.142	53.9088		-3.72156	0.00476059	0.0061657		53.0599	67.2386
ZFAT	12.3397	12.8859	11.4846	10.9007		19.2672	17.7352	9.22631	26.9401	26.9466	20.9838	23.956		-3.48765	0.0106257	0.0106615		21.2038	28.9413
ZFP28	4.37299	4.70398	3.226	4.93258		4.5087	7.66704	10.3543	6.21961	10.475	9.65348	5.72823		-3.59225	0.00588153	0.00713623		6.31713	8.63676
ZFP64	24.7534	22.9668	18.7863	27.2734		47.8507	34.7213	56.3342	36.5788	58.734	46.9477	45.2463		-6.25284	0.000288693	0.000784985		34.6869	30.3536
ZFR	38.1228	35.7157	32.7217	35.0777		54.5384	42.4928	38.7595	50.4226	55.993	54.4381	58.404		-5.29768	0.000587947	0.00131307		45.6111	65.0246
ZFYVE20	37.5534	35.1845	28.9719	44.2901		48.1114	61.4278	61.668	52.9566	67.6163	59.5355	40.1239		-3.83156	0.00743809	0.00830657		34.9236	51.3059
ZFYVE28	2.44854	2.54084	3.32524	3.69872		1.33647	1.00935	1.22512	2.52245	1.62847	2.50446	1.10463		3.82367	0.00406741	0.0055948		2.88731	2.95047
ZHX1	26.7501	25.8909	18.8752	17.2828		30.7523	43.5555	31.8004	64.957	66.8943	31.404	46.3754		-4.03656	0.00321297	0.00470991		33.4431	45.2641
ZMYM2	30.1312	28.3186	25.7439	33.738		32.4881	32.9502	45.06	51.1244	41.585	33.7889	40.2675		-3.30517	0.00964679	0.0100478		39.5084	51.8584
ZNF131	16.1804	13.0163	11.932	13.0617		23.7765	26.4292	36.6484	20.1769	29.3311	24.3009	30.8094		-7.03872	7.57252e-05	0.000271177		19.1727	19.7063
ZNF140	2.00291	3.23402	2.33509	4.36343		9.04001	8.33946	6.90372	3.28877	8.03554	9.18832	4.2498		-3.61961	0.00797094	0.00863484		6.02279	4.33171
ZNF16	6.03595	5.26586	5.79828	5.50621		13.9212	16.2565	16.2419	10.9917	30.0954	17.2515	15.4175		-8.94544	5.45291e-05	0.000214087		9.10365	6.95654
ZNF192	7.20846	6.83874	7.42462	8.47753		9.27266	11.1698	23.4299	15.9652	15.7753	9.22837	11.2442		-4.05686	0.00434005	0.0057518		11.1545	14.0339
ZNF202	6.4057	7.18846	5.95476	6.01727		8.14798	8.23966	9.06346	9.5382	8.85045	8.7059	9.9266		-6.54095	0.000904645	0.00168415		11.3557	10.3279
ZNF236	5.09688	4.58626	3.18053	4.98549		6.70919	8.51629	8.81037	10.9646	7.67607	7.78222	6.3754		-4.64701	0.00461946	0.00600871		6.0252	10.0423
ZNF259	26.9496	26.0637	23.1243	23.4819		13.5194	16.3462	20.0093	28.2994	17.2372	13.7205	16.631		3.44589	0.00934589	0.00971955		28.8534	30.7403
ZNF300	6.10988	3.59407	4.01276	7.53656		11.1165	11.0136	25.6703	12.6443	12.6233	11.7057	9.07086		-4.27655	0.0051081	0.00652252		13.7563	6.96428
ZNF304	2.54481	2.0608	2.22415	2.19594		6.28468	4.00446	6.67366	4.22274	6.59929	4.22875	4.65647		-8.40097	2.31591e-05	0.00011418		4.64104	3.72042
ZNF326	78.6737	68.4923	66.2171	71.0596		81.9206	73.6127	105.124	90.5893	103.805	88.2074	89.0581		-3.89262	0.00373742	0.00532363		109.706	107.584
ZNF341	4.43961	3.46712	4.30383	4.54837		5.67746	6.22193	4.46377	6.00094	7.52842	6.39303	5.93019		-4.1842	0.00331093	0.004924		6.42636	9.33731
ZNF35	4.7747	4.84891	4.8653	4.52847		8.70237	9.73304	7.57926	10.6995	8.44167	10.4489	4.71358		-5.25695	0.00164807	0.00291158		4.3458	11.862
ZNF407	9.75476	8.47804	9.04244	8.33708		11.7927	11.2623	12.4281	12.1608	12.0901	12.7894	10.0113		-5.94373	0.000530716	0.00121316		10.1277	14.1548
ZNF470	2.71091	2.23893	2.90131	3.82072		7.06792	4.96849	7.58449	7.25791	8.34103	8.41501	7.904		-7.16963	0.000630132	0.00137016		5.52536	13.7824
ZNF496	24.2311	19.0379	19.841	21.8988		36.1401	24.7339	39.9716	28.9023	36.9242	37.5797	30.3897		-5.26071	0.000556614	0.00125598		42.9066	37.0115
ZNF518A	6.95249	6.88702	5.31124	8.25202		9.4946	12.5618	25.1164	14.1919	16.6015	11.6391	12.5266		-4.87015	0.00090269	0.00166988		12.282	17.2577
ZNF606	8.36591	5.76183	5.02086	5.82474		14.3494	9.87111	27.4767	17.3872	13.0634	14.0139	9.01545		-4.70241	0.00114422	0.00224078		8.53579	13.8289
ZNF614	4.27431	2.28171	4.58501	2.53008		1e-06	1e-06	4.7284	0.690802	1e-06	1e-06	1e-06		4.07333	0.0064295	0.00763577		2.38083	1.69489
ZNF638	29.0021	17.084	18.3052	22.1674		40.9329	39.1942	46.7899	26.2031	38.4664	36.6639	31.7831		-3.96534	0.00985587	0.0101477		27.5095	33.6081
ZNF646	11.6082	10.0552	8.29435	10.9659		15.7015	23.9476	21.0829	14.4621	16.4226	16.7752	13.2066		-4.80443	0.00119518	0.00235496		14.7441	14.5761
ZNF687	28.4483	25.0715	27.3071	23.2149		40.3079	51.9274	38.9197	40.6085	43.6876	34.1922	36.2969		-6.53381	0.000134174	0.000428174		36.4404	41.4456
ZNF773	1.17199	1.83742	2.71452	2.92318		4.42653	6.73725	7.78303	2.68439	9.53848	6.60602	6.69656		-4.0786	0.00575087	0.00696496		8.7607	10.587
ZNF793	0.960621	1.35229	1.50133	1.96314		2.29085	5.06739	5.7776	2.58202	3.3217	4.51117	2.82902		-4.66861	0.00190368	0.00323985		4.21133	5.12769
ZNF828	35.3924	33.4235	30.7127	25.0569		48.2653	35.0552	49.1038	52.8372	58.6565	46.9939	51.3937		-4.64006	0.0026644	0.00395347		41.5254	46.9254
ZSWIM3	9.48415	6.28958	12.7701	8.69839		17.618	20.2109	41.9024	12.7891	20.5761	14.7763	14.762		-3.55201	0.00734366	0.00822094		13.1734	9.8661
ZYX	260.295	214.776	385.171	275.515		121.965	132.989	178.878	116.661	111.179	149.419	266.4		3.76844	0.00579178	0.00703632		246.502	126.959
* We also tried Limma and CyberT, and obtained similar results.

## Sheet: Table S4B-CC+SC-Heatmap_genes
Table S4B (related to Figure 3): Enriched functions of differentially expressed genes between complex and simple carcinomas at FDR ≤ 0.2 (Table S4A & Figure 3D)
CC vs. SC FDR0.2-heatmap
Cluster	Gene
Chromatin organization	ARID1B
	ASF1A
	ATXN7L3
	BCORL1
	CBX1
	CHD6
	CREBBP
	CSRP2BP
	EHMT1
	EHMT2
	HUWE1
	ING3
	JMJD1C
	KAT2A
	MLL2
	MLL4
	MPHOSPH8
	MSL1
	MSL3
	SETD1A
	SETDB1
	SIRT1
	SRCAP
	SUPT6
	SUZ12
	UIMC1
	USP16
	USP21
Histone modification	ATXN7L3
	CREBBP
	CSRP2BP
	EHMT1
	HUWE1
	ING3
	KAT2A
	SIRT1
	SUZ12
	UIMC1
	USP16
	USP21
Chromatin modification	ARID1B
	ASF1A
	ATXN7L3
	BCORL1
	CHD6
	CREBBP
	CSRP2BP
	EHMT1
	EHMT2
	HUWE1
	ING3
	JMJD1C
	KAT2A
	MLL2
	MLL4
	MSL1
	MSL3
	SETD1A
	SETDB1
	SIRT1
	SRCAP
	SUPT6H
	SUZ12
	UIMC1
	USP16
	USP21
Regulation of transcription	ACTR5
	ADNP2
	ARID1B
	ASF1A
	ASXL1
	ATAD2
	ATF5
	ATXN7L3
	BCL11A
	BCL7A
	BCORL1
	C10ORF137
	CBFA2T2
	CCAR1
	CCNK
	CCNT2
	CD3EAP
	CEBPZ
	CHD6
	CIC
	CNOT8
	CREBBP
	DVL3
	ECD
	EHMT1
	EIF2C2
	ELF2
	ERCC2
	ESF1
	FRYL
	GZF1
	HSF1
	HSF2
	ILF3
	ING3
	JMJD1C
	KAT2A
	KHSRP
	MAPK14
	MBTD1
	MCM8
	MDM4
	MED1
	MED12
	MED22
	MED24
	MED7
	MLL2
	MLL4
	MLLT1
	MLLT6
	MLXIP
	MSL3
	MTERF
	MTERFD3
	MYCBP2
	NAA16
	NCOA3
	NCOA6
	NFXL1
	PHF6
	PIAS4
	PNN
	POGZ
	POLR3A
	POLR3F
	POLRMT
	PSMC3IP
	SETD1A
	SETDB1
	SIRT1
	SRCAP
	SUPT6H
	SUZ12
	TAF11
	TAF2
	TFAM
	UIMC1
	USP16
	USP21
	VEZF1
	XRN2
	YY1
	ZBTB10
	ZBTB12
	ZBTB26
	ZBTB43
	ZBTB5
	ZBTB6
	ZFAT
	ZFP28
	ZFP64
	ZHX1
	ZMYM2
	ZNF131
	ZNF16
	ZNF192
	ZNF202
	ZNF236
	ZNF300
	ZNF304
	ZNF326
	ZNF341
	ZNF35
	ZNF407
	ZNF470
	ZNF496
	ZNF518A
	ZNF606
	ZNF646
	ZNF687
DNA repair	ANKRD17
	ASF1A
	C1ORF124
	CHD6
	CPSF3
	DCLRE1B
	DDX27
	DDX42
	DDX49
	DHX30
	DHX35
	DHX57
	EIF2C2
	ELAC1
	EME1
	ERCC1
	ERCC2
	EXD2
	FANCB
	HELZ
	LIG1
	LIG3
	LOC81691
	MCM3AP
	MCM8
	MED1
	NCOA6
	NOL8
	NSMCE2
	PAN2
	PMS2
	POT1
	PSMC3IP
	REXO1
	RFC4
	RPA1
	SETX
	SIRT1
	SMC6
	SMG1
	SNRNP200
	SRCAP
	SUPV3L1
	TFAM
	TSN
	UIMC1
	UPF1
	XRN2
RNA processing	CCAR1
	CD3EAP
	CHERP
	CPSF1
	CPSF3
	CRNKL1
	CSTF1
	CTDP1
	DHX35
	EIF2C2
	ELAC1
	FIP1L1
	FTSJ2
	GAR1
	GEMIN5
	HEATR1
	HNRPLL
	KHSRP
	NSUN2
	NUP133
	NUP188
	NUP214
	NUP43
	NUP85
	PNN
	POLR1A
	POLR3A
	POLR3F
	POLRMT
	PPIL1
	PPP4R2
	RAE1
	RANBP17
	RBM6
	SETX
	SMG1
	SNRNP200
	SPOP
	THG1L
	TRA2B
	TRMT12
	TRNT1
	TSC1
	TSEN54
	UPF1
	USP39
	UTP23
	WDR3
	WDR4
	XRN2
	ZC3H3
	ZNF638
Cell cycle	ANAPC7
	CABLES2
	CCAR1
	CCNK
	CCNT2
	CDC23
	CDK6
	CEP135
	CSRP2BP
	DSN1
	HAUS5
	ILF3
	LIG1
	LIG3
	MCM8
	MDM4
	MPHOSPH8
	MPHOSPH9
	MTBP
	NEK1
	NEK4
	NIPBL
	NUP43
	PPM1D
	PSMC3IP
	PSMD12
	RABGAP1
	RIF1
	RPA1
	TAF2
	UPF1
	USP16
Endoplasmic reticulum	AGPAT9
	AGTRAP
	ALDH3A2
	CIB1
	CREB3L1
	ELOVL1
	FKBP2
	HSD11B1
	LEPREL2
	MAMDC2
	PGAP2
	SEC61B
	SELS
	SPCS3
	STIM1
	STX18
	TRAPPC1
	TUSC3
Extracellular matrix organization	B4GALT7
	BCL3
	CCDC80
	COL8A2
	IBSP
	ILK
	VWA1
Growth factor binding	A2M
	FLT1
	IGFBP3
	IGFBP6
	IL1RL1
	SEC61B
	WISP1
Polysaccharide metabolic process	B4GALT7
	CHST1
	GBE1
	MAMDC2
	NANS
	PPP1R2
Cell adhesion	CIB1
	COL8A2
	HSPB11
	IBSP
	ILK
	MAEA
	MUC16
	NPNT
	NRP2
	TNC
	WISP1
	ZYX

## Sheet: Tabel S4C-CC+SC-FDR0.2-1st
Table S4C (related to Figure 3): Functional annotation of the 1st group of genes of the heatmap of Figure 3D by DAVID*
Annotation Cluster 1	Enrichment Score&: 13.9150861725306
Category	Term	Count	%	PValue	Genes	List Total	Pop Hits	Pop Total	Fold Enrichment	Bonferroni	Benjamini	FDR
GOTERM_CC_FAT	GO:0070013~intracellular organelle lumen	99	21.3362	3.14665e-22	GRPEL2, SURF6, MED24, NAA16, CBX1, MED22, ZNF638, LOC81691, PNN, SETX, ESF1, CSNK2A1, DHX30, MLL4, MLL2, LIG1, YY1, MED12, LIG3, ARID1B, EARS2, SUZ12, RFC4, PIAS4, HUWE1, ANAPC7, NEK4, XRN2, SETD1A, COIL, VRK1, ZNF326, SUPV3L1, DDX42, UTP23, SETDB1, TAF2, ZMYM2, TSEN54, EME1, CREBBP, CDC23, HEATR1, C1ORF124, ZBTB43, PPIF, ATF5, POLRMT, PHF2, WDR4, WDR3, PHF6, CCNT2, CRNKL1, GAR1, CAD, MCM8, HSF1,…	261	1779	12782	2.72532	8.87357e-20	8.87357e-20	4.16519e-19
GOTERM_CC_FAT	GO:0043233~organelle lumen	99	21.3362	1.69875e-21	GRPEL2, SURF6, MED24, NAA16, CBX1, MED22, ZNF638, LOC81691, PNN, SETX, ESF1, CSNK2A1, DHX30, MLL4, MLL2, LIG1, YY1, MED12, LIG3, ARID1B, EARS2, SUZ12, RFC4, PIAS4, HUWE1, ANAPC7, NEK4, XRN2, SETD1A, COIL, VRK1, ZNF326, SUPV3L1, DDX42, UTP23, SETDB1, TAF2, ZMYM2, TSEN54, EME1, CREBBP, CDC23, HEATR1, C1ORF124, ZBTB43, PPIF, ATF5, POLRMT, PHF2, WDR4, WDR3, PHF6, CCNT2, CRNKL1, GAR1, CAD, MCM8, HSF1,…	261	1820	12782	2.66393	4.79046e-19	2.39523e-19	2.24861e-18
GOTERM_CC_FAT	GO:0031981~nuclear lumen	87	18.75	2.8672e-21	CCNT2, CRNKL1, SURF6, GAR1, MED24, NAA16, CAD, CBX1, MED22, ZNF638, LOC81691, SETX, PNN, ESF1, MCM8, CSNK2A1, HSF1, URB2, URB1, BRD4, FTSJ2, MLL4, MLL2, GPR19, LIG1, YY1, NOL8, LIG3, MED12, POLR1A, ZNF687, ARID1B, ZFR, CD3EAP, SUZ12, TAF11, MED7, RFC4, PIAS4, HUWE1, NCOA6, NOL11, ANAPC7, NEK4, CPSF3, CTDP1, CPSF1, XRN2, MED1, ING3, ZBTB10, SETD1A, COIL, POT1, RPA1, VRK1, ZNF326, USP36, NSUN2, ERC…	261	1450	12782	2.93839	8.08552e-19	2.69517e-19	3.79528e-18
GOTERM_CC_FAT	GO:0031974~membrane-enclosed lumen	99	21.3362	7.1356e-21	GRPEL2, SURF6, MED24, NAA16, CBX1, MED22, ZNF638, LOC81691, PNN, SETX, ESF1, CSNK2A1, DHX30, MLL4, MLL2, LIG1, YY1, MED12, LIG3, ARID1B, EARS2, SUZ12, RFC4, PIAS4, HUWE1, ANAPC7, NEK4, XRN2, SETD1A, COIL, VRK1, ZNF326, SUPV3L1, DDX42, UTP23, SETDB1, TAF2, ZMYM2, TSEN54, EME1, CREBBP, CDC23, HEATR1, C1ORF124, ZBTB43, PPIF, ATF5, POLRMT, PHF2, WDR4, WDR3, PHF6, CCNT2, CRNKL1, GAR1, CAD, MCM8, HSF1,…	261	1856	12782	2.61225	2.01224e-18	5.03059e-19	9.4453e-18
GOTERM_CC_FAT	GO:0005654~nucleoplasm	54	11.6379	5.41502e-13	CCNT2, CRNKL1, GAR1, SURF6, NAA16, MED24, CBX1, ZNF638, MED22, PNN, SETX, ESF1, MCM8, CSNK2A1, MLL4, MLL2, YY1, LIG1, LIG3, POLR1A, MED12, TAF11, SUZ12, CD3EAP, MED7, RFC4, NCOA6, ANAPC7, CPSF3, CTDP1, CPSF1, MED1, ING3, SETD1A, COIL, POT1, RPA1, ERCC1, DDX42, GEMIN5, ERCC2, KAT2A, TAF2, POLR3F, ZMYM2, CREBBP, CDC23, POLR3A, SIRT1, C1ORF124, ATXN7L3, ATF5, MAPK14, WDR4	261	882	12782	2.99836	1.52691e-10	3.05381e-11	7.16716e-10
GOTERM_CC_FAT	GO:0044451~nucleoplasm part	37	7.97414	6.14544e-10	ING3, CRNKL1, GAR1, SURF6, SETD1A, NAA16, MED24, MED22, ZNF638, COIL, PNN, RPA1, CSNK2A1, MLL4, MLL2, DDX42, GEMIN5, ERCC2, KAT2A, TAF2, POLR3F, ZMYM2, YY1, CREBBP, MED12, POLR3A, SIRT1, C1ORF124, ATXN7L3, CD3EAP, TAF11, SUZ12, ATF5, MED7, NCOA6, CPSF1, MED1	261	555	12782	3.26488	1.73301e-07	2.88836e-08	8.13464e-07
GOTERM_CC_FAT	GO:0005730~nucleolus	42	9.05172	6.93744e-10	CCNT2, GAR1, SURF6, ZBTB10, COIL, LOC81691, SETX, PNN, ESF1, VRK1, HSF1, URB2, URB1, USP36, BRD4, NSUN2, FTSJ2, SETDB1, UTP23, TSEN54, GPR19, NOL8, EME1, MED12, POLR1A, ILF3, ZNF687, HEATR1, ARID1B, SIRT1, ZFR, ZBTB43, PWP2, CD3EAP, PHF2, HUWE1, NCOA6, NOL11, WDR3, NEK4, XRN2, PHF6	261	698	12782	2.94681	1.95636e-07	2.7948e-08	9.183e-07
GOTERM_CC_FAT	GO:0043232~intracellular non-membrane-bounded organelle	86	18.5345	1.51706e-06	CCNT2, SURF6, GAR1, CEP78, CBX1, LOC81691, SETX, PNN, ESF1, CSNK2A1, HSF1, IFT20, RAE1, URB2, URB1, GOPC, BRD4, DHX30, FTSJ2, NUP133, MRPL4, MTERF, GPR19, DSN1, NOL8, MED12, POLR1A, NUP85, ZNF687, ARID1B, ZFR, DAPK1, CD3EAP, SUZ12, CCDC6, RFC4, HUWE1, RIF1, KRIT1, NCOA6, NOL11, WDR44, NEK4, NUP43, XRN2, PPP4R2, HAUS5, RABGAP1, ZBTB10, COIL, POT1, MYCBP2, RPA1, TFAM, MRPL13, VRK1, USP36, SUPV3L1, …	261	2596	12782	1.62238	0.00042772	5.3475e-05	0.0020081
GOTERM_CC_FAT	GO:0043228~non-membrane-bounded organelle	86	18.5345	1.51706e-06	CCNT2, SURF6, GAR1, CEP78, CBX1, LOC81691, SETX, PNN, ESF1, CSNK2A1, HSF1, IFT20, RAE1, URB2, URB1, GOPC, BRD4, DHX30, FTSJ2, NUP133, MRPL4, MTERF, GPR19, DSN1, NOL8, MED12, POLR1A, NUP85, ZNF687, ARID1B, ZFR, DAPK1, CD3EAP, SUZ12, CCDC6, RFC4, HUWE1, RIF1, KRIT1, NCOA6, NOL11, WDR44, NEK4, NUP43, XRN2, PPP4R2, HAUS5, RABGAP1, ZBTB10, COIL, POT1, MYCBP2, RPA1, TFAM, MRPL13, VRK1, USP36, SUPV3L1, …	261	2596	12782	1.62238	0.00042772	5.3475e-05	0.0020081
Annotation Cluster 2	Enrichment Score: 7.738572770145462
Category	Term	Count	%	PValue	Genes	List Total	Pop Hits	Pop Total	Fold Enrichment	Bonferroni	Benjamini	FDR
SP_PIR_KEYWORDS	zinc-finger	91	19.6121	7.06463e-13	ZNF202, HELZ, ZNF638, ZNF518A, NFXL1, ZFYVE20, RNF213, ZNF16, CBFA2T2, ZNF828, PHC3, ZNF304, MBTD1, ZNF300, RNF219, TRIM45, ZNF407, NSMCE2, RC3H2, ZFAT, USP16, ZNF496, MLL4, MLL2, POGZ, ZC3H7A, YY1, ZHX1, LIG3, ZNF687, ARHGAP29, ZFP28, ZBTB26, ZSWIM3, GZF1, SUZ12, ZNF192, TRIM37, ZNF236, ZNF341, PIAS4, TAF15, UBR5, RNF24, JMJD1C, MDM4, XRN2, ZC3H3, ING3, ZFP64, ZBTB10, ZBTB6, ZBTB12, ZNF131, ZNF3…	461	1718	19235	2.21009	2.0204e-10	6.73468e-11	9.37128e-10
SP_PIR_KEYWORDS	zinc	103	22.1983	1.84258e-11	ZNF638, NFXL1, RNF213, ZNF828, ZNF304, ZNF300, RNF219, TRIM45, RC3H2, MLL4, MLL2, YY1, ZHX1, LIG3, SUZ12, ZNF192, TRIM37, ZNF236, PIAS4, UBR5, RNF24, XRN2, ZC3H3, ELAC1, ZNF131, TTC3, ZNF326, RNFT2, ZDHHC9, VEZF1, TEC, DHX57, GIT1, ZC3H13, ZMYM2, EHMT1, CREBBP, ASXL1, MOBKL1A, EHMT2, C1ORF124, ZBTB43, MSL2, PHF2, SMYD5, PHF6, CAD, ZNF202, HELZ, ZFYVE20, ZNF518A, ZNF16, CBFA2T2, PHC3, MBTD1, ZNF40…	461	2189	19235	1.96328	5.26978e-09	1.05396e-09	2.44429e-08
GOTERM_MF_FAT	GO:0008270~zinc ion binding	107	23.0603	7.13297e-11	RBM6, ZNF638, NFXL1, RNF213, ZNF828, ZNF304, ZNF300, RNF219, TRIM45, RC3H2, MLL4, MLL2, YY1, ZNF646, ZHX1, LIG3, SUZ12, ZNF192, TRIM37, ZNF236, PIAS4, UBR5, RNF24, XRN2, ZC3H3, ELAC1, ZNF131, TTC3, ZNF326, ZDHHC9, RNFT2, VEZF1, TEC, DHX57, SETDB1, GIT1, TAF2, ZC3H13, ZMYM2, EHMT1, CREBBP, ASXL1, MOBKL1A, EHMT2, C1ORF124, ZBTB43, MSL2, PHF2, SMYD5, PHF6, CAD, ZNF202, HELZ, ZFYVE20, ZNF518A, ZNF16,…	328	2311	12983	1.83267	3.33823e-08	3.33823e-08	1.01762e-07
SP_PIR_KEYWORDS	metal-binding	122	26.2931	9.3594e-10	HCCS, EIF2C2, ZNF638, NFXL1, RNF213, ZNF828, ZNF304, MAP3K4, ZNF300, RNF219, TRIM45, RC3H2, MAP2K7, MLL4, MLL2, LIG1, YY1, ZHX1, LIG3, SUZ12, TRIM37, ZNF192, ZNF236, PIAS4, ATP9B, UBR5, NEK8, RNF24, NEK4, XRN2, ZC3H3, ELAC1, NEK1, ZNF131, PPAT, TTC3, ZNF326, ZDHHC9, RNFT2, VEZF1, TEC, DHX57, GIT1, ZC3H13, ZMYM2, EHMT1, ASXL1, EME1, CREBBP, IREB2, MOBKL1A, SMG1, EHMT2, C1ORF124, ZBTB43, DAGLB, MSL…	461	2972	19235	1.71278	2.67679e-07	3.34599e-08	1.24158e-06
GOTERM_MF_FAT	GO:0046914~transition metal ion binding	117	25.2155	2.60983e-09	HCCS, CDIPT, RBM6, ZNF638, NFXL1, RNF213, ZNF828, ZNF304, ZNF300, RNF219, TRIM45, RC3H2, MLL4, MLL2, YY1, ZNF646, ZHX1, LIG3, SUZ12, ZNF192, TRIM37, ZNF236, EIF2AK1, PIAS4, UBR5, RNF24, SLC25A37, XRN2, ZC3H3, ELAC1, ZNF131, TTC3, PPAT, ZNF326, ZDHHC9, RNFT2, VEZF1, TEC, DHX57, SETDB1, GIT1, TAF2, ZC3H13, ZMYM2, EHMT1, ASXL1, CREBBP, IREB2, MOBKL1A, SMG1, EHMT2, C1ORF124, ZBTB43, MSL2, PHF2, DCP2,…	328	2785	12983	1.66288	1.2214e-06	6.107e-07	3.7233e-06
GOTERM_MF_FAT	GO:0046872~metal ion binding	137	29.5259	0.000117173	HCCS, SLC9A8, CDIPT, EIF2C2, RBM6, ZNF638, NFXL1, RNF213, ZNF828, ZNF304, MAP3K4, ZNF300, RNF219, TRIM45, RC3H2, MAP2K7, MLL4, MLL2, ZNF646, LIG1, YY1, ZHX1, LIG3, SUZ12, TRIM37, ZNF192, ZNF236, EIF2AK1, PIAS4, ATP9B, UBR5, NEK8, SLC25A37, RNF24, NEK4, XRN2, TBC1D8B, ZC3H3, ELAC1, NEK1, ZNF131, PPAT, TTC3, ZNF326, ZDHHC9, RNFT2, VEZF1, TEC, DHX57, TAF2, SETDB1, GIT1, ZC3H13, ZMYM2, EHMT1, ASXL1, …	328	4140	12983	1.30985	0.0533633	0.00683155	0.167034
GOTERM_MF_FAT	GO:0043169~cation binding	137	29.5259	0.000186816	HCCS, SLC9A8, CDIPT, EIF2C2, RBM6, ZNF638, NFXL1, RNF213, ZNF828, ZNF304, MAP3K4, ZNF300, RNF219, TRIM45, RC3H2, MAP2K7, MLL4, MLL2, ZNF646, LIG1, YY1, ZHX1, LIG3, SUZ12, TRIM37, ZNF192, ZNF236, EIF2AK1, PIAS4, ATP9B, UBR5, NEK8, SLC25A37, RNF24, NEK4, XRN2, TBC1D8B, ZC3H3, ELAC1, NEK1, ZNF131, PPAT, TTC3, ZNF326, ZDHHC9, RNFT2, VEZF1, TEC, DHX57, TAF2, SETDB1, GIT1, ZC3H13, ZMYM2, EHMT1, ASXL1, …	328	4179	12983	1.29763	0.0837243	0.00966829	0.26619
GOTERM_MF_FAT	GO:0043167~ion binding	138	29.7414	0.000248618	HCCS, SLC9A8, CDIPT, EIF2C2, RBM6, ZNF638, NFXL1, RNF213, ZNF828, ZNF304, MAP3K4, ZNF300, RNF219, TRIM45, RC3H2, MLL4, MAP2K7, MLL2, ZNF646, LIG1, YY1, ZHX1, LIG3, SUZ12, TRIM37, ZNF192, ZNF236, EIF2AK1, PIAS4, ATP9B, UBR5, NEK8, SLC25A37, RNF24, NEK4, XRN2, TBC1D8B, ZC3H3, ELAC1, NEK1, ZNF131, PPAT, TTC3, ZNF326, ZDHHC9, RNFT2, VEZF1, TEC, DHX57, TAF2, SETDB1, GIT1, ZC3H13, ZMYM2, EHMT1, ASXL1, …	328	4241	12983	1.28799	0.109852	0.0115693	0.354106
Annotation Cluster 3	Enrichment Score: 5.685157906357479
Category	Term	Count	%	PValue	Genes	List Total	Pop Hits	Pop Total	Fold Enrichment	Bonferroni	Benjamini	FDR
GOTERM_BP_FAT	GO:0016568~chromatin modification	26	5.60345	1.86282e-08	ING3, SETD1A, CHD6, USP16, ASF1A, MLL4, MLL2, SETDB1, KAT2A, CSRP2BP, EHMT1, CREBBP, ARID1B, EHMT2, SIRT1, UIMC1, ATXN7L3, SUZ12, MSL3, HUWE1, BCORL1, MSL1, USP21, JMJD1C, SRCAP, SUPT6H	335	274	13528	3.83188	2.61909e-05	8.73037e-06	3.07091e-05
SP_PIR_KEYWORDS	chromatin regulator	21	4.52586	2.14925e-07	SETDB1, ING3, EHMT1, SETD1A, ARID1B, EHMT2, UIMC1, ATXN7L3, SUZ12, MSL3, DPY30, BCORL1, MSL1, USP21, JMJD1C, CHD6, USP16, ASF1A, MLL4, SRCAP, MLL2	461	213	19235	4.11368	6.14667e-05	6.14684e-06	0.000285111
GOTERM_BP_FAT	GO:0051276~chromosome organization	33	7.11207	4.1334e-07	ING3, SETD1A, CBX1, POT1, RPA1, NIPBL, CHD6, USP16, MLL4, ASF1A, ERCC1, MLL2, KAT2A, SETDB1, CSRP2BP, EHMT1, CREBBP, CDC23, ARID1B, EHMT2, SIRT1, UIMC1, ATXN7L3, MSL3, SUZ12, HUWE1, BCORL1, MSL1, USP21, JMJD1C, SRCAP, MPHOSPH8, SUPT6H	335	485	13528	2.74765	0.000580988	0.000116225	0.000681401
GOTERM_BP_FAT	GO:0006325~chromatin organization	28	6.03448	7.61035e-07	ING3, SETD1A, CBX1, CHD6, USP16, ASF1A, MLL4, MLL2, KAT2A, SETDB1, CSRP2BP, EHMT1, CREBBP, ARID1B, EHMT2, SIRT1, UIMC1, ATXN7L3, SUZ12, MSL3, HUWE1, BCORL1, MSL1, USP21, JMJD1C, SRCAP, MPHOSPH8, SUPT6H	335	378	13528	2.99127	0.00106944	0.00017832	0.00125458
GOTERM_BP_FAT	GO:0016570~histone modification	12	2.58621	0.000215308	KAT2A, SUZ12, CSRP2BP, ING3, EHMT1, HUWE1, CREBBP, USP21, USP16, SIRT1, ATXN7L3, UIMC1	335	122	13528	3.97201	0.26122	0.0158082	0.35435
GOTERM_BP_FAT	GO:0016569~covalent chromatin modification	12	2.58621	0.000285642	KAT2A, SUZ12, CSRP2BP, ING3, EHMT1, HUWE1, CREBBP, USP21, USP16, SIRT1, ATXN7L3, UIMC1	335	126	13528	3.84591	0.330799	0.0180921	0.46985
Annotation Cluster 4	Enrichment Score: 5.2353647565063754
Category	Term	Count	%	PValue	Genes	List Total	Pop Hits	Pop Total	Fold Enrichment	Bonferroni	Benjamini	FDR
SP_PIR_KEYWORDS	Transcription	100	21.5517	9.13198e-12	EIF2C2, CNOT8, MED24, MED22, PNN, ESF1, DPY30, ZNF304, ZNF300, MLL4, MTERFD3, MLL2, CCAR1, YY1, ZHX1, MED12, ARID1B, ZNF192, SUZ12, ZNF236, PIAS4, XRN2, SUPT6H, SETD1A, ZNF131, ZNF326, VEZF1, ASF1A, SETDB1, TAF2, ZMYM2, CREBBP, ASXL1, ATAD2, UIMC1, ZBTB43, MSL3, ATF5, POLRMT, PHF6, CCNT2, ELF2, ZNF202, ZNF518A, ZNF16, C10ORF137, MCM8, HSF1, HSF2, ACTR5, ZNF407, ZFAT, USP16, ZNF496, CCNK, MTERF, P…	461	2071	19235	2.0147	2.61176e-09	6.5294e-10	1.21142e-08
GOTERM_BP_FAT	GO:0006350~transcription	99	21.3362	7.60419e-11	EIF2C2, CNOT8, MED24, MED22, PNN, ESF1, ZNF304, ZNF300, MLL4, MTERFD3, MLL2, CCAR1, YY1, ZHX1, MED12, ARID1B, ZNF192, SUZ12, ZNF236, PIAS4, XRN2, SUPT6H, SETD1A, ZNF131, ZNF326, VEZF1, ASF1A, SETDB1, TAF2, ZMYM2, CREBBP, ASXL1, ATAD2, UIMC1, ZBTB43, MSL3, ATF5, POLRMT, PHF6, CCNT2, ELF2, ZNF202, ZNF518A, ZNF16, C10ORF137, MCM8, HSF1, HSF2, ACTR5, ZNF407, ZFAT, USP16, ZNF496, CCNK, MTERF, POLR1A, …	335	2101	13528	1.90282	1.06915e-07	1.06915e-07	1.25357e-07
SP_PIR_KEYWORDS	transcription regulation	95	20.4741	1.77836e-10	CCNT2, EIF2C2, CNOT8, ELF2, MED24, ZNF202, MED22, ZNF518A, ZNF16, C10ORF137, PNN, ESF1, ZNF304, DPY30, MCM8, HSF1, ZNF300, HSF2, ACTR5, ZNF407, ZFAT, USP16, MTERFD3, ZNF496, MLL4, CCAR1, MLL2, CCNK, MTERF, YY1, ZHX1, MED12, ZNF687, ARID1B, ZFP28, ZBTB26, GZF1, SUZ12, ZNF192, TAF11, MED7, ZNF236, ZNF341, PIAS4, NCOA3, NCOA6, KHSRP, USP21, JMJD1C, SRCAP, XRN2, MED1, SUPT6H, ING3, ZFP64, ZBTB10, ZBT…	461	2026	19235	1.95648	5.08611e-08	8.47685e-09	2.3591e-07
GOTERM_BP_FAT	GO:0045449~regulation of transcription	108	23.2759	1.16763e-08	EIF2C2, CNOT8, MED24, NAA16, MED22, NFXL1, PNN, ESF1, ZNF304, ZNF300, BCL7A, MTERFD3, MLL4, MLL2, CCAR1, YY1, ZNF646, ZHX1, MED12, ARID1B, SUZ12, ZNF192, ZNF236, PIAS4, XRN2, SUPT6H, SETD1A, ZNF131, ZNF326, VEZF1, ASF1A, SETDB1, TAF2, DVL3, ZMYM2, EHMT1, CREBBP, ASXL1, ATAD2, UIMC1, ZBTB43, MSL3, ATF5, PHF6, CCNT2, ELF2, ZNF202, ZNF518A, ZNF16, CBFA2T2, C10ORF137, MCM8, MBTD1, HSF1, HSF2, ACTR5, …	335	2601	13528	1.67676	1.64167e-05	8.20839e-06	1.92487e-05
GOTERM_MF_FAT	GO:0003677~DNA binding	94	20.2586	1.59302e-06	ELF2, CNOT8, SURF6, RBM6, ZNF202, ZNF638, ZNF518A, NFXL1, ZNF16, CBFA2T2, SETX, PNN, PHC3, ZNF304, ANKRD17, MCM8, HSF1, ZNF300, HSF2, PSMC3IP, ZNF407, RC3H2, PMS2, BRD4, ZFAT, ZNF496, MLL4, MLL2, MCM3AP, MTERF, POGZ, LIG1, YY1, ZNF646, ZHX1, LIG3, POLR1A, ZNF687, ARID1B, ZFP28, ZBTB26, ZFR, GZF1, ZNF192, TAF11, ZNF236, ZNF341, RFC4, PIAS4, TAF15, HUWE1, KHSRP, SRCAP, MED1, SUPT6H, ZFP64, ZBTB10, …	328	2331	12983	1.5962	0.000745257	0.000248481	0.00227265
SP_PIR_KEYWORDS	dna-binding	62	13.3621	0.00753485	ELF2, SURF6, ZNF202, ZNF638, ZNF518A, ZNF16, PNN, PHC3, ZNF304, MCM8, HSF1, HSF2, ZNF300, PSMC3IP, ZNF407, RC3H2, ZFAT, ZNF496, MLL4, MTERF, YY1, ZHX1, ZNF687, ARID1B, ZBTB26, ZFP28, ZFR, GZF1, ZNF192, ZNF236, ZNF341, TAF15, PIAS4, HUWE1, KHSRP, SRCAP, MED1, ZFP64, ZBTB6, ZBTB10, ZBTB12, ZNF131, ZNF35, CIC, POT1, RPA1, TFAM, ZNF326, MLXIP, STRBP, CHD6, VEZF1, ZNF606, ZNF470, ERCC1, ERCC2, ILF3, T…	461	1868	19235	1.38486	0.885035	0.0718766	9.54636
GOTERM_BP_FAT	GO:0006355~regulation of transcription, DNA-dependent	59	12.7155	0.0144233	CNOT8, ELF2, NAA16, MED24, ZNF202, MED22, NFXL1, CBFA2T2, ZNF304, HSF1, HSF2, ZNF300, PSMC3IP, USP16, ZNF496, MLL4, MLL2, YY1, ZHX1, MED12, ARID1B, ZFP28, GZF1, SUZ12, ZNF192, MED7, ZNF236, PIAS4, NCOA3, NCOA6, USP21, MDM4, JMJD1C, SRCAP, MED1, SUPT6H, ZNF131, ZNF35, TFAM, MLLT1, MLLT6, CHD6, VEZF1, ZNF606, ZNF470, ASF1A, ERCC2, KAT2A, TAF2, POLR3F, DVL3, EHMT1, CREBBP, ILF3, SIRT1, ATXN7L3, ATF5…	335	1773	13528	1.34379	1	0.296851	21.2981
GOTERM_BP_FAT	GO:0051252~regulation of RNA metabolic process	60	12.931	0.0150473	CNOT8, ELF2, NAA16, MED24, ZNF202, MED22, NFXL1, CBFA2T2, HNRPLL, ZNF304, HSF1, HSF2, ZNF300, PSMC3IP, USP16, ZNF496, MLL4, MLL2, YY1, ZHX1, MED12, ARID1B, ZFP28, GZF1, SUZ12, ZNF192, MED7, ZNF236, PIAS4, NCOA3, NCOA6, USP21, MDM4, JMJD1C, SRCAP, MED1, SUPT6H, ZNF131, ZNF35, TFAM, MLLT1, MLLT6, CHD6, VEZF1, ZNF606, ZNF470, ASF1A, ERCC2, KAT2A, TAF2, POLR3F, DVL3, EHMT1, CREBBP, ILF3, SIRT1, ATXN7…	335	1813	13528	1.33642	1	0.290949	22.1156
GOTERM_BP_FAT	GO:0006357~regulation of transcription from RNA polymerase II promoter	25	5.38793	0.0892286	ELF2, ZNF202, MED22, PSMC3IP, VEZF1, ZNF496, ERCC2, TAF2, KAT2A, EHMT1, YY1, CREBBP, MED12, SIRT1, GZF1, SUZ12, ATF5, MED7, PIAS4, MAPK14, NCOA6, MDM4, SRCAP, SUPT6H, MED1	335	727	13528	1.38866	1	0.731282	78.5784
GOTERM_MF_FAT	GO:0030528~transcription regulator activity	46	9.91379	0.132156	CNOT8, ELF2, ZNF131, MED24, ZNF35, ZNF202, MED22, NFXL1, CBFA2T2, TFAM, HSF1, HSF2, BCL11A, ECD, MLLT1, MLXIP, USP16, VEZF1, ZNF496, MLL4, ERCC2, KAT2A, MTERF, YY1, ZHX1, CREBBP, MED12, ATAD2, ILF3, ARID1B, SIRT1, ATXN7L3, ZNF192, TAF11, MSL3, MED7, ATF5, ZNF236, ADNP2, NCOA3, PIAS4, NCOA6, USP21, SRCAP, MED1, SUPT6H	328	1512	12983	1.20422	1	0.681369	86.7633
Annotation Cluster 5	Enrichment Score: 3.6973909919699666
Category	Term	Count	%	PValue	Genes	List Total	Pop Hits	Pop Total	Fold Enrichment	Bonferroni	Benjamini	FDR
GOTERM_BP_FAT	GO:0006974~response to DNA damage stimulus	25	5.38793	1.85556e-05	NEK1, SETX, RPA1, ANKRD17, NSMCE2, PMS2, ASF1A, ERCC1, FANCB, ERCC2, UPF1, LIG1, EME1, LIG3, SMG1, SMC6, C1ORF124, SIRT1, UIMC1, RFC4, DCLRE1B, RIF1, UBR5, MAPK14, NCOA6	335	373	13528	2.70657	0.025752	0.00260554	0.0305851
GOTERM_BP_FAT	GO:0006259~DNA metabolic process	30	6.46552	2.26277e-05	POT1, SETX, RPA1, TFAM, ANKRD17, MCM8, PSMC3IP, PMS2, NSMCE2, ASF1A, ERCC1, FANCB, ERCC2, MCM3AP, UPF1, LIG1, NOL8, EME1, LIG3, SMG1, SMC6, TSN, SIRT1, C1ORF124, UIMC1, DCLRE1B, RFC4, NCOA6, XRN2, MED1	335	506	13528	2.3942	0.0313141	0.00288808	0.0372959
GOTERM_BP_FAT	GO:0006281~DNA repair	21	4.52586	2.61733e-05	UPF1, LIG1, EME1, LIG3, SMC6, SMG1, SIRT1, C1ORF124, UIMC1, SETX, RPA1, ANKRD17, DCLRE1B, RFC4, NCOA6, NSMCE2, PMS2, ASF1A, FANCB, ERCC1, ERCC2	335	284	13528	2.986	0.0361312	0.00306198	0.0431387
GOTERM_BP_FAT	GO:0033554~cellular response to stress	30	6.46552	0.000165105	NEK1, SETX, RPA1, ANKRD17, MAP3K4, PMS2, NSMCE2, MAP2K7, ASF1A, ERCC1, FANCB, ERCC2, UPF1, BECN1, KIAA1804, LIG1, EME1, LIG3, SMG1, SMC6, C1ORF124, SIRT1, UIMC1, MAP4K3, DCLRE1B, RFC4, RIF1, MAPK14, UBR5, NCOA6	335	566	13528	2.14039	0.207178	0.0128147	0.271832
GOTERM_BP_FAT	GO:0006310~DNA recombination	11	2.37069	0.000265908	RPA1, LIG1, PSMC3IP, EME1, NCOA6, LIG3, PMS2, SMC6, NSMCE2, TSN, ERCC1	335	105	13528	4.2305	0.311966	0.017648	0.437456
SP_PIR_KEYWORDS	DNA damage	14	3.01724	0.00137239	LIG1, EME1, LIG3, SMG1, SMC6, UIMC1, SETX, DCLRE1B, RIF1, PMS2, NSMCE2, FANCB, ERCC1, ERCC2	461	205	19235	2.84948	0.324818	0.0194471	1.80532
SP_PIR_KEYWORDS	dna recombination	6	1.2931	0.00177465	LIG1, PSMC3IP, EME1, LIG3, SMC6, NSMCE2	461	37	19235	6.76614	0.398302	0.0228263	2.32872
SP_PIR_KEYWORDS	dna repair	13	2.80172	0.00224294	LIG1, EME1, LIG3, SMG1, SMC6, UIMC1, SETX, DCLRE1B, PMS2, NSMCE2, FANCB, ERCC1, ERCC2	461	191	19235	2.83989	0.473867	0.0275356	2.93481
Annotation Cluster 6	Enrichment Score: 3.52288044127516
Category	Term	Count	%	PValue	Genes	List Total	Pop Hits	Pop Total	Fold Enrichment	Bonferroni	Benjamini	FDR
GOTERM_BP_FAT	GO:0006351~transcription, DNA-dependent	23	4.9569	3.50101e-06	CCNT2, KAT2A, TAF2, CCNK, MTERF, MED12, MED24, POLR3A, CD3EAP, TAF11, MSL3, MED7, POLRMT, TFAM, HSF2, NCOA6, ECD, CEBPZ, MLLT1, MTERFD3, XRN2, ERCC2, MED1	335	292	13528	3.18078	0.00491034	0.000702958	0.00577136
GOTERM_BP_FAT	GO:0032774~RNA biosynthetic process	23	4.9569	4.36485e-06	CCNT2, KAT2A, TAF2, CCNK, MTERF, MED12, MED24, POLR3A, CD3EAP, TAF11, MSL3, MED7, POLRMT, TFAM, HSF2, NCOA6, ECD, CEBPZ, MLLT1, MTERFD3, XRN2, ERCC2, MED1	335	296	13528	3.1378	0.0061182	0.00076683	0.00719533
GOTERM_BP_FAT	GO:0006366~transcription from RNA polymerase II promoter	16	3.44828	0.000717584	CCNT2, KAT2A, TAF2, CCNK, MED12, MED24, TAF11, MSL3, MED7, HSF2, ECD, NCOA6, CEBPZ, MLLT1, MED1, ERCC2	335	234	13528	2.76117	0.635521	0.035404	1.17641
GOTERM_BP_FAT	GO:0006367~transcription initiation from RNA polymerase II promoter	8	1.72414	0.0013994	TAF11, TAF2, MED7, NCOA6, MED12, MED24, MED1, ERCC2	335	68	13528	4.75083	0.860394	0.0656406	2.28212
GOTERM_BP_FAT	GO:0006352~transcription initiation	8	1.72414	0.00438004	TAF11, TAF2, MED7, NCOA6, MED12, MED24, MED1, ERCC2	335	83	13528	3.89225	0.997913	0.139751	6.98085
GOTERM_CC_FAT	GO:0005667~transcription factor complex	11	2.37069	0.0108458	TAF11, KAT2A, CD3EAP, TAF2, MED7, ATF5, YY1, NCOA6, CREBBP, NAA16, ERCC2	261	210	12782	2.56526	0.953821	0.157049	13.4414
Annotation Cluster 7	Enrichment Score: 3.204118735270542
Category	Term	Count	%	PValue	Genes	List Total	Pop Hits	Pop Total	Fold Enrichment	Bonferroni	Benjamini	FDR
GOTERM_BP_FAT	GO:0016570~histone modification	12	2.58621	0.000215308	KAT2A, SUZ12, CSRP2BP, ING3, EHMT1, HUWE1, CREBBP, USP21, USP16, SIRT1, ATXN7L3, UIMC1	335	122	13528	3.97201	0.26122	0.0158082	0.35435
GOTERM_BP_FAT	GO:0016578~histone deubiquitination	5	1.07759	0.00021873	KAT2A, USP21, USP16, ATXN7L3, UIMC1	335	13	13528	15.5316	0.264767	0.0152608	0.359972
GOTERM_BP_FAT	GO:0016569~covalent chromatin modification	12	2.58621	0.000285642	KAT2A, SUZ12, CSRP2BP, ING3, EHMT1, HUWE1, CREBBP, USP21, USP16, SIRT1, ATXN7L3, UIMC1	335	126	13528	3.84591	0.330799	0.0180921	0.46985
GOTERM_BP_FAT	GO:0016579~protein deubiquitination	6	1.2931	0.00038207	KAT2A, USP21, USP46, USP16, ATXN7L3, UIMC1	335	26	13528	9.31894	0.415672	0.0230898	0.627993
GOTERM_BP_FAT	GO:0070646~protein modification by small protein removal	6	1.2931	0.000649149	KAT2A, USP21, USP46, USP16, ATXN7L3, UIMC1	335	29	13528	8.35492	0.598681	0.034506	1.06478
GOTERM_BP_FAT	GO:0070647~protein modification by small protein conjugation or removal	10	2.15517	0.0178653	KAT2A, SUZ12, HUWE1, PIAS4, USP21, SOCS7, USP46, USP16, ATXN7L3, UIMC1	335	160	13528	2.52388	1	0.331228	25.7088
Annotation Cluster 8	Enrichment Score: 2.794073367423241
Category	Term	Count	%	PValue	Genes	List Total	Pop Hits	Pop Total	Fold Enrichment	Bonferroni	Benjamini	FDR
UP_SEQ_FEATURE	domain:SET	8	1.72414	0.000160176	SETDB1, EHMT1, SETD1A, SMYD5, EHMT2, MLL4, SETD4, MLL2	461	49	19113	6.76896	0.18238	0.0283556	0.260129
INTERPRO	IPR001214:SET	8	1.72414	0.000180178	SETDB1, EHMT1, SETD1A, SMYD5, EHMT2, MLL4, SETD4, MLL2	410	49	16659	6.63375	0.116279	0.0403672	0.270643
SMART	SM00317:SET	8	1.72414	0.000312154	SETDB1, EHMT1, SETD1A, SMYD5, EHMT2, MLL4, SETD4, MLL2	246	49	9079	6.02555	0.0496159	0.0251236	0.377463
GOTERM_MF_FAT	GO:0042054~histone methyltransferase activity	7	1.50862	0.00039441	SETDB1, SUZ12, EHMT1, SETD1A, EHMT2, MLL4, MLL2	328	39	12983	7.10452	0.16858	0.0152673	0.561214
UP_SEQ_FEATURE	domain:Post-SET	5	1.07759	0.00047888	SETDB1, SETD1A, EHMT2, MLL4, MLL2	461	16	19113	12.9562	0.452338	0.0584329	0.775822
INTERPRO	IPR003616:Post-SET zinc-binding region	5	1.07759	0.000661087	SETDB1, SETD1A, EHMT2, MLL4, MLL2	410	17	16659	11.9505	0.364699	0.0867368	0.989663
GOTERM_CC_FAT	GO:0034708~methyltransferase complex	5	1.07759	0.000762099	SUZ12, SETD1A, NCOA6, MLL4, MLL2	261	21	12782	11.6603	0.193454	0.0212699	1.00409
GOTERM_CC_FAT	GO:0035097~histone methyltransferase complex	5	1.07759	0.000762099	SUZ12, SETD1A, NCOA6, MLL4, MLL2	261	21	12782	11.6603	0.193454	0.0212699	1.00409
SMART	SM00508:PostSET	5	1.07759	0.000933385	SETDB1, SETD1A, EHMT2, MLL4, MLL2	246	17	9079	10.8549	0.141194	0.0373383	1.12478
GOTERM_MF_FAT	GO:0016278~lysine N-methyltransferase activity	6	1.2931	0.00113157	SETDB1, EHMT1, SETD1A, EHMT2, MLL4, MLL2	328	32	12983	7.42168	0.41132	0.0325747	1.60228
GOTERM_MF_FAT	GO:0016279~protein-lysine N-methyltransferase activity	6	1.2931	0.00113157	SETDB1, EHMT1, SETD1A, EHMT2, MLL4, MLL2	328	32	12983	7.42168	0.41132	0.0325747	1.60228
GOTERM_MF_FAT	GO:0018024~histone-lysine N-methyltransferase activity	6	1.2931	0.00113157	SETDB1, EHMT1, SETD1A, EHMT2, MLL4, MLL2	328	32	12983	7.42168	0.41132	0.0325747	1.60228
UP_SEQ_FEATURE	binding site:S-adenosyl-L-methionine	7	1.50862	0.00135444	EHMT1, GNMT, EHMT2, MLL4, FTSJ2, NSUN2, MLL2	461	51	19113	5.69057	0.817987	0.143482	2.1797
UP_SEQ_FEATURE	region of interest:S-adenosyl-L-methionine binding	6	1.2931	0.00141347	EHMT1, GNMT, EHMT2, MLL4, NSUN2, MLL2	461	35	19113	7.10741	0.831023	0.127828	2.27369
GOTERM_MF_FAT	GO:0008276~protein methyltransferase activity	7	1.50862	0.00152338	SETDB1, SUZ12, EHMT1, SETD1A, EHMT2, MLL4, MLL2	328	50	12983	5.54152	0.510066	0.0368555	2.15149
GOTERM_MF_FAT	GO:0008170~N-methyltransferase activity	7	1.50862	0.00206639	SETDB1, EHMT1, SETD1A, GNMT, EHMT2, MLL4, MLL2	328	53	12983	5.22785	0.620186	0.0450523	2.90794
SP_PIR_KEYWORDS	methyltransferase	11	2.37069	0.00272631	SETDB1, EHMT1, SETD1A, TRMT12, METTL2A, GNMT, EHMT2, MLL4, FTSJ2, NSUN2, MLL2	461	146	19235	3.14363	0.541955	0.0307489	3.55676
SP_PIR_KEYWORDS	s-adenosyl-l-methionine	9	1.93966	0.00330144	SETDB1, EHMT1, SETD1A, TRMT12, GNMT, EHMT2, MLL4, NSUN2, MLL2	461	103	19235	3.64583	0.611621	0.0357223	4.29198
INTERPRO	IPR003606:Pre-SET zinc-binding sub-group	3	0.646552	0.00572476	SETDB1, EHMT1, EHMT2	410	5	16659	24.379	0.980522	0.279785	8.2724
SMART	SM00468:PreSET	3	0.646552	0.00687253	SETDB1, EHMT1, EHMT2	246	5	9079	22.1439	0.675052	0.170845	8.01417
INTERPRO	IPR015722:MLL Transcription Factor	3	0.646552	0.00844812	SETD1A, MLL4, MLL2	410	6	16659	20.3159	0.997032	0.304936	11.9793
UP_SEQ_FEATURE	domain:Pre-SET	3	0.646552	0.0112027	SETDB1, EHMT1, EHMT2	461	7	19113	17.7685	0.999999	0.366702	16.7385
INTERPRO	IPR007728:Pre-SET zinc-binding region	3	0.646552	0.0116363	SETDB1, EHMT1, EHMT2	410	7	16659	17.4136	0.999674	0.330661	16.141
KEGG_PATHWAY	hsa00310:Lysine degradation	4	0.862069	0.0421597	SETDB1, EHMT1, SETD1A, EHMT2	91	44	5085	5.07992	0.98532	0.505172	37.8908
Annotation Cluster 9	Enrichment Score: 2.64370488110362
Category	Term	Count	%	PValue	Genes	List Total	Pop Hits	Pop Total	Fold Enrichment	Bonferroni	Benjamini	FDR
GOTERM_BP_FAT	GO:0031123~RNA 3'-end processing	6	1.2931	0.000459508	TRNT1, ZC3H3, ELAC1, CPSF3, CSTF1, CPSF1	335	27	13528	8.9738	0.475975	0.0265664	0.754823
GOTERM_BP_FAT	GO:0006379~mRNA cleavage	4	0.862069	0.00212382	EIF2C2, CPSF3, CSTF1, CPSF1	335	11	13528	14.6844	0.949675	0.089184	3.44418
GOTERM_BP_FAT	GO:0006378~mRNA polyadenylation	4	0.862069	0.00212382	ZC3H3, CPSF3, CSTF1, CPSF1	335	11	13528	14.6844	0.949675	0.089184	3.44418
GOTERM_BP_FAT	GO:0043631~RNA polyadenylation	4	0.862069	0.00443469	ZC3H3, CPSF3, CSTF1, CPSF1	335	14	13528	11.5377	0.998068	0.138247	7.06498
GOTERM_BP_FAT	GO:0031124~mRNA 3'-end processing	4	0.862069	0.00657788	ZC3H3, CPSF3, CSTF1, CPSF1	335	16	13528	10.0955	0.999907	0.175776	10.3087
Annotation Cluster 10	Enrichment Score: 2.510802452362863
Category	Term	Count	%	PValue	Genes	List Total	Pop Hits	Pop Total	Fold Enrichment	Bonferroni	Benjamini	FDR
UP_SEQ_FEATURE	nucleotide phosphate-binding region:ATP	43	9.26724	0.000146531	NEK1, STK35, HELZ, EPHB4, CMPK2, SETX, DDX27, VRK1, MCM8, CSNK2A1, MAP3K4, PEX1, DDX49, TAP2, SUPV3L1, DHX35, CHD6, DHX30, MAP2K7, MDN1, DHX57, DDX42, ERCC2, DCAKD, TEC, UPF1, KIAA1804, SMC6, ATAD2, CDK6, EARS2, DAPK1, MAP4K3, TOR2A, EIF2AK1, RFC4, MAPK14, UBA2, ARAF, SNRNP200, NEK8, NEK4, SRCAP	461	962	19113	1.8532	0.168233	0.030234	0.237993
SP_PIR_KEYWORDS	atp-binding	52	11.2069	0.000534173	STK35, HELZ, CAD, SETX, DDX27, MCM8, CSNK2A1, MAP3K4, OPLAH, PEX1, DHX35, DHX30, MDN1, MAP2K7, TRPM4, KIAA1804, LIG1, LIG3, CDK6, EARS2, DAPK1, MAP4K3, TOR2A, RFC4, EIF2AK1, ATP9B, SNRNP200, NEK8, NEK4, SRCAP, NEK1, EPHB4, CMPK2, VRK1, DDX49, TAP2, SUPV3L1, CHD6, DHX57, DDX42, DCAKD, TEC, ERCC2, UPF1, ATAD2, SMG1, SMC6, TRNT1, ATP13A1, MAPK14, UBA2, ARAF	461	1326	19235	1.63626	0.141711	0.00894879	0.706296
GOTERM_MF_FAT	GO:0005524~ATP binding	57	12.2845	0.00111154	FASTKD3, STK35, HELZ, CAD, SETX, DDX27, ANKRD17, MCM8, CSNK2A1, MAP3K4, OPLAH, PEX1, ACTR5, PMS2, DHX35, DHX30, MDN1, MAP2K7, TRPM4, KIAA1804, LIG1, LIG3, CDK6, DAPK1, EARS2, MAP4K3, TOR2A, EIF2AK1, RFC4, ATP9B, SNRNP200, NEK8, NEK4, FASTKD5, SRCAP, NEK1, EPHB4, CMPK2, VRK1, DDX49, TAP2, SUPV3L1, CHD6, DHX57, DDX42, DCAKD, TEC, ERCC2, UPF1, ATAD2, SMG1, SMC6, TRNT1, ATP13A1, MAPK14, UBA2, ARAF	328	1477	12983	1.52755	0.40577	0.0341042	1.57413
GOTERM_MF_FAT	GO:0032559~adenyl ribonucleotide binding	57	12.2845	0.00151074	FASTKD3, STK35, HELZ, CAD, SETX, DDX27, ANKRD17, MCM8, CSNK2A1, MAP3K4, OPLAH, PEX1, ACTR5, PMS2, DHX35, DHX30, MDN1, MAP2K7, TRPM4, KIAA1804, LIG1, LIG3, CDK6, DAPK1, EARS2, MAP4K3, TOR2A, EIF2AK1, RFC4, ATP9B, SNRNP200, NEK8, NEK4, FASTKD5, SRCAP, NEK1, EPHB4, CMPK2, VRK1, DDX49, TAP2, SUPV3L1, CHD6, DHX57, DDX42, DCAKD, TEC, ERCC2, UPF1, ATAD2, SMG1, SMC6, TRNT1, ATP13A1, MAPK14, UBA2, ARAF	328	1497	12983	1.50714	0.507154	0.0385463	2.13382
GOTERM_MF_FAT	GO:0000166~nucleotide binding	78	16.8103	0.00215784	FASTKD3, GRPEL2, STK35, KIAA0430, RBM6, CAD, HELZ, RNF213, HNRPLL, LOC81691, SETX, DDX27, ANKRD17, MCM8, MAP3K4, CSNK2A1, PEX1, OPLAH, ARL15, RAVER1, ACTR5, PMS2, DHX35, DHX30, MDN1, MAP2K7, TRPM4, C9ORF86, NOL8, KIAA1804, LIG1, LIG3, SPAG1, CDK6, DAPK1, EARS2, TOR2A, MAP4K3, MFN1, EIF2AK1, RFC4, TAF15, ATP9B, SNRNP200, NEK8, NEK4, FASTKD5, SRCAP, NKIRAS2, TRA2B, NEK1, SETD1A, EPHB4, CMPK2, VRK1,…	328	2245	12983	1.37524	0.636131	0.044913	3.0348
GOTERM_MF_FAT	GO:0030554~adenyl nucleotide binding	58	12.5	0.00296348	FASTKD3, GRPEL2, STK35, HELZ, CAD, SETX, DDX27, ANKRD17, MCM8, MAP3K4, CSNK2A1, OPLAH, PEX1, ACTR5, PMS2, DHX35, DHX30, MDN1, MAP2K7, TRPM4, KIAA1804, LIG1, LIG3, CDK6, DAPK1, EARS2, MAP4K3, TOR2A, EIF2AK1, RFC4, ATP9B, SNRNP200, NEK8, NEK4, FASTKD5, SRCAP, NEK1, EPHB4, CMPK2, VRK1, DDX49, TAP2, SUPV3L1, CHD6, DHX57, DDX42, DCAKD, TEC, ERCC2, UPF1, ATAD2, SMG1, SMC6, TRNT1, ATP13A1, MAPK14, UBA2,…	328	1577	12983	1.45579	0.750667	0.0586025	4.14572
GOTERM_MF_FAT	GO:0001882~nucleoside binding	59	12.7155	0.00300366	FASTKD3, GRPEL2, STK35, HELZ, CAD, SETX, DDX27, ANKRD17, MCM8, MAP3K4, CSNK2A1, OPLAH, PEX1, ACTR5, PMS2, DHX35, DHX30, MDN1, MAP2K7, TRPM4, KIAA1804, LIG1, LIG3, CDK6, DAPK1, EARS2, MAP4K3, TOR2A, EIF2AK1, RFC4, ATP9B, SNRNP200, NEK8, NEK4, FASTKD5, SRCAP, NEK1, EPHB4, CMPK2, VRK1, DDX49, TAP2, SUPV3L1, CHD6, DHX57, DDX42, DCAKD, TEC, ERCC2, UPF1, ATAD2, SMG1, SMC6, POLR3A, TRNT1, ATP13A1, MAPK1…	328	1612	12983	1.44873	0.755326	0.0569722	4.20082
GOTERM_MF_FAT	GO:0001883~purine nucleoside binding	58	12.5	0.00411454	FASTKD3, GRPEL2, STK35, HELZ, CAD, SETX, DDX27, ANKRD17, MCM8, MAP3K4, CSNK2A1, OPLAH, PEX1, ACTR5, PMS2, DHX35, DHX30, MDN1, MAP2K7, TRPM4, KIAA1804, LIG1, LIG3, CDK6, DAPK1, EARS2, MAP4K3, TOR2A, EIF2AK1, RFC4, ATP9B, SNRNP200, NEK8, NEK4, FASTKD5, SRCAP, NEK1, EPHB4, CMPK2, VRK1, DDX49, TAP2, SUPV3L1, CHD6, DHX57, DDX42, DCAKD, TEC, ERCC2, UPF1, ATAD2, SMG1, SMC6, TRNT1, ATP13A1, MAPK14, UBA2,…	328	1601	12983	1.43396	0.854791	0.0715275	5.71245
GOTERM_MF_FAT	GO:0032555~purine ribonucleotide binding	64	13.7931	0.00583437	FASTKD3, STK35, CAD, HELZ, SETX, DDX27, ANKRD17, MCM8, MAP3K4, CSNK2A1, OPLAH, PEX1, ARL15, ACTR5, PMS2, DHX35, DHX30, MDN1, MAP2K7, TRPM4, C9ORF86, KIAA1804, LIG1, LIG3, SPAG1, CDK6, DAPK1, EARS2, TOR2A, MAP4K3, MFN1, EIF2AK1, RFC4, ATP9B, SNRNP200, NEK8, NEK4, FASTKD5, SRCAP, NKIRAS2, NEK1, EPHB4, CMPK2, VRK1, DDX49, TAP2, C4ORF14, SUPV3L1, CHD6, DHX57, DDX42, DCAKD, TEC, ERCC2, RANBP17, UPF1, …	328	1836	12983	1.37978	0.935332	0.0845487	8.00901
GOTERM_MF_FAT	GO:0032553~ribonucleotide binding	64	13.7931	0.00583437	FASTKD3, STK35, CAD, HELZ, SETX, DDX27, ANKRD17, MCM8, MAP3K4, CSNK2A1, OPLAH, PEX1, ARL15, ACTR5, PMS2, DHX35, DHX30, MDN1, MAP2K7, TRPM4, C9ORF86, KIAA1804, LIG1, LIG3, SPAG1, CDK6, DAPK1, EARS2, TOR2A, MAP4K3, MFN1, EIF2AK1, RFC4, ATP9B, SNRNP200, NEK8, NEK4, FASTKD5, SRCAP, NKIRAS2, NEK1, EPHB4, CMPK2, VRK1, DDX49, TAP2, C4ORF14, SUPV3L1, CHD6, DHX57, DDX42, DCAKD, TEC, ERCC2, RANBP17, UPF1, …	328	1836	12983	1.37978	0.935332	0.0845487	8.00901
SP_PIR_KEYWORDS	nucleotide-binding	57	12.2845	0.00746444	STK35, HELZ, CAD, SETX, DDX27, MCM8, CSNK2A1, MAP3K4, OPLAH, PEX1, ARL15, DHX35, DHX30, MDN1, MAP2K7, C9ORF86, TRPM4, KIAA1804, LIG1, LIG3, SPAG1, CDK6, EARS2, DAPK1, MAP4K3, TOR2A, MFN1, EIF2AK1, RFC4, ATP9B, SNRNP200, NEK8, NEK4, SRCAP, NKIRAS2, NEK1, EPHB4, CMPK2, VRK1, DDX49, TAP2, SUPV3L1, CHD6, DHX57, DDX42, DCAKD, TEC, ERCC2, UPF1, ATAD2, SMG1, SMC6, TRNT1, ATP13A1, MAPK14, UBA2, ARAF	461	1686	19235	1.41062	0.882679	0.0736748	9.4612
GOTERM_MF_FAT	GO:0017076~purine nucleotide binding	65	14.0086	0.0100234	FASTKD3, GRPEL2, STK35, CAD, HELZ, SETX, DDX27, ANKRD17, MCM8, MAP3K4, CSNK2A1, OPLAH, PEX1, ARL15, ACTR5, PMS2, DHX35, DHX30, MDN1, MAP2K7, TRPM4, C9ORF86, KIAA1804, LIG1, LIG3, SPAG1, CDK6, DAPK1, EARS2, TOR2A, MAP4K3, MFN1, EIF2AK1, RFC4, ATP9B, SNRNP200, NEK8, NEK4, FASTKD5, SRCAP, NKIRAS2, NEK1, EPHB4, CMPK2, VRK1, DDX49, TAP2, C4ORF14, SUPV3L1, CHD6, DHX57, DDX42, DCAKD, TEC, ERCC2, RANBP17…	328	1918	12983	1.34142	0.991037	0.116681	13.387
GOTERM_MF_FAT	GO:0004672~protein kinase activity	22	4.74138	0.0865067	FASTKD3, KIAA1804, NEK1, STK35, SMG1, CDK6, CAD, EPHB4, DAPK1, MAP4K3, VRK1, CSNK2A1, MAP3K4, EIF2AK1, MAPK14, ARAF, NEK8, NEK4, MAP2K7, FASTKD5, TEC, ERCC2	328	606	12983	1.43698	1	0.571252	72.4954
Annotation Cluster 11	Enrichment Score: 2.3927294681233904
Category	Term	Count	%	PValue	Genes	List Total	Pop Hits	Pop Total	Fold Enrichment	Bonferroni	Benjamini	FDR
GOTERM_BP_FAT	GO:0044265~cellular macromolecule catabolic process	34	7.32759	0.000525077	USPL1, BAP1, MYCBP2, RPA1, USP39, MTBP, NSMCE2, USP36, USP16, FBXO21, ERCC1, SPOP, ERCC2, FBXL18, PAN2, UPF1, FBXL20, RNF19A, BIRC6, SOCS7, SMG1, CDC23, PSMD12, PIAS4, HUWE1, DCP2, UBR5, UBA2, USP21, USP46, ANAPC7, FBXL6, USP42, XRN2	335	725	13528	1.89378	0.522147	0.0291061	0.862094
SP_PIR_KEYWORDS	ubl conjugation pathway	25	5.38793	0.0012916	BAP1, MYCBP2, MTBP, NSMCE2, USP36, USP16, FBXO21, FBXL18, SPOP, RNF19A, FBXL20, CDC23, SOCS7, BIRC6, TRIM37, DCAF7, PIAS4, HUWE1, UBR5, UBA2, USP21, USP46, ANAPC7, FBXL6, USP42	461	509	19235	2.04934	0.309014	0.0192665	1.69988
GOTERM_BP_FAT	GO:0009057~macromolecule catabolic process	34	7.32759	0.00179653	USPL1, BAP1, MYCBP2, RPA1, USP39, MTBP, NSMCE2, USP36, USP16, FBXO21, ERCC1, SPOP, ERCC2, FBXL18, PAN2, UPF1, FBXL20, RNF19A, BIRC6, SOCS7, SMG1, CDC23, PSMD12, PIAS4, HUWE1, DCP2, UBR5, UBA2, USP21, USP46, ANAPC7, FBXL6, USP42, XRN2	335	781	13528	1.75799	0.920197	0.0783176	2.92079
GOTERM_BP_FAT	GO:0043632~modification-dependent macromolecule catabolic process	27	5.81897	0.00215477	USPL1, BAP1, MYCBP2, USP39, MTBP, NSMCE2, USP36, USP16, FBXO21, FBXL18, SPOP, PAN2, RNF19A, FBXL20, BIRC6, SOCS7, CDC23, PSMD12, PIAS4, HUWE1, UBR5, UBA2, USP21, USP46, ANAPC7, FBXL6, USP42	335	574	13528	1.89951	0.951823	0.0878083	3.49354
GOTERM_BP_FAT	GO:0019941~modification-dependent protein catabolic process	27	5.81897	0.00215477	USPL1, BAP1, MYCBP2, USP39, MTBP, NSMCE2, USP36, USP16, FBXO21, FBXL18, SPOP, PAN2, RNF19A, FBXL20, BIRC6, SOCS7, CDC23, PSMD12, PIAS4, HUWE1, UBR5, UBA2, USP21, USP46, ANAPC7, FBXL6, USP42	335	574	13528	1.89951	0.951823	0.0878083	3.49354
GOTERM_BP_FAT	GO:0051603~proteolysis involved in cellular protein catabolic process	27	5.81897	0.00384246	USPL1, BAP1, MYCBP2, USP39, MTBP, NSMCE2, USP36, USP16, FBXO21, FBXL18, SPOP, PAN2, RNF19A, FBXL20, BIRC6, SOCS7, CDC23, PSMD12, PIAS4, HUWE1, UBR5, UBA2, USP21, USP46, ANAPC7, FBXL6, USP42	335	600	13528	1.81719	0.995541	0.129591	6.1494
GOTERM_BP_FAT	GO:0044257~cellular protein catabolic process	27	5.81897	0.00414837	USPL1, BAP1, MYCBP2, USP39, MTBP, NSMCE2, USP36, USP16, FBXO21, FBXL18, SPOP, PAN2, RNF19A, FBXL20, BIRC6, SOCS7, CDC23, PSMD12, PIAS4, HUWE1, UBR5, UBA2, USP21, USP46, ANAPC7, FBXL6, USP42	335	603	13528	1.80815	0.997105	0.135945	6.62339
GOTERM_BP_FAT	GO:0030163~protein catabolic process	27	5.81897	0.00617971	USPL1, BAP1, MYCBP2, USP39, MTBP, NSMCE2, USP36, USP16, FBXO21, FBXL18, SPOP, PAN2, RNF19A, FBXL20, BIRC6, SOCS7, CDC23, PSMD12, PIAS4, HUWE1, UBR5, UBA2, USP21, USP46, ANAPC7, FBXL6, USP42	335	622	13528	1.75292	0.999836	0.16926	9.71423
GOTERM_BP_FAT	GO:0006511~ubiquitin-dependent protein catabolic process	14	3.01724	0.00719971	PAN2, USPL1, BAP1, CDC23, PSMD12, UBR5, USP39, USP21, USP46, USP36, ANAPC7, USP16, FBXO21, USP42	335	242	13528	2.33615	0.999961	0.187252	11.2297
GOTERM_BP_FAT	GO:0006508~proteolysis	30	6.46552	0.29468	USPL1, BAP1, MYCBP2, USP39, MTBP, NSMCE2, USP36, USP16, FBXO21, FBXL18, SPOP, PAN2, FBXL20, RNF19A, BIRC6, SOCS7, CDC23, OSGEPL1, PWP2, CAPN10, PSMD12, PIAS4, HUWE1, UBR5, UBA2, USP21, USP46, ANAPC7, FBXL6, USP42	335	1054	13528	1.1494	1	0.957858	99.6833
Annotation Cluster 12	Enrichment Score: 2.2964103309579182
Category	Term	Count	%	PValue	Genes	List Total	Pop Hits	Pop Total	Fold Enrichment	Bonferroni	Benjamini	FDR
GOTERM_BP_FAT	GO:0051236~establishment of RNA localization	12	2.58621	2.63812e-05	ZC3H3, NUP133, RANBP17, NUP214, UPF1, TSC1, RAE1, KHSRP, SMG1, NUP188, NUP85, NUP43	335	97	13528	4.99572	0.036413	0.0028492	0.0434813
GOTERM_BP_FAT	GO:0050657~nucleic acid transport	12	2.58621	2.63812e-05	ZC3H3, NUP133, RANBP17, NUP214, UPF1, TSC1, RAE1, KHSRP, SMG1, NUP188, NUP85, NUP43	335	97	13528	4.99572	0.036413	0.0028492	0.0434813
GOTERM_BP_FAT	GO:0050658~RNA transport	12	2.58621	2.63812e-05	ZC3H3, NUP133, RANBP17, NUP214, UPF1, TSC1, RAE1, KHSRP, SMG1, NUP188, NUP85, NUP43	335	97	13528	4.99572	0.036413	0.0028492	0.0434813
GOTERM_BP_FAT	GO:0006403~RNA localization	12	2.58621	3.51717e-05	ZC3H3, NUP133, RANBP17, NUP214, UPF1, TSC1, RAE1, KHSRP, SMG1, NUP188, NUP85, NUP43	335	100	13528	4.84585	0.0482495	0.00352608	0.0579658
GOTERM_BP_FAT	GO:0051028~mRNA transport	11	2.37069	5.45459e-05	ZC3H3, NUP133, RANBP17, NUP214, UPF1, RAE1, KHSRP, SMG1, NUP188, NUP85, NUP43	335	87	13528	5.10578	0.0738264	0.00509986	0.0898825
GOTERM_BP_FAT	GO:0015931~nucleobase, nucleoside, nucleotide and nucleic acid transport	12	2.58621	0.000108602	ZC3H3, NUP133, RANBP17, NUP214, UPF1, TSC1, RAE1, KHSRP, SMG1, NUP188, NUP85, NUP43	335	113	13528	4.28836	0.141615	0.00949852	0.178883
GOTERM_CC_FAT	GO:0005643~nuclear pore	8	1.72414	0.00110699	NUP133, RANBP17, NUP214, CSE1L, RAE1, NUP188, NUP85, NUP43	261	79	12782	4.95931	0.26827	0.0279955	1.45542
SP_PIR_KEYWORDS	nuclear pore complex	6	1.2931	0.00252642	NUP133, RANBP17, NUP214, NUP188, NUP85, NUP43	461	40	19235	6.25868	0.514935	0.0296948	3.30001
GOTERM_CC_FAT	GO:0046930~pore complex	8	1.72414	0.00320829	NUP133, RANBP17, NUP214, CSE1L, RAE1, NUP188, NUP85, NUP43	261	95	12782	4.12406	0.595941	0.0673331	4.16441
GOTERM_BP_FAT	GO:0006405~RNA export from nucleus	6	1.2931	0.0032171	ZC3H3, NUP133, UPF1, TSC1, RAE1, SMG1	335	41	13528	5.90957	0.989225	0.118251	5.17341
GOTERM_BP_FAT	GO:0051168~nuclear export	7	1.50862	0.00353319	ZC3H3, NUP133, NUP214, UPF1, TSC1, RAE1, SMG1	335	60	13528	4.71124	0.993102	0.125846	5.66792
GOTERM_BP_FAT	GO:0006913~nucleocytoplasmic transport	11	2.37069	0.00536912	ZC3H3, NUP133, RANBP17, MCM3AP, NUP214, UPF1, CSE1L, TSC1, RAE1, SMG1, MLXIP	335	156	13528	2.84746	0.999484	0.158046	8.49257
GOTERM_BP_FAT	GO:0051169~nuclear transport	11	2.37069	0.00586461	ZC3H3, NUP133, RANBP17, MCM3AP, NUP214, UPF1, CSE1L, TSC1, RAE1, SMG1, MLXIP	335	158	13528	2.81141	0.999744	0.164547	9.24117
GOTERM_BP_FAT	GO:0006406~mRNA export from nucleus	5	1.07759	0.00848948	ZC3H3, NUP133, UPF1, RAE1, SMG1	335	33	13528	6.1185	0.999994	0.21317	13.1119
SP_PIR_KEYWORDS	mRNA transport	7	1.50862	0.00852694	NUP133, RANBP17, NUP214, KHSRP, NUP188, NUP85, NUP43	461	74	19235	3.94691	0.913634	0.0736807	10.7385
GOTERM_CC_FAT	GO:0031080~Nup107-160 complex	3	0.646552	0.016654	NUP133, NUP85, NUP43	261	10	12782	14.692	0.991226	0.201901	19.9328
GOTERM_CC_FAT	GO:0000777~condensed chromosome kinetochore	5	1.07759	0.0301323	NUP133, DSN1, CREBBP, NUP85, NUP43	261	58	12782	4.22183	0.999821	0.291863	33.3017
SP_PIR_KEYWORDS	translocation	6	1.2931	0.0320938	NUP133, RANBP17, NUP214, NUP188, NUP85, NUP43	461	74	19235	3.38307	0.999911	0.195039	35.1262
GOTERM_CC_FAT	GO:0000779~condensed chromosome, centromeric region	5	1.07759	0.045213	NUP133, DSN1, CREBBP, NUP85, NUP43	261	66	12782	3.71009	0.999998	0.383214	45.7968
GOTERM_CC_FAT	GO:0005635~nuclear envelope	9	1.93966	0.0584434	NUP133, RANBP17, NUP214, CSE1L, RAE1, NUP188, NUP85, SIRT1, NUP43	261	205	12782	2.15004	1	0.432251	54.9382
GOTERM_CC_FAT	GO:0000776~kinetochore	5	1.07759	0.0716734	NUP133, DSN1, CREBBP, NUP85, NUP43	261	77	12782	3.18008	1	0.480766	62.6355
GOTERM_CC_FAT	GO:0000775~chromosome, centromeric region	6	1.2931	0.108768	NUP133, DSN1, CREBBP, NUP85, CBX1, NUP43	261	124	12782	2.36967	1	0.565095	78.2213
GOTERM_CC_FAT	GO:0000793~condensed chromosome	6	1.2931	0.122941	RPA1, NUP133, DSN1, CREBBP, NUP85, NUP43	261	129	12782	2.27782	1	0.594351	82.3851
SP_PIR_KEYWORDS	kinetochore	4	0.862069	0.191077	NUP133, DSN1, NUP85, NUP43	461	63	19235	2.64918	1	0.612331	93.9974
GOTERM_CC_FAT	GO:0012505~endomembrane system	17	3.66379	0.520735	NUP133, RANBP17, LMAN2L, DENND1A, PIGU, NUP85, NUP188, NECAB3, SIRT1, NUP214, CSE1L, RAE1, POMT1, DPM1, RC3H2, GOSR1, NUP43	261	782	12782	1.06463	1	0.960867	99.9941
GOTERM_BP_FAT	GO:0055085~transmembrane transport	15	3.23276	0.544414	TRPM4, SLC5A3, NUP133, GRPEL2, RANBP17, SLC9A8, NUP188, NUP85, SLC26A2, NUP214, TAP2, SLC39A9, SLC25A37, NUP43, SLC25A41	335	569	13528	1.06455	1	0.994288	99.9998
Annotation Cluster 13	Enrichment Score: 2.2213774263228134
Category	Term	Count	%	PValue	Genes	List Total	Pop Hits	Pop Total	Fold Enrichment	Bonferroni	Benjamini	FDR
UP_SEQ_FEATURE	domain:DZF	3	0.646552	0.005508	ILF3, STRBP, ZFR	461	5	19113	24.8759	0.999034	0.270632	8.58931
INTERPRO	IPR006561:DZF	3	0.646552	0.00572476	ILF3, STRBP, ZFR	410	5	16659	24.379	0.980522	0.279785	8.2724
SMART	SM00572:DZF	3	0.646552	0.00687253	ILF3, STRBP, ZFR	246	5	9079	22.1439	0.675052	0.170845	8.01417
Annotation Cluster 14	Enrichment Score: 2.203237929535984
Category	Term	Count	%	PValue	Genes	List Total	Pop Hits	Pop Total	Fold Enrichment	Bonferroni	Benjamini	FDR
GOTERM_BP_FAT	GO:0043624~cellular protein complex disassembly	5	1.07759	0.000673315	MTERF, MTRF1, MTRF1L, MTERFD3, XRN2	335	17	13528	11.8771	0.612097	0.0344661	1.10421
GOTERM_BP_FAT	GO:0043241~protein complex disassembly	5	1.07759	0.000673315	MTERF, MTRF1, MTRF1L, MTERFD3, XRN2	335	17	13528	11.8771	0.612097	0.0344661	1.10421
GOTERM_BP_FAT	GO:0034623~cellular macromolecular complex disassembly	5	1.07759	0.00355047	MTERF, MTRF1, MTRF1L, MTERFD3, XRN2	335	26	13528	7.76579	0.993268	0.123309	5.69487
GOTERM_BP_FAT	GO:0032984~macromolecular complex disassembly	5	1.07759	0.00355047	MTERF, MTRF1, MTRF1L, MTERFD3, XRN2	335	26	13528	7.76579	0.993268	0.123309	5.69487
SP_PIR_KEYWORDS	transcription termination	3	0.646552	0.00803126	MTERF, MTERFD3, XRN2	461	6	19235	20.8623	0.900362	0.0716941	10.1447
GOTERM_BP_FAT	GO:0006353~transcription termination	3	0.646552	0.011757	MTERF, MTERFD3, XRN2	335	7	13528	17.3066	1	0.269291	17.7137
GOTERM_BP_FAT	GO:0022411~cellular component disassembly	5	1.07759	0.0414888	MTERF, MTRF1, MTRF1L, MTERFD3, XRN2	335	53	13528	3.80963	1	0.52959	50.2693
GOTERM_BP_FAT	GO:0034621~cellular macromolecular complex subunit organization	14	3.01724	0.105701	RANBP17, NUP133, MTERF, CRNKL1, MTRF1L, TFAM, CSE1L, MTRF1, SNRNP200, USP39, MTERFD3, ASF1A, XRN2, GEMIN5	335	357	13528	1.58361	1	0.763315	84.1446
Annotation Cluster 15	Enrichment Score: 2.1417080441831
Category	Term	Count	%	PValue	Genes	List Total	Pop Hits	Pop Total	Fold Enrichment	Bonferroni	Benjamini	FDR
GOTERM_BP_FAT	GO:0006367~transcription initiation from RNA polymerase II promoter	8	1.72414	0.0013994	TAF11, TAF2, MED7, NCOA6, MED12, MED24, MED1, ERCC2	335	68	13528	4.75083	0.860394	0.0656406	2.28212
GOTERM_BP_FAT	GO:0043933~macromolecular complex subunit organization	32	6.89655	0.00147725	CRNKL1, NFS1, MED24, TFAM, CSE1L, TAP2, GOPC, USP39, GNMT, USP16, ASF1A, MDN1, MTERFD3, ERCC2, GEMIN5, TAF2, NUP133, RANBP17, MTERF, CREBBP, MED12, MTRF1L, TAF11, MED7, DGAT1, TSC1, MTRF1, NCOA6, SNRNP200, MDM4, XRN2, MED1	335	710	13528	1.82004	0.874889	0.0669394	2.40764
GOTERM_BP_FAT	GO:0006352~transcription initiation	8	1.72414	0.00438004	TAF11, TAF2, MED7, NCOA6, MED12, MED24, MED1, ERCC2	335	83	13528	3.89225	0.997913	0.139751	6.98085
GOTERM_BP_FAT	GO:0065003~macromolecular complex assembly	26	5.60345	0.0239608	CRNKL1, NFS1, MED24, TFAM, CSE1L, TAP2, GOPC, USP39, GNMT, USP16, ASF1A, MDN1, ERCC2, GEMIN5, TAF2, RANBP17, CREBBP, MED12, TAF11, MED7, DGAT1, TSC1, NCOA6, SNRNP200, MDM4, MED1	335	665	13528	1.57885	1	0.398869	32.9553
GOTERM_BP_FAT	GO:0070271~protein complex biogenesis	21	4.52586	0.0255087	TAF2, RANBP17, CREBBP, NFS1, MED12, MED24, TAF11, MED7, TFAM, CSE1L, TSC1, TAP2, GOPC, NCOA6, GNMT, MDM4, USP16, MDN1, ERCC2, GEMIN5, MED1	335	505	13528	1.67926	1	0.413905	34.6867
GOTERM_BP_FAT	GO:0006461~protein complex assembly	21	4.52586	0.0255087	TAF2, RANBP17, CREBBP, NFS1, MED12, MED24, TAF11, MED7, TFAM, CSE1L, TSC1, TAP2, GOPC, NCOA6, GNMT, MDM4, USP16, MDN1, ERCC2, GEMIN5, MED1	335	505	13528	1.67926	1	0.413905	34.6867
Annotation Cluster 16	Enrichment Score: 2.1406395745549527
Category	Term	Count	%	PValue	Genes	List Total	Pop Hits	Pop Total	Fold Enrichment	Bonferroni	Benjamini	FDR
GOTERM_MF_FAT	GO:0046966~thyroid hormone receptor binding	8	1.72414	1.18011e-05	TAF11, NCOA3, PSMC3IP, NCOA6, MED12, MED24, JMJD1C, MED1	328	32	12983	9.89558	0.00550774	0.00110398	0.0168347
GOTERM_BP_FAT	GO:0006367~transcription initiation from RNA polymerase II promoter	8	1.72414	0.0013994	TAF11, TAF2, MED7, NCOA6, MED12, MED24, MED1, ERCC2	335	68	13528	4.75083	0.860394	0.0656406	2.28212
UP_SEQ_FEATURE	short sequence motif:LXXLL motif 2	5	1.07759	0.00143163	NCOA3, NCOA6, MED24, MED1, MLL2	461	21	19113	9.8714	0.834842	0.120703	2.30259
UP_SEQ_FEATURE	short sequence motif:LXXLL motif 1	5	1.07759	0.00143163	NCOA3, NCOA6, MED24, MED1, MLL2	461	21	19113	9.8714	0.834842	0.120703	2.30259
GOTERM_MF_FAT	GO:0030374~ligand-dependent nuclear receptor transcription coactivator activity	6	1.2931	0.00195125	NCOA3, NCOA6, MED12, MED24, ATXN7L3, MED1	328	36	12983	6.59705	0.599113	0.0446751	2.748
GOTERM_CC_FAT	GO:0016592~Srb-mediator complex	5	1.07759	0.00266216	MED7, MED12, MED24, MED22, MED1	261	29	12782	8.44365	0.528451	0.0607225	3.46704
GOTERM_MF_FAT	GO:0035257~nuclear hormone receptor binding	8	1.72414	0.00320677	TAF11, NCOA3, PSMC3IP, NCOA6, MED12, MED24, JMJD1C, MED1	328	77	12983	4.11245	0.777578	0.0583552	4.47887
GOTERM_BP_FAT	GO:0006352~transcription initiation	8	1.72414	0.00438004	TAF11, TAF2, MED7, NCOA6, MED12, MED24, MED1, ERCC2	335	83	13528	3.89225	0.997913	0.139751	6.98085
GOTERM_MF_FAT	GO:0016455~RNA polymerase II transcription mediator activity	5	1.07759	0.00570672	MED7, MED12, MED24, MED22, MED1	328	29	12983	6.82454	0.931327	0.0854104	7.84036
GOTERM_MF_FAT	GO:0051427~hormone receptor binding	8	1.72414	0.00670082	TAF11, NCOA3, PSMC3IP, NCOA6, MED12, MED24, JMJD1C, MED1	328	88	12983	3.59839	0.956999	0.0936496	9.14621
GOTERM_MF_FAT	GO:0016251~general RNA polymerase II transcription factor activity	6	1.2931	0.00823896	TAF11, MED7, MED12, MED24, MED22, MED1	328	50	12983	4.74988	0.979179	0.101969	11.1328
GOTERM_BP_FAT	GO:0030518~steroid hormone receptor signaling pathway	6	1.2931	0.0140136	NCOA3, UBR5, NCOA6, MED12, MED24, MED1	335	58	13528	4.17746	1	0.293981	20.7571
GOTERM_MF_FAT	GO:0042809~vitamin D receptor binding	4	0.862069	0.0193042	TAF11, MED12, MED24, MED1	328	23	12983	6.88388	0.999891	0.187252	24.2775
UP_SEQ_FEATURE	short sequence motif:LXXLL motif 3	3	0.646552	0.0275331	NCOA3, MED24, MLL2	461	11	19113	11.3072	1	0.566379	36.4897
GOTERM_BP_FAT	GO:0030522~intracellular receptor-mediated signaling pathway	6	1.2931	0.0377571	NCOA3, UBR5, NCOA6, MED12, MED24, MED1	335	75	13528	3.23057	1	0.509355	46.9795
GOTERM_MF_FAT	GO:0030331~estrogen receptor binding	3	0.646552	0.0410752	NCOA3, PSMC3IP, NCOA6	328	13	12983	9.13438	1	0.353513	45.0294
GOTERM_BP_FAT	GO:0030521~androgen receptor signaling pathway	4	0.862069	0.0585135	NCOA3, MED12, MED24, MED1	335	36	13528	4.4869	1	0.614236	62.9901
GOTERM_MF_FAT	GO:0003702~RNA polymerase II transcription factor activity	10	2.15517	0.162983	TAF11, MED7, ATF5, MED12, MLLT1, MED24, ZNF202, MED22, VEZF1, MED1	328	244	12983	1.62223	1	0.738923	92.0988
GOTERM_MF_FAT	GO:0035258~steroid hormone receptor binding	3	0.646552	0.248203	NCOA3, PSMC3IP, NCOA6	328	38	12983	3.12492	1	0.859627	98.2924
Annotation Cluster 17	Enrichment Score: 2.101900187316004
Category	Term	Count	%	PValue	Genes	List Total	Pop Hits	Pop Total	Fold Enrichment	Bonferroni	Benjamini	FDR
GOTERM_BP_FAT	GO:0006396~RNA processing	36	7.75862	2.39886e-07	ZC3H3, FIP1L1, PPP4R2, EIF2C2, ELAC1, CHERP, CRNKL1, GAR1, TRA2B, PPIL1, RBM6, ZNF638, HNRPLL, SETX, PNN, USP39, THG1L, DHX35, FTSJ2, NSUN2, SPOP, CCAR1, GEMIN5, UTP23, TSEN54, HEATR1, TRNT1, TRMT12, SNRNP200, WDR4, KHSRP, WDR3, CPSF3, CSTF1, CPSF1, XRN2	335	547	13528	2.65769	0.000337223	8.43164e-05	0.000395458
GOTERM_BP_FAT	GO:0016071~mRNA metabolic process	25	5.38793	1.62551e-05	ZC3H3, EIF2C2, PPP4R2, FIP1L1, CRNKL1, PPIL1, TRA2B, HNRPLL, PNN, USP39, DHX35, GEMIN5, CCAR1, SPOP, PAN2, TSEN54, UPF1, SMG1, DCP2, SNRNP200, KHSRP, CPSF3, CSTF1, CPSF1, XRN2	335	370	13528	2.72852	0.0225957	0.00253621	0.0267937
GOTERM_BP_FAT	GO:0006397~mRNA processing	21	4.52586	0.000143512	ZC3H3, FIP1L1, TSEN54, EIF2C2, PPP4R2, CRNKL1, PPIL1, TRA2B, HNRPLL, PNN, SNRNP200, USP39, KHSRP, DHX35, CPSF3, CSTF1, CPSF1, XRN2, GEMIN5, CCAR1, SPOP	335	321	13528	2.64182	0.182735	0.0118	0.236321
SP_PIR_KEYWORDS	mrna processing	16	3.44828	0.00157329	FIP1L1, TSEN54, PPP4R2, CRNKL1, PPIL1, TRA2B, PNN, SNRNP200, USP39, KHSRP, DHX35, CPSF3, CSTF1, XRN2, CPSF1, GEMIN5	461	260	19235	2.56766	0.362573	0.0212153	2.06704
GOTERM_BP_FAT	GO:0008380~RNA splicing	16	3.44828	0.00472281	TSEN54, PPP4R2, CRNKL1, PPIL1, TRA2B, ZNF638, PNN, SNRNP200, USP39, KHSRP, DHX35, CPSF3, CSTF1, CPSF1, GEMIN5, CCAR1	335	284	13528	2.27505	0.998714	0.143406	7.50737
KEGG_PATHWAY	hsa03040:Spliceosome	7	1.50862	0.0235014	CHERP, CRNKL1, PPIL1, TRA2B, USP39, SNRNP200, DDX42	91	126	5085	3.1044	0.902766	0.441588	23.1227
GOTERM_BP_FAT	GO:0000375~RNA splicing, via transesterification reactions	9	1.93966	0.0360957	CRNKL1, TRA2B, USP39, SNRNP200, CPSF3, CSTF1, CPSF1, GEMIN5, CCAR1	335	153	13528	2.37542	1	0.50267	45.45
GOTERM_BP_FAT	GO:0000398~nuclear mRNA splicing, via spliceosome	9	1.93966	0.0360957	CRNKL1, TRA2B, USP39, SNRNP200, CPSF3, CSTF1, CPSF1, GEMIN5, CCAR1	335	153	13528	2.37542	1	0.50267	45.45
GOTERM_BP_FAT	GO:0000377~RNA splicing, via transesterification reactions with bulged adenosine as nucleophile	9	1.93966	0.0360957	CRNKL1, TRA2B, USP39, SNRNP200, CPSF3, CSTF1, CPSF1, GEMIN5, CCAR1	335	153	13528	2.37542	1	0.50267	45.45
SP_PIR_KEYWORDS	mrna splicing	10	2.15517	0.0648106	PPP4R2, CRNKL1, PPIL1, TRA2B, USP39, SNRNP200, KHSRP, DHX35, GEMIN5, PNN	461	209	19235	1.99639	1	0.329174	58.8883
GOTERM_CC_FAT	GO:0030529~ribonucleoprotein complex	16	3.44828	0.10382	MRPL4, EIF2C2, UPF1, CRNKL1, GAR1, PPIL1, HEATR1, ILF3, HNRPLL, PNN, MRPL13, DCP2, SNRNP200, WDR3, DHX35, GEMIN5	261	515	12782	1.5215	1	0.576264	76.5652
GOTERM_CC_FAT	GO:0005681~spliceosome	6	1.2931	0.131837	CRNKL1, PPIL1, SNRNP200, DHX35, GEMIN5, PNN	261	132	12782	2.22605	1	0.604325	84.6088
SP_PIR_KEYWORDS	Spliceosome	6	1.2931	0.160556	CRNKL1, PPIL1, SNRNP200, DHX35, GEMIN5, PNN	461	120	19235	2.08623	1	0.571892	90.1892
GOTERM_BP_FAT	GO:0000245~spliceosome assembly	3	0.646552	0.18657	CRNKL1, USP39, SNRNP200	335	32	13528	3.78582	1	0.907428	96.6764
GOTERM_BP_FAT	GO:0022618~ribonucleoprotein complex assembly	4	0.862069	0.242501	CRNKL1, USP39, SNRNP200, GEMIN5	335	69	13528	2.34099	1	0.942173	98.973
Annotation Cluster 18	Enrichment Score: 2.083790482487488
Category	Term	Count	%	PValue	Genes	List Total	Pop Hits	Pop Total	Fold Enrichment	Bonferroni	Benjamini	FDR
SP_PIR_KEYWORDS	helicase	14	3.01724	2.02039e-05	UPF1, HELZ, SETX, DDX27, DDX49, SNRNP200, SUPV3L1, DHX35, CHD6, DHX30, SRCAP, DDX42, ERCC2, DHX57	461	134	19235	4.35928	0.0057617	0.000481415	0.0267983
GOTERM_MF_FAT	GO:0004386~helicase activity	14	3.01724	5.24478e-05	UPF1, HELZ, SETX, DDX27, DDX49, SNRNP200, SUPV3L1, DHX35, CHD6, DHX30, SRCAP, DDX42, ERCC2, DHX57	328	140	12983	3.95823	0.0242474	0.00408268	0.0747984
GOTERM_MF_FAT	GO:0070035~purine NTP-dependent helicase activity	10	2.15517	0.00080413	DDX27, UPF1, DDX49, SNRNP200, DHX35, DHX30, CHD6, DDX42, DHX57, ERCC2	328	98	12983	4.03901	0.31373	0.0265334	1.14111
GOTERM_MF_FAT	GO:0008026~ATP-dependent helicase activity	10	2.15517	0.00080413	DDX27, UPF1, DDX49, SNRNP200, DHX35, DHX30, CHD6, DDX42, DHX57, ERCC2	328	98	12983	4.03901	0.31373	0.0265334	1.14111
INTERPRO	IPR001650:DNA/RNA helicase, C-terminal	10	2.15517	0.00127731	DDX27, DDX49, SNRNP200, SUPV3L1, DHX35, DHX30, CHD6, SRCAP, DDX42, DHX57	410	107	16659	3.79736	0.583887	0.11773	1.90393
UP_SEQ_FEATURE	domain:Helicase ATP-binding	10	2.15517	0.00136078	DDX27, DDX49, SUPV3L1, DHX35, DHX30, CHD6, SRCAP, DDX42, DHX57, ERCC2	461	110	19113	3.76908	0.819436	0.132933	2.18981
SMART	SM00490:HELICc	10	2.15517	0.00220806	DDX27, DDX49, SNRNP200, SUPV3L1, DHX35, DHX30, CHD6, SRCAP, DDX42, DHX57	246	106	9079	3.48175	0.302541	0.0695271	2.64209
UP_SEQ_FEATURE	domain:Helicase C-terminal	9	1.93966	0.00385962	DDX27, DDX49, SUPV3L1, DHX35, DHX30, CHD6, SRCAP, DDX42, DHX57	461	105	19113	3.5537	0.992257	0.206636	6.09429
INTERPRO	IPR014021:Helicase, superfamily 1 and 2, ATP-binding	9	1.93966	0.00485265	DDX27, DDX49, SNRNP200, DHX35, DHX30, CHD6, SRCAP, DDX42, DHX57	410	107	16659	3.41762	0.964457	0.283733	7.05486
INTERPRO	IPR014001:DEAD-like helicase, N-terminal	9	1.93966	0.00542296	DDX27, DDX49, SNRNP200, DHX35, DHX30, CHD6, SRCAP, DDX42, DHX57	410	109	16659	3.35491	0.976014	0.2876	7.85275
GOTERM_MF_FAT	GO:0042623~ATPase activity, coupled	15	3.23276	0.00905675	UPF1, DDX27, RFC4, ATP13A1, DDX49, PEX1, ATP9B, TAP2, SNRNP200, DHX35, CHD6, DHX30, DDX42, ERCC2, DHX57	328	272	12983	2.18285	0.985848	0.108703	12.1726
SMART	SM00487:DEXDc	9	1.93966	0.00916132	DDX27, DDX49, SNRNP200, DHX35, DHX30, CHD6, SRCAP, DDX42, DHX57	246	109	9079	3.04733	0.776909	0.192903	10.5495
GOTERM_MF_FAT	GO:0016887~ATPase activity	17	3.66379	0.010608	UPF1, ATAD2, DDX27, RFC4, ATP13A1, DDX49, PEX1, ATP9B, TAP2, SNRNP200, DHX35, DHX30, CHD6, MDN1, DDX42, ERCC2, DHX57	328	334	12983	2.01467	0.993202	0.120126	14.1138
INTERPRO	IPR002464:DNA/RNA helicase, ATP-dependent, DEAH-box type, conserved site	5	1.07759	0.014955	DHX35, DHX30, CHD6, DHX57, ERCC2	410	39	16659	5.20919	0.999968	0.362	20.2776
INTERPRO	IPR011545:DNA/RNA helicase, DEAD/DEAH box type, N-terminal	5	1.07759	0.0626529	DDX27, DDX49, SNRNP200, DDX42, DHX57	410	61	16659	3.33047	1	0.635328	62.2091
INTERPRO	IPR011709:Region of unknown function DUF1605	3	0.646552	0.0641523	DHX35, DHX30, DHX57	410	17	16659	7.1703	1	0.636053	63.1082
INTERPRO	IPR007502:Helicase-associated region	3	0.646552	0.0710323	DHX35, DHX30, DHX57	410	18	16659	6.77195	1	0.666734	66.9832
UP_SEQ_FEATURE	short sequence motif:DEAH box	4	0.862069	0.0798362	DHX35, DHX30, CHD6, ERCC2	461	42	19113	3.94856	1	0.819953	74.1509
INTERPRO	IPR000629:RNA helicase, ATP-dependent, DEAD-box, conserved site	3	0.646552	0.184989	DDX27, DDX49, DDX42	410	32	16659	3.80922	1	0.929181	95.3878
UP_SEQ_FEATURE	short sequence motif:DEAD box	3	0.646552	0.188133	DDX27, DDX49, DDX42	461	33	19113	3.76908	1	0.957422	96.6254
UP_SEQ_FEATURE	short sequence motif:Q motif	3	0.646552	0.223482	DDX27, DDX49, DDX42	461	37	19113	3.36161	1	0.975202	98.3637
INTERPRO	IPR014014:RNA helicase, DEAD-box type, Q motif	3	0.646552	0.230104	DDX27, DDX49, DDX42	410	37	16659	3.29446	1	0.959375	98.0413
Annotation Cluster 19	Enrichment Score: 2.012193002529149
Category	Term	Count	%	PValue	Genes	List Total	Pop Hits	Pop Total	Fold Enrichment	Bonferroni	Benjamini	FDR
INTERPRO	IPR000571:Zinc finger, CCCH-type	8	1.72414	0.000263441	ZC3H3, ZC3H13, ZC3H7A, RC3H2, HELZ, UNK, RBM26, DHX57	410	52	16659	6.25103	0.165351	0.0441803	0.395478
SMART	SM00356:ZnF_C3H1	8	1.72414	0.000453873	ZC3H3, ZC3H13, ZC3H7A, RC3H2, HELZ, UNK, RBM26, DHX57	246	52	9079	5.67792	0.0713265	0.0243643	0.5484
UP_SEQ_FEATURE	zinc finger region:C3H1-type	5	1.07759	0.00325234	ZC3H13, RC3H2, HELZ, RBM26, DHX57	461	26	19113	7.97305	0.983342	0.2389	5.15909
UP_SEQ_FEATURE	zinc finger region:C3H1-type 3	3	0.646552	0.0825982	ZC3H3, ZC3H7A, UNK	461	20	19113	6.21898	1	0.82095	75.384
UP_SEQ_FEATURE	zinc finger region:C3H1-type 2	3	0.646552	0.162192	ZC3H3, ZC3H7A, UNK	461	30	19113	4.14599	1	0.940142	94.3723
UP_SEQ_FEATURE	zinc finger region:C3H1-type 1	3	0.646552	0.162192	ZC3H3, ZC3H7A, UNK	461	30	19113	4.14599	1	0.940142	94.3723
Annotation Cluster 20	Enrichment Score: 1.9666224614560373
Category	Term	Count	%	PValue	Genes	List Total	Pop Hits	Pop Total	Fold Enrichment	Bonferroni	Benjamini	FDR
UP_SEQ_FEATURE	metal ion-binding site:Zinc 2	7	1.50862	0.00770835	ZFP64, EHMT1, ARAF, POLR3A, USP16, EHMT2, CPSF3	461	72	19113	4.03082	0.99994	0.312101	11.823
UP_SEQ_FEATURE	metal ion-binding site:Zinc 1	7	1.50862	0.00878213	ZFP64, EHMT1, ARAF, POLR3A, USP16, EHMT2, CPSF3	461	74	19113	3.92188	0.999985	0.326991	13.3617
UP_SEQ_FEATURE	metal ion-binding site:Zinc 3	3	0.646552	0.0186025	EHMT1, USP16, EHMT2	461	9	19113	13.82	1	0.480898	26.3117
Annotation Cluster 21	Enrichment Score: 1.9545869999946415
Category	Term	Count	%	PValue	Genes	List Total	Pop Hits	Pop Total	Fold Enrichment	Bonferroni	Benjamini	FDR
PIR_SUPERFAMILY	PIRSF037869:Zinc finger and BTB domain-containing protein	4	0.862069	0.000311484	ZBTB6, ZBTB12, ZBTB26, ZBTB43	136	8	7396	27.1912	0.0498082	0.0498082	0.377046
UP_SEQ_FEATURE	domain:BTB	10	2.15517	0.00749559	ZBTB10, ZBTB6, ZBTB12, ZNF131, ZBTB5, KCTD20, ZBTB26, ZBTB43, GZF1, SPOP	461	142	19113	2.91971	0.999922	0.314973	11.515
INTERPRO	IPR013069:BTB/POZ	9	1.93966	0.01312	ZBTB10, ZBTB6, ZBTB12, ZNF131, ZBTB5, ZBTB26, ZBTB43, GZF1, SPOP	410	127	16659	2.87941	0.999884	0.350415	18.0145
INTERPRO	IPR000210:BTB/POZ-like	10	2.15517	0.0328811	ZBTB10, ZBTB6, ZBTB12, ZNF131, ZBTB5, KCTD20, ZBTB26, ZBTB43, GZF1, SPOP	410	179	16659	2.26993	1	0.500934	39.5189
INTERPRO	IPR011333:BTB/POZ fold	10	2.15517	0.0349313	ZBTB10, ZBTB6, ZBTB12, ZNF131, ZBTB5, KCTD20, ZBTB26, ZBTB43, GZF1, SPOP	410	181	16659	2.24485	1	0.501871	41.4188
SMART	SM00225:BTB	10	2.15517	0.0532284	ZBTB10, ZBTB6, ZBTB12, ZNF131, ZBTB5, KCTD20, ZBTB26, ZBTB43, GZF1, SPOP	246	179	9079	2.06182	0.999866	0.427206	48.447
Annotation Cluster 22	Enrichment Score: 1.8668477093032798
Category	Term	Count	%	PValue	Genes	List Total	Pop Hits	Pop Total	Fold Enrichment	Bonferroni	Benjamini	FDR
GOTERM_BP_FAT	GO:0006310~DNA recombination	11	2.37069	0.000265908	RPA1, LIG1, PSMC3IP, EME1, NCOA6, LIG3, PMS2, SMC6, NSMCE2, TSN, ERCC1	335	105	13528	4.2305	0.311966	0.017648	0.437456
GOTERM_BP_FAT	GO:0002562~somatic diversification of immune receptors via germline recombination within a single locus	4	0.862069	0.0205619	LIG1, LIG3, PMS2, ERCC1	335	24	13528	6.73035	1	0.361993	29.0009
GOTERM_BP_FAT	GO:0016444~somatic cell DNA recombination	4	0.862069	0.0205619	LIG1, LIG3, PMS2, ERCC1	335	24	13528	6.73035	1	0.361993	29.0009
GOTERM_BP_FAT	GO:0002200~somatic diversification of immune receptors	4	0.862069	0.0281521	LIG1, LIG3, PMS2, ERCC1	335	27	13528	5.98253	1	0.436488	37.5468
GOTERM_BP_FAT	GO:0002520~immune system development	11	2.37069	0.14635	RPA1, LIG1, BCL11A, NCOA6, LIG3, RTKN2, PMS2, CDK6, ERCC1, MED1, ERCC2	335	276	13528	1.60943	1	0.850657	92.6357
Annotation Cluster 23	Enrichment Score: 1.8306588063871
Category	Term	Count	%	PValue	Genes	List Total	Pop Hits	Pop Total	Fold Enrichment	Bonferroni	Benjamini	FDR
SP_PIR_KEYWORDS	nuclease	11	2.37069	0.000227992	PAN2, ELAC1, EIF2C2, EME1, REXO1, PMS2, EXD2, CPSF3, LOC81691, XRN2, ERCC1	461	106	19235	4.3299	0.0631322	0.0043381	0.302022
GOTERM_MF_FAT	GO:0004518~nuclease activity	11	2.37069	0.00670332	PAN2, ELAC1, EIF2C2, EME1, REXO1, PMS2, EXD2, CPSF3, LOC81691, XRN2, ERCC1	328	158	12983	2.75573	0.95705	0.0909774	9.14947
SP_PIR_KEYWORDS	Endonuclease	6	1.2931	0.0183936	ELAC1, EIF2C2, EME1, PMS2, CPSF3, ERCC1	461	64	19235	3.91167	0.995056	0.127282	21.8292
GOTERM_MF_FAT	GO:0004519~endonuclease activity	6	1.2931	0.107979	ELAC1, EIF2C2, EME1, PMS2, CPSF3, ERCC1	328	100	12983	2.37494	1	0.635411	80.4102
GOTERM_MF_FAT	GO:0004540~ribonuclease activity	4	0.862069	0.231468	PAN2, ELAC1, EIF2C2, XRN2	328	66	12983	2.39893	1	0.849767	97.6622
Annotation Cluster 24	Enrichment Score: 1.7892206572146991
Category	Term	Count	%	PValue	Genes	List Total	Pop Hits	Pop Total	Fold Enrichment	Bonferroni	Benjamini	FDR
GOTERM_BP_FAT	GO:0034470~ncRNA processing	13	2.80172	0.00236934	UTP23, TSEN54, EIF2C2, ELAC1, GAR1, HEATR1, TRNT1, TRMT12, THG1L, WDR4, WDR3, NSUN2, FTSJ2	335	187	13528	2.80731	0.964394	0.0934378	3.83509
SP_PIR_KEYWORDS	trna processing	7	1.50862	0.00527853	TRNT1, ELAC1, TSEN54, TRMT12, WDR4, THG1L, NSUN2	461	67	19235	4.35928	0.779897	0.054519	6.78005
GOTERM_BP_FAT	GO:0008033~tRNA processing	7	1.50862	0.0111256	TRNT1, ELAC1, TSEN54, TRMT12, WDR4, THG1L, NSUN2	335	76	13528	3.7194	1	0.261035	16.8427
GOTERM_BP_FAT	GO:0034660~ncRNA metabolic process	13	2.80172	0.0119507	UTP23, TSEN54, ELAC1, GAR1, HEATR1, EARS2, TRNT1, TRMT12, THG1L, WDR4, WDR3, NSUN2, FTSJ2	335	230	13528	2.28247	1	0.268776	17.9792
GOTERM_BP_FAT	GO:0006399~tRNA metabolic process	8	1.72414	0.0269666	TRNT1, ELAC1, TSEN54, TRMT12, WDR4, THG1L, NSUN2, EARS2	335	118	13528	2.73777	1	0.427096	36.279
GOTERM_BP_FAT	GO:0006400~tRNA modification	3	0.646552	0.0580726	WDR4, THG1L, NSUN2	335	16	13528	7.57164	1	0.623976	62.7033
GOTERM_BP_FAT	GO:0009451~RNA modification	4	0.862069	0.114763	WDR4, THG1L, FTSJ2, NSUN2	335	48	13528	3.36517	1	0.780572	86.5951
Annotation Cluster 25	Enrichment Score: 1.7730170483714118
Category	Term	Count	%	PValue	Genes	List Total	Pop Hits	Pop Total	Fold Enrichment	Bonferroni	Benjamini	FDR
SP_PIR_KEYWORDS	rna-binding	32	6.89655	6.9775e-06	FIP1L1, EIF2C2, GAR1, SURF6, TRA2B, KIAA0430, SETD1A, RBM6, ZNF638, HNRPLL, LOC81691, ANKRD17, TNRC6C, DDX49, RAVER1, STRBP, DHX30, NSUN2, RBM26, GEMIN5, DDX42, NOL8, IREB2, ILF3, ZFR, EARS2, TRNT1, TAF15, DCP2, KHSRP, CPSF3, CPSF1	461	540	19235	2.47256	0.00199358	0.000181399	0.00925568
INTERPRO	IPR000504:RNA recognition motif, RNP-1	12	2.58621	0.0153715	TNRC6C, TAF15, NOL8, TRA2B, RAVER1, SETD1A, KIAA0430, RBM6, ZNF638, HNRPLL, LOC81691, RBM26	410	211	16659	2.31081	0.999976	0.357752	20.7831
SMART	SM00360:RRM	12	2.58621	0.027589	TNRC6C, TAF15, NOL8, TRA2B, RAVER1, SETD1A, KIAA0430, RBM6, ZNF638, HNRPLL, LOC81691, RBM26	246	211	9079	2.09895	0.98954	0.339372	28.7438
INTERPRO	IPR012677:Nucleotide-binding, alpha-beta plait	11	2.37069	0.0378714	TNRC6C, TAF15, NOL8, TRA2B, RAVER1, SETD1A, KIAA0430, RBM6, HNRPLL, LOC81691, RBM26	410	213	16659	2.09835	1	0.511198	44.0462
UP_SEQ_FEATURE	domain:RRM	7	1.50862	0.0678407	TNRC6C, TAF15, NOL8, TRA2B, SETD1A, KIAA0430, RBM6	461	119	19113	2.43882	1	0.776136	68.0913
UP_SEQ_FEATURE	domain:RRM 1	5	1.07759	0.225925	RAVER1, ZNF638, HNRPLL, LOC81691, RBM26	461	101	19113	2.05247	1	0.974215	98.4454
UP_SEQ_FEATURE	domain:RRM 2	5	1.07759	0.225925	RAVER1, ZNF638, HNRPLL, LOC81691, RBM26	461	101	19113	2.05247	1	0.974215	98.4454
Annotation Cluster 26	Enrichment Score: 1.7043020583123585
Category	Term	Count	%	PValue	Genes	List Total	Pop Hits	Pop Total	Fold Enrichment	Bonferroni	Benjamini	FDR
GOTERM_CC_FAT	GO:0042645~mitochondrial nucleoid	5	1.07759	0.00341648	TFAM, POLRMT, MTERF, SUPV3L1, DHX30	261	31	12782	7.8989	0.619054	0.0666132	4.42902
GOTERM_CC_FAT	GO:0009295~nucleoid	5	1.07759	0.00341648	TFAM, POLRMT, MTERF, SUPV3L1, DHX30	261	31	12782	7.8989	0.619054	0.0666132	4.42902
GOTERM_CC_FAT	GO:0005739~mitochondrion	36	7.75862	0.00437018	HCCS, GRPEL2, NFS1, TACO1, CMPK2, CDS2, TFAM, MRPL13, C2ORF56, THG1L, C4ORF14, DNAJC5, SUPV3L1, MLXIP, MLLT6, DHX30, MTERFD3, SLC25A41, TOMM34, MRPL4, CRLS1, MTERF, KIAA1967, MTRF1L, ILF3, EARS2, PPIF, COQ4, TRNT1, MFN1, POLRMT, PEX11B, PTCD3, MTRF1, ARAF, SLC25A37	261	1087	12782	1.62193	0.709192	0.0790407	5.63258
GOTERM_BP_FAT	GO:0006390~transcription from mitochondrial promoter	3	0.646552	0.00853637	TFAM, POLRMT, MTERF	335	6	13528	20.191	0.999994	0.210493	13.1796
GOTERM_CC_FAT	GO:0031980~mitochondrial lumen	11	2.37069	0.0178543	PPIF, TFAM, GRPEL2, POLRMT, MRPL13, MTERF, NFS1, KIAA1967, SUPV3L1, DHX30, EARS2	261	227	12782	2.37315	0.993783	0.206203	21.2168
GOTERM_CC_FAT	GO:0005759~mitochondrial matrix	11	2.37069	0.0178543	PPIF, TFAM, GRPEL2, POLRMT, MRPL13, MTERF, NFS1, KIAA1967, SUPV3L1, DHX30, EARS2	261	227	12782	2.37315	0.993783	0.206203	21.2168
GOTERM_CC_FAT	GO:0044429~mitochondrial part	20	4.31034	0.0349234	HCCS, GRPEL2, CRLS1, MTERF, NFS1, KIAA1967, EARS2, CDS2, PPIF, POLRMT, TFAM, MFN1, MRPL13, C4ORF14, SLC25A37, MLXIP, SUPV3L1, DHX30, TOMM34, SLC25A41	261	595	12782	1.64616	0.999956	0.319928	37.5336
SP_PIR_KEYWORDS	mitochondrion	28	6.03448	0.0686452	HCCS, GRPEL2, NFS1, TACO1, CMPK2, CDS2, TFAM, MRPL13, C2ORF56, SUPV3L1, MLXIP, DHX30, MTERFD3, SLC25A41, TOMM34, MRPL4, CRLS1, MTERF, MTRF1L, EARS2, TRNT1, COQ4, PPIF, POLRMT, MFN1, PTCD3, MTRF1, SLC25A37	461	832	19235	1.40419	1	0.339712	61.0692
UP_SEQ_FEATURE	transit peptide:Mitochondrion	16	3.44828	0.158393	GRPEL2, MTERF, NFS1, MTRF1L, EARS2, CMPK2, TRNT1, COQ4, PPIF, POLRMT, TFAM, PTCD3, MTRF1, C2ORF56, SUPV3L1, MTERFD3	461	467	19113	1.42047	1	0.937897	93.9427
SP_PIR_KEYWORDS	transit peptide	16	3.44828	0.17183	GRPEL2, MTERF, NFS1, MTRF1L, EARS2, CMPK2, TRNT1, COQ4, PPIF, POLRMT, TFAM, PTCD3, MTRF1, C2ORF56, SUPV3L1, MTERFD3	461	476	19235	1.4025	1	0.586856	91.8001
Annotation Cluster 27	Enrichment Score: 1.703581521966283
Category	Term	Count	%	PValue	Genes	List Total	Pop Hits	Pop Total	Fold Enrichment	Bonferroni	Benjamini	FDR
GOTERM_CC_FAT	GO:0044427~chromosomal part	17	3.66379	0.00564848	NUP133, UPF1, DSN1, CREBBP, NUP85, CBX1, POT1, SUZ12, MSL3, RPA1, RFC4, CSNK2A1, RIF1, CHD6, NUP43, MPHOSPH8, ERCC1	261	386	12782	2.15685	0.797575	0.0950148	7.22381
GOTERM_CC_FAT	GO:0005694~chromosome	19	4.09483	0.00615528	SETDB1, NUP133, UPF1, DSN1, CREBBP, SMC6, NUP85, CBX1, POT1, SUZ12, MSL3, RPA1, RFC4, CSNK2A1, RIF1, CHD6, NUP43, MPHOSPH8, ERCC1	261	460	12782	2.02281	0.824682	0.0973503	7.84778
GOTERM_CC_FAT	GO:0000785~chromatin	7	1.50862	0.222883	MSL3, SUZ12, CSNK2A1, UPF1, CBX1, CHD6, MPHOSPH8	261	200	12782	1.71406	1	0.779748	96.4487
Annotation Cluster 28	Enrichment Score: 1.6913288738168353
Category	Term	Count	%	PValue	Genes	List Total	Pop Hits	Pop Total	Fold Enrichment	Bonferroni	Benjamini	FDR
INTERPRO	IPR019786:Zinc finger, PHD-type, conserved site	9	1.93966	0.0020371	ING3, PHF2, PHF14, ASXL1, NFXL1, PHF20L1, MLLT6, MLL4, PHF6	410	93	16659	3.9321	0.753125	0.160425	3.02033
INTERPRO	IPR001965:Zinc finger, PHD-type	8	1.72414	0.00665206	ING3, PHF2, PHF14, PHF20L1, MLLT6, MLL4, PHF6, MLL2	410	90	16659	3.61171	0.98973	0.278945	9.55065
SMART	SM00249:PHD	8	1.72414	0.0106887	ING3, PHF2, PHF14, PHF20L1, MLLT6, MLL4, PHF6, MLL2	246	90	9079	3.28058	0.82651	0.196642	12.2055
INTERPRO	IPR019787:Zinc finger, PHD-finger	7	1.50862	0.0181544	ING3, PHF2, PHF14, PHF20L1, MLLT6, MLL4, MLL2	410	85	16659	3.34614	0.999997	0.372176	24.0844
UP_SEQ_FEATURE	zinc finger region:PHD-type 2	4	0.862069	0.0347708	PHF14, MLLT6, MLL4, MLL2	461	30	19113	5.52798	1	0.604169	43.7541
UP_SEQ_FEATURE	zinc finger region:PHD-type 1	4	0.862069	0.0443417	PHF14, MLLT6, MLL4, MLL2	461	33	19113	5.02544	1	0.665918	52.1678
UP_SEQ_FEATURE	zinc finger region:PHD-type	3	0.646552	0.357104	ING3, PHF2, PHF20L1	461	52	19113	2.39192	1	0.994427	99.9241
Annotation Cluster 29	Enrichment Score: 1.6830458977691525
Category	Term	Count	%	PValue	Genes	List Total	Pop Hits	Pop Total	Fold Enrichment	Bonferroni	Benjamini	FDR
GOTERM_MF_FAT	GO:0016407~acetyltransferase activity	8	1.72414	0.00455793	KAT2A, CSRP2BP, ING3, NCOA3, CREBBP, NAA16, SRCAP, AGPAT1	328	82	12983	3.86169	0.882108	0.0710717	6.30958
GOTERM_MF_FAT	GO:0008080~N-acetyltransferase activity	7	1.50862	0.00772197	KAT2A, CSRP2BP, ING3, NCOA3, CREBBP, SRCAP, AGPAT1	328	69	12983	4.0156	0.973428	0.101208	10.4697
GOTERM_MF_FAT	GO:0004402~histone acetyltransferase activity	5	1.07759	0.0148655	KAT2A, ING3, NCOA3, CREBBP, SRCAP	328	38	12983	5.2082	0.999097	0.153705	19.2385
GOTERM_MF_FAT	GO:0004468~lysine N-acetyltransferase activity	5	1.07759	0.0148655	KAT2A, ING3, NCOA3, CREBBP, SRCAP	328	38	12983	5.2082	0.999097	0.153705	19.2385
GOTERM_MF_FAT	GO:0016410~N-acyltransferase activity	7	1.50862	0.018186	KAT2A, CSRP2BP, ING3, NCOA3, CREBBP, SRCAP, AGPAT1	328	83	12983	3.33827	0.999814	0.181067	23.0364
GOTERM_CC_FAT	GO:0000123~histone acetyltransferase complex	5	1.07759	0.0185319	KAT2A, TAF2, ING3, CREBBP, ATXN7L3	261	50	12782	4.89732	0.994882	0.204949	21.9332
GOTERM_BP_FAT	GO:0006473~protein amino acid acetylation	5	1.07759	0.0390891	KAT2A, CSRP2BP, ING3, CREBBP, NAA16	335	52	13528	3.88289	1	0.517166	48.1766
GOTERM_BP_FAT	GO:0043543~protein amino acid acylation	5	1.07759	0.0605646	KAT2A, CSRP2BP, ING3, CREBBP, NAA16	335	60	13528	3.36517	1	0.619128	64.2971
GOTERM_BP_FAT	GO:0016573~histone acetylation	4	0.862069	0.114763	KAT2A, CSRP2BP, ING3, CREBBP	335	48	13528	3.36517	1	0.780572	86.5951
Annotation Cluster 30	Enrichment Score: 1.6534951547485655
Category	Term	Count	%	PValue	Genes	List Total	Pop Hits	Pop Total	Fold Enrichment	Bonferroni	Benjamini	FDR
GOTERM_MF_FAT	GO:0003899~DNA-directed RNA polymerase activity	6	1.2931	0.00431704	CD3EAP, POLR3F, POLRMT, POLR1A, POLR3A, CTDP1	328	43	12983	5.52311	0.867973	0.0697597	5.98559
GOTERM_MF_FAT	GO:0034062~RNA polymerase activity	6	1.2931	0.00431704	CD3EAP, POLR3F, POLRMT, POLR1A, POLR3A, CTDP1	328	43	12983	5.52311	0.867973	0.0697597	5.98559
SP_PIR_KEYWORDS	dna-directed rna polymerase	5	1.07759	0.0114295	CD3EAP, POLR3F, POLRMT, POLR1A, POLR3A	461	37	19235	5.63845	0.962659	0.0948242	14.1434
GOTERM_MF_FAT	GO:0016779~nucleotidyltransferase activity	9	1.93966	0.0137239	TRNT1, CDS2, CD3EAP, POLR3F, POLRMT, POLR1A, THG1L, POLR3A, CTDP1	328	125	12983	2.84993	0.998447	0.145927	17.8931
GOTERM_CC_FAT	GO:0000428~DNA-directed RNA polymerase complex	4	0.862069	0.0137476	CD3EAP, POLR3F, POLR1A, POLR3A	261	25	12782	7.83571	0.979833	0.185726	16.7429
GOTERM_CC_FAT	GO:0055029~nuclear DNA-directed RNA polymerase complex	4	0.862069	0.0137476	CD3EAP, POLR3F, POLR1A, POLR3A	261	25	12782	7.83571	0.979833	0.185726	16.7429
GOTERM_CC_FAT	GO:0030880~RNA polymerase complex	4	0.862069	0.0153115	CD3EAP, POLR3F, POLR1A, POLR3A	261	26	12782	7.53434	0.987109	0.195522	18.4736
SP_PIR_KEYWORDS	nucleotidyltransferase	6	1.2931	0.035432	TRNT1, CDS2, POLRMT, POLR1A, THG1L, POLR3A	461	76	19235	3.29404	0.999967	0.209023	38.0322
KEGG_PATHWAY	hsa00240:Pyrimidine metabolism	5	1.07759	0.0868319	POLR3F, POLR1A, CAD, POLR3A, CMPK2	91	95	5085	2.94101	0.999864	0.719644	63.3727
KEGG_PATHWAY	hsa03020:RNA polymerase	3	0.646552	0.0870491	POLR3F, POLR1A, POLR3A	91	28	5085	5.98705	0.999867	0.672297	63.4689
KEGG_PATHWAY	hsa00230:Purine metabolism	5	1.07759	0.286002	POLR3F, POLR1A, POLR3A, IMPDH1, PPAT	91	153	5085	1.82612	1	0.856581	97.5883
Annotation Cluster 31	Enrichment Score: 1.6178477878207749
Category	Term	Count	%	PValue	Genes	List Total	Pop Hits	Pop Total	Fold Enrichment	Bonferroni	Benjamini	FDR
INTERPRO	IPR018359:Bromodomain, conserved site	5	1.07759	0.0113417	KAT2A, BRD3, CREBBP, ATAD2, BRD4	410	36	16659	5.64329	0.9996	0.35255	15.7643
SP_PIR_KEYWORDS	bromodomain	5	1.07759	0.0137137	KAT2A, BRD3, CREBBP, ATAD2, BRD4	461	39	19235	5.3493	0.980731	0.106703	16.7381
INTERPRO	IPR001487:Bromodomain	5	1.07759	0.0163029	KAT2A, BRD3, CREBBP, ATAD2, BRD4	410	40	16659	5.07896	0.999987	0.351887	21.9026
SMART	SM00297:BROMO	5	1.07759	0.0221012	KAT2A, BRD3, CREBBP, ATAD2, BRD4	246	40	9079	4.61331	0.973824	0.305311	23.7169
UP_SEQ_FEATURE	domain:Bromo	3	0.646552	0.145294	KAT2A, CREBBP, ATAD2	461	28	19113	4.44213	1	0.925477	92.2135
Annotation Cluster 32	Enrichment Score: 1.5982236561670908
Category	Term	Count	%	PValue	Genes	List Total	Pop Hits	Pop Total	Fold Enrichment	Bonferroni	Benjamini	FDR
SP_PIR_KEYWORDS	activator	29	6.25	6.02119e-05	ELF2, SETD1A, MED24, MED22, TACO1, C10ORF137, PNN, TFAM, HSF1, HSF2, ZNF326, ECD, CEBPZ, MLLT1, MLXIP, VEZF1, USP16, YY1, CREBBP, MED12, ATAD2, ATXN7L3, ATF5, MED7, NCOA3, NCOA6, USP21, SRCAP, MED1	461	520	19235	2.32694	0.0170737	0.00132382	0.0798451
GOTERM_MF_FAT	GO:0003713~transcription coactivator activity	17	3.66379	0.0001042	KAT2A, YY1, CREBBP, MED12, MED24, ARID1B, ATXN7L3, TAF11, MED7, NCOA3, HSF2, ECD, NCOA6, USP21, USP16, SRCAP, MED1	328	214	12983	3.14439	0.0475979	0.00694263	0.148553
GOTERM_MF_FAT	GO:0003712~transcription cofactor activity	22	4.74138	0.000353995	KAT2A, YY1, CREBBP, MED12, MED24, ARID1B, SIRT1, CBFA2T2, ATXN7L3, TAF11, MED7, ATF5, PIAS4, NCOA3, HSF2, BCL11A, NCOA6, ECD, USP21, USP16, SRCAP, MED1	328	363	12983	2.39893	0.152699	0.0149507	0.503841
GOTERM_MF_FAT	GO:0008134~transcription factor binding	26	5.60345	0.00125165	MED24, CBFA2T2, HSF2, PSMC3IP, BCL11A, ECD, USP16, KAT2A, RNF19A, YY1, CREBBP, MED12, ARID1B, SIRT1, ATXN7L3, TAF11, ATF5, MED7, PIAS4, NCOA3, UBA2, NCOA6, USP21, JMJD1C, SRCAP, MED1	328	513	12983	2.00612	0.443528	0.0338911	1.77091
GOTERM_MF_FAT	GO:0016563~transcription activator activity	20	4.31034	0.00794105	KAT2A, ELF2, YY1, CREBBP, MED12, MED24, ILF3, ARID1B, ATXN7L3, TAF11, MED7, NCOA3, HSF2, NCOA6, ECD, USP21, USP16, SRCAP, MED1, ERCC2	328	410	12983	1.93084	0.976037	0.101121	10.7513
GOTERM_BP_FAT	GO:0051254~positive regulation of RNA metabolic process	19	4.09483	0.0534312	TAF2, DVL3, CREBBP, MED12, NAA16, ILF3, ARID1B, HNRPLL, ATXN7L3, NCOA3, MAPK14, PSMC3IP, NCOA6, USP21, USP16, ASF1A, MLL4, MED1, ERCC2	335	481	13528	1.59513	1	0.605521	59.5553
GOTERM_BP_FAT	GO:0045935~positive regulation of nucleobase, nucleoside, nucleotide and nucleic acid metabolic process	23	4.9569	0.0593751	TAF2, DVL3, CREBBP, MED12, NAA16, ILF3, ARID1B, HNRPLL, POT1, UIMC1, ATXN7L3, TAF11, MED7, NCOA3, MAPK14, PSMC3IP, NCOA6, USP21, USP16, ASF1A, MLL4, ERCC2, MED1	335	624	13528	1.48844	1	0.615668	63.5445
GOTERM_BP_FAT	GO:0051173~positive regulation of nitrogen compound metabolic process	23	4.9569	0.077905	TAF2, DVL3, CREBBP, MED12, NAA16, ILF3, ARID1B, HNRPLL, POT1, UIMC1, ATXN7L3, TAF11, MED7, NCOA3, MAPK14, PSMC3IP, NCOA6, USP21, USP16, ASF1A, MLL4, ERCC2, MED1	335	644	13528	1.44222	1	0.698921	73.7386
GOTERM_BP_FAT	GO:0010604~positive regulation of macromolecule metabolic process	29	6.25	0.0790798	NAA16, HNRPLL, POT1, SCRIB, PSMC3IP, USP16, ASF1A, MLL4, ERCC2, TAF2, DVL3, CREBBP, MED12, CDC23, ILF3, RICTOR, ARID1B, UIMC1, ATXN7L3, TAF11, MED7, NCOA3, PSMD12, PIAS4, MAPK14, NCOA6, USP21, ANAPC7, MED1	335	857	13528	1.36649	1	0.700773	74.2848
GOTERM_BP_FAT	GO:0045893~positive regulation of transcription, DNA-dependent	18	3.87931	0.0823452	TAF2, DVL3, CREBBP, MED12, NAA16, ILF3, ARID1B, ATXN7L3, NCOA3, MAPK14, PSMC3IP, NCOA6, USP21, USP16, ASF1A, MLL4, MED1, ERCC2	335	477	13528	1.52385	1	0.708551	75.7474
GOTERM_BP_FAT	GO:0045941~positive regulation of transcription	20	4.31034	0.106086	TAF2, DVL3, CREBBP, MED12, NAA16, ILF3, ARID1B, ATXN7L3, TAF11, MED7, NCOA3, MAPK14, PSMC3IP, NCOA6, USP21, USP16, ASF1A, MLL4, ERCC2, MED1	335	564	13528	1.43199	1	0.75841	84.2567
GOTERM_BP_FAT	GO:0010628~positive regulation of gene expression	20	4.31034	0.129582	TAF2, DVL3, CREBBP, MED12, NAA16, ILF3, ARID1B, ATXN7L3, TAF11, MED7, NCOA3, MAPK14, PSMC3IP, NCOA6, USP21, USP16, ASF1A, MLL4, ERCC2, MED1	335	581	13528	1.39009	1	0.814022	89.8516
GOTERM_MF_FAT	GO:0030528~transcription regulator activity	46	9.91379	0.132156	CNOT8, ELF2, ZNF131, MED24, ZNF35, ZNF202, MED22, NFXL1, CBFA2T2, TFAM, HSF1, HSF2, BCL11A, ECD, MLLT1, MLXIP, USP16, VEZF1, ZNF496, MLL4, ERCC2, KAT2A, MTERF, YY1, ZHX1, CREBBP, MED12, ATAD2, ILF3, ARID1B, SIRT1, ATXN7L3, ZNF192, TAF11, MSL3, MED7, ATF5, ZNF236, ADNP2, NCOA3, PIAS4, NCOA6, USP21, SRCAP, MED1, SUPT6H	328	1512	12983	1.20422	1	0.681369	86.7633
GOTERM_BP_FAT	GO:0010557~positive regulation of macromolecule biosynthetic process	21	4.52586	0.190416	TAF2, DVL3, CREBBP, MED12, NAA16, ILF3, ARID1B, POT1, ATXN7L3, TAF11, MED7, NCOA3, MAPK14, PSMC3IP, NCOA6, USP21, USP16, ASF1A, MLL4, ERCC2, MED1	335	654	13528	1.29667	1	0.910597	96.9262
GOTERM_BP_FAT	GO:0031328~positive regulation of cellular biosynthetic process	21	4.52586	0.249864	TAF2, DVL3, CREBBP, MED12, NAA16, ILF3, ARID1B, POT1, ATXN7L3, TAF11, MED7, NCOA3, MAPK14, PSMC3IP, NCOA6, USP21, USP16, ASF1A, MLL4, ERCC2, MED1	335	685	13528	1.23799	1	0.946559	99.1257
GOTERM_BP_FAT	GO:0009891~positive regulation of biosynthetic process	21	4.52586	0.270402	TAF2, DVL3, CREBBP, MED12, NAA16, ILF3, ARID1B, POT1, ATXN7L3, TAF11, MED7, NCOA3, MAPK14, PSMC3IP, NCOA6, USP21, USP16, ASF1A, MLL4, ERCC2, MED1	335	695	13528	1.22018	1	0.951974	99.4468
GOTERM_BP_FAT	GO:0045944~positive regulation of transcription from RNA polymerase II promoter	8	1.72414	0.814556	TAF2, MAPK14, PSMC3IP, NCOA6, CREBBP, MED12, MED1, ERCC2	335	371	13528	0.870773	1	0.999835	100
Annotation Cluster 33	Enrichment Score: 1.5846239669082445
Category	Term	Count	%	PValue	Genes	List Total	Pop Hits	Pop Total	Fold Enrichment	Bonferroni	Benjamini	FDR
GOTERM_BP_FAT	GO:0006260~DNA replication	13	2.80172	0.00270179	MCM3AP, UPF1, NOL8, LIG1, LIG3, SIRT1, POT1, RPA1, TFAM, MCM8, RFC4, NCOA6, MED1	335	190	13528	2.76299	0.977715	0.102984	4.362
INTERPRO	IPR012340:Nucleic acid-binding, OB-fold	5	1.07759	0.04084	RPA1, MCM8, LIG1, LIG3, POT1	410	53	16659	3.83318	1	0.519748	46.5873
SP_PIR_KEYWORDS	dna replication	5	1.07759	0.159732	RPA1, MCM8, RFC4, LIG1, LIG3	461	88	19235	2.37071	1	0.576063	90.0607
Annotation Cluster 34	Enrichment Score: 1.5715896741941762
Category	Term	Count	%	PValue	Genes	List Total	Pop Hits	Pop Total	Fold Enrichment	Bonferroni	Benjamini	FDR
INTERPRO	IPR015880:Zinc finger, C2H2-like	41	8.83621	1.48078e-05	ZFP64, ZBTB10, ZBTB6, ZBTB12, ZNF131, RBM6, ZNF202, ZNF35, ZNF638, ZFYVE20, ZNF518A, ZNF16, ZNF828, ZNF304, ZNF326, ZNF300, USP39, BCL11A, ZNF407, ZFAT, VEZF1, ZNF470, ZNF606, ZNF496, ZC3H7A, POGZ, ZNF646, YY1, ZHX1, ZNF687, ZBTB26, ZFP28, ZFR, ZBTB43, GZF1, SUZ12, ZNF192, ZNF236, ZNF341, ADNP2, ZBTB5	410	797	16659	2.09021	0.0101068	0.0101068	0.0222684
INTERPRO	IPR007087:Zinc finger, C2H2-type	39	8.40517	5.14419e-05	ZFP64, ZBTB10, ZBTB6, ZBTB12, ZNF131, ZNF202, ZNF35, C20ORF194, ZNF638, ZFYVE20, ZNF518A, ZNF16, ZNF828, ZNF304, ZNF300, BCL11A, ZNF407, ZFAT, VEZF1, ZNF470, ZNF606, ZNF496, ZC3H7A, POGZ, ZNF646, YY1, ZHX1, ZNF687, ZFP28, ZBTB26, ZFR, ZBTB43, GZF1, SUZ12, ZNF192, ZNF236, ZNF341, ADNP2, ZBTB5	410	784	16659	2.02122	0.0346746	0.0174903	0.0773398
SMART	SM00355:ZnF_C2H2	41	8.83621	8.29336e-05	ZFP64, ZBTB10, ZBTB6, ZBTB12, ZNF131, RBM6, ZNF202, ZNF35, ZNF638, ZFYVE20, ZNF518A, ZNF16, ZNF828, ZNF304, ZNF326, ZNF300, USP39, BCL11A, ZNF407, ZFAT, VEZF1, ZNF470, ZNF606, ZNF496, ZC3H7A, POGZ, ZNF646, YY1, ZHX1, ZNF687, ZBTB26, ZFP28, ZFR, ZBTB43, GZF1, SUZ12, ZNF192, ZNF236, ZNF341, ADNP2, ZBTB5	246	797	9079	1.89858	0.0134278	0.0134278	0.100413
UP_SEQ_FEATURE	zinc finger region:C2H2-type 4	26	5.60345	0.00344537	ZFP64, ZBTB6, ZBTB12, ZNF202, ZNF35, ZNF518A, ZNF16, ZNF304, ZNF300, BCL11A, ZNF407, ZFAT, VEZF1, ZNF470, ZNF606, ZNF496, POGZ, YY1, ZNF687, ZFP28, ZBTB26, GZF1, ZNF192, ZNF236, ADNP2, ZNF341	461	575	19113	1.87471	0.986941	0.225235	5.4573
UP_SEQ_FEATURE	zinc finger region:C2H2-type 2	27	5.81897	0.00354285	ZFP64, ZBTB6, ZBTB10, ZNF131, ZBTB12, ZNF202, ZNF35, ZNF518A, ZNF304, ZNF300, BCL11A, ZNF407, VEZF1, ZNF470, ZNF496, POGZ, YY1, ZHX1, ZNF687, ZFP28, ZBTB26, ZBTB43, GZF1, ZNF192, ZNF236, ADNP2, ZNF341	461	608	19113	1.84115	0.988452	0.219522	5.60755
UP_SEQ_FEATURE	zinc finger region:C2H2-type 1	24	5.17241	0.00645829	ZFP64, ZBTB6, ZBTB10, YY1, ZHX1, ZNF131, ZBTB12, ZNF35, ZNF202, ZNF518A, ZFP28, ZBTB26, GZF1, ZNF192, ZNF304, ADNP2, ZNF236, ZNF300, BCL11A, ZNF407, ZBTB5, ZFAT, VEZF1, ZNF470	461	542	19113	1.83586	0.99971	0.287767	9.99929
SP_PIR_KEYWORDS	dna-binding	62	13.3621	0.00753485	ELF2, SURF6, ZNF202, ZNF638, ZNF518A, ZNF16, PNN, PHC3, ZNF304, MCM8, HSF1, HSF2, ZNF300, PSMC3IP, ZNF407, RC3H2, ZFAT, ZNF496, MLL4, MTERF, YY1, ZHX1, ZNF687, ARID1B, ZBTB26, ZFP28, ZFR, GZF1, ZNF192, ZNF236, ZNF341, TAF15, PIAS4, HUWE1, KHSRP, SRCAP, MED1, ZFP64, ZBTB6, ZBTB10, ZBTB12, ZNF131, ZNF35, CIC, POT1, RPA1, TFAM, ZNF326, MLXIP, STRBP, CHD6, VEZF1, ZNF606, ZNF470, ERCC1, ERCC2, ILF3, T…	461	1868	19235	1.38486	0.885035	0.0718766	9.54636
UP_SEQ_FEATURE	zinc finger region:C2H2-type 3	26	5.60345	0.00901519	ZFP64, ZBTB6, ZNF131, ZBTB12, ZNF202, ZNF35, ZNF518A, ZNF16, ZNF304, ZNF300, BCL11A, ZNF407, ZFAT, VEZF1, ZNF470, ZNF496, POGZ, YY1, ZNF687, ZFP28, ZBTB26, GZF1, ZNF192, ZNF236, ADNP2, ZNF341	461	622	19113	1.73305	0.999989	0.324656	13.6924
INTERPRO	IPR013087:Zinc finger, C2H2-type/integrase, DNA-binding	25	5.38793	0.0192726	ZFP64, ZBTB6, ZBTB10, ZNF202, ZNF35, ZNF16, ZNF304, ZNF300, BCL11A, ZNF407, ZFAT, VEZF1, ZNF470, ZNF606, ZNF496, ZNF646, YY1, ZFP28, ZBTB26, ZBTB43, GZF1, ZNF192, ZNF341, ZNF236, ZBTB5	410	621	16659	1.63574	0.999998	0.379226	25.3744
UP_SEQ_FEATURE	zinc finger region:C2H2-type 5	22	4.74138	0.020995	ZFP64, POGZ, ZNF131, ZNF35, ZNF687, ZNF202, ZNF518A, ZFP28, ZNF16, GZF1, ZNF192, ZNF304, ZNF236, ZNF341, ZNF300, BCL11A, ZNF407, ZFAT, VEZF1, ZNF496, ZNF606, ZNF470	461	538	19113	1.69539	1	0.504351	29.179
UP_SEQ_FEATURE	zinc finger region:C2H2-type 6	20	4.31034	0.0279137	ZFP64, POGZ, ZNF131, ZNF35, ZNF687, ZNF202, ZFP28, ZNF16, GZF1, ZNF192, ZNF304, ZNF341, ZNF236, ZNF300, BCL11A, ZNF407, ZFAT, VEZF1, ZNF606, ZNF470	461	488	19113	1.69917	1	0.5629	36.8926
UP_SEQ_FEATURE	zinc finger region:C2H2-type 16	7	1.50862	0.0381948	ZNF304, ZNF236, ZNF407, ZFAT, ZNF606, ZNF16, ZNF470	461	103	19113	2.81766	1	0.624327	46.912
UP_SEQ_FEATURE	zinc finger region:C2H2-type 9	16	3.44828	0.0397388	ZFP64, POGZ, ZNF687, ZNF35, ZFP28, ZNF16, GZF1, ZNF192, ZNF304, ZNF341, ZNF236, ZNF300, ZNF407, ZFAT, ZNF606, ZNF470	461	376	19113	1.76425	1	0.631914	48.2809
UP_SEQ_FEATURE	zinc finger region:C2H2-type 8	17	3.66379	0.0460666	ZFP64, POGZ, ZNF687, ZNF35, ZNF202, ZFP28, ZNF16, GZF1, ZNF192, ZNF304, ZNF341, ZNF236, ZNF300, ZNF407, ZFAT, ZNF606, ZNF470	461	417	19113	1.69021	1	0.673239	53.5525
UP_SEQ_FEATURE	zinc finger region:C2H2-type 10	14	3.01724	0.0618045	ZFP64, ZNF35, ZNF687, ZFP28, ZNF16, GZF1, ZNF304, ZNF341, ZNF236, ZNF300, ZNF407, ZFAT, ZNF606, ZNF470	461	334	19113	1.73784	1	0.761172	64.5604
UP_SEQ_FEATURE	zinc finger region:C2H2-type 7	17	3.66379	0.080627	ZFP64, POGZ, ZNF687, ZNF35, ZNF202, ZFP28, ZNF16, GZF1, ZNF192, ZNF304, ZNF341, ZNF236, ZNF300, ZNF407, ZFAT, ZNF606, ZNF470	461	451	19113	1.56279	1	0.818103	74.5097
UP_SEQ_FEATURE	zinc finger region:C2H2-type 12	11	2.37069	0.0846634	ZNF304, ZNF341, ZNF236, ZFP64, ZNF300, ZNF407, ZFAT, ZFP28, ZNF606, ZNF16, ZNF470	461	252	19113	1.80976	1	0.819269	76.2697
UP_SEQ_FEATURE	zinc finger region:C2H2-type 11	12	2.58621	0.0982302	ZNF304, ZNF341, ZNF236, ZFP64, ZNF300, ZNF407, ZNF35, ZFAT, ZFP28, ZNF606, ZNF16, ZNF470	461	293	19113	1.69802	1	0.852113	81.3854
UP_SEQ_FEATURE	zinc finger region:C2H2-type 15	7	1.50862	0.105043	ZNF304, ZNF236, ZNF407, ZFAT, ZNF606, ZNF16, ZNF470	461	134	19113	2.16581	1	0.863697	83.5448
UP_SEQ_FEATURE	zinc finger region:C2H2-type 13	9	1.93966	0.113518	ZNF304, ZNF236, ZFP64, ZNF407, ZFAT, ZFP28, ZNF606, ZNF16, ZNF470	461	201	19113	1.85641	1	0.877988	85.9035
UP_SEQ_FEATURE	zinc finger region:C2H2-type 17	5	1.07759	0.139816	ZNF236, ZNF407, ZFAT, ZNF16, ZNF470	461	83	19113	2.49758	1	0.919879	91.3613
UP_SEQ_FEATURE	zinc finger region:C2H2-type 14	6	1.2931	0.327258	ZNF304, ZNF236, ZFP28, ZNF606, ZNF16, ZNF470	461	157	19113	1.58445	1	0.991696	99.8412
UP_SEQ_FEATURE	zinc finger region:C2H2-type 19	3	0.646552	0.38309	ZNF236, ZNF407, ZFAT	461	55	19113	2.26145	1	0.995789	99.9612
UP_SEQ_FEATURE	zinc finger region:C2H2-type 18	3	0.646552	0.473975	ZNF236, ZNF407, ZFAT	461	66	19113	1.88454	1	0.999052	99.9971
UP_SEQ_FEATURE	zinc finger region:C2H2-type 2; degenerate	3	0.646552	0.512549	ZFAT, ZNF606, ZNF16	461	71	19113	1.75183	1	0.999462	99.9992
INTERPRO	IPR001909:Krueppel-associated box	8	1.72414	0.77236	ZNF192, ZNF304, ZNF300, ZNF202, ZFP28, ZNF606, ZNF496, ZNF470	410	355	16659	0.915644	1	0.999999	100
SMART	SM00349:KRAB	8	1.72414	0.849905	ZNF192, ZNF304, ZNF300, ZNF202, ZFP28, ZNF606, ZNF496, ZNF470	246	355	9079	0.831696	1	0.999953	100
Annotation Cluster 35	Enrichment Score: 1.5590965760391506
Category	Term	Count	%	PValue	Genes	List Total	Pop Hits	Pop Total	Fold Enrichment	Bonferroni	Benjamini	FDR
INTERPRO	IPR013026:Tetratricopeptide region	9	1.93966	0.00998454	CRNKL1, C6ORF35, SPAG1, CDC23, NAA16, ANAPC7, SGTA, TTC3, TOMM34	410	121	16659	3.02219	0.998976	0.332977	14.0084
UP_SEQ_FEATURE	repeat:TPR 1	10	2.15517	0.01098	ZC3H7A, C6ORF35, SPAG1, CDC23, NAA16, ANAPC7, SGTA, TTC3, C10ORF137, TOMM34	461	151	19113	2.74569	0.999999	0.37036	16.4331
UP_SEQ_FEATURE	repeat:TPR 2	10	2.15517	0.01098	ZC3H7A, C6ORF35, SPAG1, CDC23, NAA16, ANAPC7, SGTA, TTC3, C10ORF137, TOMM34	461	151	19113	2.74569	0.999999	0.37036	16.4331
INTERPRO	IPR001440:Tetratricopeptide TPR-1	8	1.72414	0.0115897	C6ORF35, SPAG1, CDC23, NAA16, ANAPC7, SGTA, TTC3, TOMM34	410	100	16659	3.25054	0.999664	0.34354	16.0816
SP_PIR_KEYWORDS	tpr repeat	10	2.15517	0.014989	ZC3H7A, C6ORF35, SPAG1, CDC23, NAA16, ANAPC7, SGTA, TTC3, C10ORF137, TOMM34	461	160	19235	2.60778	0.986691	0.113062	18.155
INTERPRO	IPR011990:Tetratricopeptide-like helical	10	2.15517	0.0155708	CRNKL1, ZC3H7A, C6ORF35, SPAG1, CDC23, NAA16, ANAPC7, SGTA, TTC3, TOMM34	410	157	16659	2.58801	0.999979	0.349897	21.0239
UP_SEQ_FEATURE	repeat:TPR 3	9	1.93966	0.018634	ZC3H7A, C6ORF35, SPAG1, CDC23, NAA16, ANAPC7, SGTA, TTC3, TOMM34	461	138	19113	2.7039	1	0.472194	26.3502
UP_SEQ_FEATURE	repeat:TPR 6	6	1.2931	0.0238574	C6ORF35, SPAG1, CDC23, NAA16, ANAPC7, TOMM34	461	68	19113	3.65822	1	0.523029	32.4718
INTERPRO	IPR019734:Tetratricopeptide repeat	8	1.72414	0.0253198	C6ORF35, SPAG1, CDC23, NAA16, ANAPC7, SGTA, TTC3, TOMM34	410	117	16659	2.77824	1	0.43307	32.0032
UP_SEQ_FEATURE	repeat:TPR 4	7	1.50862	0.0296991	C6ORF35, SPAG1, CDC23, NAA16, ANAPC7, TTC3, TOMM34	461	97	19113	2.99195	1	0.577389	38.7511
UP_SEQ_FEATURE	repeat:TPR 5	6	1.2931	0.0362601	C6ORF35, SPAG1, CDC23, NAA16, ANAPC7, TOMM34	461	76	19113	3.27315	1	0.612278	45.1488
SMART	SM00028:TPR	8	1.72414	0.0372605	C6ORF35, SPAG1, CDC23, NAA16, ANAPC7, SGTA, TTC3, TOMM34	246	116	9079	2.54528	0.997949	0.378809	36.8696
UP_SEQ_FEATURE	repeat:TPR 7	5	1.07759	0.0534979	C6ORF35, SPAG1, CDC23, NAA16, ANAPC7	461	59	19113	3.51355	1	0.721924	59.0988
UP_SEQ_FEATURE	repeat:TPR 9	3	0.646552	0.162192	C6ORF35, SPAG1, CDC23	461	30	19113	4.14599	1	0.940142	94.3723
UP_SEQ_FEATURE	repeat:TPR 8	3	0.646552	0.321874	C6ORF35, SPAG1, CDC23	461	48	19113	2.59124	1	0.992046	99.8192
Annotation Cluster 36	Enrichment Score: 1.5543253803835002
Category	Term	Count	%	PValue	Genes	List Total	Pop Hits	Pop Total	Fold Enrichment	Bonferroni	Benjamini	FDR
INTERPRO	IPR015943:WD40/YVTN repeat-like	16	3.44828	0.00746787	PAN2, NUP133, STRN4, WDR81, PWP2, RPTOR, NUP214, MIOS, DCAF7, RAE1, WDR4, WDR3, WDR44, NUP43, CSTF1, GEMIN5	410	300	16659	2.16702	0.994155	0.290229	10.6614
UP_SEQ_FEATURE	repeat:WD 4	14	3.01724	0.0080572	STRN4, WDR81, PWP2, RPTOR, MIOS, DCAF7, RAE1, WDR4, WDR3, PALB2, WDR44, NUP43, CSTF1, GEMIN5	461	251	19113	2.3125	0.999962	0.313828	12.3257
UP_SEQ_FEATURE	repeat:WD 3	14	3.01724	0.0122483	STRN4, WDR81, PWP2, RPTOR, MIOS, DCAF7, RAE1, WDR4, WDR3, PALB2, WDR44, NUP43, CSTF1, GEMIN5	461	265	19113	2.19033	1	0.383749	18.1587
INTERPRO	IPR001680:WD40 repeat	14	3.01724	0.0145976	STRN4, WDR81, PWP2, RPTOR, NUP214, MIOS, DCAF7, RAE1, WDR4, WDR3, WDR44, NUP43, CSTF1, GEMIN5	410	266	16659	2.13851	0.999958	0.367791	19.8415
UP_SEQ_FEATURE	repeat:WD 2	14	3.01724	0.0158582	STRN4, WDR81, PWP2, RPTOR, MIOS, DCAF7, RAE1, WDR4, WDR3, PALB2, WDR44, NUP43, CSTF1, GEMIN5	461	274	19113	2.11839	1	0.446219	22.8888
UP_SEQ_FEATURE	repeat:WD 1	14	3.01724	0.0158582	STRN4, WDR81, PWP2, RPTOR, MIOS, DCAF7, RAE1, WDR4, WDR3, PALB2, WDR44, NUP43, CSTF1, GEMIN5	461	274	19113	2.11839	1	0.446219	22.8888
SP_PIR_KEYWORDS	wd repeat	14	3.01724	0.0160576	STRN4, WDR81, PWP2, RPTOR, MIOS, DCAF7, RAE1, WDR4, WDR3, PALB2, WDR44, NUP43, CSTF1, GEMIN5	461	276	19235	2.11646	0.990243	0.117616	19.3251
INTERPRO	IPR019775:WD40 repeat, conserved site	14	3.01724	0.0197158	STRN4, WDR81, PWP2, RPTOR, MIOS, DCAF7, RAE1, WDR4, WDR3, PALB2, WDR44, NUP43, CSTF1, GEMIN5	410	277	16659	2.05359	0.999999	0.375647	25.88
SMART	SM00320:WD40	14	3.01724	0.0280073	STRN4, WDR81, PWP2, RPTOR, NUP214, MIOS, DCAF7, RAE1, WDR4, WDR3, WDR44, NUP43, CSTF1, GEMIN5	246	266	9079	1.94245	0.990248	0.320135	29.1141
INTERPRO	IPR017986:WD40 repeat, region	12	2.58621	0.033725	DCAF7, RAE1, STRN4, WDR4, WDR3, WDR44, WDR81, CSTF1, NUP43, RPTOR, PWP2, GEMIN5	410	238	16659	2.04866	1	0.499522	40.3078
INTERPRO	IPR019781:WD40 repeat, subgroup	12	2.58621	0.0371403	DCAF7, RAE1, STRN4, WDR4, WDR3, WDR44, WDR81, CSTF1, NUP43, RPTOR, PWP2, GEMIN5	410	242	16659	2.0148	1	0.513834	43.4034
INTERPRO	IPR019782:WD40 repeat 2	11	2.37069	0.0528585	DCAF7, RAE1, STRN4, WDR4, WDR3, WDR44, WDR81, CSTF1, NUP43, PWP2, GEMIN5	410	226	16659	1.97765	1	0.588115	55.8141
UP_SEQ_FEATURE	repeat:WD 6	9	1.93966	0.0934569	MIOS, STRN4, WDR3, WDR44, CSTF1, NUP43, RPTOR, PWP2, GEMIN5	461	192	19113	1.94343	1	0.845672	79.7169
UP_SEQ_FEATURE	repeat:WD 5	10	2.15517	0.110881	MIOS, STRN4, WDR3, WDR44, WDR81, CSTF1, NUP43, RPTOR, PWP2, GEMIN5	461	233	19113	1.77939	1	0.875155	85.2061
UP_SEQ_FEATURE	repeat:WD 7	6	1.2931	0.294253	STRN4, WDR3, WDR44, RPTOR, PWP2, GEMIN5	461	150	19113	1.65839	1	0.988024	99.654
Annotation Cluster 37	Enrichment Score: 1.472489980546609
Category	Term	Count	%	PValue	Genes	List Total	Pop Hits	Pop Total	Fold Enrichment	Bonferroni	Benjamini	FDR
GOTERM_BP_FAT	GO:0007049~cell cycle	32	6.89655	0.00565438	CCNT2, HAUS5, RABGAP1, NEK1, RPA1, MCM8, NIPBL, PSMC3IP, MTBP, CABLES2, USP16, CCAR1, TAF2, CCNK, CSRP2BP, UPF1, CEP135, DSN1, LIG1, LIG3, CDC23, CDK6, ILF3, MPHOSPH9, PPM1D, RIF1, PSMD12, MDM4, ANAPC7, NEK4, NUP43, MPHOSPH8	335	776	13528	1.66524	0.999655	0.162362	8.92424
SP_PIR_KEYWORDS	cell cycle	21	4.52586	0.00785385	CCNT2, CCNK, HAUS5, RABGAP1, DSN1, NEK1, LIG1, LIG3, CDC23, CDK6, MCM8, PPM1D, NIPBL, RIF1, MTBP, CABLES2, ANAPC7, USP16, NEK4, NUP43, CCAR1	461	461	19235	1.90068	0.895134	0.0724133	9.93129
SP_PIR_KEYWORDS	cell division	14	3.01724	0.0114516	CCNT2, CCNK, HAUS5, DSN1, NEK1, LIG1, LIG3, CDC23, CDK6, CABLES2, ANAPC7, USP16, NEK4, NUP43	461	264	19235	2.21266	0.962897	0.0923388	14.1689
GOTERM_BP_FAT	GO:0022403~cell cycle phase	19	4.09483	0.0145103	TAF2, CCNK, HAUS5, DSN1, NEK1, LIG3, CDC23, CDK6, ILF3, RPA1, MPHOSPH9, PPM1D, NIPBL, PSMC3IP, MTBP, ANAPC7, USP16, NEK4, NUP43	335	414	13528	1.85328	1	0.290018	21.4126
GOTERM_BP_FAT	GO:0051301~cell division	15	3.23276	0.0150407	CCNT2, CCNK, HAUS5, DSN1, NEK1, LIG1, LIG3, CDC23, CDK6, CABLES2, ANAPC7, USP16, NEK4, NUP43, ERCC2	335	295	13528	2.05333	1	0.294825	22.107
GOTERM_BP_FAT	GO:0022402~cell cycle process	23	4.9569	0.023643	TAF2, CCNK, CSRP2BP, HAUS5, CEP135, DSN1, NEK1, LIG3, CDC23, CDK6, ILF3, RPA1, MPHOSPH9, PPM1D, NIPBL, PSMD12, PSMC3IP, MTBP, MDM4, ANAPC7, USP16, NEK4, NUP43	335	565	13528	1.64387	1	0.399335	32.5945
GOTERM_BP_FAT	GO:0000279~M phase	15	3.23276	0.0341699	CCNK, HAUS5, DSN1, NEK1, LIG3, CDC23, ILF3, RPA1, MPHOSPH9, NIPBL, PSMC3IP, ANAPC7, USP16, NEK4, NUP43	335	329	13528	1.84113	1	0.488101	43.6253
GOTERM_BP_FAT	GO:0000278~mitotic cell cycle	16	3.44828	0.0416115	TAF2, CCNK, HAUS5, DSN1, NEK1, CDC23, CDK6, MPHOSPH9, PPM1D, NIPBL, PSMD12, MTBP, ANAPC7, USP16, NEK4, NUP43	335	370	13528	1.74625	1	0.526202	50.3742
GOTERM_BP_FAT	GO:0000087~M phase of mitotic cell cycle	11	2.37069	0.0515932	MPHOSPH9, CCNK, HAUS5, NIPBL, DSN1, NEK1, CDC23, ANAPC7, NEK4, USP16, NUP43	335	224	13528	1.98305	1	0.59678	58.241
GOTERM_BP_FAT	GO:0048285~organelle fission	11	2.37069	0.058205	PEX11B, CCNK, HAUS5, NIPBL, DSN1, NEK1, CDC23, ANAPC7, NEK4, USP16, NUP43	335	229	13528	1.93975	1	0.620588	62.7897
SP_PIR_KEYWORDS	mitosis	9	1.93966	0.073365	CCNK, HAUS5, DSN1, NEK1, CDC23, ANAPC7, NEK4, USP16, NUP43	461	183	19235	2.05203	1	0.353278	63.6065
GOTERM_BP_FAT	GO:0000280~nuclear division	10	2.15517	0.0955791	CCNK, HAUS5, NIPBL, DSN1, NEK1, CDC23, ANAPC7, NEK4, USP16, NUP43	335	220	13528	1.83555	1	0.739516	80.9122
GOTERM_BP_FAT	GO:0007067~mitosis	10	2.15517	0.0955791	CCNK, HAUS5, NIPBL, DSN1, NEK1, CDC23, ANAPC7, NEK4, USP16, NUP43	335	220	13528	1.83555	1	0.739516	80.9122
GOTERM_BP_FAT	GO:0007059~chromosome segregation	4	0.862069	0.323248	NIPBL, DSN1, CDC23, NUP43	335	81	13528	1.99418	1	0.966248	99.8398
Annotation Cluster 38	Enrichment Score: 1.4667225082532331
Category	Term	Count	%	PValue	Genes	List Total	Pop Hits	Pop Total	Fold Enrichment	Bonferroni	Benjamini	FDR
SP_PIR_KEYWORDS	exonuclease	5	1.07759	0.0191033	PAN2, REXO1, EXD2, LOC81691, XRN2	461	43	19235	4.85169	0.99598	0.128823	22.5756
UP_SEQ_FEATURE	domain:Exonuclease	3	0.646552	0.0228869	PAN2, REXO1, LOC81691	461	10	19113	12.438	1	0.516922	31.3717
INTERPRO	IPR006055:Exonuclease	3	0.646552	0.0392244	PAN2, REXO1, LOC81691	410	13	16659	9.37655	1	0.514398	45.2181
GOTERM_MF_FAT	GO:0004527~exonuclease activity	5	1.07759	0.0440888	PAN2, REXO1, EXD2, LOC81691, XRN2	328	53	12983	3.73418	1	0.367923	47.4433
INTERPRO	IPR013520:Exonuclease, RNase T and DNA polymerase III	3	0.646552	0.0450333	PAN2, REXO1, LOC81691	410	14	16659	8.70679	1	0.537439	49.9935
SMART	SM00479:EXOIII	3	0.646552	0.0465107	PAN2, REXO1, LOC81691	246	13	9079	8.51689	0.999575	0.40402	43.8372
Annotation Cluster 39	Enrichment Score: 1.3598515288634079
Category	Term	Count	%	PValue	Genes	List Total	Pop Hits	Pop Total	Fold Enrichment	Bonferroni	Benjamini	FDR
INTERPRO	IPR001841:Zinc finger, RING-type	16	3.44828	0.00662238	RNF19A, NFXL1, RNF213, TTC3, MYCBP2, TRIM37, MSL2, PHF14, RNF219, RNFT2, TRIM45, RC3H2, RNF24, MDM4, UNK, MLL2	410	296	16659	2.19631	0.989518	0.295749	9.50999
SMART	SM00184:RING	16	3.44828	0.0141005	RNF19A, NFXL1, RNF213, TTC3, MYCBP2, TRIM37, MSL2, PHF14, RNF219, RNFT2, TRIM45, RC3H2, RNF24, MDM4, UNK, MLL2	246	296	9079	1.99495	0.901208	0.226781	15.8035
INTERPRO	IPR017907:Zinc finger, RING-type, conserved site	14	3.01724	0.0212735	RNF19A, NFXL1, RNF213, TTC3, MYCBP2, TRIM37, MSL2, RNF219, RNFT2, TRIM45, RC3H2, RNF24, MDM4, UNK	410	280	16659	2.03159	1	0.388415	27.6317
UP_SEQ_FEATURE	zinc finger region:RING-type	8	1.72414	0.243807	MSL2, TRIM45, RNFT2, RNF24, MDM4, RNF213, TTC3, MLL2	461	210	19113	1.57942	1	0.978937	98.9369
INTERPRO	IPR018957:Zinc finger, C3HC4 RING-type	8	1.72414	0.327801	RNF19A, RNF219, TRIM45, RNFT2, RNF24, RC3H2, RNF213, TTC3	410	228	16659	1.42567	1	0.988517	99.7456
Annotation Cluster 40	Enrichment Score: 1.3277560980129417
Category	Term	Count	%	PValue	Genes	List Total	Pop Hits	Pop Total	Fold Enrichment	Bonferroni	Benjamini	FDR
GOTERM_MF_FAT	GO:0004221~ubiquitin thiolesterase activity	9	1.93966	0.000578203	PAN2, USPL1, USP39, USP21, BAP1, USP46, USP36, USP16, USP42	328	75	12983	4.74988	0.237138	0.0206061	0.821735
INTERPRO	IPR001394:Peptidase C19, ubiquitin carboxyl-terminal hydrolase 2	8	1.72414	0.000711087	PAN2, USPL1, USP39, USP21, USP46, USP36, USP16, USP42	410	61	16659	5.32875	0.386134	0.0781105	1.06414
INTERPRO	IPR018200:Peptidase C19, ubiquitin carboxyl-terminal hydrolase 2, conserved site	7	1.50862	0.00317309	USPL1, USP39, USP21, USP46, USP36, USP16, USP42	410	59	16659	4.82071	0.886981	0.215136	4.66742
GOTERM_MF_FAT	GO:0016790~thiolester hydrolase activity	9	1.93966	0.00419071	PAN2, USPL1, USP39, USP21, BAP1, USP46, USP36, USP16, USP42	328	102	12983	3.49256	0.859896	0.0702053	5.81527
GOTERM_BP_FAT	GO:0006511~ubiquitin-dependent protein catabolic process	14	3.01724	0.00719971	PAN2, USPL1, BAP1, CDC23, PSMD12, UBR5, USP39, USP21, USP46, USP36, ANAPC7, USP16, FBXO21, USP42	335	242	13528	2.33615	0.999961	0.187252	11.2297
SP_PIR_KEYWORDS	thiol protease	7	1.50862	0.0821439	CAPN10, USP21, BAP1, USP46, USP36, USP16, USP42	461	126	19235	2.31803	1	0.370315	67.9238
GOTERM_MF_FAT	GO:0004843~ubiquitin-specific protease activity	3	0.646552	0.113221	USP21, USP46, USP16	328	23	12983	5.16291	1	0.647033	81.9901
GOTERM_MF_FAT	GO:0019783~small conjugating protein-specific protease activity	3	0.646552	0.121545	USP21, USP46, USP16	328	24	12983	4.94779	1	0.654929	84.2573
GOTERM_MF_FAT	GO:0008234~cysteine-type peptidase activity	7	1.50862	0.145642	CAPN10, USP21, BAP1, USP46, USP36, USP16, USP42	328	141	12983	1.96508	1	0.713084	89.4137
GOTERM_MF_FAT	GO:0070011~peptidase activity, acting on L-amino acid peptides	10	2.15517	0.938882	TAF2, CAPN10, USP21, BAP1, USP46, OSGEPL1, USP36, USP16, USP42, PWP2	328	549	12983	0.720989	1	0.999994	100
SP_PIR_KEYWORDS	Protease	8	1.72414	0.946374	CAPN10, USP21, BAP1, USP46, OSGEPL1, USP36, USP16, USP42	461	484	19235	0.689661	1	0.999748	100
GOTERM_MF_FAT	GO:0008233~peptidase activity	10	2.15517	0.95606	TAF2, CAPN10, USP21, BAP1, USP46, OSGEPL1, USP36, USP16, USP42, PWP2	328	574	12983	0.689587	1	0.999998	100
GOTERM_MF_FAT	GO:0004175~endopeptidase activity	4	0.862069	0.996321	CAPN10, OSGEPL1, USP16, PWP2	328	375	12983	0.422211	1	1	100
*Huang da W, Sherman BT, Lempicki RA: Systematic and integrative analysis of large gene lists using DAVID bioinformatics resources. Nat Protoc 2009, 4:44-57.
&Enrichment Score ≥ 1.3 is equivalent to p ≤ 0.05

## Sheet: Tabel S4D-CC+SC-FDR0.2-2nd
Table S4D (related to Figure 3): Functional annotation of the 2nd group of genes of the heatmap of Figure 3D by DAVID
Annotation Cluster 1	Enrichment Score: 2.0788934305333577
Category	Term	Count	%	PValue	Genes	List Total	Pop Hits	Pop Total	Fold Enrichment	Bonferroni	Benjamini	FDR
SP_PIR_KEYWORDS	endoplasmic reticulum	16	11.2676	0.000238794	PGAP2, TUSC3, LEPREL2, STIM1, ALDH3A2, SELS, AGTRAP, ELOVL1, SEC61B, STX18, AGPAT9, SPCS3, HSD11B1, CREB3L1, TRAPPC1, FKBP2	142	713	19235	3.03973	0.0568325	0.0568325	0.308789
GOTERM_CC_FAT	GO:0005783~endoplasmic reticulum	18	12.6761	0.00275826	PGAP2, TUSC3, MAMDC2, LEPREL2, STIM1, ALDH3A2, SELS, AGTRAP, ELOVL1, SEC61B, STX18, AGPAT9, SPCS3, HSD11B1, CREB3L1, TRAPPC1, FKBP2, CIB1	109	960	12782	2.19874	0.426029	0.426029	3.40546
GOTERM_CC_FAT	GO:0005789~endoplasmic reticulum membrane	8	5.6338	0.00776163	PGAP2, SEC61B, TUSC3, AGPAT9, HSD11B1, SPCS3, STIM1, SELS	109	269	12782	3.48747	0.791157	0.406702	9.31183
GOTERM_CC_FAT	GO:0042175~nuclear envelope-endoplasmic reticulum network	8	5.6338	0.0102878	PGAP2, SEC61B, TUSC3, AGPAT9, HSD11B1, SPCS3, STIM1, SELS	109	284	12782	3.30327	0.874891	0.405266	12.166
GOTERM_CC_FAT	GO:0012505~endomembrane system	14	9.85915	0.0144759	PGAP2, SLC2A9, TUSC3, STIM1, CHPF2, SELS, CHST1, ANXA7, AP2A2, PICALM, SEC61B, AGPAT9, SPCS3, HSD11B1	109	782	12782	2.09939	0.946652	0.443554	16.7162
GOTERM_CC_FAT	GO:0044432~endoplasmic reticulum part	8	5.6338	0.0276405	PGAP2, SEC61B, TUSC3, AGPAT9, HSD11B1, SPCS3, STIM1, SELS	109	347	12782	2.70354	0.996426	0.552847	29.6446
GOTERM_CC_FAT	GO:0031090~organelle membrane	14	9.85915	0.133235	PGAP2, TUSC3, C17ORF61, NLRX1, STIM1, CHPF2, SELS, ALDH3A2, CHST1, AP2A2, SEC61B, AGPAT9, SPCS3, HSD11B1	109	1096	12782	1.49792	1	0.890388	83.365
Annotation Cluster 2	Enrichment Score: 1.960959177299381
Category	Term	Count	%	PValue	Genes	List Total	Pop Hits	Pop Total	Fold Enrichment	Bonferroni	Benjamini	FDR
GOTERM_BP_FAT	GO:0030198~extracellular matrix organization	7	4.92958	0.000155303	IBSP, ILK, CCDC80, BCL3, VWA1, B4GALT7, COL8A2	106	104	13528	8.58999	0.137314	0.137314	0.243524
GOTERM_BP_FAT	GO:0043062~extracellular structure organization	8	5.6338	0.000274306	IBSP, TNC, ILK, CCDC80, BCL3, VWA1, B4GALT7, COL8A2	106	163	13528	6.26369	0.229643	0.1223	0.429753
GOTERM_CC_FAT	GO:0005614~interstitial matrix	3	2.11268	0.00304533	MAMDC2, CCDC80, VWA1	109	10	12782	35.1798	0.458302	0.263998	3.75369
GOTERM_CC_FAT	GO:0005604~basement membrane	4	2.8169	0.0282534	TNC, CCDC80, VWA1, COL8A2	109	78	12782	6.01364	0.996851	0.51329	30.1988
SP_PIR_KEYWORDS	extracellular matrix	6	4.22535	0.0325073	MAMDC2, TNC, NPNT, CCDC80, VWA1, COL8A2	142	241	19235	3.37239	0.999695	0.932718	34.8158
GOTERM_CC_FAT	GO:0044420~extracellular matrix part	4	2.8169	0.0765777	TNC, CCDC80, VWA1, COL8A2	109	117	12782	4.0091	1	0.831238	63.1892
GOTERM_CC_FAT	GO:0005578~proteinaceous extracellular matrix	6	4.22535	0.134352	MAMDC2, TNC, NPNT, CCDC80, VWA1, COL8A2	109	320	12782	2.19874	1	0.873991	83.632
GOTERM_CC_FAT	GO:0031012~extracellular matrix	6	4.22535	0.167448	MAMDC2, TNC, NPNT, CCDC80, VWA1, COL8A2	109	345	12782	2.03941	1	0.899961	89.9625
Annotation Cluster 3	Enrichment Score: 1.6971969373369036
Category	Term	Count	%	PValue	Genes	List Total	Pop Hits	Pop Total	Fold Enrichment	Bonferroni	Benjamini	FDR
GOTERM_MF_FAT	GO:0019838~growth factor binding	7	4.92958	0.000174152	A2M, FLT1, WISP1, SEC61B, IL1RL1, IGFBP6, IGFBP3	103	105	12983	8.40324	0.0509087	0.0509087	0.23247
INTERPRO	IPR017891:Insulin-like growth factor binding protein, N-terminal	3	2.11268	0.00378931	WISP1, IGFBP6, IGFBP3	131	12	16659	31.792	0.706615	0.706615	5.00101
SMART	SM00121:IB	3	2.11268	0.00780536	WISP1, IGFBP6, IGFBP3	62	20	9079	21.9653	0.465743	0.269071	7.993
UP_SEQ_FEATURE	domain:IGFBP N-terminal	3	2.11268	0.0094114	WISP1, IGFBP6, IGFBP3	142	20	19113	20.1898	0.994166	0.994166	12.8713
INTERPRO	IPR000867:Insulin-like growth factor-binding protein, IGFBP	3	2.11268	0.010473	WISP1, IGFBP6, IGFBP3	131	20	16659	19.0752	0.966647	0.678107	13.2615
GOTERM_MF_FAT	GO:0005520~insulin-like growth factor binding	3	2.11268	0.0163016	WISP1, IGFBP6, IGFBP3	103	25	12983	15.1258	0.992779	0.708495	19.7188
GOTERM_BP_FAT	GO:0001558~regulation of cell growth	6	4.22535	0.0175519	WISP1, TSG101, IGFBP6, ILK, IGFBP3, ENO1	106	194	13528	3.94709	1	0.985154	24.2693
GOTERM_BP_FAT	GO:0040008~regulation of growth	6	4.22535	0.125967	WISP1, TSG101, IGFBP6, ILK, IGFBP3, ENO1	106	341	13528	2.24556	1	0.992734	87.9198
GOTERM_BP_FAT	GO:0008285~negative regulation of cell proliferation	6	4.22535	0.149335	CGREF1, TSG101, IGFBP6, ILK, IGFBP3, B4GALT7	106	361	13528	2.12115	1	0.995028	92.1056
GOTERM_BP_FAT	GO:0007050~cell cycle arrest	3	2.11268	0.190438	CGREF1, TSG101, ILK	106	103	13528	3.71716	1	0.995617	96.372
GOTERM_BP_FAT	GO:0042127~regulation of cell proliferation	8	5.6338	0.411624	NAMPT, CGREF1, FLT1, TSG101, IGFBP6, ILK, IGFBP3, B4GALT7	106	787	13528	1.29731	1	0.999002	99.9758
Annotation Cluster 4	Enrichment Score: 1.6591452041489494
Category	Term	Count	%	PValue	Genes	List Total	Pop Hits	Pop Total	Fold Enrichment	Bonferroni	Benjamini	FDR
GOTERM_BP_FAT	GO:0005976~polysaccharide metabolic process	6	4.22535	0.00171077	GBE1, NANS, PPP1R2, MAMDC2, B4GALT7, CHST1	106	111	13528	6.89852	0.803744	0.418869	2.65215
GOTERM_BP_FAT	GO:0030203~glycosaminoglycan metabolic process	3	2.11268	0.0679492	MAMDC2, B4GALT7, CHST1	106	55	13528	6.96123	1	0.988453	66.8681
GOTERM_BP_FAT	GO:0006022~aminoglycan metabolic process	3	2.11268	0.0906125	MAMDC2, B4GALT7, CHST1	106	65	13528	5.89028	1	0.995075	77.4877
Annotation Cluster 5	Enrichment Score: 1.5948382960062255
Category	Term	Count	%	PValue	Genes	List Total	Pop Hits	Pop Total	Fold Enrichment	Bonferroni	Benjamini	FDR
GOTERM_BP_FAT	GO:0005976~polysaccharide metabolic process	6	4.22535	0.00171077	GBE1, NANS, PPP1R2, MAMDC2, B4GALT7, CHST1	106	111	13528	6.89852	0.803744	0.418869	2.65215
GOTERM_BP_FAT	GO:0000271~polysaccharide biosynthetic process	3	2.11268	0.0475953	GBE1, NANS, B4GALT7	106	45	13528	8.50818	1	0.990319	53.4918
GOTERM_BP_FAT	GO:0016051~carbohydrate biosynthetic process	3	2.11268	0.201711	GBE1, NANS, B4GALT7	106	107	13528	3.5782	1	0.99644	97.0889
Annotation Cluster 6	Enrichment Score: 1.5894812420602076
Category	Term	Count	%	PValue	Genes	List Total	Pop Hits	Pop Total	Fold Enrichment	Bonferroni	Benjamini	FDR
UP_SEQ_FEATURE	domain:PID	3	2.11268	0.0180183	PID1, CCM2, TBC1D1	142	28	19113	14.4213	0.999949	0.992886	23.2749
SMART	SM00462:PTB	3	2.11268	0.0267344	PID1, CCM2, TBC1D1	62	38	9079	11.5607	0.885578	0.514521	25.0303
INTERPRO	IPR006020:Phosphotyrosine interaction region	3	2.11268	0.0353811	PID1, CCM2, TBC1D1	131	38	16659	10.0396	0.999991	0.945458	38.54
Annotation Cluster 7	Enrichment Score: 1.4819771083523443
Category	Term	Count	%	PValue	Genes	List Total	Pop Hits	Pop Total	Fold Enrichment	Bonferroni	Benjamini	FDR
GOTERM_BP_FAT	GO:0007155~cell adhesion	12	8.4507	0.0197886	IBSP, NRP2, MAEA, WISP1, HSPB11, TNC, NPNT, ILK, ZYX, COL8A2, MUC16, CIB1	106	700	13528	2.18782	1	0.977663	26.931
GOTERM_BP_FAT	GO:0022610~biological adhesion	12	8.4507	0.0199758	IBSP, NRP2, MAEA, WISP1, HSPB11, TNC, NPNT, ILK, ZYX, COL8A2, MUC16, CIB1	106	701	13528	2.1847	1	0.959165	27.1498
SP_PIR_KEYWORDS	cell adhesion	7	4.92958	0.0906043	IBSP, CGREF1, WISP1, TNC, NPNT, ZYX, COL8A2	142	422	19235	2.24693	1	0.833025	70.7676

## Sheet: Table S4E-Heatmap_genes-histone
Table S4E (related to Figure 3): Annotation of histone and other chromatin modification genes shown in Figure 3D by published papers* and other annotation tools
CC+SC-FDR0.2-1st-group
	Genes	Gene name	Histone protein residues Modified	GO Terms
Histone methyltransferases	SETD1A	SET domain containing 1A	H3K4	GO:0042054~histone methyltransferase activity
	SETDB1	SET domain, bifurcated 1	H3K9	GO:0042054~histone methyltransferase activity
	EHMT1	euchromatic histone-lysine N-methyltransferase 1	H3K9	GO:0042054~histone methyltransferase activity
	EHMT2	euchromatic histone-lysine N-methyltransferase 2	H3K9	GO:0042054~histone methyltransferase activity
	MLL2	myeloid/lymphoid or mixed-lineage leukemia 2	H3K4	GO:0042054~histone methyltransferase activity
	MLL4	myeloid/lymphoid or mixed-lineage leukemia 4	H3K4	GO:0042054~histone methyltransferase activity
	SUZ12	suppressor of zeste 12 homolog (Drosophila)	H3K9 and H3K27	GO:0042054~histone methyltransferase activity
	SMYD5	SMYD family member 5	H4K20
Histone demethylases	JMJD1C	jumonji domain containing 1C	H3K9
	PHF2	PHD finger protein 2	H3K9
Histone methylation readers	CHD6	chromodomain helicase DNA binding protein 6		SM00298:CHROMO
	MSL3
Histone acetyltransferases	CREBBP	CREB binding protein		GO:0004402~histone acetyltransferase activity
	CSRP2BP	CSRP2 binding protein	H3 and H4
	KAT2A	K(lysine) acetyltransferase 2A		GO:0004402~histone acetyltransferase activity
	ING3	inhibitor of growth family, member 3	H4 and H2A	GO:0004402~histone acetyltransferase activity
	MSL1	male-specific lethal 1 homolog (Drosophila)	H4K16
	MSL2	male-specific lethal 2 homolog (Drosophila)	H4K16
	NCOA3	nuclear receptor coactivator 3		GO:0004402~histone acetyltransferase activity
Histone deacetylases	SIRT1	sirtuin (silent mating type information regulation 2 homolog) 1 (S. cerevisiae)	H3K9	GO:0004407~histone deacetylase activity
Histone acetylation readers	BRD3	bromodomain containing 3
	BRD4	bromodomain containing 4
Histone ubiquitination	HUWE1	HECT, UBA and WWE domain containing 1	H1, H2A, H2B, H3 and H4	GO:0016574~histone ubiquitination
	UBR5	ubiquitin protein ligase E3 component n-recognin 5
Histone deubiquitination	ATXN7L3	ataxin 7-like 3	H2A and H2B	GO:0016578~histone deubiquitination
	UIMC1	ubiquitin interaction motif containing 1	H2A and H2AX	GO:0016578~histone deubiquitination
	BAP1	BRCA1 associated protein-1 (ubiquitin carboxy-terminal hydrolase)	H2A and HCFC
	USP16	ubiquitin specific peptidase 16	H2A	GO:0016578~histone deubiquitination
	USP21	ubiquitin specific peptidase 21	H2A	GO:0016578~histone deubiquitination
	USP36	ubiquitin specific peptidase 36	H2B
Other chromatin modification genes	ASF1A	ASF1 anti-silencing function 1 homolog A (S. cerevisiae)		GO:0016568~chromatin modification
	ARID1B	AT rich interactive domain 1B (SWI1-like)		GO:0016568~chromatin modification
	BCORL1	BCL6 co-repressor-like 1		GO:0016568~chromatin modification
	DNMT3B	DNA (cytosine-5-)-methyltransferase 3 beta	H3 at H3K4 and H3K9	GO:0016568~chromatin modification
	SUPT6H	suppressor of Ty 6 homolog (S. cerevisiae)		GO:0016568~chromatin modification
*References
Cao, J., and Yan, Q. (2012). Histone ubiquitination and deubiquitination in transcription, DNA damage response, and cancer. Frontiers in oncology 2, 26.
Dawson, M. A., and Kouzarides, T. (2012). Cancer epigenetics: from mechanism to therapy. Cell 150, 12-27.
Fraga, M. F., Ballestar, E., Villar-Garea, A., Boix-Chornet, M., Espada, J., Schotta, G., Bonaldi, T., Haydon, C., Ropero, S., Petrie, K., et al. (2005). Loss of acetylation at Lys16 and trimethylation at Lys20 of histone H4 is a common hallmark of human cancer. Nature genetics 37, 391-400.
Margueron, R., and Reinberg, D. (2011). The Polycomb complex PRC2 and its mark in life. Nature 469, 343-349.
Schuettengruber, B., Martinez, A. M., Iovino, N., and Cavalli, G. (2011). Trithorax group proteins: switching genes on and keeping them active. Nature reviews Molecular cell biology 12, 799-814.
Wilson, B. G., and Roberts, C. W. (2011). SWI/SNF nucleosome remodellers and cancer. Nature reviews Cancer 11, 481-492.
Ceol, C. J., Houvras, Y., Jane-Valbuena, J., Bilodeau, S., Orlando, D. A., Battisti, V., Fritsch, L., Lin, W. M., Hollmann, T. J., Ferre, F., et al. (2011). The histone methyltransferase SETDB1 is recurrently amplified in melanoma and accelerates its onset. Nature 471, 513-+.
Stender, J. D., Pascual, G., Liu, W., Kaikkonen, M. U., Do, K., Spann, N. J., Boutros, M., Perrimon, N., Rosenfeld, M. G., and Glass, C. K. (2012). Control of proinflammatory gene programs by regulated trimethylation and demethylation of histone H4K20. Molecular cell 48, 28-38.
Gudjonsson, T., Altmeyer, M., Savic, V., Toledo, L., Dinant, C., Grofte, M., Bartkova, J., Poulsen, M., Oka, Y., Bekker-Jensen, S., et al. (2012). TRIP12 and UBR5 Suppress Spreading of Chromatin Ubiquitylation at Damaged Chromosomes. Cell 150, 697-709.

## Sheet: Table S4F-CC+SC-FDR0.1
Table S4F (related to Figure 3): Differentially expressed genes between complex and simple carcinomas at FDR ≤ 0.1
Gene	T401130	T402421	T403802	T518		T115	T159	T341400	T401188	T406434	T5	T76		t-value	p-value	q-value
A2M	93.3565	43.3152	86.4793	39.716		9.44162	8.73389	7.58734	14.1127	3.08127	14.7697	6.49233		6.65407	0.000234009	0.000349675
ADNP	87.4119	73.4115	70.563	77.3891		141.939	126.441	194.591	143.229	143.713	147.833	140.479		-9.46942	9.32517e-06	2.85449e-05
ADNP2	29.3079	27.3695	23.5378	25.6947		40.387	46.2259	53.551	47.2099	43.7075	42.4988	35.7942		-7.59179	5.72725e-05	0.00011418
ALDH3A2	100.605	90.5461	113.073	102.842		65.2379	61.4195	40.4081	67.9982	58.1397	66.1353	66.192		6.35289	0.000134621	0.000221223
ANP32E	46.4339	45.5476	43.0584	52.0419		74.0924	65.8764	89.6352	64.8496	96.8176	60.3243	109.048		-5.47426	0.000565535	0.000635124
ATP13A1	28.7438	33.1196	33.6309	32.9172		57.2117	50.1405	52.0443	42.7555	59.7977	54.4143	37.6099		-6.14311	0.000191311	0.000292585
BCORL1	5.67644	5.7928	4.47534	5.94937		10.8056	8.72452	13.4815	7.85771	10.038	10.8352	9.01513		-6.44938	0.000187315	0.000271177
BST1	41.2775	24.2731	25.5798	31.6542		10.6144	10.2207	12.6796	7.42952	19.8975	7.37698	10.6415		5.86766	0.000327436	0.000428174
C17orf75	11.7133	11.32	9.71971	12.126		16.5196	17.6327	23.1399	13.1876	18.0233	17.9627	15.3288		-5.27792	0.00051353	0.000585171
C20orf11	33.2525	39.6282	36.4477	32.5736		61.026	46.4458	53.2476	44.8879	51.4594	43.1731	62.7006		-5.22024	0.0005832	0.000642261
C20orf112	13.9305	13.9814	10.4171	11.1979		28.8629	21.0846	42.537	35.1893	41.2811	30.1049	34.4429		-8.26634	1.98237e-05	4.99536e-05
C20orf4	29.1784	22.4947	21.9066	23.052		47.3701	35.7121	49.6373	34.6105	46.424	44.3624	47.859		-6.84901	0.000243145	0.000356812
C3orf75	8.43296	7.24079	7.91803	7.51739		17.0233	16.8581	11.4803	10.6821	19.785	14.2896	10.1829		-5.62552	0.000703253	0.000735032
CCDC127	10.4188	11.439	9.38802	11.5448		16.6775	19.672	17.2883	17.1048	30.5549	25.2603	31.286		-6.20146	0.000247274	0.000363948
CERS2	72.0763	77.8195	66.3281	67.5345		140.024	98.4103	91.439	85.8738	114.009	111.663	117.785		-5.6933	0.00033491	0.00043531
CHD6	10.8919	11.4172	8.54703	11.0021		24.5957	23.4126	23.3667	21.0342	17.5758	28.1341	14.1367		-6.53454	0.000109176	0.000185542
CHERP	24.1454	21.5743	24.0806	24.783		35.1177	34.2384	33.509	34.9759	36.951	33.2091	25.3677		-6.07776	0.000186905	0.000264041
CHST1	17.365	13.9586	28.8577	18.8099		3.75905	5.45186	5.68933	3.83617	8.95387	11.2465	3.74499		5.43268	0.000515642	0.000592307
CIB1	90.7318	92.1466	119.283	99.2851		53.855	60.9217	62.4648	54.6622	55.16	50.7778	68.2243		7.4068	0.00052656	0.000599443
CNOT8	26.8627	34.5856	28.3521	28.479		38.5998	50.2391	59.386	59.751	80.277	45.5121	44.8906		-5.43441	0.000442701	0.000499536
COL20A1	0.051477	0.127102	0.0536015	0.0600507		1e-06	1e-06	0.0359581	1e-06	1e-06	1e-06	1e-06		6.35916	0.000608342	0.000677942
CREBBP	25.4746	22.8316	24.3219	24.0465		36.7824	33.2971	42.8434	36.888	36.0195	36.8274	27.6147		-6.97027	0.000116603	0.000199814
CUEDC1	30.8995	29.4247	25.8282	33.6226		60.7726	46.3847	38.9586	47.817	43.466	58.777	74.4691		-5.44921	0.000414969	0.0004924
DBF4B	1.10731	1.02578	1.28808	1.76978		3.78076	3.01372	5.24159	2.00442	2.39711	4.08588	3.21176		-5.44545	0.000586078	0.000649397
DDX39B	169.72	134.582	165.853	144.954		278.317	257.061	333.497	233.114	290.682	200.12	204.726		-5.5844	0.000351921	0.000456719
DNAJC28	10.4273	8.97692	8.33612	8.10734		13.0428	18.0413	15.3891	11.694	17.3669	11.9865	12.1135		-5.06538	0.000715595	0.000742168
DNMT3B	1.3665	1.29975	1.38358	1.14469		4.25329	2.80182	7.45869	2.09863	4.01356	3.06418	3.57364		-6.57352	0.000323487	0.000421038
DROSHA	13.044	13.7144	13.8871	15.8226		21.3575	25.6712	23.6261	20.7323	29.1795	22.9833	29.8426		-8.1601	1.94126e-05	4.28174e-05
EIF5	165.99	165.837	152.423	157.91		237.461	215.554	219.947	245.98	256.462	250.176	244.991		-12.2133	8.3026e-07	7.13623e-06
FAM48A	18.2527	17.2408	13.6782	15.4193		23.5001	30.8926	35.9132	23.1796	25.6491	21.0508	25.9373		-5.19915	0.000702738	0.000727895
FASTKD3	12.7819	15.2411	14.8663	12.1041		29.2205	26.3917	26.5891	29.0623	36.9486	26.6837	37.8531		-9.68766	9.13509e-06	2.14087e-05
FLT1	15.4509	18.7214	21.8705	21.5933		9.47689	8.55501	10.7108	12.3089	11.8499	11.6378	8.31011		6.1708	0.000676315	0.000713623
HCCS	21.6878	19.3487	16.2709	17.3266		36.9916	27.0813	29.5971	25.0661	38.8839	28.3022	31.0356		-5.72149	0.00048975	0.000556626
HEATR1	17.5739	13.3654	15.8296	13.0713		22.3822	23.2683	34.8562	27.3896	34.2476	23.0503	22.7575		-5.62645	0.00044505	0.000506672
IBSP	5.61723	0.261899	21.0208	5.58932		1e-06	1e-06	1e-06	1e-06	1e-06	0.317951	1e-06		6.5332	0.000145305	0.000242632
IGFBP3	39.8785	29.7228	42.868	43.5214		17.8908	25.0049	11.9568	10.9876	21.0418	14.2803	10.3857		5.98363	0.000206934	0.000328267
IL18BP	53.9651	133.062	104.02	65.3729		9.29486	15.5924	35.0036	29.5297	23.3676	8.67605	14.4711		5.41965	0.000642405	0.000692214
IL22RA2	5.70919	28.4092	10.7114	17.3534		0.294929	1.47545	0.310267	1.51659	1.58603	1.19873	0.801014		6.20632	0.000491322	0.000570898
ILF3	68.8356	63.3584	65.9259	75.1678		88.9402	87.9445	103.235	95.2905	121.407	81.1069	104.237		-5.56808	0.000348611	0.000449582
KIAA0947	11.8623	11.9508	9.17311	12.3212		16.761	18.3499	23.1953	21.3306	21.4745	16.9331	32.1597		-5.67593	0.000320434	0.000413901
KIAA1804	2.89413	2.34285	3.46587	3.43921		8.60359	9.07011	5.5589	7.12162	5.98826	7.03859	11.2841		-7.08585	9.8566e-05	0.000164133
LRRC42	47.9734	42.2598	38.5547	36.7841		23.4765	23.5649	22.0824	30.5227	22.1842	20.355	17.6645		7.00661	9.04976e-05	0.000149861
MACROD2	1.61574	1.36192	2.3155	1.31521		6.60742	4.12387	4.89936	3.96134	8.40563	7.92094	2.37187		-5.36188	0.000463708	0.000542354
MAP2K2	86.8655	88.5237	97.9887	93.6892		131.12	116.423	121.407	132.54	153.759	118.738	107.32		-6.03246	0.000203986	0.00032113
MEGF8	7.44137	8.23015	7.73285	10.6069		17.0128	12.1778	18.7726	14.5239	13.4498	20.7178	12.664		-5.39223	0.000697339	0.000720759
MFSD4	28.0958	33.8221	42.2014	39.58		9.16705	19.3447	6.86818	6.71664	12.6129	11.0749	4.72238		6.81295	0.000107771	0.000178406
MLL2	7.00191	8.36439	7.08853	9.12918		14.7883	13.6402	13.3794	23.5707	11.2573	18.9174	15.793		-6.0304	0.000195151	0.000306858
MLLT1	34.2886	35.7318	37.0467	36.5431		40.2072	46.4578	52.9571	49.761	49.6925	42.888	40.7261		-5.55811	0.000590565	0.000663669
MSL1	35.6631	31.7587	34.0133	32.4211		46.0819	40.2682	54.5054	43.5839	51.3931	47.337	49.2679		-7.48481	3.79138e-05	7.84985e-05
NCOA6	40.1684	37.6701	31.6346	33.9797		50.0396	53.8894	66.6818	57.9999	47.1992	53.4285	56.3373		-6.32245	0.000494371	0.000578035
NOL11	22.651	18.0781	18.7036	18.9822		33.2359	30.2538	38.2876	33.3765	41.6738	29.646	45.6714		-7.51605	4.03927e-05	9.2771e-05
NUP188	19.4672	18.3488	16.9183	21.1471		30.1285	22.7228	31.2036	29.7095	32.6632	29.6915	36.5833		-6.45575	0.000139081	0.000228359
OTUD7A	1.01347	1.04011	1.4146	0.928505		0.149199	0.309541	0.201675	0.197111	0.155998	0.54183	0.29512		7.71785	4.02295e-05	8.56348e-05
PCNP	68.9578	64.6833	64.0148	64.6915		52.126	50.1777	52.2614	60.6184	48.7994	47.2293	58.1119		5.75454	0.000371171	0.000463855
PGM2	60.9243	66.1637	54.3882	64.7267		31.8442	36.5093	32.7063	51.5792	30.5766	34.8609	30.5701		6.85162	7.83259e-05	0.000142725
PHF20L1	14.6927	14.8949	10.019	19.8817		30.8381	32.091	37.9007	40.5984	81.3504	33.8241	46.3378		-5.51828	0.00074027	0.000749304
PLA2R1	13.3548	13.9098	16.3217	22.0823		2.61072	2.94042	4.0123	5.08329	4.28221	4.71439	1.36933		7.62173	3.33053e-05	7.13623e-05
POLR3F	11.2208	9.28177	9.81034	9.45587		15.2064	14.6597	21.9379	15.3957	19.2949	15.6871	15.4004		-7.22354	5.0286e-05	9.99072e-05
PPIL1	46.4784	35.4458	41.7444	42.4175		65.696	79.6074	53.1973	57.5425	71.7316	57.3663	77.7992		-5.55458	0.000463041	0.000535217
PRPF8	116.797	115.051	131.022	119.395		151.35	133.373	156.197	172.616	167.784	151.564	164.373		-5.96106	0.000263628	0.000385357
PSMF1	79.9794	82.3407	84.8338	66.2958		98.3805	120.703	142.265	104.962	124.279	106.756	148.011		-5.27267	0.000671574	0.000706487
PTCD3	15.4346	13.3414	14.8189	16.4818		29.0022	17.2519	28.4045	32.1165	37.3052	21.9721	30.8771		-5.62017	0.00049014	0.000563762
PWP2	17.8814	17.3962	17.7651	20.6856		24.6591	37.2048	30.2545	31.7967	30.5324	27.0214	31.3681		-7.85336	2.83119e-05	6.42261e-05
RABGAP1	23.3377	19.1664	15.93	20.7418		38.923	30.2681	41.7094	36.2684	47.0575	41.0892	25.1173		-5.45711	0.000590622	0.000670806
RAE1	35.0268	29.9414	27.7076	35.7536		58.0316	42.8059	67.8623	41.1085	59.7842	50.974	56.0848		-5.49982	0.000461301	0.000528081
RGS2	107.164	138.365	101.543	82.035		37.6886	20.6473	71.781	44.8073	32.8243	26.6663	15.7779		5.45481	0.000458096	0.000520945
RNF11	112.148	121.576	137.736	140.016		80.5975	71.9951	63.938	111.697	84.4641	75.9615	70.7167		5.60109	0.000345217	0.000442446
SCAF4	20.1346	21.0959	16.715	18.4255		30.1098	41.5784	27.4156	26.0699	28.3575	28.2485	29.0731		-5.78778	0.000317033	0.000399629
SCAI	1.20553	1.32091	1.24633	1.66458		2.83257	2.8434	2.52928	2.12746	3.74493	2.28937	2.78137		-6.89875	0.000147232	0.000249768
SCRIB	38.6194	33.281	33.5437	42.9898		72.019	77.3285	71.7516	61.8854	92.9696	69.9099	168.922		-5.7404	0.000391455	0.000470991
SEMA3C	204.077	193.641	154.074	107.113		7.14194	44.0491	28.4285	51.1292	12.4623	10.3491	37.134		6.05361	0.000262683	0.00037822
SETDB1	29.2261	24.5008	25.7995	27.4092		45.4868	31.7807	41.9588	40.0653	32.044	38.4683	39.054		-5.64876	0.000318823	0.000406765
SLC12A4	29.9967	41.7768	42.7145	34.26		12.6844	14.7343	23.893	17.3631	14.1523	20.032	9.04301		5.96756	0.000210785	0.000335403
SLC25A37	23.2042	21.5083	17.5776	23.73		72.9818	26.1904	88.4699	49.6785	59.5976	68.6896	46.8769		-5.78137	0.000404594	0.000485264
SLC45A1	3.72066	7.14786	4.72535	2.09399		0.649272	0.926121	0.361215	0.269954	0.282509	0.771215	0.139719		6.33539	0.000223959	0.000342539
SMG8	16.4059	12.5957	12.1269	13.7738		22.0272	19.2586	23.9169	18.971	31.8367	25.548	25.3438		-5.69247	0.000445441	0.000513809
SMYD5	16.6167	13.7208	16.9253	14.1401		28.5694	23.3742	27.2522	19.3444	31.5276	26.6538	29.904		-6.57512	0.000121166	0.000206951
SNRNP200	83.0717	78.3812	75.2579	80.1148		126.348	103.279	89.6364	112.579	99.3511	118.68	108.691		-6.42377	0.000184211	0.000256904
SNX11	21.1723	17.7628	16.8964	19.4616		26.5773	32.4795	38.0986	25.9454	32.2799	25.3788	27.3487		-5.92226	0.000262387	0.000371084
SPCS3	116.383	152.187	106.334	104.017		45.4093	60.0843	55.2981	76.6472	53.8473	51.6415	64.2477		6.6827	0.000488308	0.00054949
STK35	7.68923	7.30983	6.4608	9.27113		14.1693	11.2575	20.5004	13.5285	16.562	14.9363	16.5608		-6.63312	0.000192719	0.000299722
STRBP	21.0266	24.6701	24.3484	21.0229		48.3377	37.4303	28.1867	38.0679	51.2647	40.9474	54.9138		-6.28945	0.000190855	0.000285449
STRN4	39.29	35.1046	36.6819	35.8108		65.8096	52.2946	56.2197	53.1576	50.8566	55.4224	50.2726		-9.39124	6.02036e-06	1.42725e-05
TMEM101	42.6584	35.4457	34.0791	37.6486		88.1587	58.9737	66.7872	47.108	71.1481	68.8391	91.3659		-6.17896	0.000188178	0.000278313
TOR2A	39.9549	34.2141	32.63	31.3386		56.3093	60.6982	56.2952	45.7123	71.2229	52.2026	51.4928		-6.45618	0.000200073	0.000313994
TRAF4	65.4421	52.0158	69.3285	51.2422		142.981	66.7398	156.358	101.26	112.971	126.276	151.712		-5.09268	0.00065269	0.000699351
TRIM37	13.2007	13.3216	11.5478	15.3839		21.8232	16.8543	17.9391	22.4377	21.9049	21.1018	26.1052		-5.66207	0.000551815	0.000620852
TTC3	29.6717	32.212	27.8552	44.998		58.3367	61.2805	92.2359	60.5244	111.675	77.8809	85.169		-5.86964	0.00054556	0.000613716
USP36	13.5206	13.8232	11.8895	14.0675		24.3316	24.2867	19.5553	24.7573	31.2706	31.2801	32.0244		-8.66011	1.56084e-05	3.56812e-05
VPS13B	12.1403	14.8998	12.3391	15.5953		23.1688	27.1159	24.589	21.3609	44.2042	31.935	26.5774		-6.29693	0.000141587	0.000235496
VWA1	220.516	311.857	282.955	327.557		47.7543	62.5318	100.046	161.167	159.612	59.4923	54.0241		5.81021	0.000392656	0.000478128
WDR4	12.5795	10.7197	14.8152	11.6667		22.2825	28.0808	19.5822	20.7266	31.6162	21.8656	30.7016		-6.76417	0.000113479	0.000192678
WDR81	12.1443	11.118	11.2157	11.8313		14.1595	14.8174	16.7661	16.9583	13.3663	16.9343	14.9965		-6.77771	9.18478e-05	0.000156997
YTHDF1	110.983	96.1798	87.7202	93.7095		161.936	128.255	212.056	156.217	206.839	156.554	160.637		-6.58052	0.000103014	0.000171269
YY1	56.5897	49.5211	52.2258	49.6069		70.107	84.0075	64.7901	68.2133	75.6902	77.7299	69.7231		-7.31914	6.61661e-05	0.000121316
ZBTB26	11.8195	10.8913	9.31256	10.1311		22.4523	16.5718	22.5644	19.5998	23.6057	22.4251	13.7104		-6.9055	7.1386e-05	0.000128452
ZFP64	24.7534	22.9668	18.7863	27.2734		47.8507	34.7213	56.3342	36.5788	58.734	46.9477	45.2463		-6.25284	0.000288693	0.000392493
ZFR	38.1228	35.7157	32.7217	35.0777		54.5384	42.4928	38.7595	50.4226	55.993	54.4381	58.404		-5.29768	0.000587947	0.000656533
ZNF131	16.1804	13.0163	11.932	13.0617		23.7765	26.4292	36.6484	20.1769	29.3311	24.3009	30.8094		-7.03872	7.57252e-05	0.000135588
ZNF16	6.03595	5.26586	5.79828	5.50621		13.9212	16.2565	16.2419	10.9917	30.0954	17.2515	15.4175		-8.94544	5.45291e-05	0.000107044
ZNF304	2.54481	2.0608	2.22415	2.19594		6.28468	4.00446	6.67366	4.22274	6.59929	4.22875	4.65647		-8.40097	2.31591e-05	5.70899e-05
ZNF407	9.75476	8.47804	9.04244	8.33708		11.7927	11.2623	12.4281	12.1608	12.0901	12.7894	10.0113		-5.94373	0.000530716	0.00060658
ZNF470	2.71091	2.23893	2.90131	3.82072		7.06792	4.96849	7.58449	7.25791	8.34103	8.41501	7.904		-7.16963	0.000630132	0.000685078
ZNF496	24.2311	19.0379	19.841	21.8988		36.1401	24.7339	39.9716	28.9023	36.9242	37.5797	30.3897		-5.26071	0.000556614	0.000627988
ZNF687	28.4483	25.0715	27.3071	23.2149		40.3079	51.9274	38.9197	40.6085	43.6876	34.1922	36.2969		-6.53381	0.000134174	0.000214087

## Sheet: Tabel S4G-CC+SC-FDR0.1-CC-down
Table S4G (related to Figure 3): DAVID Functional Annotation of down-regulated genes in complex carcinomas at FDR ≤ 0.1 from Table S4F
Annotation Cluster 1	Enrichment Score: 3.500813184357122					List Total	Pop Hits	Pop Total	Fold Enrichment	Bonferroni	Benjamini	FDR
Category	Term	Count	%	PValue	Genes	41	1450	12782	3.65507	0.000295131	0.000295131	0.00335813
GOTERM_CC_FAT	GO:0031981~nuclear lumen	17	22.3684	3.04303e-06	SETDB1, POLR3F, YY1, CREBBP, ADNP, ZNF687, HEATR1, ILF3, ZFR, PWP2, PRPF8, NCOA6, WDR4, NOL11, USP36, DNMT3B, MLL2	41	698	12782	4.91306	0.0040709	0.00203752	0.0463982
GOTERM_CC_FAT	GO:0005730~nucleolus	11	14.4737	4.20528e-05	SETDB1, NCOA6, ADNP, NOL11, ZNF687, USP36, ILF3, HEATR1, ZFR, DNMT3B, PWP2	41	1779	12782	2.97912	0.00411128	0.00137231	0.0468593
GOTERM_CC_FAT	GO:0070013~intracellular organelle lumen	17	22.3684	4.24708e-05	SETDB1, POLR3F, YY1, CREBBP, ADNP, ZNF687, HEATR1, ILF3, ZFR, PWP2, PRPF8, NCOA6, WDR4, NOL11, USP36, DNMT3B, MLL2	41	1820	12782	2.91201	0.00545716	0.00136709	0.0622366
GOTERM_CC_FAT	GO:0043233~organelle lumen	17	22.3684	5.64119e-05	SETDB1, POLR3F, YY1, CREBBP, ADNP, ZNF687, HEATR1, ILF3, ZFR, PWP2, PRPF8, NCOA6, WDR4, NOL11, USP36, DNMT3B, MLL2	41	1856	12782	2.85552	0.00694813	0.0013935	0.079293
GOTERM_CC_FAT	GO:0031974~membrane-enclosed lumen	17	22.3684	7.18776e-05	SETDB1, POLR3F, YY1, CREBBP, ADNP, ZNF687, HEATR1, ILF3, ZFR, PWP2, PRPF8, NCOA6, WDR4, NOL11, USP36, DNMT3B, MLL2	41	2596	12782	1.92146	0.585767	0.136609	9.54052
GOTERM_CC_FAT	GO:0043232~intracellular non-membrane-bounded organelle	16	21.0526	0.00904469	SETDB1, RABGAP1, CREBBP, ADNP, ZNF687, HEATR1, ILF3, ZFR, PWP2, RAE1, NCOA6, NOL11, USP36, STRBP, CHD6, DNMT3B	41	2596	12782	1.92146	0.585767	0.136609	9.54052
GOTERM_CC_FAT	GO:0043228~non-membrane-bounded organelle	16	21.0526	0.00904469	SETDB1, RABGAP1, CREBBP, ADNP, ZNF687, HEATR1, ILF3, ZFR, PWP2, RAE1, NCOA6, NOL11, USP36, STRBP, CHD6, DNMT3B	41	882	12782	2.47425	0.995708	0.494073	46.2135
GOTERM_CC_FAT	GO:0005654~nucleoplasm	7	9.21053	0.0546451	POLR3F, YY1, PRPF8, NCOA6, CREBBP, WDR4, MLL2
Annotation Cluster 2	Enrichment Score: 2.956625612809477					List Total	Pop Hits	Pop Total	Fold Enrichment	Bonferroni	Benjamini	FDR
Category	Term	Count	%	PValue	Genes	76	4283	19235	2.36369	2.00365e-06	2.00365e-06	1.94327e-05
SP_PIR_KEYWORDS	nucleus	40	52.6316	1.69801e-08	DBF4B, ZFP64, CNOT8, STK35, ZNF131, NUP188, ZNF16, C20ORF11, ZNF304, RAE1, PRPF8, ZNF407, MLLT1, USP36, CHD6, DNMT3B, ZNF496, ZNF470, TRAF4, MLL2, SETDB1, POLR3F, YY1, ANP32E, CREBBP, ADNP, SCAI, HEATR1, ILF3, ZNF687, ZBTB26, ZFR, PWP2, ADNP2, BCORL1, MSL1, SNRNP200, NCOA6, WDR4, NOL11	76	1718	19235	3.09368	0.000728978	0.000364555	0.00707241
SP_PIR_KEYWORDS	zinc-finger	21	27.6316	6.18001e-06	DBF4B, ZFP64, YY1, CREBBP, ZNF131, ADNP, ZNF687, ZBTB26, ZNF16, TTC3, TRIM37, ZNF304, ADNP2, SMYD5, ZNF407, PHF20L1, DNMT3B, ZNF496, ZNF470, TRAF4, MLL2	76	2071	19235	2.81078	0.000964668	0.000321659	0.00936003
SP_PIR_KEYWORDS	Transcription	23	30.2632	8.17906e-06	SETDB1, POLR3F, CNOT8, ZFP64, YY1, CREBBP, ZNF131, SCAI, ADNP, ZNF687, ILF3, ZBTB26, ZNF16, ZNF304, ADNP2, BCORL1, NCOA6, ZNF407, MLLT1, CHD6, ZNF496, ZNF470, MLL2	56	2101	13528	2.64452	0.00450766	0.00450766	0.0144628
GOTERM_BP_FAT	GO:0006350~transcription	23	30.2632	1.02213e-05	SETDB1, POLR3F, CNOT8, ZFP64, YY1, CREBBP, ZNF131, SCAI, ADNP, ZNF687, ILF3, ZBTB26, ZNF16, ZNF304, ADNP2, BCORL1, NCOA6, ZNF407, MLLT1, CHD6, ZNF496, ZNF470, MLL2	76	2026	19235	2.74829	0.00240949	0.000482364	0.0233943
SP_PIR_KEYWORDS	transcription regulation	22	28.9474	2.04439e-05	SETDB1, CNOT8, ZFP64, YY1, CREBBP, ZNF131, SCAI, ADNP, ZNF687, ILF3, ZBTB26, ZNF16, ZNF304, ADNP2, BCORL1, NCOA6, ZNF407, MLLT1, CHD6, ZNF496, ZNF470, MLL2	55	2331	12983	2.43042	0.00315156	0.00315156	0.0258402
GOTERM_MF_FAT	GO:0003677~DNA binding	24	31.5789	2.1769e-05	SETDB1, POLR3F, CNOT8, ZFP64, YY1, CREBBP, ZNF131, ADNP, ZNF687, ILF3, ZBTB26, ZFR, ZNF16, ZNF304, ADNP2, ZNF407, MLLT1, STRBP, CHD6, DNMT3B, ZNF496, ZNF470, TRAF4, MLL2	76	622	19113	4.85184	0.0107964	0.0107964	0.0404484
UP_SEQ_FEATURE	zinc finger region:C2H2-type 3	12	15.7895	2.93377e-05	ZNF304, ADNP2, ZFP64, YY1, ZNF131, ZNF407, ADNP, ZNF687, ZBTB26, ZNF16, ZNF496, ZNF470	66	784	16659	4.18535	0.00724362	0.00724362	0.0532003
INTERPRO	IPR007087:Zinc finger, C2H2-type	13	17.1053	4.37941e-05	ZFP64, YY1, ZNF131, ADNP, ZNF687, ZBTB26, ZNF16, ZFR, ZNF304, ADNP2, ZNF407, ZNF496, ZNF470	66	797	16659	4.11709	0.00849027	0.00425418	0.0623925
INTERPRO	IPR015880:Zinc finger, C2H2-like	13	17.1053	5.13632e-05	ZFP64, YY1, ZNF131, ADNP, ZNF687, ZBTB26, ZNF16, ZFR, ZNF304, ADNP2, ZNF407, ZNF496, ZNF470	55	2311	12983	2.34931	0.00934249	0.00468221	0.0768198
GOTERM_MF_FAT	GO:0008270~zinc ion binding	23	30.2632	6.47317e-05	SETDB1, DBF4B, ZFP64, YY1, CREBBP, ZNF131, ADNP, ZNF687, ZBTB26, ZFR, ZNF16, TTC3, TRIM37, ZNF304, ADNP2, SMYD5, ZNF407, PHF20L1, DNMT3B, ZNF496, ZNF470, TRAF4, MLL2	76	575	19113	4.81105	0.0292559	0.0147365	0.110601
UP_SEQ_FEATURE	zinc finger region:C2H2-type 4	11	14.4737	8.02465e-05	ZNF304, ADNP2, ZFP64, YY1, ZNF407, ADNP, ZNF687, ZBTB26, ZNF16, ZNF496, ZNF470	56	2601	13528	2.22903	0.041138	0.020785	0.134398
GOTERM_BP_FAT	GO:0045449~regulation of transcription	24	31.5789	9.50364e-05	SETDB1, POLR3F, CNOT8, ZFP64, YY1, CREBBP, ZNF131, ADNP, SCAI, ZNF687, ILF3, ZBTB26, ZNF16, ZNF304, ADNP2, BCORL1, NCOA6, ZNF407, MLLT1, CHD6, DNMT3B, ZNF496, ZNF470, MLL2	55	2785	12983	2.11898	0.018383	0.00616559	0.151792
GOTERM_MF_FAT	GO:0046914~transition metal ion binding	25	32.8947	0.000127951	HCCS, ZFP64, DBF4B, ZNF131, ZNF16, TTC3, ZNF304, ZNF407, PHF20L1, ZNF470, ZNF496, DNMT3B, TRAF4, MLL2, SETDB1, YY1, CREBBP, ADNP, ZNF687, ZBTB26, ZFR, TRIM37, ADNP2, SMYD5, SLC25A37	76	2189	19235	2.42802	0.0232557	0.00391405	0.227952
SP_PIR_KEYWORDS	zinc	21	27.6316	0.00019939	DBF4B, ZFP64, YY1, CREBBP, ZNF131, ADNP, ZNF687, ZBTB26, ZNF16, TTC3, TRIM37, ZNF304, ADNP2, SMYD5, ZNF407, PHF20L1, DNMT3B, ZNF496, ZNF470, TRAF4, MLL2	48	797	9079	3.08519	0.035439	0.0178794	0.571114
SMART	SM00355:ZnF_C2H2	13	17.1053	0.000563626	ZFP64, YY1, ZNF131, ADNP, ZNF687, ZBTB26, ZNF16, ZFR, ZNF304, ADNP2, ZNF407, ZNF496, ZNF470	76	608	19113	4.1363	0.201597	0.0547307	0.835582
UP_SEQ_FEATURE	zinc finger region:C2H2-type 2	10	13.1579	0.000608306	ZNF304, ADNP2, ZFP64, YY1, ZNF131, ZNF407, ZNF687, ZBTB26, ZNF496, ZNF470	76	542	19113	4.17598	0.373871	0.0750662	1.72982
UP_SEQ_FEATURE	zinc finger region:C2H2-type 1	9	11.8421	0.0012646	ZNF304, ADNP2, ZFP64, YY1, ZNF131, ZNF407, ADNP, ZBTB26, ZNF470	76	2972	19235	1.95865	0.179262	0.0243915	1.89774
SP_PIR_KEYWORDS	metal-binding	23	30.2632	0.00167277	HCCS, DBF4B, ZFP64, YY1, CREBBP, ZNF131, ADNP, ZNF687, ZBTB26, ZNF16, TTC3, TRIM37, ZNF304, ADNP2, ATP13A1, SMYD5, ZNF407, PHF20L1, DNMT3B, ZNF496, ZNF470, TRAF4, MLL2	76	1868	19235	2.3033	0.207876	0.0255606	2.23479
SP_PIR_KEYWORDS	dna-binding	17	22.3684	0.00197294	ZFP64, YY1, ZNF131, ADNP, ZNF687, ILF3, ZBTB26, ZFR, ZNF16, ZNF304, ADNP2, ZNF407, STRBP, CHD6, DNMT3B, ZNF496, ZNF470	56	1773	13528	2.18	0.817012	0.345958	5.29203
GOTERM_BP_FAT	GO:0006355~regulation of transcription, DNA-dependent	16	21.0526	0.00383501	POLR3F, CNOT8, YY1, CREBBP, ZNF131, ADNP, ILF3, ZNF304, ADNP2, NCOA6, MLLT1, CHD6, DNMT3B, ZNF496, ZNF470, MLL2	56	1813	13528	2.1319	0.877934	0.295687	6.51168
GOTERM_BP_FAT	GO:0051252~regulation of RNA metabolic process	16	21.0526	0.00474706	POLR3F, CNOT8, YY1, CREBBP, ZNF131, ADNP, ILF3, ZNF304, ADNP2, NCOA6, MLLT1, CHD6, DNMT3B, ZNF496, ZNF470, MLL2	76	538	19113	3.73958	0.850775	0.211629	6.84429
UP_SEQ_FEATURE	zinc finger region:C2H2-type 5	8	10.5263	0.00512815	ZNF304, ZFP64, ZNF131, ZNF407, ZNF687, ZNF16, ZNF496, ZNF470	76	103	19113	9.76648	0.943804	0.273763	10.174
UP_SEQ_FEATURE	zinc finger region:C2H2-type 16	4	5.26316	0.00775064	ZNF304, ZNF407, ZNF16, ZNF470	76	201	19113	6.25589	0.95009	0.258999	10.5702
UP_SEQ_FEATURE	zinc finger region:C2H2-type 13	5	6.57895	0.0080687	ZNF304, ZFP64, ZNF407, ZNF16, ZNF470	76	451	19113	3.90334	0.958098	0.250539	11.1512
UP_SEQ_FEATURE	zinc finger region:C2H2-type 7	7	9.21053	0.00853743	ZNF304, ZFP64, ZNF407, ADNP, ZNF687, ZNF16, ZNF470	55	4140	12983	1.53949	0.734895	0.282446	10.2998
GOTERM_MF_FAT	GO:0046872~metal ion binding	27	35.5263	0.00911428	HCCS, MEGF8, ZFP64, DBF4B, ZNF131, ZNF16, TTC3, ZNF304, ZNF407, PHF20L1, ZNF470, ZNF496, DNMT3B, TRAF4, MLL2, SETDB1, YY1, CREBBP, ADNP, ZNF687, ZBTB26, ZFR, TRIM37, ADNP2, ATP13A1, SMYD5, SLC25A37	76	334	19113	4.51773	0.976366	0.268082	13.0273
UP_SEQ_FEATURE	zinc finger region:C2H2-type 10	6	7.89474	0.0100707	ZNF304, ZFP64, ZNF407, ZNF687, ZNF16, ZNF470	66	621	16659	3.25165	0.822573	0.350985	11.889
INTERPRO	IPR013087:Zinc finger, C2H2-type/integrase, DNA-binding	8	10.5263	0.0103628	ZNF304, ZFP64, YY1, ZNF407, ZBTB26, ZNF16, ZNF496, ZNF470	55	4179	12983	1.52512	0.780224	0.261423	11.6664
GOTERM_MF_FAT	GO:0043169~cation binding	27	35.5263	0.0103949	HCCS, MEGF8, ZFP64, DBF4B, ZNF131, ZNF16, TTC3, ZNF304, ZNF407, PHF20L1, ZNF470, ZNF496, DNMT3B, TRAF4, MLL2, SETDB1, YY1, CREBBP, ADNP, ZNF687, ZBTB26, ZFR, TRIM37, ADNP2, ATP13A1, SMYD5, SLC25A37	76	488	19113	3.60739	0.989617	0.296264	15.6531
UP_SEQ_FEATURE	zinc finger region:C2H2-type 6	7	9.21053	0.0122689	ZNF304, ZFP64, ZNF131, ZNF407, ZNF687, ZNF16, ZNF470	55	4241	12983	1.50282	0.844237	0.266482	14.1215
GOTERM_MF_FAT	GO:0043167~ion binding	27	35.5263	0.0127417	HCCS, MEGF8, ZFP64, DBF4B, ZNF131, ZNF16, TTC3, ZNF304, ZNF407, PHF20L1, ZNF470, ZNF496, DNMT3B, TRAF4, MLL2, SETDB1, YY1, CREBBP, ADNP, ZNF687, ZBTB26, ZFR, TRIM37, ADNP2, ATP13A1, SMYD5, SLC25A37	76	134	19113	7.50707	0.997204	0.342932	19.6782
UP_SEQ_FEATURE	zinc finger region:C2H2-type 15	4	5.26316	0.0157651	ZNF304, ZNF407, ZNF16, ZNF470	76	376	19113	4.01309	0.997543	0.313083	20.0637
UP_SEQ_FEATURE	zinc finger region:C2H2-type 9	6	7.89474	0.0161085	ZNF304, ZFP64, ZNF407, ZNF687, ZNF16, ZNF470	76	252	19113	4.98982	0.998422	0.301229	21.373
UP_SEQ_FEATURE	zinc finger region:C2H2-type 12	5	6.57895	0.0172861	ZNF304, ZFP64, ZNF407, ZNF16, ZNF470	76	417	19113	3.61852	0.999874	0.335087	28.4385
UP_SEQ_FEATURE	zinc finger region:C2H2-type 8	6	7.89474	0.0239734	ZNF304, ZFP64, ZNF407, ZNF687, ZNF16, ZNF470	76	293	19113	4.29158	0.999974	0.344589	32.5412
UP_SEQ_FEATURE	zinc finger region:C2H2-type 11	5	6.57895	0.0281432	ZNF304, ZFP64, ZNF407, ZNF16, ZNF470	76	83	19113	9.08989	1	0.458229	44.7839
UP_SEQ_FEATURE	zinc finger region:C2H2-type 17	3	3.94737	0.0421551	ZNF407, ZNF16, ZNF470	55	1512	12983	1.87345	0.998596	0.60874	41.5967
GOTERM_MF_FAT	GO:0030528~transcription regulator activity	12	15.7895	0.0442905	ADNP2, CNOT8, YY1, ZNF131, NCOA6, CREBBP, SCAI, ADNP, MLLT1, ILF3, ZNF496, DNMT3B	76	157	19113	4.80548	1	0.800777	84.4944
UP_SEQ_FEATURE	zinc finger region:C2H2-type 14	3	3.94737	0.126433	ZNF304, ZNF16, ZNF470	55	975	12983	1.69475	1	0.920825	94.5357
GOTERM_MF_FAT	GO:0003700~transcription factor activity	7	9.21053	0.217189	ADNP2, CNOT8, YY1, ZNF131, CREBBP, ADNP, ZNF496
Annotation Cluster 3	Enrichment Score: 2.4878786037963114					List Total	Pop Hits	Pop Total	Fold Enrichment	Bonferroni	Benjamini	FDR
Category	Term	Count	%	PValue	Genes	66	5	16659	151.445	0.0243962	0.00819909	0.180625
INTERPRO	IPR006561:DZF	3	3.94737	0.000148776	ILF3, STRBP, ZFR	76	5	19113	150.892	0.0542641	0.0184254	0.207718
UP_SEQ_FEATURE	domain:DZF	3	3.94737	0.000150778	ILF3, STRBP, ZFR	48	5	9079	113.487	0.0164872	0.0164872	0.263543
SMART	SM00572:DZF	3	3.94737	0.000259726	ILF3, STRBP, ZFR	55	718	12983	1.9726	1	0.886351	90.1192
GOTERM_MF_FAT	GO:0003723~RNA binding	6	7.89474	0.177139	CHERP, RAE1, PRPF8, ILF3, STRBP, ZFR	76	540	19235	1.87476	1	0.90266	99.3061
SP_PIR_KEYWORDS	rna-binding	4	5.26316	0.352296	PRPF8, ILF3, STRBP, ZFR
Annotation Cluster 4	Enrichment Score: 1.7274771979355685					List Total	Pop Hits	Pop Total	Fold Enrichment	Bonferroni	Benjamini	FDR
Category	Term	Count	%	PValue	Genes	66	49	16659	15.4536	0.927308	0.279414	17.4602
INTERPRO	IPR001214:SET	3	3.94737	0.0156683	SETDB1, SMYD5, MLL2	76	49	19113	15.3972	0.997304	0.325916	19.7872
UP_SEQ_FEATURE	domain:SET	3	3.94737	0.015862	SETDB1, SMYD5, MLL2	48	49	9079	11.5804	0.819971	0.435348	23.8277
SMART	SM00317:SET	3	3.94737	0.0264355	SETDB1, SMYD5, MLL2
Annotation Cluster 5	Enrichment Score: 1.601870298600206					List Total	Pop Hits	Pop Total	Fold Enrichment	Bonferroni	Benjamini	FDR
Category	Term	Count	%	PValue	Genes	66	226	16659	5.58427	0.858524	0.323705	13.3373
INTERPRO	IPR019782:WD40 repeat 2	5	6.57895	0.0117118	RAE1, STRN4, WDR4, WDR81, PWP2	66	238	16659	5.30271	0.902643	0.321742	15.676
INTERPRO	IPR017986:WD40 repeat, region	5	6.57895	0.0139343	RAE1, STRN4, WDR4, WDR81, PWP2	66	242	16659	5.21506	0.914864	0.296671	16.4999
INTERPRO	IPR019781:WD40 repeat, subgroup	5	6.57895	0.0147308	RAE1, STRN4, WDR4, WDR81, PWP2	76	251	19113	5.0097	0.998283	0.312393	21.1245
UP_SEQ_FEATURE	repeat:WD 4	5	6.57895	0.0170612	RAE1, STRN4, WDR4, WDR81, PWP2	66	266	16659	4.74453	0.965725	0.312583	21.8796
INTERPRO	IPR001680:WD40 repeat	5	6.57895	0.0201162	RAE1, STRN4, WDR4, WDR81, PWP2	76	265	19113	4.74503	0.999509	0.330321	24.7178
UP_SEQ_FEATURE	repeat:WD 3	5	6.57895	0.0203792	RAE1, STRN4, WDR4, WDR81, PWP2	76	274	19113	4.58918	0.999796	0.332834	27.1491
UP_SEQ_FEATURE	repeat:WD 2	5	6.57895	0.0227085	RAE1, STRN4, WDR4, WDR81, PWP2	76	274	19113	4.58918	0.999796	0.332834	27.1491
UP_SEQ_FEATURE	repeat:WD 1	5	6.57895	0.0227085	RAE1, STRN4, WDR4, WDR81, PWP2	76	276	19235	4.585	0.934044	0.218985	23.1783
SP_PIR_KEYWORDS	wd repeat	5	6.57895	0.022777	RAE1, STRN4, WDR4, WDR81, PWP2	66	277	16659	4.55612	0.97878	0.31974	24.5738
INTERPRO	IPR019775:WD40 repeat, conserved site	5	6.57895	0.0229424	RAE1, STRN4, WDR4, WDR81, PWP2	66	300	16659	4.20682	0.993184	0.364601	30.5906
INTERPRO	IPR015943:WD40/YVTN repeat-like	5	6.57895	0.0296043	RAE1, STRN4, WDR4, WDR81, PWP2	48	266	9079	3.55537	0.95723	0.545238	39.3663
SMART	SM00320:WD40	5	6.57895	0.0480557	RAE1, STRN4, WDR4, WDR81, PWP2	76	233	19113	3.23803	1	0.943833	97.3975
UP_SEQ_FEATURE	repeat:WD 5	3	3.94737	0.232484	STRN4, WDR81, PWP2
Annotation Cluster 6	Enrichment Score: 1.453142204179038					List Total	Pop Hits	Pop Total	Fold Enrichment	Bonferroni	Benjamini	FDR
Category	Term	Count	%	PValue	Genes	56	274	13528	6.17153	0.305434	0.1144	1.16006
GOTERM_BP_FAT	GO:0016568~chromatin modification	7	9.21053	0.00082425	SETDB1, BCORL1, MSL1, CREBBP, CHD6, DNMT3B, MLL2	56	378	13528	4.47354	0.842895	0.309382	5.75333
GOTERM_BP_FAT	GO:0006325~chromatin organization	7	9.21053	0.00417867	SETDB1, BCORL1, MSL1, CREBBP, CHD6, DNMT3B, MLL2	76	213	19235	5.94113	0.680817	0.10792	10.4844
SP_PIR_KEYWORDS	chromatin regulator	5	6.57895	0.0096312	SETDB1, BCORL1, MSL1, CHD6, MLL2	56	485	13528	3.4866	0.997549	0.576315	17.5067
GOTERM_BP_FAT	GO:0051276~chromosome organization	7	9.21053	0.0135083	SETDB1, BCORL1, MSL1, CREBBP, CHD6, DNMT3B, MLL2	76	103	19235	7.37161	0.999422	0.41292	51.4784
SP_PIR_KEYWORDS	s-adenosyl-l-methionine	3	3.94737	0.0612341	SETDB1, DNMT3B, MLL2	76	146	19235	5.20052	0.999999	0.537875	74.0133
SP_PIR_KEYWORDS	methyltransferase	3	3.94737	0.111082	SETDB1, DNMT3B, MLL2	41	460	12782	2.71092	1	0.785308	87.7603
GOTERM_CC_FAT	GO:0005694~chromosome	4	5.26316	0.173319	SETDB1, CREBBP, CHD6, DNMT3B	41	386	12782	2.42297	1	0.932897	99.0051
GOTERM_CC_FAT	GO:0044427~chromosomal part	3	3.94737	0.341481	CREBBP, CHD6, DNMT3B	76	1394	19235	1.27091	1	0.927161	99.9186
SP_PIR_KEYWORDS	transferase	7	9.21053	0.462904	SETDB1, MAP2K2, KIAA1804, CREBBP, STK35, DNMT3B, MLL2

## Sheet: Table S4H-CC+SC-FDR0.2+N-p0.05
Table S4H (related to Figure 3): a subset of differentially expressed genes between complex and simple carcinomas at FDR ≤ 0.2 that also differ from normal mammary glands in their expression level at p ≤ 0.05; used to draw Figure S3
	Normal Glands			Complex Carinomas					Simple Carcinomas
Gene	N31005	N32510		T401130	T402421	T403802	T518		T115	T159	T341400	T401188	T406434	T5	T76		t-value1	p-value1	t-value2	p-value2
A2M	28.6002	21.9676		93.3565	43.3152	86.4793	39.716		9.44162	8.73389	7.58734	14.1127	3.08127	14.7697	6.49233		3.41964	0.0267997	-4.63341	0.00390576
AGTRAP	57.829	69.0271		94.312	136.541	112.484	61.1504		22.7735	56.6668	20.9667	71.2396	28.0362	25.7986	50.9024		2.22326	0.0908453	-2.78955	0.0272923
AHSA1	79.5742	78.521		96.5887	81.1536	89.8868	74.4182		125.381	141.676	117.279	95.9861	217.959	116.138	102.528		1.28022	0.288365	4.57411	0.00371516
ALDH3A2	97.2755	120.086		100.605	90.5461	113.073	102.842		65.2379	61.4195	40.4081	67.9982	58.1397	66.1353	66.192		-0.55155	0.656579	-4.67407	0.0436986
ALKBH4	50.0843	45.0336		44.6765	45.4303	40.3801	44.1018		51.5889	79.1027	62.2176	55.5829	76.2168	54.4071	49.6493		-1.44079	0.321423	2.70777	0.0421757
ANAPC7	28.1811	26.5541		27.9888	26.7543	23.2904	28.4086		33.3223	35.4326	37.7826	38.3475	45.3581	30.9877	31.2397		-0.56527	0.602491	4.56397	0.00333047
ANP32E	57.0252	56.1697		46.4339	45.5476	43.0584	52.0419		74.0924	65.8764	89.6352	64.8496	96.8176	60.3243	109.048		-4.7703	0.0150029	3.76921	0.00904099
AP1AR	17.5063	19.9859		15.7512	11.6496	11.6331	12.7891		18.1797	16.1063	20.6192	21.5665	16.2077	14.9652	18.7731		-3.8552	0.0271772	-0.51353	0.65083
AP2A2	87.7072	77.8332		73.7805	70.8242	63.8071	75.1003		51.1303	50.5781	54.4555	69.7657	41.5085	53.4	63.743		-2.21873	0.170441	-4.81784	0.0100413
ARAF	49.6113	56.3582		57.3371	61.2082	56.0183	56.5202		100.753	81.1991	80.66	60.346	99.2549	82.2793	64.2696		1.31527	0.385028	4.24358	0.011868
ARHGAP39	15.6959	12.8898		15.6653	11.7933	18.1611	15.972		30.7866	18.2652	18.88	21.7139	38.9272	25.5891	28.2466		0.50226	0.652721	4.00441	0.0188209
ASF1A	24.9946	23.7607		17.4119	19.6339	18.7897	16.349		32.0199	24.04	32.767	24.8726	47.7415	23.2307	23.1317		-6.33367	0.00323385	1.57001	0.162866
ASXL1	98.9259	84.5303		57.3585	56.9547	39.8431	48.6502		79.9273	76.1769	152.721	85.2286	84.3278	79.8355	85.9325		-5.16346	0.01149	-0.18314	0.863214
ATAD2	28.0459	26.0113		13.951	9.51751	6.63233	27.5798		64.4631	42.5323	32.7614	22.2183	132.399	59.9013	193.296		-2.51353	0.0842172	2.79689	0.0302402
ATF6B	86.4103	90.7824		98.2889	81.3694	75.3947	75.0463		137.227	125.846	120.98	103.753	109.901	106.277	137.07		-1.13405	0.32442	5.9241	0.000766155
ATP13A1	33.0343	34.1675		28.7438	33.1196	33.6309	32.9172		57.2117	50.1405	52.0443	42.7555	59.7977	54.4143	37.6099		-1.17998	0.305148	6.13369	0.000566456
ATP2B1	24.0838	20.0263		51.4283	91.588	54.838	70.5332		15.9319	31.0673	26.7184	46.7403	39.9962	26.2414	35.0279		6.78263	0.00277734	1.96686	0.101279
ATP9B	19.0375	22.3982		13.9777	13.2597	10.9589	11.3076		21.8829	16.6917	18.4251	19.6307	17.0681	22.3058	19.1931		-5.13652	0.0307711	-0.78852	0.530447
ATXN2L	68.1118	69.2877		55.8404	47.3097	37.6615	44.3607		62.3592	75.1315	81.0101	67.0578	72.0987	55.1159	54.8635		-4.94018	0.015116	-0.65227	0.537452
ATXN7L3	18.9959	20.7258		16.8889	19.5712	13.5985	15.5929		20.2413	20.0593	31.8045	25.7782	38.0537	21.6064	36.7653		-2.26268	0.0864277	2.66153	0.0323993
AUP1	73.1771	83.6425		93.5867	113.176	101.723	90.5082		152.402	200.718	164.486	97.55	157.388	131.057	146.686		2.86891	0.0926233	5.87363	0.00248639
BAG6	111.526	110.169		99.9377	101.416	106.545	97.0194		106.002	122.466	143.093	125.508	130.101	101.352	152.261		-4.45599	0.0149476	2.09715	0.0797358
BCL11A	114.257	95.3166		45.136	29.3752	32.9948	43.689		57.053	91.733	52.759	115.3	54.1331	45.1526	63.491		-7.42286	0.00311925	-3.03174	0.0267221
BST1	6.64941	5.24212		41.2775	24.2731	25.5798	31.6542		10.6144	10.2207	12.6796	7.42952	19.8975	7.37698	10.6415		9.59434	0.0022538	3.39997	0.0294849
BTF3L4	35.5271	35.2864		31.3949	27.68	39.591	30.8629		17.7018	18.0928	21.1665	31.6503	20.0111	13.6364	22.5131		-1.30098	0.28384	-5.81041	0.00113109
C17orf42	13.8669	15.0534		13.375	11.8726	16.8229	13.8209		31.2484	22.0181	22.0255	17.4449	31.6703	20.1584	23.3326		-0.49806	0.644585	5.23333	0.00129655
C17orf61	107.512	103.932		124.17	90.3443	142.002	95.8567		51.7073	77.6253	59.4221	115.222	41.5661	48.3094	77.0176		0.46495	0.672268	-3.80301	0.00843041
C17orf75	14.252	13.9177		11.7133	11.32	9.71971	12.126		16.5196	17.6327	23.1399	13.1876	18.0233	17.9627	15.3288		-4.60081	0.0153013	2.99892	0.022386
C17orf85	24.7586	29.0811		15.7215	13.5967	10.8494	13.1022		21.682	20.39	24.2183	26.0489	20.2995	18.1362	29.5323		-6.39392	0.00909242	-1.66639	0.213418
C19orf47	12.4321	14.6484		8.53015	6.01631	8.89158	8.971		12.8272	19.8811	20.0975	14.237	18.8589	14.1334	10.7008		-4.15267	0.0193272	1.0856	0.338095
C20orf112	26.9086	27.5918		13.9305	13.9814	10.4171	11.1979		28.8629	21.0846	42.537	35.1893	41.2811	30.1049	34.4429		-10.4232	0.00149478	1.95038	0.0973223
C20orf27	42.696	56.6269		43.7655	44.8885	66.2752	53.5463		92.5846	98.0192	179.429	65.734	157.993	86.9456	93.6527		0.25806	0.820541	3.89583	0.0275018
C20orf4	36.8152	36.413		29.1784	22.4947	21.9066	23.052		47.3701	35.7121	49.6373	34.6105	46.424	44.3624	47.859		-6.37813	0.00748731	3.01596	0.0229775
C20orf54	0.183391	0.453351		17.1433	103.412	26.8694	18.7855		0.256445	3.85577	2.12384	6.8328	12.3354	0.406412	2.0275		7.59971	0.0063801	2.79137	0.0449877
C2orf56	9.4458	8.09678		8.60978	6.89043	6.53012	10.1622		14.2068	12.3559	14.3109	9.26386	19.5415	15.571	22.734		-0.77258	0.485564	3.92668	0.0091597
C3orf75	7.01331	6.96733		8.43296	7.24079	7.91803	7.51739		17.0233	16.8581	11.4803	10.6821	19.785	14.2896	10.1829		3.16033	0.0495251	6.99881	0.000419758
C4orf14	17.7939	16.4129		14.2692	9.77227	15.0695	16.9414		25.0129	33.5616	13.6642	26.055	56.0735	22.6497	36.4056		-1.73815	0.165342	2.90505	0.0244053
C4orf21	2.08703	1.94828		1.59822	0.977754	1.18105	1.79478		2.67247	2.67024	7.83143	2.02306	2.83181	2.78137	2.6951		-2.8087	0.0594887	2.4578	0.0463884
C4orf41	40.0893	41.313		34.0994	31.6533	32.3895	40.7382		17.8163	21.799	18.7772	31.6542	26.5897	20.7109	21.8751		-2.77417	0.0605494	-7.78029	0.000169057
C5orf25	6.3986	5.45959		5.71448	5.84886	7.02374	7.43846		12.3711	12.0889	16.3368	9.75708	17.6991	10.2357	5.59828		0.86947	0.461169	3.95915	0.0062094
C8orf33	46.3807	39.4648		30.5352	16.9467	29.046	22.9606		45.094	40.6945	50.5684	35.4918	88.5558	38.1865	92.9529		-3.62239	0.022355	1.15198	0.289143
CABLES2	10.7708	9.70262		10.1728	8.2787	7.6559	11.0894		18.3955	18.0897	31.6832	10.0851	20.2034	17.6619	18.7741		-1.04769	0.353997	4.30329	0.00355306
CALM3	259.397	204.95		86.0513	92.181	92.9227	116.159		120.363	100.407	153.556	138.151	151.166	124.366	155.691		-6.49332	0.0360217	-4.12576	0.0785163
CAPN10	16.3914	14.3266		20.9328	14.5027	14.6227	16.4294		24.3977	27.3346	35.0099	22.2149	33.7491	17.441	28.0456		0.64202	0.55887	4.73073	0.00475143
CARHSP1	60.2715	58.4573		70.2766	108.165	50.1963	52.2699		17.168	13.9812	54.9774	18.7351	31.1089	19.6942	6.5679		0.66658	0.552087	-4.50454	0.00400982
CBFA2T2	14.185	13.3405		8.51905	10.7293	7.89836	11.7179		14.203	14.0535	26.867	13.3791	19.8683	17.2392	19.782		-3.67298	0.0261227	2.36408	0.0507126
CCDC11	5.38795	4.41387		3.14503	2.26409	2.35522	2.66108		4.78714	8.24206	4.60447	4.67312	4.74159	3.83104	2.54263		-5.11551	0.0300994	-0.44536	0.674719
CCDC120	18.4966	22.0087		13.7199	11.686	14.1869	10.8423		23.8532	23.5033	15.9836	21.7803	14.654	20.5269	15.3299		-4.40743	0.0410421	-0.5019	0.650081
CCDC127	14.4262	11.9072		10.4188	11.439	9.38802	11.5448		16.6775	19.672	17.2883	17.1048	30.5549	25.2603	31.286		-1.92243	0.231127	3.58255	0.0242679
CCDC142	3.31139	3.70026		2.43512	1.82406	1.93503	3.25043		4.02756	5.38704	7.56622	7.41388	5.06103	4.66644	5.60297		-2.95129	0.0446075	4.43472	0.00441957
CCDC80	268.345	136.672		252.144	248.695	157.463	129.034		56.7455	83.7113	65.6042	12.4834	7.56859	122.091	20.6363		-0.03598	0.975432	-3.22128	0.0289111
CCNK	36.3586	33.9906		24.209	22.4699	21.3276	26.4187		33.5011	27.8069	30.8518	28.4945	27.7839	26.8662	31.2878		-6.98877	0.00260861	-3.92121	0.0302885
CD151	221.864	201.08		440.775	539.682	603.434	390.699		285.216	237.325	237.298	267.509	159.188	232.163	507.95		7.61867	0.001675	1.48285	0.181821
CD3EAP	9.13608	10.3279		9.24732	7.04627	8.71853	11.6638		13.0607	15.2789	15.1171	16.5922	17.9399	12.9844	21.346		-0.61338	0.572802	5.38912	0.00631623
CD81	878.499	836.486		986.325	1138.88	1213.27	885.682		663.95	560.377	708.492	584.245	640.721	556.269	733.78		2.68002	0.0616602	-6.24306	0.000616333
CDAN1	8.05559	6.80147		5.68551	4.13932	4.6203	4.80949		8.9763	6.79758	7.24414	9.31756	5.42949	7.72548	5.65876		-4.07521	0.0435539	-0.27109	0.803379
CEP78	23.5623	33.7628		5.75687	5.03464	6.44877	5.13968		7.87297	10.929	15.2137	10.8111	20.7559	6.45467	9.4498		-8.59772	0.0495971	-4.08804	0.0339614
CERS2	66.1751	61.739		72.0763	77.8195	66.3281	67.5345		140.024	98.4103	91.439	85.8738	114.009	111.663	117.785		2.03831	0.1305	7.17119	0.000244351
CHCHD3	84.9276	88.3258		75.7594	77.2439	77.5604	96.6389		105.777	102.488	112.846	110.509	158.667	92.7803	188.005		-1.02487	0.369402	3.35045	0.0138758
CHD6	17.4994	19.1435		10.8919	11.4172	8.54703	11.0021		24.5957	23.4126	23.3667	21.0342	17.5758	28.1341	14.1367		-7.07144	0.00229587	1.53559	0.170022
CHERP	31.2567	29.0323		24.1454	21.5743	24.0806	24.783		35.1177	34.2384	33.509	34.9759	36.951	33.2091	25.3677		-5.06662	0.0232453	1.60579	0.172787
CHST1	8.76978	8.24837		17.365	13.9586	28.8577	18.8099		3.75905	5.45186	5.68933	3.83617	8.95387	11.2465	3.74499		5.19301	0.0114976	-2.48125	0.0454483
CIC	41.6639	38.2325		41.0432	46.9872	38.7333	44.0637		49.1585	61.3873	66.2957	53.2548	61.259	58.4898	52.8865		1.08225	0.360006	6.17088	0.00806474
CMPK2	8.70073	4.77068		11.8386	18.9899	29.4412	22.0666		61.6802	58.1762	31.8285	27.138	36.7675	65.2543	114.371		3.12079	0.0974069	5.81063	0.0321065
CNOT8	61.8123	72.1717		26.8627	34.5856	28.3521	28.479		38.5998	50.2391	59.386	59.751	80.277	45.5121	44.8906		-8.60381	0.011358	-1.97357	0.114008
COIL	20.8339	23.2189		17.8603	15.3529	16.5427	12.7693		20.1651	22.2184	24.2928	20.5537	26.9659	20.2469	20.5397		-3.87808	0.0202035	0.01582	0.988583
COL20A1	0.061412	0.191135		0.051477	0.127102	0.0536015	0.0600507		1e-06	1e-06	0.0359581	1e-06	1e-06	1e-06	1e-06		-0.77477	0.555141	-6.29916	0.000408548
COL5A3	19.5416	10.1487		5.95847	5.28002	8.88495	12.4729		1.58881	2.87711	7.11376	2.46891	3.88421	2.93605	0.781207		-1.58672	0.269052	-4.06543	0.0370897
COL8A2	39.8577	40.5043		106.061	91.417	207.331	211.75		86.3868	34.5385	28.1039	25.9816	26.779	118.12	47.584		5.78327	0.0102066	0.4114	0.69504
COMMD8	18.653	17.426		20.1493	16.0763	15.738	28.615		36.9956	40.1593	21.7377	33.0359	85.2659	38.2907	56.8889		0.56412	0.608406	4.96524	0.00205153
CPSF1	56.5227	59.4828		48.7828	41.859	47.484	46.0046		86.1049	86.6817	67.2408	75.3606	205.395	75.6555	94.8217		-5.53445	0.00643891	3.22949	0.0165146
CPSF3	28.6765	30.1982		30.9994	23.1364	23.0009	29.6932		37.394	43.3152	29.647	34.695	42.3126	34.4018	47.1338		-1.27241	0.280215	3.86876	0.00615192
CRADD	23.5293	27.1887		24.0201	32.0981	17.3216	15.3297		8.03672	8.66391	7.07896	13.5415	3.9843	9.88202	15.856		-0.95297	0.396822	-5.6692	0.000760796
CREB3L1	28.8668	32.8769		31.9856	67.6019	41.3259	13.0118		3.24433	3.89286	5.76716	3.93691	0.994536	15.4721	4.6544		0.18161	0.866777	-6.40018	0.000506271
CREBBP	38.9733	41.7648		25.4746	22.8316	24.3219	24.0465		36.7824	33.2971	42.8434	36.888	36.0195	36.8274	27.6147		-12.4376	0.00757975	-2.09692	0.0843704
CSE1L	47.8462	51.0891		41.6906	35.6483	38.1722	52.7891		67.6245	66.4811	88.5314	58.4917	105.984	64.7683	77.354		-1.88337	0.138419	4.79332	0.00198383
CSRP2BP	48.5707	56.2855		39.2752	31.0464	33.7083	34.1775		52.7177	49.8883	65.8939	36.9827	53.114	53.5317	46.7637		-4.72819	0.0443375	-0.3269	0.765783
CXCL10	24.9032	18.1114		3.07452	0.839227	0.891834	1.48579		11.6494	8.06432	58.9067	5.9794	14.8898	18.1662	4.33526		-8.0799	0.00130241	-1.54684	0.166723
CYTIP	38.85	54.6027		49.3062	50.5304	47.8543	40.8287		12.1658	17.4988	8.21579	15.0225	6.29043	24.606	31.3403		0.1111	0.927556	-4.23096	0.00917771
DCAF7	72.6528	69.5949		63.429	52.5677	51.0259	48.0155		69.9457	63.5165	82.0557	75.8977	100.522	68.3456	78.3395		-4.47375	0.0136681	1.13555	0.293613
DCAKD	25.2767	29.637		15.973	15.178	27.2116	17.602		43.6807	37.7574	44.6162	37.2728	64.8847	37.3228	23.9097		-2.54197	0.0639089	2.72136	0.0385151
DCTN6	50.7056	46.7451		47.9223	53.897	43.0687	47.6507		29.6755	35.993	37.9055	42.2546	36.2904	31.9452	17.8376		-0.23716	0.826295	-3.62343	0.00850614
DDX39B	232.934	208.249		169.72	134.582	165.853	144.954		278.317	257.061	333.497	233.114	290.682	200.12	204.726		-4.62387	0.0196267	1.53111	0.189362
DENND1A	18.4706	16.2882		15.4224	20.8922	14.7856	16.3048		33.4324	25.3274	20.8568	19.5868	23.277	32.4064	20.0025		-0.38341	0.723055	3.27342	0.0217344
DGAT1	22.0594	24.2529		15.8358	18.131	11.8435	14.7518		35.3844	24.6436	16.3807	33.2485	44.0341	32.0036	53.2129		-4.31937	0.0125747	2.15531	0.0687728
DGKA	45.9831	45.3905		62.1617	69.0214	50.3872	68.4284		40.1289	65.1063	33.8587	44.8095	20.8062	31.4586	37.9703		4.16019	0.0245092	-1.55889	0.169802
DNAH17	0.631908	0.54412		0.359959	0.331429	0.412103	0.224071		0.801471	0.318052	1.40225	0.839862	1.72528	0.750498	0.925004		-3.93668	0.0170096	1.78669	0.117344
DNAJC5	38.1526	40.7537		33.7198	41.5714	35.6175	43.4799		44.0961	51.5299	58.375	57.6456	57.3292	52.2929	57.973		-0.38934	0.716911	6.15369	0.00276188
DNMT3B	5.50462	4.20147		1.3665	1.29975	1.38358	1.14469		4.25329	2.80182	7.45869	2.09863	4.01356	3.06418	3.57364		-9.24902	0.0451353	-1.40057	0.234053
DSN1	8.94712	8.31391		10.1101	3.71574	4.84774	7.76087		16.2284	13.5661	82.4139	12.6882	67.7629	14.2124	16.1254		-1.49168	0.228279	3.21525	0.0175607
DTD1	90.9944	78.2728		81.0221	61.6983	83.7875	82.2679		124.913	115.542	188.609	101.255	151.31	103.825	109.106		-0.92493	0.425634	3.42937	0.0253011
DVL3	63.8529	69.7628		56.8005	43.1536	49.8904	46.8733		56.4285	60.1279	118.528	74.7605	85.0668	58.2568	117.737		-4.25902	0.0152404	1.21115	0.265317
EBNA1BP2	121.076	125.476		129.466	102.97	168.508	109.94		73.6774	45.8238	54.9517	103.176	66.1467	60.0308	47.3328		0.15227	0.888199	-6.35578	0.000581562
EHMT1	51.8088	59.0942		35.4818	29.6956	23.1644	33.8357		45.8587	46.6937	56.0405	62.9679	44.7822	45.3923	45.4223		-5.23578	0.00684879	-1.41632	0.273018
EIF2C2	12.0725	16.2496		8.99549	11.4264	10.1527	15.3767		19.3219	27.8452	16.6292	19.7168	67.3947	25.8964	56.0307		-1.16436	0.351519	2.86549	0.0330049
ELF2	104.479	89.5732		60.8231	61.1041	49.0882	61.2312		85.9847	62.7054	92.4652	76.2154	75.6533	78.454	70.4195		-5.45734	0.0292619	-2.53318	0.134702
EPHB4	80.2501	68.6618		42.733	31.1749	30.6581	53.8752		101.418	97.0046	105.114	66.3557	85.012	102.311	110.574		-4.19784	0.0137199	2.33267	0.110675
ERCC2	7.2391	8.11882		8.92706	8.03433	8.43345	7.1024		10.9006	16.6306	17.7575	10.7412	11.8781	9.14884	9.90698		0.72492	0.529852	4.03748	0.00618825
EXD2	6.7418	8.29203		9.83006	6.69063	6.47139	5.43514		12.2189	15.4175	6.75867	13.1575	16.6678	14.4968	11.5736		-0.46367	0.669975	3.33821	0.0302022
EXOC3L1	3.31889	3.01828		3.67995	3.34317	3.08335	4.50934		2.63606	2.29461	2.56126	1.71713	1.57513	3.23102	1.18089		1.40784	0.231942	-3.03583	0.0191172
FAM203A	20.3616	24.0034		14.3243	12.3864	14.4167	16.6181		22.8065	35.2714	15.9773	20.9573	56.9949	19.2833	41.637		-4.23804	0.0454355	1.15198	0.287559
FAM48A	21.4683	21.1134		18.2527	17.2408	13.6782	15.4193		23.5001	30.8926	35.9132	23.1796	25.6491	21.0508	25.9373		-4.39073	0.020433	2.96933	0.0241733
FAM73B	9.07147	7.56349		9.54881	8.21501	8.47404	5.71246		21.3832	13.2756	18.5267	22.0449	17.4649	18.2846	13.7046		-0.37486	0.729013	6.36666	0.0117531
FASTKD5	14.2195	13.2817		17.5385	11.3672	11.9045	17.0319		28.2515	22.7432	36.5461	23.1118	33.4116	23.8355	33.217		0.26114	0.80873	8.7358	5.37636e-05
FBXL6	32.0896	29.5678		25.1916	16.7613	21.8436	20.7269		32.879	38.1053	37.8868	37.5335	75.7997	29.257	32.6179		-4.12766	0.0150968	1.8135	0.113085
FBXO21	36.7711	42.828		39.4042	43.53	31.2333	42.9502		50.9508	70.4878	66.2464	128.887	74.8416	53.757	49.0041		-0.17316	0.873476	3.55878	0.0113118
FBXO32	58.1508	53.1728		38.4921	38.9767	30.7037	59.0667		59.2199	136.028	138.626	70.5588	533.386	93.1436	295.805		-2.18924	0.102229	3.11092	0.0197226
FIP1L1	32.1539	28.5505		32.4211	27.6073	32.7664	27.9444		57.5462	46.3725	41.8887	34.2532	74.3845	57.3942	62.8047		-0.09261	0.933663	4.64991	0.00312102
FITM2	19.3749	19.1104		14.8835	13.7036	9.91757	23.0736		41.4104	29.1611	49.043	19.2852	49.4787	42.6418	35.4996		-1.54716	0.219287	5.02117	0.00236133
FLT1	14.3993	16.0418		15.4509	18.7214	21.8705	21.5933		9.47689	8.55501	10.7108	12.3089	11.8499	11.6378	8.31011		2.41568	0.0742572	-4.79044	0.00841169
FSTL4	1.25059	1.00662		1.4946	5.92013	2.17289	1.51858		0.671417	0.72361	0.44977	0.377928	0.148036	0.413432	0.604217		2.13554	0.107697	-4.08543	0.00516895
FTSJ2	44.1167	44.4741		35.1845	25.1418	29.8873	31.2633		40.0228	58.6308	54.5659	42.0365	55.9141	39.4615	32.1287		-5.51191	0.011554	0.22068	0.832629
GBE1	24.6716	22.1753		45.7018	35.1826	42.0071	38.8356		20.1742	19.7797	27.3959	41.8137	31.616	23.3363	30.836		7.03077	0.00511361	1.23951	0.256709
GNMT	16.7084	20.0935		4.64284	10.252	5.57135	5.79985		13.3722	14.7454	13.4177	24.5429	25.4021	11.4228	6.36054		-5.51849	0.0053162	-1.24812	0.253563
GOLGA7B	11.9298	15.6191		6.1652	9.48289	7.1045	4.52923		0.368415	1.01558	1.14402	2.57312	4.77737	1.78664	1.66619		-3.56709	0.0309335	-6.68644	0.000285673
GPAA1	176.256	169.385		170.279	150.622	196.218	131.989		296.283	280.121	191.001	179.304	525.277	276.845	286.572		-0.84469	0.454992	3.45295	0.0127226
GZF1	23.7892	25.4044		16.3755	9.64951	12.1556	13.3283		21.214	15.8409	24.3166	25.089	24.2842	23.1359	27.6894		-5.80563	0.00667073	-1.00776	0.347715
HEBP1	136.769	120.353		178.637	151.109	212.595	167.577		159.126	139.551	92.0647	123.829	62.063	113.042	73.8381		3.29856	0.0392289	-1.45804	0.189157
HELZ	18.8392	21.2045		8.50702	12.2473	8.3024	9.85874		16.4366	13.0618	19.9972	17.7404	19.9751	18.1238	17.7334		-6.83667	0.00253684	-1.69658	0.185996
HIP1	4.97783	4.72275		6.20067	8.22078	8.97052	7.89175		4.70238	4.88784	8.17634	4.49953	4.12909	4.94263	3.38698		5.63204	0.00682623	-0.10196	0.921794
HNRNPA2B1	973.113	886.937		736.838	621.247	616.151	617.842		780.643	840.929	861.887	811.242	1010.49	637.554	1015.6		-5.69191	0.0125401	-1.28947	0.254531
HNRNPH3	163.769	173.645		168.835	124.089	135.817	142.66		269.646	195.711	202.578	167.122	174.822	239.548	221.114		-2.42818	0.0742849	2.93429	0.0220605
HNRNPUL1	303.76	284.633		215.537	185.542	214.534	207.871		268.898	276.454	278.032	256.577	281.279	259.941	231.571		-7.49988	0.00383743	-2.59058	0.0992666
HPS1	41.2878	43.9331		24.2485	27.0646	28.8638	25.9674		20.1705	22.3204	17.7704	19.7514	23.0075	17.6372	12.8565		-9.90524	0.00115011	-10.2156	1.86389e-05
HSF1	48.6135	48.0439		47.0592	32.4829	40.7764	41.8944		78.2019	73.8055	54.3921	48.1849	156.216	64.3801	104.702		-2.36808	0.0976893	3.05645	0.0222418
HSPB11	7.84257	7.88598		12.3123	9.40328	15.5043	12.2841		6.55774	4.5175	9.97159	6.87937	7.23432	4.9081	5.50735		4.28307	0.0233159	-2.17768	0.0722255
IFT20	28.3197	30.7512		31.2848	29.1325	25.8113	21.8841		47.3672	37.899	42.5818	32.7862	61.0993	45.2777	49.5513		-1.09585	0.335023	4.78263	0.00237415
IL18BP	19.414	16.5517		53.9651	133.062	104.02	65.3729		9.29486	15.5924	35.0036	29.5297	23.3676	8.67605	14.4711		6.93121	0.00298998	-0.19588	0.850276
IL1RL1	4.08516	3.07775		38.4273	36.2844	71.9511	69.811		1.94951	8.38943	9.25133	40.7858	1.01792	3.18812	3.81923		11.4634	0.000487688	0.71288	0.499538
ILF3	101.534	105.513		68.8356	63.3584	65.9259	75.1678		88.9402	87.9445	103.235	95.2905	121.407	81.1069	104.237		-10.0858	0.000561155	-1.25267	0.250653
IMMT	104.094	103.079		88.9125	98.7093	93.9315	89.4893		100.048	124.681	113.77	125.266	144.002	93.209	128.872		-4.48367	0.0176303	2.1768	0.0717417
IMPDH1	54.1303	49.4994		55.8569	51.4959	49.7109	61.0904		63.4296	70.226	76.6109	57.3974	77.5596	62.8743	83.5203		0.76527	0.498505	4.37024	0.0109773
ING3	7.76986	7.8423		6.19922	3.88326	5.16642	5.00617		10.0568	6.98989	7.83315	7.66269	5.88541	8.94267	10.8921		-4.6324	0.0187576	0.55762	0.597149
ITGB1BP2	1.04959	0.673603		0.695456	0.50943	1.07863	0.434342		2.56066	5.60883	4.18267	1.79262	1.59013	2.29504	0.815222		-0.92223	0.431228	3.04667	0.0400077
ITM2B	1100.62	1124.66		1768.59	1747.98	1972.83	1495.11		1264.95	899.894	813.949	1595.47	960.341	1150.85	912.899		7.67919	0.00361573	-0.55193	0.600403
KAT2A	17.2302	21.9642		18.5417	14.9026	18.5876	24.361		27.585	30.5817	33.9706	24.3688	50.1588	26.6932	60.7608		-0.21428	0.846828	3.19986	0.0355352
KCTD20	27.6155	29.9441		18.0043	22.7548	16.367	16.0277		23.6797	30.3667	31.6281	32.1592	47.411	31.1288	33.4737		-5.1459	0.00698346	1.30811	0.233854
KHSRP	51.9459	50.532		40.8057	45.2054	36.1452	34.4295		59.4275	55.1345	46.2901	54.6615	61.4949	53.6053	49.1978		-4.37043	0.0183198	1.33041	0.225271
KIAA0494	71.1273	67.9148		54.1088	63.4049	63.894	43.4998		31.9691	33.4455	26.6531	37.1292	16.9888	36.0808	39.9195		-2.40364	0.0862485	-7.24608	0.000248802
KIAA1539	9.52475	8.67934		16.5848	20.1005	15.9863	23.5835		9.2002	17.8822	10.3401	14.9358	11.1666	11.0749	7.54188		7.16775	0.00207353	1.83763	0.108757
KIAA1967	64.2398	60.217		51.5445	52.4756	40.758	46.6477		69.1232	46.2197	78.6125	65.3004	66.5211	61.4734	76.7138		-4.02237	0.0158605	0.68784	0.514084
KRIT1	16.0866	16.1606		14.2877	10.4009	10.0019	11.0512		15.8717	18.2469	25.0097	16.344	17.2602	16.369	20.2825		-4.40476	0.0216267	2.0387	0.0874696
KRT79	26.1998	14.7317		13.1112	1.03604	1.30871	2.66339		550.657	121.874	67.4762	187.608	360.62	526.59	525.545		-3.14126	0.0354027	6.07238	0.00405036
LIG3	30.3252	26.7056		29.1261	27.774	23.05	33.291		48.65	33.5353	33.5941	34.3687	37.3253	48.9198	59.833		-0.13878	0.897207	3.44456	0.016938
LIPT2	9.73714	10.0051		11.9375	12.4313	14.3566	11.837		8.90406	9.84524	7.28848	11.9099	9.31882	7.17481	11.4677		5.2241	0.00926358	-0.83752	0.432652
LOC100505841	1e-06	1e-06		2.90065	1.05291	2.23849	1.25101		1e-06	1e-06	0.845284	2.36732	1e-06	1e-06	1e-06		60.0869	1.01554e-05	1.54776	0.172646
LOC643669	2.94558	2.07296		1.13367	0.830741	0.432384	0.455172		2.39472	1.23177	3.06979	3.05226	0.893815	1.66637	4.42237		-4.5202	0.0122589	-0.58212	0.588333
LRIF1	56.8375	64.5116		57.2303	42.8986	64.201	59.3772		26.1606	24.7838	27.6682	39.7067	23.2254	22.128	49.6724		-0.83509	0.452579	-5.57974	0.00104946
LRIG2	10.0358	13.4985		7.65245	4.69459	3.99707	7.13415		10.4656	15.7577	12.4511	11.3863	14.1962	13.1741	13.0209		-3.3272	0.0408271	0.61666	0.630655
LRRC24	10.3301	11.5062		10.687	7.62137	10.3718	6.95748		14.9789	15.4072	23.138	13.9619	19.4444	14.3772	16.3646		-1.81351	0.144958	4.75529	0.00552041
LRRC8C	14.0494	13.6197		23.4348	23.0376	28.8144	27.8775		11.8035	22.5614	17.7734	17.9979	15.1476	16.9801	13.6037		10.3164	0.00111225	1.97649	0.0924297
LSM14B	86.9122	93.4366		71.6735	45.2312	69.6817	57.991		100.705	95.03	144.34	86.5099	75.5935	88.9889	104.189		-3.60594	0.0271376	0.92805	0.384637
LYSMD1	13.569	13.4701		7.23418	9.50908	10.9225	10.8231		16.8723	16.3355	20.7983	16.0889	20.8031	20.08	13.245		-3.67486	0.0347132	4.09135	0.00633064
MAGEF1	67.0335	61.2955		41.0592	35.1142	51.1956	37.2745		72.6513	59.8316	69.1614	52.3941	84.9131	59.3576	131.947		-4.81993	0.00858867	0.98233	0.358714
MAP2K2	131.914	135.211		86.8655	88.5237	97.9887	93.6892		131.12	116.423	121.407	132.54	153.759	118.738	107.32		-12.5089	0.000287824	-1.42668	0.198328
MAP4K3	6.2172	7.106		6.99377	7.2115	6.66064	6.56049		8.71749	7.93877	11.0924	7.04791	11.4862	9.63292	11.0317		0.43199	0.729641	3.58532	0.0259409
MBTD1	30.5759	46.834		10.6911	8.02936	6.08757	5.97271		21.9138	25.673	21.4545	20.2242	19.9315	24.3735	18.7373		-6.39826	0.0270389	-2.57096	0.220905
MCM3AP	36.0808	39.6255		29.8609	23.9184	28.8612	30.3566		36.6754	46.5965	46.0694	42.9193	37.6366	37.7209	45.2434		-4.09483	0.0199084	1.56736	0.223647
MCM8	10.9159	12.025		10.3274	5.04377	6.36323	6.62758		16.7899	13.9484	21.5847	10.4551	13.7076	15.3491	11.0963		-3.27383	0.0366343	2.12241	0.0730068
MED22	45.7046	41.9069		29.2917	22.6322	29.9855	33.432		38.5698	55.6031	44.5651	36.1534	48.4322	52.5464	88.521		-4.57647	0.0103591	1.10474	0.305837
MED7	56.4803	59.7439		59.5673	43.8335	52.1341	45.0213		69.0625	96.6496	85.8098	54.9956	71.0297	62.7818	103.208		-2.02623	0.117633	2.91096	0.0231309
MEGF10	1.84815	1.23462		6.00832	6.26659	5.86815	10.8907		0.461974	0.841795	1.0343	4.44944	2.42343	2.1342	1.53732		6.13469	0.0212955	-0.09509	0.927683
MEGF8	9.57535	9.76791		7.44137	8.23015	7.73285	10.6069		17.0128	12.1778	18.7726	14.5239	13.4498	20.7178	12.664		-1.72535	0.180198	5.90048	0.000941303
METTL2A	20.4892	21.2155		20.7254	14.0338	17.7528	19.0764		28.4616	22.9189	36.0572	24.0291	33.09	32.6112	31.6181		-1.90155	0.146382	5.16804	0.00149144
MFAP3	29.7032	26.3019		12.6226	18.1574	13.1825	20.547		27.7574	23.3389	40.8469	22.0845	34.4581	33.615	38.8738		-4.25965	0.0133545	0.88372	0.412252
MLL4	17.4449	17.4115		10.4189	10.0176	11.4683	10.6517		14.8432	18.7492	23.0038	18.4597	17.0483	14.5787	11.8138		-17.4027	0.000408031	-0.59979	0.570579
MMS22L	4.23685	3.58296		2.15501	1.92516	1.45064	3.42468		6.24077	5.47189	3.55773	5.24073	5.57194	6.20801	3.37786		-3.0571	0.0390614	1.90205	0.127262
MPHOSPH8	18.4303	19.0721		16.0569	13.472	12.4354	15.8203		19.7836	17.8935	20.1531	18.567	18.6651	19.5669	26.3241		-4.1218	0.0201296	1.24207	0.25453
MPHOSPH9	15.601	14.744		10.4826	9.97197	7.22964	13.569		15.7361	21.6355	25.4575	26.1901	37.7886	18.4528	17.5008		-3.10074	0.047447	3.3153	0.0139448
MRPL13	23.5979	21.3212		21.0447	14.9336	19.5096	19.5588		39.9576	36.2163	31.596	25.3649	108.614	33.3858	47.6358		-2.05499	0.11048	3.28331	0.014145
MSL1	42.9569	45.4246		35.6631	31.7587	34.0133	32.4211		46.0819	40.2682	54.5054	43.5839	51.3931	47.337	49.2679		-7.31603	0.00682718	1.43259	0.208869
MSL2	36.0873	29.9382		22.3684	23.1909	17.407	17.8589		18.4556	38.1582	30.897	30.6983	32.003	24.9557	39.9349		-4.14273	0.0401449	-0.69708	0.526566
MSL3	56.0043	50.5467		39.9307	27.8154	41.0072	39.5676		69.7813	62.0361	55.5496	44.4552	55.9084	60.3513	48.5571		-3.53739	0.0241096	0.69145	0.52714
MTERF	12.5911	10.8602		11.4887	8.73914	6.24353	9.76694		20.0721	19.4274	27.1847	13.4641	15.2601	13.0572	16.0568		-1.87721	0.133714	3.17295	0.0246245
MTERFD3	28.4816	27.5482		22.7878	19.5606	24.9251	21.3805		31.0173	36.1627	29.4424	31.7779	22.4683	28.3206	36.7009		-4.42527	0.0149409	1.30726	0.23434
MUC16	19.752	19.2497		5.11415	32.3006	5.54051	10.9092		0.669419	0.352558	7.01258	1.53683	2.19781	0.648025	0.0264616		-1.56671	0.215005	-4.98736	0.00247806
NAA16	10.8028	10.4616		11.4438	8.76629	6.64458	7.53947		18.3867	9.12144	33.2071	21.2267	15.7663	15.6101	16.566		-1.97577	0.139371	3.34165	0.0150526
NEK4	19.7021	19.5724		13.5134	10.5895	7.95104	12.044		16.8846	18.6125	26.8111	17.7642	19.6434	16.4188	13.2598		-5.22098	0.013609	-0.99932	0.356099
NEK8	7.90073	7.71175		5.97335	4.01781	6.66092	4.1414		11.1471	11.5524	14.1957	7.23536	8.92644	8.98457	7.4005		-3.35411	0.0427905	2.26234	0.0629831
NFS1	23.9233	27.9786		26.5888	24.795	23.1708	29.0369		31.7311	30.1777	40.6563	32.5493	55.311	31.9972	49.0282		-0.02716	0.981016	3.15111	0.0316992
NKIRAS2	86.7197	102.17		52.2294	61.591	51.1449	69.7992		103.258	101.984	104.016	91.6861	115.594	97.7835	123.042		-4.36719	0.0280475	1.20076	0.38988
NLRX1	36.9546	35.3706		32.7833	21.5729	25.0509	25.1586		11.9761	13.212	12.2776	32.3746	13.8867	16.3627	13.5062		-3.74302	0.0274598	-6.49072	0.000518425
NNT	72.1185	103.1		45.2906	42.4407	20.1177	47.5148		110.105	80.0379	90.3536	83.6415	118.577	110.853	297.978		-3.14875	0.0437542	1.15887	0.326293
NOL11	25.2022	27.396		22.651	18.0781	18.7036	18.9822		33.2359	30.2538	38.2876	33.3765	41.6738	29.646	45.6714		-4.53074	0.013956	4.06786	0.0074249
NOTCH1	55.6315	69.6258		45.2213	26.4066	19.9288	52.6844		173.361	112.863	141.634	108.684	168.467	171.606	230.712		-2.4458	0.0717652	6.00032	0.00997056
NQO1	32.4011	46.1904		707.674	406.269	401.85	365.788		38.2178	124.385	93.5347	355.155	80.4455	34.4827	34.8011		10.5908	0.00374183	1.8496	0.109562
NSFL1C	98.5613	111.051		117.796	106.751	127.39	106.68		161.28	138.781	180.661	115.469	146.309	160.841	130.626		1.20845	0.344675	4.07813	0.0237757
NUAK2	0.948481	0.962645		5.29956	3.87216	5.77516	3.59692		3.96499	1.29163	1.50131	0.976154	1.3656	2.07174	2.97748		13.4186	0.000858456	3.38352	0.0147237
NUDCD1	21.8813	26.2075		23.6469	18.5534	19.711	26.0321		45.3588	57.0006	27.9498	22.1125	109.56	43.3791	64.1065		-0.7916	0.494457	3.03552	0.0190825
NUP133	21.903	24.873		19.5755	16.0422	13.9941	19.1082		27.3538	24.5835	31.0234	20.3428	33.5632	28.9577	31.1408		-3.11399	0.0411538	1.93114	0.135668
NUP43	19.37	21.5665		17.1077	13.2954	10.7609	15.5516		20.0859	24.021	26.2938	21.9556	37.6917	20.9936	19.829		-3.32031	0.0295899	1.52481	0.177964
OCIAD1	167.718	157.178		152.586	145.208	174.554	133.914		254.678	244.83	174.661	190.87	474.001	204.856	304.342		-1.14203	0.317168	3.27185	0.0147283
OPLAH	41.0144	48.9299		49.5062	33.6559	42.242	33.2346		76.5144	87.3261	44.3824	72.7194	118.573	59.3449	90.2079		-1.04185	0.36869	3.49608	0.0165898
PAN2	12.4785	11.2073		8.89765	6.19897	6.46588	8.64268		16.9826	15.4891	10.6048	12.4169	7.44739	16.2293	17.9083		-4.24522	0.0132143	0.91433	0.391093
PASK	2.56962	2.6033		2.39406	2.0881	2.30671	2.75549		4.39401	3.03018	4.51338	3.79982	4.41654	2.74685	4.94362		-1.48122	0.232967	4.8866	0.00265867
PCNP	67.6285	64.1362		68.9578	64.6833	64.0148	64.6915		52.126	50.1777	52.2614	60.6184	48.7994	47.2293	58.1119		-0.14547	0.898369	-5.19112	0.00373178
PELI2	11.9881	12.52		5.97386	3.66288	3.71982	2.76993		17.5486	6.23719	23.364	3.6424	18.9894	15.6353	7.20773		-7.15525	0.00498768	-0.39432	0.706808
PGM2	54.1103	55.633		60.9243	66.1637	54.3882	64.7267		31.8442	36.5093	32.7063	51.5792	30.5766	34.8609	30.5701		2.43499	0.0802091	-6.36608	0.000536527
PHF20L1	27.6387	25.5029		14.6927	14.8949	10.019	19.8817		30.8381	32.091	37.9007	40.5984	81.3504	33.8241	46.3378		-4.16064	0.0192303	3.27763	0.0139353
PHLDB2	14.4777	10.9652		20.1472	48.1517	23.5352	27.4845		4.35428	9.33515	10.896	18.1382	4.97811	9.5006	15.386		3.41587	0.0291006	-1.26092	0.258003
PLA2R1	8.04916	7.48837		13.3548	13.9098	16.3217	22.0823		2.61072	2.94042	4.0123	5.08329	4.28221	4.71439	1.36933		6.08494	0.00550586	-4.81964	0.00240243
PMS2	9.45551	9.79923		9.72205	6.54771	7.36301	8.33948		15.6547	17.5342	14.784	18.5138	16.6885	13.0161	9.42538		-2.27101	0.100937	4.83585	0.00237092
POF1B	3.10868	2.10221		4.14303	5.55114	1.60671	2.23916		0.627283	1.28106	0.87672	0.270738	1.47568	0.598872	0.115556		0.48107	0.656288	-3.82616	0.00765942
POGZ	26.5567	30.5516		21.5915	15.9514	13.7355	14.7938		26.43	23.5008	34.6246	28.0516	29.8982	25.3413	27.2233		-4.61243	0.0108141	-0.34007	0.765646
POLR2B	58.8801	75.1307		67.5414	72.7401	59.1592	58.9717		115.36	120.026	84.4791	95.8967	256.676	118.902	147.093		-0.25032	0.834512	3.49623	0.0248709
POLR2G	26.6494	29.4407		48.607	42.4546	44.4151	32.0242		18.977	18.4196	27.2758	33.5396	29.1295	17.5799	38.4426		3.79525	0.0192281	-0.84661	0.425213
POLRMT	17.3179	19.8119		21.3258	14.3627	16.6899	20.2186		24.5328	29.0305	33.8769	25.6084	31.2145	21.4099	25.8965		-0.28786	0.788541	4.2525	0.0266397
PPCS	51.1829	47.0004		59.8844	45.0866	48.0866	52.815		31.9825	25.5209	36.2701	52.3744	30.2939	29.1361	42.4692		0.56594	0.602496	-3.44506	0.010897
PPIE	45.6894	46.7776		50.3983	46.3615	63.1559	58.8864		31.696	29.9091	32.7625	42.1121	27.8925	28.7084	55.4572		2.24391	0.106019	-3.079	0.0208883
PPIF	47.2276	39.3571		38.2537	36.7315	32.5406	33.826		45.6249	54.1391	67.9418	63.1573	130.926	46.447	84.3668		-2.04206	0.236175	2.53756	0.045021
PPIL1	69.3542	59.318		46.4784	35.4458	41.7444	42.4175		65.696	79.6074	53.1973	57.5425	71.7316	57.3663	77.7992		-4.56095	0.0401619	0.19908	0.857759
PPM1D	35.768	29.9927		20.6149	17.9165	15.8428	21.3963		34.5396	29.9888	26.6845	24.9945	27.2177	30.9575	39.6542		-4.96259	0.0284098	-0.74893	0.528824
PPM1G	164.238	157.859		142.312	118.637	114.866	125.232		169.996	173.924	142.602	158.661	179.449	152.49	172.459		-4.97478	0.00872226	0.45376	0.665938
PPP1R2	70.9758	80.0641		75.2796	64.646	70.085	64.4263		50.5207	40.1015	65.3888	57.396	52.4505	47.083	57.835		-1.36	0.318086	-4.27387	0.0180754
PPP2R5B	11.7605	10.2867		25.7097	19.7661	29.5993	20.6147		11.361	13.781	11.8226	15.0692	16.3533	13.1187	18.1801		6.56709	0.00314205	2.64502	0.071176
PRRC2A	124.226	130.094		104.609	102.784	125.662	126.689		140.448	172.599	210.89	148.253	166.151	136.783	185.074		-1.7233	0.16439	3.99921	0.00520641
PSMC3IP	3.71826	3.02784		2.56636	3.10443	3.38948	4.47112		4.8766	11.2135	6.85083	9.98232	10.8991	5.50289	5.29473		-0.07861	0.941818	4.5935	0.0056757
PSMD12	37.5372	42.6635		45.7168	50.4661	40.6031	40.2846		56.2444	53.7888	57.8701	45.2344	64.6253	53.1663	70.1093		1.15648	0.346421	4.19552	0.0308673
PTPN12	83.7219	75.7024		103.003	127.621	110.629	136.366		62.6861	85.3691	67.2509	104.816	80.8445	66.7065	93.4555		4.88914	0.010081	-0.10329	0.92138
RAB39	0.974845	0.388214		1.29735	1.40258	0.498821	0.252627		0.344456	1e-06	1.37147	1e-06	1e-06	1e-06	1e-06		0.19087	0.862257	-3.75718	0.00843453
RBM6	27.9897	30.8221		26.2184	20.156	18.7937	21.0391		36.6008	28.635	38.2849	35.1672	33.2043	29.6678	25.9675		-3.66996	0.0221186	1.28321	0.2685
REXO1	17.0855	19.1575		18.2512	17.2506	16.0584	14.5096		23.3574	23.9406	33.1464	22.1695	31.9771	24.132	18.6316		-1.25141	0.312443	3.32421	0.0202815
RFC4	33.3932	32.0603		34.1782	26.2783	23.8092	35.7664		76.834	53.6589	49.7355	43.2797	101.337	54.9627	89.2903		-0.9988	0.38651	5.42298	0.0013842
RHEB	91.2306	86.9017		86.6747	97.1994	87.0899	82.541		59.7488	63.9623	66.3017	74.9525	82.4949	59.8634	46.1626		-0.22011	0.836922	-4.47923	0.00294314
RNASE4	135.141	114.105		267.878	268.429	460.064	141.263		77.0491	30.8971	32.3025	156.624	59.3285	56.211	20.5096		2.91012	0.049341	-3.34731	0.0125883
RNASEK	110.812	114.327		207.369	194.328	215.238	157.559		124.014	111.637	139.373	142.592	172.357	128.835	134.614		7.50215	0.00356454	3.42686	0.0114898
RNF11	76.3627	69.6699		112.148	121.576	137.736	140.016		80.5975	71.9951	63.938	111.697	84.4641	75.9615	70.7167		7.96791	0.00255366	0.94011	0.385702
RNF139	70.696	51.0641		68.4903	56.8071	58.4741	44.4837		135.277	111.1	94.1388	63.2455	230.256	140.341	148.658		-0.34083	0.771789	3.21687	0.0457812
RNF145	111.21	89.5805		122.536	90.162	100.624	85.4089		214.023	147.831	145.75	162.047	159.853	223.674	90.8306		-0.08236	0.941338	2.93241	0.0482117
RNF19A	43.6852	39.9307		42.948	37.9513	28.6571	50.3747		88.5826	131.745	38.1547	53.1786	90.2054	103.893	68.0113		-0.50471	0.642401	3.63981	0.00886013
RNF219	21.3285	19.3054		19.3251	15.4325	12.9494	20.2218		31.3716	15.1331	40.1745	26.3774	38.8258	34.7884	33.2242		-1.6854	0.168664	2.91147	0.0226274
RNFT2	2.31185	1.61336		4.84926	3.99124	3.8256	5.86444		7.09248	8.63938	10.3731	13.6979	7.72313	6.11122	5.50871		4.19789	0.0731715	6.65002	0.0220707
RPA1	47.5994	41.3867		40.4301	37.0545	45.6022	41.7061		73.0219	64.3261	44.4155	43.8921	63.4815	66.5965	68.5102		-0.94193	0.454629	2.78203	0.0485849
RPF1	36.2807	39.3505		35.3945	28.967	33.9984	32.3587		29.1155	16.961	28.7773	23.8595	28.1932	20.2391	22.5437		-2.49039	0.0833211	-5.29303	0.00130416
RPRD1B	12.329	13.3035		6.81242	9.53421	7.55597	10.7237		20.2044	19.3238	19.4127	15.6395	15.9665	21.6177	23.39		-3.68057	0.0247543	5.9682	0.00124694
RPTOR	14.6391	13.0455		12.8332	14.0517	13.2388	13.4154		19.7183	15.9665	18.3143	15.2349	19.7668	21.6682	24.985		-0.53583	0.673262	3.76114	0.0194853
RSG1	11.5736	13.2343		20.4663	14.4089	22.1622	19.1864		11.777	8.80724	5.67458	13.1675	5.36663	8.23705	10.4208		3.63587	0.023646	-2.45667	0.0448784
RTKN2	6.78971	3.46637		0.468318	0.905876	0.816471	1.78559		4.49354	3.97397	5.80204	3.19602	6.25485	5.53805	10.0176		-3.91522	0.0432655	0.23454	0.844873
SCAF4	24.4243	25.9119		20.1346	21.0959	16.715	18.4255		30.1098	41.5784	27.4156	26.0699	28.3575	28.2485	29.0731		-4.71981	0.00917309	2.59461	0.0367046
SCARB1	368.577	312.101		168.878	108.56	140.024	128.559		237.943	213.338	241.568	225.653	391.519	215.198	298.098		-7.44538	0.00360534	-2.43368	0.0821396
SCFD2	17.6232	17.5264		11.8515	12.219	11.2547	12.163		31.8135	28.1086	12.9667	17.9247	48.3147	23.1845	25.6094		-20.6062	0.000191981	2.20341	0.0697468
SDF2	135.391	111.089		154.481	149.673	141.198	126.572		259.223	150.674	189.176	153.925	241.579	195.429	208.603		1.39215	0.343004	3.73372	0.0465141
SDHA	155.117	145.451		142.963	136.686	133.416	123.532		178.056	157.914	185.885	178.82	245.539	148.389	226.079		-2.57856	0.0862914	2.827	0.0258356
SEC14L4	9.49841	8.51538		93.3507	101.157	404.825	359.429		9.62283	16.4973	16.216	37.7757	49.3884	8.48862	6.20735		7.66723	0.0040475	1.91485	0.1011
SEMA3C	101.478	75.2026		204.077	193.641	154.074	107.113		7.14194	44.0491	28.4285	51.1292	12.4623	10.3491	37.134		2.88066	0.0651623	-4.20887	0.00426539
SETD1A	20.2914	23.4595		14.2912	13.1818	14.9313	11.7636		17.3351	21.6428	24.1329	22.1902	23.5723	17.7571	14.6036		-5.37598	0.0288878	-0.91449	0.421688
SETD4	13.1758	11.9509		13.2319	10.8836	9.85196	7.46053		19.4217	32.9286	52.3986	45.3491	14.7273	14.9872	18.8658		-1.65082	0.178433	3.38973	0.0126872
SGCA	13.4204	11.7721		35.0867	20.797	35.6583	20.3322		4.63838	7.26063	20.7201	16.4341	18.947	4.40731	5.622		4.49545	0.012261	-1.18519	0.27669
SHROOM1	7.20034	7.23593		11.8051	13.259	14.2227	8.18755		7.8746	10.3741	7.37175	5.00751	3.33238	4.93266	7.42781		3.87463	0.0303888	-1.01334	0.349981
SLAIN1	5.55777	3.96451		8.68003	5.76074	6.56712	4.62489		13.1867	10.4304	9.26119	13.7431	30.6556	11.4311	13.8601		1.33177	0.299584	4.74018	0.0203705
SLC25A37	42.0261	46.7676		23.2042	21.5083	17.5776	23.73		72.9818	26.1904	88.4699	49.6785	59.5976	68.6896	46.8769		-8.4203	0.00157584	1.40347	0.20356
SLC25A41	4.66039	5.26906		4.20041	4.27012	4.00157	5.16251		7.6325	7.04807	19.2853	9.53274	9.57995	7.35042	4.12757		-1.46582	0.247645	2.82524	0.0258231
SLC2A9	19.5241	20.4509		37.2669	44.9631	18.4305	21.746		13.4731	3.48216	14.7454	17.3183	8.87253	11.4725	11.3482		1.68026	0.189405	-3.19994	0.0179578
SLC4A11	3.76183	2.16596		4.84921	4.43604	4.8291	9.41662		15.1496	15.0294	15.2672	7.69692	6.73141	16.4879	32.5062		2.0582	0.18503	4.64343	0.0361092
SMC6	44.8749	51.3881		34.8	27.2409	25.6172	30.5195		38.3087	47.8186	53.0635	38.6947	66.2538	41.3353	60.8434		-5.15248	0.0143335	0.08307	0.937328
SMEK1	51.5921	57.4871		50.1828	36.8722	32.7961	42.0766		70.9289	72.2432	66.0999	59.9756	67.8052	66.0873	50.2063		-2.91362	0.0435473	2.32471	0.10792
SMG8	16.9807	15.9565		16.4059	12.5957	12.1269	13.7738		22.0272	19.2586	23.9169	18.971	31.8367	25.548	25.3438		-2.54479	0.0654449	4.75968	0.00210111
SMYD5	17.5656	19.1826		16.6167	13.7208	16.9253	14.1401		28.5694	23.3742	27.2522	19.3444	31.5276	26.6538	29.904		-2.62701	0.0654254	4.71663	0.00420256
SNX11	23.4652	21.8269		21.1723	17.7628	16.8964	19.4616		26.5773	32.4795	38.0986	25.9454	32.2799	25.3788	27.3487		-3.04884	0.0404629	3.86953	0.00822335
SPG20	73.1747	65.5406		33.5923	39.3108	33.358	35.1119		41.8576	49.3255	51.6668	55.7261	39.3777	48.2755	45.6789		-10.0895	0.00933876	-5.39301	0.0175951
SPOP	38.1751	42.9487		29.2859	26.426	25.1201	33.4495		53.7634	42.6543	30.8055	29.9965	45.8942	48.833	46.036		-4.10559	0.0229372	0.27864	0.790582
SRRD	12.7302	13.1279		6.00388	6.61595	6.94802	10.0815		9.51069	10.3312	11.0071	21.0939	13.5308	14.6673	10.7283		-5.03642	0.0138498	-0.29418	0.778155
STK35	9.06171	8.05433		7.68923	7.30983	6.4608	9.27113		14.1693	11.2575	20.5004	13.5285	16.562	14.9363	16.5608		-1.20263	0.301073	6.18117	0.00239978
STRN4	52.9318	57.0223		39.29	35.1046	36.6819	35.8108		65.8096	52.2946	56.2197	53.1576	50.8566	55.4224	50.2726		-9.05676	0.0132356	-0.10094	0.925785
STX18	11.4559	11.222		16.5062	14.483	15.9721	15.4868		11.8014	13.7636	11.7246	13.1267	8.56499	11.3484	13.6258		10.7265	0.000665438	0.72643	0.493629
STYX	4.76957	4.65391		4.11114	6.33359	3.40643	4.76311		6.14741	10.9753	6.2174	6.99417	13.2775	10.9522	7.38927		-0.29252	0.78865	4.93681	0.00246379
SURF6	31.8067	36.5021		17.8629	13.9098	13.0061	16.091		21.3086	22.0953	26.9089	25.9402	24.0711	20.5959	25.6046		-8.20027	0.00330942	-4.57829	0.0570976
TAB2	66.387	65.1247		64.816	68.0325	50.7071	65.2783		144.627	91.8961	76.7092	99.5652	121.651	150.276	90.218		-0.91551	0.42505	5.08595	0.00212872
TAF15	62.4903	58.5951		69.737	58.6332	61.6144	67.4942		102.522	85.0127	77.7496	72.1182	88.1408	98.8863	109.997		1.15609	0.318363	5.95826	0.000733563
TAF2	22.0812	19.6362		19.0853	22.2188	13.7547	23.7272		36.9617	36.8401	37.5848	25.9231	110.409	44.8478	53.8812		-0.56736	0.601366	4.18207	0.00424319
TAP2	85.6939	84.4994		55.0054	50.4051	51.607	39.4106		94.6254	80.5252	56.6719	54.8728	61.1187	82.592	75.1159		-7.58885	0.00445613	-2.29686	0.0607121
TBC1D8B	3.46286	3.51484		4.01329	4.13239	4.31724	3.51355		4.87304	5.59925	7.30259	4.90869	10.1496	4.85416	6.41406		2.94187	0.0565722	5.35366	0.00168366
TEC	3.87236	3.40344		4.89395	6.65063	2.25398	6.23244		16.8224	25.7921	14.1166	6.42182	27.7549	14.1432	16.0404		0.94261	0.408376	7.60692	0.000130836
TFAM	24.2977	27.2471		19.5715	16.0464	12.5015	15.886		34.7013	23.4057	22.6311	20.6897	34.1348	33.3377	37.599		-4.50812	0.0108802	1.01554	0.348141
THG1L	14.2684	11.9918		7.16121	6.75487	7.74664	6.4054		9.10449	13.589	19.9279	10.5817	16.7894	8.92897	12.2388		-6.51374	0.0468514	-0.31157	0.767949
TKT	510.248	494.796		623.731	549.629	597.812	706.277		267.154	354.059	411.539	467.742	607.222	248.858	319.603		3.76532	0.0254712	-2.63535	0.0376591
TM2D2	34.3418	29.6875		42.6782	45.5338	40.7713	40.3117		26.2831	19.0246	21.9583	41.1275	21.1034	21.8407	13.6368		3.60296	0.125443	-2.42533	0.048885
TMEM101	55.1728	61.3181		42.6584	35.4457	34.0791	37.6486		88.1587	58.9737	66.7872	47.108	71.1481	68.8391	91.3659		-6.15743	0.0107288	1.66752	0.145292
TMEM128	75.1962	62.1208		63.2646	80.9232	70.0773	54.1996		37.9741	41.7742	35.4049	55.9586	29.2767	43.767	53.6877		-0.22602	0.837544	-3.85249	0.0313888
TMEM134	30.3006	34.6964		37.4499	24.8498	38.2685	26.176		11.0113	23.4883	13.8168	30.5527	14.9621	11.7695	15.9244		-0.3198	0.765133	-4.42042	0.00321512
TMEM57	32.4786	31.6815		28.5347	27.7747	24.9601	25.371		28.0843	42.1301	34.2894	34.9901	32.5709	31.0893	31.3386		-5.29009	0.00766585	0.7324	0.488914
TNIP3	0.695719	0.582545		12.6876	11.1702	6.92801	19.2564		0.66795	4.43141	2.79437	6.01817	6.50227	0.786946	5.46145		12.7546	0.000293178	3.9475	0.00626221
TNRC6C	15.0667	13.4424		13.0726	16.652	9.41783	17.6483		29.5645	29.8975	29.5764	25.31	30.4591	37.0242	29.4129		-0.20406	0.848908	10.5326	0.0056623
TOMM34	26.764	26.0417		16.0094	11.7621	19.0592	16.4133		29.3761	29.8609	41.3263	17.3755	33.2699	26.0722	41.9787		-5.16081	0.0129312	1.17411	0.28369
TONSL	3.84788	2.92702		1.94753	1.18309	1.61936	3.18073		6.87683	7.43655	7.54747	3.56415	20.6342	5.99366	11.5428		-2.38782	0.0763491	3.46312	0.0142526
TOR2A	49.374	47.935		39.9549	34.2141	32.63	31.3386		56.3093	60.6982	56.2952	45.7123	71.2229	52.2026	51.4928		-6.28869	0.00543296	2.49675	0.042518
TRA2B	30.6601	33.556		26.1701	20.5435	22.6379	27.102		32.9054	40.8735	32.8766	28.0063	32.8849	30.5468	31.7962		-3.70456	0.0219847	0.28347	0.793932
TRAPPC6A	44.7768	35.6538		12.6173	8.94988	11.0895	11.9992		18.4538	31.3908	21.2288	20.6338	11.8794	16.5546	25.8682		-9.38213	0.0120686	-4.207	0.016801
TRMT12	15.1734	12.6112		15.5369	9.06745	14.1223	10.821		24.984	25.0004	17.9783	18.0883	50.0312	20.1747	24.0719		-0.86196	0.440258	3.47738	0.0153168
TSC1	10.7601	14.3039		6.2996	8.57177	4.45707	6.54451		12.601	13.8221	13.1217	12.6391	13.7236	16.9649	16.9774		-3.46437	0.0444891	0.8793	0.516198
TSG101	61.3558	58.4044		61.3474	78.691	68.9834	61.6825		35.8773	35.2828	48.8282	56.4566	40.6305	36.8756	57.252		1.84692	0.14227	-3.78217	0.00720798
TTC3	40.1169	49.9587		29.6717	32.212	27.8552	44.998		58.3367	61.2805	92.2359	60.5244	111.675	77.8809	85.169		-1.97593	0.145179	3.68069	0.0403845
TUBB3	3.31945	4.7643		115.387	48.6864	112.304	42.3903		2.49046	17.7893	15.733	27.5981	6.45646	4.2292	1.56357		8.986	0.000938965	1.26695	0.245838
UBA2	57.4723	61.3692		49.5291	42.545	53.6837	57.718		76.5261	62.6665	83.153	60.7927	112.548	79.1756	58.095		-2.20237	0.0932775	2.40896	0.0469479
UBE2N	1e-06	1e-06		0.464793	0.509807	1.08162	0.565472		1e-06	1.84424	0.384009	1e-06	1e-06	1e-06	1e-06		69.6766	6.51461e-06	1.54562	0.173153
UBFD1	26.4588	25.7756		24.079	18.1549	24.2165	24.3429		34.1942	24.6283	37.4668	35.9862	46.919	31.4829	30.0435		-2.01679	0.131595	3.35285	0.01418
UBXN11	4.12556	3.40096		4.91725	4.08803	4.72943	2.98327		2.08636	3.29571	3.15056	2.95354	1.27982	1.81882	2.56942		0.61256	0.578047	-2.90897	0.0325916
UIMC1	10.2163	8.79902		7.64466	5.87837	8.90256	10.0209		14.1252	15.1222	15.9449	8.56276	15.3901	12.9167	14.1016		-1.27698	0.271425	3.22284	0.0346002
UNC5D	0.984332	1.14872		1.47453	1.47153	1.10387	0.490991		0.049653	0.89718	0.258093	0.823172	0.119371	0.0431024	0.033265		-0.07712	0.942759	-3.71881	0.00917207
UPF1	57.6333	71.9065		35.6129	38.3788	27.3535	42.2219		59.4983	66.1298	39.5706	66.7621	52.3369	58.9485	45.1879		-4.12618	0.0363578	-1.23417	0.340627
USP21	21.2847	18.4438		16.8955	10.7507	14.6122	13.0463		22.7602	14.3763	32.6469	20.9328	18.9811	21.7399	43.4371		-3.129	0.0383944	1.1128	0.303985
USP39	25.9035	28.6327		26.0184	18.1124	19.5421	27.7172		50.2439	40.937	32.9987	32.4879	39.8481	44.6483	44.1943		-1.65408	0.174997	4.99087	0.00559461
USP42	7.75599	8.34288		5.89409	6.36756	3.64983	4.66972		6.80857	14.3804	10.9189	10.091	13.1803	7.80579	5.69834		-3.59284	0.0293005	1.126	0.298708
USPL1	15.5254	16.7617		11.7153	9.70755	13.2441	8.75989		16.4091	17.8498	24.8783	19.1611	17.098	17.4525	14.5384		-4.07516	0.016976	1.46631	0.191509
UTP23	26.3302	31.7455		26.2177	28.5639	26.6258	19.4395		42.3489	49.4752	37.4633	27.294	95.8774	38.0103	51.4826		-1.16381	0.336178	2.59245	0.0411436
VKORC1L1	23.3375	22.0258		11.3395	13.67	10.5405	21.9142		22.2427	41.3556	27.5787	22.6971	44.0105	33.7411	30.3458		-2.99002	0.0540141	2.88062	0.0246068
WDR81	17.8862	17.8158		12.1443	11.118	11.2157	11.8313		14.1595	14.8174	16.7661	16.9583	13.3663	16.9343	14.9965		-20.3547	0.000232673	-4.13903	0.00600803
WDYHV1	16.1924	19.6054		12.0967	14.431	7.38773	9.54418		32.5596	17.8315	31.9834	15.2395	99.6213	24.414	47.4794		-3.01995	0.0398917	2.24215	0.0598964
WISP1	1.76948	1.95706		6.26845	10.3085	9.9718	16.7567		1.59087	3.57302	1.14435	1.63082	2.04999	8.87539	2.15674		8.21318	0.00248191	0.91908	0.391308
YY1	74.7803	72.638		56.5897	49.5211	52.2258	49.6069		70.107	84.0075	64.7901	68.2133	75.6902	77.7299	69.7231		-10.1542	0.000609357	-0.39426	0.705144
ZBTB12	39.5931	44.3137		26.0897	13.5771	19.2654	31.0133		42.4677	51.6874	68.4536	39.1156	43.1791	40.631	85.3675		-3.52335	0.0301988	1.53833	0.168959
ZBTB5	22.6967	21.6033		12.4212	14.7998	15.4788	12.7848		21.5124	23.0272	15.0765	24.4556	15.3227	20.5563	26.73		-7.95134	0.00154215	-0.86314	0.417556
ZC3H13	18.8559	18.3558		13.5267	13.9947	9.7182	16.1135		21.5794	12.6326	24.2465	21.7688	24.1448	25.7017	26.0502		-3.23716	0.0459213	1.64476	0.149309
ZFP64	34.6869	30.3536		24.7534	22.9668	18.7863	27.2734		47.8507	34.7213	56.3342	36.5788	58.734	46.9477	45.2463		-3.2299	0.0389322	3.4547	0.0256639
ZFYVE28	2.88731	2.95047		2.44854	2.54084	3.32524	3.69872		1.33647	1.00935	1.22512	2.52245	1.62847	2.50446	1.10463		0.13025	0.904441	-4.58928	0.00362703
ZNF131	19.1727	19.7063		16.1804	13.0163	11.932	13.0617		23.7765	26.4292	36.6484	20.1769	29.3311	24.3009	30.8094		-5.54576	0.00927914	4.31826	0.00433799
ZNF16	9.10365	6.95654		6.03595	5.26586	5.79828	5.50621		13.9212	16.2565	16.2419	10.9917	30.0954	17.2515	15.4175		-2.49405	0.224171	4.0869	0.0306983
ZNF202	11.3557	10.3279		6.4057	7.18846	5.95476	6.01727		8.14798	8.23966	9.06346	9.5382	8.85045	8.7059	9.9266		-8.26029	0.00526533	-3.5761	0.0856388
ZNF259	28.8534	30.7403		26.9496	26.0637	23.1243	23.4819		13.5194	16.3462	20.0093	28.2994	17.2372	13.7205	16.631		-3.66424	0.0269013	-5.31975	0.00115544
ZNF326	109.706	107.584		78.6737	68.4923	66.2171	71.0596		81.9206	73.6127	105.124	90.5893	103.805	88.2074	89.0581		-11.0483	0.000908423	-3.9544	0.00648261
ZNF496	42.9066	37.0115		24.2311	19.0379	19.841	21.8988		36.1401	24.7339	39.9716	28.9023	36.9242	37.5797	30.3897		-6.92148	0.0167939	-1.87491	0.160306
ZNF614	2.38083	1.69489		4.27431	2.28171	4.58501	2.53008		1e-06	1e-06	4.7284	0.690802	1e-06	1e-06	1e-06		1.9679	0.13955	-3.89271	0.00792615
ZNF646	14.7441	14.5761		11.6082	10.0552	8.29435	10.9659		15.7015	23.9476	21.0829	14.4621	16.4226	16.7752	13.2066		-4.985	0.0150818	1.90238	0.105319
ZNF687	36.4404	41.4456		28.4483	25.0715	27.3071	23.2149		40.3079	51.9274	38.9197	40.6085	43.6876	34.1922	36.2969		-5.14071	0.033395	0.50832	0.652684
ZNF773	8.7607	10.587		1.17199	1.83742	2.71452	2.92318		4.42653	6.73725	7.78303	2.68439	9.53848	6.60602	6.69656		-6.75262	0.00283621	-2.61059	0.0385333
ZNF793	4.21133	5.12769		0.960621	1.35229	1.50133	1.96314		2.29085	5.06739	5.7776	2.58202	3.3217	4.51117	2.82902		-6.75989	0.00265781	-1.58046	0.172181
ZNF828	41.5254	46.9254		35.3924	33.4235	30.7127	25.0569		48.2653	35.0552	49.1038	52.8372	58.6565	46.9939	51.3937		-3.67283	0.0256856	1.07031	0.355017

## Sheet: Tabel S4I-CC+SC-FDR0.2+N-1st
Table S4I (related to Figure 3): Functional Annotation of the 1st group of genes of Figure S3 by DAVID
Annotation Cluster 1	Enrichment Score: 5.194450834716837
Category	Term	Count	%	PValue	Genes	List Total	Pop Hits	Pop Total	Fold Enrichment	Bonferroni	Benjamini	FDR
GOTERM_BP_FAT	GO:0016568~chromatin modification	15	8.98204	1.24127e-07	KAT2A, CSRP2BP, ING3, EHMT1, CREBBP, SETD1A, UIMC1, ATXN7L3, MSL3, MSL1, USP21, CHD6, DNMT3B, MLL4, ASF1A	120	274	13528	6.17153	8.88707e-05	8.88707e-05	0.000187757
GOTERM_BP_FAT	GO:0006325~chromatin organization	16	9.58084	1.1028e-06	KAT2A, CSRP2BP, ING3, EHMT1, CREBBP, SETD1A, UIMC1, ATXN7L3, MSL3, MSL1, USP21, CHD6, DNMT3B, MLL4, ASF1A, MPHOSPH8	120	378	13528	4.77178	0.000789291	0.000394724	0.0016681
SP_PIR_KEYWORDS	chromatin regulator	11	6.58683	1.48919e-05	MSL3, ING3, EHMT1, MSL1, SETD1A, USP21, CHD6, ASF1A, MLL4, ATXN7L3, UIMC1	165	213	19235	6.02034	0.00248388	0.000828647	0.0181118
GOTERM_BP_FAT	GO:0016569~covalent chromatin modification	9	5.38922	1.4972e-05	KAT2A, CSRP2BP, ING3, EHMT1, CREBBP, USP21, DNMT3B, ATXN7L3, UIMC1	120	126	13528	8.05238	0.0106627	0.00356696	0.0226445
GOTERM_BP_FAT	GO:0051276~chromosome organization	16	9.58084	2.24939e-05	KAT2A, CSRP2BP, ING3, EHMT1, CREBBP, SETD1A, UIMC1, ATXN7L3, MSL3, MSL1, USP21, CHD6, DNMT3B, MLL4, ASF1A, MPHOSPH8	120	485	13528	3.71904	0.0159768	0.00401836	0.0340194
GOTERM_BP_FAT	GO:0016570~histone modification	8	4.79042	9.92294e-05	KAT2A, CSRP2BP, ING3, EHMT1, CREBBP, USP21, ATXN7L3, UIMC1	120	122	13528	7.39235	0.0685863	0.0100989	0.149992
Annotation Cluster 2	Enrichment Score: 3.9551626948036027
Category	Term	Count	%	PValue	Genes	List Total	Pop Hits	Pop Total	Fold Enrichment	Bonferroni	Benjamini	FDR
GOTERM_CC_FAT	GO:0070013~intracellular organelle lumen	28	16.7665	3.06399e-05	ING3, SURF6, SETD1A, NFS1, NAA16, MED22, COIL, TFAM, MCM8, MRPL13, FTSJ2, MLL4, DNMT3B, ERCC2, KAT2A, TAF2, UTP23, MTERF, CREBBP, LIG3, ZNF687, ATXN7L3, CD3EAP, POLRMT, NOL11, ANAPC7, CPSF3, NEK4	88	1779	12782	2.28612	0.00528676	0.00528676	0.0374841
GOTERM_CC_FAT	GO:0043233~organelle lumen	28	16.7665	4.60956e-05	ING3, SURF6, SETD1A, NFS1, NAA16, MED22, COIL, TFAM, MCM8, MRPL13, FTSJ2, MLL4, DNMT3B, ERCC2, KAT2A, TAF2, UTP23, MTERF, CREBBP, LIG3, ZNF687, ATXN7L3, CD3EAP, POLRMT, NOL11, ANAPC7, CPSF3, NEK4	88	1820	12782	2.23462	0.00794301	0.00397942	0.0563873
GOTERM_CC_FAT	GO:0031974~membrane-enclosed lumen	28	16.7665	6.51928e-05	ING3, SURF6, SETD1A, NFS1, NAA16, MED22, COIL, TFAM, MCM8, MRPL13, FTSJ2, MLL4, DNMT3B, ERCC2, KAT2A, TAF2, UTP23, MTERF, CREBBP, LIG3, ZNF687, ATXN7L3, CD3EAP, POLRMT, NOL11, ANAPC7, CPSF3, NEK4	88	1856	12782	2.19127	0.0112153	0.00375251	0.0797397
GOTERM_CC_FAT	GO:0031981~nuclear lumen	23	13.7725	0.000212039	UTP23, KAT2A, TAF2, ING3, SURF6, CREBBP, SETD1A, LIG3, NAA16, ZNF687, MED22, COIL, ATXN7L3, CD3EAP, MCM8, NOL11, ANAPC7, CPSF3, NEK4, DNMT3B, MLL4, FTSJ2, ERCC2	88	1450	12782	2.30397	0.0360218	0.00912973	0.259139
GOTERM_CC_FAT	GO:0005654~nucleoplasm	17	10.1796	0.000263696	KAT2A, TAF2, ING3, SURF6, CREBBP, SETD1A, LIG3, NAA16, MED22, COIL, ATXN7L3, CD3EAP, MCM8, ANAPC7, CPSF3, MLL4, ERCC2	88	882	12782	2.7996	0.0446002	0.00908357	0.322177
GOTERM_CC_FAT	GO:0044451~nucleoplasm part	13	7.78443	0.000360877	TAF2, KAT2A, ING3, SURF6, CREBBP, SETD1A, NAA16, MED22, COIL, ATXN7L3, CD3EAP, MLL4, ERCC2	88	555	12782	3.40225	0.0605334	0.0103532	0.44067
Annotation Cluster 3	Enrichment Score: 2.9247254597912073
Category	Term	Count	%	PValue	Genes	List Total	Pop Hits	Pop Total	Fold Enrichment	Bonferroni	Benjamini	FDR
GOTERM_BP_FAT	GO:0045449~regulation of transcription	43	25.7485	2.60685e-05	EIF2C2, ING3, CNOT8, ZFP64, ZBTB12, SETD1A, ZNF131, PASK, NAA16, ZNF202, MED22, CIC, CBFA2T2, ZNF16, TFAM, MCM8, MBTD1, ZNF773, PSMC3IP, CHD6, MTERFD3, DNMT3B, ZNF496, MLL4, ASF1A, ERCC2, KAT2A, TAF2, CCNK, MTERF, EHMT1, POGZ, ZNF646, CREBBP, ZNF687, ZNF793, ATXN7L3, UIMC1, GZF1, MSL3, KHSRP, USP21, ZBTB5	120	2601	13528	1.86372	0.0184922	0.0037261	0.0394246
SP_PIR_KEYWORDS	Transcription	36	21.5569	5.6205e-05	EIF2C2, ING3, CNOT8, ZFP64, ZBTB12, SETD1A, ZNF131, ZNF202, MED22, CIC, ZNF16, TFAM, MCM8, ZNF773, CHD6, ZNF496, MLL4, ASF1A, MTERFD3, ERCC2, KAT2A, TAF2, CCNK, MTERF, CREBBP, ZNF687, ZNF793, ATXN7L3, UIMC1, GZF1, CD3EAP, MSL3, POLRMT, USP21, KHSRP, ZBTB5	165	2071	19235	2.02643	0.00934258	0.00187554	0.0683416
GOTERM_BP_FAT	GO:0006350~transcription	36	21.5569	8.86561e-05	EIF2C2, ING3, CNOT8, ZFP64, ZBTB12, SETD1A, ZNF131, ZNF202, MED22, CIC, ZNF16, TFAM, MCM8, ZNF773, CHD6, ZNF496, MLL4, ASF1A, MTERFD3, ERCC2, KAT2A, TAF2, CCNK, MTERF, CREBBP, ZNF687, ZNF793, ATXN7L3, UIMC1, GZF1, CD3EAP, MSL3, POLRMT, USP21, KHSRP, ZBTB5	120	2101	13528	1.93165	0.0615076	0.0105243	0.134019
SP_PIR_KEYWORDS	transcription regulation	34	20.3593	0.000193052	ING3, EIF2C2, CNOT8, ZFP64, ZBTB12, SETD1A, ZNF131, ZNF202, MED22, CIC, ZNF16, TFAM, MCM8, ZNF773, CHD6, ZNF496, MLL4, ASF1A, MTERFD3, ERCC2, KAT2A, TAF2, CCNK, MTERF, CREBBP, ZNF687, ZNF793, ATXN7L3, UIMC1, GZF1, MSL3, USP21, KHSRP, ZBTB5	165	2026	19235	1.95636	0.0317285	0.00459552	0.234559
GOTERM_MF_FAT	GO:0003677~DNA binding	35	20.9581	0.000921341	CNOT8, ZFP64, SURF6, ZBTB12, ZNF131, RBM6, ZNF202, CIC, CBFA2T2, ZNF16, TFAM, MCM8, ZNF773, PSMC3IP, PMS2, CHD6, ZNF496, MLL4, DNMT3B, ERCC2, TAF2, MCM3AP, MTERF, UPF1, POGZ, ZNF646, CREBBP, LIG3, ZNF687, ZNF793, GZF1, MSL3, POLRMT, KHSRP, ZBTB5	113	2331	12983	1.72513	0.216	0.0779127	1.20046
GOTERM_BP_FAT	GO:0006355~regulation of transcription, DNA-dependent	24	14.3713	0.0347278	KAT2A, TAF2, EHMT1, CNOT8, CREBBP, PASK, ZNF131, NAA16, ZNF202, MED22, ZNF793, CBFA2T2, ATXN7L3, GZF1, TFAM, ZNF773, PSMC3IP, USP21, CHD6, ASF1A, DNMT3B, MLL4, ZNF496, ERCC2	120	1773	13528	1.526	1	0.546539	41.4119
GOTERM_BP_FAT	GO:0051252~regulation of RNA metabolic process	24	14.3713	0.0432382	KAT2A, TAF2, EHMT1, CNOT8, CREBBP, PASK, ZNF131, NAA16, ZNF202, MED22, ZNF793, CBFA2T2, ATXN7L3, GZF1, TFAM, ZNF773, PSMC3IP, USP21, CHD6, ASF1A, DNMT3B, MLL4, ZNF496, ERCC2	120	1813	13528	1.49233	1	0.595144	48.7571
SP_PIR_KEYWORDS	dna-binding	22	13.1737	0.115334	MTERF, ZFP64, SURF6, ZNF131, ZBTB12, ZNF687, ZNF202, ZNF793, CIC, ZNF16, GZF1, TFAM, MCM8, ZNF773, PSMC3IP, KHSRP, ZBTB5, CHD6, DNMT3B, MLL4, ZNF496, ERCC2	165	1868	19235	1.37295	1	0.544845	77.4748
Annotation Cluster 4	Enrichment Score: 2.8927832045537216
Category	Term	Count	%	PValue	Genes	List Total	Pop Hits	Pop Total	Fold Enrichment	Bonferroni	Benjamini	FDR
GOTERM_MF_FAT	GO:0008270~zinc ion binding	38	22.7545	6.97828e-05	ING3, ZFP64, ZBTB12, ZNF131, RBM6, HELZ, ZNF202, CBFA2T2, ZNF16, ZNF828, MBTD1, ZNF773, RNF219, USP39, RNFT2, PHF20L1, ZNF496, MLL4, DNMT3B, TEC, TAF2, ZC3H13, EHMT1, UPF1, POGZ, ZNF646, CREBBP, LIG3, ZNF687, ZNF793, ATXN7L3, GZF1, MSL2, C4ORF21, ITGB1BP2, SMYD5, ZBTB5, CPSF3	113	2311	12983	1.88921	0.0182546	0.0182546	0.0913926
SP_PIR_KEYWORDS	zinc-finger	31	18.5629	0.00011911	ING3, ZFP64, ZNF131, ZBTB12, HELZ, ZNF202, CBFA2T2, ZNF16, ZNF828, MBTD1, ZNF773, RNF219, RNFT2, USP39, PHF20L1, ZNF496, MLL4, DNMT3B, TEC, ZC3H13, UPF1, POGZ, CREBBP, LIG3, ZNF687, ZNF793, ATXN7L3, GZF1, MSL2, SMYD5, ZBTB5	165	1718	19235	2.10352	0.0196961	0.00330995	0.14478
GOTERM_MF_FAT	GO:0046914~transition metal ion binding	41	24.5509	0.000355771	ING3, ZFP64, ZBTB12, ZNF131, RBM6, HELZ, ZNF202, CBFA2T2, ZNF16, ZNF828, MBTD1, ZNF773, RNF219, USP39, RNFT2, PHF20L1, ZNF496, MLL4, DNMT3B, ERCC2, TEC, TAF2, ZC3H13, EHMT1, UPF1, POGZ, ZNF646, CREBBP, LIG3, ZNF687, ZNF793, ATXN7L3, GZF1, MSL2, PPM1D, C4ORF21, ITGB1BP2, SMYD5, SLC25A37, ZBTB5, CPSF3	113	2785	12983	1.69143	0.0896628	0.0458841	0.465138
SP_PIR_KEYWORDS	zinc	35	20.9581	0.000370059	ING3, ZFP64, ZBTB12, ZNF131, HELZ, ZNF202, CBFA2T2, ZNF16, ZNF828, MBTD1, ZNF773, RNF219, RNFT2, USP39, PHF20L1, ZNF496, MLL4, DNMT3B, TEC, ZC3H13, EHMT1, UPF1, POGZ, CREBBP, LIG3, ZNF687, ZNF793, ATXN7L3, GZF1, MSL2, ITGB1BP2, SMYD5, USP21, ZBTB5, CPSF3	165	2189	19235	1.86393	0.0599397	0.00684439	0.44918
SP_PIR_KEYWORDS	metal-binding	42	25.1497	0.00096756	EIF2C2, ING3, ZFP64, ZBTB12, ZNF131, HELZ, ZNF202, CBFA2T2, ZNF16, ZNF828, MBTD1, ZNF773, RNF219, USP39, RNFT2, PHF20L1, ZNF496, MLL4, DNMT3B, ERCC2, TEC, ZC3H13, EHMT1, UPF1, POGZ, CREBBP, LIG3, ZNF687, ZNF793, ATXN7L3, GZF1, MSL2, PPM1D, ATP13A1, ATP9B, ITGB1BP2, SMYD5, NEK8, USP21, ZBTB5, NEK4, CPSF3	165	2972	19235	1.64744	0.14927	0.0160361	1.17052
GOTERM_MF_FAT	GO:0046872~metal ion binding	48	28.7425	0.0154392	MEGF8, EIF2C2, ING3, ZFP64, ZBTB12, ZNF131, RBM6, HELZ, ZNF202, CBFA2T2, ZNF16, ZNF828, MBTD1, ZNF773, RNF219, USP39, RNFT2, PHF20L1, DNMT3B, ZNF496, MLL4, ERCC2, TEC, TAF2, ZC3H13, EHMT1, UPF1, POGZ, ZNF646, CREBBP, LIG3, ZNF687, ZNF793, ATXN7L3, GZF1, MSL2, PPM1D, C4ORF21, ATP13A1, ATP9B, ITGB1BP2, SMYD5, NEK8, ZBTB5, SLC25A37, NEK4, CPSF3, TBC1D8B	113	4140	12983	1.3321	0.983555	0.366449	18.4428
GOTERM_MF_FAT	GO:0043169~cation binding	48	28.7425	0.0183759	MEGF8, EIF2C2, ING3, ZFP64, ZBTB12, ZNF131, RBM6, HELZ, ZNF202, CBFA2T2, ZNF16, ZNF828, MBTD1, ZNF773, RNF219, USP39, RNFT2, PHF20L1, DNMT3B, ZNF496, MLL4, ERCC2, TEC, TAF2, ZC3H13, EHMT1, UPF1, POGZ, ZNF646, CREBBP, LIG3, ZNF687, ZNF793, ATXN7L3, GZF1, MSL2, PPM1D, C4ORF21, ATP13A1, ATP9B, ITGB1BP2, SMYD5, NEK8, ZBTB5, SLC25A37, NEK4, CPSF3, TBC1D8B	113	4179	12983	1.31967	0.992526	0.387151	21.5733
GOTERM_MF_FAT	GO:0043167~ion binding	48	28.7425	0.0239908	MEGF8, EIF2C2, ING3, ZFP64, ZBTB12, ZNF131, RBM6, HELZ, ZNF202, CBFA2T2, ZNF16, ZNF828, MBTD1, ZNF773, RNF219, USP39, RNFT2, PHF20L1, DNMT3B, ZNF496, MLL4, ERCC2, TEC, TAF2, ZC3H13, EHMT1, UPF1, POGZ, ZNF646, CREBBP, LIG3, ZNF687, ZNF793, ATXN7L3, GZF1, MSL2, PPM1D, C4ORF21, ATP13A1, ATP9B, ITGB1BP2, SMYD5, NEK8, ZBTB5, SLC25A37, NEK4, CPSF3, TBC1D8B	113	4241	12983	1.30038	0.998356	0.41388	27.2518
Annotation Cluster 5	Enrichment Score: 2.5578122865074384
Category	Term	Count	%	PValue	Genes	List Total	Pop Hits	Pop Total	Fold Enrichment	Bonferroni	Benjamini	FDR
GOTERM_BP_FAT	GO:0016569~covalent chromatin modification	9	5.38922	1.4972e-05	KAT2A, CSRP2BP, ING3, EHMT1, CREBBP, USP21, DNMT3B, ATXN7L3, UIMC1	120	126	13528	8.05238	0.0106627	0.00356696	0.0226445
GOTERM_BP_FAT	GO:0016570~histone modification	8	4.79042	9.92294e-05	KAT2A, CSRP2BP, ING3, EHMT1, CREBBP, USP21, ATXN7L3, UIMC1	120	122	13528	7.39235	0.0685863	0.0100989	0.149992
GOTERM_CC_FAT	GO:0000123~histone acetyltransferase complex	5	2.99401	0.000363166	KAT2A, TAF2, ING3, CREBBP, ATXN7L3	88	50	12782	14.525	0.0609054	0.00893683	0.443459
GOTERM_BP_FAT	GO:0006473~protein amino acid acetylation	5	2.99401	0.00111261	KAT2A, CSRP2BP, ING3, CREBBP, NAA16	120	52	13528	10.8397	0.549353	0.0766131	1.66979
GOTERM_BP_FAT	GO:0043543~protein amino acid acylation	5	2.99401	0.00189881	KAT2A, CSRP2BP, ING3, CREBBP, NAA16	120	60	13528	9.39444	0.743556	0.0926283	2.83399
GOTERM_MF_FAT	GO:0016407~acetyltransferase activity	5	2.99401	0.00547771	KAT2A, CSRP2BP, ING3, CREBBP, NAA16	113	82	12983	7.00572	0.765451	0.25175	6.9439
GOTERM_BP_FAT	GO:0016573~histone acetylation	4	2.39521	0.00860804	KAT2A, CSRP2BP, ING3, CREBBP	120	48	13528	9.39444	0.99795	0.278044	12.2581
GOTERM_MF_FAT	GO:0008080~N-acetyltransferase activity	4	2.39521	0.0216928	KAT2A, CSRP2BP, ING3, CREBBP	113	69	12983	6.66051	0.996942	0.409247	24.9753
GOTERM_MF_FAT	GO:0016410~N-acyltransferase activity	4	2.39521	0.0349081	KAT2A, CSRP2BP, ING3, CREBBP	113	83	12983	5.53705	0.999916	0.488307	37.2209
GOTERM_MF_FAT	GO:0004468~lysine N-acetyltransferase activity	3	1.79641	0.0423874	KAT2A, ING3, CREBBP	113	38	12983	9.07056	0.999989	0.510635	43.305
GOTERM_MF_FAT	GO:0004402~histone acetyltransferase activity	3	1.79641	0.0423874	KAT2A, ING3, CREBBP	113	38	12983	9.07056	0.999989	0.510635	43.305
Annotation Cluster 6	Enrichment Score: 2.233769097662092
Category	Term	Count	%	PValue	Genes	List Total	Pop Hits	Pop Total	Fold Enrichment	Bonferroni	Benjamini	FDR
GOTERM_BP_FAT	GO:0006351~transcription, DNA-dependent	10	5.98802	0.00109369	MSL3, KAT2A, CD3EAP, TAF2, TFAM, POLRMT, CCNK, MTERF, MTERFD3, ERCC2	120	292	13528	3.86073	0.543202	0.0833752	1.64163
GOTERM_BP_FAT	GO:0032774~RNA biosynthetic process	10	5.98802	0.00120263	MSL3, KAT2A, CD3EAP, TAF2, TFAM, POLRMT, CCNK, MTERF, MTERFD3, ERCC2	120	296	13528	3.80856	0.577515	0.0692831	1.80376
GOTERM_BP_FAT	GO:0006366~transcription from RNA polymerase II promoter	5	2.99401	0.151239	MSL3, KAT2A, TAF2, CCNK, ERCC2	120	234	13528	2.40883	1	0.79538	91.6288
Annotation Cluster 7	Enrichment Score: 2.1390008851011992
Category	Term	Count	%	PValue	Genes	List Total	Pop Hits	Pop Total	Fold Enrichment	Bonferroni	Benjamini	FDR
SP_PIR_KEYWORDS	methyltransferase	8	4.79042	0.000259022	EHMT1, SETD1A, TRMT12, METTL2A, GNMT, MLL4, FTSJ2, DNMT3B	165	146	19235	6.38771	0.0423398	0.00539319	0.314597
UP_SEQ_FEATURE	domain:SET	5	2.99401	0.00081966	EHMT1, SETD1A, SMYD5, MLL4, SETD4	165	49	19113	11.82	0.340688	0.129644	1.17649
INTERPRO	IPR001214:SET	5	2.99401	0.000883128	EHMT1, SETD1A, SMYD5, MLL4, SETD4	147	49	16659	11.5639	0.238913	0.238913	1.17896
SMART	SM00317:SET	5	2.99401	0.00130578	EHMT1, SETD1A, SMYD5, MLL4, SETD4	90	49	9079	10.2937	0.110946	0.110946	1.4114
SP_PIR_KEYWORDS	s-adenosyl-l-methionine	6	3.59281	0.00189474	EHMT1, SETD1A, TRMT12, GNMT, MLL4, DNMT3B	165	103	19235	6.79082	0.271467	0.0283824	2.28039
UP_SEQ_FEATURE	binding site:S-adenosyl-L-methionine	4	2.39521	0.00955648	EHMT1, GNMT, MLL4, FTSJ2	165	51	19113	9.0852	0.992388	0.556477	12.9413
GOTERM_MF_FAT	GO:0008170~N-methyltransferase activity	4	2.39521	0.010707	EHMT1, SETD1A, GNMT, MLL4	113	53	12983	8.67123	0.941685	0.377274	13.1548
GOTERM_MF_FAT	GO:0016279~protein-lysine N-methyltransferase activity	3	1.79641	0.0309175	EHMT1, SETD1A, MLL4	113	32	12983	10.7713	0.999749	0.471532	33.7333
GOTERM_MF_FAT	GO:0016278~lysine N-methyltransferase activity	3	1.79641	0.0309175	EHMT1, SETD1A, MLL4	113	32	12983	10.7713	0.999749	0.471532	33.7333
GOTERM_MF_FAT	GO:0018024~histone-lysine N-methyltransferase activity	3	1.79641	0.0309175	EHMT1, SETD1A, MLL4	113	32	12983	10.7713	0.999749	0.471532	33.7333
UP_SEQ_FEATURE	region of interest:S-adenosyl-L-methionine binding	3	1.79641	0.0361892	EHMT1, GNMT, MLL4	165	35	19113	9.92883	1	0.817732	41.2564
GOTERM_MF_FAT	GO:0042054~histone methyltransferase activity	3	1.79641	0.0444323	EHMT1, SETD1A, MLL4	113	39	12983	8.83799	0.999994	0.50629	44.8709
GOTERM_MF_FAT	GO:0008276~protein methyltransferase activity	3	1.79641	0.0691383	EHMT1, SETD1A, MLL4	113	50	12983	6.89363	1	0.611595	60.8866
Annotation Cluster 8	Enrichment Score: 2.080992346831544
Category	Term	Count	%	PValue	Genes	List Total	Pop Hits	Pop Total	Fold Enrichment	Bonferroni	Benjamini	FDR
GOTERM_BP_FAT	GO:0016569~covalent chromatin modification	9	5.38922	1.4972e-05	KAT2A, CSRP2BP, ING3, EHMT1, CREBBP, USP21, DNMT3B, ATXN7L3, UIMC1	120	126	13528	8.05238	0.0106627	0.00356696	0.0226445
GOTERM_BP_FAT	GO:0016570~histone modification	8	4.79042	9.92294e-05	KAT2A, CSRP2BP, ING3, EHMT1, CREBBP, USP21, ATXN7L3, UIMC1	120	122	13528	7.39235	0.0685863	0.0100989	0.149992
GOTERM_BP_FAT	GO:0016578~histone deubiquitination	4	2.39521	0.000177991	KAT2A, USP21, ATXN7L3, UIMC1	120	13	13528	34.6872	0.119665	0.0158054	0.268895
GOTERM_CC_FAT	GO:0000123~histone acetyltransferase complex	5	2.99401	0.000363166	KAT2A, TAF2, ING3, CREBBP, ATXN7L3	88	50	12782	14.525	0.0609054	0.00893683	0.443459
GOTERM_BP_FAT	GO:0016579~protein deubiquitination	4	2.39521	0.00148865	KAT2A, USP21, ATXN7L3, UIMC1	120	26	13528	17.3436	0.655846	0.0787752	2.22824
GOTERM_BP_FAT	GO:0070646~protein modification by small protein removal	4	2.39521	0.00205237	KAT2A, USP21, ATXN7L3, UIMC1	120	29	13528	15.5494	0.770306	0.0934121	3.05987
GOTERM_BP_FAT	GO:0070647~protein modification by small protein conjugation or removal	4	2.39521	0.166793	KAT2A, USP21, ATXN7L3, UIMC1	120	160	13528	2.81833	1	0.80868	93.6717
GOTERM_MF_FAT	GO:0003712~transcription cofactor activity	6	3.59281	0.204424	KAT2A, CREBBP, USP21, DNMT3B, CBFA2T2, ATXN7L3	113	363	12983	1.89907	1	0.866341	95.003
GOTERM_MF_FAT	GO:0003713~transcription coactivator activity	4	2.39521	0.2812	KAT2A, CREBBP, USP21, ATXN7L3	113	214	12983	2.14755	1	0.911191	98.678
GOTERM_MF_FAT	GO:0008134~transcription factor binding	7	4.19162	0.281929	KAT2A, PSMC3IP, CREBBP, USP21, DNMT3B, CBFA2T2, ATXN7L3	113	513	12983	1.56775	1	0.905869	98.6954
SP_PIR_KEYWORDS	activator	7	4.19162	0.283994	TFAM, SETD1A, CREBBP, USP21, MED22, DNMT3B, ATXN7L3	165	520	19235	1.56929	1	0.787688	98.2808
GOTERM_MF_FAT	GO:0016563~transcription activator activity	5	2.99401	0.473639	KAT2A, CREBBP, USP21, ATXN7L3, ERCC2	113	410	12983	1.40114	1	0.980555	99.9777
Annotation Cluster 9	Enrichment Score: 1.7729626163426888
Category	Term	Count	%	PValue	Genes	List Total	Pop Hits	Pop Total	Fold Enrichment	Bonferroni	Benjamini	FDR
GOTERM_CC_FAT	GO:0005694~chromosome	10	5.98802	0.00399759	MSL3, NUP133, UPF1, DSN1, CREBBP, SMC6, CHD6, NUP43, DNMT3B, MPHOSPH8	88	460	12782	3.15761	0.499911	0.0829755	4.78302
GOTERM_CC_FAT	GO:0044427~chromosomal part	9	5.38922	0.00470487	MSL3, NUP133, UPF1, DSN1, CREBBP, CHD6, NUP43, DNMT3B, MPHOSPH8	88	386	12782	3.38666	0.557743	0.0866641	5.60707
GOTERM_CC_FAT	GO:0000777~condensed chromosome kinetochore	4	2.39521	0.00717652	NUP133, DSN1, CREBBP, NUP43	88	58	12782	10.0172	0.712351	0.117151	8.43559
GOTERM_CC_FAT	GO:0000779~condensed chromosome, centromeric region	4	2.39521	0.010237	NUP133, DSN1, CREBBP, NUP43	88	66	12782	8.80303	0.831383	0.149414	11.8301
GOTERM_CC_FAT	GO:0000776~kinetochore	4	2.39521	0.0155148	NUP133, DSN1, CREBBP, NUP43	88	77	12782	7.54545	0.933137	0.175701	17.4136
GOTERM_CC_FAT	GO:0000775~chromosome, centromeric region	4	2.39521	0.0524855	NUP133, DSN1, CREBBP, NUP43	88	124	12782	4.68548	0.999911	0.372711	48.2979
GOTERM_CC_FAT	GO:0000793~condensed chromosome	4	2.39521	0.0577586	NUP133, DSN1, CREBBP, NUP43	88	129	12782	4.50388	0.999966	0.387444	51.7105
SP_PIR_KEYWORDS	kinetochore	3	1.79641	0.100801	NUP133, DSN1, NUP43	165	63	19235	5.55123	1	0.537668	72.5373
Annotation Cluster 10	Enrichment Score: 1.747543803819062
Category	Term	Count	%	PValue	Genes	List Total	Pop Hits	Pop Total	Fold Enrichment	Bonferroni	Benjamini	FDR
GOTERM_CC_FAT	GO:0005694~chromosome	10	5.98802	0.00399759	MSL3, NUP133, UPF1, DSN1, CREBBP, SMC6, CHD6, NUP43, DNMT3B, MPHOSPH8	88	460	12782	3.15761	0.499911	0.0829755	4.78302
GOTERM_CC_FAT	GO:0043232~intracellular non-membrane-bounded organelle	26	15.5689	0.0378256	SURF6, CEP78, COIL, TFAM, MRPL13, IFT20, CHD6, FTSJ2, DNMT3B, UTP23, NUP133, UPF1, MTERF, DSN1, CREBBP, SMC6, ZNF687, MSL3, CD3EAP, POLRMT, TSC1, KRIT1, NOL11, NEK4, NUP43, MPHOSPH8	88	2596	12782	1.45474	0.998733	0.324566	37.6127
GOTERM_CC_FAT	GO:0043228~non-membrane-bounded organelle	26	15.5689	0.0378256	SURF6, CEP78, COIL, TFAM, MRPL13, IFT20, CHD6, FTSJ2, DNMT3B, UTP23, NUP133, UPF1, MTERF, DSN1, CREBBP, SMC6, ZNF687, MSL3, CD3EAP, POLRMT, TSC1, KRIT1, NOL11, NEK4, NUP43, MPHOSPH8	88	2596	12782	1.45474	0.998733	0.324566	37.6127
Annotation Cluster 11	Enrichment Score: 1.5495478044753506
Category	Term	Count	%	PValue	Genes	List Total	Pop Hits	Pop Total	Fold Enrichment	Bonferroni	Benjamini	FDR
UP_SEQ_FEATURE	domain:BTB	6	3.59281	0.00763998	ZBTB12, ZNF131, ZBTB5, KCTD20, GZF1, SPOP	165	142	19113	4.89449	0.979677	0.541228	10.4782
INTERPRO	IPR000210:BTB/POZ-like	6	3.59281	0.0207719	ZBTB12, ZNF131, ZBTB5, KCTD20, GZF1, SPOP	147	179	16659	3.79865	0.998476	0.660751	24.5548
INTERPRO	IPR011333:BTB/POZ fold	6	3.59281	0.0216777	ZBTB12, ZNF131, ZBTB5, KCTD20, GZF1, SPOP	147	181	16659	3.75668	0.998855	0.619945	25.4861
INTERPRO	IPR013069:BTB/POZ	5	2.99401	0.0255514	ZBTB12, ZNF131, ZBTB5, GZF1, SPOP	147	127	16659	4.46167	0.999664	0.632028	29.3506
SMART	SM00225:BTB	6	3.59281	0.0309648	ZBTB12, ZNF131, ZBTB5, KCTD20, GZF1, SPOP	90	179	9079	3.38138	0.94104	0.610788	28.9783
UP_SEQ_FEATURE	zinc finger region:C2H2-type 1	8	4.79042	0.185288	ZFP64, ZNF773, ZBTB12, ZNF131, ZBTB5, ZNF202, ZNF793, GZF1	165	542	19113	1.70976	1	0.978838	94.8053
Annotation Cluster 12	Enrichment Score: 1.509056689583127
Category	Term	Count	%	PValue	Genes	List Total	Pop Hits	Pop Total	Fold Enrichment	Bonferroni	Benjamini	FDR
GOTERM_BP_FAT	GO:0007049~cell cycle	16	9.58084	0.00329079	TAF2, CCNK, CSRP2BP, UPF1, DSN1, LIG3, MPHOSPH9, MCM8, PPM1D, PSMD12, PSMC3IP, CABLES2, ANAPC7, NEK4, NUP43, MPHOSPH8	120	776	13528	2.3244	0.905589	0.129623	4.86368
GOTERM_BP_FAT	GO:0022403~cell cycle phase	10	5.98802	0.0108116	TAF2, MPHOSPH9, PPM1D, CCNK, DSN1, PSMC3IP, LIG3, ANAPC7, NEK4, NUP43	120	414	13528	2.72303	0.999583	0.309701	15.1622
GOTERM_BP_FAT	GO:0022402~cell cycle process	12	7.18563	0.0109946	TAF2, MPHOSPH9, CSRP2BP, PPM1D, CCNK, PSMD12, DSN1, PSMC3IP, LIG3, ANAPC7, NEK4, NUP43	120	565	13528	2.39434	0.999635	0.302188	15.3993
GOTERM_BP_FAT	GO:0051301~cell division	8	4.79042	0.0153884	CCNK, DSN1, LIG3, CABLES2, ANAPC7, NEK4, NUP43, ERCC2	120	295	13528	3.05718	0.999985	0.370392	20.9096
GOTERM_BP_FAT	GO:0000278~mitotic cell cycle	9	5.38922	0.0164294	TAF2, MPHOSPH9, PPM1D, CCNK, PSMD12, DSN1, ANAPC7, NEK4, NUP43	120	370	13528	2.74216	0.999993	0.377771	22.165
SP_PIR_KEYWORDS	cell division	7	4.19162	0.025849	CCNK, DSN1, LIG3, CABLES2, ANAPC7, NEK4, NUP43	165	264	19235	3.09102	0.987394	0.268309	27.279
GOTERM_BP_FAT	GO:0000279~M phase	8	4.79042	0.0261417	MPHOSPH9, CCNK, DSN1, PSMC3IP, LIG3, ANAPC7, NEK4, NUP43	120	329	13528	2.74124	1	0.480047	33.014
SP_PIR_KEYWORDS	cell cycle	9	5.38922	0.0442871	MCM8, PPM1D, CCNK, DSN1, LIG3, CABLES2, ANAPC7, NEK4, NUP43	165	461	19235	2.27588	0.999482	0.376742	42.3605
GOTERM_BP_FAT	GO:0000087~M phase of mitotic cell cycle	6	3.59281	0.0477649	MPHOSPH9, CCNK, DSN1, ANAPC7, NEK4, NUP43	120	224	13528	3.01964	1	0.622214	52.3043
SP_PIR_KEYWORDS	mitosis	5	2.99401	0.0715904	CCNK, DSN1, ANAPC7, NEK4, NUP43	165	183	19235	3.18513	0.999996	0.479467	59.4854
GOTERM_BP_FAT	GO:0000280~nuclear division	5	2.99401	0.129018	CCNK, DSN1, ANAPC7, NEK4, NUP43	120	220	13528	2.56212	1	0.776545	87.6245
GOTERM_BP_FAT	GO:0007067~mitosis	5	2.99401	0.129018	CCNK, DSN1, ANAPC7, NEK4, NUP43	120	220	13528	2.56212	1	0.776545	87.6245
GOTERM_BP_FAT	GO:0048285~organelle fission	5	2.99401	0.143139	CCNK, DSN1, ANAPC7, NEK4, NUP43	120	229	13528	2.46143	1	0.789412	90.3353
Annotation Cluster 13	Enrichment Score: 1.4810557741969106
Category	Term	Count	%	PValue	Genes	List Total	Pop Hits	Pop Total	Fold Enrichment	Bonferroni	Benjamini	FDR
SP_PIR_KEYWORDS	methyltransferase	8	4.79042	0.000259022	EHMT1, SETD1A, TRMT12, METTL2A, GNMT, MLL4, FTSJ2, DNMT3B	165	146	19235	6.38771	0.0423398	0.00539319	0.314597
GOTERM_BP_FAT	GO:0043414~biopolymer methylation	3	1.79641	0.123279	EHMT1, FTSJ2, DNMT3B	120	69	13528	4.90145	1	0.770511	86.3319
GOTERM_BP_FAT	GO:0032259~methylation	3	1.79641	0.144109	EHMT1, FTSJ2, DNMT3B	120	76	13528	4.45	1	0.787217	90.4996
GOTERM_BP_FAT	GO:0006730~one-carbon metabolic process	3	1.79641	0.258738	EHMT1, FTSJ2, DNMT3B	120	112	13528	3.01964	1	0.902716	98.9206
Annotation Cluster 14	Enrichment Score: 1.441741439594665
Category	Term	Count	%	PValue	Genes	List Total	Pop Hits	Pop Total	Fold Enrichment	Bonferroni	Benjamini	FDR
SP_PIR_KEYWORDS	nuclease	6	3.59281	0.00214915	PAN2, EIF2C2, REXO1, PMS2, EXD2, CPSF3	165	106	19235	6.59863	0.301831	0.0294974	2.58291
GOTERM_MF_FAT	GO:0004518~nuclease activity	6	3.59281	0.0118497	PAN2, EIF2C2, REXO1, PMS2, EXD2, CPSF3	113	158	12983	4.36306	0.95702	0.325225	14.46
SP_PIR_KEYWORDS	exonuclease	3	1.79641	0.0519581	PAN2, REXO1, EXD2	165	43	19235	8.13319	0.999865	0.407942	47.7424
GOTERM_MF_FAT	GO:0004527~exonuclease activity	3	1.79641	0.076506	PAN2, REXO1, EXD2	113	53	12983	6.50342	1	0.632331	64.7541
SP_PIR_KEYWORDS	Endonuclease	3	1.79641	0.103493	EIF2C2, PMS2, CPSF3	165	64	19235	5.46449	1	0.532422	73.5208
GOTERM_MF_FAT	GO:0004519~endonuclease activity	3	1.79641	0.213461	EIF2C2, PMS2, CPSF3	113	100	12983	3.44681	1	0.845011	95.6977
Annotation Cluster 15	Enrichment Score: 1.3298243768242053
Category	Term	Count	%	PValue	Genes	List Total	Pop Hits	Pop Total	Fold Enrichment	Bonferroni	Benjamini	FDR
GOTERM_BP_FAT	GO:0046128~purine ribonucleoside metabolic process	3	1.79641	0.0266873	GNMT, DNMT3B, DCAKD	120	29	13528	11.6621	1	0.475647	33.5793
GOTERM_BP_FAT	GO:0042278~purine nucleoside metabolic process	3	1.79641	0.0266873	GNMT, DNMT3B, DCAKD	120	29	13528	11.6621	1	0.475647	33.5793
GOTERM_BP_FAT	GO:0009119~ribonucleoside metabolic process	3	1.79641	0.0618087	GNMT, DNMT3B, DCAKD	120	46	13528	7.35217	1	0.671819	61.9045
GOTERM_BP_FAT	GO:0009116~nucleoside metabolic process	3	1.79641	0.108904	GNMT, DNMT3B, DCAKD	120	64	13528	5.28437	1	0.765048	82.5199
Annotation Cluster 16	Enrichment Score: 1.3286053960188728
Category	Term	Count	%	PValue	Genes	List Total	Pop Hits	Pop Total	Fold Enrichment	Bonferroni	Benjamini	FDR
GOTERM_BP_FAT	GO:0051236~establishment of RNA localization	5	2.99401	0.0105285	NUP133, UPF1, TSC1, KHSRP, NUP43	120	97	13528	5.811	0.999489	0.315398	14.7942
GOTERM_BP_FAT	GO:0050657~nucleic acid transport	5	2.99401	0.0105285	NUP133, UPF1, TSC1, KHSRP, NUP43	120	97	13528	5.811	0.999489	0.315398	14.7942
GOTERM_BP_FAT	GO:0050658~RNA transport	5	2.99401	0.0105285	NUP133, UPF1, TSC1, KHSRP, NUP43	120	97	13528	5.811	0.999489	0.315398	14.7942
GOTERM_BP_FAT	GO:0006403~RNA localization	5	2.99401	0.0116793	NUP133, UPF1, TSC1, KHSRP, NUP43	120	100	13528	5.63667	0.999778	0.306305	16.281
GOTERM_BP_FAT	GO:0015931~nucleobase, nucleoside, nucleotide and nucleic acid transport	5	2.99401	0.0175892	NUP133, UPF1, TSC1, KHSRP, NUP43	120	113	13528	4.9882	0.999997	0.38657	23.5418
GOTERM_BP_FAT	GO:0051028~mRNA transport	4	2.39521	0.0412787	NUP133, UPF1, KHSRP, NUP43	120	87	13528	5.18314	1	0.588412	47.1464
GOTERM_BP_FAT	GO:0006405~RNA export from nucleus	3	1.79641	0.0503646	NUP133, UPF1, TSC1	120	41	13528	8.24878	1	0.632129	54.2364
GOTERM_BP_FAT	GO:0051168~nuclear export	3	1.79641	0.0977587	NUP133, UPF1, TSC1	120	60	13528	5.63667	1	0.750865	78.904
SP_PIR_KEYWORDS	mRNA transport	3	1.79641	0.131408	NUP133, KHSRP, NUP43	165	74	19235	4.72604	1	0.568402	81.9779
GOTERM_BP_FAT	GO:0006913~nucleocytoplasmic transport	4	2.39521	0.158287	NUP133, MCM3AP, UPF1, TSC1	120	156	13528	2.8906	1	0.806995	92.6207
GOTERM_BP_FAT	GO:0051169~nuclear transport	4	2.39521	0.162523	NUP133, MCM3AP, UPF1, TSC1	120	158	13528	2.85401	1	0.803694	93.1629
GOTERM_BP_FAT	GO:0046907~intracellular transport	6	3.59281	0.691814	NUP133, MCM3AP, UPF1, TSC1, SLC25A37, TOMM34	120	657	13528	1.02953	1	0.999056	100
Annotation Cluster 17	Enrichment Score: 1.3225863679205916
Category	Term	Count	%	PValue	Genes	List Total	Pop Hits	Pop Total	Fold Enrichment	Bonferroni	Benjamini	FDR
INTERPRO	IPR000953:Chromo domain	3	1.79641	0.0318697	MSL3, CHD6, MPHOSPH8	147	32	16659	10.6244	0.999955	0.671102	35.258
SMART	SM00298:CHROMO	3	1.79641	0.0389672	MSL3, CHD6, MPHOSPH8	90	32	9079	9.45729	0.972046	0.591107	35.1047
GOTERM_MF_FAT	GO:0003682~chromatin binding	5	2.99401	0.0407918	MSL3, UPF1, CHD6, ASF1A, MPHOSPH8	113	150	12983	3.82979	0.999983	0.51953	42.0548
GOTERM_CC_FAT	GO:0000785~chromatin	5	2.99401	0.0474637	MSL3, UPF1, CHD6, DNMT3B, MPHOSPH8	88	200	12782	3.63125	0.999778	0.373345	44.8434
GOTERM_BP_FAT	GO:0006333~chromatin assembly or disassembly	4	2.39521	0.101404	MSL3, CHD6, ASF1A, MPHOSPH8	120	127	13528	3.55066	1	0.751405	80.1572
Annotation Cluster 18	Enrichment Score: 1.3209009948441743
Category	Term	Count	%	PValue	Genes	List Total	Pop Hits	Pop Total	Fold Enrichment	Bonferroni	Benjamini	FDR
GOTERM_BP_FAT	GO:0006390~transcription from mitochondrial promoter	3	1.79641	0.00112473	TFAM, POLRMT, MTERF	120	6	13528	56.3667	0.553252	0.0706324	1.68785
GOTERM_CC_FAT	GO:0009295~nucleoid	3	1.79641	0.0187385	TFAM, POLRMT, MTERF	88	31	12782	14.0565	0.962089	0.196009	20.6623
GOTERM_CC_FAT	GO:0042645~mitochondrial nucleoid	3	1.79641	0.0187385	TFAM, POLRMT, MTERF	88	31	12782	14.0565	0.962089	0.196009	20.6623
GOTERM_CC_FAT	GO:0005739~mitochondrion	14	8.38323	0.0317887	MTERF, NFS1, CMPK2, POLRMT, TFAM, MRPL13, C2ORF56, THG1L, SLC25A37, C4ORF14, DNAJC5, MTERFD3, TOMM34, SLC25A41	88	1087	12782	1.87075	0.99626	0.294816	32.6507
GOTERM_CC_FAT	GO:0044429~mitochondrial part	9	5.38922	0.0492398	TFAM, POLRMT, MRPL13, MTERF, NFS1, SLC25A37, C4ORF14, SLC25A41, TOMM34	88	595	12782	2.19706	0.999839	0.368562	46.0887
GOTERM_CC_FAT	GO:0031980~mitochondrial lumen	5	2.99401	0.0690574	TFAM, POLRMT, MRPL13, MTERF, NFS1	88	227	12782	3.19934	0.999996	0.430333	58.3375
GOTERM_CC_FAT	GO:0005759~mitochondrial matrix	5	2.99401	0.0690574	TFAM, POLRMT, MRPL13, MTERF, NFS1	88	227	12782	3.19934	0.999996	0.430333	58.3375
GOTERM_BP_FAT	GO:0007005~mitochondrion organization	4	2.39521	0.121888	TFAM, POLRMT, MTERF, TOMM34	120	138	13528	3.26763	1	0.771733	86.0001
SP_PIR_KEYWORDS	mitochondrion	11	6.58683	0.173826	TFAM, POLRMT, MRPL13, MTERF, C2ORF56, NFS1, SLC25A37, MTERFD3, SLC25A41, CMPK2, TOMM34	165	832	19235	1.54127	1	0.642515	90.1976
UP_SEQ_FEATURE	transit peptide:Mitochondrion	7	4.19162	0.213347	TFAM, POLRMT, MTERF, C2ORF56, NFS1, MTERFD3, CMPK2	165	467	19113	1.73631	1	0.982811	96.8675
SP_PIR_KEYWORDS	transit peptide	7	4.19162	0.221515	TFAM, POLRMT, MTERF, C2ORF56, NFS1, MTERFD3, CMPK2	165	476	19235	1.71435	1	0.707688	95.2438

## Sheet: Tabel S4J-CC+SC-FDR0.2+N-2nd
Table S4J (related to Figure 3): Functional Annotation of the 2nd group of genes of Figure S3 by DAVID
Annotation Cluster 1	Enrichment Score: 1.3677985252362153
Category	Term	Count	%	PValue	Genes	List Total	Pop Hits	Pop Total	Fold Enrichment	Bonferroni	Benjamini	FDR
SP_PIR_KEYWORDS	carbohydrate metabolism	3	4.6875	0.0257609	PGM2, PPP1R2, CHST1	64	76	19235	11.8637	0.976057	0.71178	26.5879
GOTERM_BP_FAT	GO:0019318~hexose metabolic process	4	6.25	0.0273398	PGM2, GBE1, PPP1R2, CHST1	47	192	13528	5.99645	0.999945	0.999945	31.5979
GOTERM_BP_FAT	GO:0005996~monosaccharide metabolic process	4	6.25	0.0394901	PGM2, GBE1, PPP1R2, CHST1	47	222	13528	5.18612	0.999999	0.991386	42.4192
GOTERM_BP_FAT	GO:0005976~polysaccharide metabolic process	3	4.6875	0.0546622	GBE1, PPP1R2, CHST1	47	111	13528	7.77918	1	0.99309	53.7038
GOTERM_BP_FAT	GO:0006006~glucose metabolic process	3	4.6875	0.0952964	PGM2, GBE1, PPP1R2	47	153	13528	5.64372	1	0.993684	74.6405

[truncated: 1 more sheets: Tabel S4K-CC+SC-FDR0.2+N-3rd]
