# Supplementary material for: Molecular Homology and Difference between Spontaneous Canine Mammary Cancer and Human Breast Cancer
Source: Oxford University Press journal article supplement (doi:10.1158/0008-5472.can-14-0392), 2014-08-01
Supplement: 00085472can140392-sup-126768_1_supp_2522431_n7klgk.xlsx [file 00085472can140392-sup-126768_1_supp_2522431_n7klgk.xlsx]

## Sheet: Table S6A-ER-FDR0.2
Table S6A (related to Figure 6): Differentially expressed genes between ER+ and ER- canine tumors at FDR ≤ 0.2
By conducting t-tests* with ln(FPKM) of RNA-seq data shown in Table S3H
	ER+						ER-
Gene	T32510	T401130	T401188	T402421	T403802		T115	T159	T341400	T406434	T518	T5	T76		t-value	p-value	average ER+	average ER-	q-value
P2RY11	1e-06	1e-06	1e-06	1e-06	1e-06		0.742467	0.233416	0.312732	0.655439	1.6458	0.0384232	0.697212		-28.2061	1.31424e-07	1e-06	0.617927	1.40815e-05
TCF25	141.923	143.097	150.785	118.834	145.486		68.757	58.3671	80.9343	57.2788	70.1028	53.133	69.3252		11.0699	6.60559e-07	140.025	65.414	2.81631e-05
ATG16L2	7.20709	5.77775	4.87705	5.95119	5.19872		1.40285	1.64804	2.76877	1.41375	1.4775	1.90391	1.63443		10.8114	8.35756e-07	5.80236	1.74989	4.22446e-05
TTC36	1.55421	1.40621	3.7526	0.537878	1.4683		1e-06	1e-06	1e-06	1e-06	1e-06	1e-06	1e-06		46.1145	1.32264e-06	1.74384	1e-06	5.63261e-05
UROD	70.5513	76.6615	83.4153	79.9242	96.4685		37.6129	45.1155	45.0425	37.1482	39.7667	35.1185	32.9129		10.7371	2.08663e-06	81.4042	38.9596	7.04077e-05
PKMYT1	7.74735	4.95151	7.78353	6.60591	6.06972		21.4939	24.8332	20.3338	25.873	15.4167	17.0611	24.1192		-10.3751	2.63846e-06	6.6316	21.3044	8.44892e-05
PC	59.9594	61.4209	72.6283	79.2638	102.998		19.1042	14.1453	23.9486	19.0314	33.3847	19.7393	21.3921		9.0458	5.17442e-06	75.2541	21.5351	9.85707e-05
TK1	18.5747	14.9095	22.3917	12.773	17.8336		71.6678	67.4544	50.0997	52.9418	59.7585	55.7503	141.266		-8.34073	8.92034e-06	17.2965	71.2769	0.000112652
SLC13A3	19.4201	33.4674	52.3932	131.957	36.8642		0.109329	1.68727	1.63281	0.362386	1.00575	0.452129	0.0773653		8.0994	1.27033e-05	54.8204	0.761006	0.000126734
CYP1B1	250.19	273.583	220.682	449.373	169.767		45.9041	38.981	23.3136	13.6057	28.8653	65.9606	13.2773		7.92769	1.44803e-05	272.719	32.8439	0.000140815
CCDC75	6.58426	7.20525	6.98192	5.9691	8.34982		14.5572	11.2252	12.5808	12.1145	10.9916	15.9766	14.4299		-8.07982	1.47634e-05	7.01807	13.1251	0.000154897
CEP55	3.13442	2.6296	2.96183	2.5519	1.74122		6.6856	9.08549	8.58743	10.4467	14.3449	5.28998	9.36034		-7.77041	1.53662e-05	2.60379	9.11435	0.000168978
TERF2IP	143.398	137.097	141.112	146.024	154.04		81.0858	79.3607	73.5776	77.5845	98.0774	68.0507	101.598		9.62359	1.90749e-05	144.334	82.7621	0.00018306
IST1	111.844	106.947	123.474	100.124	98.0196		67.7007	66.6691	69.8594	59.2187	81.6907	64.6116	74.0364		7.90787	2.00727e-05	108.082	69.1124	0.000197141
ABCC11	238.652	277.944	148.521	613.962	303.856		3.16695	6.91932	25.4351	2.83879	4.4371	1.58088	0.455655		8.4677	2.04423e-05	316.587	6.40483	0.000211223
LINS	33.5261	30.4588	29.9152	30.8218	25.4536		19.8568	17.8936	18.4657	17.3592	21.2791	15.3141	20.1921		7.81912	2.22557e-05	30.0351	18.6229	0.000225304
NUF2	4.42188	4.93521	7.23612	4.07764	5.00113		16.9998	11.8302	16.2242	12.2753	14.8006	13.5866	29.9667		-7.41499	2.27824e-05	5.1344	16.5262	0.000239386
GABARAP	376.035	427.509	384.49	422.44	448.224		248.375	260.389	332.173	269.938	312.494	249.739	265.957		7.39665	2.3464e-05	411.74	277.009	0.000253468
NIPA1	5.08359	5.25878	3.51338	4.31209	4.98953		11.0994	10.6709	9.42004	11.8456	8.05949	11.6339	8.73655		-8.46063	2.64933e-05	4.63147	10.2094	0.000267549
ESR1	29.0279	24.3441	8.61703	23.3251	12.7495		2.09486	1.52287	2.29343	0.617321	0.41479	2.76315	0.502633		7.26572	2.77468e-05	19.6127	1.45844	0.000281631
TRAIP	2.69286	2.13962	2.80838	1.78788	2.65742		4.76009	6.8619	6.50964	6.15207	6.57847	3.76457	6.46423		-7.32414	3.30377e-05	2.41723	5.87014	0.000295712
MCEE	160.938	105.396	162.009	139.781	142.133		45.2531	31.7855	58.6753	58.9442	76.8242	48.0106	66.8697		7.17531	3.31481e-05	142.051	55.1947	0.000309794
IQGAP2	66.7419	44.8969	78.7743	86.5434	50.7624		20.6163	16.9965	15.9707	9.71103	13.475	17.9305	30.8982		7.15507	3.3613e-05	65.5438	17.9426	0.000323875
POLE	6.66077	3.77415	4.19695	4.25904	3.88062		11.2934	10.406	13.3033	21.1632	10.4896	10.8629	13.8901		-7.4229	3.43014e-05	4.55431	13.0584	0.000337957
KTI12	33.96	46.9123	41.0295	40.5857	44.4576		22.9049	22.6024	31.4186	20.8902	25.4011	21.6641	22.1727		7.28306	3.65081e-05	41.389	23.8649	0.000352038
ACADVL	150.805	220.631	183.924	192.141	171.151		78.225	88.3874	116.329	114.124	93.1966	62.6694	92.8537		6.82737	4.63505e-05	183.73	92.255	0.00036612
PLSCR1	69.9694	47.9461	48.9616	46.4957	33.7389		15.5583	18.7712	11.25	8.13298	11.2289	13.8097	25.3548		6.75472	5.01289e-05	49.4223	14.8723	0.000380201
INPP5B	29.8438	23.2947	30.1566	21.3912	24.386		10.3301	15.203	15.0286	13.5032	15.5923	10.7278	13.5722		7.03064	5.30814e-05	25.8145	13.4225	0.000394283
TMEM45B	53.3557	74.1642	65.2128	150.237	37.2191		2.19173	10.6417	19.5978	6.11354	7.94241	2.80731	5.57073		6.5465	6.50386e-05	76.0378	7.83789	0.000408364
PRMT7	41.4844	38.8593	40.0824	40.8691	43.6674		16.2256	20.8955	28.6791	22.2223	24.7968	18.3872	23.1969		8.57412	6.55669e-05	40.9925	22.0576	0.000422446
USP12	16.6567	16.3691	18.4792	18.2431	13.4116		25.5368	31.0024	29.2993	32.8679	33.8513	41.6619	53.4183		-6.75158	6.69622e-05	16.6319	35.3768	0.000436527
SLC25A3	167.468	183.353	222.885	159.438	202.498		80.0683	109.972	103.036	98.4302	127.996	65.1262	80.9667		6.53818	7.12567e-05	187.128	95.0851	0.000450609
PCDH7	116.074	146.198	85.9016	190.68	68.4334		17.1356	27.4674	24.0348	11.4229	34.4125	24.1983	6.82527		6.46797	7.25188e-05	121.457	20.7853	0.000464691
KIAA0101	8.17616	7.54462	11.3993	7.45786	5.21259		28.3238	19.2519	14.3205	24.8509	23.1498	27.5866	40.1419		-6.56306	7.99734e-05	7.95811	25.3751	0.000478772
LDHD	13.212	9.76239	24.9861	12.0043	14.8471		2.06306	1.05379	2.55984	1.82676	4.62118	1.53238	0.437163		6.73044	8.36951e-05	14.9624	2.01345	0.000492854
DNAJC9	18.8031	12.7512	16.1672	11.7653	13.9991		39.1029	30.8881	25.2292	44.8475	24.8679	36.3156	56.5376		-6.32073	9.04267e-05	14.6972	36.827	0.000506935
CDK16	43.4638	47.6279	48.4651	47.0554	48.328		71.6236	52.5648	71.36	73.3963	67.6742	72.8121	62.6719		-7.16238	9.08152e-05	46.988	67.4433	0.000521017
ATP6V0D1	103.87	111.81	107.818	146.122	131.785		59.8506	59.5635	70.9046	65.1177	78.1975	63.0067	58.5336		7.99282	9.41897e-05	120.281	65.0249	0.000535098
BHLHA15	12.7874	11.2763	19.0236	9.27146	13.7829		0.820997	1.07389	3.49303	2.39035	1.7754	4.98915	2.40344		6.86026	9.46313e-05	13.2283	2.42089	0.00054918
MYBL2	15.5643	12.8585	26.0318	10.7555	10.6697		70.0505	38.1985	60.2703	74.0178	49.9246	51.3934	110.615		-6.97888	9.55157e-05	15.176	64.9243	0.000563261
E2F1	7.92963	5.47408	11.7412	6.13025	5.93845		37.6348	25.8044	19.5014	23.1915	20.4909	25.3545	74.2729		-6.22286	9.90471e-05	7.44272	32.3215	0.000577343
ECHS1	188.048	168.314	134.572	146.156	172.384		48.6127	73.2666	96.8188	70.2476	69.4829	34.7722	66.3423		6.78608	0.000109339	161.895	65.649	0.000591424
GNG12	107.649	122.237	119.631	125.958	121.426		79.8204	54.5284	60.0554	84.6333	75.0589	76.4326	83.9014		7.08836	0.000109713	119.38	73.4901	0.000605506
SRA1	130.375	179.509	149.634	181.354	216.385		58.1428	121.132	79.4232	79.698	71.7429	49.7828	59.141		6.13122	0.000111503	171.451	74.1518	0.000619587
NPY	288.184	0.733046	1.20433	58.5641	2.43057		1e-06	1e-06	0.55258	1e-06	1e-06	1e-06	1e-06		6.30796	0.000114621	70.2232	0.0789409	0.000633669
CNKSR3	16.9945	14.8779	15.4252	12.862	11.0919		106.492	115.577	61.6861	51.3545	37.4148	79.9465	29.7079		-7.12064	0.000123162	14.2503	68.8827	0.00064775
MCM6	53.5857	38.6086	55.7535	37.5447	35.5767		146.563	73.0083	70.7367	107.944	99.7635	116.198	108.699		-6.15034	0.000123725	44.2138	103.273	0.000661832
PDGFB	18.5652	13.4797	11.0566	16.0399	8.32817		27.4226	43.0771	32.3249	59.6413	37.1665	49.2444	65.68		-6.46307	0.00012607	13.4939	44.9367	0.000675914
LYPLAL1	39.9201	29.9189	39.7773	32.3691	62.596		12.4467	10.0301	13.3645	11.5566	14.7486	11.3565	22.838		6.658	0.000129125	40.9163	13.763	0.000689995
ALDH7A1	111.873	69.7558	99.1586	65.9118	111.405		24.4178	39.3745	34.3135	42.6485	38.1611	24.2843	37.655		6.76492	0.000132369	91.6208	34.4078	0.000704077
BFAR	54.6475	58.5739	51.9552	50.8018	44.6932		78.3256	85.384	68.9756	79.9056	62.0458	79.4128	80.2334		-6.22544	0.000136048	52.1343	76.3261	0.000718158
ARFIP2	63.1238	42.6981	61.1374	57.1977	62.0719		22.1005	20.5912	30.2925	30.9585	33.1096	22.052	40.1835		5.9701	0.000139848	57.2458	28.4697	0.00073224
WWOX	30.6006	44.584	36.3109	28.3737	52.8135		11.3917	19.4932	12.2937	15.7793	18.7585	10.9215	13.1256		6.65918	0.000140252	38.5365	14.5376	0.000746321
FAM114A2	13.1338	12.5382	13.2359	12.0791	12.1923		19.8797	16.4315	17.8668	21.9819	16.4586	18.4996	24.1948		-7.15891	0.000148582	12.6359	19.3304	0.000760403
NDUFA9	91.3045	95.1844	108.228	90.1444	107.285		71.4758	47.2404	64.4376	74.7716	71.8823	61.4698	62.98		6.00307	0.000150361	98.4293	64.8939	0.000774484
NGRN	83.4367	79.3586	73.3201	77.4587	88.8642		68.4212	57.3353	61.1328	57.5063	59.8915	60.0154	63.2552		6.87205	0.000153015	80.4877	61.0797	0.000788566
CD164L2	29.2214	39.0863	18.6398	46.2276	25.8912		6.0838	11.0891	6.71009	4.35928	5.86035	1.61072	1.75858		6.1387	0.000155141	31.8133	5.35313	0.000802647
ARF3	248.245	216.013	164.386	224.89	212.147		160.314	114.58	92.4586	91.4131	139.282	117.936	100.003		5.84613	0.000163895	213.136	116.57	0.000816729
C11orf58	13.641	11.9481	12.4066	14.5868	15.3339		8.06664	7.97771	8.77421	7.12836	9.75403	10.2975	10.5426		5.82172	0.000168895	13.5833	8.93444	0.00083081
ELL2	91.562	49.7894	34.1187	98.1482	59.1323		6.08621	13.1424	12.6528	15.742	14.4217	9.41085	14.8614		7.07207	0.000170449	66.5501	12.331	0.000844892
LAP3	106.856	93.5044	113.128	115.917	99.011		70.8113	80.0274	54.611	65.4961	65.6609	65.5968	88.3654		5.85227	0.000179406	105.683	70.0813	0.000858974
COG7	60.1273	53.4606	59.3243	62.3285	58.9892		50.3971	40.5907	47.3949	47.3739	37.0125	40.8048	38.2911		6.07702	0.000179875	58.846	43.1236	0.000873055
ETFA	115.182	130.779	131.957	117.716	151.949		87.7711	48.126	83.8307	68.7962	78.315	73.8184	86.9529		5.92603	0.000184727	129.517	75.3729	0.000887137
LIF	5.3786	6.44534	4.68571	9.85366	4.96465		13.5068	14.7119	12.7449	22.7943	41.0043	21.7552	30.5565		-5.74754	0.000185909	6.26559	22.4391	0.000901218
SDR9C7	0.168687	5.52356	2.90823	2.68109	1.70873		1e-06	1e-06	1e-06	0.181496	1e-06	1e-06	1e-06		6.87492	0.000186645	2.59806	0.0259289	0.0009153
CHPF2	72.4047	75.5741	73.4009	96.4527	64.4769		37.5758	29.2401	38.4735	35.8235	58.3547	51.0832	33.4045		5.7753	0.000187993	76.4619	40.565	0.000929381
CENPM	3.05183	2.27517	2.08996	1.53703	1.5578		9.19306	6.35219	5.8219	6.87354	4.88674	4.31812	16.8411		-5.75926	0.000188896	2.10236	7.75524	0.000943463
PLK4	4.51847	2.73069	5.99718	3.60042	2.56057		12.5746	6.60886	14.7932	18.2458	15.0757	11.6121	16.4267		-6.22139	0.00019943	3.88147	13.6196	0.000957544
RPS6KB2	18.1571	20.6293	20.8283	19.3819	27.2463		8.06525	8.22377	14.6077	13.3775	11.042	7.30883	11.9633		5.73407	0.000214186	21.2486	10.6555	0.000971626
COG8	76.6681	80.2125	82.0391	60.5819	74.654		49.0879	44.4148	44.9611	45.4247	53.5273	44.0114	60.8231		6.02043	0.000216421	74.8311	48.8929	0.000985707
UBL7	83.4862	75.4785	76.9871	116.947	123.414		63.7336	39.6309	37.7497	27.2068	38.8624	47.1276	36.1721		5.80445	0.000228878	95.2626	41.4976	0.000999789
ABCC12	1.04982	1.82762	0.688944	4.29078	1.11408		1e-06	1e-06	0.118901	1e-06	1e-06	1e-06	1e-06		7.36812	0.000233636	1.79425	0.0169867	0.00101387
VPS11	56.686	52.8068	64.5296	52.7982	44.1717		29.2956	31.1576	39.8917	27.731	35.2309	29.9238	40.7147		5.75383	0.000236714	54.1985	33.4208	0.00102795
CDC45	2.6701	2.07257	2.04031	2.13886	2.11556		5.78017	7.1589	8.01667	14.6999	4.55223	4.24805	9.64182		-6.81555	0.000242514	2.20748	7.72825	0.00104203
SAV1	32.5701	30.2292	24.6237	22.1414	23.6202		54.8563	38.5932	47.6934	50.1826	40.5002	62.9542	40.5075		-5.77508	0.000243118	26.6369	47.8982	0.00105612
TMEM9B	108.023	114.44	122.191	140.361	125.956		74.072	75.3727	75.8338	82.4864	84.6136	82.0591	111.328		5.55509	0.000243176	122.194	83.6808	0.0010702
NUP88	61.6619	55.5957	67.5012	46.5636	62.6098		34.6285	27.9824	33.9025	34.9108	43.696	33.657	41.2217		5.89925	0.000243226	58.7864	35.7141	0.00108428
C13orf27	8.46755	9.57905	8.33593	7.56897	5.46101		25.1959	11.3015	23.6739	25.7125	13.7954	19.3464	33.7446		-5.6418	0.000248209	7.8825	21.8243	0.00109836
KLHL36	42.7557	45.63	46.4704	41.3017	45.6586		19.9855	24.7466	30.7688	23.4626	34.0058	23.488	31.3303		6.74736	0.000249509	44.3633	26.8268	0.00111244
KIAA1609	8.95986	10.1588	11.0871	11.8088	11.3403		3.7493	5.26711	6.9405	6.40897	4.54662	2.74476	4.67587		6.28411	0.000255557	10.671	4.90473	0.00112652
DSCC1	5.56746	4.58304	6.16122	2.43747	5.20326		16.614	13.4665	15	43.694	10.8651	15.2889	36.2548		-5.5145	0.000256638	4.79049	21.5976	0.0011406
ALDH1B1	2.91994	0.631562	20.3048	0.283531	1.11042		1e-06	1e-06	0.378388	1e-06	1e-06	1e-06	1e-06		6.31096	0.000258616	5.05005	0.0540563	0.00115469
PIP5K1B	54.7171	46.831	13.0409	67.6921	63.6784		1.70745	4.61364	11.6926	8.99647	1.79961	1.40779	0.777591		5.51018	0.000258951	49.1919	4.42788	0.00116877
DDX49	19.8682	21.5701	21.2748	19.7833	22.4706		29.3082	29.762	29.7079	36.1974	24.1821	26.4752	27.2458		-5.90863	0.000259255	20.9934	28.9827	0.00118285
PPAP2B	68.804	98.44	68.2747	111.049	86.2776		51.3582	42.7786	28.4629	29.0742	42.9824	51.0796	40.895		5.67874	0.000260649	86.5691	40.9473	0.00119693
TPRG1L	223.982	185.075	225.779	154.857	187.334		87.262	87.3515	112.785	121.923	158.2	89.8169	106.932		5.48854	0.000267313	195.405	109.181	0.00121101
DCK	4.70376	2.67283	9.40617	1.7296	3.5398		32.813	51.3789	9.22929	60.7527	22.4715	33.1481	53.3686		-5.7394	0.00028738	4.41043	37.5946	0.00122509
RNF114	44.67	42.9248	48.7923	41.939	42.5619		88.9365	84.4283	80.4319	51.5253	66.4976	73.5535	97.1331		-6.44844	0.000289315	44.1776	77.5009	0.00123917
SKA2	18.388	23.0811	18.8058	12.9585	21.7863		42.1582	25.1367	43.1986	37.535	40.3444	48.6057	63.7571		-5.48318	0.000289773	19.0039	42.9622	0.00125326
UBE2C	8.79946	9.23686	14.3735	10.1139	15.8305		32.5465	40.5747	28.5577	34.4253	27.9549	26.8018	25.5142		-7.35338	0.000293456	11.6708	30.9107	0.00126734
HMGB2	73.4966	84.5138	84.1186	67.6004	58.5925		155.74	167.896	174.89	145.025	97.8516	109.258	227.458		-5.53364	0.000298666	73.6644	154.017	0.00128142
KCTD14	27.7367	22.2311	20.335	17.3902	13.9059		2.92327	2.70854	7.91365	7.65734	9.08719	3.89278	8.10539		5.61944	0.000303078	20.3198	6.04117	0.0012955
C2orf56	7.64413	8.60978	9.26386	6.89043	6.53012		14.2068	12.3559	14.3109	19.5415	10.1622	15.571	22.734		-5.50759	0.000306553	7.78766	15.5546	0.00130958
MEF2A	35.3194	29.7417	35.1723	25.3493	31.8183		17.5664	16.0556	14.8962	20.5676	24.639	18.514	22.652		5.39299	0.000312732	31.4802	19.2701	0.00132366
FAM116B	16.1052	12.7302	13.5149	10.4604	14.4582		6.19519	6.73659	10.6786	5.0477	6.61104	3.82333	6.18041		5.54284	0.000313037	13.4538	6.46755	0.00133775
PDILT	1.58304	0.132454	0.0772257	1.00756	1.56856		1e-06	1e-06	1e-06	0.160125	1e-06	1e-06	1e-06		6.2129	0.000315026	0.873768	0.0228759	0.00135183
MAEA	77.9872	76.634	75.0675	71.972	79.9111		47.0112	42.3238	54.6285	40.7994	62.5276	45.9541	58.7555		6.59912	0.000315511	76.3144	50.2857	0.00136591
ITM2B	1907.62	1768.59	1595.47	1747.98	1972.83		1264.95	899.894	813.949	960.341	1495.11	1150.85	912.899		5.94613	0.000315709	1798.5	1071.14	0.00137999
CDKN2AIP	50.4529	49.1371	45.7637	44.8218	41.9326		34.0917	34.4252	31.6865	24.7733	37.1791	32.0704	24.1039		5.70156	0.00032586	46.4216	31.19	0.00139407
PER1	60.9798	72.7272	79.6223	57.2013	117.142		19.2436	45.4356	24.838	25.8531	32.7154	16.1699	38.1443		5.3719	0.000326085	77.5345	28.9143	0.00140815
HMGCL	90.684	84.3305	95.464	79.1444	116.456		36.3873	72.8909	49.5591	33.0891	47.3387	29.3896	50.1293		5.58909	0.000329838	93.2158	45.5406	0.00142223
GRIA3	10.7644	6.21061	4.06028	2.35592	6.87326		1.14285	0.950558	1.22181	1.12314	0.283697	1.08298	0.262648		5.42704	0.000331346	6.05289	0.866812	0.00143632
LONP2	166.774	140.215	107.291	88.114	104.134		38.0322	86.2611	43.3784	42.0523	64.3809	30.5789	34.7621		5.32004	0.000337841	121.306	48.4923	0.0014504
THTPA	97.119	89.9759	82.2766	76.4474	80.2807		52.4679	59.9593	51.6628	57.0316	66.2551	49.2353	35.2514		5.57243	0.00033956	85.2199	53.1233	0.00146448
CDC6	7.4642	4.30556	7.12328	3.60053	3.18212		15.165	16.693	13.3539	33.9954	15.424	11.3207	38.3744		-5.39751	0.000340617	5.13514	20.6181	0.00147856
LRP2	2.55703	3.16144	6.3547	2.00189	51.1957		0.0246168	0.0155656	0.531923	0.15768	0.285909	0.0427225	0.0164694		5.5024	0.000342925	13.0542	0.153555	0.00149264
PGAP2	65.1581	73.3471	70.2549	87.9912	72.514		45.3112	38.5645	31.2495	33.087	62.0112	36.4215	48.7059		5.59981	0.000346983	73.8531	42.193	0.00150672
LDLR	12.872	25.7954	18.8894	15.4664	16.5071		78.7237	119.748	43.5403	26.4473	137.159	101.167	134.458		-5.74539	0.000347719	17.9061	91.6062	0.00152081
RNF141	43.6678	33.9664	36.5939	31.1817	36.1548		23.1449	20.0434	17.9766	20.1618	24.5933	25.2931	30.4263		5.29143	0.000352088	36.3129	23.0913	0.00153489
REPS2	6.90603	4.00338	3.88698	5.29644	3.65991		1.56585	2.98733	2.06795	2.70921	1.38718	1.38801	1.45323		5.32955	0.000367004	4.75055	1.93697	0.00154897
NRARP	60.0962	54.0586	32.0525	30.5157	38.2439		183.966	101.728	100.013	353.555	75.7268	216.099	164.462		-5.31445	0.00037487	42.9934	170.793	0.00156305
TMEM159	21.9484	22.6392	23.6684	15.2008	18.7504		49.0509	74.7492	65.7802	32.3026	47.8679	31.5898	35.4516		-5.35471	0.000389572	20.4414	48.1132	0.00157713
DPAGT1	57.1764	53.2552	56.8522	52.5263	42.6544		24.3212	30.4074	32.1056	40.8711	32.3805	31.5214	42.1094		5.23019	0.000390904	52.4929	33.3881	0.00159121
C5orf32	137.195	196.78	206.089	249.323	188.4		53.8093	152.203	57.8569	38.8767	86.1601	50.0391	75.0755		5.41851	0.000405681	195.557	73.4315	0.0016053
NSDHL	19.5286	12.9977	18.7689	12.1411	13.5079		25.1631	43.795	29.199	31.2076	35.4123	27.6971	26.7966		-5.8354	0.000411008	15.3888	31.3244	0.00161938
ACO1	58.7291	52.2484	53.5284	45.3423	44.8101		18.9394	42.7348	24.3409	33.4177	28.6681	24.4118	24.8301		5.51913	0.000413142	50.9317	28.1918	0.00163346
CABLES2	9.43729	10.1728	10.0851	8.2787	7.6559		18.3955	18.0897	31.6832	20.2034	11.0894	17.6619	18.7741		-5.60602	0.000415176	9.12596	19.4139	0.00164754
RRM2	23.7528	17.669	37.932	21.2262	16.3589		72.3328	69.6453	35.9269	51.0748	84.8993	60.8843	109.062		-5.37402	0.000416843	23.3878	69.1179	0.00166162
FAM83D	7.22503	8.24089	8.47986	3.14864	5.62284		24.8464	21.9721	42.095	26.9398	17.4416	16.8898	23.3367		-6.21914	0.000416889	6.54345	24.7888	0.0016757
ACTR3B	13.2603	12.5984	14.6296	11.1519	16.8002		9.00834	8.63138	9.21918	7.56363	9.00205	8.81559	5.96263		5.47587	0.000418106	13.6881	8.31469	0.00168978
CDKN2D	10.3409	18.1883	13.8667	17.1324	12.9032		29.9073	40.3892	22.0463	27.7074	31.4159	28.6479	30.6665		-6.03572	0.000425777	14.4863	30.1115	0.00170386
EXOSC10	41.9014	39.5151	43.4752	45.6656	49.2274		32.6253	34.8349	27.9819	21.8046	33.1249	28.8258	32.9928		5.29881	0.000432377	43.9569	30.3129	0.00171795
FITM2	19.9274	14.8835	19.2852	13.7036	9.91757		41.4104	29.1611	49.043	49.4787	23.0736	42.6418	35.4996		-5.47906	0.00043497	15.5435	38.6155	0.00173203
VAMP3	55.6375	61.773	58.136	55.3977	57.8922		44.4988	38.0598	37.1359	36.1628	50.0782	43.1719	48.7077		5.84167	0.000439705	57.7673	42.545	0.00174611
RAI14	13.7692	21.839	17.9544	22.4448	12.5673		34.1735	39.9133	26.3624	44.0679	36.4733	52.8817	51.9548		-5.57897	0.000446083	17.7149	40.8324	0.00176019
TMEM185B	89.1343	87.5352	101.713	80.131	91.011		169.626	123.263	110.355	149.243	108.621	149.507	127.168		-5.25064	0.000471833	89.9049	133.969	0.00177427
MLYCD	70.7347	60.9029	64.5362	64.1084	69.3226		26.015	30.8284	44.0636	43.41	35.0824	27.1146	49.4524		6.16856	0.000472794	65.921	36.5666	0.00178835
USP2	12.3988	12.1751	10.6744	17.943	26.3459		6.36344	2.44116	5.4114	5.44119	4.71378	6.03647	1.79122		5.09894	0.000473474	15.9074	4.59981	0.00180244
WDR78	4.71539	6.37674	6.31397	6.21723	6.79902		3.27057	2.4922	3.06394	2.38383	5.23901	1.8425	2.56482		5.42206	0.000477344	6.08447	2.97955	0.00181652
DDX28	28.6961	31.9103	27.9063	26.1231	30.807		17.8947	22.6793	23.9039	23.8854	23.4118	18.2508	18.4749		5.10897	0.000497194	29.0886	21.2144	0.0018306
FOXA1	130.994	105.434	11.4574	117.011	70.8645		5.84886	1.7598	7.79157	1.81167	6.01962	3.21514	0.268798		5.16856	0.00050057	87.1522	3.81649	0.00184468
HMMR	3.38705	2.36979	3.1289	2.39411	1.69817		5.67835	4.10933	4.81931	7.6346	5.87942	5.43513	9.44783		-5.30981	0.000503245	2.5956	6.14342	0.00185876
MXD4	85.7788	55.3802	76.9192	44.9948	73.864		31.7516	26.9584	38.2925	15.1085	26.5166	37.675	25.1259		5.12652	0.000505188	67.3874	28.7755	0.00187284
OSCP1	57.0645	40.6405	38.6424	31.4249	34.8375		22.1361	16.3705	22.4307	18.6832	29.2258	15.8381	14.8175		5.23915	0.00051017	40.522	19.9288	0.00188693
NUCB2	141.866	151.363	139.928	239.475	163.54		88.1098	52.0552	75.6033	57.6529	91.2085	83.4821	119.039		5.06369	0.000514357	167.234	81.0215	0.00190101
STAC2	79.928	107.016	246.736	60.5784	206.033		3.1348	37.7361	14.2494	23.789	2.51769	1.71444	1.61843		5.29457	0.000520532	140.058	12.1085	0.00191509
SIK2	31.257	19.1964	24.4814	24.7158	19.7882		11.2572	10.8252	11.2702	11.4408	14.9632	14.3577	13.1967		6.32671	0.000529394	23.8878	12.473	0.00192917
RHBDL1	23.8836	18.4888	24.4349	14.6747	24.521		6.96417	6.51416	14.1938	5.22936	10.0288	5.75032	13.0684		5.0762	0.000531591	21.2006	8.82129	0.00194325
MED8	25.4926	30.3648	28.5042	23.7301	32.0901		14.2573	18.9422	21.8165	14.2184	14.0936	9.81564	17.8693		5.22693	0.000537142	28.0364	15.859	0.00195733
SSBP2	36.7455	41.8948	22.2036	33.2897	33.7294		19.2795	19.8534	17.2699	18.4491	15.1408	10.1766	11.8099		5.1712	0.000540365	33.5726	15.997	0.00197141
RAD51AP1	3.22268	2.67835	3.68382	3.09524	3.19919		9.85064	5.35089	4.08356	8.80219	7.42233	5.19837	6.244		-5.5247	0.000552977	3.17586	6.70743	0.0019855
TMEM45A	205.768	162.4	79.4041	265.518	201.453		12.7602	28.9266	45.0658	25.2646	25.5632	11.187	1.81001		5.30437	0.000556816	182.909	21.5111	0.00199958
MCM2	19.2027	10.4393	18.3291	8.88745	8.61191		61.1843	39.1117	36.6232	52.5918	33.7839	52.5474	52.1826		-6.73933	0.000559634	13.0941	46.8607	0.00201366
UBE2S	60.2502	61.6175	83.5329	46.5226	64.5619		98.9509	145.367	119.883	246.741	138.04	91.0597	153.741		-4.98452	0.000561538	63.297	141.969	0.00202774
INO80B	34.2146	42.0679	34.082	37.7077	51.2216		17.4196	29.8119	31.4621	19.0268	21.6031	17.781	18.9504		4.96319	0.000567372	39.8588	22.2936	0.00204182
DTL	5.3418	3.7151	6.36206	2.69696	3.17908		9.43442	11.6998	12.6607	26.3592	10.8714	7.33308	20.7508		-5.00653	0.000570031	4.259	14.1585	0.0020559
RNF128	65.7892	19.0274	23.602	64.8353	23.2184		10.4897	7.20714	5.30172	9.91615	2.06094	3.71539	1.31812		4.98077	0.000571495	39.2945	5.71559	0.00206998
KIAA1949	51.9707	57.8084	46.7987	55.6123	50.8422		64.8193	74.9228	81.3656	58.895	72.4016	72.6096	62.9646		-4.96097	0.000574209	52.6065	69.7112	0.00208407
UNC13C	3.34146	0.809855	3.97707	3.38196	0.420762		0.0222183	0.219753	0.166986	0.177415	0.0737111	0.0191882	0.0737232		5.29108	0.000579948	2.38622	0.107571	0.00209815
NLRX1	35.4112	32.7833	32.3746	21.5729	25.0509		11.9761	13.212	12.2776	13.8867	25.1586	16.3627	13.5062		5.00476	0.000580777	29.4386	15.1971	0.00211223
EFNB2	16.1504	26.7702	23.1157	18.6417	17.4486		63.5678	26.0909	35.587	77.3684	85.7399	75.8791	48.1796		-5.17255	0.000590157	20.4253	58.9161	0.00212631
SKA3	5.25162	5.39932	5.48649	3.30995	3.17198		10.0722	7.5756	9.51419	11.7788	10.5212	7.87822	17.1035		-5.25561	0.000592206	4.52387	10.6348	0.00214039
KIAA0319L	56.9418	38.8666	63.3844	49.6018	52.9144		25.5042	26.6574	31.301	25.0077	31.4117	30.0661	38.0612		5.66867	0.000592825	52.3418	29.7156	0.00215447
TPX2	14.6137	9.93498	15.6083	7.78254	6.71056		39.3862	25.8025	26.2931	33.5325	35.7443	37.1337	50.4565		-6.39718	0.000594509	10.93	35.4784	0.00216856
ASAP1	11.2709	15.5128	12.1967	14.583	12.5192		24.494	24.0066	14.6577	23.2274	33.4618	36.3669	28.7284		-5.2134	0.000605654	13.2165	26.4204	0.00218264
MCM3	24.6052	16.9922	21.1856	12.3322	12.5234		56.2587	62.9017	39.251	67.5525	36.7271	45.499	23.4463		-4.99354	0.000608563	17.5277	47.3766	0.00219672
HMGCS1	51.2334	31.7746	68.991	34.5176	27.8821		98.1017	87.6737	88.8003	139.568	159.962	134.554	221.141		-5.36702	0.000608826	42.8797	132.829	0.0022108
KBTBD2	46.482	34.7593	45.7126	32.5164	30.998		66.0505	57.8556	63.4854	68.6189	55.6039	68.8564	97.6099		-5.28151	0.000609446	38.0937	68.2972	0.00222488
MPHOSPH6	21.9754	18	18.8454	26.5497	27.0401		12.8171	9.63725	11.0841	16.4649	15.927	11.4864	11.1979		5.11966	0.000614516	22.4821	12.6592	0.00223896
TBC1D16	7.25485	5.91435	8.74916	6.01744	10.5558		0.69544	0.544318	5.47282	0.650283	0.586391	0.618961	0.174644		5.8881	0.000619629	7.69832	1.24898	0.00225304
NOD2	11.9049	5.16014	12.0024	12.7892	17.0271		2.02437	5.12707	2.09588	3.30592	5.38956	2.03246	1.59746		5.0633	0.000625373	11.7767	3.08182	0.00226713
LACTB	26.4343	32.0528	37.0639	31.8109	35.0757		20.6473	21.0985	19.7611	23.1013	23.6678	24.1658	19.4254		6.01783	0.000641036	32.4875	21.6953	0.00228121
B3GALT4	20.7278	16.9761	18.202	19.4786	21.4615		12.811	10.5006	13.0068	7.13413	14.1466	12.3104	12.8425		5.24257	0.000650532	19.3692	11.8217	0.00229529
FUZ	22.6777	20.0569	20.935	16.3381	22.5373		13.9049	12.0925	14.4068	12.436	15.6767	8.31129	9.26681		4.93206	0.000651757	20.509	12.2993	0.00230937
NOC2L	62.4237	59.3618	62.4997	49.9954	54.7934		28.8907	33.8642	40.374	43.3904	41.6948	29.4723	48.0512		5.02588	0.000690184	57.8148	37.9625	0.00232345
SLC44A2	110.587	112.306	83.5977	107.876	129.982		205.028	157.874	224.592	138.426	147.414	182.485	188.007		-4.96197	0.000698512	108.87	177.689	0.00233753
IL17RD	2.92133	1.84445	2.60789	2.93537	1.21988		4.51023	5.07157	6.56749	13.4446	5.192	6.36892	11.9901		-4.93405	0.000700502	2.30578	7.59213	0.00235162
C20orf94	6.25331	4.04767	6.05068	4.74245	4.54248		8.68488	8.28215	10.5803	7.12277	7.65474	10.6608	15.3771		-4.8163	0.000709482	5.12732	9.76611	0.0023657
AMBRA1	42.8606	26.8255	30.2901	25.7639	33.357		13.9531	19.0091	13.7481	13.9841	20.0359	17.2684	23.5845		5.01405	0.000726245	31.8194	17.369	0.00237978
IGHMBP2	32.522	21.8957	24.4647	19.4956	21.1825		10.264	12.6376	12.6351	13.2666	13.7049	11.4578	19.0206		5.12454	0.000726485	23.9121	13.2838	0.00239386
TMEM79	61.7697	47.1015	61.0328	61.5875	47.0539		22.1506	54.4953	15.2274	21.6807	19.5103	16.9271	19.6023		5.34342	0.000729158	55.7091	24.2277	0.00240794
HINT2	67.4173	56.2404	43.0619	43.1235	84.8314		19.0032	40.5541	18.6645	14.6163	33.3281	17.5432	10.971		4.80231	0.000730558	58.9349	22.0972	0.00242202
MELK	4.64126	4.36922	7.13517	3.66142	4.83218		10.4656	11.3516	7.34936	8.76093	10.7986	7.7491	16.1378		-4.9432	0.000737486	4.92785	10.3733	0.00243611
CYB561	273.858	218.721	218.53	337.694	265.466		186.928	167.239	101.796	136.727	114.543	174.36	164.26		4.81873	0.000738997	262.854	149.408	0.00245019
DAPK3	48.0965	46.4132	45.7642	48.5949	58.1481		76.6604	57.2378	98.7938	64.2411	67.1827	91.1043	86.9635		-4.98358	0.000739014	49.4034	77.4548	0.00246427
PNPLA8	102.961	88.5798	96.2142	140.468	109.099		36.338	51.4244	49.654	75.7264	63.7113	40.6897	79.4905		4.83075	0.000739351	107.464	56.7192	0.00247835
TMEM59	391.362	411.827	304.145	592.741	382.088		180.284	201.253	161.919	146.874	258.904	159.643	308.069		4.89142	0.000745593	416.433	202.421	0.00249243
SLC26A4	52.6522	82.7132	452.543	231.892	19.0565		1.66062	5.62087	9.34054	4.93835	1.98208	1.22822	0.545499		5.47533	0.000757338	167.771	3.6166	0.00250651
ACPP	38.3845	23.5388	36.7196	16.4874	65.112		4.20337	8.08121	6.86557	16.6459	7.84114	3.25116	1.5422		4.76834	0.000759221	36.0485	6.91865	0.00252059
RANBP17	4.72712	4.96194	6.75381	5.61088	5.2379		10.321	10.8256	6.18443	9.18395	7.30823	12.4817	11.4407		-4.85009	0.000762672	5.45833	9.67794	0.00253468
USP5	58.9154	47.7621	57.2533	47.6577	50.587		43.6595	29.6286	35.1783	34.7237	42.2246	42.1927	37.379		4.76441	0.000767302	52.4351	37.8552	0.00254876
PQLC1	36.235	38.2505	34.4959	27.4329	36.3431		69.9158	69.3457	38.4593	45.219	60.2907	64.6574	55.913		-4.81054	0.000770548	34.5515	57.6858	0.00256284
GPR19	4.13694	2.81755	5.18118	2.50031	3.48864		11.8709	5.01258	10.2464	11.2912	5.56832	8.50412	10.1441		-4.82232	0.000787205	3.62492	8.94823	0.00257692
DHRS3	160.511	113.84	175.397	257.548	146.26		52.4156	142.186	32.0111	75.8311	41.8849	44.0123	48.612		4.76634	0.000792079	170.711	62.4219	0.002591
EBNA1BP2	132.842	129.466	103.176	102.97	168.508		73.6774	45.8238	54.9517	66.1467	109.94	60.0308	47.3328		4.73288	0.000800861	127.392	65.4147	0.00260508
PTPRA	59.8501	56.9062	62.6374	54.2827	63.7		104.982	80.6434	101.884	82.9787	65.9521	102.372	76.4244		-5.175	0.000805792	59.4753	87.8909	0.00261917
REEP5	300.553	306.354	338.173	263.545	303.32		245.696	163.14	195.176	178.049	235.999	241.385	232.925		4.82459	0.000807955	302.389	213.196	0.00263325
CHD3	119.742	88.4092	99.9905	141.544	82.2521		48.4567	36.5362	65.7742	45.1093	80.0194	57.0293	52.0509		4.81262	0.000822811	106.388	54.9966	0.00264733
FBXO2	16.1845	21.3144	11.4577	11.6896	105.771		0.250301	5.92339	0.875461	2.39381	3.96459	0.349662	0.814473		4.73132	0.000825983	33.2834	2.08167	0.00266141
UCK1	37.0554	35.9203	29.2834	28.1767	40.8405		70.4004	55.8051	58.9735	48.1983	40.6294	55.2177	54.8069		-4.88377	0.00083163	34.2553	54.8616	0.00267549
CLSTN2	16.6447	73.1971	12.5012	16.5665	9.98916		3.58528	2.71672	2.68388	0.726065	1.35807	5.80744	0.741918		4.92948	0.000845661	25.7797	2.51705	0.00268957
POT1	16.5552	16.3159	14.9463	14.1344	11.3696		20.387	23.5543	23.1384	25.4347	17.3109	22.228	30.4043		-4.78986	0.000846474	14.6643	23.2082	0.00270365
ADRBK2	32.1021	18.6656	35.0199	45.4118	15.6736		6.6569	13.2119	7.36594	4.14087	4.90165	7.18237	13.3359		4.95324	0.000848864	29.3746	8.11365	0.00271774
ZNF259	24.6214	26.9496	28.2994	26.0637	23.1243		13.5194	16.3462	20.0093	17.2372	23.4819	13.7205	16.631		5.0621	0.000851585	25.8117	17.2779	0.00273182
SLC4A11	3.78433	4.84921	7.69692	4.43604	4.8291		15.1496	15.0294	15.2672	6.73141	9.41662	16.4879	32.5062		-4.78098	0.000856722	5.11912	15.7983	0.0027459
RBL1	11.0723	9.39486	13.2147	10.0421	6.35626		26.3909	20.1349	20.0669	25.5796	16.8697	26.5693	17.6403		-5.60909	0.000879906	10.016	21.8931	0.00275998
VCP	349.111	301.949	362.991	377.754	341.657		223.693	296.894	168.388	223.937	285.171	234.366	202.858		4.93748	0.000888847	346.692	233.615	0.00277406
RPL27A	5.16772	4.64438	5.28979	3.2395	5.87026		3.37684	2.11363	2.76293	2.01791	2.01257	2.63737	2.63491		5.19161	0.000908146	4.84233	2.50802	0.00278814
TMCO4	16.1435	15.7909	21.5245	25.6098	28.7429		6.84961	12.5995	10.8399	8.49846	9.60936	4.61906	12.8927		4.65052	0.000916521	21.5623	9.41551	0.00280223
HSDL2	52.1765	48.2758	42.2601	48.0575	51.3993		30.2425	44.8757	27.4923	34.0287	30.6631	28.219	21.7005		5.06842	0.000919349	48.4338	31.0317	0.00281631
QDPR	48.2279	48.8428	51.134	55.9063	45.5079		17.6086	31.02	33.7686	23.1566	33.1774	16.3671	31.1543		5.47824	0.000923147	49.9238	26.6075	0.00283039
ECT2	8.08722	7.06964	13.6985	4.29145	4.52294		23.987	18.6986	15.6721	33.6614	26.9817	24.9633	55.1051		-5.12409	0.000940542	7.53395	28.4385	0.00284447
GLA	26.6128	28.8167	22.6573	32.3801	26.8579		24.7825	18.5122	17.8989	16.8014	17.6884	17.4216	12.7515		4.62713	0.000942231	27.465	17.9795	0.00285855
ENPP3	0.758261	8.04706	4.97243	10.821	6.01126		0.223627	0.526666	0.479135	0.0575942	0.293361	0.42911	0.0936538		5.22422	0.000945285	6.122	0.30045	0.00287263
SPRY1	79.4476	96.6606	110.505	78.0953	124.917		312.791	123.409	219.54	203.499	234.743	288.205	133.405		-4.6646	0.000958748	97.9251	216.513	0.00288671
HSD11B1	37.8999	61.1649	29.8138	80.2053	136.32		11.6367	10.8187	12.1074	7.20022	23.1294	9.85596	5.84023		5.47162	0.00097645	69.0808	11.5127	0.0029008
MRI1	37.9517	69.4047	75.4889	73.0032	79.2557		20.6445	36.1465	28.6174	42.9705	32.1549	18.1231	18.5888		4.7103	0.00098036	67.0208	28.178	0.00291488
C15orf23	3.5129	4.71231	6.08662	2.97236	3.82014		17.3299	6.35549	6.68276	8.62266	11.0558	8.4715	11.1038		-4.63479	0.000987128	4.22087	9.94599	0.00292896
HEATR4	1.22261	1.11086	1.85226	1.45185	2.35253		0.575494	0.402913	0.760634	0.577343	0.210795	0.399699	0.102282		4.84598	0.000990227	1.59802	0.432737	0.00294304
LRRC42	50.1898	47.9734	30.5227	42.2598	38.5547		23.4765	23.5649	22.0824	22.1842	36.7841	20.355	17.6645		4.68178	0.00100387	41.9001	23.7302	0.00295712
ATG10	17.0289	14.1785	16.4603	15.0012	12.6239		2.22836	8.0262	5.62159	3.83482	8.74966	2.64554	6.24565		5.4799	0.00100746	15.0586	5.33597	0.0029712
CMTM8	47.3073	43.0852	35.7956	100.755	77.5113		6.8902	26.6137	9.22839	22.6595	24.1878	3.9234	8.48649		4.61861	0.00101365	60.8909	14.5699	0.00298528
COBLL1	112.318	76.4017	123.844	87.363	68.8207		29.6743	34.3841	27.7518	42.6961	72.7226	29.9945	60.3262		4.57956	0.0010162	93.7495	42.5071	0.00299937
FHL2	63.7919	56.9454	38.843	61.6219	46.556		284.412	87.6612	86.5514	111.166	168.504	255.266	296.714		-4.97067	0.00101902	53.5516	184.325	0.00301345
MYO1B	59.1462	50.1958	41.7593	77.2029	41.2858		14.4352	20.2853	23.9734	14.7126	48.5716	22.8681	14.8766		4.59397	0.00102656	53.918	22.8175	0.00302753
CHRM1	26.9425	19.2682	49.6923	25.2725	102.407		10.9857	0.934039	18.2957	2.29325	0.921665	3.86953	1.12565		4.64044	0.00102691	44.7165	5.48936	0.00304161
MXD3	4.9119	4.73456	6.79888	2.73799	3.99608		14.0852	12.3443	16.265	11.6212	9.03911	6.08696	13.026		-4.83287	0.00102778	4.63588	11.7811	0.00305569
POU4F1	1e-06	1e-06	1e-06	1e-06	1e-06		0.468902	1e-06	0.362961	0.146182	0.283777	1.48332	1.05827		-5.92624	0.00102911	1e-06	0.543345	0.00306977
FAM83F	20.0679	22.0264	40.7975	42.892	44.3676		10.5326	26.1347	6.22366	9.05139	8.30449	9.88913	10.2021		4.66641	0.00103211	34.0303	11.4769	0.00308386
ATAD2	18.0075	13.951	22.2183	9.51751	6.63233		64.4631	42.5323	32.7614	132.399	27.5798	59.9013	193.296		-4.5591	0.00104415	14.0653	78.9904	0.00309794
CENPA	4.08813	3.60296	7.6795	3.72724	4.58103		8.99709	10.4316	11.9344	16.2581	9.38218	6.55775	17.5586		-4.6708	0.00104911	4.73577	11.5885	0.00311202
CKAP2L	6.42473	5.35076	12.4311	4.97319	4.66014		17.9795	17.0665	13.6096	32.1259	16.627	15.4382	27.5518		-5.18392	0.00106912	6.76798	20.0569	0.0031261
PPME1	21.2738	21.2118	22.8654	27.0557	23.9835		11.8729	13.2496	18.6271	15.1158	21.2389	15.4424	13.7347		4.67423	0.00108356	23.278	15.6116	0.00314018
SLC26A7	34.2786	11.1997	43.0914	4.35372	13.0851		0.770158	8.6038	2.70258	0.444426	0.736137	0.474345	0.362803		4.56993	0.00108517	21.2017	2.01346	0.00315426
CDCA2	2.86005	2.49748	5.44459	2.85459	1.3605		10.8234	6.36217	7.73003	17.922	8.19185	10.3818	19.1169		-5.01593	0.00111541	3.00344	11.504	0.00316834
MAP2K1	57.3895	65.4738	57.8393	59.8891	61.521		45.6474	48.2655	37.0478	48.861	56.9055	43.2754	46.7797		4.82664	0.00112045	60.4225	46.6832	0.00318243
TMEM134	28.6048	37.4499	30.5527	24.8498	38.2685		11.0113	23.4883	13.8168	14.9621	26.176	11.7695	15.9244		4.57534	0.00112488	31.9451	16.7355	0.00319651
C12orf26	11.1404	10.2831	8.6648	9.50973	7.52244		4.96575	4.8223	7.97244	4.85986	4.75121	5.73211	7.70882		4.50726	0.00113226	9.42409	5.83036	0.00321059
LRRC41	118.051	102.513	158.114	120.85	94.2999		61.4573	60.6835	67.1658	74.5378	80.4777	53.157	83.6084		5.01945	0.00114707	118.766	68.7268	0.00322467
SSSCA1	65.9301	71.0523	61.8959	63.1646	110.052		27.7833	41.1089	40.351	26.8987	50.1386	25.6349	50.2272		4.53329	0.00116023	74.419	37.4489	0.00323875
ANLN	7.75733	9.15328	18.5481	9.19389	3.86177		40.0081	29.5627	27.7451	60.3206	52.5991	39.9472	65.4456		-5.74575	0.00117321	9.70287	45.0898	0.00325283
LCORL	18.762	14.2163	14.4934	19.6921	13.5637		7.39944	10.1619	11.2804	9.37233	13.2342	8.26242	9.96944		4.59458	0.00118256	16.1455	9.9543	0.00326692
SPAG7	79.868	79.889	62.1895	62.0459	96.0731		45.975	41.9792	56.9224	36.678	56.1925	32.6889	45.3893		4.60401	0.00119168	76.0131	45.1179	0.003281
IDUA	79.7382	54.4162	61.9759	69.5041	69.5171		19.9357	16.4576	29.2142	9.47787	34.5858	25.3185	44.8215		5.14113	0.00120579	67.0303	25.6873	0.00329508
DCLRE1B	25.577	24.3381	33.8425	19.0407	17.7887		54.7659	41.6259	44.0887	70.3058	32.6293	40.3757	77.4426		-4.50859	0.00121071	24.1174	51.6048	0.00330916
UNC45A	69.3007	66.2282	89.8308	58.7934	75.8357		35.6631	47.3442	41.424	44.5104	61.0782	39.7615	53.0433		4.55151	0.00121266	71.9978	46.1178	0.00332324
CHAF1A	11.4718	8.74577	15.5035	7.59274	8.21574		24.1662	23.1851	17.6208	34.137	18.7706	20.8516	20.1875		-5.18415	0.00122694	10.3059	22.7027	0.00333732
SEC14L1	120.768	125.421	239.524	166.396	115.831		79.6433	57.082	56.0413	95.8833	53.6773	79.4149	43.6047		4.81028	0.00123707	153.588	66.4781	0.00335141
ACD	10.8174	13.4828	11.1637	9.30083	11.1076		6.42759	8.60379	8.1929	6.56103	8.31118	4.30332	6.04509		4.52759	0.00123914	11.1745	6.9207	0.00336549
TMEM97	38.3453	26.3741	40.1738	30.1243	36.4323		50.6204	103.882	59.3429	102.69	57.1992	50.8156	125.962		-4.65088	0.00124301	34.29	78.6446	0.00337957
TONSL	2.94998	1.94753	3.56415	1.18309	1.61936		6.87683	7.43655	7.54747	20.6342	3.18073	5.99366	11.5428		-4.46637	0.00124423	2.25282	9.03032	0.00339365
SLC31A1	66.0862	54.349	79.2842	107.976	144.558		19.4252	48.1679	20.0721	28.3315	29.5557	27.4272	45.6654		4.79882	0.00124916	90.4507	31.235	0.00340773
MTBP	4.69603	5.53686	5.99039	3.13474	3.79358		12.3017	8.91526	12.2775	23.2044	5.32696	11.622	11.4939		-4.4599	0.00125774	4.63032	12.1631	0.00342181
MED17	45.9528	42.824	41.0254	37.0855	36.6877		22.7264	22.9178	34.5277	29.0328	35.6251	24.6124	29.1501		4.5409	0.00126551	40.7151	28.3703	0.00343589
GAK	50.6734	50.2845	56.1409	53.2434	46.1955		27.1713	27.2116	35.8227	24.672	39.8887	25.9354	45.5869		5.01427	0.00128854	51.3075	32.3269	0.00344998
DDX27	35.2832	36.4022	45.0014	28.2175	32.3141		59.8991	50.7979	74.7602	65.6958	39.7864	52.1042	67.3958		-4.45672	0.00129157	35.4437	58.6342	0.00346406
POLD1	10.2407	11.27	13.4398	7.33109	7.76993		20.6884	27.0886	19.0799	19.1244	15.333	17.3184	20.5087		-5.29086	0.00131208	10.0103	19.8773	0.00347814
UIMC1	9.9367	7.64466	8.56276	5.87837	8.90256		14.1252	15.1222	15.9449	15.3901	10.0209	12.9167	14.1016		-5.0107	0.00132723	8.18501	13.9459	0.00349222
LAMTOR1	93.6378	107.359	84.2278	107.862	131.419		66.577	60.9365	80.018	57.6115	68.7865	63.6488	60.9613		5.43935	0.0013295	104.901	65.5057	0.0035063
LRR1	8.05059	5.56016	7.09732	5.16222	3.58381		16.5716	16.3337	12.7491	16.892	12.0232	13.0279	14.8888		-6.26638	0.00134739	5.89082	14.6409	0.00352038
ZBTB4	47.5496	49.1805	47.6804	31.7314	34.1593		22.0191	25.7603	32.7781	17.7214	26.5585	23.9295	17.9359		4.56171	0.00134976	42.0602	23.8147	0.00353447
VTA1	30.9557	30.2798	25.6451	29.719	23.3971		36.2072	43.2792	30.8768	37.3121	41.8642	39.856	42.8215		-4.62605	0.001368	27.9993	38.8881	0.00354855
C15orf17	12.7745	16.9369	18.7552	13.0063	15.3097		7.01166	11.8137	10.2199	7.56523	11.6312	5.88244	9.11544		4.39034	0.00138513	15.3565	9.03422	0.00356263
ARHGAP1	152.319	102.429	85.4201	117.168	99.7864		51.6639	65.2184	44.7831	64.214	65.0212	56.6549	88.6391		4.59215	0.00140817	111.424	62.3135	0.00357671
ACAD8	81.8309	53.3826	57.695	44.8331	61.9307		30.1333	29.4306	28.0668	29.9564	36.919	28.2725	36.0682		5.91417	0.00141332	59.9345	31.2638	0.00359079
SDC1	244.926	343.824	378.39	311.399	271.073		1071.19	423.653	438.595	984.545	668.221	1444.28	708.729		-4.71309	0.00141847	309.922	819.888	0.00360487
CDC25B	4.52889	15.8853	10.2776	3.9069	8.79728		50.4712	34.5703	21.8382	22.967	77.4343	46.1813	24.6878		-4.8939	0.00141909	8.67919	39.7357	0.00361895
KIAA0141	45.3662	36.7485	45.5585	33.5726	50.5202		20.1215	33.4742	23.8183	15.9477	29.908	19.5995	29.9178		4.37571	0.00142106	42.3532	24.6839	0.00363304
MTHFR	18.9008	19.5021	25.4208	19.7029	14.6427		9.71834	17.4194	9.58153	9.02596	10.9427	9.06618	13.6286		4.38477	0.00142746	19.6339	11.3404	0.00364712
KPNA4	36.4583	33.0832	28.2457	33.1136	22.983		48.2507	46.4187	42.6836	56.8737	50.923	53.2107	101.526		-4.36392	0.00143725	30.7768	57.1266	0.0036612
TMEM25	28.3943	18.5911	31.4704	10.6779	18.6308		6.05299	6.80036	10.0173	5.83319	4.36012	2.58479	11.6482		4.41618	0.00144126	21.5529	6.75671	0.00367528
FBXL5	90.0099	97.4622	101.443	79.2468	83.6254		57.3648	52.8799	44.7437	53.5984	74.791	52.8308	28.182		4.78683	0.00145908	90.3575	52.0558	0.00368936
TCF19	10.8296	10.3276	10.6388	4.65087	10.3545		24.8068	35.4125	24.2334	28.9595	16.3307	19.9578	22.8177		-5.22302	0.00146722	9.36027	24.6455	0.00370344
CENPI	2.25305	1.60509	3.3829	1.97981	1.49062		4.39635	4.15607	4.97844	6.53176	4.41158	6.19118	5.55754		-5.69462	0.00147497	2.14229	5.1747	0.00371752
KNTC1	2.89452	2.32611	3.34774	1.30917	1.96214		6.97212	5.58743	6.63903	9.06688	5.10763	6.29734	5.80642		-5.86342	0.00147537	2.36794	6.49669	0.00373161
BCKDHB	64.9471	46.6945	69.6014	75.3572	102.934		24.7972	34.9737	40.483	40.3122	39.8253	19.5053	13.3282		4.32318	0.00151553	71.9068	30.4607	0.00374569
WDR24	46.9245	43.4688	62.0906	47.7745	54.3894		21.4238	29.762	39.8946	40.8702	30.4407	19.8706	30.5508		4.42642	0.00152615	50.9296	30.4018	0.00375977
DIAPH3	4.73104	3.46532	8.37212	2.12532	3.66518		15.5779	8.15537	10.2316	23.3351	15.7885	13.4041	26.1046		-4.79253	0.00153786	4.4718	16.0853	0.00377385
PANK4	13.5045	12.2856	17.4851	11.2538	10.1365		5.61443	8.07953	8.65281	6.73978	10.5337	6.26369	6.13672		4.439	0.00154326	12.9331	7.43152	0.00378793
CHST9	2.24746	1.90314	2.18036	1.52985	1.7049		9.53438	5.55143	30.2528	20.4957	2.74934	8.30243	25.5224		-5.18022	0.00155805	1.91314	14.6298	0.00380201
RAE1	32.0557	35.0268	41.1085	29.9414	27.7076		58.0316	42.8059	67.8623	59.7842	35.7536	50.974	56.0848		-4.29214	0.00158112	33.168	53.0423	0.00381609
TFAP2B	131.008	106.002	40.7396	158.289	60.657		20.1608	35.2322	12.9666	7.93141	31.4284	15.1374	2.19318		4.31532	0.00159585	99.3391	17.8643	0.00383018
TAF11	35.5637	31.8298	30.5667	25.7666	35.2612		59.6601	43.0387	50.8364	47.2307	33.9887	54.7775	71.149		-4.34171	0.00161224	31.7976	51.5259	0.00384426
JAG1	39.1019	37.4787	43.8882	32.8102	21.1474		90.9604	41.6107	256.143	173.598	121.003	110.493	68.4965		-4.42889	0.0016319	34.8853	123.186	0.00385834
SERBP1	149.637	150.575	155.306	122.872	144.335		95.31	90.5718	95.0292	109.932	135.354	82.3077	120.05		4.35257	0.00163359	144.545	104.079	0.00387242
POMT1	11.557	14.0895	12.4559	11.3459	11.3634		26.6639	16.4402	19.0811	15.6262	14.1804	22.2495	25.4674		-4.62578	0.00163555	12.1623	19.9584	0.0038865
SFMBT1	6.57457	5.37059	7.09246	5.85011	7.54443		7.71185	12.9908	10.443	13.6018	8.5134	8.52203	9.7304		-4.27908	0.00163566	6.48643	10.2162	0.00390058
TLE2	97.3454	52.4829	28.5513	58.9506	72.7215		21.5125	13.691	27.2075	2.24324	9.28772	15.4592	4.25762		4.3792	0.00164226	62.0103	13.3798	0.00391467
BLOC1S1	104.092	164.404	111.312	146.047	208.811		70.5026	107.507	71.2503	38.9572	71.0761	65.7695	60.495		4.42234	0.0016511	146.933	69.3654	0.00392875
KIAA0895L	11.2245	8.01013	12.9836	8.65231	12.8241		3.10813	3.08845	11.5216	2.84627	4.51467	3.13363	4.52392		4.44865	0.00166305	10.7389	4.67667	0.00394283
RTTN	3.06853	3.03507	4.19182	2.25558	2.05624		7.31134	5.41225	6.6478	5.78007	4.70907	7.67213	4.61868		-4.9907	0.00166615	2.92145	6.02162	0.00395691
AASS	1.21691	0.956715	1.69246	0.849833	1.58637		0.191665	0.674401	0.460047	0.304917	0.366469	0.329055	1.01752		4.30914	0.00169817	1.26046	0.477725	0.00397099
ATXN7L1	7.92076	12.9304	9.74945	9.63552	8.02974		5.00707	3.23359	4.30528	6.42229	4.11669	3.77388	8.87455		4.28386	0.00170986	9.65317	5.10476	0.00398507
HPX	724.673	487.213	36.657	5920.67	948.795		12.4683	20.3607	73.0672	0.278261	1.33083	7.88034	1.1378		4.38451	0.00171701	1623.6	16.6462	0.00399915
SPTLC3	13.9405	16.9528	28.1354	22.0478	7.70874		73.7097	125.58	29.8967	51.7273	40.0871	83.1448	48.5423		-4.46293	0.00173213	17.757	64.6697	0.00401324
NDRG2	70.0085	62.9247	185.758	83.7828	134.792		15.7207	36.1255	37.7174	42.3027	13.2348	13.3307	56.9872		4.24197	0.00173735	107.453	30.7741	0.00402732
HSD17B4	85.1435	63.4559	46.8442	55.3972	64.5179		32.3474	60.9303	25.7428	22.9966	32.0404	34.1673	27.9436		4.23228	0.00173828	63.0717	33.7383	0.0040414
TMEM175	37.4559	39.5767	47.3203	32.1328	49.6452		27.8566	23.2667	38.009	21.7529	20.8377	26.0559	18.5223		4.23532	0.00175661	41.2262	25.1859	0.00405548
DBF4	8.1091	9.86165	10.5072	4.19554	6.13668		20.6631	18.1808	19.6249	23.9031	12.3281	16.7868	29.4714		-4.91382	0.00177247	7.76203	20.1369	0.00406956
CCNA2	8.06148	6.96979	16.7118	6.26013	4.57129		27.2427	13.8567	26.4808	41.9849	30.6035	23.6948	31.9359		-4.96095	0.00177333	8.5149	27.9713	0.00408364
TUSC3	148.27	138.489	95.5353	183.5	137.893		77.3128	58.7072	71.9542	85.2917	112.882	77.3077	51.7805		4.33525	0.00181171	140.737	76.4623	0.00409773
DBF4B	1.86554	1.10731	2.00442	1.02578	1.28808		3.78076	3.01372	5.24159	2.39711	1.76978	4.08588	3.21176		-4.26731	0.00181175	1.45823	3.35723	0.00411181
BSND	8.20262	0.527409	18.3477	0.891115	1.7759		0.214399	1e-06	1e-06	1e-06	1e-06	0.160572	1e-06		4.84497	0.00183821	5.94895	0.053568	0.00412589
MACROD1	43.6432	47.6165	88.5505	53.3664	66.909		29.3012	37.9342	23.4449	16.8733	25.308	15.734	43.588		4.20324	0.00184515	60.0171	27.4548	0.00413997
FAM20A	44.4535	34.8079	16.7185	54.4268	83.0933		12.1238	9.89616	5.33778	18.0298	12.7412	9.16804	3.5769		4.48645	0.00184517	46.7	10.1248	0.00415405
CDK1	24.2445	16.6411	36.0703	10.2526	19.2248		51.9193	47.9766	51.9394	114.528	66.1975	44.818	96.8998		-4.72271	0.0018622	21.2867	67.7541	0.00416813
NET1	73.0338	146.849	102.664	85.0715	73.6068		45.6192	56.5665	40.6918	35.3065	53.7913	43.2034	34.6885		5.08495	0.00186622	96.245	44.2667	0.00418222
EIF2AK4	32.7512	19.3577	22.9973	20.3721	21.3275		15.1981	8.02883	13.6766	13.4042	15.4375	16.8779	10.2051		4.2098	0.00188032	23.3612	13.2612	0.0041963
PDGFC	179.478	126.08	134.988	85.6085	159.855		55.3513	57.494	55.4657	22.1515	99.1522	50.5094	70.8319		4.19616	0.00188064	137.202	58.708	0.00421038
MOGS	25.6762	30.2219	31.9962	36.6327	25.3757		64.9392	61.1569	37.0521	36.8746	42.3475	57.0665	77.6195		-4.26535	0.00188578	29.9805	53.8652	0.00422446
GRAMD3	41.2902	32.5693	30.6187	54.3349	27.4063		16.3749	20.6958	10.8647	16.3395	28.9082	17.4554	18.1835		4.306	0.00189488	37.2439	18.4031	0.00423854
ACADM	108.649	111.773	140.242	224.175	169.341		69.5896	55.3459	95.5111	81.8456	69.1094	58.6834	51.1106		4.83496	0.00190537	150.836	68.7422	0.00425262
SEPT7	126.651	137.241	108.171	113.999	115.487		142.969	159.118	140.94	131.285	166.838	165.913	179.042		-4.23259	0.00190949	120.31	155.158	0.0042667
PCDHB4	8.78796	8.98129	8.39928	12.1527	8.67227		5.6478	9.292	4.55701	3.22614	5.2191	5.13782	4.26724		4.3313	0.00191273	9.3987	5.3353	0.00428079
RDH11	29.4202	26.6408	33.4505	21.2832	24.0864		55.3026	61.9687	33.5271	30.3516	44.4118	56.3079	46.5816		-4.16888	0.00193707	26.9762	46.9216	0.00429487
CLMN	21.4155	13.51	18.8962	48.9578	33.721		6.14114	7.97385	5.23991	7.47783	7.43858	6.02759	4.01875		5.66918	0.00194804	27.3001	6.33109	0.00430895
STS	3.52668	8.23515	3.77594	7.61719	11.9743		2.75856	2.033	1.17821	0.915921	1.92342	1.52538	1.7844		4.92166	0.00195516	7.02585	1.73127	0.00432303
NFE2L2	269.388	265.501	172.285	355.25	219.486		106.455	112.802	127.887	113.509	162.903	105.986	176.148		4.70256	0.00198529	256.382	129.384	0.00433711
YIPF1	45.1213	61.7073	39.6996	74.1814	88.4434		21.8821	20.7956	23.523	22.79	29.2835	19.5489	27.0998		5.8462	0.00198986	61.8306	23.5604	0.00435119
TEC	2.25513	4.89395	6.42182	6.65063	2.25398		16.8224	25.7921	14.1166	27.7549	6.23244	14.1432	16.0404		-4.45572	0.00200596	4.4951	17.2717	0.00436528
SUOX	103.799	74.2912	61.0928	118.537	88.6656		46.7091	61.1556	65.758	36.2466	30.8886	43.7811	27.8085		4.17428	0.00200671	89.2771	44.6211	0.00437936
FASTK	61.3613	58.6191	81.3597	47.8963	82.8031		20.3427	33.8216	42.4378	29.838	57.5872	19.2865	22.5582		4.17547	0.00202774	66.4079	32.2674	0.00439344
UNC5D	6.00151	1.47453	0.823172	1.47153	1.10387		0.049653	0.89718	0.258093	0.119371	0.490991	0.0431024	0.033265		4.15698	0.00204422	2.17492	0.270236	0.00440752
RAB1B	181.813	197.011	178.008	181.362	212.87		122.931	116.487	103.41	109.312	148.199	116.482	193.457		4.51462	0.00205582	190.213	130.04	0.0044216
MCM5	27.1002	14.3555	25.9782	12.5661	18.7776		44.2531	63.4725	31.675	37.7225	37.3963	36.3951	86.9822		-4.26734	0.00206034	19.7555	48.271	0.00443568
BPHL	83.9097	70.2074	57.2278	71.7091	127.848		24.0814	13.5289	75.8581	30.3731	13.1252	12.8865	32.902		4.2887	0.00206664	82.1804	28.965	0.00444976
SMARCD2	106.766	48.6729	56.7914	59.1495	58.2274		27.5834	34.0112	28.116	25.2912	23.922	24.3416	28.0994		5.93185	0.00206789	65.9214	27.3378	0.00446385
TM2D2	38.6827	42.6782	41.1275	45.5338	40.7713		26.2831	19.0246	21.9583	21.1034	40.3117	21.8407	13.6368		4.90604	0.00209563	41.7587	23.4512	0.00447793
RAP2A	28.1392	33.5057	30.9987	28.5626	15.9539		36.5652	46.9753	45.2088	57.2653	72.9992	60.1862	93.6982		-4.23648	0.00210086	27.432	58.9855	0.00449201
PAQR4	14.2932	15.22	13.1829	12.5566	20.3241		28.066	21.7002	27.2516	19.8493	24.6559	21.1574	25.9167		-4.79409	0.00211065	15.1154	24.0853	0.00450609
SRPK1	14.8653	10.7719	19.7609	15.6552	10.6992		22.0782	25.6274	20.4224	39.7014	21.6793	29.5514	35.5419		-4.31542	0.00211375	14.3505	27.8003	0.00452017
SPC24	7.38303	15.5673	19.3301	8.51705	13.338		23.0014	39.401	30.7408	59.0654	36.3143	25.8083	27.2141		-4.61552	0.00214052	12.8271	34.5065	0.00453425
APIP	144.968	124.421	157.823	117.278	171.103		60.0681	78.5931	61.4649	85.7108	73.866	51.9048	147.658		4.26128	0.00214349	143.119	79.8951	0.00454833
CCNE2	4.39387	4.5861	5.42421	1.39509	2.79525		17.8376	18.9507	7.67093	11.426	8.854	12.9537	20.8477		-4.79487	0.00214631	3.7189	14.0772	0.00456242
TAF10	154.066	195.682	171.797	199.847	308.352		93.5317	135.544	134.377	89.5246	121.321	81.032	87.9822		4.53844	0.00215591	205.949	106.188	0.0045765
TLE4	16.5041	10.2295	13.7945	11.0966	11.389		22.1123	24.6428	21.6515	19.8705	21.5244	23.1919	12.7765		-4.182	0.00215822	12.6027	20.8243	0.00459058
FAM53A	4.17421	4.59349	5.14022	1.7173	3.58898		0.819967	2.02127	0.741229	1.0023	1.70871	0.446728	1.96852		4.10508	0.00216825	3.84284	1.2441	0.00460466
GPX3	3459.96	1959.16	230.522	5083.2	369.537		80.4398	55.0288	168.499	105.568	10.1969	48.301	4.96542		4.36026	0.00216992	2220.48	67.5713	0.00461874
PRKCZ	28.5595	33.784	30.5194	24.3981	32.1028		20.2794	10.0037	24.3832	10.4667	19.6786	14.7751	17.6478		4.41685	0.0021793	29.8728	16.7478	0.00463282
PEX16	34.27	42.0969	42.4051	34.5557	35.5139		26.648	28.8602	31.9769	23.6343	22.7054	19.5762	33.1172		4.13799	0.0021808	37.7683	26.6455	0.00464691
EIF2B1	26.8452	27.0108	27.9551	24.5486	26.045		42.1364	29.1931	33.1007	54.3232	34.9256	39.4854	39.0755		-4.71214	0.00219027	26.4809	38.8914	0.00466099
TUBB3	68.5932	115.387	27.5981	48.6864	112.304		2.49046	17.7893	15.733	6.45646	42.3903	4.2292	1.56357		4.17883	0.00220453	74.5137	12.9503	0.00467507
IMPDH1	41.1349	55.8569	57.3974	51.4959	49.7109		63.4296	70.226	76.6109	77.5596	61.0904	62.8743	83.5203		-4.3535	0.00220476	51.1192	70.7587	0.00468915
CCNF	4.76125	3.45417	8.14832	3.34688	2.00501		12.9886	10.9313	13.288	21.7291	13.2477	10.5097	23.0265		-5.05464	0.00220907	4.34313	15.103	0.00470323
CAMTA2	31.8041	25.3792	29.4761	23.1432	26.6192		18.0455	16.1951	24.9183	20.4439	22.4133	17.4708	18.4403		4.12154	0.00221396	27.2844	19.7039	0.00471731
BTF3L4	30.073	31.3949	31.6503	27.68	39.591		17.7018	18.0928	21.1665	20.0111	30.8629	13.6364	22.5131		4.15402	0.00222068	32.0778	20.5692	0.0047314
ACACB	1.46395	9.22228	14.2461	11.3136	28.6375		0.418255	0.502845	1.07598	0.641715	1.02388	0.762145	0.143848		4.99883	0.00223048	12.9767	0.652667	0.00474548
MICU1	25.3795	27.1869	28.5185	30.0182	28.0991		44.6087	33.6248	35.6931	33.5777	28.6099	39.1523	38.5049		-4.26782	0.00223821	27.8404	36.2531	0.00475956
PPAPDC1B	20.7698	17.4517	20.6449	27.8806	28.8696		11.9407	9.87845	9.77583	5.05455	14.7134	9.37092	18.7092		4.15477	0.00224121	23.1233	11.349	0.00477364
RFC3	14.5018	14.3966	14.5987	21.5183	13.3265		24.6471	31.1204	27.2403	39.6715	18.0336	20.0394	33.8809		-4.07037	0.00225245	15.6684	27.8047	0.00478772
NANS	114.639	130.678	139.795	180.134	157.149		68.5203	104.169	53.293	55.4956	126.259	78.8016	90.2901		4.13437	0.00225269	144.479	82.4041	0.0048018
TOE1	33.6977	36.9423	36.5796	36.3095	35.7685		15.2506	19.6698	30.655	26.84	24.6595	15.8139	23.6354		4.93334	0.00226835	35.8595	22.3606	0.00481588
MAP3K6	25.3275	23.5011	36.4568	19.1542	26.8057		6.38769	21.5015	15.7542	9.14026	11.4443	4.51441	8.95044		4.24991	0.00227368	26.2491	11.099	0.00482997
PDE7A	18.5323	16.7762	16.3893	22.2806	24.8009		11.0131	7.23905	14.7198	7.77686	3.23311	10.6392	5.10855		4.42306	0.00227659	19.7559	8.53281	0.00484405
ATMIN	71.6636	64.4896	55.2001	72.9582	65.7315		32.5515	38.164	50.0707	54.6176	49.5869	36.5448	55.0156		4.14681	0.00227963	66.0086	45.2216	0.00485813
SENP3	38.9744	43.4997	41.8191	33.8811	38.4246		24.73	30.0427	31.8486	33.5645	28.6684	24.1177	35.337		4.0646	0.002281	39.3198	29.7584	0.00487221
HIATL1	37.1428	39.1676	38.0247	36.7591	28.6077		60.725	63.822	36.5198	51.1714	46.3187	55.5129	51.6859		-4.05212	0.0023168	35.9404	52.2508	0.00488629
TMEM56	65.1285	55.8696	124.375	99.1068	83.0351		10.3399	14.2519	28.7286	99.0085	15.7067	12.9437	9.23802		4.33212	0.00232221	85.503	27.1739	0.00490037
LIG1	14.1112	14.9659	14.1603	11.3076	11.2944		22.733	22.9369	28.304	23.438	14.8038	15.659	18.0565		-4.08744	0.00234175	13.1679	20.8473	0.00491445
COMMD7	19.3909	20.2961	24.2904	17.3281	22.2588		39.054	21.4971	29.9704	35.5268	26.1797	34.6041	43.2475		-4.11073	0.00235423	20.7129	32.8685	0.00492854
PIGL	12.8442	13.367	12.1195	17.6458	12.2608		7.24319	4.07048	7.64231	3.1959	8.18386	10.336	3.38308		4.45568	0.00236466	13.6475	6.29355	0.00494262
FANCI	5.38528	3.96684	6.88735	3.43866	3.68091		8.49246	6.06466	8.80654	14.4146	9.06811	7.77664	13.0103		-4.19537	0.00239772	4.67181	9.6619	0.0049567
C11orf49	30.8471	21.4506	22.7004	24.1775	30.3038		17.8164	18.5371	19.5845	15.6123	19.6639	15.1332	13.9574		4.47695	0.0024015	25.8959	17.1864	0.00497078
RFC4	30.5707	34.1782	43.2797	26.2783	23.8092		76.834	53.6589	49.7355	101.337	35.7664	54.9627	89.2903		-4.03693	0.00240196	31.6232	65.9407	0.00498486
CHMP1A	75.2954	79.4002	76.7791	62.5171	64.2277		54.4861	51.1374	40.6551	40.236	52.7086	54.647	66.9779		4.04496	0.00240242	71.6439	51.5497	0.00499894
S1PR2	17.7867	22.7353	20.6939	36.7214	19.4272		48.486	34.9683	60.9853	49.6092	28.4538	48.1135	56.0728		-4.26075	0.00243984	23.4729	46.6698	0.00501302
PLK1	15.2259	16.1876	21.1644	9.22873	8.22781		27.4675	23.4976	42.5999	56.0986	39.2251	20.7171	51.1773		-4.22369	0.00244273	14.0069	37.2547	0.00502711
AGXT2L2	19.0608	17.9676	26.4245	15.8519	17.7119		11.5691	20.0504	9.68598	8.67285	9.02855	8.09603	11.0979		4.02608	0.00245011	19.4033	11.1715	0.00504119
CLPB	26.6373	21.8108	37.2885	26.1184	25.8889		12.2921	15.6738	17.4968	19.8465	20.2356	13.1433	20.2109		4.12763	0.00249443	27.5488	16.9856	0.00505527
KCNJ14	1.34802	0.670522	0.397625	0.372531	0.764216		2.95568	2.08594	13.0678	2.88593	1.64525	3.28222	1.16434		-4.00554	0.00249622	0.710583	3.86959	0.00506935
ZDHHC4	25.0778	32.1335	20.1702	27.0273	20.4543		44.0862	40.045	39.8267	53.9282	34.0603	35.1266	32.9807		-4.33672	0.00249675	24.9726	40.0077	0.00508343
CCDC149	21.1107	15.3285	9.35753	13.6093	10.8545		7.43938	4.29107	4.0701	1.96781	6.42807	8.94969	6.6199		4.01903	0.00249828	14.0521	5.68086	0.00509752
SGSM3	58.3219	47.5125	57.0176	70.3439	37.357		19.0239	37.2097	26.1187	13.874	28.838	17.7209	43.0106		4.03585	0.002502	54.1106	26.5423	0.0051116
RAD21	119.54	111.565	118.511	100.473	91.5399		251.821	247.62	128.502	369.967	128.98	239.657	308.302		-4.50749	0.00252276	108.326	239.264	0.00512568
RPL26	3.59912	6.39451	5.12035	5.58556	7.33013		2.71291	3.37803	2.44639	2.06295	1.03309	2.14882	4.19164		4.01194	0.00254795	5.60593	2.56769	0.00513976
DRP2	3.67152	1.384	0.899708	1.11585	2.06405		0.281664	0.576224	0.431422	0.297685	0.553827	0.279112	0.0347208		4.02506	0.00255182	1.82703	0.350665	0.00515384
CENPC1	25.3604	32.057	36.4207	22.0241	17.1734		54.9391	53.6679	33.9413	67.7028	40.836	52.5835	84.5835		-4.15983	0.0025529	26.6071	55.4649	0.00516792
ELMO3	26.6588	31.2851	43.9126	25.196	28.3459		14.8811	15.2751	16.4313	8.82316	26.46	9.45216	19.9601		4.03358	0.0025545	31.0797	15.8976	0.005182
CMTM4	17.4165	9.81733	17.3667	16.2326	12.0319		8.41591	8.52843	7.40773	4.63835	9.36329	9.15836	7.17902		4.23297	0.00256005	14.573	7.81301	0.00519608
DAGLA	31.8319	13.9477	13.206	8.41106	12.6032		3.57185	2.92282	4.7444	4.60437	3.90061	4.01575	6.48003		5.19849	0.00257969	16	4.31998	0.00521017
TAF15	66.442	69.737	72.1182	58.6332	61.6144		102.522	85.0127	77.7496	88.1408	67.4942	98.8863	109.997		-4.08148	0.0025833	65.709	89.9718	0.00522425
NCDN	28.771	27.1096	35.9874	24.2823	37.8828		13.9878	20.9743	20.5152	17.9441	16.1948	16.8756	27.7637		4.0387	0.00259399	30.8066	19.1794	0.00523833
PCNP	64.0192	68.9578	60.6184	64.6833	64.0148		52.126	50.1777	52.2614	48.7994	64.6915	47.2293	58.1119		4.19694	0.00259959	64.4587	53.3425	0.00525241
KAT5	36.0739	36.5597	34.6727	32.1579	37.7759		24.944	24.9583	29.6191	21.3763	25.5763	20.8035	35.0725		4.34504	0.00261292	35.448	26.05	0.00526649
CES1	3021.07	1233.69	104.436	1607.21	1297.79		38.6571	220.687	198.266	40.7624	18.1778	16.2263	14.7704		4.2867	0.00261549	1452.84	78.221	0.00528058
AGBL3	1.77753	2.17197	1.61983	1.74387	1.36333		0.844061	1.51892	0.352134	0.453475	0.945593	0.654715	0.333019		4.41903	0.00266291	1.73531	0.728845	0.00529466
SEMA3C	353.916	204.077	51.1292	193.641	154.074		7.14194	44.0491	28.4285	12.4623	107.113	10.3491	37.134		3.96995	0.00267741	191.367	35.2397	0.00530874
ESRRG	22.3198	6.72946	29.2927	10.1592	5.88626		2.98454	0.354667	2.43768	5.59499	1.54919	3.43813	0.624919		3.95595	0.00271792	14.8775	2.4263	0.00532282
NUDT3	122.18	110.695	92.1146	88.5209	110.907		156.763	135.298	130.192	174.987	112.699	160.173	178.869		-3.97912	0.00273167	104.883	149.854	0.0053369
KIFC1	18.6139	17.6225	29.3875	8.06338	11.1866		53.8636	63.4605	52.4021	57.6355	37.7315	40.5238	80.2338		-5.12438	0.00274379	16.9748	55.1215	0.00535098
LMF1	47.3386	45.0128	65.1676	46.4876	39.9294		40.4576	25.9403	35.5677	21.9359	30.1017	30.7662	33.4504		4.03269	0.00274452	48.7872	31.1743	0.00536506
CCDC150	1.3631	1.94329	1.39078	0.85178	1.14846		2.71713	3.10969	5.67701	2.84088	1.92044	1.99486	2.44266		-3.98558	0.0027591	1.33948	2.95752	0.00537915
TOX4	66.9015	72.0705	78.8925	79.7231	69.4732		45.7637	50.6214	55.1552	41.1597	67.6895	42.3561	65.276		4.20673	0.00277166	73.4122	52.5745	0.00539323
SYDE2	4.17738	5.70004	3.80455	5.17154	3.68304		7.97559	4.89866	8.33732	7.24965	6.1665	8.81012	12.2779		-3.94042	0.00277928	4.50731	7.95939	0.00540731
METTL22	25.8985	27.5737	24.3453	21.8657	34.3175		14.5879	23.6238	23.2018	13.181	13.803	13.5051	16.3795		3.93694	0.00279514	26.8001	16.8974	0.00542139
MPDU1	70.0844	76.7101	80.5013	76.1799	83.887		41.1685	32.4704	33.5507	28.0939	46.9489	39.5308	82.8926		4.62861	0.00280055	77.4725	43.5223	0.00543547
GBGT1	7.31437	10.4305	5.81152	11.3484	6.15374		25.5439	17.9678	12.2648	9.46981	15.813	19.9357	26.6877		-3.94846	0.00287361	8.21171	18.2404	0.00544955
CEP72	4.1695	5.75253	4.74375	3.38074	4.49551		8.17728	9.55231	5.05325	8.34754	6.07853	6.19082	10.4111		-3.91977	0.00288447	4.50841	7.68726	0.00546363
DLG5	15.6104	12.5789	22.4526	24.2543	8.60241		47.8075	24.0922	32.9345	28.4879	52.9842	67.1804	90.4817		-3.99383	0.00289271	16.6997	49.1383	0.00547772
TMEM55B	37.2183	47.2495	44.0124	45.8461	51.2494		31.5807	38.6123	26.3843	25.7585	22.2719	27.8801	41.993		3.99009	0.00290988	45.1151	30.6401	0.0054918
PLK1S1	47.855	44.4515	41.2533	41.7791	51.8432		56.2155	61.1145	58.1118	67.114	57.1082	57.2751	46.6701		-3.97464	0.00293669	45.4364	57.6585	0.00550588
NAP1L1	204.333	217.812	240.886	164.295	197.189		92.7955	126.708	186.845	116.761	149.161	88.8548	150.056		3.97772	0.00294027	204.903	130.169	0.00551996
FKBP2	95.1676	92.03	80.575	95.9132	140.015		44.427	55.4395	68.4033	52.6032	81.9253	42.7415	75.5257		3.93352	0.00294132	100.74	60.1522	0.00553404
PGBD5	26.8582	5.62088	1.52116	3.12969	5.19417		0.249079	0.489807	1.91076	0.178931	0.177867	0.468394	0.867136		4.28958	0.00294596	8.46482	0.620282	0.00554812
NEK2	9.37091	6.37841	17.3963	6.13458	5.28276		14.6537	29.478	29.0257	50.3443	23.7261	13.8201	29.1792		-4.14149	0.00295033	8.91259	27.1753	0.0055622
CAPN5	21.6531	34.4333	18.5949	44.1846	23.5964		11.3747	9.28321	13.6601	3.73713	10.8733	14.8597	15.5991		3.89578	0.00299731	28.4925	11.341	0.00557629
C17orf49	108.098	130.06	107.605	102.211	126.309		70.4051	79.4643	97.3994	75.2978	99.7719	54.678	87.9801		3.96841	0.00303059	114.857	80.7138	0.00559037
PDXDC1	58.3795	55.6339	63.4021	61.4149	53.7187		49.5744	56.071	36.6744	42.5886	43.019	49.2897	47.2674		3.98229	0.00303639	58.5098	46.3549	0.00560445
NMRAL1	71.3192	62.8515	84.109	34.5366	76.7928		148.128	135.861	153.924	231.332	109.496	112.057	146.585		-4.49012	0.00307706	65.9218	148.198	0.00561853
GSR	29.8134	35.9615	48.8504	67.6919	22.638		12.3472	13.1831	17.5657	15.5267	23.4302	9.85513	10.6916		4.48605	0.00308201	40.991	14.6571	0.00563261
CENPP	4.74272	7.79675	6.53445	3.4864	7.67047		15.2454	11.5675	10.9857	18.03	14.5653	8.59817	14.0403		-4.4679	0.00310009	6.04616	13.2903	0.00564669
TMEM101	42.1774	42.6584	47.108	35.4457	34.0791		88.1587	58.9737	66.7872	71.1481	37.6486	68.8391	91.3659		-4.01557	0.00310139	40.2937	68.9888	0.00566078
FIBP	84.7443	89.032	82.7667	92.2345	108.506		35.4343	52.2251	68.9143	64.9767	68.9416	37.438	69.1401		4.175	0.00310933	91.4567	56.7243	0.00567486
WDR55	46.1465	42.1133	49.714	48.7829	51.207		21.4707	36.0921	38.9958	28.663	32.8154	19.0965	35.7074		4.33548	0.00314307	47.5927	30.4058	0.00568894
CSAD	13.8648	7.36421	8.42653	37.752	12.94		3.08895	1.53172	7.52546	4.13027	1.81955	3.16935	2.69963		4.24925	0.00314883	16.0695	3.42356	0.00570302
WDR61	11.1715	12.7681	9.97471	15.5703	17.4936		9.38524	6.33529	7.68573	7.34723	8.34885	5.58179	9.9605		4.14203	0.00315737	13.3956	7.80638	0.0057171
LOC388630	21.9619	22.6471	27.5015	20.6937	43.3354		5.66237	11.2613	10.4973	13.8312	6.64458	7.92325	1.2847		4.12762	0.00316375	27.2279	8.15781	0.00573118
E2F2	0.620716	0.414356	2.56631	0.462197	0.47002		4.86812	9.79666	1.09061	3.18218	4.76418	3.17065	5.98403		-4.12417	0.00316906	0.90672	4.69378	0.00574527
ZBED5	67.0097	60.1055	64.9312	36.9205	49.5937		30.9495	33.9578	32.4411	24.3625	29.5712	27.3883	28.9108		5.19335	0.00317227	55.7121	29.6545	0.00575935
ANKRD42	11.1698	15.0264	13.329	10.1812	10.7371		9.22097	7.15592	6.30566	11.7823	7.31036	7.42327	7.07564		3.86856	0.00319137	12.0887	8.03916	0.00577343
C11orf54	33.5202	17.78	20.1994	16.9986	18.0703		6.86357	8.4704	11.4435	11.4555	18.7224	7.44551	11.1802		3.88745	0.00320156	21.3137	10.7973	0.00578751
SQLE	21.5773	39.7629	19.8615	57.9535	46.9647		379.003	249.746	23.336	149.671	199.637	443.063	325.871		-3.97282	0.00320841	37.224	252.904	0.00580159
ADK	116.247	99.4069	105.499	89.846	99.1458		55.1764	76.3519	70.1357	104.514	74.2123	61.399	71.5346		3.97661	0.00321109	102.029	73.332	0.00581567
CHAF1B	6.17578	8.72141	13.0953	7.12033	5.21388		15.2142	23.8686	15.7836	20.9084	14.5425	12.5695	22.3554		-4.47996	0.00321671	8.06534	17.8917	0.00582975
DHX38	20.5631	15.7593	18.1152	16.9195	17.0923		11.9093	10.2814	15.0524	10.5999	16.8606	13.8401	12.3708		3.8995	0.00322282	17.6899	12.9878	0.00584384
LLGL2	27.7626	45.2363	59.6862	56.9813	33.2847		152.081	133.298	49.1104	91.8408	73.8508	146.144	260.546		-3.8632	0.00322404	44.5902	129.553	0.00585792
SLC35A4	19.7032	22.523	22.6216	32.1487	33.9285		11.5014	22.2255	13.4428	19.9153	13.536	10.333	11.3792		3.87503	0.00326341	26.185	14.619	0.005872
ANKHD1	34.5497	50.0536	44.1591	35.3576	36.5851		22.8512	33.9665	24.8934	11.6262	22.4351	19.1399	27.7211		3.95833	0.0032662	40.141	23.2333	0.00588608
SLC2A6	3.43155	2.18673	1.6911	4.11702	1.68347		6.22799	5.77692	10.0208	4.74373	3.54967	7.13195	9.04937		-4.13148	0.00329199	2.62197	6.64292	0.00590016
NUDT8	28.8659	28.6285	34.4753	29.1469	27.9122		9.19062	21.5706	9.8364	6.27915	23.4324	9.51669	17.1086		4.52115	0.00331558	29.8058	13.8478	0.00591424
DAPK2	9.0098	6.56733	5.2487	3.28145	5.18751		0.554472	4.20083	1.48065	3.6343	0.971885	0.565885	1.47916		3.97486	0.00331917	5.85896	1.84103	0.00592832
RAPGEF4	5.95957	4.2351	4.74758	3.72111	6.05874		3.23828	2.66635	3.37423	1.99077	4.13534	3.07915	2.10703		3.85751	0.00332686	4.94442	2.94159	0.00594241
PGS1	49.5515	55.9973	74.407	61.5445	39.9463		102.48	91.3813	75.0997	110.981	79.7078	100.43	108.712		-4.54335	0.00332754	56.2893	95.5417	0.00595649
FANCD2	5.29232	4.75878	8.04679	3.01491	3.8449		11.1112	10.1456	11.4183	17.4332	9.09662	10.4186	10.8436		-4.77867	0.00335186	4.99154	11.4953	0.00597057
MTMR10	32.5179	26.8685	24.226	23.7679	29.7322		18.1471	13.761	14.3874	14.9827	21.2951	22.9605	23.9312		3.85344	0.00336793	27.4225	18.495	0.00598465
NIT2	27.514	21.3124	18.5407	13.3109	29.8165		9.95665	11.3459	10.59	11.4045	8.16511	7.30186	10.9752		4.83472	0.00336918	22.0989	9.96275	0.00599873
CCDC157	13.8504	7.72173	9.52743	7.35611	8.59688		3.83842	7.48588	6.83077	4.58952	5.81846	3.56188	3.64638		3.85207	0.00336974	9.41051	5.11019	0.00601281
MEX3D	34.6219	53.2928	49.9059	39.7959	36.3672		59.0627	114.695	71.5128	54.5908	60.5997	61.9682	72.298		-3.83455	0.00337366	42.7967	70.6753	0.0060269
ATG2A	15.4261	14.7735	21.7341	18.5716	13.1774		9.51125	11.2838	12.5736	11.7328	10.0356	8.81475	9.51344		4.51678	0.00338315	16.7365	10.495	0.00604098
ZZEF1	10.589	9.07245	13.0013	9.86801	7.93161		4.97565	6.12758	7.11323	6.083	7.5124	7.08509	7.31024		4.22876	0.00339438	10.0925	6.60103	0.00605506
LGI3	4.96769	3.6605	4.19896	4.92349	4.6066		2.25505	1.05003	1.47454	3.15425	3.65277	2.50382	1.36849		4.27899	0.00340891	4.47145	2.20842	0.00606914
CCNB3	0.988139	1.01851	1.40007	0.736939	0.806205		2.14377	1.67874	1.45901	2.31928	4.06632	1.34015	1.54264		-3.81688	0.00341298	0.989973	2.07856	0.00608322
CENPJ	6.51993	4.97075	7.61499	4.25627	3.87221		7.18309	14.252	9.20818	10.5101	8.95542	8.81564	13.7916		-4.10522	0.00341789	5.44683	10.388	0.0060973
ICA1	55.4047	52.837	41.0484	62.869	59.614		39.1326	23.2014	16.9446	23.169	20.5419	30.2205	53.3476		4.00999	0.00343974	54.3546	29.5082	0.00611139
METTL19	8.14894	6.15273	7.11511	4.98624	6.7279		4.60524	4.61078	3.93023	3.09956	5.60138	3.89229	4.59306		3.94962	0.003442	6.62618	4.33322	0.00612547
EPS8	70.6022	56.9674	70.2555	55.7536	39.4255		25.8623	30.5722	39.4517	34.0855	32.5528	30.1095	10.8916		3.85019	0.00344304	58.6008	29.0751	0.00613955
ELOVL4	2.12776	2.0634	1.16329	1.66876	4.93408		12.7541	17.7696	9.63049	105.312	5.39193	12.3057	3.95967		-3.88539	0.00351459	2.39146	23.8748	0.00615363
WBSCR27	22.321	22.2724	21.5326	19.5137	15.1669		6.35167	12.6635	7.69302	8.43734	13.8359	3.17383	12.4342		4.173	0.00351728	20.1613	9.22707	0.00616771
SIAE	36.4053	38.0556	21.8287	27.4418	30.5456		22.986	20.2951	11.0292	10.6336	24.3854	16.2325	10.785		3.80781	0.00353174	30.8554	16.621	0.00618179
EPHB4	52.9072	42.733	66.3557	31.1749	30.6581		101.418	97.0046	105.114	85.012	53.8752	102.311	110.574		-4.30167	0.00354103	44.7658	93.6155	0.00619587
NUMA1	198.268	147.621	163.095	140.146	145.602		93.2794	97.8882	103.107	54.9588	149.161	97.3355	100.077		3.90472	0.00354708	158.946	99.401	0.00620996
C6orf81	9.07755	7.30927	1.98968	9.97782	10.6559		1.39507	1.05442	3.23169	2.85216	1.3345	0.784053	0.722695		4.1215	0.0035846	7.80204	1.62494	0.00622404
NPLOC4	50.5486	48.5083	58.4666	53.6159	50.5087		55.3401	60.8577	63.0783	82.915	64.9406	62.8535	67.6647		-3.80982	0.00358841	52.3296	65.3786	0.00623812
ZMYND8	20.2129	15.0195	21.288	17.634	15.3443		49.7242	32.6994	23.3716	25.2538	26.7151	57.3542	25.4782		-3.94596	0.0035953	17.8997	34.3709	0.0062522
NDC80	5.14522	3.4121	5.57537	3.26119	2.11631		7.05327	11.6419	9.3921	12.3764	10.5347	6.26555	7.29479		-4.39968	0.00360447	3.90204	9.22267	0.00626628
RBM45	49.306	37.2371	52.9605	35.2915	40.4796		31.3582	30.0988	25.4268	21.5581	34.9781	28.7675	29.3135		4.05855	0.00361105	43.0549	28.7859	0.00628036
GTSE1	2.48031	2.99743	7.20164	2.13022	2.02899		10.8	9.8664	6.63929	7.62783	8.46173	8.47442	19.8029		-4.39044	0.00361547	3.36772	10.2389	0.00629445
TMEM128	52.7066	63.2646	55.9586	80.9232	70.0773		37.9741	41.7742	35.4049	29.2767	54.1996	43.767	53.6877		3.79128	0.00362666	64.5861	42.2977	0.00630853
VPS33B	12.6729	11.6226	12.6443	8.66708	10.0904		6.51238	6.11947	10.3829	7.2728	6.87274	4.59226	3.51161		3.89634	0.00362822	11.1395	6.46631	0.00632261
FBXO5	6.06172	6.13826	7.93604	4.04029	2.67718		12.5738	17.4232	11.3518	14.3239	12.5658	9.13948	19.224		-4.60575	0.00364279	5.3707	13.8003	0.00633669
SLC2A10	25.2008	26.374	21.2928	20.9277	24.9889		2.2562	6.68655	4.67721	8.4154	21.4391	4.6864	1.34514		4.52236	0.00364539	23.7568	7.07229	0.00635077
RHBDD1	28.2611	22.6858	14.0062	30.1309	17.44		58.6894	32.7104	38.5799	51.7708	29.406	55.1819	60.3344		-4.01428	0.00364623	22.5048	46.6675	0.00636485
ACSS3	20.5354	34.5832	36.4139	48.6275	25.9769		7.7089	26.2131	11.515	18.3903	20.209	9.25983	8.67781		3.77129	0.00365383	33.2274	14.5677	0.00637893
NOMO1	101.124	93.6788	122.805	132.706	83.6728		203.39	129.551	108.785	192.092	188.35	213.964	220.213		-3.77083	0.00365759	106.797	179.478	0.00639302
STK40	49.4864	55.1936	56.386	79.5879	53.1713		30.4805	35.6619	32.2324	40.2376	47.3368	37.9654	46.3089		4.00946	0.00367222	58.765	38.6034	0.0064071
HEPACAM2	342.396	52.2385	38.5731	115.611	5.55631		0.898771	6.27209	7.0028	1.82512	3.62177	0.576843	0.330676		4.19201	0.00367426	110.875	2.93258	0.00642118
SEPHS2	194.546	173.455	150.19	188.292	191.201		133.11	144.801	136.471	158.971	126.467	121.448	85.6209		3.81593	0.00370175	179.537	129.556	0.00643526
C4BPB	3.22847	26.2905	4.00597	44.4048	36.2042		1.58608	1.47179	2.28577	0.925332	0.230972	1.29505	0.186004		4.18192	0.00371487	22.8268	1.14014	0.00644934
STIM1	77.581	63.4865	75.1126	70.5484	63.9074		41.298	50.229	40.5136	36.6114	78.4677	40.7061	41.4589		4.05366	0.00373038	70.1272	47.0407	0.00646342
NUDT9	97.5995	95.3556	110.263	118.851	111.678		85.7492	77.7128	100.928	62.0586	72.8747	73.2172	49.8595		3.94712	0.00376405	106.749	74.6286	0.0064775
SPON1	114.503	145.43	108.98	296.764	322.413		7.94821	41.9688	59.5885	147.172	25.0223	18.0514	5.04879		3.90158	0.00376671	197.618	43.5429	0.00649159
EIF4EBP3	76.5095	71.1033	106.77	37.0429	117.175		17.2408	34.9607	34.8849	40.0356	24.8489	16.5541	34.3194		4.14546	0.00376892	81.7201	28.9778	0.00650567
CDK6	13.7264	5.75384	13.8398	7.37784	4.59471		23.3615	22.9363	17.7407	28.3105	16.8184	40.1186	129.863		-3.75198	0.00377875	9.05852	39.8784	0.00651975
ATN1	207.254	157.36	184.281	160.005	179.55		160.329	118.575	147.463	132.221	117.559	152.862	105.458		3.74912	0.00380074	177.69	133.495	0.00653383
ALAS1	198.96	231.341	338.01	263.816	135.236		77.3814	228.17	114.153	100.091	65.6188	80.0556	79.2705		3.77793	0.00380754	233.473	106.391	0.00654791
PPM1F	17.679	14.2517	9.73119	10.169	14.0148		21.8679	29.7406	24.9947	20.5662	21.7983	23.1574	19.3524		-4.63642	0.00383084	13.1691	23.0682	0.00656199
ACTN4	340.599	390.073	419.924	483.477	348.447		689.715	719.751	385.109	487.504	622.93	744.681	613.19		-3.75254	0.00387821	396.504	608.983	0.00657607
MRPL39	55.8355	61.4043	50.2281	43.3163	50.4456		77.183	125.593	68.585	115.603	57.1646	70.5539	101.879		-3.88903	0.00389664	52.246	88.0802	0.00659016
FAM181B	2.47195	6.17733	2.27238	4.17494	5.48658		1.15985	1.24669	1.42385	1.85671	0.921501	1.15077	2.27351		4.33675	0.00391897	4.11664	1.43327	0.00660424
DEPDC1	3.47842	1.8516	6.44702	1.88747	1.64016		6.33365	5.99622	12.7823	19.9717	8.98762	6.93471	11.8402		-4.17099	0.00394981	3.06093	10.4066	0.00661832
SAMD8	10.6029	6.01567	9.2976	11.905	7.28744		11.1125	15.342	14.5126	14.8125	18.399	17.6781	28.1566		-3.8512	0.00395121	9.02172	17.1448	0.0066324
TUBB	300.053	333.946	323.969	279.488	326.222		371.306	506.642	560.931	629.701	435.553	332.728	690.819		-4.16704	0.00396758	312.736	503.954	0.00664648
VKORC1L1	18.8054	11.3395	22.6971	13.67	10.5405		22.2427	41.3556	27.5787	44.0105	21.9142	33.7411	30.3458		-4.04715	0.00397462	15.4105	31.5984	0.00666057
OBFC2A	54.1838	39.7756	35.6851	83.9003	29.4314		14.4503	15.575	28.0869	15.7126	15.2933	16.8865	24.0605		4.4347	0.00397615	48.5952	18.5807	0.00667465
CHFR	18.5432	19.0997	13.547	19.4982	13.7221		25.2607	22.2126	34.199	47.3688	27.9533	30.1187	18.6226		-3.73507	0.00397942	16.882	29.3908	0.00668873
TMEM208	59.4405	49.6542	57.3292	44.4833	71.6981		36.8022	27.4096	44.9236	34.85	41.7163	32.2102	44.2716		3.87101	0.00399389	56.5211	37.4548	0.00670281
SMPD1	74.9046	85.97	117.56	148.601	83.9915		44.9228	32.8008	57.0806	34.6252	53.2791	48.6764	96.1585		3.73363	0.00400364	102.205	52.5062	0.00671689
TMCC2	7.28068	7.5882	4.82562	6.36992	5.54169		10.4458	13.7985	16.2723	9.70525	12.4733	9.75107	39.9918		-3.95573	0.00403728	6.32122	16.0626	0.00673097
PLA2G6	12.998	12.42	11.1388	8.93512	10.6242		7.15848	10.5799	8.33155	7.46433	4.62419	4.91073	6.71583		3.78649	0.00405774	11.2232	7.11214	0.00674505
NOS1AP	9.63819	6.73029	13.2192	6.15209	5.57173		2.75516	3.38403	6.23109	1.44122	0.720336	1.75949	3.9269		3.7939	0.00406432	8.2623	2.88832	0.00675914
CAV1	195.281	243.971	156.513	156.631	229.431		277.1	359.334	278.521	629.505	362.149	240.489	326.441		-3.70772	0.00406727	196.365	353.363	0.00677322
FNTA	113.749	117.545	105.54	87.2843	102.491		68.9917	93.4244	74.4029	70.3192	100.658	66.3368	57.1373		3.72996	0.00406989	105.322	75.8958	0.0067873
DNA2	1.67154	1.44903	3.04361	0.563229	0.628463		7.07248	3.76683	4.83856	9.39016	4.26369	6.04421	9.9627		-4.64949	0.00408916	1.47117	6.47695	0.00680138
REXO2	57.8816	64.9435	41.4791	71.188	55.5136		28.5295	35.8192	34.3659	41.4085	47.6863	25.9928	42.0499		3.80471	0.00409937	58.2012	36.5503	0.00681546
ATP2C2	9.12153	10.9151	15.6473	13.006	9.53305		4.25069	9.63812	5.84765	4.36313	6.4707	2.69625	8.33748		3.77555	0.00409971	11.6446	5.94343	0.00682954
RAB33B	26.3159	26.3567	29.6655	20.7007	15.2925		38.7118	33.5286	34.7537	43.33	47.6888	47.4182	49.5857		-4.469	0.00411477	23.6663	42.1453	0.00684362
SIRPA	39.2591	54.8837	36.9024	66.136	32.4507		167.075	82.158	59.224	65.4138	83.0977	205.878	180.293		-3.73073	0.0041247	45.9264	120.448	0.00685771
NUDCD2	23.672	17.7132	22.7928	13.8358	20.6607		25.064	28.5606	36.3035	56.4128	29.4033	30.0146	30.6702		-3.72948	0.00414401	19.7349	33.7756	0.00687179
RBM47	80.4839	50.863	87.3526	90.0102	31.3925		16.7751	16.8279	20.8415	13.9262	41.134	15.3616	49.7844		3.76244	0.00417064	68.0204	24.9501	0.00688587
FANCM	1.23861	0.605891	2.06816	0.745714	0.47048		2.53953	2.78213	3.53	6.38356	2.31495	2.53612	4.6226		-4.38109	0.00418746	1.02577	3.52984	0.00689995
MYBL1	3.16603	2.05216	2.34455	2.99546	3.95758		5.50926	8.75119	4.09259	3.67631	13.1365	5.77428	5.16608		-3.71365	0.00418748	2.90316	6.5866	0.00691403
MAPK8IP2	4.40528	4.50242	2.60318	2.90381	5.70067		1.93554	2.83457	3.00936	0.807524	0.954402	1.57846	1.02213		3.69902	0.00419331	4.02307	1.73457	0.00692811
PPM1D	20.7981	20.6149	24.9945	17.9165	15.8428		34.5396	29.9888	26.6845	27.2177	21.3963	30.9575	39.6542		-3.74232	0.00419913	20.0334	30.0627	0.00694219
HMBS	50.9728	38.0088	65.4872	36.1353	41.1122		21.7259	20.5742	28.7166	34.3395	28.3588	18.0087	34.6229		3.79573	0.00420892	46.3433	26.6209	0.00695628
MRPL17	108.786	96.5055	123.295	105.523	115.56		52.9519	66.2711	74.8723	80.7724	105.08	52.0643	86.7492		3.95887	0.00420945	109.934	74.1087	0.00697036
PSMG1	88.6951	96.4163	107.449	78.5536	103.302		128.727	152.89	122.769	178.859	101.585	112.095	163.557		-3.69911	0.00422417	94.8832	137.212	0.00698444
LSS	7.84208	12.2053	19.657	9.04609	10.5716		40.7339	93.4573	8.83069	26.4448	57.3535	56.1514	82.9547		-3.83863	0.00423347	11.8644	52.2752	0.00699852
HSPH1	24.1196	29.8825	22.2727	24.0191	18.0634		33.2772	79.741	40.9402	62.9232	32.7401	43.3794	130.854		-3.96379	0.00423702	23.6715	60.5507	0.0070126
SATB2	0.586068	0.593263	0.393983	0.571072	0.870981		1.35042	0.858871	1.10665	0.718922	1.86066	2.49205	3.13764		-3.75426	0.00423899	0.603073	1.64646	0.00702669
SPCS3	95.1111	116.383	76.6472	152.187	106.334		45.4093	60.0843	55.2981	53.8473	104.017	51.6415	64.2477		3.78852	0.004245	109.332	62.0779	0.00704077
FBXL20	12.3535	11.0486	12.9084	12.2301	10.041		27.6987	16.0197	17.1838	22.1143	11.0865	24.4541	23.9834		-4.02212	0.00425462	11.7163	20.3629	0.00705485
CPNE1	51.9031	54.4674	49.6914	47.1127	45.1179		70.455	75.1312	102.754	59.7334	58.7107	61.5153	60.8927		-3.92251	0.00429119	49.6585	69.8846	0.00706893
MCPH1	26.0828	21.3055	26.4809	19.7163	21.5027		17.8669	13.5276	11.7784	14.3977	23.4704	15.3737	15.7823		3.69121	0.00429603	23.0176	16.0281	0.00708301
PRKAR1A	271.713	246.987	280.376	281.659	275.951		178.319	239.852	165.243	259.63	216.565	191.339	222.886		3.98768	0.00434037	271.337	210.548	0.00709709
PSPC1	55.8669	55.4034	50.1745	41.8908	49.7822		44.7433	38.6665	45.9398	38.8425	31.8944	35.7102	36.3669		3.74483	0.00434282	50.6236	38.8805	0.00711117
GSS	32.9171	25.6486	28.6247	28.6251	35.2172		29.2374	20.5603	24.5736	17.7273	19.1315	21.7072	23.0555		3.67262	0.0043572	30.2065	22.2847	0.00712525
RERG	50.7937	52.65	11.416	32.2273	35.092		16.2956	4.16516	10.393	8.33844	10.4823	12.4821	3.17498		3.84206	0.00435946	36.4358	9.33308	0.00713934
PRKRIR	8.75164	9.61773	7.47346	9.09988	6.49978		6.6378	5.08008	6.69331	4.30901	6.31253	5.57049	5.98703		3.81118	0.00436462	8.2885	5.79861	0.00715342
MPV17	29.4717	30.5262	30.0728	39.6538	42.6214		23.9545	18.3394	23.0656	26.4034	18.4398	17.023	31.9103		3.67178	0.00438518	34.4692	22.7337	0.0071675
CST6	461.554	273.405	270.397	633.997	189.907		63.0945	7.09194	115.043	26.2501	166.931	75.0144	112.058		3.81025	0.00439357	365.852	80.7833	0.00718158
FAM54A	12.3688	12.6194	19.6524	5.98823	11.1482		28.4081	33.1627	24.039	35.5283	21.1872	24.663	46.3184		-4.33958	0.0043985	12.3554	30.4724	0.00719566
TNPO3	36.5622	36.1231	42.8157	35.0703	24.0565		53.886	55.3395	40.8158	59.591	46.9156	59.4291	71.9522		-3.94878	0.00442907	34.9256	55.4185	0.00720974
KIF15	4.22053	2.30369	6.51947	2.06938	2.48721		9.07134	8.5577	7.33963	9.81625	9.63306	8.37533	15.9615		-4.64346	0.0044371	3.52006	9.82212	0.00722383
MTERFD2	24.1299	26.8786	41.5281	20.5436	31.3528		58.2244	48.0589	45.6739	51.1617	37.68	67.7661	48.8948		-4.2073	0.00444555	28.8866	51.0657	0.00723791
RASSF8	63.526	29.2801	52.3091	34.0702	41.0746		5.97277	11.8693	11.1728	51.478	16.1731	12.9887	4.76229		3.84474	0.00445399	44.052	16.3453	0.00725199
NUDCD1	22.8795	23.6469	22.1125	18.5534	19.711		45.3588	57.0006	27.9498	109.56	26.0321	43.3791	64.1065		-4.19507	0.00445859	21.3807	53.341	0.00726607
KIAA1324	17.4396	27.7429	88.7859	227.485	58.9875		8.80869	21.1914	6.81254	8.21363	2.61416	3.77566	4.03243		4.20259	0.00446398	84.0882	7.92122	0.00728015
PICALM	108.839	82.008	98.5869	102.838	75.091		37.9035	55.9548	44.6132	54.1159	101.19	46.1919	63.59		3.73598	0.00446729	93.4726	57.6513	0.00729423
KAL1	66.012	18.6642	38.0975	14.8357	73.7525		4.43978	4.03878	13.9843	14.5258	10.0746	3.549	0.57293		3.65037	0.00449048	42.2724	7.31217	0.00730832
KIF2C	3.0752	5.19598	3.97691	2.42513	1.83726		6.99028	8.55227	4.89422	4.9705	10.0084	7.12077	19.836		-3.68869	0.00449945	3.3021	8.91035	0.0073224
UBXN11	5.65057	4.91725	2.95354	4.08803	4.72943		2.08636	3.29571	3.15056	1.27982	2.98327	1.81882	2.56942		3.64411	0.00451581	4.46776	2.45485	0.00733648
SPOP	36.8431	29.2859	29.9965	26.426	25.1201		53.7634	42.6543	30.8055	45.8942	33.4495	48.833	46.036		-3.6428	0.00453599	29.5343	43.0623	0.00735056
PACS2	46.9791	46.5852	50.2453	43.1653	52.9828		51.5829	62.809	66.629	65.8686	51.5241	57.5221	54.6393		-3.63795	0.00455753	47.9915	58.6536	0.00736464
COX4I1	458.969	530.779	668.091	453.674	630.082		355.021	318.254	370.758	513.266	387.088	242.694	345.059		3.65464	0.00456509	548.319	361.734	0.00737872
SPATA2L	23.5753	18.4102	25.2499	12.8588	16.3657		10.9346	10.5249	14.7028	7.95552	10.1006	7.92954	11.7972		4.01102	0.0045653	19.292	10.5636	0.0073928
NUDT18	44.5276	46.0307	53.8927	33.6431	47.8432		21.9933	19.7888	43.1826	34.2687	31.79	20.8039	17.7011		3.701	0.00457329	45.1875	27.0755	0.00740689
SERPINB6	136.436	183.83	194.962	153.297	216.082		95.7957	124.822	90.6378	64.3566	141.082	91.3453	151.708		3.64382	0.00458985	176.921	108.535	0.00742097
BIRC5	18.0775	15.195	39.1545	9.6652	13.4593		42.1639	40.6254	90.5769	75.5097	35.1666	39.2945	65.5735		-4.13142	0.00459314	19.1103	55.5586	0.00743505
LY6H	12.9732	2.24452	1.66266	3.11798	3.78881		1e-06	0.565503	1.86129	1e-06	1e-06	1e-06	1e-06		4.3139	0.00460274	4.75743	0.346685	0.00744913
GREM1	41.9554	17.8707	32.5778	13.5379	48.6699		6.52396	4.04073	10.6891	13.8023	7.26087	17.8779	4.80122		3.77922	0.0046035	30.9223	9.28515	0.00746321
RPL26L1	10.5286	18.3525	12.5051	10.4912	20.3608		37.9013	24.4511	28.3658	31.0731	17.3472	29.9439	26.12		-4.02695	0.00460519	14.4476	27.8861	0.00747729
FAM151B	75.3585	55.9458	83.3983	55.6273	58.3723		35.5101	31.424	42.6268	43.4377	58.0384	38.9344	51.295		3.69867	0.00463235	65.7404	43.0381	0.00749137
LY75-CD302	4.51343	5.58687	6.31505	7.4645	9.10148		2.71348	3.22854	5.46957	3.16029	5.11457	3.10354	2.13344		3.64793	0.00463837	6.59627	3.56049	0.00750546
KIF22	9.76157	8.48102	17.4589	4.09815	9.43878		23.4602	34.6372	28.6176	43.4003	24.7641	16.9502	29.7877		-4.41227	0.00464891	9.84768	28.8025	0.00751954
PGCP	221.527	132.888	53.4018	131.626	51.8853		39.265	25.0262	32.2841	17.8865	12.2394	20.6103	1.3167		3.66566	0.00464935	118.266	21.2326	0.00753362
VRK1	7.24185	6.63324	12.0581	5.72506	5.27784		15.4556	16.2339	11.329	22.9543	10.876	13.3067	12.1324		-3.97966	0.00465216	7.38722	14.6126	0.0075477
AUP1	86.6789	93.5867	97.55	113.176	101.723		152.402	200.718	164.486	157.388	90.5082	131.057	146.686		-3.81816	0.0046723	98.5429	149.035	0.00756178
NCAPH	9.87718	7.34864	13.0755	6.61387	4.4282		19.9182	18.3398	15.2506	21.1831	19.5734	16.0914	28.2082		-4.63221	0.00468231	8.26868	19.795	0.00757586
C20orf27	47.6077	43.7655	65.734	44.8885	66.2752		92.5846	98.0192	179.429	157.993	53.5463	86.9456	93.6527		-3.68839	0.00468867	53.6542	108.882	0.00758995
CHKB	21.9244	25.1221	28.4463	19.1047	29.851		16.4568	19.3049	18.5464	7.44038	15.6623	12.3453	14.4856		3.6499	0.00471077	24.8897	14.8917	0.00760403
GGT6	75.7799	132.671	108.585	196.76	86.8289		52.1886	34.1308	32.2572	25.9039	103.574	46.0674	65.5852		3.6339	0.00472931	120.125	51.3867	0.00761811
UBE2J2	59.192	76.4972	70.7025	54.7146	69.8271		33.4657	42.5552	57.5788	51.7086	51.3447	38.9875	53.5804		3.6127	0.00474863	66.1867	47.0316	0.00763219
IQGAP3	2.99013	2.96525	5.69336	1.96911	1.67797		5.58705	11.7364	7.34741	10.6942	9.8813	5.22306	5.99684		-4.1272	0.00475957	3.05916	8.06661	0.00764627
RETSAT	14.08	18.6486	17.1895	12.8149	16.3577		26.9293	53.8416	20.539	17.9837	26.1369	27.5322	39.7305		-3.80046	0.00477376	15.8181	30.3847	0.00766035
REEP6	51.9605	62.7215	25.8859	78.895	159.376		33.7887	6.5456	15.8299	21.8158	7.34338	19.9893	18.2415		3.83867	0.00478198	75.7678	17.6506	0.00767444
PPM1M	30.9634	45.7186	40.0187	43.4472	31.027		24.6097	32.0338	28.6378	13.8338	27.8332	17.9547	19.9543		3.6174	0.00479093	38.235	23.551	0.00768852
AP1B1	156.737	128.219	88.5023	115.882	75.186		39.309	93.1705	54.8405	74.486	61.4446	42.3038	50.7214		3.7118	0.00482353	112.905	59.468	0.0077026
CDKN1B	109.799	124.892	120.78	101.242	81.6484		97.4147	80.1423	71.1268	48.7692	49.1593	81.8773	57.6599		3.60781	0.00484326	107.672	69.4499	0.00771668
TTPAL	36.4971	22.2399	29.0551	20.2012	14.2518		49.8646	40.87	53.3743	38.7698	58.4106	69.5851	51.6552		-4.41762	0.00486431	24.449	51.7899	0.00773076
WDR19	15.2639	8.92088	9.50413	9.09367	9.16981		5.76144	5.22231	7.89663	6.33009	7.81417	6.31653	4.90346		3.94771	0.00487203	10.3905	6.32066	0.00774484
GRIK1	1.80829	0.278724	0.364109	0.832455	0.355094		1e-06	0.379627	0.117512	1e-06	1e-06	1e-06	1e-06		4.24639	0.00487279	0.727734	0.0710206	0.00775892
CAPN1	163.872	173.372	171.569	143.077	143.564		102.519	84.8612	96.2521	107.277	115.951	91.6429	177.919		3.80443	0.00491726	159.091	110.918	0.00777301
ILK	121.882	121.167	90.7874	81.9134	121.206		57.9189	66.8835	64.0667	49.4541	98.1325	67.7757	84.1907		3.62723	0.00492757	107.391	69.7746	0.00778709
RAD51	7.46491	6.32231	9.62841	2.97385	5.7016		18.6661	12.9753	11.5459	14.8472	13.1381	18.7568	22.1378		-4.43555	0.00493808	6.41822	16.0096	0.00780117
PRR11	1.18559	0.960887	2.40527	1.45685	1.35362		1.95685	3.46929	2.54218	7.2066	4.4478	1.94649	7.41656		-3.60271	0.00495497	1.47244	4.14082	0.00781525
UBTD2	33.4351	29.4619	35.7292	24.3715	21.7733		32.826	49.8	55.0801	48.0164	35.2432	46.6295	49.4871		-3.78813	0.00496107	28.9542	45.2975	0.00782933
APTX	17.1101	12.6786	15.9208	15.516	18.3636		7.86418	13.8278	15.3852	9.28834	9.94254	10.2491	10.3561		3.60144	0.00496343	15.9178	10.9876	0.00784341
ARAF	49.3418	57.3371	60.346	61.2082	56.0183		100.753	81.1991	80.66	99.2549	56.5202	82.2793	64.2696		-3.77321	0.00497464	56.8503	80.7052	0.0078575
BLVRA	28.9884	39.3248	26.843	27.3766	47.21		18.4376	20.0708	19.0772	27.0995	22.6069	15.3023	15.4793		3.92775	0.00497466	33.9486	19.7248	0.00787158
HIBCH	54.7701	51.4093	55.051	37.7098	65.5696		42.5528	24.5101	34.1432	31.6182	38.025	34.5732	34.6048		3.87176	0.00497557	52.902	34.2896	0.00788566
KRT73	0.244044	2.93848	0.675145	2.6389	0.622996		86.4987	4.92354	1.10138	4.96147	45.2848	54.1509	44.923		-3.58944	0.00497729	1.42391	34.5491	0.00789974
MAL2	35.035	47.4427	82.4767	82.6151	30.8744		105.194	211.909	58.1603	357.559	174.368	118.54	201.022		-3.60201	0.00498095	55.6888	175.25	0.00791382
OBFC1	52.9319	50.0213	49.1374	36.3069	54.4177		66.5443	69.5353	66.0765	77.6235	66.9459	52.5309	79.8237		-3.87511	0.00501223	48.563	68.44	0.0079279
ACOT8	60.8194	56.3079	54.5864	49.0284	77.7778		30.1625	54.415	35.7415	30.0076	42.1915	24.7179	48.2653		3.59236	0.00502278	59.704	37.9288	0.00794198
SEC22B	50.9776	51.1352	51.8313	53.3298	54.1125		82.6691	65.221	58.4023	80.4717	59.1188	77.2789	107.789		-4.22545	0.00505443	52.2773	75.8501	0.00795607
RAB15	58.4025	39.4521	106.036	59.7862	54.5315		33.7704	30.2315	27.6223	21.2444	10.7435	25.2878	47.395		3.58132	0.0051042	63.6417	28.0421	0.00797015
PRPS1L1	54.8937	45.3801	48.3945	42.9995	54.9241		34.3868	40.6363	33.2551	49.0389	30.4741	37.4133	26.0962		3.61433	0.00510517	49.3184	35.9001	0.00798423
SYT10	0.142638	1.03273	0.585063	0.976408	0.152177		1e-06	1e-06	0.430762	0.0770811	1e-06	1e-06	1e-06		4.15173	0.00512187	0.577803	0.0725497	0.00799831
BSPRY	153.788	133.44	165.834	122.327	160.725		92.006	75.7368	30.4562	15.791	53.5026	68.687	86.9465		4.08769	0.0051575	147.223	60.4466	0.00801239
BUB1	6.27934	3.57249	7.8132	5.89012	2.1829		16.0233	12.342	9.2776	20.1962	15.7107	12.0381	17.8571		-4.459	0.00516238	5.14761	14.7779	0.00802647
DHRS1	46.3339	38.3887	39.9395	27.4871	31.9043		26.1923	21.8339	30.9557	21.1361	17.5435	21.3324	10.2575		3.58716	0.00516385	36.8107	21.3216	0.00804055
DSCR3	16.7114	18.6844	26.8665	22.724	17.354		28.4776	35.6513	30.2022	24.6329	28.514	28.4682	45.6906		-3.69017	0.00516736	20.4681	31.6624	0.00805464
FAM82B	21.9918	21.2166	22.4354	19.5686	24.8291		15.9004	15.5698	22.4394	9.494	14.3374	13.3771	10.3595		3.90837	0.00516822	22.0083	14.4968	0.00806872
C14orf176	4.47198	6.17628	5.4829	3.45934	3.04751		1.54407	0.401962	2.4143	2.04552	1.82037	0.723508	0.183948		3.89571	0.00518019	4.5276	1.30481	0.0080828
FZD7	204.806	178.77	254.534	186.455	115.447		421.569	332.748	392.743	238.125	213.893	417.217	526.534		-3.62	0.00518728	188.002	363.261	0.00809688
FZD6	107.327	121.947	198.669	141.989	58.0319		465.652	430.538	94.6453	457.058	278.22	530.847	471.149		-3.5633	0.00519745	125.593	389.73	0.00811096
PEX14	34.4766	38.4074	33.3478	33.4755	44.857		31.4367	25.1816	34.5564	28.7152	26.5125	25.5904	21.4094		3.57934	0.00520154	36.9129	27.6289	0.00812504
MSRA	85.3971	120.302	188	109.986	251.927		52.1116	82.0583	40.5009	76.2369	32.3684	46.6425	83.5727		3.82167	0.00520593	151.122	59.0702	0.00813913
TATDN1	12.6625	15.3233	10.4688	9.93642	13.4086		21.94	18.7489	18.1506	39.9888	13.5689	19.7588	20.7077		-3.60137	0.00520636	12.3599	21.8377	0.00815321
SPAG5	3.39378	2.64546	7.74265	1.93992	1.88922		9.13016	8.28953	8.79956	10.7261	11.938	7.72593	20.5878		-4.3066	0.0052157	3.52221	11.0282	0.00816729
TMEM184A	7.52896	9.13875	10.314	13.5643	9.86701		19.9445	21.6491	15.5156	17.7059	15.5883	14.0144	10.3263		-3.60575	0.00523154	10.0826	16.392	0.00818137
GINS4	5.06797	6.27411	7.36162	3.92725	5.05471		10.687	8.37315	7.32437	19.1226	12.25	7.27718	8.28695		-3.55247	0.00524701	5.53713	10.4745	0.00819545
PPCS	50.6579	59.8844	52.3744	45.0866	48.0866		31.9825	25.5209	36.2701	30.2939	52.815	29.1361	42.4692		3.70553	0.00525188	51.218	35.4982	0.00820953
DHX40	44.1162	47.8601	41.8234	33.8684	39.2707		61.3566	67.9681	56.8946	50.0338	42.1277	59.7777	53.1801		-3.58525	0.00526852	41.3878	55.9055	0.00822362
CTSF	73.3462	84.4798	48.3581	85.1035	93.8729		40.0252	55.2999	37.2232	15.6849	41.2113	39.2356	50.8031		3.55549	0.00527257	77.0321	39.9262	0.0082377
ATPIF1	180.698	221.265	204.661	204.676	228.752		111.982	239.188	124.513	129.099	135.446	88.9338	103.462		3.90216	0.00535359	208.01	133.232	0.00825178
CSE1L	55.7443	41.6906	58.4917	35.6483	38.1722		67.6245	66.4811	88.5314	105.984	52.7891	64.7683	77.354		-3.65838	0.00537804	45.9494	74.7903	0.00826586
SGCB	34.9919	23.1785	34.7585	13.9063	18.6297		49.6961	45.785	37.3903	119.368	39.2879	65.7538	63.4312		-3.66892	0.005407	25.093	60.1018	0.00827994
TOX3	0.840711	1.47473	1.83742	3.72139	3.92637		1e-06	1.64487	0.419523	1e-06	1e-06	1e-06	1e-06		4.19039	0.0054232	2.36012	0.294914	0.00829402
VPS4A	68.8764	68.6906	92.2269	58.9597	76.5128		59.8622	55.3688	42.9066	49.4514	49.6551	46.6356	56.3809		4.00974	0.00544974	73.0533	51.4658	0.0083081
KCNT1	0.784606	0.952606	0.21321	1.58708	1.24154		0.0823867	0.0586696	0.886044	0.124622	0.189793	0.0333767	0.130176		3.53357	0.00547275	0.955808	0.21501	0.00832218
GATA3	274.46	220.112	80.562	131.282	64.5963		19.7536	107.432	41.9787	25.4865	53.8179	16.5368	6.398		3.52689	0.00547588	154.202	38.7719	0.00833627
LPIN1	3.32235	2.76609	3.35774	2.02867	4.82639		6.51566	7.29676	3.26386	5.04953	6.98493	8.8011	7.36978		-3.63108	0.00547875	3.26025	6.4688	0.00835035
TXNDC15	110.967	143.364	96.3217	115.534	98.3779		200.314	182.862	127.15	136.902	147.813	162.527	154.447		-3.66196	0.00547956	112.913	158.859	0.00836443
MYADM	279.964	372.32	151.683	274.364	284.003		716.572	457.674	348.367	315.221	896.882	983.324	722.726		-3.5278	0.00548451	272.467	634.395	0.00837851
SYNPO2	68.1181	22.1813	10.4465	31.2147	22.5488		8.439	9.20519	7.75701	3.71401	7.46493	10.5224	1.98754		3.75074	0.00553322	30.9019	7.01287	0.00839259
ARSG	6.88434	3.59599	2.50186	4.35984	6.75806		0.959482	0.159921	4.63226	1.34446	0.81302	0.569604	1.32122		3.67376	0.00555777	4.82002	1.4	0.00840668
TAF7	183.284	204.003	159.719	166.171	190.047		159.913	151.873	168.951	112.974	120.891	137.967	138.056		3.51689	0.00556823	180.645	141.518	0.00842076
CHRNA7	51.1006	29.8932	7.68016	36.2161	28.0067		4.71978	5.88167	11.5927	14.8702	3.36709	2.73811	4.85446		3.77798	0.00557015	30.5794	6.86057	0.00843484
SMAD9	3.48734	2.94528	2.78698	1.02393	2.15139		3.87352	6.42366	6.33153	10.577	8.56599	7.09979	3.65829		-3.84177	0.00557065	2.47898	6.64711	0.00844892
AACS	9.45265	9.26739	16.6315	9.40273	15.0524		19.3251	20.3154	12.293	22.9322	30.5421	22.6428	27.525		-3.63587	0.00557272	11.9613	22.2251	0.008463
KIAA0494	57.2482	54.1088	37.1292	63.4049	63.894		31.9691	33.4455	26.6531	16.9888	43.4998	36.0808	39.9195		3.51319	0.00560719	55.157	32.6509	0.00847708
PARD6A	11.3823	10.3763	10.9031	7.38995	5.69446		1.84694	5.6779	4.44338	2.93834	4.41038	1.68362	7.65036		3.56381	0.00563157	9.14922	4.09299	0.00849116
GLT8D1	62.794	52.6486	56.3508	40.0679	37.5493		86.6577	66.2343	88.12	81.7395	64.7599	86.8965	76.3129		-4.22005	0.00564208	49.8821	78.6744	0.00850524
ARHGEF40	32.5455	26.8485	25.7313	26.5582	29.9915		19.8359	25.6111	19.3405	12.102	20.0953	24.0429	15.3389		3.7189	0.00564726	28.335	19.4809	0.00851933
DPM1	35.0389	39.4832	31.3619	35.3471	39.3448		74.0647	54.1288	62.8957	50.5524	32.6623	50.5997	57.4452		-3.72626	0.00564797	36.1152	54.6213	0.00853341
AES	298.384	265.293	273.055	281.637	464.843		193.843	228.896	261.864	204.648	152.586	176.986	127.55		3.60694	0.00565371	316.642	192.339	0.00854749
NADKD1	10.6948	8.19646	11.5874	7.46712	6.84561		9.90711	15.4594	15.7293	24.334	12.0255	13.0024	17.3963		-3.52371	0.00566388	8.95828	15.4077	0.00856157
PAQR6	106.833	90.8272	232.96	69.2876	137.017		29.6002	35.9423	60.8936	23.8574	129.297	17.0809	26.7956		3.50672	0.00566495	127.385	46.2096	0.00857565
TNFAIP8	74.4706	50.1673	59.4439	79.7752	55.404		31.583	59.9873	53.1177	37.7151	27.342	33.4464	37.4613		3.50632	0.00566771	63.8522	40.0933	0.00858973
MARCH7	105.616	91.4365	94.2887	80.8683	58.0761		50.2473	39.2138	72.1151	53.3452	48.7518	49.1929	59.84		3.80541	0.00567248	86.0571	53.2437	0.00860382
METTL15	21.0357	28.3342	15.9648	23.0277	20.436		10.4237	14.481	13.1698	14.2501	15.6328	12.3566	18.2492		3.76517	0.00569126	21.7597	14.0805	0.0086179
BRD7	82.1434	68.1755	85.648	60.7904	67.9946		39.5413	66.1341	55.9434	52.6624	56.5404	44.4087	56.2512		3.5356	0.00571583	72.9504	53.0688	0.00863198
ADAT2	3.65534	5.56172	3.26065	2.97725	4.2158		7.03165	7.7629	7.0479	5.73499	5.10372	7.47841	5.02328		-3.90494	0.00572725	3.93415	6.45469	0.00864606
CCDC165	6.07589	5.05636	5.53149	9.61677	5.27356		6.99417	10.0524	13.6122	13.4932	13.9423	8.24089	23.1635		-3.50182	0.00572834	6.31081	12.7855	0.00866014
C5orf34	0.642332	0.255295	1.09284	0.138235	0.456164		2.78259	2.2277	1.72506	3.65755	0.937208	1.86436	3.58516		-4.18579	0.00573983	0.516973	2.39709	0.00867422
PAPLN	16.1749	11.2007	24.0601	14.9027	11.2996		9.92827	3.60513	9.89108	3.76887	3.97796	9.84898	1.61219		3.62108	0.0057465	15.5276	6.09035	0.00868831
MFSD10	80.0997	75.4524	85.7613	64.6239	66.0446		55.5463	53.857	67.232	57.2397	61.3515	46.0614	60.9109		3.64031	0.00575085	74.3964	57.457	0.00870239
ACTG1	4938.18	5204.28	5133.38	4852.11	5143.64		5522.04	6104.47	7535.36	10428.6	10265.7	6367.47	7428.61		-4.11016	0.00576998	5054.32	7664.61	0.00871647
UBA6	12.0648	9.14511	16.8175	12.0458	7.64504		16.7082	26.7757	17.0169	54.9009	16.8716	21.4354	23.3133		-3.49483	0.00578432	11.5436	25.2889	0.00873055
CPEB2	22.0011	16.1769	18.8825	28.4538	21.5835		11.3983	12.3073	19.039	11.8115	17.143	10.9433	13.6616		3.6056	0.00579825	21.4196	13.7577	0.00874463
DLGAP5	6.11044	4.57648	12.1026	2.09581	2.84381		15.8416	14.1224	19.049	41.351	21.2745	13.585	19.7015		-4.27093	0.00580307	5.54583	20.7036	0.00875871
EPHX1	137.538	189.662	132.903	163.753	297.202		105.392	93.3421	93.911	85.562	81.6819	66.7193	85.8867		4.5494	0.0058038	184.212	87.4993	0.00877279
POU2F3	3.63061	12.1388	9.62943	4.76139	32.9413		1.30217	1.11439	1.5752	4.15923	2.01306	0.619392	1.69318		4.02312	0.00580544	12.6203	1.78238	0.00878688
MOGAT1	0.804413	3.64484	1.24308	2.6506	0.835769		0.188476	0.233017	0.197464	0.14293	0.146025	0.306256	2.44748		3.49151	0.00580835	1.83574	0.523093	0.00880096
MAPK4	9.55318	11.0049	1.80481	15.2609	6.19558		0.198208	9.21256	1.83152	0.341687	0.609979	0.354519	0.0553831		3.55966	0.00582334	8.76387	1.80055	0.00881504
BRCA1	3.617	1.47824	5.04585	1.79139	2.34217		5.58045	5.68393	7.72615	10.4638	5.24779	6.76231	12.2924		-4.05072	0.00582597	2.85493	7.67955	0.00882912
DPP4	218.419	67.7154	34.663	157.398	31.6661		20.4303	10.0344	6.35798	5.49511	6.72309	11.1281	66.3651		3.61515	0.00583421	101.972	18.0763	0.0088432
RNF34	9.98542	11.7496	11.3466	10.2068	9.10705		13.5653	14.5019	12.8069	9.80569	14.6973	14.6847	15.2548		-3.48813	0.00584666	10.4791	13.6167	0.00885728
ARMC7	12.9325	7.4262	15.26	11.2354	10.1858		17.0937	21.9785	21.8968	20.0039	12.5106	24.6453	20.3029		-3.78352	0.00585867	11.408	19.776	0.00887137
DPY30	84.9585	77.5562	73.1379	57.7805	72.888		97.0235	92.622	112.643	136.821	74.032	99.0213	135.711		-3.4892	0.00585964	73.2642	106.839	0.00888545
PEX7	26.8525	22.5201	26.6962	25.1096	21.596		19.3352	21.2684	17.2369	17.1929	17.0968	13.0884	9.13678		3.74063	0.00586289	24.5549	16.3365	0.00889953
HAUS8	8.07483	7.26627	6.17725	4.62056	6.10805		14.2502	8.54733	17.6412	17.1872	8.26286	11.3385	7.24967		-3.50887	0.00587307	6.44939	12.0681	0.00891361
EDNRB	13.0653	15.4663	24.5937	43.3598	22.2213		7.69477	5.35036	8.2087	12.4157	10.1733	12.0306	2.13253		3.49164	0.00588172	23.7413	8.28657	0.00892769
KIF14	1.71884	1.24248	3.87199	1.2903	0.74969		3.35118	5.54853	4.04417	10.1317	6.32859	3.2723	6.96859		-3.97541	0.00589413	1.77466	5.66358	0.00894177
IK	73.1635	74.8558	70.3115	71.3457	86.8534		51.3004	74.9751	51.885	35.7894	62.5036	48.2141	54.3539		3.70077	0.00591685	75.306	54.1459	0.00895585
MAP2K3	40.0559	49.0458	38.6445	40.1444	92.5624		17.6085	25.172	23.3461	22.3666	41.1047	18.4535	19.5304		3.83328	0.00593012	52.0906	23.9403	0.00896994
RFXAP	11.8245	11.5302	10.6033	7.22373	6.5844		17.0443	23.6048	13.6306	15.4623	14.6909	14.3132	17.6547		-3.9986	0.00593256	9.55323	16.6287	0.00898402
IDH3A	62.2122	50.0335	83.1466	83.7898	53.6745		31.5188	37.4817	31.4044	51.7161	48.0667	29.2225	50.6752		3.58616	0.00594358	66.5713	40.0122	0.0089981
RTKN2	1.49223	0.468318	3.19602	0.905876	0.816471		4.49354	3.97397	5.80204	6.25485	1.78559	5.53805	10.0176		-3.8971	0.00595508	1.37578	5.40938	0.00901218
TOP2A	15.6865	7.23905	26.3631	7.60478	4.93026		41.2628	31.026	32.4585	64.1567	38.12	43.2166	67.1893		-4.48132	0.00596845	12.3647	45.3471	0.00902626
SULT1C4	83.6264	138.716	112.874	115.254	342.513		62.9604	63.9929	43.8688	37.3977	65.4786	57.5291	14.6301		3.59704	0.00600418	158.597	49.4082	0.00904034
MTHFD2	13.7496	9.57948	18.6885	19.8377	13.6632		16.016	33.0246	23.5386	45.6001	42.7836	26.3739	84.3416		-3.51449	0.00600747	15.1037	38.8112	0.00905442
CADM2	7.74697	12.8904	0.395813	7.12464	0.629834		0.14159	0.164258	0.146038	1e-06	1e-06	1e-06	1e-06		3.87689	0.00602895	5.75753	0.0645557	0.00906851
NUDT4	114.16	83.8531	62.0582	61.018	118.997		54.9394	44.2693	36.2251	40.1961	46.5232	63.177	30.4118		3.83006	0.00603492	88.0173	45.106	0.00908259
PTTG1	7.36967	10.0128	15.9429	3.76219	9.80777		26.6597	35.6519	17.4108	26.1536	28.7539	15.1489	35.296		-4.08608	0.0060415	9.37907	26.4393	0.00909667
CYP51A1	41.1328	33.9829	60.9253	31.069	44.8762		110.117	87.8319	40.1966	82.3818	71.2912	139.872	224.596		-3.55372	0.0060443	42.3972	108.041	0.00911075
SLC1A2	10.6214	8.51484	30.771	5.08011	7.7196		3.53528	1.32949	1.85718	3.79072	1.39794	4.13389	3.8499		3.85159	0.00606088	12.5414	2.84206	0.00912483
ANAPC1	13.5254	8.80023	9.5213	8.75757	6.77022		13.7931	12.6179	16.9333	17.8643	12.3738	16.2545	19.1637		-3.94029	0.00606303	9.47494	15.5715	0.00913891
PIGU	24.8585	22.6712	29.4476	29.7543	30.308		45.8453	44.4069	47.1961	37.2763	23.6549	42.0282	45.0725		-3.51268	0.00608343	27.4079	40.7829	0.009153
ASB6	38.9445	44.4291	56.9555	40.3471	41.6195		60.6536	62.0788	57.8824	56.1723	54.9812	60.9472	71.2573		-4.19577	0.00609255	44.4591	60.5675	0.00916708
CALU	197.01	162.102	159.491	306.932	125.812		329.855	240.39	242.201	422.834	402.65	469.032	733.774		-3.49916	0.00612602	190.269	405.819	0.00918116
C11orf2	73.3276	96.3809	85.1361	65.8656	93.1953		56.733	56.8784	57.0009	42.315	63.0969	51.4083	79.8692		3.49189	0.00613779	82.7811	58.186	0.00919524
PTPLAD1	40.9917	30.2172	45.3249	36.4364	40.1307		34.2803	21.0188	25.7109	24.4622	25.9414	33.8673	28.8508		3.5039	0.00614512	38.6202	27.7331	0.00920932
CYP4V2	170.164	180.512	42.254	132.398	53.7559		28.4124	17.0014	33.3989	17.9079	15.605	28.999	28.6406		4.42704	0.00614895	115.817	24.2807	0.0092234
WBSCR17	4.17939	15.8447	32.4883	31.6251	37.5249		1.42632	20.8156	0.971798	0.79124	6.86761	1.74274	1.33238		3.46583	0.00616008	24.3325	4.84967	0.00923749
ACVR1C	0.123841	0.978174	0.173424	1.69914	0.36036		1e-06	1e-06	0.256585	1e-06	1e-06	1e-06	0.285567		3.97042	0.00616263	0.666988	0.077451	0.00925157
NRM	51.445	57.6598	38.5863	34.9714	39.7335		74.2469	89.7195	81.0428	63.5562	45.4584	57.5754	99.9357		-3.46442	0.00619268	44.4792	73.0764	0.00926565
TTK	3.10381	2.27074	4.66887	1.81453	1.87541		6.76959	5.80372	5.66436	7.84857	6.3722	5.57161	5.15778		-4.6848	0.00619669	2.74667	6.16969	0.00927973
CD55	52.9602	23.8779	13.3501	29.6995	15.7227		2.37209	11.6525	5.38962	6.20754	25.1875	2.87337	1.61579		3.47977	0.0062041	27.1221	7.89977	0.00929381
SLC45A4	16.7368	30.7591	31.8285	35.872	12.3202		91.3048	41.7214	33.4286	56.5155	48.7156	107.687	99.2021		-3.58474	0.00622249	25.5033	68.3679	0.00930789
NAMPT	97.3658	140.529	94.5091	195.927	103.229		42.0713	58.6836	65.8933	67.1482	100.531	41.2308	83.0974		3.53997	0.00623777	126.312	65.5222	0.00932197
PRR7	2.05153	2.90779	1.80692	2.96912	5.9872		5.12767	6.94225	20.3304	10.0964	7.33552	6.66257	4.56172		-3.53254	0.00623854	3.14451	8.72236	0.00933606
TMPRSS3	2.01635	7.90578	3.49424	4.00967	1.41465		34.9492	35.0684	6.58409	10.8353	3.36032	26.2615	55.364		-3.45145	0.0062522	3.76814	24.6318	0.00935014
FDX1	76.0534	64.2875	63.632	81.7612	72.5968		44.3922	58.6516	41.8118	51.6789	76.0527	43.4893	51.7753		3.50709	0.00625364	71.6662	52.5503	0.00936422
EIF4A1	3.73663	2.88432	4.73311	3.4449	3.63057		1.59738	2.0503	3.11384	2.172	2.76211	1.32781	2.97415		3.48399	0.00626341	3.68591	2.28537	0.0093783
VAMP2	27.3369	43.1128	20.7894	31.3875	42.2634		14.8644	20.7147	31.4656	12.0521	13.1395	9.60582	16.9397		3.46146	0.00626676	32.978	16.9688	0.00939238
MORF4L1	217.461	222.903	213.296	232.02	157.003		129.404	156.319	120.317	150.186	193.686	136.114	165.675		3.55203	0.00626892	208.537	150.243	0.00940646
HAUS5	8.39343	6.70525	6.50831	5.18578	6.574		13.8639	12.9423	14.5489	11.8273	6.3519	9.94446	8.10809		-3.47533	0.00631837	6.67335	11.0838	0.00942055
NXN	148.212	98.6164	128.589	108.169	128.287		139.659	156.765	150.328	189.821	215.349	151.902	198.461		-3.54248	0.00632821	122.375	171.755	0.00943463
CDKN3	2.66635	2.8476	2.73874	1.81019	1.41471		4.09559	5.79107	4.72407	3.14539	4.49668	3.24845	4.14002		-3.92481	0.00634339	2.29552	4.23447	0.00944871
AMDHD1	53.9986	79.8892	38.2275	69.3978	64.3251		18.1341	49.2334	21.9902	7.93423	46.3644	17.5178	25.8624		3.55307	0.00635507	61.1676	26.7195	0.00946279
RFX4	0.207592	1.72423	0.0696074	1.17102	0.829513		1e-06	1e-06	0.391082	0.294499	1e-06	1e-06	1e-06		3.89158	0.00638158	0.800392	0.0979409	0.00947687
SELS	66.7626	89.8329	64.0639	92.8386	89.4788		44.8167	53.6438	54.1444	46.6368	70.0852	50.3437	68.9105		3.57078	0.00641006	80.5954	55.5116	0.00949095
IFT80	19.9997	19.0229	18.5437	20.5813	17.2414		30.4474	21.5078	25.2246	20.5728	21.2645	22.2058	25.1944		-3.50624	0.00642223	19.0778	23.7739	0.00950503
POC5	20.326	18.1253	29.7832	24.2962	17.9646		12.2104	12.2813	16.7434	13.2144	13.8096	13.6718	16.528		4.07756	0.00642385	22.0991	14.0656	0.00951912
UVRAG	21.4076	16.7002	18.1897	21.2379	22.1976		13.4644	13.5565	13.2946	14.4772	18.6582	13.7201	19.0065		3.44311	0.00643004	19.9466	15.1682	0.0095332
ATP10D	15.2705	12.3693	15.0094	14.7561	10.1333		44.0655	32.7148	10.7425	49.1124	20.3182	55.2039	41.6884		-3.74818	0.00643596	13.5077	36.2637	0.00954728
A2M	127.754	93.3565	14.1127	43.3152	86.4793		9.44162	8.73389	7.58734	3.08127	39.716	14.7697	6.49233		3.63948	0.00643984	73.0035	12.8317	0.00956136
EZH2	8.85932	5.88701	9.66509	5.42205	5.2497		12.8683	10.2695	10.8537	10.2444	12.1789	10.9263	20.0492		-3.71869	0.00644885	7.01663	12.4843	0.00957544
LEPREL4	79.9446	63.2447	69.2979	78.4057	82.9777		86.3526	76.4523	104.628	145.755	128.077	99.1038	105.887		-3.48703	0.00647027	74.7741	106.608	0.00958952
AP3S2	83.4596	63.8681	43.0824	93.7774	47.3869		27.7909	18.7198	29.7312	26.7089	41.8152	34.5217	50.8692		3.58209	0.0064706	66.3149	32.8796	0.0096036
TRAPPC2L	13.2398	11.5176	13.7293	15.498	16.0405		1.97372	9.12189	8.49204	6.2579	9.04807	6.07057	6.83118		3.8278	0.00647479	14.005	6.82791	0.00961769
SAMHD1	18.1007	25.322	26.6743	16.9755	6.5901		150.556	321.368	28.8056	92.3103	83.8331	187.905	16.6846		-3.46984	0.00649474	18.7325	125.923	0.00963177
NDNL2	61.104	55.5452	51.0542	59.4888	67.9994		49.1164	36.5487	46.3617	53.4361	41.4924	44.0714	53.8133		3.42924	0.00655298	59.0383	46.4057	0.00964585
SLC25A32	12.1732	10.1436	12.216	12.2686	9.32256		21.1945	24.575	11.6961	52.8702	15.2368	24.3831	35.8146		-3.8043	0.00657656	11.2248	26.5386	0.00965993
PROM2	195.267	137.595	159.962	308.403	141.58		162.395	33.2398	50.1721	44.1708	31.8345	123.048	105.052		3.48379	0.00663703	188.561	78.5589	0.00967401
IAH1	71.2803	62.0233	51.2909	62.6608	75.5765		51.2883	37.2903	38.3266	36.2357	36.8283	44.1626	69.1004		3.4189	0.00663932	64.5664	44.7475	0.00968809
HR	29.2927	20.661	24.3992	22.2385	9.88964		30.4983	23.9877	41.8356	81.1917	77.7461	67.239	52.0323		-3.46466	0.00664479	21.2962	53.5044	0.00970218
GPS2	24.8751	29.1665	30.293	22.6213	35.5886		17.8153	16.6904	24.1922	10.2543	20.1051	13.8965	23.7042		3.43371	0.00664934	28.5089	18.094	0.00971626
ABHD14B	114.293	146.89	141.421	131.002	165.941		95.896	114.425	36.9181	73.6887	93.6987	82.5448	91.9051		3.61411	0.00665157	139.909	84.1538	0.00973034
SEPX1	85.5671	50.8929	26.8575	65.0888	122.375		7.8816	13.6959	48.1595	56.0271	9.12871	6.0904	7.39261		3.41722	0.00666975	70.1563	21.1965	0.00974442
CAPZA2	120.053	141.058	124.96	119.118	101.428		133.754	132.391	154.485	177.424	153.157	154.635	183.643		-3.49608	0.00667858	121.323	155.641	0.0097585
STX19	22.5996	18.7866	19.1941	17.6191	34.1606		5.19051	4.26612	11.0236	21.1823	6.62607	2.65035	13.5603		3.61686	0.00669585	22.472	9.21418	0.00977258
CHPT1	33.9136	43.8153	33.3972	60.1603	52.8849		33.8064	33.176	14.4818	15.5411	22.4827	22.8082	32.5397		3.40963	0.00669888	44.8343	24.9766	0.00978666
GRPEL2	9.97031	13.1421	16.5128	9.61964	10.8816		14.076	17.1006	22.2733	26.4044	14.3696	17.9212	24.8191		-3.45712	0.00672032	12.0253	19.5663	0.00980075
ARHGEF26	16.0271	17.9814	15.7026	15.9341	14.1726		4.29628	19.0251	4.20644	10.7338	4.18785	3.87702	6.78952		3.95577	0.00674171	15.9636	7.588	0.00981483
SCEL	2.10085	16.1466	3.86707	9.43195	2.8844		35.9292	25.3962	10.5425	9.75907	104.983	40.121	51.7136		-3.52097	0.006754	6.88617	39.7778	0.00982891
WDR54	5.19009	9.71336	5.02248	7.69833	4.67006		14.1069	17.2051	13.5597	11.8992	8.34439	9.17022	10.0695		-3.69041	0.00677938	6.45886	12.0507	0.00984299
LRRC1	96.3944	70.5778	38.1723	76.5401	43.5437		25.7146	64.9754	14.4324	21.8956	30.2764	18.0132	7.72888		3.41555	0.00678318	65.0457	26.1481	0.00985707
DHRS11	6.08984	9.04457	7.67788	10.8268	6.45828		14.2935	17.4382	12.1057	9.74219	11.3645	10.6045	14.5856		-3.63658	0.00680286	8.01947	12.8763	0.00987115
TEP1	22.1631	17.4769	26.4238	12.6248	14.0716		8.15099	6.77761	12.0783	3.5395	16.4615	6.90424	9.15779		3.40066	0.00683253	18.552	9.00999	0.00988524
EIF5A	495.061	506.867	568.029	498.487	662.007		336.011	308.98	368.502	474.93	519.782	313.986	453.484		3.41088	0.00687525	546.09	396.525	0.00989932
PLA2G3	1.69478	1.52401	3.60143	0.945336	3.57079		2.29775	7.19015	6.03201	29.7952	26.5251	4.48287	11.7092		-3.39626	0.00691122	2.26727	12.576	0.0099134
TNIP2	16.1182	16.172	18.6436	19.2083	26.0994		8.49194	10.6859	14.5394	7.80731	18.552	13.136	11.3913		3.39042	0.00691374	19.2483	12.0863	0.00992748
CDC25A	2.10537	1.47949	3.77006	3.12133	2.05143		3.89553	3.71342	5.02536	10.5931	4.30971	4.50736	5.51551		-3.5342	0.00693697	2.50554	5.36571	0.00994156
CERS2	61.0099	72.0763	85.8738	77.8195	66.3281		140.024	98.4103	91.439	114.009	67.5345	111.663	117.785		-3.40992	0.00693787	72.6215	105.838	0.00995564
ATP2B3	1.80843	1.72991	1.7669	7.54515	0.872978		0.318896	0.386224	0.88547	1.24329	0.555544	0.0927253	0.11421		3.40425	0.00696794	2.74467	0.513766	0.00996973
C19orf55	2.23483	2.09576	2.69734	1.1029	1.99585		4.90679	7.61889	5.35156	4.84305	2.9122	2.67576	2.52596		-3.40221	0.0069799	2.02534	4.40489	0.00998381
RNASE4	71.2519	267.878	156.624	268.429	460.064		77.0491	30.8971	32.3025	59.3285	141.263	56.211	20.5096		3.56115	0.00698107	244.849	59.6515	0.00999789
BACE1	71.5583	59.5874	66.6598	43.262	54.5515		34.9393	32.4692	39.2983	34.6595	51.2243	44.835	41.6486		3.65399	0.0070047	59.1238	39.8677	0.010012
SUV39H1	6.66656	5.44081	8.79543	5.89011	5.15286		7.71475	9.75972	8.98929	13.8429	9.35225	10.0423	8.49148		-3.60738	0.00701265	6.38915	9.74181	0.010026
FAM72B	1.47599	0.852412	2.25925	0.462828	0.49879		4.55901	3.25768	2.1825	3.66561	3.20869	3.60694	7.0048		-4.15965	0.00701287	1.10985	3.92646	0.0100401
TMEM192	41.9931	33.0417	46.4976	28.0551	28.8846		15.8742	25.9537	21.2336	20.1672	24.7164	13.2596	31.3265		3.3867	0.00702195	35.6944	21.7902	0.0100542
SLC6A14	75.3204	33.2556	24.7925	44.3323	4.66144		3.13542	6.8788	1.56616	5.78281	8.17656	1.12454	2.26191		3.77293	0.00705119	36.4724	4.13231	0.0100683
CYP3A4	0.180846	0.118383	0.0924061	0.556549	1.22561		1e-06	1e-06	1e-06	0.00038363	0.39107	1e-06	0.0323816		3.83965	0.00706387	0.434759	0.0605485	0.0100824
MPST	95.5005	102.263	90.4363	100.46	122.811		67.1609	87.1939	57.9761	39.5296	67.8647	47.0586	97.1253		3.59034	0.00707809	102.294	66.2727	0.0100965
BHMT2	15.2876	11.2525	0.318675	44.105	13.2914		0.706605	1e-06	0.903547	1e-06	1e-06	0.139375	1e-06		3.72686	0.00708141	16.851	0.249933	0.0101105
NSUN2	40.6297	39.27	55.9343	32.0093	30.6494		72.6267	53.5198	51.6521	75.0025	48.0979	63.624	115.01		-3.38878	0.00710468	39.6985	68.5047	0.0101246
WWC3	6.63065	8.51237	13.5025	7.924	11.5104		10.9307	16.5784	12.9549	27.9257	19.5748	15.4742	20.1038		-3.44628	0.00714027	9.61598	17.6489	0.0101387
SFR1	19.3756	16.7101	10.6179	12.5782	12.2774		21.284	37.8979	40.0265	29.7014	25.6788	12.6004	25.6286		-3.37392	0.00714641	14.3118	27.5454	0.0101528
ASPN	2.20506	15.4648	6.06401	9.55916	8.38875		37.3999	57.6286	26.4558	6.4116	70.8825	101.249	23.274		-3.38439	0.00715072	8.33636	46.1859	0.0101669
ITGB4	95.6143	134.071	162.182	125.447	67.2993		332.774	217.098	123.718	139.898	371.008	325.476	323.953		-3.37427	0.00715588	116.923	261.989	0.0101809
TAF2	27.3939	19.0853	25.9231	22.2188	13.7547		36.9617	36.8401	37.5848	110.409	23.7272	44.8478	53.8812		-3.38688	0.00717121	21.6752	49.1788	0.010195
MTUS1	31.7957	29.1501	59.4725	59.242	31.3238		18.9359	16.1283	12.0411	8.32383	38.7501	21.3481	4.93014		3.40701	0.00718478	42.1968	17.2082	0.0102091
SLC7A5	261.234	115.611	54.9343	100.685	182.902		7.40756	14.0574	30.6388	53.3548	44.5582	15.3331	117.01		3.37017	0.00718525	143.073	40.3371	0.0102232
FAM173B	21.9235	22.3541	23.2821	25.5568	20.7975		35.5815	28.3151	29.539	34.3716	25.5084	36.2754	60.7402		-3.70841	0.00719425	22.7828	35.7616	0.0102373
STEAP1	155.766	57.4631	14.7581	82.9873	34.0777		9.24173	10.5449	6.79059	4.63698	8.23545	6.35107	13.2634		4.43252	0.00721192	69.0104	8.43773	0.0102514
AR	3.17098	2.2088	0.919382	0.997213	3.19611		0.438519	0.832481	1.63833	0.300925	0.180421	0.60456	0.362796		3.39734	0.0072137	2.0985	0.622576	0.0102654
SDF4	227.202	259.935	176.041	293.194	275.28		157.112	131.851	162.24	172.535	175.452	153.941	181.862		4.10698	0.00723072	246.33	162.142	0.0102795
MCM4	42.9611	29.9458	49.1535	21.9373	19.1527		85.8823	64.0927	66.8021	52.923	56.5363	79.2895	91.9933		-4.13642	0.00730268	32.6301	71.0742	0.0102936
RIN1	8.91534	12.4517	13.2346	11.0548	9.50691		3.99947	3.68715	7.01936	5.47154	11.5131	3.87527	8.22742		3.53395	0.00731149	11.0327	6.25619	0.0103077
CCDC85A	4.81063	7.34256	9.85055	2.58534	1.97183		1.94712	1.63588	1.69061	0.932699	0.705321	1.86716	0.230597		3.40211	0.00731222	5.31218	1.28706	0.0103218
CCT8	190.674	172.137	214.873	161.077	179.064		251.894	326.322	205.231	322.696	195.114	225.155	355.289		-3.46425	0.00733421	183.565	268.814	0.0103358
C14orf135	23.8585	19.5812	15.114	14.8465	12.8693		30.5133	30.3714	32.4181	34.2704	22.1959	30.5426	17.8423		-3.49412	0.00733546	17.2539	28.3077	0.0103499
C15orf38	103.446	94.0426	70.7377	72.5288	72.0566		46.0347	54.8185	61.4586	57.6094	76.2062	54.1814	55.4794		3.57367	0.00743175	82.5623	57.9697	0.010364
NKIRAS2	67.6885	52.2294	91.6861	61.591	51.1449		103.258	101.984	104.016	115.594	69.7992	97.7835	123.042		-3.68662	0.00743703	64.868	102.211	0.0103781
ARFIP1	65.2644	65.5816	67.4133	64.9562	40.2523		35.1744	31.3419	30.9904	33.1924	52.8321	39.1315	50.4362		3.45511	0.00748335	60.6936	39.0141	0.0103922
ATAD5	4.37383	2.68613	4.41862	2.20555	1.2539		6.73312	7.16143	6.64296	10.6825	5.74666	8.05434	11.1707		-4.19045	0.0075089	2.98761	8.02739	0.0104063
CBFA2T2	12.553	8.51905	13.3791	10.7293	7.89836		14.203	14.0535	26.867	19.8683	11.7179	17.2392	19.782		-3.36799	0.00751125	10.6158	17.6758	0.0104203
KARS	408.421	374.791	419.814	291.363	505.679		212.871	277.691	321.165	273.18	326.967	190.852	265.514		3.457	0.00751628	400.014	266.891	0.0104344
RRAGA	204.222	261.852	259.048	210.599	268.386		194.481	243.285	145.779	133.433	199.772	154.718	142.56		3.35403	0.00752387	240.821	173.433	0.0104485
UHRF1	15.9785	8.36608	20.6201	7.56665	5.65915		28.648	34.3852	26.4909	40.3106	26.825	25.3095	43.1743		-4.36288	0.00753912	11.6381	32.1634	0.0104626
ALDH1A3	16.55	77.3179	28.6083	55.4303	18.5474		251.755	41.8996	47.6231	132.554	400.69	285.498	199.6		-3.34363	0.00754877	39.2908	194.231	0.0104767
PRPF4	25.3222	23.7659	27.827	21.011	37.3462		19.7749	25.9708	12.372	12.4017	14.1661	17.6291	17.4273		3.35202	0.00758715	27.0545	17.106	0.0104907
PSMD7	159.618	214.964	189.26	218.077	280.18		126.987	117.525	138.943	160.322	161.4	115.986	164.874		3.6987	0.00760608	212.42	140.862	0.0105048
GLB1L	29.979	21.6321	21.3324	20.8694	26.1449		12.0605	7.57952	23.6621	7.8752	17.1459	10.9471	17.252		3.52686	0.0076275	23.9916	13.7889	0.0105189
MRRF	24.2877	26.4211	23.4943	15.15	22.7968		36.6781	35.8336	29.4777	41.162	23.5394	31.9917	45.0846		-3.4424	0.00762768	22.43	34.8239	0.010533
SLC10A6	2.76899	4.26538	1.70527	3.20431	1.13845		17.3164	4.6553	3.02009	3.78809	23.7103	24.0529	11.7635		-3.34463	0.00765549	2.61648	12.6152	0.0105471
DDX5	1106.63	912.431	836.286	740.793	783.812		467.751	487.852	742.082	849.101	347.606	411.612	625.324		3.40476	0.00766079	875.99	561.618	0.0105612
ARMCX5	18.7555	12.4754	15.2164	9.91981	14.5378		12.1038	6.55529	11.3114	8.79409	6.39017	7.93403	4.12992		3.33044	0.00766147	14.181	8.1741	0.0105752
ZFPL1	47.1174	67.4641	58.1595	54.4179	60.57		36.4504	44.3718	42.068	33.4912	43.8182	33.834	60.3998		3.3272	0.00769111	57.5458	42.0619	0.0105893
KAT2A	25.3944	18.5417	24.3688	14.9026	18.5876		27.585	30.5817	33.9706	50.1588	24.361	26.6932	60.7608		-3.32792	0.0077017	20.359	36.3016	0.0106034
PYGL	563.924	335.738	398.954	221.587	239.75		252.292	149.309	181.577	183.486	105.991	157.698	114.8		3.64525	0.00770573	351.991	163.593	0.0106175
PCDHGA1	7.41364	2.13132	8.46262	11.1917	4.80773		1.74723	1.22283	2.35178	0.220905	1.86288	1.83651	2.75382		3.32916	0.00771941	6.8014	1.71371	0.0106316
NEURL1B	0.937884	2.09943	4.14681	0.652046	1.58757		4.22156	5.03246	8.44153	4.82656	6.27023	5.38372	13.5862		-3.9774	0.00776743	1.88475	6.82318	0.0106456
DDX50	55.8092	49.2276	45.6526	33.6172	40.0899		66.6341	66.8669	74.2315	61.5289	57.4477	60.6897	71.423		-4.16174	0.00780587	44.8793	65.546	0.0106597
CLSTN1	284.705	240.098	137.22	215.809	156.766		118.911	91.6852	82.6295	122.691	122.428	120.328	119.104		4.02055	0.0078241	206.92	111.111	0.0106738
ASF1B	1.55822	2.36717	3.21908	1.95847	1.69784		4.95898	4.97393	2.25054	8.69992	3.50936	2.95494	9.28804		-3.35017	0.00783965	2.16016	5.23367	0.0106879
EHHADH	53.5976	31.7618	48.9277	28.4771	54.946		27.2972	8.51748	19.9219	10.2972	18.2802	22.6991	38.9914		3.33122	0.00786559	43.542	20.8578	0.010702
TOMM34	23.8962	16.0094	17.3755	11.7621	19.0592		29.3761	29.8609	41.3263	33.2699	16.4133	26.0722	41.9787		-3.33217	0.00786662	17.6205	31.1853	0.010716
LATS2	22.3831	21.8293	16.8756	25.6422	15.966		23.2192	33.2667	30.6237	28.5326	26.4543	32.7112	53.5984		-3.31704	0.00787659	20.5392	32.6294	0.0107301
FAM110A	45.2834	50.6184	39.7943	56.664	46.3594		78.1122	119.318	56.4361	75.9077	49.4365	64.3013	79.2721		-3.40658	0.00788557	47.7439	74.6834	0.0107442
C17orf61	74.8652	124.17	115.222	90.3443	142.002		51.7073	77.6253	59.4221	41.5661	95.8567	48.3094	77.0176		3.34563	0.00788587	109.321	64.5006	0.0107583
C2orf72	1.73928	4.96417	1.4168	13.7744	8.06765		0.753209	1.19841	1.8726	0.283733	0.136493	0.428467	1.13719		3.46154	0.00789114	5.99246	0.830015	0.0107724
TMEM144	6.3746	11.7653	6.75453	6.4211	6.36693		5.16946	4.03564	3.80869	5.11772	3.87834	4.87461	3.62336		3.95404	0.0079142	7.53649	4.35826	0.0107864
FAM149B1	17.6397	17.7191	15.5364	13.5259	12.0699		23.9983	26.1534	16.6182	21.9208	15.7203	24.9228	27.006		-3.31408	0.00794592	15.2982	22.3343	0.0108005
ARV1	11.654	13.6321	8.8828	7.42769	6.4953		14.232	15.953	15.8122	17.9237	17.0239	14.1021	24.8342		-3.84324	0.00796099	9.61838	17.1259	0.0108146
AGTRAP	43.5774	94.312	71.2396	136.541	112.484		22.7735	56.6668	20.9667	28.0362	61.1504	25.7986	50.9024		3.3962	0.00796346	91.6308	38.0421	0.0108287
SMCR7	13.6016	17.2724	24.3133	15.9645	21.4291		8.97689	9.20006	18.5951	10.3071	10.8404	6.02865	12.9782		3.30366	0.00797433	18.5162	10.9895	0.0108428
C4orf21	1.76867	1.59822	2.02306	0.977754	1.18105		2.67247	2.67024	7.83143	2.83181	1.79478	2.78137	2.6951		-3.30194	0.00800793	1.50975	3.32531	0.0108569
HYI	14.6791	19.475	11.6814	12.7203	21.2038		9.42575	8.71089	8.08297	3.76595	16.6156	7.13461	5.29287		3.32905	0.00802771	15.9519	8.43266	0.0108709
CGN	41.144	35.0744	58.0865	41.2362	34.1423		33.3056	9.89768	15.4815	14.1095	27.389	20.3751	36.4373		3.4164	0.00804112	41.9367	22.4279	0.010885
PNPO	70.9747	51.588	55.698	49.1729	51.7992		33.5222	38.2308	45.1531	58.2679	30.307	30.3321	40.0164		3.30521	0.00805217	55.8466	39.4042	0.0108991
ASGR1	13.7209	56.7092	13.5304	122.889	40.1603		13.3965	4.71126	7.11526	14.2533	2.37775	5.58123	0.464105		3.31538	0.00806075	49.402	6.84277	0.0109132
ORC6	3.06523	3.00601	6.07416	4.43336	3.50994		6.01482	6.25308	6.28645	10.7096	8.59743	4.26511	9.45509		-3.36628	0.00809417	4.01774	7.3688	0.0109273
XPNPEP1	58.8631	59.7801	68.9806	65.1228	62.3128		31.5485	39.7568	54.2188	60.5161	50.7994	28.8012	38.2414		3.68171	0.00809591	63.0119	43.4117	0.0109414
RHEB	90.8727	86.6747	74.9525	97.1994	87.0899		59.7488	63.9623	66.3017	82.4949	82.541	59.8634	46.1626		3.38135	0.00809712	87.3578	65.8678	0.0109554
ORC1	2.2741	2.15092	3.98042	1.13192	1.53189		3.15454	4.49419	4.66875	10.7364	6.10202	2.9206	7.9366		-3.40354	0.00809849	2.21385	5.71616	0.0109695
POLR2G	32.5535	48.607	33.5396	42.4546	44.4151		18.977	18.4196	27.2758	29.1295	32.0242	17.5799	38.4426		3.31636	0.00810036	40.314	25.9784	0.0109836
KIF23	7.81239	6.75034	14.835	3.90543	3.89773		22.9517	11.4836	11.2014	19.6064	28.2862	22.7518	24.7996		-3.75226	0.00813274	7.44018	20.1544	0.0109977
ZNF785	9.77674	7.6887	5.62835	6.16455	5.19382		2.41728	5.95007	4.81084	4.26043	4.12213	3.74034	3.34988		3.34917	0.00813621	6.89043	4.093	0.0110118
PACS1	23.7937	24.3448	44.4608	25.9773	24.5735		14.6316	12.8043	18.4095	17.3596	16.9003	14.4966	24.0155		3.61018	0.00813884	28.63	16.9453	0.0110258
GCLM	75.8557	95.5996	135.395	129.238	116.538		42.5367	56.1954	54.621	146.148	41.9212	29.0695	32.178		3.39915	0.0081529	110.525	57.5243	0.0110399
ATPAF2	9.06159	13.4448	12.6561	14.1471	22.008		5.62145	7.26857	8.02408	9.31152	11.6356	5.15875	6.41143		3.47262	0.00816623	14.2635	7.63306	0.011054
C20orf132	0.754881	1.206	1.28473	1.04194	1.46567		1.45883	1.33257	5.74439	3.00598	2.66151	1.94333	2.16664		-3.34447	0.00817014	1.15064	2.61618	0.0110681
CDCA3	11.1773	10.3238	27.4742	6.71309	8.54758		40.5687	19.3834	27.9748	31.2513	42.2777	31.0695	40.2323		-4.02599	0.0081852	12.8472	33.2511	0.0110822
SPAG9	29.6557	26.1608	29.7275	34.3918	22.5681		33.2644	41.0155	33.498	30.5644	48.2228	48.7373	48.8809		-3.29552	0.00820367	28.5008	40.5976	0.0110963
SMURF2	28.2033	28.3505	32.3552	27.2677	23.5569		37.8504	45.2627	27.0717	35.8746	68.1186	47.7448	41.5476		-3.44277	0.00823385	27.9467	43.3529	0.0111103
MFAP3	23.6806	12.6226	22.0845	18.1574	13.1825		27.7574	23.3389	40.8469	34.4581	20.547	33.615	38.8738		-3.46798	0.00823441	17.9455	31.3482	0.0111244
CHST2	56.6439	37.4839	62.3961	61.175	27.5949		16.5823	28.1141	49.5332	6.80112	11.5403	20.1783	17.1277		3.30499	0.00827983	49.0588	21.411	0.0111385
DEPDC1B	4.44593	4.87696	5.93366	2.77079	2.47327		8.62431	12.3354	5.86709	9.33961	10.132	4.19691	9.8808		-3.39992	0.00829125	4.10012	8.62516	0.0111526
C6orf154	6.34101	7.22588	4.95049	6.35718	14.2178		1.5741	1.64679	8.52886	5.58345	1.89051	1.32495	1.02611		3.34195	0.00829221	7.81847	3.08211	0.0111667
SDHD	201.721	156.277	284.34	162.135	163.928		103.846	104.812	115.366	105.436	147.668	107.261	134.039		3.92909	0.00830752	193.68	116.918	0.0111807
PRR24	1e-06	1e-06	1e-06	1e-06	1e-06		2.99735	1e-06	1.26848	0.997607	1e-06	2.12581	0.81668		-3.86519	0.00831206	1e-06	1.17228	0.0111948
KLHL34	1.51614	1.50099	1.0892	1.15817	4.23781		0.406201	0.798401	0.826817	0.370351	0.723665	0.948541	0.14992		3.30657	0.00831396	1.90046	0.603414	0.0112089
FGF20	1e-06	1e-06	1e-06	1e-06	1e-06		0.994666	0.414394	1e-06	1e-06	1.25559	0.528477	0.408003		-3.86485	0.00831534	1e-06	0.514447	0.011223
RIPK4	20.5087	23.1153	38.7041	23.094	14.4274		41.7983	56.724	48.8998	30.0185	34.6139	41.2625	95.5626		-3.34993	0.00832178	23.9699	49.8399	0.0112371
STK24	80.7269	85.0215	90.9385	83.7203	68.0151		162.529	71.5652	132.439	143.227	97.8991	142.294	128.293		-3.44878	0.00833219	81.6845	125.464	0.0112511
NSMCE2	25.8715	29.847	25.3023	24.9782	30.6126		57.1806	56.5304	36.9509	85.2201	24.8769	58.8534	40.687		-3.64318	0.00833341	27.3223	51.4713	0.0112652
NFXL1	9.45511	9.72309	9.01378	7.6806	3.90661		16.7733	23.3706	11.8579	40.8818	7.98819	16.1154	24.1175		-3.27792	0.00833757	7.95584	20.1578	0.0112793
RPS10	1e-06	1e-06	1e-06	1e-06	1e-06		0.280994	0.759494	1.3827	0.646896	0.416172	1e-06	1e-06		-3.8618	0.00834483	1e-06	0.498037	0.0112934
FASTKD5	15.3092	17.5385	23.1118	11.3672	11.9045		28.2515	22.7432	36.5461	33.4116	17.0319	23.8355	33.217		-3.43536	0.00835316	15.8462	27.8624	0.0113075
EIF4B	108.016	152.179	170.21	109.909	231.822		103.725	83.5388	95.6386	65.3283	79.4399	66.7611	70.6744		3.92542	0.00835779	154.427	80.7294	0.0113215
NRD1	29.7138	22.3829	31.9718	30.8939	22.0692		16.1087	17.7465	17.6668	20.9556	26.2979	18.6678	17.2868		3.45344	0.00836076	27.4063	19.2472	0.0113356
ALX1	1e-06	1e-06	1e-06	1e-06	1e-06		0.332329	1e-06	1.02192	0.247675	1e-06	0.261155	0.199664		-3.85913	0.00837073	1e-06	0.294678	0.0113497
H3F3C	590.001	542.586	605.416	435.108	436.729		897.111	664.514	787.433	523.752	651.186	818.429	744.111		-3.32659	0.00840498	521.968	726.648	0.0113638
METTL17	22.7825	33.3287	32.0604	31.3798	30.9689		10.3305	12.3957	22.1404	37.7161	9.62606	8.36836	10.855		3.57806	0.00842757	30.1041	15.9189	0.0113779
SNX6	42.2242	47.1578	53.7282	50.7017	35.129		59.9929	62.4292	59.709	68.6392	73.4739	59.5902	57.1489		-3.95448	0.00844101	45.7882	62.9976	0.011392
AGPAT5	53.7245	47.7974	61.5521	42.6985	37.8682		30.2553	28.9011	18.5296	41.1523	44.4682	29.7455	18.5564		3.30075	0.00844826	48.7281	30.2298	0.011406
NT5DC2	24.2908	38.8287	49.6098	28.9855	33.9375		44.6506	40.3384	63.4033	76.8166	83.6166	46.7905	75.0267		-3.33364	0.00845638	35.1305	61.5204	0.0114201
C8G	1e-06	1e-06	1e-06	1e-06	1e-06		0.401238	1e-06	1.94053	0.293814	1e-06	0.307223	0.236938		-3.85003	0.00845968	1e-06	0.454249	0.0114342
SCRIB	47.3791	38.6194	61.8854	33.281	33.5437		72.019	77.3285	71.7516	92.9696	42.9898	69.9099	168.922		-3.2704	0.00847909	42.9417	85.1272	0.0114483
VEGFC	27.947	40.6407	46.578	51.035	35.5934		22.0284	23.6975	36.8238	27.8447	25.5903	22.6842	13.5274		3.27875	0.00848171	40.3588	24.5995	0.0114624
C17orf81	43.4295	40.6274	44.7212	29.7285	37.2176		25.7608	34.3739	37.1353	24.2074	22.3918	23.8153	28.2642		3.29882	0.00849565	39.1448	27.9927	0.0114764
LOC646862	1e-06	1e-06	1e-06	1e-06	1e-06		1e-06	1.44652	0.310095	0.244748	1.68765	0.254573	1e-06		-3.84401	0.00851906	1e-06	0.56337	0.0114905
LEO1	52.4154	43.8142	44.1936	43.2089	37.3964		39.1714	21.3861	25.288	19.2874	30.7178	35.503	39.1471		3.40044	0.00856431	44.2057	30.0715	0.0115046
FRYL	11.7535	6.15788	14.3652	7.71909	6.62361		19.3015	17.189	11.4587	43.7975	11.687	25.9856	20.7886		-3.27306	0.00860865	9.32386	21.4583	0.0115187
FUT11	25.5866	20.7074	18.1252	29.0128	15.6227		32.7023	30.3631	31.7547	24.7367	37.9426	38.8904	58.5018		-3.32835	0.0086098	21.8109	36.4131	0.0115328
PBX3	14.2654	18.1007	13.7804	25.8791	18.5537		23.2108	32.9301	18.3546	39.8523	35.851	26.1149	39.6159		-3.29073	0.00865101	18.1159	30.8471	0.0115469
MSH3	22.6234	16.6335	20.805	14.3729	18.4583		8.25797	10.0344	10.923	10.8324	17.4574	9.85768	17.8583		3.26503	0.00866281	18.5786	12.1745	0.0115609
CHMP2B	59.6206	74.0359	60.3542	72.6074	50.4005		86.2453	106.77	74.5056	92.4568	63.1074	92.2547	103.4		-3.28948	0.00867241	63.4037	88.3914	0.011575
CHAC2	21.1374	18.595	10.6103	13.3699	11.4064		8.07753	6.97814	7.16228	9.40215	7.46001	7.98407	8.1386		4.35852	0.00870699	15.0238	7.88611	0.0115891
FBXL12	23.7517	21.9069	22.9876	31.4555	25.3985		32.4406	39.6181	37.8025	39.1561	21.9782	36.581	40.647		-3.25113	0.0087332	25.1	35.4605	0.0116032
IL18BP	60.3956	53.9651	29.5297	133.062	104.02		9.29486	15.5924	35.0036	23.3676	65.3729	8.67605	14.4711		3.26637	0.00876995	76.1945	24.5398	0.0116173
SLC15A4	52.2727	62.9171	27.1674	56.4983	45.7206		190.821	104.385	63.2751	66.6081	58.2381	180.012	141.239		-3.24932	0.00877305	48.9152	114.94	0.0116314
SH2B2	12.3698	17.7196	12.0512	32.2986	13.8138		4.60387	11.8309	9.03744	10.5444	7.60828	4.15778	7.22853		3.37309	0.00877788	17.6506	7.85874	0.0116454
MAPK14	22.2153	17.1747	20.1717	15.9061	11.3373		33.8635	23.4368	23.4489	31.1974	19.6818	37.5565	30.5632		-3.42227	0.00878477	17.361	28.5354	0.0116595
IRX3	106.117	122.98	122.653	114.045	102.479		38.9628	98.2891	108.596	42.5918	57.0077	22.0282	39.2923		3.7245	0.00881133	113.655	58.1097	0.0116736
FIP1L1	33.4966	32.4211	34.2532	27.6073	32.7664		57.5462	46.3725	41.8887	74.3845	27.9444	57.3942	62.8047		-3.56851	0.00882607	32.1089	52.6193	0.0116877
ARMCX3	201.68	128.029	155.944	202.993	157.837		124.028	119.004	139.747	131.2	100.973	114.853	75.3818		3.31941	0.00883592	169.297	115.027	0.0117018
POU3F2	1e-06	1e-06	1e-06	1e-06	1e-06		8.26992	1e-06	1e-06	0.7716	0.215253	7.33568	1.1515		-3.81042	0.00885919	1e-06	2.53485	0.0117158
SLC44A3	9.25509	14.4033	10.5172	11.5475	14.6542		11.8247	8.57202	3.71755	5.52281	8.45447	6.92362	4.31704		3.31375	0.00886465	12.0755	7.04746	0.0117299
CYP26A1	0.409498	5.44463	0.439847	3.66268	1.08623		151.776	2.65938	4.86216	10.2084	5.79915	85.633	135.929		-3.24	0.00886951	2.20858	56.6953	0.011744
NFRKB	13.5476	10.5238	18.4828	12.1325	9.55111		5.46256	6.67242	9.45345	8.11878	9.12519	6.57452	9.38976		3.47152	0.00889639	12.8476	7.8281	0.0117581
SHCBP1	7.80643	5.67291	9.55841	5.08442	2.99353		10.1142	11.1365	10.4553	18.7387	19.6271	8.36141	23.4313		-3.41116	0.00894138	6.22314	14.5521	0.0117722
TMEM65	16.0351	18.3824	19.9203	19.79	10.9599		27.9872	28.0784	15.5609	38.1257	31.5669	28.5963	27.96		-3.29196	0.00895431	17.0175	28.2679	0.0117862
ZNF16	8.12485	6.03595	10.9917	5.26586	5.79828		13.9212	16.2565	16.2419	30.0954	5.50621	17.2515	15.4175		-3.2477	0.00896043	7.24333	16.3843	0.0118003
RNF121	27.9125	25.5074	34.0075	24.5249	29.8397		20.6685	16.3937	17.0329	18.3695	20.5575	25.9262	27.9778		3.23632	0.00898222	28.3584	20.9894	0.0118144
AGBL2	6.35777	6.12777	4.18569	6.61725	3.8803		3.51588	2.96174	2.93972	2.87332	3.06089	3.30009	4.68271		3.66031	0.00899481	5.43376	3.33348	0.0118285
ZNF614	4.30881	4.27431	0.690802	2.28171	4.58501		1e-06	1e-06	4.7284	1e-06	2.53008	1e-06	1e-06		3.74587	0.00899596	3.22813	1.03693	0.0118426
TTC5	22.7109	22.3878	22.2448	17.6249	20.6045		14.6829	16.9754	20.6102	13.4844	15.3135	12.2761	19.5827		3.26131	0.00900412	21.1146	16.1322	0.0118566
KIF20A	9.34509	8.81004	22.4893	6.08056	5.9429		20.7654	31.0551	18.7727	23.7653	35.4076	18.0084	40.0829		-3.79344	0.00901972	10.5336	26.8368	0.0118707
TSG101	53.9174	61.3474	56.4566	78.691	68.9834		35.8773	35.2828	48.8282	40.6305	61.6825	36.8756	57.252		3.23089	0.0090237	63.8792	45.2041	0.0118848
SLC1A6	0.26343	3.24359	1.86477	14.7508	12.0066		1e-06	0.797855	0.366103	0.0920661	1e-06	1e-06	1e-06		3.5858	0.00903048	6.42584	0.179433	0.0118989
SCRG1	325.623	153.974	120.059	40.2651	545.75		1.50484	48.3722	11.2421	173.307	29.9432	1.64689	1.26515		3.28458	0.00903154	237.134	38.1831	0.011913
MFSD1	20.7214	19.0709	21.2052	24.731	10.4548		35.7875	32.892	28.3165	47.4441	23.0383	31.1027	69.6798		-3.2879	0.00904611	19.2367	38.323	0.0119271
ESCO2	4.07623	4.28726	9.42715	0.725071	2.63578		21.9996	14.9662	11.8642	26.223	11.9591	16.4546	47.1295		-3.91088	0.00909557	4.2303	21.5137	0.0119411
SRC	61.7635	39.6263	38.2386	51.859	46.633		72.6462	88.0986	160.826	143.414	58.8823	81.8073	50.8493		-3.31632	0.00911596	47.6241	93.7891	0.0119552
WDR76	6.86456	5.78156	6.74751	3.21709	5.25533		14.4085	7.04771	7.34768	7.99172	11.0672	11.8145	10.208		-3.42397	0.0091307	5.57321	9.98362	0.0119693
SGCA	30.4911	35.0867	16.4341	20.797	35.6583		4.63838	7.26063	20.7201	18.947	20.3322	4.40731	5.622		3.2998	0.00915256	27.6934	11.704	0.0119834
GJB1	101.444	31.6341	11.18	10.6288	120.507		3.20773	1.25787	5.88725	2.26594	0.535942	2.6815	40.9234		3.25503	0.00916564	55.0788	8.10852	0.0119975
XK	34.7186	28.3495	28.5632	39.6445	14.9745		17.5183	29.1407	6.10319	8.76682	8.91941	16.206	6.74169		3.22217	0.00917943	29.2501	13.3423	0.0120115
VAC14	30.8377	27.0928	26.6966	25.4556	35.2645		17.4637	22.914	22.889	16.3369	23.6515	16.5651	28.8475		3.22917	0.0091865	29.0694	21.2382	0.0120256
NCAPG	9.91234	5.27059	17.8586	5.21939	3.18169		21.5058	16.887	15.1525	31.319	31.1493	20.4168	46.0269		-3.7791	0.00920447	8.28852	26.0653	0.0120397
EXOC5	29.4205	25.4562	26.8164	26.578	17.8656		32.0598	32.0265	39.1783	56.0219	43.8608	42.8073	25.8649		-3.22262	0.0092211	25.2273	38.8314	0.0120538
ITPRIP	38.3616	52.0939	55.7763	60.4885	73.9468		61.1932	81.0207	77.3784	112.277	167.973	84.7897	188.333		-3.23882	0.00924612	56.1334	110.424	0.0120679
PYROXD2	25.0114	21.1161	17.9839	15.0587	20.6796		6.96604	2.5228	27.2441	5.141	6.32536	5.88433	10.2166		3.53487	0.00929756	19.9699	9.18575	0.0120819
SETD6	62.8724	77.8309	86.7516	59.2255	85.152		50.5227	72.7886	49.1226	52.4716	53.5031	35.8571	51.4435		3.24551	0.00929772	74.3665	52.2442	0.012096
USP39	29.3304	26.0184	32.4879	18.1124	19.5421		50.2439	40.937	32.9987	39.8481	27.7172	44.6483	44.1943		-3.48425	0.00930682	25.0982	40.0839	0.0121101
PRLR	143.742	80.3548	9.42952	82.9831	8.91006		3.01977	46.2317	4.80134	0.857005	1.68383	1.33032	1.29492		3.30378	0.00931808	65.0839	8.45984	0.0121242
DNAJC6	3.26399	1.07757	2.22151	1.35555	1.41809		0.204387	0.795798	2.40281	0.491979	0.380205	0.221672	0.547112		3.25269	0.00934003	1.86734	0.720566	0.0121383
ATPBD4	25.6912	29.4936	20.9112	39.911	36.3556		18.5239	17.5779	21.9771	13.9536	21.7719	16.3911	18.3549		3.73754	0.00935152	30.4725	18.3643	0.0121524
ZNF276	15.5844	14.783	19.5164	13.6851	12.968		11.7209	10.9594	14.9533	10.9811	11.064	10.3867	8.1539		3.25334	0.00938988	15.3074	11.1742	0.0121664
NUDT22	26.8372	34.4085	34.0156	34.5421	26.5278		9.42253	15.1906	15.262	20.02	25.5416	9.94342	31.1533		3.46024	0.009484	31.2662	18.0762	0.0121805
TLR6	12.4507	11.1957	6.01867	16.0027	20.4117		6.67002	6.1124	4.43606	2.34965	5.88959	8.00186	4.80712		3.39453	0.00958033	13.2159	5.46667	0.0121946
ZNF592	17.702	17.0465	19.0207	13.9289	19.6299		9.89062	12.7016	10.4513	8.55881	16.8166	11.3984	16.5438		3.23708	0.00960937	17.4656	12.3373	0.0122087
RABL2B	29.279	28.9898	22.4513	25.4278	25.2682		18.2462	22.4869	16.6651	8.27698	16.0665	20.2518	18.8982		3.41226	0.0096159	26.2832	17.2702	0.0122228
PCNA	189.32	72.4945	83.393	101.476	71.8168		236.311	210.435	175.777	225.494	148.987	205.421	270.679		-3.92666	0.00961905	103.7	210.443	0.0122369
SESN2	13.5311	9.88382	10.5338	16.0012	8.46345		2.31603	9.71283	7.39123	3.13118	6.67606	4.2988	8.12874		3.26973	0.00962409	11.6827	5.9507	0.0122509
TSPAN18	5.15859	8.10865	4.67457	6.65574	9.468		9.30432	10.3367	13.2698	26.0267	17.3485	17.4412	87.6324		-3.34706	0.00964934	6.81311	25.9085	0.012265
SIGLEC15	0.909077	1.16359	0.250237	2.03167	0.289474		1e-06	1e-06	1.95713	0.54706	1e-06	1e-06	1e-06		3.66261	0.00967631	0.92881	0.357742	0.0122791
SAT2	9.24578	14.943	12.3417	9.82844	15.1068		7.05713	7.12167	2.11212	2.59761	13.4393	5.24901	3.37258		3.38978	0.00968078	12.2931	5.84992	0.0122932
DUSP7	25.7846	19.1489	26.8332	21.7576	19.4585		27.2419	31.9303	41.3596	47.1415	29.4263	28.4599	24.6282		-3.18883	0.00968853	22.5966	32.884	0.0123073
GSTM1	34.2511	51.845	64.3814	45.0322	70.7391		27.8329	18.8907	48.1325	31.2767	31.2143	9.80636	23.4235		3.20673	0.00969974	53.2498	27.2253	0.0123213
TOMM70A	75.6785	63.8352	87.7937	69.5799	72.9862		34.9487	51.3764	71.7838	65.1553	47.7485	34.847	54.1017		3.3121	0.00970646	73.9747	51.4231	0.0123354
RPA1	49.3879	40.4301	43.8921	37.0545	45.6022		73.0219	64.3261	44.4155	63.4815	41.7061	66.5965	68.5102		-3.24844	0.00970648	43.2734	60.294	0.0123495
GPR125	73.83	41.7939	136.278	42.829	76.967		14.6292	41.3693	43.2749	27.5323	43.8149	18.3273	12.652		3.23894	0.00980243	74.3396	28.8	0.0123636
GAS8	22.6523	15.2627	18.52	9.37815	18.9224		7.11673	7.27199	11.2003	6.72883	14.3272	6.31559	9.83033		3.34254	0.0098091	16.9471	8.97014	0.0123777
SLC22A4	2.77499	7.01237	2.673	14.0047	9.28384		3.53413	1.09245	2.49306	1.20503	0.970977	2.4653	0.390914		3.27545	0.00982072	7.14978	1.73598	0.0123917
CARM1	15.0233	15.8835	15.6785	15.7862	9.59623		20.3332	21.5959	21.9891	30.9491	16.8304	20.9279	18.7518		-3.37361	0.00985619	14.3935	21.6253	0.0124058
CAB39L	79.0337	36.5819	26.1009	32.6428	54.5826		25.8283	4.33947	11.4501	12.4871	19.8616	22.9788	28.2186		3.17834	0.00985681	45.7884	17.8806	0.0124199
CENPL	6.92453	4.27375	8.38306	3.9512	5.62956		7.3006	12.6029	9.75388	22.8029	12.5374	6.10201	14.4166		-3.17847	0.00986521	5.83242	12.2166	0.012434
KRT75	0.361129	0.782855	0.241482	2.63482	0.246874		4.64103	0.374994	10.9512	2.42532	6.45905	5.3226	17.3176		-3.19451	0.00988675	0.853432	6.78454	0.0124481
HJURP	4.80694	3.9679	12.7354	2.28167	1.89532		18.7017	13.1576	11.0758	20.8569	12.1635	13.8932	33.5552		-3.84468	0.00989066	5.13745	17.6291	0.0124622
CHRDL2	5.54466	16.6259	2.6488	20.4151	15.6965		0.236158	2.46238	2.93966	10.8425	0.803757	0.845236	0.217105		3.183	0.0098961	12.1862	2.62097	0.0124762
SLC25A4	268.373	232.779	273.97	234.342	294.557		137.053	120.455	240.932	201.61	227.381	96.4701	165.863		3.43574	0.00993966	260.804	169.966	0.0124903
MRFAP1	583.211	557.757	588.138	523.239	503.249		330.476	335.845	416.419	442.058	504.585	372.506	564.445		3.38925	0.00994699	551.119	423.762	0.0125044
CHIC2	41.355	48.424	33.1299	42.7335	31.4893		73.7822	126.998	50.1675	118.109	34.4324	77.7586	145.163		-3.37946	0.00995076	39.4263	89.4872	0.0125185
SEPHS1	81.1596	56.2634	71.0358	59.2703	59.7066		43.1692	66.1171	40.8189	39.874	53.2736	42.9661	51.3301		3.19872	0.00995118	65.4871	48.2213	0.0125326
PHLDB2	23.7819	20.1472	18.1382	48.1517	23.5352		4.35428	9.33515	10.896	4.97811	27.4845	9.5006	15.386		3.1826	0.00996256	26.7508	11.705	0.0125466
PELP1	38.0665	27.4013	43.3605	29.403	34.302		19.1443	22.8859	23.6398	18.9739	30.1082	19.3211	32.6142		3.19937	0.00997908	34.5067	23.8125	0.0125607
ITFG1	93.9798	82.4745	78.3392	108.176	61.9206		44.7273	56.753	48.1905	41.6672	91.4438	51.6184	57.6908		3.18704	0.00999886	84.978	56.013	0.0125748
BACE2	17.8098	63.3407	28.4313	64.0737	21.8333		166.905	139.79	44.3242	57.2916	115.89	171.425	769.78		-3.17065	0.0100219	39.0978	209.344	0.0125889
ASNA1	92.4435	76.9663	89.9437	75.0334	95.3377		62.825	67.7716	78.8891	84.2343	45.7714	53.3031	54.907		3.22557	0.0100266	85.9449	63.9574	0.012603
MICALL2	11.9949	17.2384	19.4278	21.4738	15.2327		3.85664	10.1083	12.0842	7.67806	10.2775	5.13607	15.6017		3.25497	0.0100384	17.0735	9.24892	0.012617
ZFP64	32.2942	24.7534	36.5788	22.9668	18.7863		47.8507	34.7213	56.3342	58.734	27.2734	46.9477	45.2463		-3.26094	0.010046	27.0759	45.3011	0.0126311
GABPB2	9.30163	8.26072	10.6675	7.1586	4.52113		11.265	18.6503	9.56375	14.0002	13.4165	14.9811	19.5619		-3.44996	0.0100642	7.98192	14.4913	0.0126452
EFCAB4A	34.2732	44.0172	45.1647	25.5885	69.1722		25.3672	20.9055	13.3474	16.5365	16.3669	14.3258	44.5424		3.20848	0.0100642	43.6432	21.6274	0.0126593
C1orf135	4.13306	2.74927	3.74635	2.59748	2.9939		6.0231	9.60318	4.87986	15.641	3.49917	4.78585	5.78799		-3.30753	0.0100704	3.24401	7.17431	0.0126734
PTX3	24.3561	15.3873	8.39708	6.93551	11.3403		58.6468	37.9861	15.6961	32.7603	27.0834	46.44	316.209		-3.20779	0.0100733	13.2833	76.4031	0.0126875
EXO1	2.67673	2.3647	3.43922	1.52341	1.6941		2.75914	5.73369	4.05887	8.345	4.65597	2.59576	5.30643		-3.18153	0.0100997	2.33963	4.77927	0.0127015
TSTD1	233.415	217.658	381.491	190.623	338.826		149.096	75.7035	173.279	81.6623	117.185	129.682	286.305		3.165	0.0101026	272.403	144.702	0.0127156
IL17RA	133.486	140.701	168.022	138.96	137.225		150.923	93.3327	99.6928	98.5712	107.95	133.686	86.7876		3.25383	0.0101182	143.679	110.135	0.0127297
LCTL	1.65695	1.49822	1.52415	0.891053	1.08565		3.30048	1.47475	2.51218	2.32983	1.53591	2.53174	2.07529		-3.22082	0.0101419	1.3312	2.25145	0.0127438
RACGAP1	13.4161	13.1981	26.9192	15.5624	13.129		47.0387	22.0463	16.0337	21.7725	52.192	40.6516	47.9074		-3.16145	0.0101915	16.445	35.3775	0.0127579
ATG13	48.2892	33.703	36.7154	43.2321	38.1176		30.0249	23.2838	28.3417	29.6	30.9932	33.1834	37.8417		3.23378	0.0102009	40.0115	30.467	0.012772
PPFIA3	1.00871	1.35541	2.31131	1.41361	0.710468		5.90917	17.1568	6.81616	1.41534	4.96495	6.41078	1.30794		-3.23233	0.0102038	1.3599	6.28302	0.012786
GPANK1	53.9918	59.1789	45.7058	42.5754	57.21		71.8475	98.2521	82.1497	78.3787	49.2989	58.6515	76.966		-3.16181	0.0102127	51.7324	73.6492	0.0128001
ANP32E	56.7493	46.4339	64.8496	45.5476	43.0584		74.0924	65.8764	89.6352	96.8176	52.0419	60.3243	109.048		-3.15957	0.0102258	51.3278	78.2623	0.0128142
EXOC1	34.602	30.1216	31.5742	21.5705	18.24		39.5347	50.2439	35.5214	69.5329	32.4254	43.9553	47.1075		-3.30676	0.0102309	27.2217	45.4744	0.0128283
BCO2	8.06832	9.30617	6.53796	7.78561	8.58212		6.43839	3.7355	3.50446	0.99882	3.58891	5.53589	1.18787		3.56228	0.0102673	8.05604	3.56998	0.0128424
UTP14C	8.18497	5.94566	6.60022	5.5429	4.24762		9.31751	12.5245	11.3769	8.1443	9.62746	7.46705	7.69882		-3.39068	0.0102757	6.10427	9.45093	0.0128564
RAB24	29.317	48.2024	35.734	40.5546	26.8188		14.7253	29.3305	31.1703	29.6773	14.0447	13.5528	12.5858		3.17844	0.0102774	36.1254	20.7267	0.0128705
PHF21B	4.285	1.52092	2.41744	0.821421	3.64166		0.110459	0.155412	5.15176	0.307427	0.345874	0.0803225	0.391713		3.21714	0.0103046	2.53729	0.93471	0.0128846
ERLEC1	95.9447	87.4319	78.8264	131.732	100.85		79.5859	70.074	48.2922	45.8841	74.7431	73.39	79.0851		3.17448	0.0103064	98.957	67.2935	0.0128987
IER5L	19.7395	52.0073	26.1603	27.2141	38.6656		49.5798	107.378	81.1994	66.7674	50.1398	53.4209	45.1193		-3.36661	0.0103348	32.7574	64.8007	0.0129128
GOT2	2.22889	3.0966	3.45488	3.42246	1.85213		1.55828	2.63139	1.29557	1.53116	1.54958	0.506289	1.16104		3.17489	0.0103375	2.81099	1.4619	0.0129269
HSF1	42.162	47.0592	48.1849	32.4829	40.7764		78.2019	73.8055	54.3921	156.216	41.8944	64.3801	104.702		-3.3308	0.0103429	42.1331	81.9417	0.0129409
AP2A2	77.4516	73.7805	69.7657	70.8242	63.8071		51.1303	50.5781	54.4555	41.5085	75.1003	53.4	63.743		3.30843	0.0103446	71.1258	55.7022	0.012955
C17orf42	16.5562	13.375	17.4449	11.8726	16.8229		31.2484	22.0181	22.0255	31.6703	13.8209	20.1584	23.3326		-3.15771	0.0104235	15.2143	23.4677	0.0129691
EIF2C2	13.5715	8.99549	19.7168	11.4264	10.1527		19.3219	27.8452	16.6292	67.3947	15.3767	25.8964	56.0307		-3.18532	0.0104747	12.7726	32.6421	0.0129832
CCDC127	13.0921	10.4188	17.1048	11.439	9.38802		16.6775	19.672	17.2883	30.5549	11.5448	25.2603	31.286		-3.14386	0.0105006	12.2885	21.7548	0.0129973
NFYA	19.2859	14.8827	18.2924	9.75343	5.34543		28.1192	54.0657	29.2803	39.5132	23.8247	26.9466	289.222		-3.14698	0.0105479	13.512	70.1388	0.0130113
NAF1	32.5467	38.8484	33.1087	24.6744	31.369		20.9202	22.4929	22.4805	28.0473	24.6034	18.4038	28.4656		3.26108	0.0105605	32.1094	23.6305	0.0130254
MEGF9	415.875	292.405	68.8572	424.025	74.5873		22.163	54.9211	42.7607	45.6333	34.4714	25.9798	24.1463		4.03867	0.0105642	255.15	35.7251	0.0130395
TRIP13	12.1299	11.0198	11.001	4.15534	7.85788		16.2852	15.2911	23.7502	39.5453	15.1261	11.1389	36.6861		-3.19283	0.010581	9.23278	22.5461	0.0130536
PARK7	64.3622	61.4454	72.0934	65.5314	82.948		49.5463	41.6417	72.685	40.6162	56.6726	32.4375	52.1711		3.22503	0.0105974	69.2761	49.3958	0.0130677
CNIH4	31.8159	42.9224	39.8589	25.8447	33.4075		41.9269	60.9178	42.8024	61.6356	51.2464	37.5379	62.8813		-3.20079	0.0106126	34.7699	51.2783	0.0130817
FAM107B	97.8411	67.808	17.1656	101.234	27.106		5.96773	23.5268	10.2505	8.84146	19.0715	8.39932	13.9468		3.63158	0.0106238	62.2309	12.8577	0.0130958
CBWD1	42.3476	42.7358	41.1432	41.4471	41.4382		70.4059	41.9028	57.1404	55.4137	42.4597	57.2348	60.1064		-3.62447	0.0106483	41.8224	54.952	0.0131099
MTHFSD	18.3529	17.9354	23.7094	14.9494	19.569		17.4139	13.6626	9.37532	10.9631	11.658	13.5075	17.0797		3.13402	0.0106563	18.9032	13.38	0.013124
SGOL1	4.56699	2.86825	7.95173	2.66588	3.71993		5.80591	9.26267	7.12828	15.2823	9.63191	5.6745	20.3477		-3.18539	0.0106722	4.35456	10.4476	0.0131381
STARD10	65.0043	64.6333	52.7274	70.26	94.9395		46.4827	44.0013	47.0075	44.8273	46.503	38.5387	58.2255		3.67669	0.0107111	69.5129	46.5123	0.0131521
ATP13A1	35.5961	28.7438	42.7555	33.1196	33.6309		57.2117	50.1405	52.0443	59.7977	32.9172	54.4143	37.6099		-3.13186	0.0107295	34.7692	49.1622	0.0131662
SCYL1	47.8885	47.9434	62.7934	51.99	48.7414		32.527	34.2386	35.6147	26.0486	42.054	31.8017	58.7751		3.22408	0.0107444	51.8713	37.2942	0.0131803
AANAT	5.25782	13.781	0.725329	40.3718	64.6488		1e-06	0.486968	2.00671	1.79924	1e-06	1e-06	1e-06		3.45638	0.0107707	24.9569	0.613275	0.0131944
COMMD8	21.7534	20.1493	33.0359	16.0763	15.738		36.9956	40.1593	21.7377	85.2659	28.615	38.2907	56.8889		-3.12561	0.010777	21.3506	43.9933	0.0132085
SYT9	13.429	8.40803	21.6624	12.6437	7.8811		2.44707	17.8196	3.15113	1.77637	1.28016	5.24783	4.7321		3.20193	0.0107906	12.8048	5.20775	0.0132226
KAT2B	30.4086	22.7294	29.8065	18.5452	54.6753		11.5115	21.1692	13.9927	9.51064	18.381	13.6434	12.3537		3.52579	0.0107945	31.233	14.366	0.0132366
HACL1	19.6779	31.6172	16.796	27.6574	23.2353		5.61901	11.248	26.9036	15.1398	8.54514	4.49873	11.3814		3.24117	0.0108225	23.7968	11.9051	0.0132507
MRPS15	36.2095	36.9262	30.1995	40.8167	41.1737		25.0069	27.9085	25.3984	26.0292	23.6672	10.0484	27.2426		3.31959	0.0108229	37.0651	23.6145	0.0132648
EFNA3	8.55762	15.1465	13.0473	10.4083	22.3384		19.5445	42.8982	79.2465	55.2951	20.5515	18.0131	21.9597		-3.1251	0.010917	13.8996	36.7869	0.0132789
MID1IP1	35.7073	43.9328	27.0076	37.7238	54.5842		78.2543	61.0732	52.3957	70.6676	51.5112	69.6335	55.8745		-3.58138	0.0109405	39.7911	62.7729	0.013293
PERP	284.673	491.865	433.855	344.62	249.363		636.108	1051.1	309.581	769.869	779.297	607.741	554.109		-3.11948	0.010951	360.875	672.544	0.0133071
ADPRHL2	55.162	58.1928	55.0734	33.8663	75.8654		32.6956	33.7567	49.7333	27.3999	35.2757	19.3408	27.9789		3.21907	0.0109641	55.632	32.3116	0.0133211
ATP2B4	32.8487	22.9805	22.1846	26.959	18.4061		35.4344	29.3608	37.3677	30.1655	105.862	72.3503	69.0076		-3.22417	0.0109768	24.6758	54.2212	0.0133352
ATP13A2	38.175	27.9269	27.8364	44.0404	41.8583		17.38	24.4395	20.4909	14.5929	23.8704	17.7401	39.9401		3.11423	0.0109882	35.9674	22.6363	0.0133493
C19orf44	5.89952	5.48373	5.39709	4.97408	3.77064		8.37256	5.95035	10.1652	6.97788	5.7852	6.45655	6.90216		-3.15157	0.010991	5.10501	7.22999	0.0133634
GLE1	17.3722	18.8242	18.4198	11.8626	12.028		24.3322	28.0988	21.5786	18.7293	18.6223	24.7878	30.6982		-3.33636	0.0110155	15.7014	23.8353	0.0133775
ELOVL7	2.8211	5.71068	5.08055	3.05168	0.737936		17.9942	19.9017	7.14172	11.5733	5.98435	15.354	16.8215		-3.64238	0.0110212	3.48039	13.5387	0.0133915
TRIM45	15.489	19.757	18.1198	13.4092	12.5481		36.8921	36.2712	32.8916	28.3637	13.3629	25.0997	20.0347		-3.15414	0.011025	15.8646	27.5594	0.0134056
FXC1	76.5506	55.1637	75.5098	79.2072	55.4107		45.3299	44.9113	58.2569	61.5825	48.7756	45.0831	36.8894		3.23751	0.0110481	68.3684	48.6898	0.0134197
TMED6	8.44667	8.04822	10.9655	4.43112	5.00025		6.0633	3.18371	5.08818	2.10392	3.52526	3.20346	2.27518		3.19726	0.0110837	7.37835	3.63472	0.0134338
BSCL2	94.9765	99.2699	95.8827	99.7415	93.9852		63.3184	75.7683	72.8288	43.1519	70.2507	51.3126	101.934		3.582	0.0111283	96.7712	68.3664	0.0134479
FGGY	11.7715	20.361	9.39924	8.2654	28.936		5.752	10.2806	3.75571	3.4104	9.27541	4.89362	3.42642		3.29497	0.0111306	15.7466	5.82774	0.0134619
NR4A2	20.3416	19.0602	10.4621	9.36005	75.6875		2.48361	8.39291	14.0199	1.9711	6.08798	3.38023	2.06941		3.25574	0.0111464	26.9823	5.48645	0.013476
STRN3	34.0525	31.1243	29.8586	31.5541	22.6051		35.5936	39.8945	39.9079	38.0477	43.5458	43.9982	35.1942		-3.66468	0.0111486	29.8389	39.4546	0.0134901
DNMT1	22.8532	17.4114	19.3878	12.8663	11.9755		32.1103	27.3893	26.7113	30.1265	25.7658	26.814	24.6723		-4.07932	0.0111509	16.8988	27.6556	0.0135042
GALNTL1	21.6528	11.3312	12.7166	6.38708	13.8851		60.5673	11.2121	30.2848	57.3145	21.0306	62.6431	198.195		-3.17819	0.0111513	13.1946	63.0353	0.0135183
ARHGAP11A	9.49615	6.69594	18.2374	4.60126	4.0066		31.3925	14.271	15.1498	22.732	26.4869	27.1583	25.6682		-3.77109	0.0111624	8.60747	23.2655	0.0135324
TRAPPC1	75.0805	71.3789	84.9221	81.4973	87.2658		50.2167	56.9635	55.7233	55.6341	84.4716	57.9515	76.4968		3.20361	0.0111664	80.0289	62.4939	0.0135464
KIF18B	2.48202	1.56166	5.66389	0.98101	0.780406		8.82302	8.50946	6.71909	7.5897	6.54253	6.56705	12.4771		-4.14941	0.0111715	2.2938	8.17542	0.0135605
ACLY	53.7267	48.8958	70.0789	61.199	40.6868		66.3	93.8843	52.0107	101.319	99.3633	82.2755	143.215		-3.10751	0.0111765	54.9174	91.1954	0.0135746
MRPL13	18.572	21.0447	25.3649	14.9336	19.5096		39.9576	36.2163	31.596	108.614	19.5588	33.3858	47.6358		-3.27333	0.0111795	19.885	45.2806	0.0135887
DUSP11	30.8738	34.0506	28.2193	24.5907	32.5148		39.8492	43.2048	34.2673	35.9249	33.6344	34.4259	47.3895		-3.18491	0.0111898	30.0498	38.3851	0.0136028
TRIM21	25.2989	24.9622	21.953	20.0585	22.3899		17.5668	23.1783	15.1175	9.76909	13.899	14.1405	19.7322		3.29796	0.0112078	22.9325	16.2005	0.0136168
C1orf122	18.0051	16.652	21.081	15.5829	63.0506		6.32066	8.96904	13.7909	13.6251	6.69408	4.12591	7.49693		3.40236	0.0112169	26.8743	8.71752	0.0136309
VANGL1	24.2738	23.9961	37.8345	22.7895	14.43		35.0996	40.3303	26.5775	79.4708	43.775	44.4235	75.8987		-3.13477	0.0112335	24.6648	49.3679	0.013645
LRRC48	6.76089	3.70653	5.99406	5.82765	4.51714		2.80391	4.77912	4.20011	3.14278	3.46896	3.05559	1.9035		3.12034	0.0112337	5.36125	3.33628	0.0136591
CTDNEP1	74.6072	90.9534	68.9773	82.306	87.082		61.1231	50.0226	52.6583	42.8851	71.043	58.4488	84.4237		3.15575	0.0112518	80.7852	60.0864	0.0136732
CSH2	106.301	0.454139	0.103127	661.427	1.85446		1e-06	0.55556	1e-06	1.18109	1e-06	1e-06	0.257719		3.14222	0.0112629	154.028	0.28491	0.0136872
DAK	39.5534	41.3751	52.2918	38.3566	33.3058		10.1413	21.9876	16.873	10.1964	30.4521	6.85119	43.6217		3.41152	0.0112845	40.9765	20.0176	0.0137013
CYTH3	12.4666	14.7368	15.2518	12.3673	14.9102		25.2433	27.9709	28.4938	16.4716	41.3479	35.2712	11.9653		-3.42179	0.0112848	13.9465	26.6806	0.0137154
SNAPC1	10.3262	8.51009	10.349	12.5739	10.3039		15.2287	9.7676	15.5935	16.4861	15.5613	15.088	11.4222		-3.09805	0.0112908	10.4126	14.1639	0.0137295
PPIG	78.2163	77.2928	69.3113	59.1482	71.535		38.866	41.7558	56.6503	45.381	55.076	41.1843	80.7402		3.19958	0.011318	71.1007	51.3791	0.0137436
DKK2	3.91108	10.3552	2.31845	3.98776	3.09142		10.1881	19.1968	14.0971	3.16515	11.1691	30.399	37.2444		-3.09629	0.0113222	4.73278	17.9228	0.0137577
TMEM132B	2.65431	4.49522	21.1476	5.6483	12.0624		1.12693	5.53308	1.2249	0.400505	3.97557	1.27172	0.899134		3.15247	0.0113341	9.20157	2.06169	0.0137717
DDX41	53.8786	56.7126	64.9555	45.2511	53.5048		34.0563	42.8283	60.6018	41.1321	36.609	27.0707	34.6555		3.14016	0.0113347	54.8605	39.5648	0.0137858
KIAA2013	200.739	186.393	218.459	172.325	225.532		101.568	165.12	115.782	96.4452	168.592	96.8352	209.819		3.28297	0.0113579	200.69	136.309	0.0137999
CD47	195.376	318.732	422.026	314.458	299.871		82.555	158.339	173.231	163.811	218.552	70.5423	282.471		3.12215	0.0113639	310.093	164.214	0.013814
SGK1	37.8167	63.6528	69.8914	89.7261	83.0067		21.0097	52.2526	34.5987	53.3716	25.2336	25.9753	8.42833		3.12839	0.0113732	68.8187	31.5528	0.0138281
ERCC6L	3.10465	1.36103	5.19761	1.55767	0.75133		8.38287	9.47807	5.21701	10.4401	7.13678	7.90412	8.49928		-4.11659	0.0114275	2.39446	8.15118	0.0138421
NECAB3	5.07373	3.09679	3.21008	3.66701	3.2061		21.6152	6.6517	36.7797	8.53037	2.61397	12.8319	16.9611		-3.41499	0.0114345	3.65074	15.1406	0.0138562
FOXF1	1.0925	1.973	1.16586	1.58964	3.568		0.319237	0.468368	1.03955	0.519473	1.75712	0.755267	0.513995		3.11578	0.0114478	1.8778	0.767573	0.0138703
PARVA	232.042	175.094	165.329	109.031	296.2		83.478	94.6133	73.3862	88.3446	187.236	77.2772	85.1364		3.29509	0.0114516	195.539	98.496	0.0138844
DGKZ	40.3045	35.4726	32.6907	27.928	39.5882		18.3742	24.7883	24.2857	24.2615	29.9725	23.0455	35.773		3.09004	0.0114646	35.1968	25.7858	0.0138985
GABARAPL2	121.122	149.598	87.6462	142.87	121.984		87.4169	86.9686	83.9575	65.0614	91.5156	79.8451	98.8589		3.53669	0.0114646	124.644	84.8034	0.0139125
ENDOU	1.14173	13.5062	3.57323	17.3871	38.9925		1.68002	1.08232	1.42474	0.588104	0.49574	0.945858	0.0891594		3.42461	0.0115187	14.9202	0.900849	0.0139266
NAV3	3.46696	3.37952	5.43847	2.18968	4.66802		0.981335	2.07387	2.80088	1.67065	2.92856	2.07363	1.33531		3.12805	0.0115641	3.82853	1.9806	0.0139407
DRAP1	107.349	120.028	122.096	109.494	155.262		55.705	67.7382	96.4226	87.6105	95.7755	45.1084	115.908		3.18687	0.011592	122.846	80.6097	0.0139548
HNRNPH3	155.609	168.835	167.122	124.089	135.817		269.646	195.711	202.578	174.822	142.66	239.548	221.114		-3.08333	0.0116344	150.294	206.583	0.0139689
PRKAG2	37.6527	24.3612	37.6919	23.0228	16.096		14.8166	16.0264	14.998	15.1412	18.067	13.1584	7.48763		3.32826	0.0116533	27.7649	14.2422	0.013983
METTL9	331.618	419.935	240.709	405.487	443.761		196.596	302.477	212.312	285.38	246.975	190.683	202.484		3.37355	0.0116923	368.302	233.844	0.013997
RAD23A	95.5262	114.866	113.456	108.686	109.563		140.121	142.738	120.985	157.452	103.759	134.149	123.238		-3.10977	0.0117178	108.419	131.777	0.0140111
L3MBTL3	16.6339	17.5336	15.0877	12.2229	7.51895		22.9637	32.2747	26.4823	39.8206	16.1651	20.5721	21.2845		-3.25069	0.0117275	13.7994	25.6519	0.0140252
CALB2	59.426	35.1328	34.5036	57.3053	31.0203		0.738238	9.15331	14.8855	78.1605	0.809492	0.719326	0.684177		3.4821	0.0117453	43.4776	15.0215	0.0140393
SCP2	124.082	128.059	99.8511	96.4011	181.193		72.5408	79.7997	75.0359	87.4505	106.612	59.1838	75.0991		3.40419	0.0117575	125.917	79.3888	0.0140534
NUPL1	25.4547	20.8007	25.0953	22.894	13.4145		31.615	30.2704	34.2092	46.4294	27.1292	33.039	35.0818		-3.50745	0.0117827	21.5318	33.9677	0.0140675
ALDH6A1	51.0613	37.4678	51.0789	36.4055	48.633		32.5117	34.8131	37.3812	39.9333	23.7101	33.3672	23.0139		3.08401	0.0117956	44.9293	32.1044	0.0140815
HCCS	17.3312	21.6878	25.0661	19.3487	16.2709		36.9916	27.0813	29.5971	38.8839	17.3266	28.3022	31.0356		-3.07209	0.0118313	19.9409	29.8883	0.0140956
ESRP2	35.6211	36.6757	45.3591	22.2606	17.1571		13.6162	20.1098	10.3139	11.3918	22.5356	10.7195	17.2034		3.31665	0.0118758	31.4147	15.1272	0.0141097
RABGEF1	21.2013	24.3454	24.6855	20.9365	19.2952		31.6118	59.4564	25.8037	35.3213	32.7351	27.4113	25.1818		-3.24327	0.0118854	22.0928	33.9316	0.0141238
NSFL1C	91.2288	117.796	115.469	106.751	127.39		161.28	138.781	180.661	146.309	106.68	160.841	130.626		-3.0701	0.0118926	111.727	146.454	0.0141379
NODAL	1.72663	4.27489	0.615249	0.498883	2.44105		22.3739	1.66381	3.41401	8.78054	4.77672	20.4536	22.9224		-3.10616	0.0118968	1.91134	12.055	0.0141519
SEBOX	0.780693	0.68431	0.396307	0.774637	0.787254		3.2906	0.709134	3.05101	1.44116	2.06236	0.654922	1.83979		-3.15042	0.0119269	0.68464	1.86414	0.014166
MAP4K2	11.8401	13.1551	22.9968	12.2374	24.9369		6.82221	7.23734	10.6847	9.26657	8.75137	4.73782	13.6198		3.1929	0.0119928	17.0333	8.7314	0.0141801
MED22	39.6818	29.2917	36.1534	22.6322	29.9855		38.5698	55.6031	44.5651	48.4322	33.432	52.5464	88.521		-3.06215	0.0120012	31.5489	51.6671	0.0141942
CCNE1	5.80287	6.6625	5.76406	6.53012	3.80982		7.0531	18.1849	15.1629	27.9724	7.17837	7.09748	10.3832		-3.18086	0.0120082	5.71387	13.2903	0.0142083
DOM3Z	61.9178	77.888	69.0555	52.6183	93.8361		40.3366	73.2663	52.954	46.7839	35.6018	34.1454	44.1445		3.08735	0.0120353	71.0631	46.7475	0.0142223
ZNF219	19.5252	12.2383	16.5809	11.7028	12.6412		10.0407	7.26661	15.5129	9.23663	7.01465	6.25313	9.897		3.06217	0.012042	14.5377	9.31737	0.0142364
PIAS4	22.9446	18.6182	20.5064	22.9349	19.183		30.2899	23.4013	29.9415	26.3283	19.194	27.2729	28.4362		-3.06446	0.0121645	20.8374	26.4092	0.0142505
SLITRK6	21.3704	4.90778	2.8289	9.69533	1.27657		1.18125	0.805258	2.50721	0.97031	1.1748	0.318737	0.0821901		3.13366	0.0121711	8.0158	1.00568	0.0142646
HS3ST1	16.7785	20.4871	32.6542	66.9983	22.0012		21.0755	9.25802	11.7101	4.32931	10.8286	17.626	4.64022		3.10179	0.0122	31.7839	11.3525	0.0142787
PINK1	48.4837	54.079	61.4653	52.4836	78.4686		27.9223	68.1184	30.1421	35.0313	35.965	25.7877	45.7626		3.07542	0.0122109	58.996	38.3899	0.0142928
FAM160A2	23.7757	19.2081	20.9923	15.8101	15.2774		9.50693	12.6002	17.2886	12.1803	16.2202	9.56444	14.7862		3.06219	0.0122198	19.0127	13.1638	0.0143068
KLHDC7A	7.63303	5.34682	6.29287	14.983	10.6671		4.6499	1.67232	3.26949	1.13247	5.33547	4.86944	5.82543		3.05336	0.0122221	8.98456	3.82207	0.0143209
CES2	21.5124	23.7382	12.0585	11.5765	70.7788		7.76594	7.16563	12.0139	5.36669	5.58261	4.53292	3.06167		3.53852	0.0122252	27.9329	6.49848	0.014335
C7orf60	14.1627	14.1579	13.6299	9.35845	6.95113		12.5703	16.3639	20.7479	34.5166	19.3849	17.8439	29.9981		-3.10477	0.0122377	11.652	21.6322	0.0143491
AGPAT3	19.8061	16.861	25.1438	21.0498	43.2672		15.2949	10.0089	6.84133	18.9141	7.97298	11.7908	18.5963		3.09858	0.0122378	25.2256	12.7742	0.0143632
NOTCH1	56.246	45.2213	108.684	26.4066	19.9288		173.361	112.863	141.634	168.467	52.6844	171.606	230.712		-3.36925	0.0122387	51.2973	150.19	0.0143772
MAOA	37.7968	42.5953	40.6464	36.7308	94.8621		25.9667	38.677	28.972	18.7642	12.2657	28.7185	15.0443		3.12916	0.0122663	50.5263	24.0583	0.0143913
WDHD1	9.47466	5.65265	9.05189	3.56903	5.16566		12.9944	11.3534	15.3962	21.1514	9.60955	12.755	8.9954		-3.37849	0.0122709	6.58278	13.1793	0.0144054
C9orf91	14.6448	16.9968	11.1049	14.6625	17.1775		12.1289	11.3217	5.40103	7.11527	10.1899	10.6292	12.5051		3.07208	0.0122738	14.9173	9.89873	0.0144195
SPG7	36.0978	41.0883	38.9457	46.384	29.1256		23.9169	15.8896	26.0164	18.8104	32.4271	20.2074	40.4566		3.08303	0.0122999	38.3283	25.3892	0.0144336
RNF122	8.23788	28.0072	13.5142	12.8431	14.6756		122.554	39.3632	17.5939	28.1371	49.1247	86.6444	18.1534		-3.06081	0.012316	15.4556	51.653	0.0144476
BIRC2	75.4517	88.5113	90.1181	74.6812	78.5076		61.097	83.1523	59.2835	70.652	73.6959	57.0805	50.6523		3.0856	0.0123585	81.454	65.0876	0.0144617
FAM190B	15.5281	13.6278	20.5662	13.2699	11.2637		16.0941	21.9605	17.3204	29.297	23.9071	21.0268	26.9798		-3.15102	0.0123698	14.8511	22.3694	0.0144758
CCDC77	3.52181	4.68654	2.4834	3.01533	2.48383		8.70035	5.12592	5.31813	2.71093	5.56428	6.02775	6.42859		-3.04844	0.0123962	3.23818	5.69656	0.0144899
CCNB2	6.45958	6.21578	14.5443	4.22774	3.93625		22.2006	12.9273	8.6923	11.3764	22.6314	18.4219	19.4013		-3.37189	0.0124082	7.07673	16.5216	0.014504
RFTN2	13.8344	14.0147	49.4855	30.3664	32.6112		10.0858	7.57062	8.40774	7.72742	20.6011	11.4177	2.03132		3.05653	0.0124084	28.0624	9.69167	0.0145181
IKBKB	15.5345	18.8654	18.0156	19.8737	12.8681		13.6674	14.2639	14.5271	11.1305	11.0961	12.7978	9.06616		3.14692	0.0124566	17.0315	12.3641	0.0145321
PRC1	10.4228	8.29956	20.295	7.69144	5.23412		17.8135	17.7828	14.8622	27.2054	44.3442	14.5302	43.3414		-3.15183	0.0124649	10.3886	25.6971	0.0145462
ZBTB6	20.3739	13.0157	21.4757	16.8034	11.6272		25.8879	28.0461	25.7773	25.6878	17.9469	28.9843	32.1018		-3.40747	0.0124811	16.6592	26.3474	0.0145603
DNMT3B	1.8606	1.3665	2.09863	1.29975	1.38358		4.25329	2.80182	7.45869	4.01356	1.14469	3.06418	3.57364		-3.18941	0.0124983	1.60181	3.75855	0.0145744
ZNF140	6.30417	2.00291	3.28877	3.23402	2.33509		9.04001	8.33946	6.90372	8.03554	4.36343	9.18832	4.2498		-3.319	0.0125129	3.43299	7.16004	0.0145885
MYO9B	30.3293	28.1214	27.8781	32.7364	28.0446		71.9913	36.7175	53.3282	45.5954	39.397	83.6652	28.8915		-3.40541	0.0125246	29.422	51.3694	0.0146026
HSPA13	74.3332	52.354	44.1652	80.932	47.2473		72.3713	88.8489	92.343	160.189	82.8751	101.763	86.4844		-3.1693	0.0125711	59.8063	97.8392	0.0146166
PTGIS	7.98305	18.904	6.1478	12.0409	15.4989		30.9826	117.118	17.3622	13.3174	29.7255	47.7594	208.766		-3.10947	0.0126046	12.1149	66.433	0.0146307
WDR93	1.98962	0.829404	1.72533	1.15093	1.29831		0.162892	0.399334	1.12267	1.26551	0.390148	0.0682412	0.209072		3.23407	0.0126269	1.39872	0.516838	0.0146448
TMEM168	35.1682	28.2988	36.2328	21.148	16.7975		43.3488	46.3963	55.1956	64.6693	34.7466	41.9424	50.3032		-3.49126	0.012637	27.5291	48.086	0.0146589
IFT46	54.1095	49.3795	37.2453	36.2673	63.5928		39.2737	39.1079	28.514	30.6149	27.1531	28.5279	24.9795		3.33477	0.0126393	48.1189	31.1673	0.014673
SMYD5	20.5229	16.6167	19.3444	13.7208	16.9253		28.5694	23.3742	27.2522	31.5276	14.1401	26.6538	29.904		-3.04724	0.0127157	17.426	25.9173	0.014687
TXNDC11	86.3086	117.988	113.183	246.436	167.843		86.3518	82.8724	54.1827	52.5448	52.3569	72.1707	78.5523		3.55774	0.0127532	146.352	68.4331	0.0147011
CXorf38	12.4272	10.3262	14.6697	11.4624	7.78032		6.99823	9.75427	7.02594	6.98587	8.24312	6.0008	6.94437		3.41435	0.0127533	11.3332	7.4218	0.0147152
EBP	27.5267	33.9338	27.3807	33.6508	37.6484		49.5254	57.2056	31.2559	38.9963	40.7886	48.179	38.6624		-3.02565	0.0127769	32.0281	43.5162	0.0147293
BBS5	10.1762	11.7713	5.76218	6.64326	8.32581		4.94262	3.86732	5.54666	6.47426	5.9202	5.03308	3.43415		3.2796	0.0127817	8.53575	5.03118	0.0147434
SLC20A1	119.639	142.496	77.9842	176.83	150.632		489.02	148.182	157.933	292.813	251.701	834.138	274.319		-3.06965	0.0128025	133.516	349.729	0.0147575
DRG2	22.8696	31.4976	29.474	25.7292	32.1959		20.2315	12.8522	21.3469	14.9551	27.0607	16.7715	26.003		3.06571	0.0128114	28.3533	19.8887	0.0147715
CD40	3.98746	9.4552	5.33478	3.89332	4.56131		0.959317	3.48037	3.32082	1.80661	1.80069	5.22118	1.13313		3.03913	0.012824	5.44641	2.53173	0.0147856
VPS28	127.829	132.285	128.344	117.536	168.713		246.315	154.585	174.577	340.786	131.452	210.336	272.55		-3.14449	0.0128489	134.941	218.657	0.0147997
SLC35E2B	11.7276	6.74478	14.5017	11.3096	11.9858		3.29851	4.58109	11.201	7.01252	4.56561	5.48547	8.48526		3.02183	0.0128558	11.2539	6.37564	0.0148138
AHCYL1	129.413	106.705	154.468	122.809	88.2564		85.6816	93.4535	74.9459	97.4175	76.2688	71.3758	77.0169		3.53215	0.0129075	120.33	82.3086	0.0148279
ZNF879	16.5294	10.0348	11.9722	9.64643	9.03983		9.96022	5.49586	6.85553	7.55669	7.27421	8.3532	6.37014		3.26087	0.0129208	11.4445	7.40941	0.0148419
CENPT	2.03398	1.32435	3.01881	1.46947	0.760149		2.50247	4.56504	4.95523	3.16339	4.25305	3.01309	5.20034		-3.55578	0.0129397	1.72135	3.95037	0.014856
MTX2	78.3298	75.0566	88.4527	85.7068	85.4128		48.5954	53.0475	54.0587	64.2832	61.2409	38.1902	94.9828		3.31121	0.0129598	82.5917	59.1998	0.0148701
MYCBPAP	1.54537	1.62438	1.35115	3.38794	1.67001		0.45609	0.970541	2.3133	0.762054	0.828116	0.261285	0.268285		3.09117	0.0129641	1.91577	0.837096	0.0148842
C6orf97	8.16083	6.64116	3.93699	1.88463	1.33875		1.13892	1.77564	1.942	0.813789	0.294935	1.12782	0.311708		3.11741	0.0129778	4.39247	1.05783	0.0148983
SAMD11	7.87039	13.9586	9.81737	10.5068	14.8009		7.18894	1.87845	4.0557	3.60349	7.13529	7.43767	9.69279		3.0966	0.0129988	11.3908	5.85605	0.0149123
RNF19A	50.6608	42.948	53.1786	37.9513	28.6571		88.5826	131.745	38.1547	90.2054	50.3747	103.893	68.0113		-3.03227	0.0130066	42.6792	81.5667	0.0149264
C11orf52	16.407	18.3405	18.0378	40.959	18.8945		7.89396	10.1366	9.89522	10.1832	18.2583	10.7403	12.4751		3.35141	0.0130077	22.5278	11.3689	0.0149405
TBX15	0.960984	1.69766	1.35101	1.02041	1.64046		2.30569	3.81016	4.93286	1.09918	2.52374	5.06256	1.85186		-3.08391	0.0130234	1.3341	3.08372	0.0149546
CCDC126	11.101	7.6273	5.78451	10.1813	5.27649		11.3758	14.2442	10.0822	14.3812	12.3623	13.447	22.2792		-3.27947	0.0130253	7.99412	14.0246	0.0149687
SYTL3	23.955	19.818	26.5684	12.45	11.4311		24.8849	5.9135	5.08648	3.19208	4.89959	11.8016	5.71449		3.03787	0.0130285	18.8445	8.78466	0.0149827
GNE	48.8806	45.1538	66.1677	43.3664	41.0162		38.4956	22.2319	19.0676	15.1879	31.767	36.6704	45.8597		3.09289	0.0130302	48.9169	29.8972	0.0149968
DTYMK	71.6622	95.9744	73.3233	44.1403	95.6008		141.491	134.113	100.221	127.039	102.03	111.719	196.913		-3.30214	0.0130582	76.1402	130.504	0.0150109
ZNF454	6.63487	3.7619	6.83114	2.96464	4.3551		2.57815	1.57677	4.19773	3.725	2.02419	1.42807	2.19159		3.05471	0.0130722	4.90953	2.53164	0.015025
LRRIQ4	4.72193	3.36678	3.43297	2.02881	7.83323		0.621391	0.134944	1.94076	1.61073	0.728997	0.686046	4.07959		3.0919	0.013079	4.27674	1.40035	0.0150391
C2orf3	8.66313	8.15796	13.479	6.55418	8.78257		13.2235	14.7891	10.5928	18.3353	11.3834	16.0986	14.9676		-3.29729	0.0131588	9.12737	14.1986	0.0150532
RNF166	24.9934	27.3292	26.7083	21.0635	26.9752		16.3375	16.0147	17.9472	22.3558	20.4222	21.843	25.4533		3.01354	0.0131689	25.4139	20.0534	0.0150672
SLC2A9	21.7614	37.2669	17.3183	44.9631	18.4305		13.4731	3.48216	14.7454	8.87253	21.746	11.4725	11.3482		3.01128	0.0132003	27.948	12.1628	0.0150813
RHBDD3	34.9806	39.387	40.9629	40.3942	41.9585		20.7051	31.8636	37.902	37.6096	29.9667	21.5505	26.7592		3.24568	0.0132005	39.5366	29.4795	0.0150954
AGPAT1	34.0932	30.5583	49.3332	27.2377	30.4057		56.1053	44.483	55.8739	48.0866	39.2049	43.6022	71.2631		-3.16818	0.0132223	34.3256	51.2313	0.0151095
PGM2L1	0.883485	0.813108	0.387888	1.12171	0.674632		2.09116	1.76339	1.23197	1.01808	1.11041	2.30476	1.26457		-3.22388	0.0132226	0.776165	1.54062	0.0151236
TBC1D1	54.5616	94.3878	54.8264	62.0825	45.1386		26.6932	24.9891	32.8056	20.3607	78.0393	33.2529	34.3013		3.00766	0.0132294	62.1994	35.7774	0.0151377
ZNF212	24.9164	22.3074	20.0532	20.4899	16.4407		17.3768	15.8392	15.2608	10.9481	17.6417	18.5695	11.0667		3.00427	0.0132494	20.8415	15.2433	0.0151517
ATP5G3	387.112	350.558	431.228	266.818	482.43		156.143	193.817	263.392	281.761	320.213	131.905	321.55		3.00707	0.0132851	383.629	238.397	0.0151658
THOC3	49.158	44.9657	49.2003	35.1112	42.618		51.453	55.1742	61.8963	100.405	53.1487	54.4297	102.771		-3.08247	0.0132917	44.2106	68.4683	0.0151799
COX5B	124.458	135.741	155.627	127.432	160.86		106.41	122.967	105.158	118.18	77.1555	80.0002	136.301		3.03277	0.0132959	140.824	106.596	0.015194
LIG3	33.1214	29.1261	34.3687	27.774	23.05		48.65	33.5353	33.5941	37.3253	33.291	48.9198	59.833		-3.00232	0.0133009	29.488	42.1641	0.0152081
LIPH	2.91786	10.3953	5.68748	10.2286	3.42592		20.7916	19.1257	7.21645	15.8112	9.90554	23.2292	89.4939		-3.00396	0.0133265	6.53103	26.5105	0.0152221
YBX2	12.9696	16.9672	4.4733	29.9023	38.0348		5.36388	3.53417	6.42993	4.38373	1.70559	5.52161	2.23483		3.46451	0.0133559	20.4694	4.16768	0.0152362
C6orf70	5.74634	5.74032	5.90407	5.05392	6.31189		10.0931	13.1279	9.63638	10.5387	6.36496	12.1117	4.92638		-3.30988	0.0133692	5.75131	9.54273	0.0152503
CPT1B	26.2096	30.6359	51.5764	39.2965	19.8285		9.81067	13.1984	54.2119	5.7877	12.6601	3.89889	5.91468		3.10192	0.0133697	33.5094	15.0689	0.0152644
TRIO	17.5351	11.6293	15.4107	11.4615	9.14478		18.7038	18.6083	19.0382	16.6997	16.9251	21.7373	30.3901		-3.22682	0.0133927	13.0363	20.3004	0.0152785
BAHD1	30.9627	23.0394	31.4233	28.6324	19.4639		21.5847	18.5312	24.5372	14.1487	12.428	20.7693	13.5357		3.00875	0.0133968	26.7043	17.9335	0.0152925
MANF	127.455	174.961	106.408	185.283	154.796		238.26	143.078	233.575	277.059	184.48	238.009	298.211		-3.05036	0.0134038	149.781	230.382	0.0153066
CEP44	9.89252	10.4584	9.24225	6.74324	11.0325		15.5313	19.9941	17.5566	12.3004	10.4635	9.89711	14.1216		-3.00028	0.0134076	9.47378	14.2664	0.0153207
IRS1	16.6266	7.1157	3.49456	8.91919	3.13797		13.4157	13.7855	45.8112	25.7645	21.1265	21.2685	21.2787		-3.4519	0.0134315	7.8588	23.2072	0.0153348
GNB1	240.305	261.546	220.895	275.479	210.921		157.993	140.145	167.864	191.535	256.118	160.971	218.783		3.029	0.0134682	241.829	184.773	0.0153489
PFKFB2	68.8418	35.1264	57.9666	49.4595	35.7813		9.29999	43.3754	20.7293	44.268	22.1443	9.66844	21.3768		3.06246	0.0134866	49.4351	24.4089	0.015363
HSPA9	60.8239	65.1673	80.5701	76.4918	68.8612		52.5445	71.3333	45.7977	62.056	49.3884	50.6481	60.3558		2.99553	0.0135158	70.3829	56.0177	0.015377
HINFP	45.5604	40.995	48.9027	37.874	39.4312		27.7749	28.9007	32.0416	36.0209	33.2082	24.9394	46.6686		3.03456	0.0135189	42.5527	32.7935	0.0153911
PSMB2	248.864	271.394	262.207	293.327	440.578		181.356	187.026	217.09	259.7	225.073	146.308	196.708		3.21794	0.0135396	303.274	201.894	0.0154052
MYB	39.7233	15.2746	15.0649	8.49024	17.4177		3.52619	14.9325	4.99547	13.8805	3.58513	3.95553	5.33934		3.03071	0.0136217	19.1941	7.17352	0.0154193
DTD1	88.4378	81.0221	101.255	61.6983	83.7875		124.913	115.542	188.609	151.31	82.2679	103.825	109.106		-2.98701	0.0136495	83.2401	125.082	0.0154334
CTBP2	77.223	69.7081	74.2619	67.1902	48.1218		74.9797	133.134	109.079	113.961	85.2692	69.39	102.434		-2.99809	0.0136646	67.301	98.321	0.0154474
GABARAPL1	59.0032	109.506	81.8927	117.393	114.769		120.507	32.4638	35.7126	28.8944	44.9633	70.663	34.1268		3.00394	0.0136998	96.5128	52.4758	0.0154615
TOR1A	46.7871	54.6714	47.1321	48.0395	42.4773		51.7623	55.8589	71.4018	69.6634	52.0319	54.6487	88.0965		-3.07169	0.0137129	47.8215	63.3519	0.0154756
NSUN4	42.913	37.7975	44.6311	25.2985	20.8596		22.3116	11.5557	16.9296	9.82851	20.7031	22.8013	25.7091		3.03659	0.0137296	34.2999	18.5484	0.0154897
GATA5	0.589055	1.49589	0.147972	1.02358	1.90381		3.40674	1e-06	1e-06	1e-06	1e-06	1.9498	1e-06		3.37702	0.0137387	1.03206	0.765221	0.0155038
RELB	55.3968	48.7057	41.1041	60.318	47.6561		36.9877	51.7746	46.9559	28.045	34.9473	29.4085	28.0908		2.99474	0.0137432	50.6361	36.6014	0.0155178
LSM11	6.80351	4.82142	4.69371	5.56374	5.91878		5.77552	19.2024	11.1936	14.0716	5.27376	9.83016	10.7667		-3.17135	0.0137991	5.56023	10.8734	0.0155319
KIAA1797	17.6953	14.5005	15.8823	12.1449	14.2605		4.50986	15.5652	6.4313	9.08952	12.8664	5.35643	9.18994		3.19707	0.0138042	14.8967	9.00124	0.015546
RPS8	2513.54	3302.56	2772.79	2015.56	3999.03		1465.51	2591.44	2297.79	1915.23	1902.06	1138.66	1366.99		3.01946	0.0138134	2920.7	1811.1	0.0155601
TPST1	30.0991	36.6824	19.91	30.4598	31.1876		36.2703	67.2169	39.7412	61.0711	41.9922	37.8135	36.4643		-3.0183	0.0138192	29.6678	45.7956	0.0155742
TIMP2	90.8861	265.737	119.056	208.096	147.581		890.368	324.425	167.177	221.629	303.076	1100.3	1110.67		-3.0121	0.0138218	166.271	588.235	0.0155883
DNAJA2	19.1179	20.0807	21.0161	25.1349	14.4083		12.3049	19.1646	12.8264	9.08603	16.32	10.5597	14.9225		2.98927	0.0138378	19.9516	13.5977	0.0156023
CRADD	67.0541	24.0201	13.5415	32.0981	17.3216		8.03672	8.66391	7.07896	3.9843	15.3297	9.88202	15.856		3.23089	0.0138857	30.8071	9.83309	0.0156164
MAP3K9	7.16078	4.80918	10.9675	8.45577	3.20243		10.2807	19.0391	14.6267	12.4204	14.4219	14.1146	20.5903		-3.5865	0.0138975	6.91913	15.0705	0.0156305
PACRGL	8.26794	6.89108	8.42565	3.91057	5.38474		1.28948	4.84184	4.50835	3.92743	4.26149	2.69541	2.82091		2.97501	0.0139285	6.576	3.47784	0.0156446
RPRD1B	12.829	6.81242	15.6395	9.53421	7.55597		20.2044	19.3238	19.4127	15.9665	10.7237	21.6177	23.39		-3.24741	0.0139388	10.4742	18.6627	0.0156587
LSM14A	124.538	131.731	135.038	105.208	114.382		171.365	162.474	143.677	169.685	130.315	177.157	118.566		-2.97438	0.0139539	122.179	153.32	0.0156727
KIF11	11.8778	8.18714	23.6964	6.64825	3.35487		20.6549	31.6501	23.9407	49.4501	38.9594	19.9324	41.2393		-3.56668	0.0139934	10.7529	32.261	0.0156868
GRIK5	18.8335	9.2277	15.3165	13.8731	11.5335		2.50067	11.0311	1.97262	8.91812	9.66932	2.41544	0.745188		3.23042	0.0140027	13.7569	5.32178	0.0157009
TSPAN14	24.4061	38.1571	43.0235	29.1412	14.2334		106.538	76.731	34.6385	43.3043	33.7672	101.665	110.674		-2.98677	0.0140072	29.7923	72.474	0.015715
ZFAND6	116.791	99.5541	90.2319	80.202	64.3768		53.28	61.8214	63.5476	54.2276	64.0035	47.5015	82.0468		3.2086	0.014009	90.2312	60.9183	0.0157291
NUSAP1	1.48414	3.03384	2.9642	2.93351	3.89746		12.2929	4.51043	3.07054	3.69217	5.86308	6.30145	6.83333		-2.98162	0.0140326	2.86263	6.08056	0.0157432
C3orf75	8.589	8.43296	10.6821	7.24079	7.91803		17.0233	16.8581	11.4803	19.785	7.51739	14.2896	10.1829		-3.07419	0.0140459	8.57258	13.8767	0.0157572
PLEKHG1	23.1468	17.3548	7.84713	21.2616	6.59001		65.1431	23.062	17.6343	24.0219	36.8967	77.5079	76.9248		-3.0275	0.0140757	15.2401	45.8844	0.0157713
ALKBH3	20.1911	29.779	16.5202	16.9234	25.8185		7.11416	8.65262	12.1101	16.0129	11.2447	8.24268	25.5157		2.97988	0.0141406	21.8464	12.699	0.0157854
CTBP1	135.577	105.137	121.566	84.7413	113.224		70.7043	65.0374	84.9922	73.8998	87.8164	61.4379	118.281		2.97724	0.0141536	112.049	80.3099	0.0157995
CCDC51	17.915	19.8503	21.0314	17.1932	23.4648		35.1741	32.3723	29.5221	30.79	17.3316	23.4358	26.2984		-3.0038	0.014185	19.8909	27.8463	0.0158136
NUP155	14.3382	11.4442	13.8514	12.0366	8.42759		14.7303	14.789	16.7695	21.8595	17.5885	13.8136	28.8554		-2.97812	0.014193	12.0196	18.3437	0.0158276
PSMB6	155.316	186.101	183.331	155.493	203.273		109.954	118.041	154.023	167.9	145.809	102.704	156.079		2.97145	0.0142041	176.703	136.359	0.0158417
FAM53C	38.6134	22.5106	29.2434	30.2213	16.7137		13.7447	20.1076	14.4831	18.4285	13.8277	12.3576	15.37		3.48705	0.0142102	27.4605	15.4742	0.0158558
C4orf41	36.1149	34.0994	31.6542	31.6533	32.3895		17.8163	21.799	18.7772	26.5897	40.7382	20.7109	21.8751		3.29048	0.0142146	33.1823	24.0438	0.0158699
OSBPL6	25.0188	14.717	5.17787	29.9604	8.42314		4.02877	4.00752	3.03884	2.1333	5.61393	6.01088	3.51345		3.57545	0.0142396	16.6594	4.04953	0.015884
BTD	133.425	139.246	129.724	177.006	168.818		94.1958	115.278	85.2612	167.542	83.1783	71.0659	120.364		3.01596	0.01424	149.644	105.269	0.0158981
SAMD12	8.91342	5.83758	15.2002	17.5465	5.38646		15.472	19.9746	37.9617	35.2707	20.2909	15.6603	31.2196		-3.27468	0.0142494	10.5768	25.1214	0.0159121
OSBPL2	48.6671	52.5795	47.4797	45.4118	43.9017		94.5918	86.3049	46.3419	53.2143	54.1899	93.3425	78.6621		-3.25805	0.0142811	47.608	72.3782	0.0159262
WDTC1	81.0788	85.4212	91.6019	108.666	95.2503		52.1261	114.621	38.076	41.3901	71.0293	52.0127	58.8804		3.17669	0.0142949	92.4036	61.1622	0.0159403
FUK	17.2353	16.5673	15.1326	10.4268	10.7672		7.60544	11.6986	11.4761	9.97254	9.90413	6.77631	5.3921		2.97892	0.0143051	14.0258	8.97503	0.0159544
DNAJB11	120.479	128.572	102.165	152.05	122.784		230.72	152.601	200.588	209.4	111.255	213.978	376.1		-3.09813	0.014325	125.21	213.52	0.0159685
ESPL1	4.53692	2.67362	6.64381	2.22486	1.62437		10.9051	7.429	4.71883	5.77529	9.37314	10.3771	11.0586		-3.40219	0.0143301	3.54072	8.51958	0.0159825
FOXRED1	38.0143	39.943	57.9322	24.3881	57.4399		15.6425	15.5387	32.5918	29.8457	27.3449	12.6254	27.4627		3.01239	0.0143345	43.5435	23.0074	0.0159966
FAM91A1	27.0977	21.4283	32.4605	30.1885	11.572		35.9809	42.3987	33.0001	99.9576	34.0346	53.1148	133.748		-2.96108	0.0143481	24.5494	61.7478	0.0160107
BRD3	82.9548	57.8579	90.0742	51.4709	59.2898		93.0766	95.3087	116.78	128.093	75.593	89.7073	121.88		-3.18824	0.0143623	68.3295	102.92	0.0160248
ALCAM	240.984	118.737	134.075	238.461	238.847		124.959	88.7999	95.9672	55.7841	108.487	123.849	131.866		3.13826	0.0143642	194.221	104.245	0.0160389
UCN	0.509911	19.1605	12.7269	5.50712	7.17017		1e-06	1e-06	4.68572	1.07652	0.26634	1e-06	1e-06		3.29597	0.0143914	9.01492	0.861226	0.0160529
ATG3	347.814	294.516	79.2646	338.12	169.766		58.6245	72.7045	101.955	56.8147	75.4888	54.0894	99.7596		3.67333	0.0144239	245.896	74.2052	0.016067
RPTOR	16.6836	12.8332	15.2349	14.0517	13.2388		19.7183	15.9665	18.3143	19.7668	13.4154	21.6682	24.985		-2.99051	0.0144348	14.4084	19.1192	0.0160811
TMEM63A	28.3271	38.3213	46.5448	46.7114	30.5273		21.1096	19.1821	19.2369	20.439	46.4464	23.0908	22.8802		2.95707	0.0144597	38.0864	24.6264	0.0160952
HIVEP1	11.8815	9.45516	11.164	12.8863	5.73539		12.0262	17.9239	18.5289	14.8646	19.9861	16.0238	21.9271		-3.35838	0.0145103	10.2245	17.3258	0.0161093
OBSL1	99.433	71.2809	77.1636	35.4941	97.3482		10.7185	8.94635	79.5333	2.152	64.4008	13.589	2.66551		3.17063	0.0145257	76.144	26.0008	0.0161234
DUS2L	13.7307	10.876	15.673	9.09286	13.4001		9.07337	5.93952	13.1734	8.46035	8.32246	5.97311	7.8917		2.96137	0.014534	12.5545	8.40484	0.0161374
TSPYL2	21.9349	19.976	15.1767	14.9406	20.5008		14.8924	8.94763	22.0659	9.68504	7.07798	11.2107	6.7771		3.04721	0.0145403	18.5058	11.5224	0.0161515
FGFR3	12.257	21.0768	22.6124	52.3245	14.3205		122.921	20.987	24.9938	52.4333	134.521	148.944	199.195		-2.95495	0.0145658	24.5182	100.571	0.0161656
ACSM5	28.4392	21.2419	2.49303	22.4318	56.2833		1.86547	0.257763	12.6652	9.26822	2.2088	1.20264	1.05044		2.98501	0.014567	26.1778	4.07408	0.0161797
SLC48A1	46.0727	31.8009	24.7559	58.9041	82.0254		20.0849	25.6	35.6689	26.7772	12.4025	13.8299	12.9927		3.11055	0.0145948	48.7118	21.0509	0.0161938
C1GALT1	29.4748	36.1942	50.2413	55.4764	23.8078		98.7916	58.2357	29.5599	104.499	118.449	138.279	351.439		-3.01746	0.0146219	39.0389	128.465	0.0162078
DHX32	84.727	56.9734	59.3667	69.9533	65.3643		38.0615	76.5525	38.4914	62.5318	33.8374	34.3228	30.787		3.02504	0.014643	67.2769	44.9406	0.0162219
TSC22D1	388.008	421.47	216.707	397.658	389.122		922.843	302.292	574.505	647.13	627.431	1120.08	571.803		-2.94603	0.0146581	362.593	680.869	0.016236
TBRG1	45.3335	50.28	37.946	44.2056	39.6291		28.1429	33.5067	34.4755	28.4807	35.7637	27.0778	48.2465		2.96672	0.0146695	43.4788	33.6705	0.0162501
TXNRD1	44.3949	43.8797	64.2686	50.0534	37.7568		23.4556	31.6947	26.0381	26.8368	30.4068	29.1153	58.778		2.94546	0.0146763	48.0707	32.3322	0.0162642
POU3F1	2.81863	0.414389	0.0984133	0.236412	0.858312		0.167306	1e-06	0.13181	0.106289	1e-06	1e-06	1e-06		3.26713	0.0146861	0.885231	0.0579156	0.0162783
FAM13C	27.868	14.4825	16.5387	7.50082	8.61371		5.17701	12.9094	8.78465	2.00178	4.32602	5.18421	2.28711		2.95476	0.0146943	15.0007	5.81003	0.0162923
RBM7	14.6153	18.7546	20.7268	14.0439	14.857		10.7784	16.7189	11.0199	9.66725	12.5711	11.5019	13.2099		3.0167	0.0147302	16.5995	12.2096	0.0163064
TES	186.987	199.626	234.887	201.752	106.828		227.725	439.627	219.15	369.506	408.531	236.936	827.123		-2.94604	0.0147329	186.016	389.8	0.0163205
LPPR4	0.734036	0.103727	0.789134	0.116783	1.42711		1e-06	1e-06	0.0840267	0.282101	0.059587	1e-06	1e-06		3.27376	0.0147409	0.634158	0.060817	0.0163346
DVL1	36.512	28.8027	31.6622	23.4044	29.8084		17.0048	27.1601	24.5575	21.9881	27.8801	15.0673	16.7521		2.9444	0.0147438	30.0379	21.4871	0.0163487
ST6GAL1	258.641	271.057	198.189	512.004	187.339		113.583	98.0257	150.967	230.023	153.596	153.52	46.9085		2.95295	0.0147578	285.446	135.232	0.0163627
UACA	28.2274	53.429	44.1549	43.1848	29.2669		109.889	33.756	70.1415	43.0533	145.141	122.732	102.68		-2.98847	0.0147796	39.6526	89.6275	0.0163768
XKRX	0.983028	0.177369	0.201214	0.37037	0.203962		0.836341	0.836266	1.9704	1.90171	0.568066	1.56958	0.515849		-3.1658	0.0147822	0.387189	1.17117	0.0163909
RASGRP1	1.82937	9.12117	5.3172	12.3615	3.77309		63.1791	10.6704	4.9851	12.1097	49.207	100.068	33.1711		-2.93919	0.0148062	6.48047	39.0558	0.016405
GIPR	0.294854	1e-06	1e-06	1e-06	1e-06		1.01342	0.199662	1.08103	0.103385	0.208068	0.328024	0.3389		-4.0227	0.0148195	0.0589716	0.467498	0.0164191
IL1RL1	9.84781	38.4273	40.7858	36.2844	71.9511		1.94951	8.38943	9.25133	1.01792	69.811	3.18812	3.81923		2.96948	0.014857	39.4593	13.9181	0.0164332
NR6A1	2.10614	2.77981	2.41481	2.46198	1.85718		2.34433	5.07013	3.38122	3.67624	2.26868	3.70613	4.46735		-2.97405	0.0149983	2.32398	3.55915	0.0164472
EIF6	96.286	114.602	121.372	95.1851	131.065		130.583	139.979	160.274	170.748	118.466	122.557	171.226		-2.97842	0.0150199	111.702	144.833	0.0164613
FKBP5	118.448	84.8227	40.3898	69.3986	140.332		31.7938	43.9552	11.5138	44.9978	29.8683	36.6305	66.369		2.97128	0.0150207	90.6782	37.8755	0.0164754
DDR2	25.537	22.5998	39.6057	18.5561	33.8763		13.3832	15.0588	15.9087	8.01774	19.8914	20.3086	3.62239		2.98117	0.0150367	28.035	13.7416	0.0164895
LIAS	10.2667	8.99728	8.82906	9.5273	8.34771		4.6815	7.75871	7.95265	8.30471	8.44457	5.06918	5.70615		3.13294	0.0150417	9.19361	6.84535	0.0165036
CENPO	6.84842	3.65552	9.82684	3.01045	3.46271		11.4458	7.33345	14.5386	13.0589	9.14697	8.93519	18.2999		-3.32783	0.0150784	5.36079	11.8227	0.0165176
MRP63	141.774	135.256	153.239	127.259	155.283		163.228	155.172	176.201	255.849	149.165	183.302	193.327		-2.99908	0.0150856	142.562	182.321	0.0165317
PGM2	39.1454	60.9243	51.5792	66.1637	54.3882		31.8442	36.5093	32.7063	30.5766	64.7267	34.8609	30.5701		2.9323	0.0151067	54.4402	37.3992	0.0165458
FLOT2	48.5896	67.9489	78.3007	49.7927	58.6103		90.7682	77.2759	93.6725	95.0237	85.2012	79.7528	70.2092		-3.42364	0.015128	60.6484	84.5576	0.0165599
HEPACAM	16.3355	0.962927	2.16184	1.94694	16.2914		1e-06	0.199335	0.152479	0.454307	0.112861	1e-06	1e-06		3.24643	0.015131	7.53972	0.131284	0.016574
IFT52	35.8932	23.9958	24.8011	21.9588	26.1739		43.9203	31.2148	47.3632	33.7738	31.7199	41.7924	29.4928		-3.00386	0.0151759	26.5646	37.0396	0.016588
INTU	2.91044	1.71537	3.6723	2.59988	1.9754		2.66225	3.02183	6.95878	6.55114	4.1262	4.15321	4.91075		-2.9482	0.0151827	2.57468	4.62631	0.0166021
SLC5A8	1.54902	6.47576	15.8395	6.31944	6.00929		0.37829	2.40641	2.42705	1.56171	1.0894	0.10369	2.7744		2.92343	0.0152121	7.2386	1.53442	0.0166162
C16orf93	10.5488	7.72477	11.2793	11.2443	10.2389		1.23174	10.2474	10.6263	3.60486	3.65273	2.16052	1.6581		3.25759	0.0152158	10.2072	4.74024	0.0166303
MYLK3	3.61484	0.356528	0.400218	1.57682	0.134447		1e-06	0.373388	0.282666	1e-06	1e-06	1e-06	0.0564375		3.24165	0.0152261	1.21657	0.101785	0.0166444
FBXO32	76.2847	38.4921	70.5588	38.9767	30.7037		59.2199	136.028	138.626	533.386	59.0667	93.1436	295.805		-2.97418	0.0152269	51.0032	187.897	0.0166585
FGFR1	294.982	345.59	333.035	279.359	167.925		106.141	158.077	285.132	162.225	180.877	100.555	47.8993		2.96449	0.0152276	284.178	148.701	0.0166725
CDKN1A	20.8319	56.2679	44.4627	88.0514	66.9406		93.7269	73.3323	99.64	85.3014	289.132	201.378	173.013		-3.03471	0.0152609	55.3109	145.075	0.0166866
CLDN10	12.8227	12.4832	67.7134	4.08011	25.2982		5.77425	1.28392	3.26785	2.36188	11.1327	3.0715	0.407601		2.99143	0.0152968	24.4795	3.89996	0.0167007
WDR73	26.0758	25.0004	34.3865	22.8116	23.2065		15.5756	13.6776	22.6257	13.3577	24.6778	16.3604	23.8601		2.92517	0.0153166	26.2962	18.5907	0.0167148
VIPAR	5.10137	2.45694	6.529	2.57276	2.12334		7.32392	10.8947	6.19621	10.1599	5.09739	7.11788	9.90038		-3.38243	0.01536	3.75668	8.09863	0.0167289
YRDC	28.5905	34.1861	31.9257	28.0576	67.9449		13.2927	20.0685	22.6645	20.3774	25.8409	11.223	26.4455		3.05659	0.0153621	38.141	19.9875	0.0167429
SLC7A6	3.11385	3.98233	3.55787	3.15321	3.58288		4.14193	3.68422	12.088	8.2783	5.97008	6.25987	4.326		-3.19389	0.015363	3.47803	6.39263	0.016757
TMEM127	64.7245	76.9417	79.6002	89.4364	57.586		100.821	114.162	85.0882	97.1295	80.5365	108.825	100.807		-3.20498	0.0153706	73.6578	98.1956	0.0167711
CYP2F1	0.330175	0.306376	0.333951	0.344503	0.683563		1.23093	1.50045	1.14963	3.07226	0.619496	0.555117	18.3764		-3.15334	0.0154094	0.399714	3.78633	0.0167852
VWA5B2	3.37829	2.90974	2.57063	2.05396	3.42609		7.18621	4.61559	4.71204	5.61263	2.03535	6.72827	9.62932		-3.00893	0.0154121	2.86774	5.78849	0.0167993
GATAD1	22.3495	21.9584	30.4876	14.1838	17.9408		33.6179	33.4049	27.1498	31.2992	28.6643	35.925	46.2688		-3.32208	0.0154176	21.384	33.7614	0.0168134
B4GALT5	53.7992	58.3854	37.0671	42.511	20.6423		194.223	77.5519	42.0846	68.6252	58.8267	251.23	221.15		-2.93403	0.0154257	42.481	130.527	0.0168274
CHRNA5	0.213846	0.374924	2.27599	3.10007	3.40385		9.83382	15.9086	4.76896	27.9635	2.74211	6.22269	27.0503		-3.23704	0.015442	1.87374	13.4986	0.0168415
CDK5R1	1.44457	1.21089	1.31824	1.09882	0.534776		1.16281	2.87817	8.72234	4.2631	6.09125	1.59954	1.4669		-2.9553	0.0154462	1.12146	3.74059	0.0168556
MAB21L3	1.83543	11.898	15.251	15.0814	13.6034		0.629743	1.22998	4.64467	3.81622	6.41223	1.3349	0.372958		2.93752	0.0155212	11.5338	2.63439	0.0168697
RPP30	7.3725	6.16862	8.84762	4.28074	4.19928		9.77274	16.4617	9.85244	16.827	8.92277	7.3706	8.19083		-2.99496	0.0155504	6.17375	11.0569	0.0168838
MBOAT7	90.3799	86.8127	106.134	86.9178	93.7507		137.037	149.03	97.4143	139.284	85.8064	113.667	141.617		-3.0367	0.0155565	92.799	123.408	0.0168978
BUD31	126.651	131.622	132.106	101.489	132.09		167.546	154.615	185.087	222.294	122.461	144.198	148.216		-2.92147	0.0155594	124.792	163.488	0.0169119
PNP	660.524	1122.1	1022.28	959.223	1133.48		624.672	1072.56	452.973	364.214	749.651	482.204	627.684		2.91515	0.0155914	979.521	624.851	0.016926
NOC4L	11.4864	8.53248	7.62068	9.02451	8.40688		10.7317	8.89548	13.7777	18.6214	12.998	10.3126	15.3059		-2.91777	0.0155976	9.01419	12.949	0.0169401
FAM129B	123.835	188.906	175.434	145.457	174.184		246.884	308.15	156.879	167.008	323.579	276.041	222.077		-2.91738	0.0156221	161.563	242.945	0.0169542
RNF180	15.9476	21.482	13.4523	9.97541	13.8884		3.16373	9.17823	7.45011	12.1033	6.36058	1.33984	7.7879		3.05121	0.0156286	14.9491	6.7691	0.0169683
GPR162	12.4668	5.28745	7.10074	2.16627	24.6963		0.911429	3.82225	2.06696	3.88731	2.50196	0.776592	0.431998		3.02405	0.0156391	10.3435	2.05693	0.0169823
CREB3L4	6.53223	8.8102	5.21782	4.93437	28.0419		2.41523	2.51765	7.62777	2.88349	1.76286	1.73175	1.72428		3.17096	0.0156528	10.7073	2.95186	0.0169964
AHNAK	28.6632	50.2127	46.4256	40.0488	54.4653		14.4043	25.7617	30.4044	11.3007	50.3464	25.3283	16.9885		2.95279	0.0156886	43.9631	24.9335	0.0170105
ARL10	8.86152	10.7135	9.96828	4.52016	5.35403		12.7908	10.1745	20.549	13.5491	14.5192	12.503	18.0712		-3.31433	0.0157075	7.8835	14.5938	0.0170246
GNG2	64.1014	33.2754	35.5753	50.3957	46.4558		11.1644	26.4432	19.556	18.8901	44.2845	22.2936	3.95255		3.06735	0.0157104	45.9607	20.9406	0.0170386
NFS1	27.1206	26.5888	32.5493	24.795	23.1708		31.7311	30.1777	40.6563	55.311	29.0369	31.9972	49.0282		-2.95359	0.015724	26.8449	38.2769	0.0170527
SF3A1	154.449	154.875	141.793	113.276	146.307		94.5462	136.144	124.523	92.2683	131.868	78.9313	100.364		2.90927	0.0157415	142.14	108.378	0.0170668
ATHL1	15.1858	12.6457	19.0306	11.6662	10.545		4.93045	9.24189	11.8431	6.54523	9.73836	4.79281	12.2083		2.91417	0.0157637	13.8147	8.47145	0.0170809
PFKM	30.776	25.656	36.5593	15.2965	29.3388		17.5473	9.12856	19.2532	16.8577	16.5477	13.1852	16.5362		3.14388	0.0157732	27.5253	15.5794	0.017095
CCDC59	27.6494	23.2816	19.8852	28.6458	27.6189		17.8987	12.7391	20.2228	20.3357	21.3337	16.2762	23.6896		2.90581	0.0157865	25.4162	18.928	0.0171091
C20orf4	31.0939	29.1784	34.6105	22.4947	21.9066		47.3701	35.7121	49.6373	46.424	23.052	44.3624	47.859		-2.90172	0.0158486	27.8568	42.0596	0.0171231
TAX1BP3	143.673	164.061	121.801	136.915	150.139		161.669	157.616	170.885	159.134	192.334	175.059	186.344		-3.19198	0.0158673	143.318	171.863	0.0171372
IVD	72.4371	60.4169	55.786	89.6172	99.3881		82.426	32.2109	23.3709	17.3956	47.0212	58.2332	33.3095		2.96806	0.0158784	75.5291	41.9953	0.0171513
ISCU	41.6478	56.9306	62.8417	42.9396	61.1592		34.4895	32.6529	51.4143	52.008	23.5085	23.3118	20.5158		2.93386	0.0159176	53.1038	33.9858	0.0171654
ZNF367	5.91768	2.76247	7.73104	1.54036	2.83641		8.97693	14.046	10.5441	14.1983	9.63908	9.66574	10.3118		-3.77576	0.0159183	4.15759	11.0546	0.0171795
ABCD1	12.4392	11.5447	16.9293	13.2717	14.756		12.2122	8.77712	12.2764	5.42443	8.58838	11.2736	9.50272		2.9317	0.0159301	13.7882	9.72212	0.0171935
SLC25A12	59.7744	47.8703	42.2483	25.0333	27.3248		16.5169	15.5107	27.4558	22.9112	25.4551	14.6623	26.631		3.15888	0.015954	40.4502	21.3061	0.0172076
GPATCH3	12.9776	14.8893	15.2959	11.5324	12.6261		9.03881	14.2289	12.2907	9.43688	9.09646	9.40597	10.8652		2.89224	0.0160554	13.4643	10.6233	0.0172217
C11orf63	4.68494	3.49232	2.73971	2.49148	3.62505		1.36472	0.826918	0.256286	0.460853	3.04574	3.20839	1.06626		3.13305	0.0160617	3.4067	1.46131	0.0172358
ME2	40.7348	64.0361	49.2917	47.0003	31.6939		72.3396	85.747	54.9562	112.847	79.5529	62.7504	50.7641		-2.94579	0.0160916	46.5514	74.1367	0.0172499
GPR143	8.18362	4.46184	11.9014	5.1875	3.82646		1.17703	3.26194	3.03646	4.20068	2.58575	2.13673	4.28281		2.99144	0.0161174	6.71216	2.95449	0.017264
BRP44	71.2123	45.3126	66.1872	66.1099	109.611		29.7808	52.2135	51.3628	64.0708	33.3923	16.7571	26.2604		2.89006	0.0161186	71.6866	39.1197	0.017278
ATAD3A	25.6084	21.004	31.9221	13.5595	20.4528		10.442	13.5427	11.2826	14.3777	14.7533	11.9963	12.8071		3.58678	0.0161247	22.5094	12.7431	0.0172921
NUDT12	52.0579	31.9739	57.6902	35.5828	21.6034		11.5202	18.4927	24.9038	23.8466	22.6622	12.8631	26.702		3.05798	0.0161377	39.7816	20.1415	0.0173062
C9orf40	4.3066	3.80381	6.47954	2.70323	5.20759		5.34234	7.51337	4.92875	13.4168	6.88032	10.6075	8.86679		-2.93641	0.0161383	4.50015	8.22227	0.0173203
RNF220	29.2489	31.3846	29.4857	23.7651	31.0036		22.5919	19.4728	24.9067	18.6367	21.4474	20.9057	32.082		2.89518	0.0161527	28.9776	22.8633	0.0173344
WNT7B	3.36389	17.6559	3.30458	29.7284	3.83531		145.335	23.9288	11.7787	11.6066	71.2623	148.34	129.302		-2.93012	0.0161539	11.5776	77.3648	0.0173485
C3orf21	54.0281	66.2684	49.8769	75.3833	64.3279		40.0878	34.9498	74.7009	39.0407	45.2852	40.8715	36.553		2.8898	0.0161759	61.9769	44.4984	0.0173625
CYP3A7	0.56963	1.13598	0.568508	0.503016	1e-06		1e-06	1e-06	1e-06	1e-06	1e-06	1e-06	1e-06		3.99426	0.0162073	0.555427	1e-06	0.0173766
CHID1	101.419	66.542	80.7949	87.5133	113.058		44.3751	45.5376	64.7231	54.3881	53.0621	41.4258	111.404		2.89399	0.0162313	89.8654	59.2737	0.0173907
DBC1	7.99939	13.8619	22.5639	42.7592	11.1629		0.226036	8.74759	0.788188	23.388	5.16957	0.286857	0.133731		3.06784	0.0162944	19.6695	5.53428	0.0174048
RTN4	380.644	424.01	450.253	371.458	282.431		340.571	309.145	248.574	219.336	298.847	280.968	276.261		3.07963	0.0163346	381.759	281.957	0.0174189
TMEM220	8.14813	5.58307	28.773	9.95947	13.4687		1.20458	1.92326	5.82019	5.20242	5.16518	2.74845	8.86181		2.91482	0.0163456	13.1865	4.41798	0.0174329
C5orf49	1.88305	0.671635	0.390758	1e-06	0.750552		1e-06	1e-06	1e-06	1e-06	1e-06	1e-06	1e-06		3.98275	0.0163635	0.739199	1e-06	0.017447
GNG11	7.05465	22.5847	8.8259	19.2768	11.7527		38.5448	12.8172	35.7051	19.992	31.9552	35.7484	45.1514		-3.019	0.0163751	13.8989	31.4163	0.0174611
RHOT2	32.6777	33.3286	44.845	18.8565	23.4766		15.5168	23.209	27.1096	17.8981	13.3792	11.7963	11.5537		2.96818	0.0163931	30.6369	17.209	0.0174752
MGAT5	9.33848	6.45265	7.86017	10.8555	4.08237		13.0301	9.23138	11.6995	14.6647	10.7355	22.8645	19.053		-3.04848	0.0164047	7.71783	14.4684	0.0174893
WDR34	16.2424	11.8331	15.9222	10.3963	10.4064		18.3994	21.408	19.9937	19.2658	17.0418	13.788	19.2673		-3.23096	0.0164696	12.9601	18.452	0.0175033
TUBGCP3	22.0773	15.5547	23.993	15.7144	11.737		31.5739	16.857	25.2212	44.6366	23.6868	38.1406	31.9472		-2.91495	0.0165	17.8153	30.2948	0.0175174
NME9	1.47314	0.257324	0.29871	1e-06	0.601349		1e-06	1e-06	1e-06	1e-06	1e-06	1e-06	1e-06		3.97269	0.0165015	0.526105	1e-06	0.0175315
WHSC2	29.5983	30.7719	34.3848	23.8205	23.6276		20.7827	19.904	18.9064	13.3284	25.3051	19.1844	27.3778		2.87508	0.0165372	28.4406	20.6841	0.0175456
SYNRG	21.5281	17.9294	20.9192	21.9193	16.8845		14.5897	16.8224	17.4492	11.8502	13.458	15.406	20.1172		2.87498	0.0165377	19.8361	15.6704	0.0175597
FZD2	14.0452	66.434	31.5616	57.1744	28.5821		167.442	49.4995	81.0769	45.6128	158.147	251.895	91.9751		-2.93872	0.0165437	39.5595	120.807	0.0175737
USP53	39.402	21.1638	42.3548	26.7558	42.0244		23.515	27.3656	10.9444	10.5826	22.1064	27.2207	13.2364		2.87637	0.0165576	34.3402	19.2816	0.0175878
KRT23	0.374165	1.78284	1.24016	2.79676	1.32306		3.29681	18.5813	1.9354	4.09117	5.18981	2.62484	5.81421		-2.96232	0.0166054	1.5034	5.93336	0.0176019
C8orf40	40.5361	37.0112	49.0616	25.496	39.8363		24.7289	25.7416	20.2556	27.5988	34.1798	22.1127	10.0342		2.87736	0.0166346	38.3882	23.5217	0.017616
HEXA	130.928	100.499	69.7285	179.687	138.053		83.8238	46.0613	59.0092	44.0555	70.6095	87.6111	79.4451		3.08279	0.0166368	123.779	67.2308	0.0176301
FAM184B	10.4583	5.78845	2.46683	7.37292	6.34005		2.44818	1.08027	4.12383	2.15747	3.98026	2.20239	2.26967		3.04218	0.0166644	6.48531	2.60887	0.0176442
MC2R	2.92527	0.25847	1e-06	0.849397	1.17085		1e-06	1e-06	1e-06	1e-06	1e-06	1e-06	1e-06		3.9607	0.0166679	1.0408	1e-06	0.0176582
GSTM4	40.9883	29.8181	64.2147	30.32	46.9074		19.8068	14.5747	41.2697	34.3676	18.2842	11.7608	24.2236		2.87005	0.0166871	42.4497	23.4696	0.0176723
RAD1	23.1845	14.9118	14.6489	8.063	11.8467		26.1115	23.4429	27.4407	26.925	21.2703	26.2944	33.6463		-3.60186	0.0166985	14.531	26.4473	0.0176864
TFDP1	32.0828	20.7814	28.8665	17.6167	21.4257		38.8302	20.4108	34.1807	46.1601	39.4911	38.1872	53.4681		-2.8836	0.0167448	24.1546	38.6755	0.0177005
PLBD2	95.8603	129.618	217.221	212.376	127.991		65.7751	92.8511	135.163	87.5398	58.7884	70.3626	89.4882		3.0862	0.0167521	156.613	85.7097	0.0177146
HEPN1	3.22602	1e-06	1.1056	2.1747	18.0345		1e-06	1e-06	1e-06	1e-06	1e-06	1e-06	1e-06		3.95393	0.0167627	4.90816	1e-06	0.0177286
IRX5	88.7769	94.7105	83.741	68.9875	64.947		29.2198	78.9539	90.3464	27.3916	42.9024	19.5285	30.1993		3.08269	0.0168371	80.2326	45.506	0.0177427
RIOK2	24.6708	27.9227	30.8563	22.768	24.1829		18.7863	21.5253	21.3902	15.488	28.2344	17.4972	19.386		2.86645	0.0168416	26.0801	20.3296	0.0177568
AAMP	98.4749	93.65	126.602	105.612	112.347		88.8481	70.3321	99.0604	61.9454	81.2679	79.2481	107.042		2.86823	0.016885	107.337	83.9634	0.0177709
EIF4A2	399.423	388.902	394.701	297.308	282.634		594.825	420.244	501.089	380.98	387.401	500.259	752.797		-2.86216	0.0168943	352.594	505.371	0.017785
RBM18	25.355	29.5976	34.3511	24.2778	23.9212		26.6848	38.3036	31.6383	44.1366	35.0781	35.8102	43.8522		-2.89163	0.016903	27.5005	36.5005	0.0177991
ATP2B1	55.376	51.4283	46.7403	91.588	54.838		15.9319	31.0673	26.7184	39.9962	70.5332	26.2414	35.0279		2.87655	0.0169357	59.9941	35.0738	0.0178131
DHX37	33.4852	23.632	26.5552	23.9098	17.3726		30.3231	44.0027	38.4065	50.8025	31.5242	29.0039	34.9734		-3.00599	0.0169715	24.991	37.0052	0.0178272
GOLGB1	80.5321	45.9121	75.5152	65.0632	42.6217		29.5884	29.0581	45.8168	35.3597	47.8971	35.4761	42.8068		3.15034	0.0169958	61.9289	38.0004	0.0178413
STEAP2	105.075	21.2746	8.21718	38.2771	12.5769		2.91539	6.57052	3.13161	6.45239	2.85328	4.31327	11.8021		3.34401	0.0170224	37.0842	5.43408	0.0178554
CCT6B	1.55362	1.77656	1.66326	1.17178	1.43803		0.558206	1.24813	1.02834	0.882119	1.50592	0.645574	1.19645		2.93644	0.0170358	1.52065	1.00925	0.0178695
H3F3B	580.741	763.349	605.754	577.046	518.918		1133.78	1095.32	812.128	645.128	664.689	873.93	686.637		-2.86277	0.0170841	609.162	844.516	0.0178836
AMOTL2	20.6198	21.3734	34.1511	21.5074	17.8757		30.768	50.6514	43.2535	19.0126	42.002	43.5048	92.7985		-2.89714	0.0171012	23.1055	45.9987	0.0178976
AMDHD2	34.6471	39.2328	25.7405	38.3961	40.1076		23.5005	35.9012	33.3533	21.9622	19.7872	23.92	19.2582		2.85758	0.0171393	35.6248	25.3832	0.0179117
ANK1	1.41905	1.2493	0.550082	1.21926	1.31215		0.467005	0.499696	1.19548	0.253288	0.161499	0.89344	0.308891		2.87647	0.0171526	1.14997	0.5399	0.0179258
UQCRH	231.872	207.69	368.133	140.25	273.451		78.9174	100.924	192.23	184.214	151.753	87.744	136.069		2.93093	0.0171615	244.279	133.122	0.0179399
RGS20	1.87732	0.637169	2.23941	0.356301	4.09134		1e-06	1e-06	0.248182	1e-06	0.366366	1e-06	0.879874		3.2035	0.0171639	1.84031	0.213489	0.0179539
DNAJB5	42.7495	10.6303	16.1887	19.209	14.2899		1.9534	11.6342	8.76647	16.3868	7.26615	2.08071	5.89237		2.85555	0.0171733	20.6135	7.71144	0.017968
ATP5J2-PTCD1	4.14798	2.54167	5.90996	3.21348	13.7679		14.1518	13.999	36.3518	10.9908	12.8132	7.76308	15.623		-3.12538	0.0172046	5.9162	15.9561	0.0179821
ZNF747	9.82371	8.8908	13.8781	6.58371	5.13157		3.52311	7.99932	3.13474	2.71662	6.39646	4.54213	4.13523		2.92444	0.0172075	8.86158	4.63537	0.0179962
CKAP2	22.9268	18.1464	31.6971	12.4516	12.6657		34.4123	41.2946	34.7812	42.7377	29.3347	31.8877	38.7199		-3.60939	0.0172166	19.5775	36.1669	0.0180103
PIK3CA	14.2986	14.7058	18.3576	15.6201	12.186		21.7749	24.9342	14.8579	22.1428	16.7279	32.7681	45.0454		-2.97072	0.0172257	15.0336	25.4645	0.0180244
NME1	59.782	39.9064	64.3247	71.7675	97.4114		88.2157	105.005	104.865	290.093	103.214	78.3088	167.902		-2.85125	0.0172321	66.6384	133.943	0.0180384
WARS2	13.9737	16.4927	17.7909	10.3656	11.7756		7.56353	8.08205	11.5704	6.00782	7.47984	11.686	13.0008		2.85816	0.0172363	14.0797	9.34149	0.0180525
VMP1	53.1627	63.8546	56.2377	86.2074	47.8031		96.786	69.9272	74.8687	95.0262	66.9846	120.158	115.837		-2.90748	0.017306	61.4531	91.3697	0.0180666
C5orf28	7.30599	10.23	10.499	12.2002	5.16731		35.331	17.6654	10.5592	27.3144	9.27579	35.3135	12.5124		-2.85544	0.0173208	9.0805	21.1388	0.0180807
SLC16A6	15.1252	9.31571	5.53667	20.2988	4.13239		1.62112	6.0396	7.26488	4.95492	2.37739	1.24572	1.33693		2.88328	0.0173495	10.8818	3.54865	0.0180948
STIL	2.59631	1.73139	3.90367	1.27646	1.40075		3.77067	4.33924	3.14246	3.12452	5.4921	3.55295	7.98045		-3.09828	0.0174611	2.18172	4.48606	0.0181088
EPHA3	0.231688	1.39499	4.21685	0.597981	1.24802		6.34851	15.2179	1.07054	5.08695	4.98151	10.9822	7.90468		-3.03885	0.0177019	1.53791	7.37033	0.0181229
KLKB1	77.9316	33.7085	1.81704	58.4222	24.7387		5.7314	5.57909	3.27027	2.16198	0.277809	2.66256	0.939244		3.09954	0.0177221	39.3236	2.94605	0.018137
ZNF511	56.9254	52.1469	41.3033	41.341	50.3719		26.2008	27.1897	54.961	40.6784	38.1448	30.4044	26.0486		2.87386	0.0177232	48.4177	34.804	0.0181511
CSN2	77.0463	558.657	24.7966	1.19373	9.73939		1e-06	0.33498	10.7375	1.53935	1e-06	0.23458	1e-06		3.02774	0.0177283	134.287	1.8352	0.0181652
SART1	46.7205	53.451	51.7628	42.0494	64.2646		34.24	31.1139	35.0334	23.57	43.7068	32.197	57.5839		2.85266	0.0177352	51.6497	36.7779	0.0181793
PCBD2	38.7406	32.4406	38.9352	56.0195	51.9973		28.3598	32.7256	27.4367	35.2352	36.9045	25.5976	23.1469		3.06252	0.0177448	43.6266	29.9152	0.0181933
CHST12	24.959	33.7518	28.95	24.5461	27.5722		34.2952	44.3945	50.4948	40.109	32.4372	31.0492	28.4134		-2.83913	0.017746	27.9558	37.3133	0.0182074
CPLX1	10.0768	10.0068	45.1757	7.33274	15.5074		3.61622	6.26826	12.1769	0.87698	4.52233	2.4034	5.10736		2.85999	0.0177726	17.6199	4.99592	0.0182215
CLOCK	7.04497	3.37374	8.36469	5.26143	3.9844		7.46471	9.51972	7.66808	34.591	7.86722	14.2701	11.0228		-2.83246	0.0177773	5.60585	13.2005	0.0182356
TRA2B	29.9939	26.1701	28.0063	20.5435	22.6379		32.9054	40.8735	32.8766	32.8849	27.102	30.5468	31.7962		-3.03482	0.0177783	25.4703	32.7122	0.0182497
SLC36A1	8.96454	6.61328	13.0269	10.3239	5.18518		9.31351	12.2889	23.1154	16.3104	13.6554	14.609	23.8331		-2.94527	0.0177888	8.82276	16.1608	0.0182637
ZBTB12	33.3476	26.0897	39.1156	13.5771	19.2654		42.4677	51.6874	68.4536	43.1791	31.0133	40.631	85.3675		-3.02266	0.0178207	26.2791	51.8285	0.0182778
SMG8	17.7138	16.4059	18.971	12.5957	12.1269		22.0272	19.2586	23.9169	31.8367	13.7738	25.548	25.3438		-2.83647	0.0178349	15.5627	23.1007	0.0182919
E2F8	3.3927	1.85197	7.41333	1.42339	1.9242		8.608	6.68064	4.20061	5.87979	9.00769	6.43934	18.8662		-3.09892	0.0178406	3.20112	8.52604	0.018306
STK3	24.0718	24.2406	20.5386	24.2737	19.0558		32.9992	31.0865	28.9106	60.6549	21.2063	36.5476	29.9801		-2.9749	0.017863	22.4361	34.4836	0.0183201
PHF21A	24.9988	16.5537	19.0521	14.5301	18.2145		10.0363	11.0051	17.5306	15.5507	14.0713	12.368	12.4819		2.92079	0.0179199	18.6698	13.292	0.0183342
TSSC4	60.6036	57.4869	67.7985	50.8618	80.2996		35.2259	33.5051	57.1124	45.7898	43.2647	32.2621	66.571		2.83241	0.0179261	63.4101	44.8187	0.0183482
AURKA	0.388923	0.872969	0.393452	0.189042	0.407884		2.44999	1.65563	1.28953	0.617813	0.631806	0.765313	0.673354		-2.89829	0.0180011	0.450454	1.15478	0.0183623
ATP6V1G3	0.630061	1.53808	67.495	1e-06	2.46192		1e-06	1e-06	1e-06	1e-06	1e-06	1e-06	1e-06		3.86942	0.0180024	14.425	1e-06	0.0183764
TTLL11	15.7824	17.9319	11.3146	13.2742	16.2956		5.94918	9.43819	11.0721	19.57	7.53601	6.47691	7.23502		2.90034	0.0180045	14.9197	9.61106	0.0183905
C17orf59	7.60196	13.219	15.6152	11.9023	12.5662		5.91911	10.5902	6.26139	6.29799	8.40923	6.97065	10.1351		2.95345	0.0180581	12.1809	7.79767	0.0184046
DEDD2	13.843	17.1658	14.0793	14.0506	15.9831		19.8485	23.7919	27.366	26.1105	16.4485	18.3186	13.9733		-2.94341	0.0180609	15.0244	20.8368	0.0184186
CPSF3L	39.427	35.3485	37.5987	27.215	30.5847		21.4812	22.7227	25.0309	24.7434	28.5022	18.8959	36.9732		2.82336	0.0180673	34.0348	25.4785	0.0184327
RAB30	9.08532	11.3831	7.89569	8.15501	5.74787		3.32437	6.089	4.13333	3.17005	5.73997	3.32243	10.214		2.83733	0.0181252	8.4534	5.14188	0.0184468
DSEL	6.2611	7.93248	8.02378	5.7591	4.80523		8.32626	16.6992	11.7119	12.0713	7.11917	10.9265	6.69604		-2.82127	0.0181375	6.55634	10.5072	0.0184609
SACS	3.45208	1.92045	2.9867	2.00629	2.68223		2.16563	3.50533	6.55531	5.40215	4.23989	3.99017	4.85381		-2.8184	0.0182298	2.60955	4.38747	0.018475
OSGIN1	5.09705	4.97292	4.90983	5.67961	30.2262		1.60691	1.96797	2.74717	2.05713	1.89674	1.41591	2.18535		3.65452	0.0182396	10.1771	1.98245	0.018489
WNT11	0.580713	3.15955	1.35556	1.2448	2.02671		5.18184	8.1894	2.42695	2.26417	23.8536	2.67422	3.90518		-2.82007	0.0182565	1.67347	6.92791	0.0185031
NUP133	25.952	19.5755	20.3428	16.0422	13.9941		27.3538	24.5835	31.0234	33.5632	19.1082	28.9577	31.1408		-3.00645	0.0182581	19.1813	27.9615	0.0185172
CFDP1	163.736	141.628	135.751	102.024	194.989		83.1569	101.166	116.979	102.849	103.145	81.2419	102.887		3.26932	0.0184102	147.626	98.775	0.0185313
ADAMTS12	3.35267	3.14784	3.71526	2.86728	1.46449		4.86701	5.31761	10.5734	4.65019	7.20717	9.09487	2.27411		-2.81226	0.0184378	2.90951	6.28348	0.0185454
CHTF18	5.45979	3.43063	6.0333	3.19452	3.24348		4.98085	7.38899	10.9219	12.021	7.86036	4.44148	5.92028		-2.82659	0.0184433	4.27234	7.64784	0.0185595
KCNQ4	2.07055	1.60484	1.76793	1.68287	2.06539		15.414	3.30861	2.53169	2.42626	2.55353	17.6576	9.98647		-3.1568	0.0184655	1.83832	7.69688	0.0185735
SLC25A11	104.198	89.1703	143.617	108.475	100.345		51.6416	62.945	82.5825	91.4484	97.3625	45.1084	94.0107		2.8284	0.018476	109.161	75.0142	0.0185876
CNIH2	0.303765	0.542795	1.24176	0.612903	1.24632		0.859552	2.6878	4.3269	5.1849	2.91774	1.0181	1.04428		-2.82295	0.0184798	0.789509	2.57704	0.0186017
HGSNAT	36.0531	70.4341	30.708	116.128	43.0723		22.3366	23.7721	19.1396	27.7081	28.7545	23.0833	12.3957		3.29439	0.0184814	59.2791	22.4557	0.0186158
FBXO38	15.3997	13.2781	18.3234	8.61071	10.6915		21.2857	23.1773	21.8972	20.3701	15.1949	22.9191	21.3259		-3.34423	0.0184859	13.2607	20.8815	0.0186299
POMT2	14.2414	15.0283	17.3363	22.414	14.4433		25.6862	18.9399	27.8275	30.1051	16.1545	23.7079	21.9078		-2.8381	0.0184998	16.6927	23.4756	0.0186439
SENP2	19.1231	18.8988	14.4011	17.1241	14.3314		26.5759	22.5755	22.3297	26.7133	14.9336	25.4559	46.303		-2.90186	0.0185028	16.7757	26.4124	0.018658
OPN3	7.64929	6.68231	4.86899	7.63577	3.15885		2.15477	4.52402	3.36041	3.60539	2.02262	3.85042	2.94126		3.00652	0.0185157	5.99904	3.20841	0.0186721
PIP	133.89	978.089	552.304	967.178	1952.97		3.1721	3.87793	59.7541	2.47813	6.58431	0.865487	1e-06		3.12446	0.0185173	916.886	10.9617	0.0186862
ID1	3.72582	24.6427	6.54367	7.92231	13.9725		204.482	32.2912	22.1636	12.6536	97.56	231.87	11.9752		-2.82418	0.0185194	11.3614	87.5708	0.0187003
AZIN1	88.2253	53.7177	56.1389	58.771	49.1509		92.5266	121.431	69.1777	254.619	66.6936	105.963	100.839		-2.84974	0.0185282	61.2008	115.893	0.0187144
TRPV6	11.7539	36.9676	16.2199	14.489	124.471		19.3985	1.70554	5.63076	0.300028	4.40342	12.0783	4.96159		2.80782	0.0185536	40.7803	6.92545	0.0187284
RPH3AL	20.473	27.1916	21.5469	24.2569	19.1736		20.7025	15.0218	18.2562	17.9087	8.38299	18.0024	11.1135		2.89422	0.0185569	22.5284	15.6269	0.0187425
CIC	45.0682	41.0432	53.2548	46.9872	38.7333		49.1585	61.3873	66.2957	61.259	44.0637	58.4898	52.8865		-2.83296	0.0185604	45.0173	56.2201	0.0187566
PGRMC2	36.5569	37.1672	46.5174	32.8702	31.862		76.7816	29.0976	52.617	80.2497	44.0015	89.2298	90.5998		-2.95809	0.0185749	36.9947	66.0824	0.0187707
TMEM43	88.1471	125.069	64.3673	101.044	72.8848		309.894	174.855	70.5164	94.3237	273.032	361.368	227.491		-2.89514	0.0186006	90.3024	215.926	0.0187848
SRSF5	199.154	226.761	175.77	144.229	227.281		125.251	120.973	213.365	155.684	56.5629	99.28	82.0288		2.88211	0.0186044	194.639	121.878	0.0187988
TUBA8	17.7641	16.0429	15.7713	9.64088	30.91		4.70863	16.6948	12.8447	6.99154	9.03043	6.21426	2.55366		2.80647	0.0186178	18.0258	8.434	0.0188129
RSG1	12.6176	20.4663	13.1675	14.4089	22.1622		11.777	8.80724	5.67458	5.36663	19.1864	8.23705	10.4208		2.81425	0.0186748	16.5645	9.92424	0.018827
C9orf64	77.5907	70.6795	67.4305	62.0743	66.0335		102.143	93.8014	75.1373	121.256	75.0921	102.755	66.4741		-2.92186	0.0186794	68.7617	90.9513	0.0188411
ATP6V1C1	40.6421	36.7851	31.6114	38.9975	27.7359		63.0483	60.2327	39.5032	129.764	32.6233	61.9877	63.4589		-2.93767	0.0187449	35.1544	64.374	0.0188552
CCDC99	12.3087	9.14879	14.6701	4.5017	5.57362		17.2894	15.0111	20.1345	25.1291	15.5187	16.6875	26.0182		-3.38232	0.0188043	9.24058	19.3984	0.0188693
SNF8	66.186	59.635	57.9457	54.595	77.6516		87.9714	69.0077	115.488	126.765	71.5114	63.131	103.433		-2.8383	0.0188597	63.2027	91.0439	0.0188833
TMEM102	22.6065	28.3655	34.9348	22.7165	30.3504		9.8561	16.0085	14.7972	15.597	34.6161	9.73271	21.5497		2.88457	0.0188615	27.7947	17.451	0.0188974
CFL1	163.741	278.311	535.686	688.375	310.959		184.35	276.225	130.054	110.783	137.274	81.733	139.432		3.09355	0.0188637	395.414	151.407	0.0189115
C1orf123	20.7869	22.763	19.4798	13.7226	19.1828		12.454	8.23483	13.2875	14.157	12.1948	14.7158	19.5469		2.80005	0.0188753	19.187	13.513	0.0189256
C9orf167	1.40663	3.41945	1.86912	3.68585	1.93734		4.14439	3.1848	5.36323	2.60499	7.61738	4.80762	5.9151		-2.93106	0.0188797	2.46368	4.80536	0.0189397
MED31	44.9022	48.9858	56.8902	33.4911	57.8997		28.7871	24.8779	40.5616	48.093	27.2157	28.9086	34.527		2.84838	0.0188855	48.4338	33.2816	0.0189537
FBXO31	23.9187	17.5347	20.1754	14.3957	17.7766		12.5525	13.7224	14.2322	12.5881	14.8267	8.75578	17.9732		2.82176	0.0188882	18.7602	13.5215	0.0189678
PRPSAP2	16.6253	21.8384	16.3103	16.4353	12.5065		11.6355	14.5649	11.2496	6.55415	10.3212	12.4336	14.5513		2.79758	0.0189146	16.7432	11.6158	0.0189819
NOXA1	65.3319	70.223	52.4638	36.5392	64.304		44.4363	42.7324	38.9052	36.0441	22.102	33.8793	42.7613		2.90967	0.0190189	57.7724	37.2658	0.0190242
ZFYVE28	3.61712	2.44854	2.52245	2.54084	3.32524		1.33647	1.00935	1.22512	1.62847	3.69872	2.50446	1.10463		2.91318	0.0190201	2.89084	1.78675	0.0190382
* We also tried Limma and CyberT, and obtained similar results.

## Sheet: Table S6B-ER-Heatmap_genes
Table S6B (related to Figure 6): Enriched functions of differentially expressed genes between complex and simple carcinomas at FDR ≤ 0.2 (Table S6A & Figure 6B)
ER+ vs. ER- FDR0.2-heatmap
Cluster	Gene
Oxidation reduction	ACAD8
	ACADM
	ACADVL
	ACOT8
	ADK
	ADPRHL2
	ALDH6A1
	ALDH7A1
	ATP2B1
	ATP6V0D1
	BCKDHB
	CHID1
	CTBP1
	CTSF
	CYP1B1
	CYP4V2
	DHRS3
	ECHS1
	ETFA
	FDX1
	GABARAPL1
	GABARAPL2
	GCLM
	GGT6
	HEXA
	HSD17B4
	HSDL2
	IAH1
	IDH3A
	IVD
	LAP3
	LONP2
	MLYCD
	MRI1
	MSRA
	NDUFA9
	NUDT18
	NUDT4
	NUDT9
	PGM2
	PINK1
	PLBD2
	PNPLA8
	PNPO
	PRPS1L1
	QDPR
	RHEB
	SCP2
	SDHD
	SEPHS2
	SMPD1
	SUOX
	THTPA
	TMEM55B
	TXNRD1
	USP5
	VPS11
Protein transport	AP1B1
	AP2A2
	AP3S2
	ARF3
	ARFIP1
	ATG3
	C11ORF2
	CHMP1A
	COG7
	COG8
	FXC1
	GABARAPL2
	HSPA9
	LMF1
	LONP2
	MTX2
	NUP88
	RAB1B
	SELS
	TOMM70A
	TSG101
	VPS11
	VPS4A
Cofactor biosynthetic process	ALAS1
	GCLM
	GGT6
	HMBS
	ISCU
	MLYCD
	NAMPT
	UROD
carboxylic acid catabolic process	ACADVL
	ALDH6A1
	ACADM
	ACOT8
	BCKDHB
	ECHS1
	ACAD8
	HIBCH
	HSD17B4
ATP binding	ACLY
	ARAF
	ATP13A1
	CBWD1
	CDK16
	CNKSR3
	DAPK3
	DDX27
	DDX50
	DHX40
	DTD1
	DTYMK
	EPHB4
	FGFR3
	HSPA13
	MCM4
	MCM6
	NME1
	PGS1
	RFC4
	SRC
	STK24
	TOR1A
	UBE2S
	UCK1
Endoplasmic reticulum	AGPAT1
	AUP1
	BACE2
	BFAR
	CNIH4
	CYP51A1
	DNAJB11
	DPM1
	HSPA13
	MOGS
	NPLOC4
	PACS2
	PGS1
	PSMG1
	SEC22B
	SPTLC3
	SQLE
	TMEM43
	TOR1A
DNA replication	HMGB2
	MCM4
	MCM6
	PCNA
	RFC4
	RPA1
	RRM2
Lipid biosynthetic process	ACLY
	AGPAT1
	CYP51A1
	DPM1
	HMGCS1
	MBOAT7
	PGS1
	SPTLC3
	SQLE
ATP binding	ABCC11
	ABCD1
	ACSM5
	ACSS3
	ACTR3B
	ADRBK2
	ATAD3A
	ATP13A2
	ATP2C2
	CHKB
	CLPB
	CPT1B
	DAK
	DDR2
	DDX28
	DGKZ
	DHX38
	EIF2AK4
	FUK
	GNE
	GSS
	IGHMBP2
	IKBKB
	KTI12
	MAP2K3
	MAP3K6
	MAP4K2
	MSH3
	MTHFSD
	MYO1B
	NLRX1
	NOD2
	PANK4
	PC
	PFKFB2
	PFKM
	PIP5K1B
	PRKAG2
	PRKCZ
	RIOK2
	RPS6KB2
	SIK2
	SPG7
	TEP1
	WARS2
Oxidation reduction	ABCD1
	ALKBH3
	BCO2
	BLVRA
	DHRS1
	DUS2L
	EHHADH
	FOXRED1
	GSR
	HACL1
	HSD11B1
	LDHD
	MAOA
	MPV17
	MTHFR
	NUDT12
	PEX14
	PEX16
	PEX7
	PYROXD2
	SEPX1
	SLC25A12
	STEAP1
	STEAP2
	WWOX
Mitochondrion	ACSM5
	ACSS3
	AGXT2L2
	ALKBH3
	ATPAF2
	CHKB
	CPT1B
	DDX28
	DHRS1
	EHHADH
	FOXRED1
	GSR
	HINT2
	KIAA0141
	LACTB
	LDHD
	LIAS
	MACROD1
	MAOA
	MPV17
	MRPS15
	MTUS1
	NIT2
	NLRX1
	NUDT8
	PC
	RHOT2
	SLC25A12
	SPG7
	WARS2
	WWOX
	YRDC
Regulation of phosphorylation	CHRM1
	CHRNA7
	DGKZ
	DVL1
	EDNRB
	GPS2
	MAP2K3
	MAP3K6
	NOD2
	PFKFB2
	PRKAG2
	PRKCZ
	PRLR
	TLR6
	TSPYL2
	VEGFC
Cell cycle	ANAPC1
	ANLN
	BIRC5
	BRCA1
	BUB1
	CABLES2
	CBFA2T2
	CCDC99
	CCNA2
	CCNB2
	CCNE1
	CCNE2
	CCNF
	CDC25A
	CDC25B
	CDC45
	CDC6
	CDCA2
	CDCA3
	CDK1
	CDK6
	CDKN2D
	CENPA
	CENPJ
	CENPO
	CEP55
	CEP72
	CHAF1A
	CHAF1B
	CHFR
	CHTF18
	CKAP2
	COMMD7
	DBF4
	DEDD2
	DIAPH3
	DLGAP5
	DNMT1
	DSCC1
	E2F1
	E2F8
	EIF2B1
	EIF2C2
	ERCC6L
	ESCO2
	ESPL1
	FAM83D
	FANCD2
	FANCI
	FBXO5
	GTSE1
	HAUS5
	HAUS8
	HIVEP1
	HJURP
	HR
	ID1
	KIF11
	KIF15
	KIF22
	KIF23
	KIF2C
	KIFC1
	KNTC1
	LATS2
	LIF
	LIG1
	LIG3
	LPIN1
	MAPK14
	MCM2
	MCM3
	MTBP
	MXD3
	MYO9B
	NCAPG
	NCAPH
	NDC80
	NEK2
	NODAL
	NUF2
	NUSAP1
	PDGFB
	PIAS4
	PKMYT1
	PLK1
	PLK4
	POLD1
	POLE
	POT1
	PPM1D
	PRC1
	PTTG1
	RACGAP1
	RAD1
	RAD51
	RBL1
	SGCB
	SGOL1
	SKA2
	SKA3
	SMURF2
	SPAG5
	SPC24
	SRPK1
	STRN3
	SUV39H1
	TAF2
	TFDP1
	TOP2A
	TPX2
	TRIP13
	TTK
	TUBGCP3
	UBE2C
	UHRF1
	UIMC1
	UTP14C
DNA repair	BRCA1
	CCNE2
	CDC25A
	CDC45
	CDC6
	CDKN2D
	CHAF1A
	CHAF1B
	CHTF18
	DBF4
	DCLRE1B
	DSCC1
	DTL
	ESCO2
	FANCD2
	FANCI
	GINS4
	KIF22
	LIG1
	LIG3
	MCM2
	MCM3
	MCM5
	NSMCE2
	PDGFB
	POLD1
	POLE
	POT1
	PTTG1
	RAD1
	RAD51
	RAD51AP1
	RFC3
	TK1
	TOP2A
	TRIP13
	UHRF1
	UIMC1
Protein serine/threonine kinase activity	BUB1
	CDK1
	CDK6
	LATS2
	MAP3K9
	MAPK14
	MELK
	NEK2
	PKMYT1
	PLK1
	PLK4
	RIPK4
	SRPK1
	STK3
	TRIO
	TTK
	VRK1
GTPase regulator activity	ARHGAP11A
	ASAP1
	DEPDC1
	DEPDC1B
	IQGAP3
	MYO9B
	RACGAP1
	SYDE2
DNA replication	BRCA1
	CCNE2
	CDC25A
	CDC45
	CDC6
	CDKN2D
	CHAF1A
	CHAF1B
	CHTF18
	DBF4
	DSCC1
	DTL
	GINS4
	LIG1
	LIG3
	MCM2
	MCM3
	MCM5
	PDGFB
	POLD1
	POLE
	POT1
	RAD1
	RAD51
	RFC3
	TK1
	TOP2A

## Sheet: Tabel S6C-ER-FDR0.2-1st
Table S6C (related to Figure 6): Functional annotation of the 1st group of genes of the heatmap (Figure 6B) by DAVID
Annotation Cluster 1	Enrichment Score: 4.358002482856811
Category	Term	Count	%	PValue	Genes	List Total	Pop Hits	Pop Total	Fold Enrichment	Bonferroni	Benjamini	FDR
SP_PIR_KEYWORDS	transit peptide	29	11.4173	3.75e-11	FDX1, PINK1, ECHS1, COX5B, ALAS1, IVD, NUDT9, MCEE, MRPL17, REXO2, SLC25A3, ACAD8, HMGCL, ETFA, HSPA9, SUOX, ALDH6A1, ACADM, NDUFA9, BCKDHB, IDH3A, ACADVL, ISCU, COG8, MLYCD, SDHD, ATPIF1, HIBCH, SCP2	254	476	19235	4.6137	1.17e-08	1.17e-08	5.04e-08
GOTERM_CC_FAT	GO:0005739~mitochondrion	48	18.8976	3.96e-11	TUSC3, FDX1, MTX2, PINK1, ECHS1, BPHL, COX5B, ALAS1, AGPAT5, ACOT8, IVD, NUDT9, FXC1, MRPL17, MCEE, REXO2, SLC25A3, ACAD8, HSD17B4, DHX32, HMGCL, HSPA9, ETFA, BRP44, SUOX, ALDH6A1, ACADM, C17ORF61, FIBP, NDUFA9, HMBS, BCKDHB, PARK7, IDH3A, LAP3, ACADVL, ISCU, SLC25A11, ALDH7A1, HSDL2, COG8, MLYCD, TOMM70A, SDHD, ATPIF1, HIBCH, SCP2, MPST	197	1087	12782	2.86513	1.15e-08	1.15e-08	5.27e-08
UP_SEQ_FEATURE	transit peptide:Mitochondrion	28	11.0236	1.45e-10	FDX1, PINK1, ECHS1, COX5B, ALAS1, IVD, NUDT9, MCEE, MRPL17, REXO2, SLC25A3, ACAD8, HMGCL, ETFA, HSPA9, SUOX, ALDH6A1, ACADM, NDUFA9, BCKDHB, IDH3A, ACADVL, ISCU, MLYCD, COG8, SDHD, ATPIF1, HIBCH	254	467	19113	4.51166	1.03e-07	1.03e-07	2.2e-07
SP_PIR_KEYWORDS	mitochondrion	35	13.7795	4.42e-09	FDX1, MTX2, PINK1, ECHS1, COX5B, ALAS1, IVD, NUDT9, FXC1, MRPL17, MCEE, REXO2, SLC25A3, ACAD8, HMGCL, DHX32, HSPA9, ETFA, SUOX, ALDH6A1, ACADM, NDUFA9, BCKDHB, IDH3A, ACADVL, SLC25A11, ISCU, COG8, TOMM70A, MLYCD, SDHD, ATPIF1, HIBCH, SCP2, MPST	254	832	19235	3.18569	1.37e-06	4.58e-07	5.94e-06
GOTERM_MF_FAT	GO:0050662~coenzyme binding	14	5.51181	2.53e-06	ALDH6A1, SUOX, CTBP1, ACADM, NDUFA9, HMBS, IDH3A, ACADVL, IVD, PNPO, TXNRD1, ACAD8, HMGCL, ETFA	191	181	12983	5.25764	0.00116926	0.00116926	0.00360608
GOTERM_MF_FAT	GO:0048037~cofactor binding	16	6.29921	3.81e-06	ALDH6A1, SUOX, CTBP1, ACADM, NDUFA9, HMBS, IDH3A, PDXDC1, ACADVL, ALAS1, IVD, PNPO, TXNRD1, ACAD8, HMGCL, ETFA	191	249	12983	4.3678	0.00175753	0.000879	0.00542189
UP_SEQ_FEATURE	binding site:Substrate; via amide nitrogen	6	2.3622	1.08e-05	ACADVL, ACADM, ECHS1, ACAD8, HIBCH, IAH1	254	23	19113	19.6299	0.00763943	0.00382704	0.0163382
GOTERM_CC_FAT	GO:0044429~mitochondrial part	24	9.44882	4.14e-05	SUOX, ACADM, C17ORF61, FDX1, NDUFA9, MTX2, BCKDHB, ECHS1, PINK1, COX5B, IDH3A, ACADVL, SLC25A11, ALAS1, IVD, TOMM70A, FXC1, MRPL17, SDHD, SLC25A3, ATPIF1, HMGCL, HSPA9, ETFA	197	595	12782	2.61714	0.0119777	0.00300797	0.0550626
SP_PIR_KEYWORDS	oxidoreductase	21	8.26772	5.8e-05	ALDH6A1, SUOX, CTBP1, ACADM, CYP1B1, NDUFA9, BCKDHB, QDPR, CYP4V2, COX5B, IDH3A, ACADVL, MSRA, DHRS3, ALDH7A1, IVD, HSDL2, PNPO, TXNRD1, ACAD8, HSD17B4	254	562	19235	2.82971	0.0178798	0.00450024	0.0779162
GOTERM_MF_FAT	GO:0009055~electron carrier activity	13	5.11811	9.94e-05	SUOX, ACADM, CYP1B1, FDX1, QDPR, CYP4V2, ACADVL, DHRS3, IVD, SDHD, TXNRD1, ACAD8, ETFA	191	221	12983	3.99846	0.0449029	0.0151974	0.141508
GOTERM_BP_FAT	GO:0055114~oxidation reduction	24	9.44882	0.000131	ALDH6A1, SUOX, CTBP1, ACADM, CYP1B1, FDX1, NDUFA9, BCKDHB, QDPR, CYP4V2, GCLM, IDH3A, ACADVL, MSRA, DHRS3, ALDH7A1, IVD, HSDL2, SDHD, PNPO, TXNRD1, ACAD8, HSD17B4, ETFA	209	639	13528	2.43107	0.156171	0.0813981	0.213187
INTERPRO	IPR006089:Acyl-CoA dehydrogenase, conserved site	4	1.5748	0.000341	ACADVL, ACADM, IVD, ACAD8	244	10	16659	27.3098	0.160523	0.160523	0.491734
INTERPRO	IPR006092:Acyl-CoA dehydrogenase, N-terminal	4	1.5748	0.000464	ACADVL, ACADM, IVD, ACAD8	244	11	16659	24.8271	0.211812	0.112201	0.668311
SP_PIR_KEYWORDS	Flavoprotein	8	3.14961	0.000535	ACADVL, ACADM, IVD, NDUFA9, PNPO, TXNRD1, ACAD8, ETFA	254	107	19235	5.66193	0.153271	0.0164999	0.716226
GOTERM_CC_FAT	GO:0031980~mitochondrial lumen	12	4.72441	0.000757	ACADVL, ALAS1, ACADM, IVD, FDX1, NDUFA9, BCKDHB, ECHS1, IDH3A, HMGCL, HSPA9, ETFA	197	227	12782	3.42995	0.197887	0.0310099	1.00282
GOTERM_CC_FAT	GO:0005759~mitochondrial matrix	12	4.72441	0.000757	ACADVL, ALAS1, ACADM, IVD, FDX1, NDUFA9, BCKDHB, ECHS1, IDH3A, HMGCL, HSPA9, ETFA	197	227	12782	3.42995	0.197887	0.0310099	1.00282
INTERPRO	IPR006090:Acyl-CoA oxidase/dehydrogenase, type 1	4	1.5748	0.000787	ACADVL, ACADM, IVD, ACAD8	244	13	16659	21.0076	0.332232	0.125939	1.13119
INTERPRO	IPR013786:Acyl-CoA dehydrogenase/oxidase, N-terminal	4	1.5748	0.000991	ACADVL, ACADM, IVD, ACAD8	244	14	16659	19.507	0.398592	0.119372	1.4223
INTERPRO	IPR006091:Acyl-CoA oxidase/dehydrogenase, central region	4	1.5748	0.00122509	ACADVL, ACADM, IVD, ACAD8	244	15	16659	18.2066	0.4668	0.118184	1.75604
INTERPRO	IPR013764:Acyl-CoA oxidase/dehydrogenase, type1/2, C-terminal	4	1.5748	0.00122509	ACADVL, ACADM, IVD, ACAD8	244	15	16659	18.2066	0.4668	0.118184	1.75604
GOTERM_MF_FAT	GO:0003995~acyl-CoA dehydrogenase activity	4	1.5748	0.00123297	ACADVL, ACADM, IVD, ACAD8	191	15	12983	18.1264	0.434466	0.132809	1.74153
UP_SEQ_FEATURE	nucleotide phosphate-binding region:FAD	6	2.3622	0.00127044	ACADVL, ACADM, IVD, TXNRD1, ACAD8, ETFA	254	61	19113	7.40145	0.593964	0.201746	1.90208
UP_SEQ_FEATURE	region of interest:Substrate binding	8	3.14961	0.00174128	ACADVL, ACADM, IVD, RNASE4, PNPO, ECHS1, ACAD8, UROD	254	130	19113	4.63065	0.709352	0.186118	2.59838
SP_PIR_KEYWORDS	FAD	7	2.75591	0.00399083	ACADVL, ACADM, IVD, NDUFA9, TXNRD1, ACAD8, ETFA	254	114	19235	4.64999	0.711665	0.0984466	5.23117
GOTERM_MF_FAT	GO:0050660~FAD binding	6	2.3622	0.00403437	ACADVL, ACADM, IVD, TXNRD1, ACAD8, ETFA	191	72	12983	5.66449	0.845513	0.311699	5.59412
UP_SEQ_FEATURE	binding site:Substrate; via carbonyl oxygen	4	1.5748	0.00475823	ACADVL, ACADM, IVD, ACAD8	254	26	19113	11.5766	0.966008	0.344728	6.95169
COG_ONTOLOGY	Lipid metabolism	5	1.9685	0.00584529	ACADVL, ACADM, ECHS1, ACAD8, HIBCH	24	64	1950	6.34766	0.0679318	0.0679318	3.70146
Annotation Cluster 2	Enrichment Score: 3.9323936648296893
Category	Term	Count	%	PValue	Genes	List Total	Pop Hits	Pop Total	Fold Enrichment	Bonferroni	Benjamini	FDR
GOTERM_CC_FAT	GO:0005794~Golgi apparatus	31	12.2047	2.44e-05	AP1B1, CLSTN1, AP3S2, RAB1B, CHPF2, SEC14L1, PICALM, ZFPL1, PDGFC, NDRG2, PPAP2B, C11ORF2, GABARAPL2, PGAP2, GABARAPL1, MAP2K1, ACO1, TAF7, ARFIP1, TOX4, AGTRAP, GAK, PNPLA8, SCYL1, COG7, COG8, ARF3, NUCB2, BACE1, TRAPPC1, GOLGB1	197	872	12782	2.30663	0.00707866	0.00236514	0.0324647
SP_PIR_KEYWORDS	golgi apparatus	21	8.26772	0.000107	PGAP2, GABARAPL2, GABARAPL1, AP1B1, CLSTN1, AP3S2, CHPF2, GAK, AGTRAP, PNPLA8, PICALM, SCYL1, COG7, COG8, ARF3, BACE1, ZFPL1, TRAPPC1, PPAP2B, C11ORF2, GOLGB1	254	588	19235	2.70458	0.032851	0.00476045	0.144208
GOTERM_CC_FAT	GO:0044431~Golgi apparatus part	14	5.51181	0.000608	PGAP2, GABARAPL2, AP1B1, CLSTN1, CHPF2, ARFIP1, COG7, SCYL1, COG8, BACE1, NUCB2, PDGFC, TRAPPC1, GOLGB1	197	294	12782	3.08968	0.162315	0.0290875	0.806278
Annotation Cluster 3	Enrichment Score: 3.1861258766670915
Category	Term	Count	%	PValue	Genes	List Total	Pop Hits	Pop Total	Fold Enrichment	Bonferroni	Benjamini	FDR
KEGG_PATHWAY	hsa00280:Valine, leucine and isoleucine degradation	10	3.93701	5.35e-08	ALDH6A1, ALDH7A1, ACADM, IVD, MCEE, BCKDHB, ECHS1, ACAD8, HIBCH, HMGCL	92	44	5085	12.5618	6.42e-06	6.42e-06	6.14e-05
GOTERM_BP_FAT	GO:0016054~organic acid catabolic process	9	3.54331	0.000311	ACADVL, ALDH6A1, ACADM, ACOT8, BCKDHB, ECHS1, ACAD8, HIBCH, HSD17B4	209	111	13528	5.24816	0.332355	0.125993	0.506469
GOTERM_BP_FAT	GO:0046395~carboxylic acid catabolic process	9	3.54331	0.000311	ACADVL, ALDH6A1, ACADM, ACOT8, BCKDHB, ECHS1, ACAD8, HIBCH, HSD17B4	209	111	13528	5.24816	0.332355	0.125993	0.506469
GOTERM_BP_FAT	GO:0009083~branched chain family amino acid catabolic process	4	1.5748	0.00054	ALDH6A1, BCKDHB, ACAD8, HIBCH	209	11	13528	23.5372	0.504044	0.160809	0.877497
GOTERM_BP_FAT	GO:0009081~branched chain family amino acid metabolic process	4	1.5748	0.00173067	ALDH6A1, BCKDHB, ACAD8, HIBCH	209	16	13528	16.1818	0.89461	0.184989	2.78835
GOTERM_BP_FAT	GO:0009063~cellular amino acid catabolic process	4	1.5748	0.086967	ALDH6A1, BCKDHB, ACAD8, HIBCH	209	68	13528	3.80749	1	0.878821	77.3589
GOTERM_BP_FAT	GO:0009310~amine catabolic process	4	1.5748	0.118492	ALDH6A1, BCKDHB, ACAD8, HIBCH	209	78	13528	3.31935	1	0.903715	87.2427
Annotation Cluster 4	Enrichment Score: 2.8964399526863054
Category	Term	Count	%	PValue	Genes	List Total	Pop Hits	Pop Total	Fold Enrichment	Bonferroni	Benjamini	FDR
KEGG_PATHWAY	hsa00280:Valine, leucine and isoleucine degradation	10	3.93701	5.35e-08	ALDH6A1, ALDH7A1, ACADM, IVD, MCEE, BCKDHB, ECHS1, ACAD8, HIBCH, HMGCL	92	44	5085	12.5618	6.42e-06	6.42e-06	6.14e-05
UP_SEQ_FEATURE	binding site:Substrate; via amide nitrogen	6	2.3622	1.08e-05	ACADVL, ACADM, ECHS1, ACAD8, HIBCH, IAH1	254	23	19113	19.6299	0.00763943	0.00382704	0.0163382
KEGG_PATHWAY	hsa00640:Propanoate metabolism	7	2.75591	1.73e-05	ALDH6A1, ALDH7A1, ACADM, MLYCD, MCEE, ECHS1, HIBCH	92	32	5085	12.0907	0.00207874	0.00103991	0.0199042
GOTERM_BP_FAT	GO:0016054~organic acid catabolic process	9	3.54331	0.000311	ACADVL, ALDH6A1, ACADM, ACOT8, BCKDHB, ECHS1, ACAD8, HIBCH, HSD17B4	209	111	13528	5.24816	0.332355	0.125993	0.506469
GOTERM_BP_FAT	GO:0046395~carboxylic acid catabolic process	9	3.54331	0.000311	ACADVL, ALDH6A1, ACADM, ACOT8, BCKDHB, ECHS1, ACAD8, HIBCH, HSD17B4	209	111	13528	5.24816	0.332355	0.125993	0.506469
KEGG_PATHWAY	hsa00410:beta-Alanine metabolism	5	1.9685	0.000549	ALDH7A1, ACADM, MLYCD, ECHS1, HIBCH	92	22	5085	12.5618	0.0637338	0.0217126	0.628
GOTERM_BP_FAT	GO:0006635~fatty acid beta-oxidation	5	1.9685	0.000832	ACADVL, ACADM, ACOT8, ECHS1, HSD17B4	209	28	13528	11.5584	0.660936	0.143165	1.35014
GOTERM_BP_FAT	GO:0044242~cellular lipid catabolic process	7	2.75591	0.00109851	ACADVL, ACADM, ACOT8, HEXA, SMPD1, ECHS1, HSD17B4	209	76	13528	5.96172	0.760151	0.163449	1.77842
GOTERM_BP_FAT	GO:0016042~lipid catabolic process	10	3.93701	0.00142507	ACADVL, PNPLA8, ACADM, ACOT8, HEXA, SMPD1, ECHS1, HSD17B4, PLBD2, IAH1	209	173	13528	3.74146	0.843154	0.18603	2.30136
GOTERM_BP_FAT	GO:0009062~fatty acid catabolic process	5	1.9685	0.00217548	ACADVL, ACADM, ACOT8, ECHS1, HSD17B4	209	36	13528	8.9899	0.94093	0.195567	3.49312
GOTERM_BP_FAT	GO:0034440~lipid oxidation	5	1.9685	0.00293072	ACADVL, ACADM, ACOT8, ECHS1, HSD17B4	209	39	13528	8.29837	0.977909	0.238396	4.67876
GOTERM_BP_FAT	GO:0019395~fatty acid oxidation	5	1.9685	0.00293072	ACADVL, ACADM, ACOT8, ECHS1, HSD17B4	209	39	13528	8.29837	0.977909	0.238396	4.67876
COG_ONTOLOGY	Lipid metabolism	5	1.9685	0.00584529	ACADVL, ACADM, ECHS1, ACAD8, HIBCH	24	64	1950	6.34766	0.0679318	0.0679318	3.70146
GOTERM_BP_FAT	GO:0030258~lipid modification	5	1.9685	0.0215895	ACADVL, ACADM, ACOT8, ECHS1, HSD17B4	209	69	13528	4.69038	1	0.69313	29.9761
KEGG_PATHWAY	hsa00071:Fatty acid metabolism	4	1.5748	0.034013	ACADVL, ALDH7A1, ACADM, ECHS1	92	40	5085	5.52717	0.984276	0.564176	32.7828
SP_PIR_KEYWORDS	fatty acid metabolism	4	1.5748	0.0482376	ACADVL, ACADM, ECHS1, HSD17B4	254	62	19235	4.8857	1	0.40102	48.5363
GOTERM_BP_FAT	GO:0006631~fatty acid metabolic process	7	2.75591	0.0853047	ACADVL, PNPLA8, ACADM, ACOT8, MLYCD, ECHS1, HSD17B4	209	198	13528	2.28834	1	0.878264	76.6765
SP_PIR_KEYWORDS	lipid metabolism	4	1.5748	0.319507	ACADVL, ACADM, ECHS1, HSD17B4	254	151	19235	2.00605	1	0.882084	99.4328
Annotation Cluster 5	Enrichment Score: 2.560882826636745
Category	Term	Count	%	PValue	Genes	List Total	Pop Hits	Pop Total	Fold Enrichment	Bonferroni	Benjamini	FDR
GOTERM_CC_FAT	GO:0044431~Golgi apparatus part	14	5.51181	0.000608	PGAP2, GABARAPL2, AP1B1, CLSTN1, CHPF2, ARFIP1, COG7, SCYL1, COG8, BACE1, NUCB2, PDGFC, TRAPPC1, GOLGB1	197	294	12782	3.08968	0.162315	0.0290875	0.806278
GOTERM_CC_FAT	GO:0012505~endomembrane system	23	9.05512	0.00428149	PGAP2, GABARAPL2, TUSC3, CYP1B1, AP1B1, NUP88, CLSTN1, BSCL2, DPAGT1, STIM1, CHPF2, ARFIP1, SELS, CHMP1A, AP2A2, PICALM, SCYL1, NUCB2, MPDU1, SPCS3, PDGFC, PPAP2B, GOLGB1	197	782	12782	1.90833	0.713091	0.129539	5.54722
GOTERM_CC_FAT	GO:0000139~Golgi membrane	9	3.54331	0.0079713	PGAP2, GABARAPL2, SCYL1, AP1B1, CLSTN1, PDGFC, CHPF2, ARFIP1, GOLGB1	197	186	12782	3.13951	0.902601	0.164019	10.0981
Annotation Cluster 6	Enrichment Score: 2.3995100817850026
Category	Term	Count	%	PValue	Genes	List Total	Pop Hits	Pop Total	Fold Enrichment	Bonferroni	Benjamini	FDR
UP_SEQ_FEATURE	domain:SCP2	3	1.1811	0.00169997	HSDL2, HSD17B4, SCP2	254	5	19113	45.1488	0.700698	0.214363	2.53747
INTERPRO	IPR003033:Sterol-binding	3	1.1811	0.00205843	HSDL2, HSD17B4, SCP2	244	5	16659	40.9648	0.652526	0.161531	2.93409
SP_PIR_KEYWORDS	peroxisome	6	2.3622	0.00671448	LONP2, ACOT8, HSDL2, MLYCD, HSD17B4, SCP2	254	90	19235	5.04856	0.87696	0.130366	8.65463
INTERPRO	IPR002198:Short-chain dehydrogenase/reductase SDR	5	1.9685	0.0107392	DHRS3, HSDL2, QDPR, HSD17B4, SCP2	244	59	16659	5.78598	0.996069	0.546737	14.448
Annotation Cluster 7	Enrichment Score: 2.3833788984754403
Category	Term	Count	%	PValue	Genes	List Total	Pop Hits	Pop Total	Fold Enrichment	Bonferroni	Benjamini	FDR
GOTERM_CC_FAT	GO:0031090~organelle membrane	38	14.9606	3.62e-06	TUSC3, CYP1B1, AP1B1, MTX2, CLSTN1, BSCL2, PINK1, CHPF2, COX5B, FXC1, MRPL17, MPDU1, SLC25A3, VPS4A, PDGFC, VPS11, ATP6V0D1, PPAP2B, HMGCL, GABARAPL2, PGAP2, C17ORF61, NDUFA9, STIM1, DPAGT1, ARFIP1, SELS, ACADVL, PNPLA8, SLC25A11, AP2A2, SCYL1, TOMM70A, NUCB2, SDHD, SPCS3, ATPIF1, GOLGB1	197	1096	12782	2.2496	0.00105294	0.000527	0.00481515
GOTERM_CC_FAT	GO:0044429~mitochondrial part	24	9.44882	4.14e-05	SUOX, ACADM, C17ORF61, FDX1, NDUFA9, MTX2, BCKDHB, ECHS1, PINK1, COX5B, IDH3A, ACADVL, SLC25A11, ALAS1, IVD, TOMM70A, FXC1, MRPL17, SDHD, SLC25A3, ATPIF1, HMGCL, HSPA9, ETFA	197	595	12782	2.61714	0.0119777	0.00300797	0.0550626
GOTERM_CC_FAT	GO:0005740~mitochondrial envelope	15	5.90551	0.00521942	SUOX, C17ORF61, NDUFA9, MTX2, PINK1, COX5B, ACADVL, SLC25A11, TOMM70A, MRPL17, FXC1, SDHD, SLC25A3, ATPIF1, HMGCL	197	419	12782	2.32279	0.781906	0.141255	6.72378
GOTERM_CC_FAT	GO:0031966~mitochondrial membrane	14	5.51181	0.00775462	C17ORF61, NDUFA9, MTX2, PINK1, COX5B, ACADVL, SLC25A11, TOMM70A, MRPL17, FXC1, SDHD, SLC25A3, ATPIF1, HMGCL	197	394	12782	2.3055	0.89621	0.172033	9.83652
GOTERM_CC_FAT	GO:0005743~mitochondrial inner membrane	11	4.33071	0.0196798	ACADVL, SLC25A11, C17ORF61, NDUFA9, MRPL17, FXC1, SDHD, SLC25A3, ATPIF1, COX5B, HMGCL	197	306	12782	2.3324	0.996923	0.240751	23.231
GOTERM_CC_FAT	GO:0031967~organelle envelope	17	6.69291	0.0290561	SUOX, C17ORF61, NUP88, NDUFA9, MTX2, PINK1, COX5B, ACADVL, SLC25A11, TOMM70A, MRPL17, FXC1, SDHD, NUCB2, SLC25A3, ATPIF1, HMGCL	197	620	12782	1.77906	0.999812	0.300595	32.443
GOTERM_CC_FAT	GO:0031975~envelope	17	6.69291	0.0298091	SUOX, C17ORF61, NUP88, NDUFA9, MTX2, PINK1, COX5B, ACADVL, SLC25A11, TOMM70A, MRPL17, FXC1, SDHD, NUCB2, SLC25A3, ATPIF1, HMGCL	197	622	12782	1.77334	0.99985	0.296899	33.1366
GOTERM_CC_FAT	GO:0019866~organelle inner membrane	11	4.33071	0.0306906	ACADVL, SLC25A11, C17ORF61, NDUFA9, MRPL17, FXC1, SDHD, SLC25A3, ATPIF1, COX5B, HMGCL	197	329	12782	2.16935	0.999885	0.294522	33.9401
SP_PIR_KEYWORDS	mitochondrion inner membrane	6	2.3622	0.111679	ACADVL, SLC25A11, FXC1, SDHD, SLC25A3, COX5B	254	193	19235	2.35425	1	0.630421	79.6313
Annotation Cluster 8	Enrichment Score: 2.0828025197758206
Category	Term	Count	%	PValue	Genes	List Total	Pop Hits	Pop Total	Fold Enrichment	Bonferroni	Benjamini	FDR
SP_PIR_KEYWORDS	protein transport	17	6.69291	0.000734	GABARAPL2, AP1B1, TSG101, NUP88, MTX2, AP3S2, RAB1B, ATG3, CHMP1A, AP2A2, COG7, COG8, ARF3, FXC1, VPS4A, VPS11, C11ORF2	254	485	19235	2.6544	0.204087	0.0205375	0.981345
GOTERM_BP_FAT	GO:0045184~establishment of protein localization	24	9.44882	0.00170619	GABARAPL2, AP1B1, NUP88, TSG101, MTX2, LMF1, AP3S2, RAB1B, ARFIP1, ATG3, SELS, CHMP1A, AP2A2, LONP2, COG7, COG8, TOMM70A, ARF3, FXC1, HINFP, VPS4A, VPS11, C11ORF2, HSPA9	209	769	13528	2.0201	0.891198	0.198943	2.74941
GOTERM_BP_FAT	GO:0015031~protein transport	23	9.05512	0.00330593	GABARAPL2, AP1B1, NUP88, TSG101, MTX2, LMF1, AP3S2, RAB1B, ARFIP1, ATG3, SELS, CHMP1A, AP2A2, LONP2, COG7, COG8, TOMM70A, ARF3, FXC1, VPS4A, VPS11, C11ORF2, HSPA9	209	762	13528	1.95371	0.986452	0.249314	5.26271
SP_PIR_KEYWORDS	transport	36	14.1732	0.00401967	AP1B1, TSG101, FDX1, MTX2, AP3S2, RAB1B, SLC7A5, ATP2B1, FXC1, ZFPL1, SLC25A3, VPS4A, VPS11, ATP6V0D1, SLC31A1, C11ORF2, ETFA, GABARAPL2, NDUFA9, NUP88, STIM1, ATG3, SLC25A11, BSPRY, CHMP1A, AP2A2, SCYL1, COG7, COG8, ARF3, SDHD, MFSD10, TXNRD1, ASNA1, TRAPPC1, SCP2	254	1670	19235	1.63247	0.714249	0.0918598	5.26802
GOTERM_BP_FAT	GO:0008104~protein localization	25	9.84252	0.00459665	AP1B1, TSG101, MTX2, LMF1, AP3S2, RAB1B, TERF2IP, LONP2, FXC1, HINFP, VPS4A, VPS11, HSPA9, C11ORF2, GABARAPL2, NUP88, ARFIP1, ATG3, SELS, CHMP1A, AP2A2, COG7, TOMM70A, COG8, ARF3	209	882	13528	1.83467	0.997483	0.296753	7.24592
GOTERM_BP_FAT	GO:0046907~intracellular transport	19	7.48031	0.0127211	GABARAPL2, NUDT4, AP1B1, MAP2K1, MTX2, AP3S2, ARFIP1, SELS, AP2A2, LONP2, SCYL1, COG7, TOMM70A, FXC1, BLOC1S1, TBRG1, VPS4A, TRAPPC1, HSPA9	209	657	13528	1.87187	1	0.530432	18.862
GOTERM_BP_FAT	GO:0034613~cellular protein localization	12	4.72441	0.0529922	AP2A2, LONP2, COG7, AP1B1, TOMM70A, MTX2, FXC1, AP3S2, TERF2IP, ARFIP1, SELS, HSPA9	209	411	13528	1.88985	1	0.814369	58.8902
GOTERM_BP_FAT	GO:0070727~cellular macromolecule localization	12	4.72441	0.0548111	AP2A2, LONP2, COG7, AP1B1, TOMM70A, MTX2, FXC1, AP3S2, TERF2IP, ARFIP1, SELS, HSPA9	209	414	13528	1.87615	1	0.817848	60.1605
GOTERM_BP_FAT	GO:0006886~intracellular protein transport	11	4.33071	0.0636358	AP2A2, LONP2, COG7, AP1B1, TOMM70A, MTX2, FXC1, AP3S2, ARFIP1, SELS, HSPA9	209	374	13528	1.90374	1	0.831258	65.8175
Annotation Cluster 9	Enrichment Score: 1.958877480648585
Category	Term	Count	%	PValue	Genes	List Total	Pop Hits	Pop Total	Fold Enrichment	Bonferroni	Benjamini	FDR
GOTERM_CC_FAT	GO:0005783~endoplasmic reticulum	27	10.6299	0.00320733	TUSC3, CYP1B1, LMF1, CLSTN1, BSCL2, ERLEC1, MPDU1, PPAP2B, PGAP2, SGK1, GABARAPL1, ACO1, STIM1, DPAGT1, EPHX1, UBE2J2, CYP4V2, SELS, AGTRAP, PNPLA8, TXNDC11, NUCB2, BACE1, SPCS3, AHCYL1, TRAPPC1, FKBP2	197	960	12782	1.82484	0.607348	0.110285	4.1829
GOTERM_CC_FAT	GO:0012505~endomembrane system	23	9.05512	0.00428149	PGAP2, GABARAPL2, TUSC3, CYP1B1, AP1B1, NUP88, CLSTN1, BSCL2, DPAGT1, STIM1, CHPF2, ARFIP1, SELS, CHMP1A, AP2A2, PICALM, SCYL1, NUCB2, MPDU1, SPCS3, PDGFC, PPAP2B, GOLGB1	197	782	12782	1.90833	0.713091	0.129539	5.54722
GOTERM_CC_FAT	GO:0042175~nuclear envelope-endoplasmic reticulum network	11	4.33071	0.0122848	PGAP2, TUSC3, CYP1B1, MPDU1, NUCB2, BSCL2, SPCS3, DPAGT1, STIM1, PPAP2B, SELS	197	284	12782	2.51308	0.972595	0.201335	15.1607
GOTERM_CC_FAT	GO:0005789~endoplasmic reticulum membrane	10	3.93701	0.0230327	PGAP2, TUSC3, CYP1B1, MPDU1, BSCL2, SPCS3, DPAGT1, STIM1, PPAP2B, SELS	197	269	12782	2.41202	0.998865	0.255336	26.6508
GOTERM_CC_FAT	GO:0044432~endoplasmic reticulum part	11	4.33071	0.0413201	PGAP2, TUSC3, CYP1B1, MPDU1, BSCL2, SPCS3, DPAGT1, STIM1, PPAP2B, SELS, ERLEC1	197	347	12782	2.05682	0.999995	0.365426	42.9518
Annotation Cluster 10	Enrichment Score: 1.7825235588777326
Category	Term	Count	%	PValue	Genes	List Total	Pop Hits	Pop Total	Fold Enrichment	Bonferroni	Benjamini	FDR
SP_PIR_KEYWORDS	selenium	4	1.5748	0.00770185	SEPHS2, SEPHS1, TXNRD1, SELS	254	31	19235	9.7714	0.909693	0.131896	9.86715
GOTERM_MF_FAT	GO:0008430~selenium binding	4	1.5748	0.0112027	SEPHS2, SEPHS1, TXNRD1, SELS	191	32	12983	8.49673	0.99451	0.524578	14.8223
SP_PIR_KEYWORDS	selenocysteine	3	1.1811	0.0520609	SEPHS2, TXNRD1, SELS	254	28	19235	8.11375	1	0.415135	51.2457
Annotation Cluster 11	Enrichment Score: 1.7232264199501826
Category	Term	Count	%	PValue	Genes	List Total	Pop Hits	Pop Total	Fold Enrichment	Bonferroni	Benjamini	FDR
GOTERM_BP_FAT	GO:0000096~sulfur amino acid metabolic process	4	1.5748	0.00505701	MRI1, MSRA, SEPHS2, GCLM	209	23	13528	11.2569	0.99862	0.306409	7.94379
GOTERM_BP_FAT	GO:0006790~sulfur metabolic process	6	2.3622	0.0323033	MRI1, GGT6, THTPA, MSRA, SEPHS2, GCLM	209	115	13528	3.37708	1	0.747402	41.4971
GOTERM_BP_FAT	GO:0044272~sulfur compound biosynthetic process	4	1.5748	0.0414172	MRI1, GGT6, SEPHS2, GCLM	209	50	13528	5.17818	1	0.791936	49.8717
Annotation Cluster 12	Enrichment Score: 1.7053920864138028
Category	Term	Count	%	PValue	Genes	List Total	Pop Hits	Pop Total	Fold Enrichment	Bonferroni	Benjamini	FDR
GOTERM_CC_FAT	GO:0005773~vacuole	11	4.33071	0.0055095	GABARAPL2, GABARAPL1, CHID1, USP5, HEXA, SMPD1, ATP6V0D1, VPS11, TMEM55B, PLBD2, CTSF	197	252	12782	2.83221	0.799652	0.135976	7.08492
SP_PIR_KEYWORDS	lysosome	7	2.75591	0.0140926	CHID1, HEXA, SMPD1, VPS11, TMEM55B, PLBD2, CTSF	254	149	19235	3.55771	0.987893	0.18179	17.362
GOTERM_CC_FAT	GO:0000323~lytic vacuole	8	3.14961	0.0440721	CHID1, USP5, HEXA, SMPD1, VPS11, TMEM55B, PLBD2, CTSF	197	211	12782	2.46003	0.999998	0.374019	45.0919
GOTERM_CC_FAT	GO:0005764~lysosome	8	3.14961	0.0440721	CHID1, USP5, HEXA, SMPD1, VPS11, TMEM55B, PLBD2, CTSF	197	211	12782	2.46003	0.999998	0.374019	45.0919
Annotation Cluster 13	Enrichment Score: 1.6932203426166725
Category	Term	Count	%	PValue	Genes	List Total	Pop Hits	Pop Total	Fold Enrichment	Bonferroni	Benjamini	FDR
GOTERM_BP_FAT	GO:0051188~cofactor biosynthetic process	8	3.14961	0.000733	ISCU, NAMPT, GGT6, ALAS1, MLYCD, HMBS, UROD, GCLM	209	97	13528	5.33833	0.61403	0.146719	1.18936
GOTERM_BP_FAT	GO:0018130~heterocycle biosynthetic process	6	2.3622	0.00209043	ALAS1, PCBD2, HMBS, ADK, QDPR, UROD	209	59	13528	6.58243	0.934014	0.202701	3.35873
SP_PIR_KEYWORDS	porphyrin biosynthesis	3	1.1811	0.00723311	ALAS1, HMBS, UROD	254	10	19235	22.7185	0.895406	0.131601	9.29339
SP_PIR_KEYWORDS	heme biosynthesis	3	1.1811	0.0122161	ALAS1, HMBS, UROD	254	13	19235	17.4758	0.978129	0.173975	15.2234
BIOCARTA	h_ahspPathway:Hemoglobin's Chaperone	3	1.1811	0.0199874	ALAS1, HMBS, UROD	28	12	1437	12.8304	0.805121	0.805121	19.3595
GOTERM_BP_FAT	GO:0046148~pigment biosynthetic process	4	1.5748	0.0218147	ALAS1, HMBS, PRPS1L1, UROD	209	39	13528	6.63869	1	0.682106	30.2388
GOTERM_BP_FAT	GO:0006783~heme biosynthetic process	3	1.1811	0.0274939	ALAS1, HMBS, UROD	209	17	13528	11.4225	1	0.725659	36.5651
GOTERM_BP_FAT	GO:0042440~pigment metabolic process	4	1.5748	0.0316887	ALAS1, HMBS, PRPS1L1, UROD	209	45	13528	5.75354	1	0.752001	40.8876
GOTERM_BP_FAT	GO:0033014~tetrapyrrole biosynthetic process	3	1.1811	0.0372754	ALAS1, HMBS, UROD	209	20	13528	9.70909	1	0.775828	46.216
GOTERM_BP_FAT	GO:0006779~porphyrin biosynthetic process	3	1.1811	0.0372754	ALAS1, HMBS, UROD	209	20	13528	9.70909	1	0.775828	46.216
GOTERM_BP_FAT	GO:0042168~heme metabolic process	3	1.1811	0.0444245	ALAS1, HMBS, UROD	209	22	13528	8.82645	1	0.797166	52.3784
GOTERM_BP_FAT	GO:0033013~tetrapyrrole metabolic process	3	1.1811	0.0728475	ALAS1, HMBS, UROD	209	29	13528	6.69592	1	0.859852	70.9126
GOTERM_BP_FAT	GO:0006778~porphyrin metabolic process	3	1.1811	0.0728475	ALAS1, HMBS, UROD	209	29	13528	6.69592	1	0.859852	70.9126
KEGG_PATHWAY	hsa00860:Porphyrin and chlorophyll metabolism	3	1.1811	0.117115	ALAS1, HMBS, UROD	92	33	5085	5.0247	1	0.810015	76.0661
Annotation Cluster 14	Enrichment Score: 1.5086114477619756
Category	Term	Count	%	PValue	Genes	List Total	Pop Hits	Pop Total	Fold Enrichment	Bonferroni	Benjamini	FDR
GOTERM_CC_FAT	GO:0031974~membrane-enclosed lumen	42	16.5354	0.0090976	MAEA, BTD, FDX1, TSG101, ECHS1, TERF2IP, ERLEC1, PLBD2, EBNA1BP2, ALAS1, NUMA1, LONP2, WDR55, IVD, FXC1, HINFP, HSD17B4, HMGCL, HSPA9, ETFA, CHD3, SUOX, CTBP1, ACADM, NDUFA9, BCKDHB, TAF7, SRA1, TOX4, SF3A1, IDH3A, NOC2L, ACADVL, MED31, SENP3, TAF10, CHMP1A, PPIG, MED17, CDKN2AIP, PSPC1, ASNA1	197	1856	12782	1.46826	0.930018	0.173012	11.4462
GOTERM_CC_FAT	GO:0070013~intracellular organelle lumen	40	15.748	0.0124293	MAEA, BTD, FDX1, TSG101, ECHS1, TERF2IP, ERLEC1, PLBD2, EBNA1BP2, ALAS1, NUMA1, LONP2, WDR55, IVD, HINFP, HSD17B4, HMGCL, HSPA9, ETFA, CHD3, CTBP1, ACADM, NDUFA9, BCKDHB, SRA1, TAF7, TOX4, SF3A1, IDH3A, NOC2L, ACADVL, MED31, SENP3, TAF10, CHMP1A, PPIG, MED17, CDKN2AIP, PSPC1, ASNA1	197	1779	12782	1.45887	0.973737	0.192728	15.3257
GOTERM_CC_FAT	GO:0043233~organelle lumen	40	15.748	0.0175799	MAEA, BTD, FDX1, TSG101, ECHS1, TERF2IP, ERLEC1, PLBD2, EBNA1BP2, ALAS1, NUMA1, LONP2, WDR55, IVD, HINFP, HSD17B4, HMGCL, HSPA9, ETFA, CHD3, CTBP1, ACADM, NDUFA9, BCKDHB, SRA1, TAF7, TOX4, SF3A1, IDH3A, NOC2L, ACADVL, MED31, SENP3, TAF10, CHMP1A, PPIG, MED17, CDKN2AIP, PSPC1, ASNA1	197	1820	12782	1.42601	0.994265	0.227453	21.0147
GOTERM_CC_FAT	GO:0031981~nuclear lumen	24	9.44882	0.46469	CTBP1, MAEA, BTD, TSG101, SRA1, TAF7, TERF2IP, TOX4, SF3A1, NOC2L, MED31, TAF10, EBNA1BP2, SENP3, NUMA1, CHMP1A, PPIG, WDR55, MED17, CDKN2AIP, HINFP, PSPC1, ASNA1, CHD3	197	1450	12782	1.07393	1	0.965527	99.9754
Annotation Cluster 15	Enrichment Score: 1.4741897512940547
Category	Term	Count	%	PValue	Genes	List Total	Pop Hits	Pop Total	Fold Enrichment	Bonferroni	Benjamini	FDR
SP_PIR_KEYWORDS	peroxisome	6	2.3622	0.00671448	LONP2, ACOT8, HSDL2, MLYCD, HSD17B4, SCP2	254	90	19235	5.04856	0.87696	0.130366	8.65463
UP_SEQ_FEATURE	short sequence motif:Microbody targeting signal	4	1.5748	0.0168749	LONP2, ACOT8, MLYCD, SCP2	254	41	19113	7.34127	0.999994	0.66611	22.6705
GOTERM_CC_FAT	GO:0005777~peroxisome	6	2.3622	0.0210635	PNPLA8, LONP2, ACOT8, MLYCD, HSD17B4, SCP2	197	103	12782	3.77961	0.99796	0.245416	24.6599
GOTERM_CC_FAT	GO:0042579~microbody	6	2.3622	0.0210635	PNPLA8, LONP2, ACOT8, MLYCD, HSD17B4, SCP2	197	103	12782	3.77961	0.99796	0.245416	24.6599
GOTERM_BP_FAT	GO:0007031~peroxisome organization	3	1.1811	0.0481738	LONP2, ACOT8, SCP2	209	23	13528	8.44269	1	0.80689	55.3389
GOTERM_CC_FAT	GO:0044439~peroxisomal part	3	1.1811	0.140693	PNPLA8, LONP2, HSD17B4	197	43	12782	4.52674	1	0.706439	86.6921
GOTERM_CC_FAT	GO:0044438~microbody part	3	1.1811	0.140693	PNPLA8, LONP2, HSD17B4	197	43	12782	4.52674	1	0.706439	86.6921
Annotation Cluster 16	Enrichment Score: 1.4695830003857662
Category	Term	Count	%	PValue	Genes	List Total	Pop Hits	Pop Total	Fold Enrichment	Bonferroni	Benjamini	FDR
GOTERM_BP_FAT	GO:0006091~generation of precursor metabolites and energy	12	4.72441	0.00916115	ACADVL, THTPA, ACO1, FDX1, NDUFA9, SDHD, SLC25A3, TXNRD1, ATPIF1, ATP6V0D1, IDH3A, ETFA	209	313	13528	2.48156	0.999994	0.449957	13.9512
SP_PIR_KEYWORDS	electron transport	5	1.9685	0.0430597	FDX1, NDUFA9, SDHD, TXNRD1, ETFA	254	100	19235	3.78642	0.999999	0.376256	44.6444
GOTERM_BP_FAT	GO:0022900~electron transport chain	5	1.9685	0.0989077	FDX1, NDUFA9, SDHD, TXNRD1, ETFA	209	114	13528	2.83892	1	0.891155	81.7376
Annotation Cluster 17	Enrichment Score: 1.466509408161308
Category	Term	Count	%	PValue	Genes	List Total	Pop Hits	Pop Total	Fold Enrichment	Bonferroni	Benjamini	FDR
SP_PIR_KEYWORDS	manganese	7	2.75591	0.0154125	LAP3, NUDT18, NUDT4, NUDT9, REXO2, IDH3A, XPNPEP1	254	152	19235	3.48749	0.992018	0.189437	18.8362
UP_SEQ_FEATURE	metal ion-binding site:Magnesium or manganese	3	1.1811	0.0208241	NUDT18, NUDT4, IDH3A	254	17	19113	13.2791	1	0.682637	27.2324
GOTERM_MF_FAT	GO:0030145~manganese ion binding	7	2.75591	0.0257185	LAP3, NUDT18, NUDT4, NUDT9, REXO2, IDH3A, XPNPEP1	191	154	12983	3.08972	0.999994	0.69993	30.9977
UP_SEQ_FEATURE	short sequence motif:Nudix box	3	1.1811	0.031063	NUDT18, NUDT4, NUDT9	254	21	19113	10.7497	1	0.774973	37.9167
SP_PIR_KEYWORDS	magnesium	12	4.72441	0.0326289	PGM2, LAP3, ATP2B1, ADPRHL2, NUDT18, NUDT4, NUDT9, ADK, RHEB, PINK1, PRPS1L1, IDH3A	254	442	19235	2.05597	0.999967	0.327532	35.9641
INTERPRO	IPR000086:NUDIX hydrolase, core	3	1.1811	0.043846	NUDT18, NUDT4, NUDT9	244	23	16659	8.90538	1	0.943591	47.6904
UP_SEQ_FEATURE	domain:Nudix hydrolase	3	1.1811	0.046052	NUDT18, NUDT4, NUDT9	254	26	19113	8.68247	1	0.860022	50.944
INTERPRO	IPR000086:NUDIX hydrolase domain	3	1.1811	0.0547519	NUDT18, NUDT4, NUDT9	244	26	16659	7.87784	1	0.959625	55.6821
GOTERM_MF_FAT	GO:0000287~magnesium ion binding	12	4.72441	0.0684395	PGM2, LAP3, ATP2B1, ADPRHL2, NUDT18, NUDT4, NUDT9, ADK, RHEB, PINK1, PRPS1L1, IDH3A	191	452	12983	1.80461	1	0.870887	63.5619

## Sheet: Tabel S6D-ER-FDR0.2-2nd
Table S6D (related to Figure 6): Functional annotation of the 2nd group of genes of the heatmap (Figure 6B) by DAVID
Annotation Cluster 1	Enrichment Score: 3.9729111842909837
Category	Term	Count	%	PValue	Genes	List Total	Pop Hits	Pop Total	Fold Enrichment	Bonferroni	Benjamini	FDR
SP_PIR_KEYWORDS	atp-binding	25	18.5185	1.4e-05	PGS1, FGFR3, DTYMK, EPHB4, SRC, DTD1, DDX27, TOR1A, UCK1, CDK16, STK24, CNKSR3, ACLY, MCM4, DAPK3, MCM6, ATP13A1, CBWD1, RFC4, NME1, ARAF, DDX50, HSPA13, DHX40, UBE2S	135	1326	19235	2.6863	0.00303153	0.00151692	0.0177693
GOTERM_MF_FAT	GO:0000166~nucleotide binding	34	25.1852	2.38e-05	PGS1, ME2, FGFR3, DTYMK, EPHB4, SRC, DTD1, DDX27, TOR1A, UCK1, MRPL39, CDK16, RAP2A, CTBP2, STK24, CNKSR3, ACLY, MCM4, DAPK3, MCM6, HNRNPH3, CBWD1, RFC4, ATP13A1, TAF15, NME1, SQLE, ARAF, DDX50, CPNE1, DHX40, HSPA13, UBE2S, NKIRAS2	95	2245	12983	2.06973	0.00636202	0.00636202	0.0312709
UP_SEQ_FEATURE	nucleotide phosphate-binding region:ATP	20	14.8148	4.2e-05	PGS1, FGFR3, STK24, CNKSR3, DTYMK, ACLY, EPHB4, MCM4, DAPK3, SRC, MCM6, DDX27, RFC4, CBWD1, ARAF, TOR1A, DDX50, UCK1, DHX40, CDK16	135	962	19113	2.9434	0.020332	0.020332	0.0602848
SP_PIR_KEYWORDS	nucleotide-binding	27	20	9.05e-05	PGS1, FGFR3, DTYMK, EPHB4, SRC, DTD1, DDX27, TOR1A, UCK1, CDK16, RAP2A, STK24, CNKSR3, ACLY, MCM4, DAPK3, MCM6, ATP13A1, CBWD1, RFC4, NME1, ARAF, DDX50, DHX40, HSPA13, UBE2S, NKIRAS2	135	1686	19235	2.28173	0.0194507	0.00652606	0.114903
GOTERM_MF_FAT	GO:0005524~ATP binding	25	18.5185	9.91e-05	PGS1, FGFR3, DTYMK, EPHB4, SRC, DTD1, DDX27, TOR1A, UCK1, CDK16, STK24, CNKSR3, ACLY, MCM4, DAPK3, MCM6, ATP13A1, CBWD1, RFC4, NME1, ARAF, DDX50, HSPA13, DHX40, UBE2S	95	1477	12983	2.31319	0.0262175	0.0131958	0.130105
GOTERM_MF_FAT	GO:0030554~adenyl nucleotide binding	26	19.2593	0.000102	PGS1, FGFR3, DTYMK, EPHB4, SRC, DTD1, DDX27, TOR1A, UCK1, CDK16, STK24, CNKSR3, ACLY, MCM4, DAPK3, MCM6, ATP13A1, CBWD1, RFC4, SQLE, NME1, ARAF, DDX50, HSPA13, DHX40, UBE2S	95	1577	12983	2.25317	0.0268535	0.0090325	0.133302
GOTERM_MF_FAT	GO:0032559~adenyl ribonucleotide binding	25	18.5185	0.000122	PGS1, FGFR3, DTYMK, EPHB4, SRC, DTD1, DDX27, TOR1A, UCK1, CDK16, STK24, CNKSR3, ACLY, MCM4, DAPK3, MCM6, ATP13A1, CBWD1, RFC4, NME1, ARAF, DDX50, HSPA13, DHX40, UBE2S	95	1497	12983	2.28228	0.0322807	0.00816975	0.160667
GOTERM_MF_FAT	GO:0001883~purine nucleoside binding	26	19.2593	0.00013	PGS1, FGFR3, DTYMK, EPHB4, SRC, DTD1, DDX27, TOR1A, UCK1, CDK16, STK24, CNKSR3, ACLY, MCM4, DAPK3, MCM6, ATP13A1, CBWD1, RFC4, SQLE, NME1, ARAF, DDX50, HSPA13, DHX40, UBE2S	95	1601	12983	2.21939	0.0341477	0.00692479	0.170115
GOTERM_MF_FAT	GO:0001882~nucleoside binding	26	19.2593	0.000145	PGS1, FGFR3, DTYMK, EPHB4, SRC, DTD1, DDX27, TOR1A, UCK1, CDK16, STK24, CNKSR3, ACLY, MCM4, DAPK3, MCM6, ATP13A1, CBWD1, RFC4, SQLE, NME1, ARAF, DDX50, HSPA13, DHX40, UBE2S	95	1612	12983	2.20424	0.0380371	0.00644239	0.189852
GOTERM_MF_FAT	GO:0017076~purine nucleotide binding	28	20.7407	0.000365	PGS1, FGFR3, DTYMK, EPHB4, SRC, DTD1, DDX27, TOR1A, UCK1, CDK16, RAP2A, STK24, CNKSR3, ACLY, MCM4, DAPK3, MCM6, ATP13A1, CBWD1, RFC4, SQLE, NME1, ARAF, DDX50, DHX40, HSPA13, UBE2S, NKIRAS2	95	1918	12983	1.99508	0.0932885	0.0138927	0.478748
GOTERM_MF_FAT	GO:0032553~ribonucleotide binding	27	20	0.000444	PGS1, FGFR3, DTYMK, EPHB4, SRC, DTD1, DDX27, TOR1A, UCK1, CDK16, RAP2A, STK24, CNKSR3, ACLY, MCM4, DAPK3, MCM6, ATP13A1, CBWD1, RFC4, NME1, ARAF, DDX50, DHX40, HSPA13, UBE2S, NKIRAS2	95	1836	12983	2.00975	0.112317	0.0147822	0.582131
GOTERM_MF_FAT	GO:0032555~purine ribonucleotide binding	27	20	0.000444	PGS1, FGFR3, DTYMK, EPHB4, SRC, DTD1, DDX27, TOR1A, UCK1, CDK16, RAP2A, STK24, CNKSR3, ACLY, MCM4, DAPK3, MCM6, ATP13A1, CBWD1, RFC4, NME1, ARAF, DDX50, DHX40, HSPA13, UBE2S, NKIRAS2	95	1836	12983	2.00975	0.112317	0.0147822	0.582131
Annotation Cluster 2	Enrichment Score: 2.8847336327486537
Category	Term	Count	%	PValue	Genes	List Total	Pop Hits	Pop Total	Fold Enrichment	Bonferroni	Benjamini	FDR
SP_PIR_KEYWORDS	endoplasmic reticulum	16	11.8519	0.000135	PACS2, NPLOC4, CYP51A1, SPTLC3, MOGS, BFAR, PSMG1, DNAJB11, SQLE, BACE2, TMEM43, TOR1A, DPM1, SEC22B, HSPA13, AUP1	135	713	19235	3.19734	0.0289639	0.00732099	0.171885
GOTERM_CC_FAT	GO:0005783~endoplasmic reticulum	19	14.0741	0.000325	PACS2, PGS1, NPLOC4, CYP51A1, SPTLC3, MOGS, BFAR, PSMG1, DNAJB11, SQLE, BACE2, CNIH4, TMEM43, TOR1A, DPM1, SEC22B, HSPA13, AGPAT1, AUP1	99	960	12782	2.55532	0.0576906	0.0576906	0.40026
GOTERM_CC_FAT	GO:0044432~endoplasmic reticulum part	7	5.18519	0.0504245	PACS2, DNAJB11, CYP51A1, SPTLC3, SQLE, TOR1A, DPM1	99	347	12782	2.60455	0.999923	0.577163	47.2216
Annotation Cluster 3	Enrichment Score: 1.7414641603788135
Category	Term	Count	%	PValue	Genes	List Total	Pop Hits	Pop Total	Fold Enrichment	Bonferroni	Benjamini	FDR
KEGG_PATHWAY	hsa03030:DNA replication	5	3.7037	0.000357	RPA1, RFC4, PCNA, MCM4, MCM6	50	36	5085	14.125	0.0261078	0.0261078	0.37348
SP_PIR_KEYWORDS	dna replication	6	4.44444	0.000375	RPA1, RFC4, RRM2, PCNA, MCM4, MCM6	135	88	19235	9.71465	0.0782416	0.0161624	0.475731
GOTERM_MF_FAT	GO:0043566~structure-specific DNA binding	7	5.18519	0.000636	RPA1, HMGB2, NOTCH1, RAD23A, PCNA, MCM4, MCM6	95	145	12983	6.59753	0.156709	0.01876	0.831757
GOTERM_MF_FAT	GO:0003697~single-stranded DNA binding	5	3.7037	0.000663	RPA1, HMGB2, RAD23A, MCM4, MCM6	95	55	12983	12.4239	0.162766	0.0176083	0.866779
GOTERM_BP_FAT	GO:0006261~DNA-dependent DNA replication	5	3.7037	0.000814	RPA1, HMGB2, RFC4, MCM4, MCM6	99	58	13528	11.7799	0.545838	0.545838	1.27362
GOTERM_BP_FAT	GO:0006260~DNA replication	7	5.18519	0.0025633	RPA1, HMGB2, RFC4, RRM2, PCNA, MCM4, MCM6	99	190	13528	5.03434	0.916843	0.563518	3.95838
GOTERM_BP_FAT	GO:0006268~DNA unwinding during replication	3	2.22222	0.00446643	HMGB2, MCM4, MCM6	99	14	13528	29.2814	0.986933	0.661901	6.80186
GOTERM_BP_FAT	GO:0006297~nucleotide-excision repair, DNA gap filling	3	2.22222	0.00658146	RPA1, RFC4, PCNA	99	17	13528	24.1141	0.998336	0.72188	9.86936
INTERPRO	IPR012340:Nucleic acid-binding, OB-fold	4	2.96296	0.00703331	RPA1, OBFC1, MCM4, MCM6	124	53	16659	10.1394	0.890984	0.890984	9.06035
GOTERM_BP_FAT	GO:0006289~nucleotide-excision repair	4	2.96296	0.0073652	RPA1, RFC4, RAD23A, PCNA	99	55	13528	9.93792	0.999225	0.696957	10.9818
GOTERM_BP_FAT	GO:0032392~DNA geometric change	3	2.22222	0.00736939	HMGB2, MCM4, MCM6	99	18	13528	22.7744	0.999229	0.640813	10.9878
GOTERM_BP_FAT	GO:0032508~DNA duplex unwinding	3	2.22222	0.00736939	HMGB2, MCM4, MCM6	99	18	13528	22.7744	0.999229	0.640813	10.9878
KEGG_PATHWAY	hsa03420:Nucleotide excision repair	4	2.96296	0.00844121	RPA1, RFC4, RAD23A, PCNA	50	44	5085	9.24545	0.465969	0.188686	8.49042
GOTERM_BP_FAT	GO:0006974~response to DNA damage stimulus	8	5.92593	0.0185894	RPA1, CDKN1A, HMGB2, RAD21, UACA, RFC4, RAD23A, PCNA	99	373	13528	2.93076	1	0.72713	25.5678
KEGG_PATHWAY	hsa03430:Mismatch repair	3	2.22222	0.0202315	RPA1, RFC4, PCNA	50	23	5085	13.2652	0.779638	0.314852	19.2594
GOTERM_CC_FAT	GO:0005657~replication fork	3	2.22222	0.0248574	RPA1, RFC4, PCNA	99	32	12782	12.1042	0.990012	0.535936	26.7217
GOTERM_BP_FAT	GO:0048015~phosphoinositide-mediated signaling	4	2.96296	0.0259754	HMGB2, RFC4, PCNA, BUD31	99	88	13528	6.2112	1	0.796873	33.9104
GOTERM_BP_FAT	GO:0006259~DNA metabolic process	9	6.66667	0.0303109	RPA1, HMGB2, RAD21, RFC4, RRM2, RAD23A, PCNA, MCM4, MCM6	99	506	13528	2.43047	1	0.791906	38.3908
KEGG_PATHWAY	hsa04110:Cell cycle	5	3.7037	0.0314771	CDKN1A, RAD21, PCNA, MCM4, MCM6	50	125	5085	4.068	0.906215	0.325955	28.4488
GOTERM_BP_FAT	GO:0006281~DNA repair	6	4.44444	0.0553417	RPA1, HMGB2, RAD21, RFC4, RAD23A, PCNA	99	284	13528	2.8869	1	0.831292	59.1759
GOTERM_BP_FAT	GO:0019932~second-messenger-mediated signaling	5	3.7037	0.0911226	HMGB2, RFC4, PCNA, FZD2, BUD31	99	235	13528	2.90737	1	0.906886	77.7655
GOTERM_BP_FAT	GO:0033554~cellular response to stress	8	5.92593	0.116135	RPA1, CDKN1A, HMGB2, RAD21, UACA, RFC4, RAD23A, PCNA	99	566	13528	1.9314	1	0.904208	85.6679
GOTERM_CC_FAT	GO:0005654~nucleoplasm	11	8.14815	0.137769	TAF11, RPA1, CDKN1A, HMGB2, CTBP2, RFC4, STK24, PCNA, MED22, MCM4, MCM6	99	882	12782	1.61023	1	0.778432	83.9728
GOTERM_CC_FAT	GO:0000228~nuclear chromosome	3	2.22222	0.353388	RPA1, HMGB2, RAD21	99	162	12782	2.39095	1	0.897685	99.5417
GOTERM_CC_FAT	GO:0005694~chromosome	5	3.7037	0.471632	RPA1, HMGB2, RAD21, RFC4, PCNA	99	460	12782	1.40338	1	0.949889	99.9622
GOTERM_CC_FAT	GO:0044427~chromosomal part	3	2.22222	0.800448	RPA1, RFC4, PCNA	99	386	12782	1.00345	1	0.995754	100
GOTERM_MF_FAT	GO:0003677~DNA binding	14	10.3704	0.8839	HMGB2, RAD23A, CIC, MCM4, BUD31, MCM6, RPA1, TAF11, NOTCH1, RFC4, TAF15, HSF1, NME1, PCNA	95	2331	12983	0.8208	1	1	100
SP_PIR_KEYWORDS	dna-binding	9	6.66667	0.955037	RPA1, HMGB2, HSF1, TAF15, NME1, PCNA, CIC, MCM4, MCM6	135	1868	19235	0.686474	1	0.999963	100
Annotation Cluster 4	Enrichment Score: 1.411894992654384
Category	Term	Count	%	PValue	Genes	List Total	Pop Hits	Pop Total	Fold Enrichment	Bonferroni	Benjamini	FDR
GOTERM_BP_FAT	GO:0008610~lipid biosynthetic process	9	6.66667	0.00236628	PGS1, CYP51A1, SPTLC3, SQLE, MBOAT7, DPM1, HMGCS1, ACLY, AGPAT1	99	323	13528	3.80749	0.899303	0.682673	3.65942
SP_PIR_KEYWORDS	phospholipid biosynthesis	3	2.22222	0.0345922	PGS1, MBOAT7, AGPAT1	135	42	19235	10.1772	0.999519	0.444367	36.0548
GOTERM_BP_FAT	GO:0008654~phospholipid biosynthetic process	4	2.96296	0.0378271	PGS1, MBOAT7, DPM1, AGPAT1	99	102	13528	5.35868	1	0.803009	45.4913
GOTERM_BP_FAT	GO:0006644~phospholipid metabolic process	4	2.96296	0.159208	PGS1, MBOAT7, DPM1, AGPAT1	99	190	13528	2.87677	1	0.93637	93.4705
GOTERM_BP_FAT	GO:0019637~organophosphate metabolic process	4	2.96296	0.176894	PGS1, MBOAT7, DPM1, AGPAT1	99	200	13528	2.73293	1	0.937591	95.3271
Annotation Cluster 5	Enrichment Score: 1.3347230152487146
Category	Term	Count	%	PValue	Genes	List Total	Pop Hits	Pop Total	Fold Enrichment	Bonferroni	Benjamini	FDR
GOTERM_BP_FAT	GO:0016126~sterol biosynthetic process	3	2.22222	0.0264668	CYP51A1, SQLE, HMGCS1	99	35	13528	11.7126	1	0.783233	34.4332
GOTERM_BP_FAT	GO:0008203~cholesterol metabolic process	4	2.96296	0.0291212	LDLR, CYP51A1, SQLE, HMGCS1	99	92	13528	5.94115	1	0.796272	37.1905
GOTERM_BP_FAT	GO:0016125~sterol metabolic process	4	2.96296	0.0369029	LDLR, CYP51A1, SQLE, HMGCS1	99	101	13528	5.41174	1	0.809128	44.6615
GOTERM_BP_FAT	GO:0008202~steroid metabolic process	5	3.7037	0.059051	OSBPL2, LDLR, CYP51A1, SQLE, HMGCS1	99	202	13528	3.38234	1	0.832581	61.6268
GOTERM_BP_FAT	GO:0006694~steroid biosynthetic process	3	2.22222	0.126237	CYP51A1, SQLE, HMGCS1	99	85	13528	4.82282	1	0.91911	88.0393

## Sheet: Tabel S6E-ER-FDR0.2-3rd
Table S6E (related to Figure 6): Functional annotation of the 3rd group of genes of the heatmap (Figure 6B) by DAVID
Annotation Cluster 1	Enrichment Score: 3.391609845031411
Category	Term	Count	%	PValue	Genes	List Total	Pop Hits	Pop Total	Fold Enrichment	Bonferroni	Benjamini	FDR
GOTERM_MF_FAT	GO:0017076~purine nucleotide binding	58	16.2921	5.15e-05	SPG7, CLPB, LDHD, PRKAG2, DAK, PIP5K1B, RPS6KB2, ACSS3, DDR2, IGHMBP2, GSS, MAP3K6, GSR, ATAD3A, NOD2, DDX28, DHX38, RAB24, SIK2, TUBB3, ABCC11, PFKM, PANK4, ATP2C2, RAB15, STEAP2, STEAP1, DUS2L, EIF2AK4, PRKCZ, GNE, ACTR3B, CHKB, ABCD1, PFKFB2, MAP4K2, ADRBK2, NLRX1, WARS2, RIOK2, KTI12, CPT1B, MSH3, MYO1B, MAP2K3, MTHFSD, DRG2, ATP13A2, RABL2B, RERG, TUBA8, RAB30, RHOT2, TEP1, DGKZ, FUK, IKBKB,…	233	1918	12983	1.68499	0.029228	0.029228	0.075607
GOTERM_MF_FAT	GO:0001883~purine nucleoside binding	50	14.0449	9.76e-05	SPG7, CLPB, PRKAG2, DAK, LDHD, PIP5K1B, RPS6KB2, DDR2, ACSS3, IGHMBP2, GSS, MAP3K6, GSR, ATAD3A, NOD2, DDX28, DHX38, SIK2, ABCC11, PFKM, PANK4, ATP2C2, STEAP2, STEAP1, DUS2L, EIF2AK4, PRKCZ, ACTR3B, GNE, ABCD1, PFKFB2, CHKB, MAP4K2, ADRBK2, NLRX1, WARS2, RIOK2, KTI12, CPT1B, MSH3, MYO1B, MAP2K3, MTHFSD, ATP13A2, RERG, TEP1, DGKZ, FUK, IKBKB, ACSM5, PC	233	1601	12983	1.74019	0.054658	0.027713	0.143217
GOTERM_MF_FAT	GO:0001882~nucleoside binding	50	14.0449	0.000116	SPG7, CLPB, PRKAG2, DAK, LDHD, PIP5K1B, RPS6KB2, DDR2, ACSS3, IGHMBP2, GSS, MAP3K6, GSR, ATAD3A, NOD2, DDX28, DHX38, SIK2, ABCC11, PFKM, PANK4, ATP2C2, STEAP2, STEAP1, DUS2L, EIF2AK4, PRKCZ, ACTR3B, GNE, ABCD1, PFKFB2, CHKB, MAP4K2, ADRBK2, NLRX1, WARS2, RIOK2, KTI12, CPT1B, MSH3, MYO1B, MAP2K3, MTHFSD, ATP13A2, RERG, TEP1, DGKZ, FUK, IKBKB, ACSM5, PC	233	1612	12983	1.72832	0.0644464	0.0219609	0.169714
GOTERM_MF_FAT	GO:0030554~adenyl nucleotide binding	49	13.764	0.000134	SPG7, CLPB, PRKAG2, DAK, LDHD, PIP5K1B, RPS6KB2, DDR2, ACSS3, IGHMBP2, GSS, MAP3K6, GSR, ATAD3A, NOD2, DDX28, DHX38, SIK2, ABCC11, PFKM, PANK4, ATP2C2, STEAP2, STEAP1, DUS2L, EIF2AK4, PRKCZ, ACTR3B, GNE, ABCD1, PFKFB2, CHKB, MAP4K2, ADRBK2, NLRX1, WARS2, RIOK2, KTI12, CPT1B, MSH3, MYO1B, MAP2K3, MTHFSD, ATP13A2, TEP1, DGKZ, FUK, IKBKB, ACSM5, PC	233	1577	12983	1.73134	0.0741452	0.0190752	0.196237
GOTERM_MF_FAT	GO:0032555~purine ribonucleotide binding	53	14.8876	0.000403	SPG7, CLPB, PRKAG2, DAK, PIP5K1B, RPS6KB2, ACSS3, DDR2, IGHMBP2, GSS, MAP3K6, ATAD3A, NOD2, DDX28, DHX38, RAB24, SIK2, TUBB3, ABCC11, PFKM, PANK4, ATP2C2, RAB15, EIF2AK4, PRKCZ, GNE, ACTR3B, CHKB, ABCD1, PFKFB2, MAP4K2, ADRBK2, NLRX1, WARS2, RIOK2, KTI12, CPT1B, MSH3, MYO1B, MAP2K3, MTHFSD, DRG2, ATP13A2, RABL2B, RERG, TUBA8, RAB30, TEP1, RHOT2, DGKZ, FUK, IKBKB, ACSM5, PC	233	1836	12983	1.6085	0.207228	0.0453819	0.590359
GOTERM_MF_FAT	GO:0032553~ribonucleotide binding	53	14.8876	0.000403	SPG7, CLPB, PRKAG2, DAK, PIP5K1B, RPS6KB2, ACSS3, DDR2, IGHMBP2, GSS, MAP3K6, ATAD3A, NOD2, DDX28, DHX38, RAB24, SIK2, TUBB3, ABCC11, PFKM, PANK4, ATP2C2, RAB15, EIF2AK4, PRKCZ, GNE, ACTR3B, CHKB, ABCD1, PFKFB2, MAP4K2, ADRBK2, NLRX1, WARS2, RIOK2, KTI12, CPT1B, MSH3, MYO1B, MAP2K3, MTHFSD, DRG2, ATP13A2, RABL2B, RERG, TUBA8, RAB30, TEP1, RHOT2, DGKZ, FUK, IKBKB, ACSM5, PC	233	1836	12983	1.6085	0.207228	0.0453819	0.590359
SP_PIR_KEYWORDS	nucleotide-binding	51	14.3258	0.000555	SPG7, CLPB, DAK, PIP5K1B, RPS6KB2, DDR2, ACSS3, IGHMBP2, GSS, MAP3K6, ATAD3A, NOD2, DDX28, DHX38, RAB24, SIK2, TUBB3, ABCC11, PFKM, PANK4, ATP2C2, RAB15, EIF2AK4, PRKCZ, ACTR3B, GNE, CHKB, ABCD1, PFKFB2, MAP4K2, ADRBK2, NLRX1, WARS2, RIOK2, KTI12, CPT1B, MSH3, MYO1B, MAP2K3, DRG2, ATP13A2, RABL2B, RERG, TUBA8, RAB30, TEP1, RHOT2, DGKZ, FUK, IKBKB, ACSM5, PC	356	1686	19235	1.63439	0.165191	0.0584089	0.748618
GOTERM_MF_FAT	GO:0000166~nucleotide binding	61	17.1348	0.000603	SPG7, CPEB2, CLPB, LDHD, PRKAG2, DAK, PIP5K1B, RPS6KB2, RBM7, ACSS3, DDR2, IGHMBP2, GSS, MAP3K6, GSR, ATAD3A, NOD2, DDX28, DHX38, RAB24, SIK2, TUBB3, ABCC11, PFKM, PANK4, ATP2C2, RAB15, ESRP2, STEAP2, STEAP1, DUS2L, EIF2AK4, PRKCZ, GNE, ACTR3B, CHKB, ABCD1, PFKFB2, MAP4K2, ADRBK2, NLRX1, WARS2, RIOK2, KTI12, CPT1B, MSH3, MYO1B, MAP2K3, MTHFSD, DRG2, ATP13A2, RABL2B, RERG, TUBA8, RAB30, RHOT2, TEP…	233	2245	12983	1.51402	0.293546	0.056271	0.882127
GOTERM_MF_FAT	GO:0005524~ATP binding	44	12.3596	0.000816	PRKCZ, SPG7, ACTR3B, GNE, CHKB, CLPB, PFKFB2, ABCD1, PRKAG2, DAK, MAP4K2, PIP5K1B, ADRBK2, RPS6KB2, NLRX1, WARS2, ACSS3, RIOK2, DDR2, GSS, IGHMBP2, MAP3K6, NOD2, ATAD3A, DDX28, DHX38, KTI12, SIK2, CPT1B, MSH3, MYO1B, MAP2K3, ABCC11, MTHFSD, PFKM, ATP13A2, PANK4, ATP2C2, TEP1, DGKZ, FUK, IKBKB, ACSM5, EIF2AK4, PC	233	1477	12983	1.65994	0.375091	0.0649583	1.19162
SP_PIR_KEYWORDS	atp-binding	42	11.7978	0.000817	PRKCZ, SPG7, ACTR3B, GNE, CHKB, CLPB, PFKFB2, ABCD1, DAK, MAP4K2, PIP5K1B, ADRBK2, RPS6KB2, NLRX1, WARS2, ACSS3, RIOK2, DDR2, IGHMBP2, GSS, MAP3K6, NOD2, ATAD3A, DDX28, DHX38, KTI12, SIK2, CPT1B, MSH3, MYO1B, MAP2K3, ABCC11, PFKM, ATP13A2, PANK4, ATP2C2, TEP1, DGKZ, FUK, IKBKB, ACSM5, EIF2AK4, PC	356	1326	19235	1.71139	0.233359	0.0642754	1.09986
GOTERM_MF_FAT	GO:0032559~adenyl ribonucleotide binding	44	12.3596	0.00107093	PRKCZ, SPG7, ACTR3B, GNE, CHKB, CLPB, PFKFB2, ABCD1, PRKAG2, DAK, MAP4K2, PIP5K1B, ADRBK2, RPS6KB2, NLRX1, WARS2, ACSS3, RIOK2, DDR2, GSS, IGHMBP2, MAP3K6, NOD2, ATAD3A, DDX28, DHX38, KTI12, SIK2, CPT1B, MSH3, MYO1B, MAP2K3, ABCC11, MTHFSD, PFKM, ATP13A2, PANK4, ATP2C2, TEP1, DGKZ, FUK, IKBKB, ACSM5, EIF2AK4, PC	233	1497	12983	1.63776	0.46054	0.0742474	1.56137
UP_SEQ_FEATURE	nucleotide phosphate-binding region:ATP	30	8.42697	0.00661578	PRKCZ, SPG7, GNE, CHKB, CLPB, PFKFB2, ABCD1, DAK, MAP4K2, ADRBK2, RPS6KB2, NLRX1, DDR2, IGHMBP2, GSS, MAP3K6, NOD2, ATAD3A, DDX28, KTI12, DHX38, SIK2, CPT1B, MSH3, MAP2K3, PFKM, TEP1, FUK, IKBKB, ACSM5, EIF2AK4	354	962	19113	1.68373	0.997757	0.952644	9.85452
Annotation Cluster 2	Enrichment Score: 1.9951238336198607
Category	Term	Count	%	PValue	Genes	List Total	Pop Hits	Pop Total	Fold Enrichment	Bonferroni	Benjamini	FDR
GOTERM_CC_FAT	GO:0042579~microbody	8	2.24719	0.00288475	HACL1, NUDT12, ABCD1, EHHADH, PEX16, PEX14, MPV17, PEX7	236	103	12782	4.20668	0.564826	0.564826	3.76377
GOTERM_CC_FAT	GO:0005777~peroxisome	8	2.24719	0.00288475	HACL1, NUDT12, ABCD1, EHHADH, PEX16, PEX14, MPV17, PEX7	236	103	12782	4.20668	0.564826	0.564826	3.76377
GOTERM_BP_FAT	GO:0009062~fatty acid catabolic process	5	1.40449	0.00298475	CPT1B, HACL1, CHKB, ABCD1, EHHADH, PEX7	228	36	13528	8.24074	0.989678	0.78227	4.85668
GOTERM_BP_FAT	GO:0034440~lipid oxidation	5	1.40449	0.00400772	CPT1B, HACL1, CHKB, ABCD1, EHHADH, PEX7	228	39	13528	7.60684	0.997854	0.784766	6.46956
GOTERM_BP_FAT	GO:0019395~fatty acid oxidation	5	1.40449	0.00400772	CPT1B, HACL1, CHKB, ABCD1, EHHADH, PEX7	228	39	13528	7.60684	0.997854	0.784766	6.46956
SP_PIR_KEYWORDS	peroxisome	7	1.96629	0.00643358	HACL1, NUDT12, ABCD1, EHHADH, PEX16, PEX14, PEX7	356	90	19235	4.2024	0.877258	0.258935	8.35996
GOTERM_BP_FAT	GO:0016042~lipid catabolic process	9	2.52809	0.00883351	CPT1B, HACL1, DAGLA, GLA, CHKB, ABCD1, EHHADH, PLA2G6, PHLDB2, PEX7	228	173	13528	3.08671	0.999999	0.816752	13.7377
GOTERM_BP_FAT	GO:0044242~cellular lipid catabolic process	6	1.68539	0.00895945	CPT1B, HACL1, GLA, CHKB, ABCD1, EHHADH, PEX7	228	76	13528	4.68421	0.999999	0.783458	13.92
GOTERM_BP_FAT	GO:0006635~fatty acid beta-oxidation	4	1.1236	0.0112113	CPT1B, CHKB, ABCD1, EHHADH, PEX7	228	28	13528	8.47619	1	0.79158	17.1204
GOTERM_BP_FAT	GO:0030258~lipid modification	5	1.40449	0.0285872	CPT1B, HACL1, CHKB, ABCD1, EHHADH, PEX7	228	69	13528	4.29952	1	0.903245	38.3109
GOTERM_BP_FAT	GO:0016054~organic acid catabolic process	6	1.68539	0.0390246	AMDHD1, CPT1B, HACL1, CHKB, ABCD1, EHHADH, PEX7	228	111	13528	3.20721	1	0.929207	48.4688
GOTERM_BP_FAT	GO:0046395~carboxylic acid catabolic process	6	1.68539	0.0390246	AMDHD1, CPT1B, HACL1, CHKB, ABCD1, EHHADH, PEX7	228	111	13528	3.20721	1	0.929207	48.4688
GOTERM_BP_FAT	GO:0006631~fatty acid metabolic process	7	1.96629	0.116707	CPT1B, HACL1, CHKB, ABCD1, EHHADH, PRKAG2, ACSM5, PEX7	228	198	13528	2.09764	1	0.955517	87.3421
Annotation Cluster 3	Enrichment Score: 1.6212915229556353
Category	Term	Count	%	PValue	Genes	List Total	Pop Hits	Pop Total	Fold Enrichment	Bonferroni	Benjamini	FDR
SP_PIR_KEYWORDS	FAD	10	2.80899	0.000265	GSR, MTHFR, PYROXD2, MAOA, DAK, LDHD, FOXRED1, STEAP2, STEAP1, DUS2L	356	114	19235	4.73955	0.0826668	0.0422249	0.35846
SP_PIR_KEYWORDS	Flavoprotein	8	2.24719	0.00370443	GSR, MTHFR, MAOA, LDHD, FOXRED1, STEAP2, STEAP1, DUS2L	356	107	19235	4.03969	0.700661	0.214343	4.89602
GOTERM_MF_FAT	GO:0048037~cofactor binding	10	2.80899	0.0349873	AGXT2L2, HACL1, GSR, CSAD, EHHADH, LDHD, STEAP2, STEAP1, DUS2L, WWOX	233	249	12983	2.23779	1	0.768982	40.7291
GOTERM_MF_FAT	GO:0050660~FAD binding	5	1.40449	0.0397951	GSR, LDHD, STEAP2, STEAP1, DUS2L	233	72	12983	3.86952	1	0.789731	44.9212
GOTERM_BP_FAT	GO:0055114~oxidation reduction	18	5.05618	0.0409719	SEPX1, PYROXD2, MAOA, EHHADH, LDHD, SLC25A12, DHRS1, BLVRA, GSR, MTHFR, HSD11B1, FOXRED1, STEAP2, ALKBH3, STEAP1, DUS2L, WWOX, BCO2	228	639	13528	1.67136	1	0.930538	50.1807
GOTERM_MF_FAT	GO:0050662~coenzyme binding	8	2.24719	0.0439749	HACL1, GSR, EHHADH, LDHD, STEAP2, STEAP1, DUS2L, WWOX	233	181	12983	2.46281	1	0.801895	48.3395
SP_PIR_KEYWORDS	oxidoreductase	17	4.77528	0.0571481	SEPX1, PYROXD2, MAOA, EHHADH, LDHD, DHRS1, BLVRA, GSR, MTHFR, HSD11B1, FOXRED1, STEAP2, ALKBH3, STEAP1, DUS2L, WWOX, BCO2	356	562	19235	1.63439	1	0.720568	54.8849
GOTERM_MF_FAT	GO:0009055~electron carrier activity	4	1.1236	0.75949	GSR, MAOA, STEAP2, STEAP1	233	221	12983	1.00853	1	0.999728	100
Annotation Cluster 4	Enrichment Score: 1.5732799098423007
Category	Term	Count	%	PValue	Genes	List Total	Pop Hits	Pop Total	Fold Enrichment	Bonferroni	Benjamini	FDR
GOTERM_BP_FAT	GO:0043574~peroxisomal transport	4	1.1236	0.00182754	ABCD1, PEX16, PEX14, PEX7	228	15	13528	15.8222	0.939111	0.939111	3.00065
GOTERM_CC_FAT	GO:0005777~peroxisome	8	2.24719	0.00288475	HACL1, NUDT12, ABCD1, EHHADH, PEX16, PEX14, MPV17, PEX7	236	103	12782	4.20668	0.564826	0.564826	3.76377
GOTERM_CC_FAT	GO:0042579~microbody	8	2.24719	0.00288475	HACL1, NUDT12, ABCD1, EHHADH, PEX16, PEX14, MPV17, PEX7	236	103	12782	4.20668	0.564826	0.564826	3.76377
SP_PIR_KEYWORDS	peroxisome	7	1.96629	0.00643358	HACL1, NUDT12, ABCD1, EHHADH, PEX16, PEX14, PEX7	356	90	19235	4.2024	0.877258	0.258935	8.35996
GOTERM_BP_FAT	GO:0007031~peroxisome organization	4	1.1236	0.0064445	ABCD1, PEX16, PEX14, PEX7	228	23	13528	10.3188	0.999949	0.861709	10.2086
GOTERM_BP_FAT	GO:0016558~protein import into peroxisome matrix	3	0.842697	0.0115439	PEX16, PEX14, PEX7	228	10	13528	17.8	1	0.772454	17.5834
GOTERM_CC_FAT	GO:0005778~peroxisomal membrane	4	1.1236	0.0188785	ABCD1, PEX16, PEX14, MPV17	236	31	12782	6.98852	0.995868	0.746463	22.3609
GOTERM_CC_FAT	GO:0031903~microbody membrane	4	1.1236	0.0188785	ABCD1, PEX16, PEX14, MPV17	236	31	12782	6.98852	0.995868	0.746463	22.3609
GOTERM_BP_FAT	GO:0006625~protein targeting to peroxisome	3	0.842697	0.0223388	PEX16, PEX14, PEX7	228	14	13528	12.7143	1	0.853441	31.3586
GOTERM_CC_FAT	GO:0005779~integral to peroxisomal membrane	3	0.842697	0.0229738	ABCD1, PEX16, MPV17	236	13	12782	12.4987	0.998761	0.737821	26.556
GOTERM_CC_FAT	GO:0031231~intrinsic to peroxisomal membrane	3	0.842697	0.0229738	ABCD1, PEX16, MPV17	236	13	12782	12.4987	0.998761	0.737821	26.556
GOTERM_CC_FAT	GO:0044439~peroxisomal part	4	1.1236	0.0441905	ABCD1, PEX16, PEX14, MPV17	236	43	12782	5.03823	0.999998	0.844253	45.13
GOTERM_CC_FAT	GO:0044438~microbody part	4	1.1236	0.0441905	ABCD1, PEX16, PEX14, MPV17	236	43	12782	5.03823	0.999998	0.844253	45.13
GOTERM_CC_FAT	GO:0031300~intrinsic to organelle membrane	7	1.96629	0.0527286	RNF180, ABCD1, PEX16, CHST2, RHOT2, MPV17, STEAP2	236	146	12782	2.59676	1	0.823322	51.2937
UP_SEQ_FEATURE	short sequence motif:Microbody targeting signal	3	0.842697	0.175003	HACL1, NUDT12, EHHADH	354	41	19113	3.9506	1	0.999909	95.0547
GOTERM_CC_FAT	GO:0031301~integral to organelle membrane	5	1.40449	0.190718	ABCD1, PEX16, RHOT2, MPV17, STEAP2	236	123	12782	2.20167	1	0.937347	93.9802
GOTERM_BP_FAT	GO:0017038~protein import	3	0.842697	0.648872	PEX16, PEX14, PEX7	228	131	13528	1.35878	1	0.99887	100
GOTERM_BP_FAT	GO:0006605~protein targeting	4	1.1236	0.703276	PACS1, PEX16, PEX14, PEX7	228	215	13528	1.10388	1	0.999257	100
Annotation Cluster 5	Enrichment Score: 1.494148672777048
Category	Term	Count	%	PValue	Genes	List Total	Pop Hits	Pop Total	Fold Enrichment	Bonferroni	Benjamini	FDR
GOTERM_CC_FAT	GO:0005739~mitochondrion	31	8.70787	0.0160897	SPG7, MRPS15, NIT2, CHKB, EHHADH, LDHD, HINT2, NLRX1, MPV17, WARS2, ACSS3, AGXT2L2, GSR, DDX28, NUDT8, YRDC, LIAS, LACTB, MTUS1, WWOX, CPT1B, ATPAF2, MAOA, KIAA0141, MACROD1, SLC25A12, DHRS1, RHOT2, FOXRED1, ALKBH3, ACSM5, PC	236	1087	12782	1.54461	0.990642	0.789268	19.3786
SP_PIR_KEYWORDS	mitochondrion	25	7.02247	0.021008	SPG7, MRPS15, CHKB, HINT2, LDHD, NLRX1, MPV17, WARS2, ACSS3, AGXT2L2, GSR, DDX28, NUDT8, YRDC, LIAS, LACTB, MTUS1, WWOX, CPT1B, ATPAF2, MAOA, KIAA0141, SLC25A12, RHOT2, ACSM5, PC	356	832	19235	1.62352	0.998993	0.465969	24.9625
UP_SEQ_FEATURE	transit peptide:Mitochondrion	15	4.21348	0.0523888	ATPAF2, MRPS15, LDHD, HINT2, KIAA0141, NLRX1, WARS2, ACSS3, GSR, NUDT8, YRDC, LIAS, LACTB, ACSM5, PC	354	467	19113	1.7342	1	0.999949	56.874
SP_PIR_KEYWORDS	transit peptide	15	4.21348	0.0595985	ATPAF2, MRPS15, LDHD, HINT2, KIAA0141, NLRX1, WARS2, ACSS3, GSR, NUDT8, YRDC, LIAS, LACTB, ACSM5, PC	356	476	19235	1.70265	1	0.71297	56.4453
Annotation Cluster 6	Enrichment Score: 1.3288986531419091
Category	Term	Count	%	PValue	Genes	List Total	Pop Hits	Pop Total	Fold Enrichment	Bonferroni	Benjamini	FDR
GOTERM_BP_FAT	GO:0051347~positive regulation of transferase activity	11	3.08989	0.00729333	PRKCZ, MAP3K6, ACD, PRLR, PFKFB2, MAP2K3, CHRM1, PRKAG2, DGKZ, CHRNA7, TLR6	228	240	13528	2.71944	0.999986	0.845354	11.4778
GOTERM_BP_FAT	GO:0051338~regulation of transferase activity	14	3.93258	0.0102161	PRKCZ, MAP2K3, PFKFB2, PRKAG2, TLR6, DVL1, GPS2, MAP3K6, ACD, TSPYL2, PRLR, CHRM1, DGKZ, CHRNA7	228	372	13528	2.23297	1	0.792185	15.7201
GOTERM_BP_FAT	GO:0042325~regulation of phosphorylation	16	4.49438	0.0121526	PRKCZ, MAP2K3, PFKFB2, PRKAG2, TLR6, DVL1, GPS2, EDNRB, VEGFC, MAP3K6, NOD2, TSPYL2, PRLR, CHRM1, DGKZ, CHRNA7	228	466	13528	2.0372	1	0.762843	18.4247
GOTERM_BP_FAT	GO:0033674~positive regulation of kinase activity	10	2.80899	0.01624	PRKCZ, MAP3K6, PRLR, PFKFB2, MAP2K3, CHRM1, PRKAG2, DGKZ, CHRNA7, TLR6	228	231	13528	2.56854	1	0.811769	23.868
GOTERM_BP_FAT	GO:0051174~regulation of phosphorus metabolic process	16	4.49438	0.0168877	PRKCZ, MAP2K3, PFKFB2, PRKAG2, TLR6, DVL1, GPS2, EDNRB, VEGFC, MAP3K6, NOD2, TSPYL2, PRLR, CHRM1, DGKZ, CHRNA7	228	485	13528	1.95739	1	0.803811	24.6985
GOTERM_BP_FAT	GO:0019220~regulation of phosphate metabolic process	16	4.49438	0.0168877	PRKCZ, MAP2K3, PFKFB2, PRKAG2, TLR6, DVL1, GPS2, EDNRB, VEGFC, MAP3K6, NOD2, TSPYL2, PRLR, CHRM1, DGKZ, CHRNA7	228	485	13528	1.95739	1	0.803811	24.6985
GOTERM_BP_FAT	GO:0043549~regulation of kinase activity	13	3.65169	0.0175315	PRKCZ, MAP2K3, PFKFB2, PRKAG2, TLR6, DVL1, GPS2, MAP3K6, TSPYL2, PRLR, CHRM1, DGKZ, CHRNA7	228	357	13528	2.1606	1	0.796447	25.5156
GOTERM_BP_FAT	GO:0045859~regulation of protein kinase activity	12	3.37079	0.0313957	PRKCZ, MAP3K6, TSPYL2, PRLR, MAP2K3, CHRM1, PRKAG2, DGKZ, CHRNA7, TLR6, GPS2, DVL1	228	345	13528	2.06377	1	0.902126	41.2151
GOTERM_BP_FAT	GO:0045860~positive regulation of protein kinase activity	9	2.52809	0.0347443	PRKCZ, MAP3K6, PRLR, MAP2K3, CHRM1, PRKAG2, DGKZ, CHRNA7, TLR6	228	223	13528	2.39462	1	0.914504	44.5098
GOTERM_BP_FAT	GO:0007243~protein kinase cascade	12	3.37079	0.0479111	MAP3K6, PRLR, MAP2K3, PRKAG2, MAP4K2, RPS6KB2, CHRNA7, IKBKB, TLR6, TNIP2, SIK2, GPS2	228	370	13528	1.92432	1	0.931628	55.8562
GOTERM_BP_FAT	GO:0044093~positive regulation of molecular function	16	4.49438	0.0689773	PRKCZ, MSH3, MAP2K3, PFKFB2, PRKAG2, NR4A2, TLR6, EDNRB, MAP3K6, NOD2, ACD, PRLR, CHRM1, DGKZ, CHRNA7, IKBKB	228	586	13528	1.62002	1	0.956034	69.5892
GOTERM_BP_FAT	GO:0043085~positive regulation of catalytic activity	14	3.93258	0.0992356	PRKCZ, MSH3, MAP2K3, PFKFB2, PRKAG2, NR4A2, TLR6, EDNRB, MAP3K6, ACD, PRLR, CHRM1, DGKZ, CHRNA7	228	520	13528	1.59744	1	0.951054	82.4595
GOTERM_BP_FAT	GO:0032147~activation of protein kinase activity	5	1.40449	0.125115	PRKCZ, PRLR, CHRM1, DGKZ, TLR6	228	114	13528	2.60234	1	0.956986	89.206
GOTERM_BP_FAT	GO:0043405~regulation of MAP kinase activity	5	1.40449	0.212362	MAP3K6, MAP2K3, CHRNA7, TLR6, GPS2	228	141	13528	2.10402	1	0.98272	98.1237
GOTERM_BP_FAT	GO:0043406~positive regulation of MAP kinase activity	4	1.1236	0.244867	MAP3K6, MAP2K3, CHRNA7, TLR6	228	102	13528	2.3268	1	0.97989	99.07
GOTERM_BP_FAT	GO:0000165~MAPKKK cascade	5	1.40449	0.373176	MAP3K6, MAP2K3, MAP4K2, CHRNA7, GPS2	228	184	13528	1.61232	1	0.990348	99.9582
GOTERM_BP_FAT	GO:0000187~activation of MAPK activity	3	0.842697	0.401326	MAP3K6, MAP2K3, CHRNA7	228	82	13528	2.17073	1	0.991898	99.9805

## Sheet: Tabel S6F-ER-FDR0.2-4th
Table S6F (related to Figure 6): Functional annotation of the 4th group of genes of the heatmap (Figure 6B) by DAVID
Annotation Cluster 1	Enrichment Score: 24.110930182288453					List Total	Pop Hits	Pop Total	Fold Enrichment	Bonferroni	Benjamini	FDR
Category	Term	Count	%	PValue	Genes	348	461	19235	8.87245	2.38e-45	2.38e-45	1.17e-44
SP_PIR_KEYWORDS	cell cycle	74	21.2644	8.92e-48	KIF23, E2F1, KIFC1, PRC1, DBF4, E2F8, KNTC1, PKMYT1, PTTG1, LATS2, CCNE2, FAM83D, KIF2C, CCNE1, CDC45, FANCI, CDKN2D, MTBP, CDCA2, CABLES2, CCNA2, CDCA3, ANAPC1, CDC6, CDK1, KIF11, LIG1, RBL1, SGOL1, CCNF, LIG3, NUSAP1, CDK6, MCM2, MCM3, UBE2C, ESCO2, PPM1D, UHRF1, SPAG5, FANCD2, HAUS8, CHFR, DSCC1, CCDC99, HAUS5, NEK2, ANLN, CEP55, SPC24, NCAPH, NCAPG, HJURP, BUB1, FBXO5, SKA3, SKA2, ERCC6L, TFD…	266	776	13528	5.89838	4.21e-42	4.21e-42	5.12e-42
GOTERM_BP_FAT	GO:0007049~cell cycle	90	25.8621	3.12e-45	KIF23, E2F1, CEP72, KIFC1, KIF22, PRC1, DBF4, E2F8, KNTC1, PKMYT1, TTK, PTTG1, GTSE1, LATS2, CCNE2, FAM83D, KIF2C, CCNE1, CDC45, FANCI, CDKN2D, MTBP, CDCA2, CABLES2, CCNA2, CDCA3, ANAPC1, CDC6, CDK1, KIF11, LIG1, RBL1, SGOL1, KIF15, CCNF, POLE, LIG3, TPX2, NUSAP1, ESPL1, CDK6, MCM2, UBE2C, MCM3, ESCO2, RAD51, RAD1, PPM1D, UHRF1, SPAG5, FANCD2, HAUS8, CHFR, DSCC1, CCDC99, HAUS5, NEK2, ANLN, CEP55,…	266	414	13528	8.2305	8.93e-39	4.46e-39	1.09e-38
GOTERM_BP_FAT	GO:0022403~cell cycle phase	67	19.2529	6.62e-42	E2F1, KIF23, KIF22, KIFC1, PRC1, DBF4, KNTC1, PKMYT1, TTK, PTTG1, LATS2, GTSE1, FAM83D, KIF2C, CCNE1, CDKN2D, MTBP, CDCA2, CCNA2, CDCA3, ANAPC1, CDC6, CDK1, KIF11, SGOL1, POLE, CCNF, KIF15, LIG3, TPX2, NUSAP1, ESPL1, CDK6, UBE2C, RAD51, RAD1, PPM1D, SPAG5, FANCD2, HAUS8, CHFR, DSCC1, CCDC99, HAUS5, NEK2, ANLN, CEP55, SPC24, NCAPH, NCAPG, BUB1, FBXO5, SKA3, SKA2, ERCC6L, TRIP13, TAF2, DLGAP5, NUF2…	266	370	13528	8.52201	2.24e-36	7.47e-37	2.73e-36
GOTERM_BP_FAT	GO:0000278~mitotic cell cycle	62	17.8161	1.66e-39	E2F1, KIF23, KIF22, KIFC1, PRC1, DBF4, KNTC1, PKMYT1, TTK, PTTG1, LATS2, GTSE1, FAM83D, KIF2C, CCNE1, CDKN2D, MTBP, CDCA2, CCNA2, CDCA3, ANAPC1, CDK1, CDC6, KIF11, SGOL1, POLE, CCNF, KIF15, TPX2, NUSAP1, CDK6, ESPL1, UBE2C, PPM1D, SPAG5, HAUS8, CHFR, DSCC1, CCDC99, HAUS5, NEK2, ANLN, CEP55, SPC24, NCAPH, NCAPG, CENPA, BUB1, FBXO5, SKA3, SKA2, ERCC6L, TAF2, DLGAP5, NUF2, BIRC5, NDC80, CDC25A, CDC2…	266	565	13528	6.48091	5.6e-35	1.4e-35	6.81e-35
GOTERM_BP_FAT	GO:0022402~cell cycle process	72	20.6897	4.15e-38	E2F1, KIF23, CEP72, KIF22, KIFC1, PRC1, DBF4, KNTC1, PKMYT1, TTK, PTTG1, LATS2, GTSE1, FAM83D, KIF2C, CCNE1, CDKN2D, MTBP, CDCA2, CCNA2, CDCA3, ANAPC1, CDC6, CDK1, KIF11, SGOL1, POLE, CCNF, KIF15, LIG3, TPX2, NUSAP1, ESPL1, CDK6, UBE2C, RAD51, RAD1, PPM1D, SPAG5, FANCD2, HAUS8, CHFR, DSCC1, CCDC99, HAUS5, NEK2, ANLN, CEP55, SPC24, NCAPH, CENPA, NCAPG, BUB1, FBXO5, SKA3, SKA2, ERCC6L, TRIP13, TAF2…	266	329	13528	8.65653	9.84e-33	1.97e-33	1.2e-32
GOTERM_BP_FAT	GO:0000279~M phase	56	16.092	7.3e-36	KIF23, KIF22, KIFC1, PRC1, KNTC1, TTK, PKMYT1, PTTG1, LATS2, FAM83D, KIF2C, CDCA2, CCNA2, CDCA3, ANAPC1, CDC6, CDK1, KIF11, SGOL1, CCNF, KIF15, LIG3, TPX2, NUSAP1, ESPL1, UBE2C, RAD51, RAD1, FANCD2, SPAG5, HAUS8, CHFR, DSCC1, CCDC99, HAUS5, NEK2, ANLN, CEP55, SPC24, NCAPH, NCAPG, BUB1, SKA3, FBXO5, SKA2, ERCC6L, TRIP13, DLGAP5, NUF2, BIRC5, NDC80, CDC25A, CDC25B, CCNB2, PLK1, UTP14C	266	220	13528	11.0961	1.41e-32	2.35e-33	1.72e-32
GOTERM_BP_FAT	GO:0000280~nuclear division	48	13.7931	1.05e-35	KIF23, KIF22, KIFC1, CCDC99, HAUS5, NEK2, KNTC1, PKMYT1, ANLN, PTTG1, CEP55, LATS2, SPC24, FAM83D, KIF2C, NCAPH, NCAPG, BUB1, CDCA2, SKA3, FBXO5, SKA2, CCNA2, ERCC6L, CDCA3, ANAPC1, CDK1, CDC6, KIF11, DLGAP5, SGOL1, KIF15, CCNF, TPX2, NUF2, NUSAP1, BIRC5, NDC80, ESPL1, UBE2C, CDC25A, CDC25B, CCNB2, SPAG5, PLK1, HAUS8, CHFR, DSCC1	266	220	13528	11.0961	1.41e-32	2.35e-33	1.72e-32
GOTERM_BP_FAT	GO:0007067~mitosis	48	13.7931	1.05e-35	KIF23, KIF22, KIFC1, CCDC99, HAUS5, NEK2, KNTC1, PKMYT1, ANLN, PTTG1, CEP55, LATS2, SPC24, FAM83D, KIF2C, NCAPH, NCAPG, BUB1, CDCA2, SKA3, FBXO5, SKA2, CCNA2, ERCC6L, CDCA3, ANAPC1, CDK1, CDC6, KIF11, DLGAP5, SGOL1, KIF15, CCNF, TPX2, NUF2, NUSAP1, BIRC5, NDC80, ESPL1, UBE2C, CDC25A, CDC25B, CCNB2, SPAG5, PLK1, HAUS8, CHFR, DSCC1	348	264	19235	10.4684	6.34e-33	3.17e-33	3.12e-32
SP_PIR_KEYWORDS	cell division	50	14.3678	2.38e-35	KIF23, KIFC1, PRC1, KNTC1, PTTG1, LATS2, FAM83D, CCNE2, CCNE1, KIF2C, CDCA2, CABLES2, CCNA2, CDCA3, ANAPC1, CDK1, CDC6, KIF11, LIG1, CCNF, SGOL1, LIG3, NUSAP1, CDK6, UBE2C, MCM5, SPAG5, HAUS8, CHFR, CCDC99, HAUS5, NEK2, ANLN, CEP55, SPC24, NCAPH, NCAPG, BUB1, SKA3, FBXO5, SKA2, ERCC6L, NUF2, BIRC5, NDC80, RACGAP1, CDC25A, CDC25B, CCNB2, PLK1	266	224	13528	10.898	3.41e-32	4.87e-33	4.15e-32
GOTERM_BP_FAT	GO:0000087~M phase of mitotic cell cycle	48	13.7931	2.53e-35	KIF23, KIF22, KIFC1, CCDC99, HAUS5, NEK2, KNTC1, PKMYT1, ANLN, PTTG1, CEP55, LATS2, SPC24, FAM83D, KIF2C, NCAPH, NCAPG, BUB1, CDCA2, SKA3, FBXO5, SKA2, CCNA2, ERCC6L, CDCA3, ANAPC1, CDK1, CDC6, KIF11, DLGAP5, SGOL1, KIF15, CCNF, TPX2, NUF2, NUSAP1, BIRC5, NDC80, ESPL1, UBE2C, CDC25A, CDC25B, CCNB2, SPAG5, PLK1, HAUS8, CHFR, DSCC1	266	229	13528	10.66	1e-31	1.25e-32	1.22e-31
GOTERM_BP_FAT	GO:0048285~organelle fission	48	13.7931	7.43e-35	KIF23, KIF22, KIFC1, CCDC99, HAUS5, NEK2, KNTC1, PKMYT1, ANLN, PTTG1, CEP55, LATS2, SPC24, FAM83D, KIF2C, NCAPH, NCAPG, BUB1, CDCA2, SKA3, FBXO5, SKA2, CCNA2, ERCC6L, CDCA3, ANAPC1, CDK1, CDC6, KIF11, DLGAP5, SGOL1, KIF15, CCNF, TPX2, NUF2, NUSAP1, BIRC5, NDC80, ESPL1, UBE2C, CDC25A, CDC25B, CCNB2, SPAG5, PLK1, HAUS8, CHFR, DSCC1	266	295	13528	8.79225	9.8e-30	1.09e-30	1.19e-29
GOTERM_BP_FAT	GO:0051301~cell division	51	14.6552	7.27e-33	KIF23, KIFC1, PRC1, KNTC1, PTTG1, LATS2, FAM83D, CCNE2, CCNE1, CDCA2, CABLES2, CCNA2, CDCA3, ANAPC1, CDK1, CDC6, KIF11, LIG1, CCNF, SGOL1, LIG3, NUSAP1, CDK6, ESPL1, UBE2C, MCM5, SPAG5, HAUS8, CHFR, HAUS5, NEK2, ANLN, CEP55, SPC24, NCAPH, NCAPG, BUB1, SKA3, FBXO5, SKA2, ERCC6L, CENPO, NUF2, BIRC5, NDC80, RACGAP1, CENPJ, CDC25A, CDC25B, CCNB2, PLK1	348	183	19235	12.3836	1.81e-29	6.05e-30	8.92e-29
SP_PIR_KEYWORDS	mitosis	41	11.7816	6.79e-32	KIF23, KIFC1, CCDC99, HAUS5, NEK2, KNTC1, ANLN, PTTG1, CEP55, LATS2, SPC24, FAM83D, KIF2C, NCAPH, NCAPG, BUB1, CDCA2, SKA3, FBXO5, SKA2, CCNA2, ERCC6L, CDCA3, ANAPC1, CDK1, CDC6, KIF11, SGOL1, CCNF, NUF2, NUSAP1, BIRC5, NDC80, UBE2C, CDC25A, CDC25B, CCNB2, SPAG5, PLK1, HAUS8, CHFR	236	147	12782	11.0533	1.26e-19	1.26e-19	6.3e-19
GOTERM_CC_FAT	GO:0005819~spindle	30	8.62069	4.81e-22	KIF23, KIFC1, KIF22, CCDC99, HAUS5, PRC1, NEK2, KNTC1, TTK, LATS2, FAM83D, TUBGCP3, BUB1, FBXO5, SKA3, SKA2, CKAP2, CDC6, CDK1, KIF11, DLGAP5, KIF15, TPX2, NUSAP1, BIRC5, RACGAP1, SPAG5, PLK1, MAPK14, HAUS8	236	549	12782	4.63674	4.7e-16	2.35e-16	2.36e-15
GOTERM_CC_FAT	GO:0015630~microtubule cytoskeleton	47	13.5057	1.8e-18	KIF23, KIF22, KIFC1, CEP72, CCDC99, HAUS5, PRC1, NEK2, KNTC1, TTK, CEP55, LATS2, GTSE1, FAM83D, CCNE1, TUBGCP3, KIF2C, CDC45, BUB1, SKA3, FBXO5, SKA2, TOP2A, CKAP2, CDK1, CDC6, KIF11, IFT80, DLGAP5, KIF15, TPX2, KIF18B, NUSAP1, BIRC5, ESPL1, RACGAP1, MCM3, CENPJ, BRCA1, CDC25B, PLK4, CCNB2, SPAG5, PLK1, MAPK14, HAUS8, KIF20A	266	253	13528	5.22643	3.73e-08	2.66e-09	4.53e-08
GOTERM_BP_FAT	GO:0007017~microtubule-based process	26	7.47126	2.76e-11	KIF23, CEP72, KIFC1, KIF22, CCDC99, HAUS5, PRC1, NEK2, TTK, GTSE1, TUBGCP3, KIF2C, CENPA, FBXO5, KIF11, KIF15, NUSAP1, KIF18B, ESPL1, NDC80, UBE2C, CENPJ, BRCA1, SPAG5, HAUS8, KIF20A	236	253	12782	5.1378	6.69e-08	5.57e-09	3.35e-07
GOTERM_CC_FAT	GO:0005815~microtubule organizing center	24	6.89655	2.56e-10	CEP72, KIFC1, CCDC99, HAUS5, IFT80, NEK2, DLGAP5, KIF15, ESPL1, BIRC5, CEP55, MCM3, CENPJ, BRCA1, LATS2, CDC25B, CCNE1, TUBGCP3, PLK4, CDC45, PLK1, BUB1, HAUS8, TOP2A	236	952	12782	2.73081	8.16e-08	6.27e-09	4.09e-07
GOTERM_CC_FAT	GO:0044430~cytoskeletal part	48	13.7931	3.13e-10	KIF23, KIF22, KIFC1, CEP72, CCDC99, HAUS5, PRC1, NEK2, KNTC1, TTK, ANLN, MYO9B, CEP55, LATS2, GTSE1, FAM83D, CCNE1, TUBGCP3, KIF2C, CDC45, BUB1, SKA3, FBXO5, SKA2, TOP2A, CKAP2, CDK1, CDC6, KIF11, IFT80, DLGAP5, KIF15, TPX2, KIF18B, NUSAP1, BIRC5, ESPL1, RACGAP1, MCM3, CENPJ, BRCA1, CDC25B, PLK4, SPAG5, PLK1, MAPK14, HAUS8, KIF20A	236	2596	12782	1.8151	1.09e-06	6.06e-08	5.47e-06
GOTERM_CC_FAT	GO:0043232~intracellular non-membrane-bounded organelle	87	25	4.18e-09	KIF23, CEP72, KIFC1, KIF22, PRC1, KNTC1, TTK, GTSE1, LATS2, FAM83D, KIF2C, CCNE1, CDC45, FANCI, RPL26L1, RPP30, TOP2A, DEDD2, NUP133, CDC6, CDK1, KIF11, IFT80, GPR19, SGOL1, KIF15, TPX2, NUSAP1, RAI14, ESPL1, MCM2, MCM3, SCEL, RAD51, RFC3, SPAG5, FANCD2, HAUS8, CLOCK, SGCB, DSCC1, CCDC99, HAUS5, NEK2, ANLN, MYO9B, CEP55, MYBL1, POT1, SPC24, TUBGCP3, NCAPH, MRPL13, VRK1, CENPA, NCAPG, HJURP, CENPC…	236	2596	12782	1.8151	1.09e-06	6.06e-08	5.47e-06
GOTERM_CC_FAT	GO:0043228~non-membrane-bounded organelle	87	25	4.18e-09	KIF23, CEP72, KIFC1, KIF22, PRC1, KNTC1, TTK, GTSE1, LATS2, FAM83D, KIF2C, CCNE1, CDC45, FANCI, RPL26L1, RPP30, TOP2A, DEDD2, NUP133, CDC6, CDK1, KIF11, IFT80, GPR19, SGOL1, KIF15, TPX2, NUSAP1, RAI14, ESPL1, MCM2, MCM3, SCEL, RAD51, RFC3, SPAG5, FANCD2, HAUS8, CLOCK, SGCB, DSCC1, CCDC99, HAUS5, NEK2, ANLN, MYO9B, CEP55, MYBL1, POT1, SPC24, TUBGCP3, NCAPH, MRPL13, VRK1, CENPA, NCAPG, HJURP, CENPC…	236	224	12782	5.0776	1.42e-06	7.48e-08	7.12e-06
GOTERM_CC_FAT	GO:0005813~centrosome	21	6.03448	5.44e-09	CEP72, KIFC1, CCDC99, HAUS5, NEK2, DLGAP5, KIF15, ESPL1, BIRC5, CEP55, MCM3, CENPJ, LATS2, CDC25B, CCNE1, TUBGCP3, PLK4, CDC45, PLK1, HAUS8, TOP2A	236	274	12782	4.54636	1.72e-06	8.6e-08	8.62e-06
GOTERM_CC_FAT	GO:0005874~microtubule	23	6.6092	6.59e-09	CKAP2, KIF23, CDK1, KIFC1, KIF22, HAUS5, KIF11, PRC1, KIF15, KNTC1, NUSAP1, KIF18B, BIRC5, RACGAP1, CENPJ, GTSE1, TUBGCP3, KIF2C, SPAG5, SKA3, SKA2, HAUS8, KIF20A	348	231	19235	4.78554	1.16e-05	1.29e-06	5.71e-05
SP_PIR_KEYWORDS	microtubule	20	5.74713	4.35e-08	CKAP2, KIF23, KIFC1, KIF22, HAUS5, KIF11, PRC1, KIF15, NUSAP1, KIF18B, RACGAP1, CENPJ, GTSE1, TUBGCP3, KIF2C, SPAG5, SKA3, SKA2, HAUS8, KIF20A	348	636	19235	2.86794	4.98e-05	4.53e-06	0.000245
SP_PIR_KEYWORDS	cytoskeleton	33	9.48276	1.87e-07	KIF23, KIFC1, CEP72, CCDC99, HAUS5, PRC1, KNTC1, MYO9B, ANLN, CEP55, LATS2, FAM83D, KIF2C, TUBGCP3, SKA3, FBXO5, SKA2, CKAP2, IFT80, DLGAP5, KIF15, SGOL1, TPX2, RAI14, NUSAP1, BIRC5, RACGAP1, CENPJ, CDC25B, PLK4, SPAG5, HAUS8, SGCB	236	1381	12782	2.03937	0.0002	9.1e-06	0.0010031
GOTERM_CC_FAT	GO:0005856~cytoskeleton	52	14.9425	7.67e-07	KIF23, KIF22, KIFC1, CEP72, PRC1, KNTC1, TTK, LATS2, GTSE1, FAM83D, KIF2C, CCNE1, CDC45, TOP2A, CDK1, CDC6, KIF11, IFT80, KIF15, TPX2, RAI14, NUSAP1, ESPL1, MCM3, SCEL, SPAG5, HAUS8, SGCB, CCDC99, HAUS5, NEK2, MYO9B, ANLN, CEP55, TUBGCP3, BUB1, SKA3, FBXO5, SKA2, CKAP2, DLGAP5, KIF18B, BIRC5, RACGAP1, CENPJ, BRCA1, CDC25B, PLK4, CCNB2, PLK1, MAPK14, KIF20A
Annotation Cluster 2	Enrichment Score: 13.45450023112346					List Total	Pop Hits	Pop Total	Fold Enrichment	Bonferroni	Benjamini	FDR
Category	Term	Count	%	PValue	Genes	236	124	12782	10.9196	8.58e-16	2.86e-16	4.3e-15
GOTERM_CC_FAT	GO:0000775~chromosome, centromeric region	25	7.18391	3.29e-18	KIF22, CCDC99, KNTC1, SPC24, KIF2C, CENPA, HJURP, CENPC1, BUB1, SKA3, SKA2, ERCC6L, CENPO, NUP133, CENPM, CENPL, CENPP, SGOL1, NUF2, SUV39H1, BIRC5, NDC80, CENPI, SPAG5, DSCC1	236	129	12782	10.4963	2.25e-15	5.62e-16	1.13e-14
GOTERM_CC_FAT	GO:0000793~condensed chromosome	25	7.18391	8.61e-18	CCDC99, NEK2, KNTC1, SPC24, KIF2C, NCAPH, CENPA, NCAPG, HJURP, CENPC1, BUB1, SKA3, SKA2, ERCC6L, CENPO, NUP133, CENPM, SGOL1, NUF2, SUV39H1, NDC80, BRCA1, RAD51, SPAG5, FANCD2	348	63	19235	16.6696	8.37e-15	2.09e-15	4.11e-14
SP_PIR_KEYWORDS	kinetochore	19	5.45977	3.13e-17	CENPO, NUP133, CCDC99, CENPM, NEK2, SGOL1, KNTC1, NUF2, NDC80, SPC24, KIF2C, PLK1, CENPA, SPAG5, CENPC1, BUB1, SKA3, SKA2, ERCC6L	236	66	12782	14.7712	5.22e-13	1.04e-13	2.61e-12
GOTERM_CC_FAT	GO:0000779~condensed chromosome, centromeric region	18	5.17241	2e-15	CENPO, NUP133, CCDC99, CENPM, SGOL1, KNTC1, NUF2, NDC80, SPC24, KIF2C, HJURP, CENPA, SPAG5, CENPC1, BUB1, SKA3, SKA2, ERCC6L	236	58	12782	15.8748	1.07e-12	1.79e-13	5.37e-12
GOTERM_CC_FAT	GO:0000777~condensed chromosome kinetochore	17	4.88506	4.16e-15	CENPO, NUP133, CCDC99, CENPM, KNTC1, NUF2, NDC80, SPC24, KIF2C, HJURP, CENPA, SPAG5, CENPC1, BUB1, SKA3, SKA2, ERCC6L	236	77	12782	12.661	8.43e-12	1.2e-12	4.23e-11
GOTERM_CC_FAT	GO:0000776~kinetochore	18	5.17241	3.24e-14	CENPO, NUP133, KIF22, CCDC99, CENPM, KNTC1, NUF2, NDC80, SPC24, KIF2C, HJURP, CENPA, SPAG5, CENPC1, BUB1, SKA3, SKA2, ERCC6L	236	460	12782	4.35643	3.56e-11	4.45e-12	1.78e-10
GOTERM_CC_FAT	GO:0005694~chromosome	37	10.6322	1.36e-13	KIF22, CCDC99, NEK2, KNTC1, POT1, SPC24, KIF2C, NCAPH, FANCI, CENPA, NCAPG, HJURP, CENPC1, BUB1, SKA3, SKA2, TOP2A, ERCC6L, CENPO, NUP133, CENPM, CENPL, CENPP, SGOL1, SUV39H1, NUF2, BIRC5, NDC80, MCM2, MCM3, CENPI, BRCA1, RAD51, RFC3, SPAG5, FANCD2, DSCC1	348	38	19235	18.9092	4.67e-10	6.67e-11	2.29e-09
SP_PIR_KEYWORDS	centromere	13	3.73563	1.75e-12	CENPO, CENPL, NEK2, CENPP, SGOL1, SUV39H1, BIRC5, CENPI, KIF2C, HJURP, CENPA, CENPC1, ERCC6L	236	386	12782	4.34972	5.6e-09	5.6e-10	2.81e-08
GOTERM_CC_FAT	GO:0044427~chromosomal part	31	8.90805	2.15e-11	KIF22, CCDC99, KNTC1, POT1, SPC24, KIF2C, NCAPH, CENPA, NCAPG, HJURP, CENPC1, BUB1, SKA3, SKA2, ERCC6L, CENPO, NUP133, CENPM, CENPL, CENPP, SGOL1, NUF2, SUV39H1, BIRC5, NDC80, MCM2, MCM3, CENPI, RFC3, SPAG5, DSCC1	348	145	19235	5.3367	0.000622	3.89e-05	0.00305639
SP_PIR_KEYWORDS	chromosomal protein	14	4.02299	2.33e-06	CENPO, CENPM, CENPL, CENPP, SUV39H1, BIRC5, POT1, CENPI, KIF2C, FANCD2, HJURP, CENPA, FANCI, CENPC1
Annotation Cluster 3	Enrichment Score: 12.597100299716308					List Total	Pop Hits	Pop Total	Fold Enrichment	Bonferroni	Benjamini	FDR
Category	Term	Count	%	PValue	Genes	266	190	13528	7.22707	6.58e-12	5.99e-13	8.02e-12
GOTERM_BP_FAT	GO:0006260~DNA replication	27	7.75862	4.88e-15	PDGFB, DBF4, POT1, TK1, CCNE2, CDC45, CDKN2D, TOP2A, CDC6, DTL, LIG1, GINS4, POLE, LIG3, MCM2, MCM3, CDC25A, BRCA1, MCM5, RAD51, RAD1, RFC3, POLD1, CHTF18, CHAF1A, CHAF1B, DSCC1	266	506	13528	3.91982	1.12e-09	8.64e-11	1.37e-09
GOTERM_BP_FAT	GO:0006259~DNA metabolic process	39	11.2069	8.33e-13	KIF22, PDGFB, DBF4, PTTG1, POT1, TK1, CCNE2, CDC45, FANCI, CDKN2D, NSMCE2, TOP2A, TRIP13, CDC6, RAD51AP1, DTL, LIG1, GINS4, POLE, LIG3, MCM2, MCM3, BRCA1, MCM5, CDC25A, UIMC1, ESCO2, RAD51, RAD1, UHRF1, RFC3, DCLRE1B, FANCD2, POLD1, CHTF18, DNMT1, CHAF1A, CHAF1B, DSCC1	348	88	19235	10.6777	1.06e-09	1.33e-10	5.22e-09
SP_PIR_KEYWORDS	dna replication	17	4.88506	3.98e-12	CDC6, DTL, DBF4, LIG1, POLE, GINS4, LIG3, MCM2, MCM3, MCM5, RFC3, CDC45, POLD1, CHTF18, CHAF1A, CHAF1B, DSCC1
Annotation Cluster 4	Enrichment Score: 9.479760451089735					List Total	Pop Hits	Pop Total	Fold Enrichment	Bonferroni	Benjamini	FDR
Category	Term	Count	%	PValue	Genes	236	882	12782	3.07035	4.51e-10	5.01e-11	2.26e-09
GOTERM_CC_FAT	GO:0005654~nucleoplasm	50	14.3678	1.73e-12	E2F1, KIF23, DBF4, E2F8, EZH2, HR, PKMYT1, CCNE2, CCNE1, CDC45, FANCI, RNF34, TOP2A, CCNA2, ANAPC1, CDK1, CDC6, STRN3, LIG1, POLE, RBL1, LIG3, MCM2, MCM3, UBE2C, MCM5, RAD51, RFC3, FANCD2, CHFR, CLOCK, DSCC1, NFYA, POT1, FBXO5, WDHD1, TFDP1, KAT2A, TAF2, SMAD9, BRCA1, CDC25A, CDC25B, PLK1, MAPK14, POLD1, PBX3, CHAF1B, DUSP7, KIF20A	236	1450	12782	2.39056	8.45e-09	7.68e-10	4.24e-08
GOTERM_CC_FAT	GO:0031981~nuclear lumen	64	18.3908	3.24e-11	E2F1, KIF23, DBF4, EZH2, E2F8, HR, PKMYT1, CCNE2, CCNE1, CDC45, FANCI, RPP30, RNF34, TOP2A, CCNA2, DEDD2, ANAPC1, CDK1, CDC6, GPR19, STRN3, LIG1, RBL1, POLE, LIG3, TPX2, NUSAP1, MCM2, MCM3, UBE2C, MCM5, RAD51, RFC3, PIAS4, FANCD2, CHFR, CLOCK, DSCC1, NEK2, NFYA, MYBL1, POT1, VRK1, HJURP, FBXO5, WDHD1, TFDP1, KAT2A, TAF2, SMAD9, NOC4L, BIRC5, CDC25A, BRCA1, CDC25B, PLK4, PLK1, MAPK14, POLD1, PBX3,…	236	1779	12782	2.07024	8.16e-07	5.1e-08	4.09e-06
GOTERM_CC_FAT	GO:0070013~intracellular organelle lumen	68	19.5402	3.13e-09	KIF23, E2F1, GRPEL2, DBF4, EZH2, E2F8, HR, PKMYT1, CCNE2, CCNE1, CDC45, PTGIS, FANCI, RPP30, RNF34, TOP2A, CCNA2, DEDD2, ANAPC1, CDC6, CDK1, GPR19, LIG1, STRN3, RBL1, POLE, LIG3, TPX2, NUSAP1, MCM2, MCM3, UBE2C, MCM5, RAD51, RFC3, PIAS4, FANCD2, CHFR, CLOCK, DSCC1, NEK2, NFS1, NFYA, MYBL1, POT1, MRPL13, VRK1, HJURP, FBXO5, WDHD1, TFDP1, KAT2A, TAF2, SMAD9, NOC4L, BIRC5, CDC25A, BRCA1, CDC25B, PLK…	236	1820	12782	2.05336	8.28e-07	4.87e-08	4.15e-06
GOTERM_CC_FAT	GO:0043233~organelle lumen	69	19.8276	3.17e-09	KIF23, E2F1, GRPEL2, PDGFB, DBF4, EZH2, E2F8, HR, PKMYT1, CCNE2, CCNE1, CDC45, PTGIS, FANCI, RPP30, RNF34, TOP2A, CCNA2, DEDD2, ANAPC1, CDC6, CDK1, GPR19, LIG1, STRN3, RBL1, POLE, LIG3, TPX2, NUSAP1, MCM2, MCM3, UBE2C, MCM5, RAD51, RFC3, PIAS4, FANCD2, CHFR, CLOCK, DSCC1, NEK2, NFS1, NFYA, MYBL1, POT1, MRPL13, VRK1, HJURP, FBXO5, WDHD1, TFDP1, KAT2A, TAF2, SMAD9, NOC4L, BIRC5, CDC25A, BRCA1, CDC2…	236	1856	12782	2.01353	1.88e-06	8.94e-08	9.4e-06
GOTERM_CC_FAT	GO:0031974~membrane-enclosed lumen	69	19.8276	7.19e-09	KIF23, E2F1, GRPEL2, PDGFB, DBF4, EZH2, E2F8, HR, PKMYT1, CCNE2, CCNE1, CDC45, PTGIS, FANCI, RPP30, RNF34, TOP2A, CCNA2, DEDD2, ANAPC1, CDC6, CDK1, GPR19, LIG1, STRN3, RBL1, POLE, LIG3, TPX2, NUSAP1, MCM2, MCM3, UBE2C, MCM5, RAD51, RFC3, PIAS4, FANCD2, CHFR, CLOCK, DSCC1, NEK2, NFS1, NFYA, MYBL1, POT1, MRPL13, VRK1, HJURP, FBXO5, WDHD1, TFDP1, KAT2A, TAF2, SMAD9, NOC4L, BIRC5, CDC25A, BRCA1, CDC2…
Annotation Cluster 5	Enrichment Score: 8.738484581208196					List Total	Pop Hits	Pop Total	Fold Enrichment	Bonferroni	Benjamini	FDR
Category	Term	Count	%	PValue	Genes	266	253	13528	5.22643	3.73e-08	2.66e-09	4.53e-08
GOTERM_BP_FAT	GO:0007017~microtubule-based process	26	7.47126	2.76e-11	KIF23, CEP72, KIFC1, KIF22, CCDC99, HAUS5, PRC1, NEK2, TTK, GTSE1, TUBGCP3, KIF2C, CENPA, FBXO5, KIF11, KIF15, NUSAP1, KIF18B, ESPL1, NDC80, UBE2C, CENPJ, BRCA1, SPAG5, HAUS8, KIF20A	266	147	13528	6.91934	9.79e-08	6.53e-09	1.19e-07
GOTERM_BP_FAT	GO:0000226~microtubule cytoskeleton organization	20	5.74713	7.27e-11	KIF23, CEP72, CCDC99, HAUS5, KIF11, PRC1, NEK2, TTK, NUSAP1, ESPL1, NDC80, UBE2C, CENPJ, BRCA1, KIF2C, TUBGCP3, CENPA, SPAG5, FBXO5, HAUS8	266	45	13528	12.4317	1.65e-05	8.26e-07	2.01e-05
GOTERM_BP_FAT	GO:0007051~spindle organization	11	3.16092	1.23e-08	KIF23, HAUS5, KIF11, PRC1, SPAG5, TTK, FBXO5, NDC80, ESPL1, HAUS8, UBE2C	266	436	13528	3.14941	0.000609	2.34e-05	0.000741
GOTERM_BP_FAT	GO:0007010~cytoskeleton organization	27	7.75862	4.52e-07	KIF23, CEP72, CCDC99, HAUS5, PRC1, PDGFB, NEK2, DIAPH3, TTK, MYO9B, ANLN, TUBGCP3, KIF2C, CENPA, FBXO5, KIF11, NUSAP1, ESPL1, NDC80, UBE2C, RACGAP1, CENPJ, LPIN1, BRCA1, SPAG5, HAUS8, SGCB
Annotation Cluster 6	Enrichment Score: 7.825978895209973					List Total	Pop Hits	Pop Total	Fold Enrichment	Bonferroni	Benjamini	FDR
Category	Term	Count	%	PValue	Genes	266	506	13528	3.91982	1.12e-09	8.64e-11	1.37e-09
GOTERM_BP_FAT	GO:0006259~DNA metabolic process	39	11.2069	8.33e-13	KIF22, PDGFB, DBF4, PTTG1, POT1, TK1, CCNE2, CDC45, FANCI, CDKN2D, NSMCE2, TOP2A, TRIP13, CDC6, RAD51AP1, DTL, LIG1, GINS4, POLE, LIG3, MCM2, MCM3, BRCA1, MCM5, CDC25A, UIMC1, ESCO2, RAD51, RAD1, UHRF1, RFC3, DCLRE1B, FANCD2, POLD1, CHTF18, DNMT1, CHAF1A, CHAF1B, DSCC1	266	373	13528	3.95404	1.47e-06	9.17e-08	1.78e-06
GOTERM_BP_FAT	GO:0006974~response to DNA damage stimulus	29	8.33333	1.09e-09	KIF22, PTTG1, GTSE1, FANCI, CDKN2D, NSMCE2, CCNA2, TOP2A, TRIP13, CDK1, RAD51AP1, DTL, LIG1, POLE, LIG3, ATAD5, ESCO2, UIMC1, BRCA1, RAD51, RAD1, UHRF1, RFC3, DCLRE1B, FANCD2, MAPK14, POLD1, CHAF1A, CHAF1B	266	284	13528	4.11871	5.6e-05	2.24e-06	6.81e-05
GOTERM_BP_FAT	GO:0006281~DNA repair	23	6.6092	4.15e-08	KIF22, RAD51AP1, LIG1, POLE, LIG3, PTTG1, ESCO2, BRCA1, UIMC1, RAD51, RAD1, UHRF1, RFC3, DCLRE1B, FANCD2, FANCI, POLD1, CDKN2D, NSMCE2, CHAF1A, TOP2A, CHAF1B, TRIP13	348	205	19235	4.85324	5.36e-05	4.47e-06	0.000264
SP_PIR_KEYWORDS	DNA damage	18	5.17241	2.01e-07	RAD51AP1, DTL, LIG1, POLE, LIG3, ATAD5, PTTG1, BRCA1, UIMC1, RAD51, RAD1, UHRF1, DCLRE1B, FANCD2, FANCI, NSMCE2, CHAF1A, CHAF1B	266	566	13528	2.78546	0.000946	3.5e-05	0.00115132
GOTERM_BP_FAT	GO:0033554~cellular response to stress	31	8.90805	7.02e-07	KIF22, PTTG1, GTSE1, FANCI, MAP3K9, CDKN2D, NSMCE2, CCNA2, TOP2A, TRIP13, CDK1, RAD51AP1, DTL, LIG1, POLE, LIG3, ATAD5, EIF2B1, ESCO2, UIMC1, BRCA1, RAD51, RAD1, UHRF1, RFC3, DCLRE1B, FANCD2, MAPK14, POLD1, CHAF1A, CHAF1B	348	191	19235	4.6302	0.000557	3.71e-05	0.00273681
SP_PIR_KEYWORDS	dna repair	16	4.5977	2.09e-06	RAD51AP1, LIG1, POLE, LIG3, PTTG1, UIMC1, BRCA1, RAD51, RAD1, UHRF1, DCLRE1B, FANCD2, FANCI, NSMCE2, CHAF1A, CHAF1B
Annotation Cluster 7	Enrichment Score: 6.285023875312253					List Total	Pop Hits	Pop Total	Fold Enrichment	Bonferroni	Benjamini	FDR
Category	Term	Count	%	PValue	Genes	266	331	13528	4.9167	5.63e-10	4.69e-11	6.84e-10
GOTERM_BP_FAT	GO:0051726~regulation of cell cycle	32	9.1954	4.17e-13	E2F1, NEK2, KNTC1, PKMYT1, TTK, ANLN, GTSE1, LATS2, LIF, CCNE2, CDC45, CDKN2D, MTBP, BUB1, CABLES2, FBXO5, CCNA2, CDC6, CDK1, DLGAP5, NUSAP1, CDK6, ESPL1, BIRC5, UBE2C, BRCA1, UIMC1, CDC25A, RAD1, PLK4, MAPK14, CHFR	266	91	13528	8.38305	3.26e-06	1.92e-07	3.97e-06
GOTERM_BP_FAT	GO:0000075~cell cycle checkpoint	15	4.31034	2.42e-09	CDK1, CDC6, KNTC1, TTK, BIRC5, GTSE1, UIMC1, BRCA1, CCNE2, RAD1, CDC45, MAPK14, BUB1, CHFR, CCNA2	266	114	13528	7.13784	8.03e-06	4.46e-07	9.77e-06
GOTERM_BP_FAT	GO:0010564~regulation of cell cycle process	16	4.5977	5.96e-09	NEK2, DLGAP5, KNTC1, NUSAP1, PKMYT1, TTK, ANLN, BIRC5, ESPL1, UBE2C, BRCA1, GTSE1, LIF, PLK4, BUB1, FBXO5	266	152	13528	6.02256	9.58e-06	5.04e-07	1.17e-05
GOTERM_BP_FAT	GO:0007346~regulation of mitotic cell cycle	18	5.17241	7.11e-09	CDC6, CDK1, NEK2, DLGAP5, KNTC1, NUSAP1, PKMYT1, TTK, ESPL1, ANLN, BIRC5, UBE2C, GTSE1, MTBP, BUB1, FBXO5, CHFR, CCNA2	266	43	13528	8.27907	0.212429	0.00626456	0.29012
GOTERM_BP_FAT	GO:0007093~mitotic cell cycle checkpoint	7	2.01149	0.000177	CDK1, KNTC1, BUB1, TTK, CHFR, CCNA2, GTSE1	266	56	13528	6.35714	0.642574	0.0236423	1.24393
GOTERM_BP_FAT	GO:0007088~regulation of mitosis	7	2.01149	0.000763	NEK2, DLGAP5, BUB1, PKMYT1, NUSAP1, TTK, ESPL1	266	56	13528	6.35714	0.642574	0.0236423	1.24393
GOTERM_BP_FAT	GO:0051783~regulation of nuclear division	7	2.01149	0.000763	NEK2, DLGAP5, BUB1, PKMYT1, NUSAP1, TTK, ESPL1	266	217	13528	3.04674	0.799209	0.0358308	1.93439
GOTERM_BP_FAT	GO:0033043~regulation of organelle organization	13	3.73563	0.00119031	NEK2, DLGAP5, NUSAP1, PKMYT1, TTK, ESPL1, BRCA1, POT1, PLK4, BUB1, SKA3, DNMT1, SKA2
Annotation Cluster 8	Enrichment Score: 5.987039264337144					List Total	Pop Hits	Pop Total	Fold Enrichment	Bonferroni	Benjamini	FDR
Category	Term	Count	%	PValue	Genes	266	103	13528	7.40638	1.7e-05	8.11e-07	2.07e-05
GOTERM_BP_FAT	GO:0051329~interphase of mitotic cell cycle	15	4.31034	1.26e-08	E2F1, TAF2, CDC6, DBF4, POLE, CDK6, BIRC5, LATS2, GTSE1, CDC25A, CCNE1, PPM1D, CDKN2D, POLD1, MTBP	266	106	13528	7.19677	2.48e-05	1.13e-06	3.02e-05
GOTERM_BP_FAT	GO:0051325~interphase	15	4.31034	1.84e-08	E2F1, TAF2, CDC6, DBF4, POLE, CDK6, BIRC5, LATS2, GTSE1, CDC25A, CCNE1, PPM1D, CDKN2D, POLD1, MTBP	266	56	13528	5.44898	0.998254	0.103705	7.43509
GOTERM_BP_FAT	GO:0000082~G1/S transition of mitotic cell cycle	6	1.72414	0.00469973	CCNE1, DBF4, CDKN2D, POLE, LATS2, CDC25A
Annotation Cluster 9	Enrichment Score: 5.801571923856642					List Total	Pop Hits	Pop Total	Fold Enrichment	Bonferroni	Benjamini	FDR
Category	Term	Count	%	PValue	Genes	348	962	19113	2.56914	1.48e-05	1.48e-05	2.55e-05
UP_SEQ_FEATURE	nucleotide phosphate-binding region:ATP	45	12.931	1.63e-08	KIF23, KIFC1, KIF22, NEK2, DCK, TTK, UBA6, PKMYT1, ATP10D, MYO9B, LATS2, TK1, KIF2C, VRK1, DDX49, DHX37, MAP3K9, BUB1, TOP2A, ERCC6L, TRIP13, TEC, CDK1, CDC6, KIF11, KIF15, KIF18B, TRIO, ATAD2, CDK6, ATAD5, MCM2, MCM3, C9ORF167, MCM5, STK3, SRPK1, RAD51, PLK4, PLK1, MAPK14, CHTF18, RIPK4, MELK, KIF20A	231	1477	12983	2.13094	2.28e-05	2.28e-05	7.34e-05
GOTERM_MF_FAT	GO:0005524~ATP binding	56	16.092	5.19e-08	KIF23, KIFC1, KIF22, TTK, PKMYT1, ATP10D, LATS2, KIF2C, HSPH1, ATP2B4, DHX37, MAP3K9, PIK3CA, TOP2A, CDK1, CDC6, KIF11, LIG1, KIF15, LIG3, TPX2, CDK6, MCM2, MCM3, C9ORF167, UBE2C, STK3, SRPK1, MCM5, RAD51, RFC3, RIPK4, FASTKD5, MELK, NEK2, DCK, UBA6, MYO9B, TK1, VRK1, DDX49, BUB1, TEC, TRIP13, ERCC6L, SACS, KIF18B, ATAD2, TRIO, ATAD5, PLK4, PLK1, MAPK14, CHTF18, AACS, KIF20A	231	1497	12983	2.10247	3.61e-05	1.8e-05	0.000116
GOTERM_MF_FAT	GO:0032559~adenyl ribonucleotide binding	56	16.092	8.19e-08	KIF23, KIFC1, KIF22, TTK, PKMYT1, ATP10D, LATS2, KIF2C, HSPH1, ATP2B4, DHX37, MAP3K9, PIK3CA, TOP2A, CDK1, CDC6, KIF11, LIG1, KIF15, LIG3, TPX2, CDK6, MCM2, MCM3, C9ORF167, UBE2C, STK3, SRPK1, MCM5, RAD51, RFC3, RIPK4, FASTKD5, MELK, NEK2, DCK, UBA6, MYO9B, TK1, VRK1, DDX49, BUB1, TEC, TRIP13, ERCC6L, SACS, KIF18B, ATAD2, TRIO, ATAD5, PLK4, PLK1, MAPK14, CHTF18, AACS, KIF20A	348	1326	19235	2.20925	2.52e-05	2.52e-06	0.000124
SP_PIR_KEYWORDS	atp-binding	53	15.2299	9.45e-08	KIF23, KIFC1, KIF22, TTK, PKMYT1, ATP10D, LATS2, KIF2C, HSPH1, ATP2B4, DHX37, MAP3K9, PIK3CA, TOP2A, CDK1, CDC6, KIF11, LIG1, KIF15, LIG3, CDK6, MCM2, MCM3, C9ORF167, UBE2C, STK3, MCM5, SRPK1, RAD51, RFC3, RIPK4, MELK, NEK2, DCK, UBA6, MYO9B, TK1, VRK1, DDX49, BUB1, TEC, TRIP13, ERCC6L, KIF18B, ATAD2, TRIO, ATAD5, PLK4, PLK1, MAPK14, CHTF18, AACS, KIF20A	231	1601	12983	2.0361	5.76e-05	1.92e-05	0.000185
GOTERM_MF_FAT	GO:0001883~purine nucleoside binding	58	16.6667	1.31e-07	KIF23, KIFC1, KIF22, GRPEL2, TTK, PKMYT1, ATP10D, LATS2, KIF2C, HSPH1, ATP2B4, DHX37, MAP3K9, PIK3CA, TOP2A, CDK1, CDC6, KIF11, LIG1, KIF15, LIG3, TPX2, CDK6, MCM2, MCM3, C9ORF167, UBE2C, STK3, SRPK1, MCM5, RAD51, RFC3, RIPK4, FASTKD5, MELK, NEK2, DCK, UBA6, MYO9B, TK1, VRK1, DDX49, BUB1, ERCC6L, TEC, TRIP13, SACS, KIF18B, ATAD2, TRIO, ATAD5, EIF2B1, PLK4, PLK1, MAPK14, CHTF18, AACS, KIF20A	231	1612	12983	2.02221	7.28e-05	1.82e-05	0.000234
GOTERM_MF_FAT	GO:0001882~nucleoside binding	58	16.6667	1.66e-07	KIF23, KIFC1, KIF22, GRPEL2, TTK, PKMYT1, ATP10D, LATS2, KIF2C, HSPH1, ATP2B4, DHX37, MAP3K9, PIK3CA, TOP2A, CDK1, CDC6, KIF11, LIG1, KIF15, LIG3, TPX2, CDK6, MCM2, MCM3, C9ORF167, UBE2C, STK3, SRPK1, MCM5, RAD51, RFC3, RIPK4, FASTKD5, MELK, NEK2, DCK, UBA6, MYO9B, TK1, VRK1, DDX49, BUB1, ERCC6L, TEC, TRIP13, SACS, KIF18B, ATAD2, TRIO, ATAD5, EIF2B1, PLK4, PLK1, MAPK14, CHTF18, AACS, KIF20A	231	1577	12983	2.03145	8.41e-05	1.68e-05	0.00027
GOTERM_MF_FAT	GO:0030554~adenyl nucleotide binding	57	16.3793	1.91e-07	KIF23, KIFC1, KIF22, GRPEL2, TTK, PKMYT1, ATP10D, LATS2, KIF2C, HSPH1, ATP2B4, DHX37, MAP3K9, PIK3CA, TOP2A, CDK1, CDC6, KIF11, LIG1, KIF15, LIG3, TPX2, CDK6, MCM2, MCM3, C9ORF167, UBE2C, STK3, SRPK1, MCM5, RAD51, RFC3, RIPK4, FASTKD5, MELK, NEK2, DCK, UBA6, MYO9B, TK1, VRK1, DDX49, BUB1, TEC, TRIP13, ERCC6L, SACS, KIF18B, ATAD2, TRIO, ATAD5, PLK4, PLK1, MAPK14, CHTF18, AACS, KIF20A	231	1918	12983	1.8168	0.000943	0.000157	0.00303169
GOTERM_MF_FAT	GO:0017076~purine nucleotide binding	62	17.8161	2.14e-06	KIF23, KIF22, KIFC1, GRPEL2, TTK, PKMYT1, ATP10D, LATS2, HSPH1, KIF2C, ARL10, ATP2B4, DHX37, MAP3K9, PIK3CA, TOP2A, CDK1, CDC6, KIF11, LIG1, KIF15, LIG3, TPX2, CDK6, MCM2, C9ORF167, MCM3, UBE2C, STK3, SRPK1, MCM5, RAD51, FAM114A2, RFC3, RIPK4, FASTKD5, MELK, NEK2, DCK, UBA6, MYO9B, TK1, VRK1, DDX49, BUB1, ERCC6L, TEC, TRIP13, RANBP17, SACS, KIF18B, ATAD2, TRIO, ATAD5, EIF2B1, RAB33B, PLK4, PLK1, …	231	1836	12983	1.83671	0.00105543	0.000151	0.00339385
GOTERM_MF_FAT	GO:0032555~purine ribonucleotide binding	60	17.2414	2.4e-06	KIF23, KIF22, KIFC1, TTK, PKMYT1, ATP10D, LATS2, KIF2C, HSPH1, ARL10, ATP2B4, DHX37, MAP3K9, PIK3CA, TOP2A, CDK1, CDC6, KIF11, LIG1, KIF15, LIG3, TPX2, CDK6, MCM2, C9ORF167, MCM3, UBE2C, STK3, SRPK1, MCM5, RAD51, RFC3, RIPK4, FASTKD5, MELK, NEK2, DCK, UBA6, MYO9B, TK1, VRK1, DDX49, BUB1, ERCC6L, TEC, TRIP13, RANBP17, SACS, KIF18B, ATAD2, TRIO, ATAD5, EIF2B1, RAB33B, PLK4, PLK1, MAPK14, CHTF18, AA…	231	1836	12983	1.83671	0.00105543	0.000151	0.00339385
GOTERM_MF_FAT	GO:0032553~ribonucleotide binding	60	17.2414	2.4e-06	KIF23, KIF22, KIFC1, TTK, PKMYT1, ATP10D, LATS2, KIF2C, HSPH1, ARL10, ATP2B4, DHX37, MAP3K9, PIK3CA, TOP2A, CDK1, CDC6, KIF11, LIG1, KIF15, LIG3, TPX2, CDK6, MCM2, C9ORF167, MCM3, UBE2C, STK3, SRPK1, MCM5, RAD51, RFC3, RIPK4, FASTKD5, MELK, NEK2, DCK, UBA6, MYO9B, TK1, VRK1, DDX49, BUB1, ERCC6L, TEC, TRIP13, RANBP17, SACS, KIF18B, ATAD2, TRIO, ATAD5, EIF2B1, RAB33B, PLK4, PLK1, MAPK14, CHTF18, AA…	231	2245	12983	1.67734	0.00473169	0.000593	0.0152424
GOTERM_MF_FAT	GO:0000166~nucleotide binding	67	19.2529	1.08e-05	KIF23, KIF22, KIFC1, GRPEL2, PKMYT1, TTK, ATP10D, LATS2, HSPH1, KIF2C, ARL10, ATP2B4, DHX37, MAP3K9, PIK3CA, TOP2A, CDK1, CDC6, KIF11, LIG1, POLE, KIF15, LIG3, TPX2, CDK6, MCM2, C9ORF167, MCM3, UBE2C, STK3, SRPK1, MCM5, RAD51, FAM114A2, RFC3, RIPK4, CHFR, FASTKD5, MELK, NEK2, TRA2B, DCK, UBA6, MYO9B, TK1, VRK1, DDX49, BUB1, ERCC6L, TEC, TRIP13, RANBP17, SACS, KIF18B, ATAD2, TRIO, ATAD5, EIF2B1, R…	348	1686	19235	1.80309	0.00639582	0.000377	0.0315369
SP_PIR_KEYWORDS	nucleotide-binding	55	15.8046	2.4e-05	KIF23, KIF22, KIFC1, TTK, PKMYT1, ATP10D, LATS2, KIF2C, HSPH1, ARL10, ATP2B4, DHX37, MAP3K9, PIK3CA, TOP2A, CDK1, CDC6, KIF11, LIG1, KIF15, LIG3, CDK6, MCM2, MCM3, C9ORF167, UBE2C, STK3, SRPK1, MCM5, RAD51, RFC3, RIPK4, MELK, NEK2, DCK, UBA6, MYO9B, TK1, VRK1, DDX49, BUB1, TEC, TRIP13, ERCC6L, KIF18B, ATAD2, TRIO, ATAD5, RAB33B, PLK4, PLK1, MAPK14, CHTF18, AACS, KIF20A	348	542	19113	2.22932	0.583929	0.196859	1.49578
UP_SEQ_FEATURE	binding site:ATP	22	6.32184	0.000965	CDK1, NEK2, LIG1, LIG3, PKMYT1, TRIO, TTK, CDK6, STK3, LATS2, SRPK1, KIF2C, PLK4, VRK1, PLK1, MAPK14, MAP3K9, BUB1, RIPK4, TOP2A, MELK, TEC	348	688	19235	1.84779	0.852781	0.0639284	8.98808
SP_PIR_KEYWORDS	kinase	23	6.6092	0.00714973	CDK1, NEK2, DCK, PKMYT1, TRIO, TTK, CDK6, ZMYND8, STK3, LATS2, SRPK1, TK1, SPAG9, PLK4, VRK1, PLK1, MAPK14, MAP3K9, BUB1, PIK3CA, RIPK4, MELK, TEC
Annotation Cluster 10	Enrichment Score: 4.129313948631804					List Total	Pop Hits	Pop Total	Fold Enrichment	Bonferroni	Benjamini	FDR
Category	Term	Count	%	PValue	Genes	266	91	13528	8.38305	3.26e-06	1.92e-07	3.97e-06
GOTERM_BP_FAT	GO:0000075~cell cycle checkpoint	15	4.31034	2.42e-09	CDK1, CDC6, KNTC1, TTK, BIRC5, GTSE1, UIMC1, BRCA1, CCNE2, RAD1, CDC45, MAPK14, BUB1, CHFR, CCNA2	266	52	13528	8.8022	0.00933965	0.000313	0.0114159
GOTERM_BP_FAT	GO:0031570~DNA integrity checkpoint	9	2.58621	6.96e-06	RAD1, CDK1, CDC6, CDC45, MAPK14, CCNA2, GTSE1, BRCA1, UIMC1	266	48	13528	7.41667	0.357877	0.0110133	0.5375
GOTERM_BP_FAT	GO:0000077~DNA damage checkpoint	7	2.01149	0.000329	RAD1, CDK1, MAPK14, CCNA2, GTSE1, BRCA1, UIMC1	266	13	13528	15.6484	0.916215	0.0503449	2.97167
GOTERM_BP_FAT	GO:0031572~G2/M transition DNA damage checkpoint	4	1.14943	0.00183771	CDK1, CCNA2, BRCA1, UIMC1	266	16	13528	12.7143	0.99046	0.084037	5.50306
GOTERM_BP_FAT	GO:0031576~G2/M transition checkpoint	4	1.14943	0.00344532	CDK1, CCNA2, BRCA1, UIMC1	266	80	13528	4.45	0.998441	0.103771	7.56321
GOTERM_BP_FAT	GO:0042770~DNA damage response, signal transduction	7	2.01149	0.00478379	RAD1, CDK1, MAPK14, CCNA2, GTSE1, BRCA1, UIMC1
Annotation Cluster 11	Enrichment Score: 3.803613743696536					List Total	Pop Hits	Pop Total	Fold Enrichment	Bonferroni	Benjamini	FDR
Category	Term	Count	%	PValue	Genes	266	81	13528	13.1852	6.96e-14	6.96e-15	8.46e-14
GOTERM_BP_FAT	GO:0007059~chromosome segregation	21	6.03448	5.16e-17	CENPO, KIFC1, CCDC99, NEK2, DLGAP5, SGOL1, NUF2, NUSAP1, ESPL1, NDC80, BIRC5, PTTG1, BRCA1, SRPK1, NCAPH, NCAPG, HJURP, SKA3, SKA2, TOP2A, DSCC1	266	36	13528	14.127	2.96e-05	1.29e-06	3.61e-05
GOTERM_BP_FAT	GO:0000070~mitotic sister chromatid segregation	10	2.87356	2.2e-08	KIFC1, NCAPH, CCDC99, NEK2, NCAPG, DLGAP5, NUSAP1, NDC80, ESPL1, DSCC1	266	37	13528	13.7452	3.85e-05	1.6e-06	4.68e-05
GOTERM_BP_FAT	GO:0000819~sister chromatid segregation	10	2.87356	2.86e-08	KIFC1, NCAPH, CCDC99, NEK2, NCAPG, DLGAP5, NUSAP1, NDC80, ESPL1, DSCC1	266	8	13528	31.7857	0.0126876	0.000412	0.0155341
GOTERM_BP_FAT	GO:0040001~establishment of mitotic spindle localization	5	1.43678	9.47e-06	CCDC99, CENPA, NUSAP1, NDC80, ESPL1	266	485	13528	2.72636	0.0136236	0.000429	0.0166879
GOTERM_BP_FAT	GO:0051276~chromosome organization	26	7.47126	1.02e-05	KIFC1, CCDC99, NEK2, EZH2, PTTG1, POT1, NCAPH, CENPA, NCAPG, HJURP, TOP2A, KAT2A, DLGAP5, RBL1, SUV39H1, NUSAP1, ESPL1, NDC80, MCM2, UIMC1, FANCD2, DNMT1, CHAF1A, CARM1, CHAF1B, DSCC1	266	10	13528	25.4286	0.036455	0.0011247	0.0451718
GOTERM_BP_FAT	GO:0051293~establishment of spindle localization	5	1.43678	2.75e-05	CCDC99, CENPA, NUSAP1, NDC80, ESPL1	266	10	13528	25.4286	0.036455	0.0011247	0.0451718
GOTERM_BP_FAT	GO:0051653~spindle localization	5	1.43678	2.75e-05	CCDC99, CENPA, NUSAP1, NDC80, ESPL1	266	69	13528	5.15942	0.953915	0.0585543	3.67477
GOTERM_BP_FAT	GO:0051656~establishment of organelle localization	7	2.01149	0.00228024	CCDC99, CENPA, DLGAP5, NUSAP1, BIRC5, NDC80, ESPL1	266	6	13528	25.4286	0.999363	0.113634	8.56336
GOTERM_BP_FAT	GO:0051294~establishment of spindle orientation	3	0.862069	0.00544371	CCDC99, CENPA, NDC80	266	6	13528	25.4286	0.999363	0.113634	8.56336
GOTERM_BP_FAT	GO:0000132~establishment of mitotic spindle orientation	3	0.862069	0.00544371	CCDC99, CENPA, NDC80	266	92	13528	3.86957	0.999997	0.167767	14.2872
GOTERM_BP_FAT	GO:0051640~organelle localization	7	2.01149	0.0093561	CCDC99, CENPA, DLGAP5, NUSAP1, BIRC5, NDC80, ESPL1	266	15	13528	10.1714	1	0.400356	43.2335
GOTERM_BP_FAT	GO:0050000~chromosome localization	3	0.862069	0.0339355	CCDC99, DLGAP5, BIRC5	266	15	13528	10.1714	1	0.400356	43.2335
GOTERM_BP_FAT	GO:0051303~establishment of chromosome localization	3	0.862069	0.0339355	CCDC99, DLGAP5, BIRC5	266	20	13528	7.62857	1	0.507355	62.2178
GOTERM_BP_FAT	GO:0030010~establishment of cell polarity	3	0.862069	0.0576207	CCDC99, CENPA, NDC80	266	49	13528	3.1137	1	0.888755	99.0926
GOTERM_BP_FAT	GO:0007163~establishment or maintenance of cell polarity	3	0.862069	0.249279	CCDC99, CENPA, NDC80	266	356	13528	0.714286	1	0.999947	100
GOTERM_BP_FAT	GO:0000902~cell morphogenesis	5	1.43678	0.921659	CCDC99, CENPA, NODAL, NDC80, ECT2	266	397	13528	0.640518	1	0.999992	100
GOTERM_BP_FAT	GO:0032989~cellular component morphogenesis	5	1.43678	0.954564	CCDC99, CENPA, NODAL, NDC80, ECT2
Annotation Cluster 12	Enrichment Score: 3.7758079397734785					List Total	Pop Hits	Pop Total	Fold Enrichment	Bonferroni	Benjamini	FDR
Category	Term	Count	%	PValue	Genes	236	274	12782	4.54636	1.72e-06	8.6e-08	8.62e-06
GOTERM_CC_FAT	GO:0005874~microtubule	23	6.6092	6.59e-09	CKAP2, KIF23, CDK1, KIFC1, KIF22, HAUS5, KIF11, PRC1, KIF15, KNTC1, NUSAP1, KIF18B, BIRC5, RACGAP1, CENPJ, GTSE1, TUBGCP3, KIF2C, SPAG5, SKA3, SKA2, HAUS8, KIF20A	348	231	19235	4.78554	1.16e-05	1.29e-06	5.71e-05
SP_PIR_KEYWORDS	microtubule	20	5.74713	4.35e-08	CKAP2, KIF23, KIFC1, KIF22, HAUS5, KIF11, PRC1, KIF15, NUSAP1, KIF18B, RACGAP1, CENPJ, GTSE1, TUBGCP3, KIF2C, SPAG5, SKA3, SKA2, HAUS8, KIF20A	296	42	16659	10.7201	0.00443421	0.00443421	0.0117725
INTERPRO	IPR019821:Kinesin, motor region, conserved site	8	2.29885	8.07e-06	KIF23, KIF2C, KIF22, KIFC1, KIF11, KIF15, KIF18B, KIF20A	296	42	16659	10.7201	0.00443421	0.00443421	0.0117725
INTERPRO	IPR001752:Kinesin, motor region	8	2.29885	8.07e-06	KIF23, KIF2C, KIF22, KIFC1, KIF11, KIF15, KIF18B, KIF20A	168	42	9079	10.2937	0.00128041	0.00128041	0.0114767
SMART	SM00129:KISc	8	2.29885	9.86e-06	KIF23, KIF2C, KIF22, KIFC1, KIF11, KIF15, KIF18B, KIF20A	348	43	19113	10.2181	0.0101543	0.00339628	0.0175393
UP_SEQ_FEATURE	domain:Kinesin-motor	8	2.29885	1.12e-05	KIF23, KIF2C, KIF22, KIFC1, KIF11, KIF15, KIF18B, KIF20A	231	77	12983	5.83932	0.168554	0.020301	0.591504
GOTERM_MF_FAT	GO:0003777~microtubule motor activity	8	2.29885	0.000419	KIF23, KIF2C, KIF22, KIFC1, KIF11, KIF15, KIF18B, KIF20A	236	102	12782	4.24792	0.510132	0.0260841	3.51282
GOTERM_CC_FAT	GO:0005875~microtubule associated complex	8	2.29885	0.00273044	KIF23, KIF2C, KIFC1, HAUS5, KIF11, KIF15, BIRC5, HAUS8	348	132	19235	3.76861	0.52037	0.0268457	3.54743
SP_PIR_KEYWORDS	motor protein	9	2.58621	0.00274805	KIF23, KIF2C, KIF22, KIFC1, KIF11, KIF15, KIF18B, MYO9B, KIF20A	231	142	12983	3.56219	0.810701	0.14042	5.20883
GOTERM_MF_FAT	GO:0003774~motor activity	9	2.58621	0.00377564	KIF23, KIF2C, KIF22, KIFC1, KIF11, KIF15, KIF18B, MYO9B, KIF20A	236	18	12782	12.0358	0.656162	0.0361439	5.20917
GOTERM_CC_FAT	GO:0005871~kinesin complex	4	1.14943	0.004082	KIF23, KIF2C, KIF11, KIF15	266	113	13528	3.60051	0.999897	0.133572	10.5635
GOTERM_BP_FAT	GO:0007018~microtubule-based movement	8	2.29885	0.00678404	KIF23, KIF2C, KIF22, KIFC1, KIF11, KIF15, KIF18B, KIF20A	348	107	19235	2.58285	1	0.573655	83.5039
SP_PIR_KEYWORDS	nucleotide binding	5	1.43678	0.128287	KIF23, KIFC1, KIF11, MYO9B, TK1	348	116	19235	2.38246	1	0.615479	89.5149
SP_PIR_KEYWORDS	P-loop	5	1.43678	0.157871	KIF23, KIFC1, KIF11, MYO9B, TK1
Annotation Cluster 13	Enrichment Score: 3.5987334256080996					List Total	Pop Hits	Pop Total	Fold Enrichment	Bonferroni	Benjamini	FDR
Category	Term	Count	%	PValue	Genes	348	50	19235	8.84368	0.00798146	0.000445	0.0393854
SP_PIR_KEYWORDS	cyclin	8	2.29885	3e-05	CCNE2, CCNE1, CCNB2, PTGIS, CCNF, CABLES2, CDK6, CCNA2	296	40	16659	9.84907	0.0366561	0.0184992	0.0988842
INTERPRO	IPR006670:Cyclin	7	2.01149	6.78e-05	CCNE2, CCNE1, CCNB2, CCNF, RBL1, CABLES2, CCNA2	168	40	9079	9.45729	0.0104652	0.00524636	0.0941976
SMART	SM00385:CYCLIN	7	2.01149	8.09e-05	CCNE2, CCNE1, CCNB2, CCNF, RBL1, CABLES2, CCNA2	296	14	16659	20.1001	0.045145	0.0152807	0.122306
INTERPRO	IPR004367:Cyclin, C-terminal	5	1.43678	8.38e-05	CCNE2, CCNE1, CCNB2, CCNF, CCNA2	296	33	16659	10.2328	0.136343	0.0359815	0.387562
INTERPRO	IPR006671:Cyclin, N-terminal	6	1.72414	0.000266	CCNE2, CCNE1, CCNB2, CCNF, CABLES2, CCNA2	296	37	16659	9.12655	0.2244	0.0495538	0.670944
INTERPRO	IPR013763:Cyclin-related	6	1.72414	0.000461	CCNE2, CCNE1, CCNB2, CCNF, RBL1, CCNA2	110	11	7396	24.4496	0.0616749	0.0616749	0.551302
PIR_SUPERFAMILY	PIRSF001771:cyclin, A/B/D/E types	4	1.14943	0.000471	CCNE2, CCNE1, CCNB2, CCNA2	110	12	7396	22.4121	0.0805471	0.0411189	0.726618
PIR_SUPERFAMILY	PIRSF001771:Cyclin_A_B_D_E	4	1.14943	0.000622	CCNE2, CCNE1, CCNB2, CCNA2	296	12	16659	18.7601	0.446854	0.0939754	1.55643
INTERPRO	IPR014400:Cyclin, A/B/D/E	4	1.14943	0.00107407	CCNE2, CCNE1, CCNB2, CCNA2	100	68	5085	5.23456	0.17104	0.0368217	2.11152
KEGG_PATHWAY	hsa04115:p53 signaling pathway	7	2.01149	0.00193198	CCNE2, CDK1, CCNE1, PPM1D, CCNB2, CDK6, GTSE1
Annotation Cluster 14	Enrichment Score: 3.3177883991821826					List Total	Pop Hits	Pop Total	Fold Enrichment	Bonferroni	Benjamini	FDR
Category	Term	Count	%	PValue	Genes	266	35	13528	10.1714	0.069919	0.0021296	0.0881491
GOTERM_BP_FAT	GO:0031023~microtubule organizing center organization	7	2.01149	5.38e-05	CEP72, HAUS5, KIF11, NEK2, HAUS8, CENPJ, BRCA1	266	32	13528	9.53571	0.386764	0.0118561	0.593188
GOTERM_BP_FAT	GO:0051297~centrosome organization	6	1.72414	0.000363	HAUS5, KIF11, NEK2, HAUS8, CENPJ, BRCA1	266	19	13528	10.7068	0.999555	0.115296	8.96238
GOTERM_BP_FAT	GO:0007098~centrosome cycle	4	1.14943	0.00570889	KIF11, NEK2, CENPJ, BRCA1
Annotation Cluster 15	Enrichment Score: 3.2852282964199198					List Total	Pop Hits	Pop Total	Fold Enrichment	Bonferroni	Benjamini	FDR
Category	Term	Count	%	PValue	Genes	266	98	13528	6.22741	0.00442578	0.000158	0.00539648
GOTERM_BP_FAT	GO:0051327~M phase of meiotic cell cycle	12	3.44828	3.29e-06	RAD1, NEK2, FANCD2, PLK1, SGOL1, LIG3, FBXO5, ESPL1, UTP14C, TRIP13, CDC25B, RAD51	266	98	13528	6.22741	0.00442578	0.000158	0.00539648
GOTERM_BP_FAT	GO:0007126~meiosis	12	3.44828	3.29e-06	RAD1, NEK2, FANCD2, PLK1, SGOL1, LIG3, FBXO5, ESPL1, UTP14C, TRIP13, CDC25B, RAD51	266	100	13528	6.10286	0.00540182	0.000187	0.00658978
GOTERM_BP_FAT	GO:0051321~meiotic cell cycle	12	3.44828	4.02e-06	RAD1, NEK2, FANCD2, PLK1, SGOL1, LIG3, FBXO5, ESPL1, UTP14C, TRIP13, CDC25B, RAD51	266	42	13528	7.26531	0.82835	0.0384052	2.12129
GOTERM_BP_FAT	GO:0007127~meiosis I	6	1.72414	0.00130649	RAD1, FANCD2, LIG3, ESPL1, TRIP13, RAD51	266	395	13528	1.15877	1	0.982299	99.999
GOTERM_BP_FAT	GO:0007276~gamete generation	9	2.58621	0.50356	SPAG9, FANCD2, LIG3, FBXO5, PTTG1, RACGAP1, UTP14C, TRIP13, CDC25B	266	458	13528	0.999376	1	0.995878	100
GOTERM_BP_FAT	GO:0019953~sexual reproduction	9	2.58621	0.679088	SPAG9, FANCD2, LIG3, FBXO5, PTTG1, RACGAP1, UTP14C, TRIP13, CDC25B
Annotation Cluster 16	Enrichment Score: 2.812871497629717					List Total	Pop Hits	Pop Total	Fold Enrichment	Bonferroni	Benjamini	FDR
Category	Term	Count	%	PValue	Genes	100	36	5085	9.8875	0.0054933	0.00137616	0.0626497
KEGG_PATHWAY	hsa03030:DNA replication	7	2.01149	5.68e-05	RFC3, POLD1, LIG1, POLE, MCM2, MCM3, MCM5	266	58	13528	7.01478	0.161889	0.00503315	0.214638
GOTERM_BP_FAT	GO:0006261~DNA-dependent DNA replication	8	2.29885	0.000131	CCNE2, RFC3, CDC45, POLD1, MCM2, MCM3, MCM5, RAD51	266	16	13528	15.8929	0.254223	0.00749302	0.356245
GOTERM_BP_FAT	GO:0006270~DNA replication initiation	5	1.43678	0.000218	CCNE2, CDC45, MCM2, MCM3, MCM5	296	53	16659	6.37137	0.735595	0.153194	3.46276
INTERPRO	IPR012340:Nucleic acid-binding, OB-fold	6	1.72414	0.00241138	LIG1, LIG3, MCM2, MCM3, POT1, MCM5	296	8	16659	21.1052	0.989022	0.275503	11.2661
INTERPRO	IPR018525:DNA-dependent ATPase MCM, conserved site	3	0.862069	0.0081551	MCM2, MCM3, MCM5	348	8	19113	20.5959	0.999593	0.579946	12.5553
UP_SEQ_FEATURE	domain:MCM	3	0.862069	0.00856044	MCM2, MCM3, MCM5	296	9	16659	18.7601	0.996785	0.301448	14.1064
INTERPRO	IPR001208:DNA-dependent ATPase MCM	3	0.862069	0.0103632	MCM2, MCM3, MCM5	168	9	9079	18.0139	0.766367	0.215206	12.2125
SMART	SM00350:MCM	3	0.862069	0.0111223	MCM2, MCM3, MCM5
Annotation Cluster 17	Enrichment Score: 2.7754335948708473					List Total	Pop Hits	Pop Total	Fold Enrichment	Bonferroni	Benjamini	FDR
Category	Term	Count	%	PValue	Genes	40	25	1437	11.496	0.000178	0.000178	0.00225023
BIOCARTA	h_cellcyclePathway:Cyclins and Cell Cycle Regulation	8	2.29885	2.09e-06	E2F1, CDK1, CCNE1, CDKN2D, RBL1, CDK6, CDC25A, TFDP1	348	31	19235	10.698	0.0556528	0.00272302	0.281093
SP_PIR_KEYWORDS	cell cycle control	6	1.72414	0.000214	CDK1, CCNE1, CDK6, CCNA2, CDC25A, CDC25B	40	29	1437	7.43276	0.068519	0.0348673	0.894386
BIOCARTA	h_g1Pathway:Cell Cycle: G1/S Check Point	6	1.72414	0.000835	E2F1, CDK1, CCNE1, CDK6, CDC25A, TFDP1	40	24	1437	7.48438	0.247039	0.0902457	3.52769
BIOCARTA	h_RacCycDPathway:Influence of Ras and Rho proteins on G1 to S Transition	5	1.43678	0.00333258	E2F1, CCNE1, PIK3CA, CDK6, TFDP1	40	9	1437	11.975	0.86059	0.279918	22.0726
BIOCARTA	h_fbw7Pathway:Cyclin E Destruction Pathway	3	0.862069	0.0229138	E2F1, CCNE1, TFDP1	40	10	1437	10.7775	0.91175	0.293052	26.4546
BIOCARTA	h_skp2e2fPathway:E2F1 Destruction Pathway	3	0.862069	0.0281558	E2F1, CCNE1, TFDP1	40	13	1437	8.29038	0.982324	0.396157	39.9978
BIOCARTA	h_p27Pathway:Regulation of p27 Phosphorylation during Cell Cycle Progression	3	0.862069	0.0463674	E2F1, CCNE1, TFDP1
Annotation Cluster 18	Enrichment Score: 2.244103257112576					List Total	Pop Hits	Pop Total	Fold Enrichment	Bonferroni	Benjamini	FDR
Category	Term	Count	%	PValue	Genes	348	962	19113	2.56914	1.48e-05	1.48e-05	2.55e-05
UP_SEQ_FEATURE	nucleotide phosphate-binding region:ATP	45	12.931	1.63e-08	KIF23, KIFC1, KIF22, NEK2, DCK, TTK, UBA6, PKMYT1, ATP10D, MYO9B, LATS2, TK1, KIF2C, VRK1, DDX49, DHX37, MAP3K9, BUB1, TOP2A, ERCC6L, TRIP13, TEC, CDK1, CDC6, KIF11, KIF15, KIF18B, TRIO, ATAD2, CDK6, ATAD5, MCM2, MCM3, C9ORF167, MCM5, STK3, SRPK1, RAD51, PLK4, PLK1, MAPK14, CHTF18, RIPK4, MELK, KIF20A	348	542	19113	2.22932	0.583929	0.196859	1.49578
UP_SEQ_FEATURE	binding site:ATP	22	6.32184	0.000965	CDK1, NEK2, LIG1, LIG3, PKMYT1, TRIO, TTK, CDK6, STK3, LATS2, SRPK1, KIF2C, PLK4, VRK1, PLK1, MAPK14, MAP3K9, BUB1, RIPK4, TOP2A, MELK, TEC	348	381	19235	2.46625	0.348002	0.0176636	2.08063
SP_PIR_KEYWORDS	serine/threonine-protein kinase	17	4.88506	0.00160064	CDK1, NEK2, PKMYT1, TRIO, TTK, CDK6, LATS2, SRPK1, STK3, PLK4, VRK1, PLK1, MAPK14, MAP3K9, BUB1, RIPK4, MELK	296	354	16659	2.54375	0.603331	0.123741	2.41981
INTERPRO	IPR008271:Serine/threonine protein kinase, active site	16	4.5977	0.00167673	CDK1, NEK2, PKMYT1, TRIO, TTK, CDK6, LATS2, SRPK1, STK3, VRK1, PLK1, MAPK14, MAP3K9, BUB1, RIPK4, MELK	348	1394	19235	1.62568	0.478454	0.024726	3.14936
SP_PIR_KEYWORDS	transferase	41	11.7816	0.00243507	TPST1, NEK2, GBGT1, EZH2, DCK, NFS1, TTK, PKMYT1, LATS2, TK1, POMT2, VRK1, MAP3K9, POMT1, BUB1, PIK3CA, TEC, KAT2A, CDK1, ZDHHC4, FUT11, POLE, SUV39H1, TRIO, CDK6, GALNTL1, STK3, SRPK1, ESCO2, PLK4, PLK1, MAPK14, POLD1, CHST9, DNMT1, RIPK4, MGAT5, CARM1, MELK, UTP14C, CLOCK	296	455	16659	2.22648	0.826988	0.17711	4.54136
INTERPRO	IPR017441:Protein kinase, ATP binding site	18	5.17241	0.00317896	CDK1, NEK2, PKMYT1, TRIO, TTK, CDK6, LATS2, SRPK1, STK3, PLK4, VRK1, PLK1, MAPK14, MAP3K9, BUB1, RIPK4, MELK, TEC	231	430	12983	2.222	0.842757	0.142868	5.7724
GOTERM_MF_FAT	GO:0004674~protein serine/threonine kinase activity	17	4.88506	0.00419563	CDK1, NEK2, PKMYT1, TRIO, TTK, CDK6, LATS2, SRPK1, STK3, PLK4, VRK1, PLK1, MAPK14, MAP3K9, BUB1, RIPK4, MELK	296	359	16659	2.35155	0.934803	0.219806	6.97777
INTERPRO	IPR017442:Serine/threonine protein kinase-related	15	4.31034	0.00494299	CDK1, NEK2, PKMYT1, TRIO, TTK, CDK6, LATS2, SRPK1, STK3, PLK4, PLK1, MAP3K9, MAPK14, RIPK4, MELK	296	476	16659	2.12825	0.936627	0.205382	7.04767
INTERPRO	IPR000719:Protein kinase, core	18	5.17241	0.00499424	CDK1, NEK2, PKMYT1, TRIO, TTK, CDK6, LATS2, SRPK1, STK3, PLK4, VRK1, PLK1, MAPK14, MAP3K9, BUB1, RIPK4, MELK, TEC	231	606	12983	1.94764	0.914105	0.16082	7.58591
GOTERM_MF_FAT	GO:0004672~protein kinase activity	21	6.03448	0.00556317	CDK1, NEK2, EFNA3, PKMYT1, TRIO, TTK, CDK6, IRS1, STK3, LATS2, SRPK1, PLK4, VRK1, PLK1, MAPK14, MAP3K9, BUB1, RIPK4, FASTKD5, MELK, TEC	348	469	19113	2.1079	0.993908	0.51746	8.39327
UP_SEQ_FEATURE	domain:Protein kinase	18	5.17241	0.00560192	CDK1, NEK2, PKMYT1, TRIO, TTK, CDK6, LATS2, SRPK1, STK3, PLK4, VRK1, PLK1, MAPK14, MAP3K9, BUB1, RIPK4, MELK, TEC	348	688	19235	1.84779	0.852781	0.0639284	8.98808
SP_PIR_KEYWORDS	kinase	23	6.6092	0.00714973	CDK1, NEK2, DCK, PKMYT1, TRIO, TTK, CDK6, ZMYND8, STK3, LATS2, SRPK1, TK1, SPAG9, PLK4, VRK1, PLK1, MAPK14, MAP3K9, BUB1, PIK3CA, RIPK4, MELK, TEC	348	201	19235	2.7499	0.946086	0.0846931	13.3732
SP_PIR_KEYWORDS	phosphotransferase	10	2.87356	0.0108781	CDK1, PLK1, MAPK14, MAP3K9, DCK, TTK, PIK3CA, CDK6, TK1, TEC	296	259	16659	2.39029	0.999936	0.398337	22.5647
INTERPRO	IPR002290:Serine/threonine protein kinase	11	3.16092	0.0173667	CDK1, PLK4, NEK2, PLK1, MAPK14, TRIO, TTK, CDK6, MELK, LATS2, STK3	168	259	9079	2.29521	0.937998	0.327818	22.0488
SMART	SM00220:S_TKc	11	3.16092	0.021162	CDK1, PLK4, NEK2, PLK1, MAPK14, TRIO, TTK, CDK6, MELK, LATS2, STK3	348	658	19113	1.66937	1	0.932031	39.8485
UP_SEQ_FEATURE	active site:Proton acceptor	20	5.74713	0.0320477	CDK1, NEK2, PKMYT1, TTK, LSS, CDK6, LATS2, SRPK1, STK3, RDH11, PLK4, VRK1, PLK1, MAPK14, MAP3K9, BUB1, RIPK4, MELK, TEC, NSDHL	266	667	13528	1.6012	1	0.42858	47.2722
GOTERM_BP_FAT	GO:0006468~protein amino acid phosphorylation	21	6.03448	0.038273	CDK1, NEK2, PKMYT1, TRIO, TTK, CDK6, STK3, LATS2, SRPK1, S1PR2, SPAG9, PLK4, VRK1, PLK1, MAPK14, MAP3K9, BUB1, PIK3CA, RIPK4, MELK, TEC	266	973	13528	1.41125	1	0.546176	67.2089
GOTERM_BP_FAT	GO:0006796~phosphate metabolic process	27	7.75862	0.0657267	NEK2, PKMYT1, TTK, DUSP11, LATS2, S1PR2, VRK1, MAP3K9, BUB1, PIK3CA, TEC, CDK1, TRIO, CDK6, SRPK1, CDC25A, STK3, CDC25B, PPM1F, SPAG9, PLK4, PPM1D, PLK1, MAPK14, RIPK4, DUSP7, MELK	266	973	13528	1.41125	1	0.546176	67.2089
GOTERM_BP_FAT	GO:0006793~phosphorus metabolic process	27	7.75862	0.0657267	NEK2, PKMYT1, TTK, DUSP11, LATS2, S1PR2, VRK1, MAP3K9, BUB1, PIK3CA, TEC, CDK1, TRIO, CDK6, SRPK1, CDC25A, STK3, CDC25B, PPM1F, SPAG9, PLK4, PPM1D, PLK1, MAPK14, RIPK4, DUSP7, MELK	266	800	13528	1.335	1	0.778371	93.7221
GOTERM_BP_FAT	GO:0016310~phosphorylation	21	6.03448	0.155308	CDK1, NEK2, PKMYT1, TRIO, TTK, CDK6, STK3, LATS2, SRPK1, S1PR2, SPAG9, PLK4, VRK1, PLK1, MAPK14, MAP3K9, BUB1, PIK3CA, RIPK4, MELK, TEC	266	370	13528	1.37452	1	0.924326	99.7185
GOTERM_BP_FAT	GO:0007243~protein kinase cascade	10	2.87356	0.300991	S1PR2, SPAG9, MAPK14, MAP3K9, PIK3CA, IRS1, LATS2, STK3, SRPK1, TEC
Annotation Cluster 19	Enrichment Score: 2.2141148522699954					List Total	Pop Hits	Pop Total	Fold Enrichment	Bonferroni	Benjamini	FDR
Category	Term	Count	%	PValue	Genes	296	144	16659	3.51753	0.899058	0.204927	5.89427
INTERPRO	IPR003593:ATPase, AAA+ type, core	9	2.58621	0.00415326	CDC6, RFC3, CHTF18, ATAD2, ATAD5, MCM3, C9ORF167, TRIP13, RAD51	168	144	9079	3.3776	0.480268	0.195993	5.69399
SMART	SM00382:AAA	9	2.58621	0.00502151	CDC6, RFC3, CHTF18, ATAD2, ATAD5, MCM3, C9ORF167, TRIP13, RAD51	296	49	16659	5.7429	0.997649	0.299566	14.8157
INTERPRO	IPR003959:ATPase, AAA-type, core	5	1.43678	0.0109253	CDC6, CHTF18, ATAD2, ATAD5, TRIP13
Annotation Cluster 20	Enrichment Score: 2.1200194947618383					List Total	Pop Hits	Pop Total	Fold Enrichment	Bonferroni	Benjamini	FDR
Category	Term	Count	%	PValue	Genes	100	36	5085	9.8875	0.0054933	0.00137616	0.0626497
KEGG_PATHWAY	hsa03030:DNA replication	7	2.01149	5.68e-05	RFC3, POLD1, LIG1, POLE, MCM2, MCM3, MCM5	266	9	13528	22.6032	0.537608	0.0181977	0.934073
GOTERM_BP_FAT	GO:0000731~DNA synthesis during DNA repair	4	1.14943	0.000572	RFC3, POLD1, CDKN2D, POLE	266	17	13528	11.9664	0.99619	0.0963143	6.55234
GOTERM_BP_FAT	GO:0006297~nucleotide-excision repair, DNA gap filling	4	1.14943	0.00412356	RFC3, POLD1, LIG1, POLE	100	35	5085	5.81143	0.947211	0.307662	28.441
KEGG_PATHWAY	hsa03410:Base excision repair	4	1.14943	0.0298691	POLD1, LIG1, POLE, LIG3	100	44	5085	4.62273	0.995109	0.412592	45.4087
KEGG_PATHWAY	hsa03420:Nucleotide excision repair	4	1.14943	0.053372	RFC3, POLD1, LIG1, POLE	100	23	5085	6.63261	0.99935	0.486791	56.6047
KEGG_PATHWAY	hsa03430:Mismatch repair	3	0.862069	0.072857	RFC3, POLD1, LIG1	266	55	13528	3.6987	1	0.636058	79.7836
GOTERM_BP_FAT	GO:0006289~nucleotide-excision repair	4	1.14943	0.0928767	RFC3, POLD1, LIG1, POLE
Annotation Cluster 21	Enrichment Score: 1.8839875662075705					List Total	Pop Hits	Pop Total	Fold Enrichment	Bonferroni	Benjamini	FDR
Category	Term	Count	%	PValue	Genes	296	24	16659	9.38007	0.990667	0.267733	11.6467
INTERPRO	IPR001357:BRCT	4	1.14943	0.00844716	DBF4, LIG3, ECT2, BRCA1	168	24	9079	9.00694	0.703759	0.215976	10.3254
SMART	SM00292:BRCT	4	1.14943	0.00931467	DBF4, LIG3, ECT2, BRCA1	348	12	19113	13.7306	1	0.828561	26.1466
UP_SEQ_FEATURE	domain:BRCT 1	3	0.862069	0.0192347	DBF4, ECT2, BRCA1	348	12	19113	13.7306	1	0.828561	26.1466
UP_SEQ_FEATURE	domain:BRCT 2	3	0.862069	0.0192347	DBF4, ECT2, BRCA1
Annotation Cluster 22	Enrichment Score: 1.8815022554958405					List Total	Pop Hits	Pop Total	Fold Enrichment	Bonferroni	Benjamini	FDR
Category	Term	Count	%	PValue	Genes	348	509	19235	2.17183	0.469776	0.0250589	3.07076
SP_PIR_KEYWORDS	ubl conjugation pathway	20	5.74713	0.00237342	ANAPC1, FBXL20, DTL, UBA6, UBE2C, BRCA1, FBXO38, SENP2, UHRF1, PIAS4, MTBP, USP12, RABGEF1, NSMCE2, FBXO5, SMURF2, CHFR, RNF34, CDCA3, SPOP	266	574	13528	1.94923	0.997735	0.101336	7.14188
GOTERM_BP_FAT	GO:0019941~modification-dependent protein catabolic process	22	6.32184	0.00450779	ANAPC1, CDK1, FBXL20, DTL, UBA6, UBE2C, BRCA1, FBXO38, SENP2, UHRF1, PIAS4, USP39, RABGEF1, MTBP, USP12, NSMCE2, FBXO5, SMURF2, CHFR, RNF34, CDCA3, SPOP	266	574	13528	1.94923	0.997735	0.101336	7.14188
GOTERM_BP_FAT	GO:0043632~modification-dependent macromolecule catabolic process	22	6.32184	0.00450779	ANAPC1, CDK1, FBXL20, DTL, UBA6, UBE2C, BRCA1, FBXO38, SENP2, UHRF1, PIAS4, USP39, RABGEF1, MTBP, USP12, NSMCE2, FBXO5, SMURF2, CHFR, RNF34, CDCA3, SPOP	266	600	13528	1.86476	0.999956	0.142944	11.484
GOTERM_BP_FAT	GO:0051603~proteolysis involved in cellular protein catabolic process	22	6.32184	0.00741036	ANAPC1, CDK1, FBXL20, DTL, UBA6, UBE2C, BRCA1, FBXO38, SENP2, UHRF1, PIAS4, USP39, RABGEF1, MTBP, USP12, NSMCE2, FBXO5, SMURF2, CHFR, RNF34, CDCA3, SPOP	266	603	13528	1.85548	0.999973	0.145307	12.0139
GOTERM_BP_FAT	GO:0044257~cellular protein catabolic process	22	6.32184	0.0077737	ANAPC1, CDK1, FBXL20, DTL, UBA6, UBE2C, BRCA1, FBXO38, SENP2, UHRF1, PIAS4, USP39, RABGEF1, MTBP, USP12, NSMCE2, FBXO5, SMURF2, CHFR, RNF34, CDCA3, SPOP	266	622	13528	1.79881	1	0.187845	16.2388
GOTERM_BP_FAT	GO:0030163~protein catabolic process	22	6.32184	0.0107463	ANAPC1, CDK1, FBXL20, DTL, UBA6, UBE2C, BRCA1, FBXO38, SENP2, UHRF1, PIAS4, USP39, RABGEF1, MTBP, USP12, NSMCE2, FBXO5, SMURF2, CHFR, RNF34, CDCA3, SPOP	266	725	13528	1.6134	1	0.360576	37.7085
GOTERM_BP_FAT	GO:0044265~cellular macromolecule catabolic process	23	6.6092	0.028449	ANAPC1, CDK1, FBXL20, DTL, UBA6, UBE2C, BRCA1, FBXO38, SENP2, UHRF1, PIAS4, USP39, RABGEF1, USP12, MTBP, NSMCE2, FBXO5, SMURF2, CHFR, RNF34, DEDD2, CDCA3, SPOP	266	781	13528	1.49771	1	0.494715	60.5524
GOTERM_BP_FAT	GO:0009057~macromolecule catabolic process	23	6.6092	0.0551388	ANAPC1, CDK1, FBXL20, DTL, UBA6, UBE2C, BRCA1, FBXO38, SENP2, UHRF1, PIAS4, USP39, RABGEF1, USP12, MTBP, NSMCE2, FBXO5, SMURF2, CHFR, RNF34, DEDD2, CDCA3, SPOP	266	1054	13528	1.20629	1	0.889652	99.084
GOTERM_BP_FAT	GO:0006508~proteolysis	25	7.18391	0.248844	UBA6, USP39, RABGEF1, USP12, MTBP, NSMCE2, FBXO5, ADAMTS12, RNF34, CDCA3, SPOP, ANAPC1, CDK1, DTL, FBXL20, ESPL1, UBE2C, TMPRSS3, BRCA1, FBXO38, SENP2, UHRF1, PIAS4, SMURF2, CHFR
Annotation Cluster 23	Enrichment Score: 1.8566426934407982					List Total	Pop Hits	Pop Total	Fold Enrichment	Bonferroni	Benjamini	FDR
Category	Term	Count	%	PValue	Genes	266	25	13528	10.1714	0.830651	0.0378686	2.13737
GOTERM_BP_FAT	GO:0010948~negative regulation of cell cycle process	5	1.43678	0.00131649	LIF, BUB1, TTK, ESPL1, BRCA1	266	22	13528	9.24675	0.999992	0.158869	13.3362
GOTERM_BP_FAT	GO:0030071~regulation of mitotic metaphase/anaphase transition	4	1.14943	0.00868943	DLGAP5, BUB1, TTK, ESPL1	266	82	13528	3.72125	1	0.316518	30.9546
GOTERM_BP_FAT	GO:0010639~negative regulation of organelle organization	6	1.72414	0.0223318	BUB1, DNMT1, TTK, ESPL1, POT1, BRCA1	266	142	13528	2.14889	1	0.766266	92.5704
GOTERM_BP_FAT	GO:0051129~negative regulation of cellular component organization	6	1.72414	0.146588	BUB1, DNMT1, TTK, ESPL1, POT1, BRCA1
Annotation Cluster 24	Enrichment Score: 1.579468879855077					List Total	Pop Hits	Pop Total	Fold Enrichment	Bonferroni	Benjamini	FDR
Category	Term	Count	%	PValue	Genes	348	65	19113	5.06976	0.997317	0.522945	9.67543
UP_SEQ_FEATURE	domain:Rho-GAP	6	1.72414	0.00649969	SYDE2, MYO9B, ARHGAP11A, DEPDC1B, DEPDC1, RACGAP1	296	67	16659	5.04004	0.974598	0.246128	9.27184
INTERPRO	IPR000198:RhoGAP	6	1.72414	0.00664376	SYDE2, MYO9B, ARHGAP11A, DEPDC1B, DEPDC1, RACGAP1	168	67	9079	4.83955	0.631332	0.220782	8.55101
SMART	SM00324:RhoGAP	6	1.72414	0.00764645	SYDE2, MYO9B, ARHGAP11A, DEPDC1B, DEPDC1, RACGAP1	231	413	12983	2.04129	0.998939	0.348204	19.7565
GOTERM_MF_FAT	GO:0060589~nucleoside-triphosphatase regulator activity	15	4.31034	0.015444	GRPEL2, IQGAP3, ASAP1, TRIO, MYO9B, CYTH3, DEPDC1, RACGAP1, ECT2, EIF2B1, PLEKHG1, SYDE2, RASGRP1, DEPDC1B, ARHGAP11A	231	404	12983	1.94764	0.999996	0.518493	32.9216
GOTERM_MF_FAT	GO:0030695~GTPase regulator activity	14	4.02299	0.0278419	IQGAP3, ASAP1, TRIO, MYO9B, CYTH3, DEPDC1, RACGAP1, ECT2, EIF2B1, PLEKHG1, SYDE2, RASGRP1, DEPDC1B, ARHGAP11A	348	159	19235	2.4334	1	0.393241	60.675
SP_PIR_KEYWORDS	GTPase activation	7	2.01149	0.0686382	SYDE2, ASAP1, MYO9B, ARHGAP11A, DEPDC1B, DEPDC1, RACGAP1	231	220	12983	2.04376	1	0.870819	76.4736
GOTERM_MF_FAT	GO:0005096~GTPase activator activity	8	2.29885	0.0972657	SYDE2, IQGAP3, ASAP1, MYO9B, ARHGAP11A, DEPDC1B, DEPDC1, RACGAP1	231	335	12983	1.50994	1	0.939065	98.0874
GOTERM_MF_FAT	GO:0008047~enzyme activator activity	9	2.58621	0.244061	SYDE2, DBF4, IQGAP3, ASAP1, MYO9B, ARHGAP11A, DEPDC1B, DEPDC1, RACGAP1
Annotation Cluster 25	Enrichment Score: 1.5020311353249454					List Total	Pop Hits	Pop Total	Fold Enrichment	Bonferroni	Benjamini	FDR
Category	Term	Count	%	PValue	Genes	266	18	13528	11.3016	0.998627	0.104027	7.70561
GOTERM_BP_FAT	GO:0000080~G1 phase of mitotic cell cycle	4	1.14943	0.00487734	E2F1, CDC6, MTBP, CDK6	266	21	13528	9.68707	0.999966	0.144517	11.7802
GOTERM_BP_FAT	GO:0051318~G1 phase	4	1.14943	0.00761321	E2F1, CDC6, MTBP, CDK6	266	361	13528	0.845271	1	0.999595	100
GOTERM_BP_FAT	GO:0008285~negative regulation of cell proliferation	6	1.72414	0.839762	CDC6, PPM1D, CDKN2D, MTBP, CDK6, DLG5
Annotation Cluster 26	Enrichment Score: 1.4512736245112257					List Total	Pop Hits	Pop Total	Fold Enrichment	Bonferroni	Benjamini	FDR
Category	Term	Count	%	PValue	Genes	266	105	13528	3.39048	1	0.264146	24.6944
GOTERM_BP_FAT	GO:0006310~DNA recombination	7	2.01149	0.0171444	RAD51AP1, LIG1, LIG3, NSMCE2, BRCA1, TRIP13, RAD51	266	62	13528	4.10138	1	0.396196	42.4451
GOTERM_BP_FAT	GO:0006302~double-strand break repair	5	1.43678	0.0331226	RAD51AP1, BRCA1, UIMC1, TRIP13, RAD51	266	19	13528	8.03008	1	0.483734	58.7209
GOTERM_BP_FAT	GO:0000724~double-strand break repair via homologous recombination	3	0.862069	0.0525206	RAD51AP1, BRCA1, RAD51	266	19	13528	8.03008	1	0.483734	58.7209
GOTERM_BP_FAT	GO:0000725~recombinational repair	3	0.862069	0.0525206	RAD51AP1, BRCA1, RAD51
Annotation Cluster 27	Enrichment Score: 1.4402334604738234					List Total	Pop Hits	Pop Total	Fold Enrichment	Bonferroni	Benjamini	FDR
Category	Term	Count	%	PValue	Genes	266	561	13528	1.9944	0.990406	0.0854819	5.49652
GOTERM_BP_FAT	GO:0031327~negative regulation of cellular biosynthetic process	22	6.32184	0.00344111	E2F1, CDC6, EIF2C2, PDGFB, STRN3, NODAL, RBL1, HR, EIF2B1, CBFA2T2, MXD3, POT1, BRCA1, UIMC1, CDC45, PIAS4, ID1, DNMT1, HIVEP1, SMURF2, COMMD7, DEDD2	266	573	13528	1.95263	0.997562	0.101871	7.05877
GOTERM_BP_FAT	GO:0009890~negative regulation of biosynthetic process	22	6.32184	0.00445348	E2F1, CDC6, EIF2C2, PDGFB, STRN3, NODAL, RBL1, HR, EIF2B1, CBFA2T2, MXD3, POT1, BRCA1, UIMC1, CDC45, PIAS4, ID1, DNMT1, HIVEP1, SMURF2, COMMD7, DEDD2	266	547	13528	1.95247	0.999438	0.113716	8.70377
GOTERM_BP_FAT	GO:0010558~negative regulation of macromolecule biosynthetic process	21	6.03448	0.0055369	E2F1, CDC6, EIF2C2, STRN3, NODAL, RBL1, HR, CBFA2T2, EIF2B1, MXD3, POT1, BRCA1, UIMC1, CDC45, PIAS4, ID1, DNMT1, HIVEP1, SMURF2, COMMD7, DEDD2	266	512	13528	1.88728	1	0.202556	17.9857
GOTERM_BP_FAT	GO:0045934~negative regulation of nucleobase, nucleoside, nucleotide and nucleic acid metabolic process	19	5.45977	0.0120168	E2F1, CDC6, STRN3, NODAL, RBL1, HR, CBFA2T2, MXD3, POT1, UIMC1, BRCA1, CDC45, PIAS4, ID1, DNMT1, HIVEP1, SMURF2, COMMD7, DEDD2	266	519	13528	1.86182	1	0.220797	20.3599
GOTERM_BP_FAT	GO:0051172~negative regulation of nitrogen compound metabolic process	19	5.45977	0.0137849	E2F1, CDC6, STRN3, NODAL, RBL1, HR, CBFA2T2, MXD3, POT1, UIMC1, BRCA1, CDC45, PIAS4, ID1, DNMT1, HIVEP1, SMURF2, COMMD7, DEDD2	266	734	13528	1.6629	1	0.266285	25.1792
GOTERM_BP_FAT	GO:0010605~negative regulation of macromolecule metabolic process	24	6.89655	0.0175313	E2F1, ANAPC1, CDC6, EIF2C2, STRN3, NODAL, RBL1, HR, UBE2C, EIF2B1, CBFA2T2, MXD3, POT1, BRCA1, UIMC1, CDC45, PIAS4, ID1, DNMT1, FBXO5, HIVEP1, SMURF2, COMMD7, DEDD2	266	459	13528	1.7728	1	0.424475	46.1194
GOTERM_BP_FAT	GO:0016481~negative regulation of transcription	16	4.5977	0.0370039	E2F1, STRN3, NODAL, RBL1, HR, CBFA2T2, UIMC1, BRCA1, MXD3, PIAS4, ID1, DNMT1, HIVEP1, SMURF2, COMMD7, DEDD2	266	504	13528	1.71542	1	0.437739	48.599
GOTERM_BP_FAT	GO:0010629~negative regulation of gene expression	17	4.88506	0.0397663	E2F1, EIF2C2, STRN3, NODAL, RBL1, HR, CBFA2T2, UIMC1, BRCA1, MXD3, PIAS4, ID1, DNMT1, HIVEP1, SMURF2, COMMD7, DEDD2	266	266	13528	1.52954	1	0.903775	99.3894
GOTERM_BP_FAT	GO:0000122~negative regulation of transcription from RNA polymerase II promoter	8	2.29885	0.26719	E2F1, PIAS4, ID1, STRN3, NODAL, RBL1, DNMT1, HIVEP1	231	316	12983	1.42287	1	0.959019	99.6091
GOTERM_MF_FAT	GO:0016564~transcription repressor activity	8	2.29885	0.324344	E2F1, PIAS4, ID1, STRN3, EZH2, HR, HIVEP1, CBFA2T2	266	356	13528	1.28571	1	0.962124	99.9757
GOTERM_BP_FAT	GO:0045892~negative regulation of transcription, DNA-dependent	9	2.58621	0.398018	E2F1, PIAS4, ID1, STRN3, NODAL, RBL1, DNMT1, HIVEP1, CBFA2T2	266	362	13528	1.2644	1	0.966018	99.9856
GOTERM_BP_FAT	GO:0051253~negative regulation of RNA metabolic process	9	2.58621	0.416904	E2F1, PIAS4, ID1, STRN3, NODAL, RBL1, DNMT1, HIVEP1, CBFA2T2
Annotation Cluster 28	Enrichment Score: 1.3956051229526902					List Total	Pop Hits	Pop Total	Fold Enrichment	Bonferroni	Benjamini	FDR
Category	Term	Count	%	PValue	Genes	266	29	13528	7.01478	1	0.277737	26.5651
GOTERM_BP_FAT	GO:0070646~protein modification by small protein removal	4	1.14943	0.0186507	KAT2A, SENP2, USP12, UIMC1	266	160	13528	2.54286	1	0.431061	47.1728
GOTERM_BP_FAT	GO:0070647~protein modification by small protein conjugation or removal	8	2.29885	0.0381625	KAT2A, SENP2, PIAS4, USP12, CHFR, UBE2C, BRCA1, UIMC1	266	26	13528	5.86813	1	0.632626	79.2298
GOTERM_BP_FAT	GO:0016579~protein deubiquitination	3	0.862069	0.0913805	KAT2A, USP12, UIMC1

## Sheet: Table S6G-ER-FDR0.1
Table S6G (related to Figure 6): Differentially expressed genes between ER+ and ER- at FDR ≤ 0.1; used to draw Figure S6A
Gene	T32510	T401130	T401188	T402421	T403802		T115	T159	T341400	T406434	T518	T5	T76		t-value	p-value	average ER+	average ER-	q-value
P2RY11	1e-06	1e-06	1e-06	1e-06	1e-06		0.742467	0.233416	0.312732	0.655439	1.6458	0.0384232	0.697212		-28.2061	1.31424e-07	1e-06	0.617927	7.04077e-06
TCF25	141.923	143.097	150.785	118.834	145.486		68.757	58.3671	80.9343	57.2788	70.1028	53.133	69.3252		11.0699	6.60559e-07	140.025	65.414	1.40815e-05
ATG16L2	7.20709	5.77775	4.87705	5.95119	5.19872		1.40285	1.64804	2.76877	1.41375	1.4775	1.90391	1.63443		10.8114	8.35756e-07	5.80236	1.74989	2.11223e-05
TTC36	1.55421	1.40621	3.7526	0.537878	1.4683		1e-06	1e-06	1e-06	1e-06	1e-06	1e-06	1e-06		46.1145	1.32264e-06	1.74384	1e-06	2.81631e-05
UROD	70.5513	76.6615	83.4153	79.9242	96.4685		37.6129	45.1155	45.0425	37.1482	39.7667	35.1185	32.9129		10.7371	2.08663e-06	81.4042	38.9596	3.52038e-05
PKMYT1	7.74735	4.95151	7.78353	6.60591	6.06972		21.4939	24.8332	20.3338	25.873	15.4167	17.0611	24.1192		-10.3751	2.63846e-06	6.6316	21.3044	4.22446e-05
PC	59.9594	61.4209	72.6283	79.2638	102.998		19.1042	14.1453	23.9486	19.0314	33.3847	19.7393	21.3921		9.0458	5.17442e-06	75.2541	21.5351	4.92854e-05
TK1	18.5747	14.9095	22.3917	12.773	17.8336		71.6678	67.4544	50.0997	52.9418	59.7585	55.7503	141.266		-8.34073	8.92034e-06	17.2965	71.2769	5.63261e-05
SLC13A3	19.4201	33.4674	52.3932	131.957	36.8642		0.109329	1.68727	1.63281	0.362386	1.00575	0.452129	0.0773653		8.0994	1.27033e-05	54.8204	0.761006	6.33669e-05
CYP1B1	250.19	273.583	220.682	449.373	169.767		45.9041	38.981	23.3136	13.6057	28.8653	65.9606	13.2773		7.92769	1.44803e-05	272.719	32.8439	7.04077e-05
CCDC75	6.58426	7.20525	6.98192	5.9691	8.34982		14.5572	11.2252	12.5808	12.1145	10.9916	15.9766	14.4299		-8.07982	1.47634e-05	7.01807	13.1251	7.74484e-05
CEP55	3.13442	2.6296	2.96183	2.5519	1.74122		6.6856	9.08549	8.58743	10.4467	14.3449	5.28998	9.36034		-7.77041	1.53662e-05	2.60379	9.11435	8.44892e-05
TERF2IP	143.398	137.097	141.112	146.024	154.04		81.0858	79.3607	73.5776	77.5845	98.0774	68.0507	101.598		9.62359	1.90749e-05	144.334	82.7621	9.153e-05
IST1	111.844	106.947	123.474	100.124	98.0196		67.7007	66.6691	69.8594	59.2187	81.6907	64.6116	74.0364		7.90787	2.00727e-05	108.082	69.1124	9.85707e-05
ABCC11	238.652	277.944	148.521	613.962	303.856		3.16695	6.91932	25.4351	2.83879	4.4371	1.58088	0.455655		8.4677	2.04423e-05	316.587	6.40483	0.000105611
LINS	33.5261	30.4588	29.9152	30.8218	25.4536		19.8568	17.8936	18.4657	17.3592	21.2791	15.3141	20.1921		7.81912	2.22557e-05	30.0351	18.6229	0.000112652
NUF2	4.42188	4.93521	7.23612	4.07764	5.00113		16.9998	11.8302	16.2242	12.2753	14.8006	13.5866	29.9667		-7.41499	2.27824e-05	5.1344	16.5262	0.000119693
GABARAP	376.035	427.509	384.49	422.44	448.224		248.375	260.389	332.173	269.938	312.494	249.739	265.957		7.39665	2.3464e-05	411.74	277.009	0.000126734
NIPA1	5.08359	5.25878	3.51338	4.31209	4.98953		11.0994	10.6709	9.42004	11.8456	8.05949	11.6339	8.73655		-8.46063	2.64933e-05	4.63147	10.2094	0.000133775
ESR1	29.0279	24.3441	8.61703	23.3251	12.7495		2.09486	1.52287	2.29343	0.617321	0.41479	2.76315	0.502633		7.26572	2.77468e-05	19.6127	1.45844	0.000140815
TRAIP	2.69286	2.13962	2.80838	1.78788	2.65742		4.76009	6.8619	6.50964	6.15207	6.57847	3.76457	6.46423		-7.32414	3.30377e-05	2.41723	5.87014	0.000147856
MCEE	160.938	105.396	162.009	139.781	142.133		45.2531	31.7855	58.6753	58.9442	76.8242	48.0106	66.8697		7.17531	3.31481e-05	142.051	55.1947	0.000154897
IQGAP2	66.7419	44.8969	78.7743	86.5434	50.7624		20.6163	16.9965	15.9707	9.71103	13.475	17.9305	30.8982		7.15507	3.3613e-05	65.5438	17.9426	0.000161938
POLE	6.66077	3.77415	4.19695	4.25904	3.88062		11.2934	10.406	13.3033	21.1632	10.4896	10.8629	13.8901		-7.4229	3.43014e-05	4.55431	13.0584	0.000168978
KTI12	33.96	46.9123	41.0295	40.5857	44.4576		22.9049	22.6024	31.4186	20.8902	25.4011	21.6641	22.1727		7.28306	3.65081e-05	41.389	23.8649	0.000176019
ACADVL	150.805	220.631	183.924	192.141	171.151		78.225	88.3874	116.329	114.124	93.1966	62.6694	92.8537		6.82737	4.63505e-05	183.73	92.255	0.00018306
PLSCR1	69.9694	47.9461	48.9616	46.4957	33.7389		15.5583	18.7712	11.25	8.13298	11.2289	13.8097	25.3548		6.75472	5.01289e-05	49.4223	14.8723	0.000190101
INPP5B	29.8438	23.2947	30.1566	21.3912	24.386		10.3301	15.203	15.0286	13.5032	15.5923	10.7278	13.5722		7.03064	5.30814e-05	25.8145	13.4225	0.000197141
TMEM45B	53.3557	74.1642	65.2128	150.237	37.2191		2.19173	10.6417	19.5978	6.11354	7.94241	2.80731	5.57073		6.5465	6.50386e-05	76.0378	7.83789	0.000204182
PRMT7	41.4844	38.8593	40.0824	40.8691	43.6674		16.2256	20.8955	28.6791	22.2223	24.7968	18.3872	23.1969		8.57412	6.55669e-05	40.9925	22.0576	0.000211223
USP12	16.6567	16.3691	18.4792	18.2431	13.4116		25.5368	31.0024	29.2993	32.8679	33.8513	41.6619	53.4183		-6.75158	6.69622e-05	16.6319	35.3768	0.000218264
SLC25A3	167.468	183.353	222.885	159.438	202.498		80.0683	109.972	103.036	98.4302	127.996	65.1262	80.9667		6.53818	7.12567e-05	187.128	95.0851	0.000225304
PCDH7	116.074	146.198	85.9016	190.68	68.4334		17.1356	27.4674	24.0348	11.4229	34.4125	24.1983	6.82527		6.46797	7.25188e-05	121.457	20.7853	0.000232345
KIAA0101	8.17616	7.54462	11.3993	7.45786	5.21259		28.3238	19.2519	14.3205	24.8509	23.1498	27.5866	40.1419		-6.56306	7.99734e-05	7.95811	25.3751	0.000239386
LDHD	13.212	9.76239	24.9861	12.0043	14.8471		2.06306	1.05379	2.55984	1.82676	4.62118	1.53238	0.437163		6.73044	8.36951e-05	14.9624	2.01345	0.000246427
DNAJC9	18.8031	12.7512	16.1672	11.7653	13.9991		39.1029	30.8881	25.2292	44.8475	24.8679	36.3156	56.5376		-6.32073	9.04267e-05	14.6972	36.827	0.000253468
CDK16	43.4638	47.6279	48.4651	47.0554	48.328		71.6236	52.5648	71.36	73.3963	67.6742	72.8121	62.6719		-7.16238	9.08152e-05	46.988	67.4433	0.000260508
ATP6V0D1	103.87	111.81	107.818	146.122	131.785		59.8506	59.5635	70.9046	65.1177	78.1975	63.0067	58.5336		7.99282	9.41897e-05	120.281	65.0249	0.000267549
BHLHA15	12.7874	11.2763	19.0236	9.27146	13.7829		0.820997	1.07389	3.49303	2.39035	1.7754	4.98915	2.40344		6.86026	9.46313e-05	13.2283	2.42089	0.00027459
MYBL2	15.5643	12.8585	26.0318	10.7555	10.6697		70.0505	38.1985	60.2703	74.0178	49.9246	51.3934	110.615		-6.97888	9.55157e-05	15.176	64.9243	0.000281631
E2F1	7.92963	5.47408	11.7412	6.13025	5.93845		37.6348	25.8044	19.5014	23.1915	20.4909	25.3545	74.2729		-6.22286	9.90471e-05	7.44272	32.3215	0.000288671
ECHS1	188.048	168.314	134.572	146.156	172.384		48.6127	73.2666	96.8188	70.2476	69.4829	34.7722	66.3423		6.78608	0.000109339	161.895	65.649	0.000295712
GNG12	107.649	122.237	119.631	125.958	121.426		79.8204	54.5284	60.0554	84.6333	75.0589	76.4326	83.9014		7.08836	0.000109713	119.38	73.4901	0.000302753
SRA1	130.375	179.509	149.634	181.354	216.385		58.1428	121.132	79.4232	79.698	71.7429	49.7828	59.141		6.13122	0.000111503	171.451	74.1518	0.000309794
NPY	288.184	0.733046	1.20433	58.5641	2.43057		1e-06	1e-06	0.55258	1e-06	1e-06	1e-06	1e-06		6.30796	0.000114621	70.2232	0.0789409	0.000316835
CNKSR3	16.9945	14.8779	15.4252	12.862	11.0919		106.492	115.577	61.6861	51.3545	37.4148	79.9465	29.7079		-7.12064	0.000123162	14.2503	68.8827	0.000323875
MCM6	53.5857	38.6086	55.7535	37.5447	35.5767		146.563	73.0083	70.7367	107.944	99.7635	116.198	108.699		-6.15034	0.000123725	44.2138	103.273	0.000330916
PDGFB	18.5652	13.4797	11.0566	16.0399	8.32817		27.4226	43.0771	32.3249	59.6413	37.1665	49.2444	65.68		-6.46307	0.00012607	13.4939	44.9367	0.000337957
LYPLAL1	39.9201	29.9189	39.7773	32.3691	62.596		12.4467	10.0301	13.3645	11.5566	14.7486	11.3565	22.838		6.658	0.000129125	40.9163	13.763	0.000344997
ALDH7A1	111.873	69.7558	99.1586	65.9118	111.405		24.4178	39.3745	34.3135	42.6485	38.1611	24.2843	37.655		6.76492	0.000132369	91.6208	34.4078	0.000352038
BFAR	54.6475	58.5739	51.9552	50.8018	44.6932		78.3256	85.384	68.9756	79.9056	62.0458	79.4128	80.2334		-6.22544	0.000136048	52.1343	76.3261	0.000359079
ARFIP2	63.1238	42.6981	61.1374	57.1977	62.0719		22.1005	20.5912	30.2925	30.9585	33.1096	22.052	40.1835		5.9701	0.000139848	57.2458	28.4697	0.00036612
WWOX	30.6006	44.584	36.3109	28.3737	52.8135		11.3917	19.4932	12.2937	15.7793	18.7585	10.9215	13.1256		6.65918	0.000140252	38.5365	14.5376	0.000373161
FAM114A2	13.1338	12.5382	13.2359	12.0791	12.1923		19.8797	16.4315	17.8668	21.9819	16.4586	18.4996	24.1948		-7.15891	0.000148582	12.6359	19.3304	0.000380201
NDUFA9	91.3045	95.1844	108.228	90.1444	107.285		71.4758	47.2404	64.4376	74.7716	71.8823	61.4698	62.98		6.00307	0.000150361	98.4293	64.8939	0.000387242
NGRN	83.4367	79.3586	73.3201	77.4587	88.8642		68.4212	57.3353	61.1328	57.5063	59.8915	60.0154	63.2552		6.87205	0.000153015	80.4877	61.0797	0.000394283
CD164L2	29.2214	39.0863	18.6398	46.2276	25.8912		6.0838	11.0891	6.71009	4.35928	5.86035	1.61072	1.75858		6.1387	0.000155141	31.8133	5.35313	0.000401324
ARF3	248.245	216.013	164.386	224.89	212.147		160.314	114.58	92.4586	91.4131	139.282	117.936	100.003		5.84613	0.000163895	213.136	116.57	0.000408364
C11orf58	13.641	11.9481	12.4066	14.5868	15.3339		8.06664	7.97771	8.77421	7.12836	9.75403	10.2975	10.5426		5.82172	0.000168895	13.5833	8.93444	0.000415405
ELL2	91.562	49.7894	34.1187	98.1482	59.1323		6.08621	13.1424	12.6528	15.742	14.4217	9.41085	14.8614		7.07207	0.000170449	66.5501	12.331	0.000422446
LAP3	106.856	93.5044	113.128	115.917	99.011		70.8113	80.0274	54.611	65.4961	65.6609	65.5968	88.3654		5.85227	0.000179406	105.683	70.0813	0.000429487
COG7	60.1273	53.4606	59.3243	62.3285	58.9892		50.3971	40.5907	47.3949	47.3739	37.0125	40.8048	38.2911		6.07702	0.000179875	58.846	43.1236	0.000436527
ETFA	115.182	130.779	131.957	117.716	151.949		87.7711	48.126	83.8307	68.7962	78.315	73.8184	86.9529		5.92603	0.000184727	129.517	75.3729	0.000443568
LIF	5.3786	6.44534	4.68571	9.85366	4.96465		13.5068	14.7119	12.7449	22.7943	41.0043	21.7552	30.5565		-5.74754	0.000185909	6.26559	22.4391	0.000450609
SDR9C7	0.168687	5.52356	2.90823	2.68109	1.70873		1e-06	1e-06	1e-06	0.181496	1e-06	1e-06	1e-06		6.87492	0.000186645	2.59806	0.0259289	0.00045765
CHPF2	72.4047	75.5741	73.4009	96.4527	64.4769		37.5758	29.2401	38.4735	35.8235	58.3547	51.0832	33.4045		5.7753	0.000187993	76.4619	40.565	0.000464691
CENPM	3.05183	2.27517	2.08996	1.53703	1.5578		9.19306	6.35219	5.8219	6.87354	4.88674	4.31812	16.8411		-5.75926	0.000188896	2.10236	7.75524	0.000471731
PLK4	4.51847	2.73069	5.99718	3.60042	2.56057		12.5746	6.60886	14.7932	18.2458	15.0757	11.6121	16.4267		-6.22139	0.00019943	3.88147	13.6196	0.000478772
RPS6KB2	18.1571	20.6293	20.8283	19.3819	27.2463		8.06525	8.22377	14.6077	13.3775	11.042	7.30883	11.9633		5.73407	0.000214186	21.2486	10.6555	0.000485813
COG8	76.6681	80.2125	82.0391	60.5819	74.654		49.0879	44.4148	44.9611	45.4247	53.5273	44.0114	60.8231		6.02043	0.000216421	74.8311	48.8929	0.000492854
UBL7	83.4862	75.4785	76.9871	116.947	123.414		63.7336	39.6309	37.7497	27.2068	38.8624	47.1276	36.1721		5.80445	0.000228878	95.2626	41.4976	0.000499894
ABCC12	1.04982	1.82762	0.688944	4.29078	1.11408		1e-06	1e-06	0.118901	1e-06	1e-06	1e-06	1e-06		7.36812	0.000233636	1.79425	0.0169867	0.000506935
VPS11	56.686	52.8068	64.5296	52.7982	44.1717		29.2956	31.1576	39.8917	27.731	35.2309	29.9238	40.7147		5.75383	0.000236714	54.1985	33.4208	0.000513976
CDC45	2.6701	2.07257	2.04031	2.13886	2.11556		5.78017	7.1589	8.01667	14.6999	4.55223	4.24805	9.64182		-6.81555	0.000242514	2.20748	7.72825	0.000521017
SAV1	32.5701	30.2292	24.6237	22.1414	23.6202		54.8563	38.5932	47.6934	50.1826	40.5002	62.9542	40.5075		-5.77508	0.000243118	26.6369	47.8982	0.000528058
TMEM9B	108.023	114.44	122.191	140.361	125.956		74.072	75.3727	75.8338	82.4864	84.6136	82.0591	111.328		5.55509	0.000243176	122.194	83.6808	0.000535098
NUP88	61.6619	55.5957	67.5012	46.5636	62.6098		34.6285	27.9824	33.9025	34.9108	43.696	33.657	41.2217		5.89925	0.000243226	58.7864	35.7141	0.000542139
C13orf27	8.46755	9.57905	8.33593	7.56897	5.46101		25.1959	11.3015	23.6739	25.7125	13.7954	19.3464	33.7446		-5.6418	0.000248209	7.8825	21.8243	0.00054918
KLHL36	42.7557	45.63	46.4704	41.3017	45.6586		19.9855	24.7466	30.7688	23.4626	34.0058	23.488	31.3303		6.74736	0.000249509	44.3633	26.8268	0.000556221
KIAA1609	8.95986	10.1588	11.0871	11.8088	11.3403		3.7493	5.26711	6.9405	6.40897	4.54662	2.74476	4.67587		6.28411	0.000255557	10.671	4.90473	0.000563261
DSCC1	5.56746	4.58304	6.16122	2.43747	5.20326		16.614	13.4665	15	43.694	10.8651	15.2889	36.2548		-5.5145	0.000256638	4.79049	21.5976	0.000570302
ALDH1B1	2.91994	0.631562	20.3048	0.283531	1.11042		1e-06	1e-06	0.378388	1e-06	1e-06	1e-06	1e-06		6.31096	0.000258616	5.05005	0.0540563	0.000577343
PIP5K1B	54.7171	46.831	13.0409	67.6921	63.6784		1.70745	4.61364	11.6926	8.99647	1.79961	1.40779	0.777591		5.51018	0.000258951	49.1919	4.42788	0.000584384
DDX49	19.8682	21.5701	21.2748	19.7833	22.4706		29.3082	29.762	29.7079	36.1974	24.1821	26.4752	27.2458		-5.90863	0.000259255	20.9934	28.9827	0.000591424
PPAP2B	68.804	98.44	68.2747	111.049	86.2776		51.3582	42.7786	28.4629	29.0742	42.9824	51.0796	40.895		5.67874	0.000260649	86.5691	40.9473	0.000598465
TPRG1L	223.982	185.075	225.779	154.857	187.334		87.262	87.3515	112.785	121.923	158.2	89.8169	106.932		5.48854	0.000267313	195.405	109.181	0.000605506
DCK	4.70376	2.67283	9.40617	1.7296	3.5398		32.813	51.3789	9.22929	60.7527	22.4715	33.1481	53.3686		-5.7394	0.00028738	4.41043	37.5946	0.000612547
RNF114	44.67	42.9248	48.7923	41.939	42.5619		88.9365	84.4283	80.4319	51.5253	66.4976	73.5535	97.1331		-6.44844	0.000289315	44.1776	77.5009	0.000619587
SKA2	18.388	23.0811	18.8058	12.9585	21.7863		42.1582	25.1367	43.1986	37.535	40.3444	48.6057	63.7571		-5.48318	0.000289773	19.0039	42.9622	0.000626628
UBE2C	8.79946	9.23686	14.3735	10.1139	15.8305		32.5465	40.5747	28.5577	34.4253	27.9549	26.8018	25.5142		-7.35338	0.000293456	11.6708	30.9107	0.000633669
HMGB2	73.4966	84.5138	84.1186	67.6004	58.5925		155.74	167.896	174.89	145.025	97.8516	109.258	227.458		-5.53364	0.000298666	73.6644	154.017	0.00064071
KCTD14	27.7367	22.2311	20.335	17.3902	13.9059		2.92327	2.70854	7.91365	7.65734	9.08719	3.89278	8.10539		5.61944	0.000303078	20.3198	6.04117	0.00064775
C2orf56	7.64413	8.60978	9.26386	6.89043	6.53012		14.2068	12.3559	14.3109	19.5415	10.1622	15.571	22.734		-5.50759	0.000306553	7.78766	15.5546	0.000654791
MEF2A	35.3194	29.7417	35.1723	25.3493	31.8183		17.5664	16.0556	14.8962	20.5676	24.639	18.514	22.652		5.39299	0.000312732	31.4802	19.2701	0.000661832
FAM116B	16.1052	12.7302	13.5149	10.4604	14.4582		6.19519	6.73659	10.6786	5.0477	6.61104	3.82333	6.18041		5.54284	0.000313037	13.4538	6.46755	0.000668873
PDILT	1.58304	0.132454	0.0772257	1.00756	1.56856		1e-06	1e-06	1e-06	0.160125	1e-06	1e-06	1e-06		6.2129	0.000315026	0.873768	0.0228759	0.000675914
MAEA	77.9872	76.634	75.0675	71.972	79.9111		47.0112	42.3238	54.6285	40.7994	62.5276	45.9541	58.7555		6.59912	0.000315511	76.3144	50.2857	0.000682954
ITM2B	1907.62	1768.59	1595.47	1747.98	1972.83		1264.95	899.894	813.949	960.341	1495.11	1150.85	912.899		5.94613	0.000315709	1798.5	1071.14	0.000689995
CDKN2AIP	50.4529	49.1371	45.7637	44.8218	41.9326		34.0917	34.4252	31.6865	24.7733	37.1791	32.0704	24.1039		5.70156	0.00032586	46.4216	31.19	0.000697036
PER1	60.9798	72.7272	79.6223	57.2013	117.142		19.2436	45.4356	24.838	25.8531	32.7154	16.1699	38.1443		5.3719	0.000326085	77.5345	28.9143	0.000704077
HMGCL	90.684	84.3305	95.464	79.1444	116.456		36.3873	72.8909	49.5591	33.0891	47.3387	29.3896	50.1293		5.58909	0.000329838	93.2158	45.5406	0.000711117
GRIA3	10.7644	6.21061	4.06028	2.35592	6.87326		1.14285	0.950558	1.22181	1.12314	0.283697	1.08298	0.262648		5.42704	0.000331346	6.05289	0.866812	0.000718158
LONP2	166.774	140.215	107.291	88.114	104.134		38.0322	86.2611	43.3784	42.0523	64.3809	30.5789	34.7621		5.32004	0.000337841	121.306	48.4923	0.000725199
THTPA	97.119	89.9759	82.2766	76.4474	80.2807		52.4679	59.9593	51.6628	57.0316	66.2551	49.2353	35.2514		5.57243	0.00033956	85.2199	53.1233	0.00073224
CDC6	7.4642	4.30556	7.12328	3.60053	3.18212		15.165	16.693	13.3539	33.9954	15.424	11.3207	38.3744		-5.39751	0.000340617	5.13514	20.6181	0.00073928
LRP2	2.55703	3.16144	6.3547	2.00189	51.1957		0.0246168	0.0155656	0.531923	0.15768	0.285909	0.0427225	0.0164694		5.5024	0.000342925	13.0542	0.153555	0.000746321
PGAP2	65.1581	73.3471	70.2549	87.9912	72.514		45.3112	38.5645	31.2495	33.087	62.0112	36.4215	48.7059		5.59981	0.000346983	73.8531	42.193	0.000753362
LDLR	12.872	25.7954	18.8894	15.4664	16.5071		78.7237	119.748	43.5403	26.4473	137.159	101.167	134.458		-5.74539	0.000347719	17.9061	91.6062	0.000760403
RNF141	43.6678	33.9664	36.5939	31.1817	36.1548		23.1449	20.0434	17.9766	20.1618	24.5933	25.2931	30.4263		5.29143	0.000352088	36.3129	23.0913	0.000767443
REPS2	6.90603	4.00338	3.88698	5.29644	3.65991		1.56585	2.98733	2.06795	2.70921	1.38718	1.38801	1.45323		5.32955	0.000367004	4.75055	1.93697	0.000774484
NRARP	60.0962	54.0586	32.0525	30.5157	38.2439		183.966	101.728	100.013	353.555	75.7268	216.099	164.462		-5.31445	0.00037487	42.9934	170.793	0.000781525
TMEM159	21.9484	22.6392	23.6684	15.2008	18.7504		49.0509	74.7492	65.7802	32.3026	47.8679	31.5898	35.4516		-5.35471	0.000389572	20.4414	48.1132	0.000788566
DPAGT1	57.1764	53.2552	56.8522	52.5263	42.6544		24.3212	30.4074	32.1056	40.8711	32.3805	31.5214	42.1094		5.23019	0.000390904	52.4929	33.3881	0.000795607
C5orf32	137.195	196.78	206.089	249.323	188.4		53.8093	152.203	57.8569	38.8767	86.1601	50.0391	75.0755		5.41851	0.000405681	195.557	73.4315	0.000802647
NSDHL	19.5286	12.9977	18.7689	12.1411	13.5079		25.1631	43.795	29.199	31.2076	35.4123	27.6971	26.7966		-5.8354	0.000411008	15.3888	31.3244	0.000809688
ACO1	58.7291	52.2484	53.5284	45.3423	44.8101		18.9394	42.7348	24.3409	33.4177	28.6681	24.4118	24.8301		5.51913	0.000413142	50.9317	28.1918	0.000816729
CABLES2	9.43729	10.1728	10.0851	8.2787	7.6559		18.3955	18.0897	31.6832	20.2034	11.0894	17.6619	18.7741		-5.60602	0.000415176	9.12596	19.4139	0.00082377
RRM2	23.7528	17.669	37.932	21.2262	16.3589		72.3328	69.6453	35.9269	51.0748	84.8993	60.8843	109.062		-5.37402	0.000416843	23.3878	69.1179	0.00083081
FAM83D	7.22503	8.24089	8.47986	3.14864	5.62284		24.8464	21.9721	42.095	26.9398	17.4416	16.8898	23.3367		-6.21914	0.000416889	6.54345	24.7888	0.000837851
ACTR3B	13.2603	12.5984	14.6296	11.1519	16.8002		9.00834	8.63138	9.21918	7.56363	9.00205	8.81559	5.96263		5.47587	0.000418106	13.6881	8.31469	0.000844892
CDKN2D	10.3409	18.1883	13.8667	17.1324	12.9032		29.9073	40.3892	22.0463	27.7074	31.4159	28.6479	30.6665		-6.03572	0.000425777	14.4863	30.1115	0.000851933
EXOSC10	41.9014	39.5151	43.4752	45.6656	49.2274		32.6253	34.8349	27.9819	21.8046	33.1249	28.8258	32.9928		5.29881	0.000432377	43.9569	30.3129	0.000858974
FITM2	19.9274	14.8835	19.2852	13.7036	9.91757		41.4104	29.1611	49.043	49.4787	23.0736	42.6418	35.4996		-5.47906	0.00043497	15.5435	38.6155	0.000866014
VAMP3	55.6375	61.773	58.136	55.3977	57.8922		44.4988	38.0598	37.1359	36.1628	50.0782	43.1719	48.7077		5.84167	0.000439705	57.7673	42.545	0.000873055
RAI14	13.7692	21.839	17.9544	22.4448	12.5673		34.1735	39.9133	26.3624	44.0679	36.4733	52.8817	51.9548		-5.57897	0.000446083	17.7149	40.8324	0.000880096
TMEM185B	89.1343	87.5352	101.713	80.131	91.011		169.626	123.263	110.355	149.243	108.621	149.507	127.168		-5.25064	0.000471833	89.9049	133.969	0.000887137
MLYCD	70.7347	60.9029	64.5362	64.1084	69.3226		26.015	30.8284	44.0636	43.41	35.0824	27.1146	49.4524		6.16856	0.000472794	65.921	36.5666	0.000894177
USP2	12.3988	12.1751	10.6744	17.943	26.3459		6.36344	2.44116	5.4114	5.44119	4.71378	6.03647	1.79122		5.09894	0.000473474	15.9074	4.59981	0.000901218
WDR78	4.71539	6.37674	6.31397	6.21723	6.79902		3.27057	2.4922	3.06394	2.38383	5.23901	1.8425	2.56482		5.42206	0.000477344	6.08447	2.97955	0.000908259
DDX28	28.6961	31.9103	27.9063	26.1231	30.807		17.8947	22.6793	23.9039	23.8854	23.4118	18.2508	18.4749		5.10897	0.000497194	29.0886	21.2144	0.0009153
FOXA1	130.994	105.434	11.4574	117.011	70.8645		5.84886	1.7598	7.79157	1.81167	6.01962	3.21514	0.268798		5.16856	0.00050057	87.1522	3.81649	0.00092234
HMMR	3.38705	2.36979	3.1289	2.39411	1.69817		5.67835	4.10933	4.81931	7.6346	5.87942	5.43513	9.44783		-5.30981	0.000503245	2.5956	6.14342	0.000929381
MXD4	85.7788	55.3802	76.9192	44.9948	73.864		31.7516	26.9584	38.2925	15.1085	26.5166	37.675	25.1259		5.12652	0.000505188	67.3874	28.7755	0.000936422
OSCP1	57.0645	40.6405	38.6424	31.4249	34.8375		22.1361	16.3705	22.4307	18.6832	29.2258	15.8381	14.8175		5.23915	0.00051017	40.522	19.9288	0.000943463
NUCB2	141.866	151.363	139.928	239.475	163.54		88.1098	52.0552	75.6033	57.6529	91.2085	83.4821	119.039		5.06369	0.000514357	167.234	81.0215	0.000950503
STAC2	79.928	107.016	246.736	60.5784	206.033		3.1348	37.7361	14.2494	23.789	2.51769	1.71444	1.61843		5.29457	0.000520532	140.058	12.1085	0.000957544
SIK2	31.257	19.1964	24.4814	24.7158	19.7882		11.2572	10.8252	11.2702	11.4408	14.9632	14.3577	13.1967		6.32671	0.000529394	23.8878	12.473	0.000964585
RHBDL1	23.8836	18.4888	24.4349	14.6747	24.521		6.96417	6.51416	14.1938	5.22936	10.0288	5.75032	13.0684		5.0762	0.000531591	21.2006	8.82129	0.000971626
MED8	25.4926	30.3648	28.5042	23.7301	32.0901		14.2573	18.9422	21.8165	14.2184	14.0936	9.81564	17.8693		5.22693	0.000537142	28.0364	15.859	0.000978666
SSBP2	36.7455	41.8948	22.2036	33.2897	33.7294		19.2795	19.8534	17.2699	18.4491	15.1408	10.1766	11.8099		5.1712	0.000540365	33.5726	15.997	0.000985707
RAD51AP1	3.22268	2.67835	3.68382	3.09524	3.19919		9.85064	5.35089	4.08356	8.80219	7.42233	5.19837	6.244		-5.5247	0.000552977	3.17586	6.70743	0.000992748
TMEM45A	205.768	162.4	79.4041	265.518	201.453		12.7602	28.9266	45.0658	25.2646	25.5632	11.187	1.81001		5.30437	0.000556816	182.909	21.5111	0.000999789
MCM2	19.2027	10.4393	18.3291	8.88745	8.61191		61.1843	39.1117	36.6232	52.5918	33.7839	52.5474	52.1826		-6.73933	0.000559634	13.0941	46.8607	0.00100683
UBE2S	60.2502	61.6175	83.5329	46.5226	64.5619		98.9509	145.367	119.883	246.741	138.04	91.0597	153.741		-4.98452	0.000561538	63.297	141.969	0.00101387
INO80B	34.2146	42.0679	34.082	37.7077	51.2216		17.4196	29.8119	31.4621	19.0268	21.6031	17.781	18.9504		4.96319	0.000567372	39.8588	22.2936	0.00102091
DTL	5.3418	3.7151	6.36206	2.69696	3.17908		9.43442	11.6998	12.6607	26.3592	10.8714	7.33308	20.7508		-5.00653	0.000570031	4.259	14.1585	0.00102795
RNF128	65.7892	19.0274	23.602	64.8353	23.2184		10.4897	7.20714	5.30172	9.91615	2.06094	3.71539	1.31812		4.98077	0.000571495	39.2945	5.71559	0.00103499
KIAA1949	51.9707	57.8084	46.7987	55.6123	50.8422		64.8193	74.9228	81.3656	58.895	72.4016	72.6096	62.9646		-4.96097	0.000574209	52.6065	69.7112	0.00104203
UNC13C	3.34146	0.809855	3.97707	3.38196	0.420762		0.0222183	0.219753	0.166986	0.177415	0.0737111	0.0191882	0.0737232		5.29108	0.000579948	2.38622	0.107571	0.00104907
NLRX1	35.4112	32.7833	32.3746	21.5729	25.0509		11.9761	13.212	12.2776	13.8867	25.1586	16.3627	13.5062		5.00476	0.000580777	29.4386	15.1971	0.00105612
EFNB2	16.1504	26.7702	23.1157	18.6417	17.4486		63.5678	26.0909	35.587	77.3684	85.7399	75.8791	48.1796		-5.17255	0.000590157	20.4253	58.9161	0.00106316
SKA3	5.25162	5.39932	5.48649	3.30995	3.17198		10.0722	7.5756	9.51419	11.7788	10.5212	7.87822	17.1035		-5.25561	0.000592206	4.52387	10.6348	0.0010702
KIAA0319L	56.9418	38.8666	63.3844	49.6018	52.9144		25.5042	26.6574	31.301	25.0077	31.4117	30.0661	38.0612		5.66867	0.000592825	52.3418	29.7156	0.00107724
TPX2	14.6137	9.93498	15.6083	7.78254	6.71056		39.3862	25.8025	26.2931	33.5325	35.7443	37.1337	50.4565		-6.39718	0.000594509	10.93	35.4784	0.00108428
ASAP1	11.2709	15.5128	12.1967	14.583	12.5192		24.494	24.0066	14.6577	23.2274	33.4618	36.3669	28.7284		-5.2134	0.000605654	13.2165	26.4204	0.00109132
MCM3	24.6052	16.9922	21.1856	12.3322	12.5234		56.2587	62.9017	39.251	67.5525	36.7271	45.499	23.4463		-4.99354	0.000608563	17.5277	47.3766	0.00109836
HMGCS1	51.2334	31.7746	68.991	34.5176	27.8821		98.1017	87.6737	88.8003	139.568	159.962	134.554	221.141		-5.36702	0.000608826	42.8797	132.829	0.0011054
KBTBD2	46.482	34.7593	45.7126	32.5164	30.998		66.0505	57.8556	63.4854	68.6189	55.6039	68.8564	97.6099		-5.28151	0.000609446	38.0937	68.2972	0.00111244
MPHOSPH6	21.9754	18	18.8454	26.5497	27.0401		12.8171	9.63725	11.0841	16.4649	15.927	11.4864	11.1979		5.11966	0.000614516	22.4821	12.6592	0.00111948
TBC1D16	7.25485	5.91435	8.74916	6.01744	10.5558		0.69544	0.544318	5.47282	0.650283	0.586391	0.618961	0.174644		5.8881	0.000619629	7.69832	1.24898	0.00112652
NOD2	11.9049	5.16014	12.0024	12.7892	17.0271		2.02437	5.12707	2.09588	3.30592	5.38956	2.03246	1.59746		5.0633	0.000625373	11.7767	3.08182	0.00113356
LACTB	26.4343	32.0528	37.0639	31.8109	35.0757		20.6473	21.0985	19.7611	23.1013	23.6678	24.1658	19.4254		6.01783	0.000641036	32.4875	21.6953	0.0011406
B3GALT4	20.7278	16.9761	18.202	19.4786	21.4615		12.811	10.5006	13.0068	7.13413	14.1466	12.3104	12.8425		5.24257	0.000650532	19.3692	11.8217	0.00114765
FUZ	22.6777	20.0569	20.935	16.3381	22.5373		13.9049	12.0925	14.4068	12.436	15.6767	8.31129	9.26681		4.93206	0.000651757	20.509	12.2993	0.00115469
NOC2L	62.4237	59.3618	62.4997	49.9954	54.7934		28.8907	33.8642	40.374	43.3904	41.6948	29.4723	48.0512		5.02588	0.000690184	57.8148	37.9625	0.00116173
SLC44A2	110.587	112.306	83.5977	107.876	129.982		205.028	157.874	224.592	138.426	147.414	182.485	188.007		-4.96197	0.000698512	108.87	177.689	0.00116877
IL17RD	2.92133	1.84445	2.60789	2.93537	1.21988		4.51023	5.07157	6.56749	13.4446	5.192	6.36892	11.9901		-4.93405	0.000700502	2.30578	7.59213	0.00117581
C20orf94	6.25331	4.04767	6.05068	4.74245	4.54248		8.68488	8.28215	10.5803	7.12277	7.65474	10.6608	15.3771		-4.8163	0.000709482	5.12732	9.76611	0.00118285
AMBRA1	42.8606	26.8255	30.2901	25.7639	33.357		13.9531	19.0091	13.7481	13.9841	20.0359	17.2684	23.5845		5.01405	0.000726245	31.8194	17.369	0.00118989
IGHMBP2	32.522	21.8957	24.4647	19.4956	21.1825		10.264	12.6376	12.6351	13.2666	13.7049	11.4578	19.0206		5.12454	0.000726485	23.9121	13.2838	0.00119693
TMEM79	61.7697	47.1015	61.0328	61.5875	47.0539		22.1506	54.4953	15.2274	21.6807	19.5103	16.9271	19.6023		5.34342	0.000729158	55.7091	24.2277	0.00120397
HINT2	67.4173	56.2404	43.0619	43.1235	84.8314		19.0032	40.5541	18.6645	14.6163	33.3281	17.5432	10.971		4.80231	0.000730558	58.9349	22.0972	0.00121101
MELK	4.64126	4.36922	7.13517	3.66142	4.83218		10.4656	11.3516	7.34936	8.76093	10.7986	7.7491	16.1378		-4.9432	0.000737486	4.92785	10.3733	0.00121805
CYB561	273.858	218.721	218.53	337.694	265.466		186.928	167.239	101.796	136.727	114.543	174.36	164.26		4.81873	0.000738997	262.854	149.408	0.00122509
DAPK3	48.0965	46.4132	45.7642	48.5949	58.1481		76.6604	57.2378	98.7938	64.2411	67.1827	91.1043	86.9635		-4.98358	0.000739014	49.4034	77.4548	0.00123213
PNPLA8	102.961	88.5798	96.2142	140.468	109.099		36.338	51.4244	49.654	75.7264	63.7113	40.6897	79.4905		4.83075	0.000739351	107.464	56.7192	0.00123917
TMEM59	391.362	411.827	304.145	592.741	382.088		180.284	201.253	161.919	146.874	258.904	159.643	308.069		4.89142	0.000745593	416.433	202.421	0.00124622
SLC26A4	52.6522	82.7132	452.543	231.892	19.0565		1.66062	5.62087	9.34054	4.93835	1.98208	1.22822	0.545499		5.47533	0.000757338	167.771	3.6166	0.00125326
ACPP	38.3845	23.5388	36.7196	16.4874	65.112		4.20337	8.08121	6.86557	16.6459	7.84114	3.25116	1.5422		4.76834	0.000759221	36.0485	6.91865	0.0012603
RANBP17	4.72712	4.96194	6.75381	5.61088	5.2379		10.321	10.8256	6.18443	9.18395	7.30823	12.4817	11.4407		-4.85009	0.000762672	5.45833	9.67794	0.00126734
USP5	58.9154	47.7621	57.2533	47.6577	50.587		43.6595	29.6286	35.1783	34.7237	42.2246	42.1927	37.379		4.76441	0.000767302	52.4351	37.8552	0.00127438
PQLC1	36.235	38.2505	34.4959	27.4329	36.3431		69.9158	69.3457	38.4593	45.219	60.2907	64.6574	55.913		-4.81054	0.000770548	34.5515	57.6858	0.00128142
GPR19	4.13694	2.81755	5.18118	2.50031	3.48864		11.8709	5.01258	10.2464	11.2912	5.56832	8.50412	10.1441		-4.82232	0.000787205	3.62492	8.94823	0.00128846
DHRS3	160.511	113.84	175.397	257.548	146.26		52.4156	142.186	32.0111	75.8311	41.8849	44.0123	48.612		4.76634	0.000792079	170.711	62.4219	0.0012955
EBNA1BP2	132.842	129.466	103.176	102.97	168.508		73.6774	45.8238	54.9517	66.1467	109.94	60.0308	47.3328		4.73288	0.000800861	127.392	65.4147	0.00130254
PTPRA	59.8501	56.9062	62.6374	54.2827	63.7		104.982	80.6434	101.884	82.9787	65.9521	102.372	76.4244		-5.175	0.000805792	59.4753	87.8909	0.00130958
REEP5	300.553	306.354	338.173	263.545	303.32		245.696	163.14	195.176	178.049	235.999	241.385	232.925		4.82459	0.000807955	302.389	213.196	0.00131662
CHD3	119.742	88.4092	99.9905	141.544	82.2521		48.4567	36.5362	65.7742	45.1093	80.0194	57.0293	52.0509		4.81262	0.000822811	106.388	54.9966	0.00132366
FBXO2	16.1845	21.3144	11.4577	11.6896	105.771		0.250301	5.92339	0.875461	2.39381	3.96459	0.349662	0.814473		4.73132	0.000825983	33.2834	2.08167	0.0013307
UCK1	37.0554	35.9203	29.2834	28.1767	40.8405		70.4004	55.8051	58.9735	48.1983	40.6294	55.2177	54.8069		-4.88377	0.00083163	34.2553	54.8616	0.00133775
CLSTN2	16.6447	73.1971	12.5012	16.5665	9.98916		3.58528	2.71672	2.68388	0.726065	1.35807	5.80744	0.741918		4.92948	0.000845661	25.7797	2.51705	0.00134479
POT1	16.5552	16.3159	14.9463	14.1344	11.3696		20.387	23.5543	23.1384	25.4347	17.3109	22.228	30.4043		-4.78986	0.000846474	14.6643	23.2082	0.00135183
ADRBK2	32.1021	18.6656	35.0199	45.4118	15.6736		6.6569	13.2119	7.36594	4.14087	4.90165	7.18237	13.3359		4.95324	0.000848864	29.3746	8.11365	0.00135887
ZNF259	24.6214	26.9496	28.2994	26.0637	23.1243		13.5194	16.3462	20.0093	17.2372	23.4819	13.7205	16.631		5.0621	0.000851585	25.8117	17.2779	0.00136591
SLC4A11	3.78433	4.84921	7.69692	4.43604	4.8291		15.1496	15.0294	15.2672	6.73141	9.41662	16.4879	32.5062		-4.78098	0.000856722	5.11912	15.7983	0.00137295
RBL1	11.0723	9.39486	13.2147	10.0421	6.35626		26.3909	20.1349	20.0669	25.5796	16.8697	26.5693	17.6403		-5.60909	0.000879906	10.016	21.8931	0.00137999
VCP	349.111	301.949	362.991	377.754	341.657		223.693	296.894	168.388	223.937	285.171	234.366	202.858		4.93748	0.000888847	346.692	233.615	0.00138703
RPL27A	5.16772	4.64438	5.28979	3.2395	5.87026		3.37684	2.11363	2.76293	2.01791	2.01257	2.63737	2.63491		5.19161	0.000908146	4.84233	2.50802	0.00139407
TMCO4	16.1435	15.7909	21.5245	25.6098	28.7429		6.84961	12.5995	10.8399	8.49846	9.60936	4.61906	12.8927		4.65052	0.000916521	21.5623	9.41551	0.00140111
HSDL2	52.1765	48.2758	42.2601	48.0575	51.3993		30.2425	44.8757	27.4923	34.0287	30.6631	28.219	21.7005		5.06842	0.000919349	48.4338	31.0317	0.00140815
QDPR	48.2279	48.8428	51.134	55.9063	45.5079		17.6086	31.02	33.7686	23.1566	33.1774	16.3671	31.1543		5.47824	0.000923147	49.9238	26.6075	0.00141519
ECT2	8.08722	7.06964	13.6985	4.29145	4.52294		23.987	18.6986	15.6721	33.6614	26.9817	24.9633	55.1051		-5.12409	0.000940542	7.53395	28.4385	0.00142223
GLA	26.6128	28.8167	22.6573	32.3801	26.8579		24.7825	18.5122	17.8989	16.8014	17.6884	17.4216	12.7515		4.62713	0.000942231	27.465	17.9795	0.00142928
ENPP3	0.758261	8.04706	4.97243	10.821	6.01126		0.223627	0.526666	0.479135	0.0575942	0.293361	0.42911	0.0936538		5.22422	0.000945285	6.122	0.30045	0.00143632
SPRY1	79.4476	96.6606	110.505	78.0953	124.917		312.791	123.409	219.54	203.499	234.743	288.205	133.405		-4.6646	0.000958748	97.9251	216.513	0.00144336
HSD11B1	37.8999	61.1649	29.8138	80.2053	136.32		11.6367	10.8187	12.1074	7.20022	23.1294	9.85596	5.84023		5.47162	0.00097645	69.0808	11.5127	0.0014504
MRI1	37.9517	69.4047	75.4889	73.0032	79.2557		20.6445	36.1465	28.6174	42.9705	32.1549	18.1231	18.5888		4.7103	0.00098036	67.0208	28.178	0.00145744
C15orf23	3.5129	4.71231	6.08662	2.97236	3.82014		17.3299	6.35549	6.68276	8.62266	11.0558	8.4715	11.1038		-4.63479	0.000987128	4.22087	9.94599	0.00146448
HEATR4	1.22261	1.11086	1.85226	1.45185	2.35253		0.575494	0.402913	0.760634	0.577343	0.210795	0.399699	0.102282		4.84598	0.000990227	1.59802	0.432737	0.00147152
LRRC42	50.1898	47.9734	30.5227	42.2598	38.5547		23.4765	23.5649	22.0824	22.1842	36.7841	20.355	17.6645		4.68178	0.00100387	41.9001	23.7302	0.00147856
ATG10	17.0289	14.1785	16.4603	15.0012	12.6239		2.22836	8.0262	5.62159	3.83482	8.74966	2.64554	6.24565		5.4799	0.00100746	15.0586	5.33597	0.0014856
CMTM8	47.3073	43.0852	35.7956	100.755	77.5113		6.8902	26.6137	9.22839	22.6595	24.1878	3.9234	8.48649		4.61861	0.00101365	60.8909	14.5699	0.00149264
COBLL1	112.318	76.4017	123.844	87.363	68.8207		29.6743	34.3841	27.7518	42.6961	72.7226	29.9945	60.3262		4.57956	0.0010162	93.7495	42.5071	0.00149968
FHL2	63.7919	56.9454	38.843	61.6219	46.556		284.412	87.6612	86.5514	111.166	168.504	255.266	296.714		-4.97067	0.00101902	53.5516	184.325	0.00150672
MYO1B	59.1462	50.1958	41.7593	77.2029	41.2858		14.4352	20.2853	23.9734	14.7126	48.5716	22.8681	14.8766		4.59397	0.00102656	53.918	22.8175	0.00151377
CHRM1	26.9425	19.2682	49.6923	25.2725	102.407		10.9857	0.934039	18.2957	2.29325	0.921665	3.86953	1.12565		4.64044	0.00102691	44.7165	5.48936	0.00152081
MXD3	4.9119	4.73456	6.79888	2.73799	3.99608		14.0852	12.3443	16.265	11.6212	9.03911	6.08696	13.026		-4.83287	0.00102778	4.63588	11.7811	0.00152785
POU4F1	1e-06	1e-06	1e-06	1e-06	1e-06		0.468902	1e-06	0.362961	0.146182	0.283777	1.48332	1.05827		-5.92624	0.00102911	1e-06	0.543345	0.00153489
FAM83F	20.0679	22.0264	40.7975	42.892	44.3676		10.5326	26.1347	6.22366	9.05139	8.30449	9.88913	10.2021		4.66641	0.00103211	34.0303	11.4769	0.00154193
ATAD2	18.0075	13.951	22.2183	9.51751	6.63233		64.4631	42.5323	32.7614	132.399	27.5798	59.9013	193.296		-4.5591	0.00104415	14.0653	78.9904	0.00154897
CENPA	4.08813	3.60296	7.6795	3.72724	4.58103		8.99709	10.4316	11.9344	16.2581	9.38218	6.55775	17.5586		-4.6708	0.00104911	4.73577	11.5885	0.00155601
CKAP2L	6.42473	5.35076	12.4311	4.97319	4.66014		17.9795	17.0665	13.6096	32.1259	16.627	15.4382	27.5518		-5.18392	0.00106912	6.76798	20.0569	0.00156305
PPME1	21.2738	21.2118	22.8654	27.0557	23.9835		11.8729	13.2496	18.6271	15.1158	21.2389	15.4424	13.7347		4.67423	0.00108356	23.278	15.6116	0.00157009
SLC26A7	34.2786	11.1997	43.0914	4.35372	13.0851		0.770158	8.6038	2.70258	0.444426	0.736137	0.474345	0.362803		4.56993	0.00108517	21.2017	2.01346	0.00157713
CDCA2	2.86005	2.49748	5.44459	2.85459	1.3605		10.8234	6.36217	7.73003	17.922	8.19185	10.3818	19.1169		-5.01593	0.00111541	3.00344	11.504	0.00158417
MAP2K1	57.3895	65.4738	57.8393	59.8891	61.521		45.6474	48.2655	37.0478	48.861	56.9055	43.2754	46.7797		4.82664	0.00112045	60.4225	46.6832	0.00159121
TMEM134	28.6048	37.4499	30.5527	24.8498	38.2685		11.0113	23.4883	13.8168	14.9621	26.176	11.7695	15.9244		4.57534	0.00112488	31.9451	16.7355	0.00159825
C12orf26	11.1404	10.2831	8.6648	9.50973	7.52244		4.96575	4.8223	7.97244	4.85986	4.75121	5.73211	7.70882		4.50726	0.00113226	9.42409	5.83036	0.0016053
LRRC41	118.051	102.513	158.114	120.85	94.2999		61.4573	60.6835	67.1658	74.5378	80.4777	53.157	83.6084		5.01945	0.00114707	118.766	68.7268	0.00161233
SSSCA1	65.9301	71.0523	61.8959	63.1646	110.052		27.7833	41.1089	40.351	26.8987	50.1386	25.6349	50.2272		4.53329	0.00116023	74.419	37.4489	0.00161938
ANLN	7.75733	9.15328	18.5481	9.19389	3.86177		40.0081	29.5627	27.7451	60.3206	52.5991	39.9472	65.4456		-5.74575	0.00117321	9.70287	45.0898	0.00162642
LCORL	18.762	14.2163	14.4934	19.6921	13.5637		7.39944	10.1619	11.2804	9.37233	13.2342	8.26242	9.96944		4.59458	0.00118256	16.1455	9.9543	0.00163346
SPAG7	79.868	79.889	62.1895	62.0459	96.0731		45.975	41.9792	56.9224	36.678	56.1925	32.6889	45.3893		4.60401	0.00119168	76.0131	45.1179	0.0016405
IDUA	79.7382	54.4162	61.9759	69.5041	69.5171		19.9357	16.4576	29.2142	9.47787	34.5858	25.3185	44.8215		5.14113	0.00120579	67.0303	25.6873	0.00164754
DCLRE1B	25.577	24.3381	33.8425	19.0407	17.7887		54.7659	41.6259	44.0887	70.3058	32.6293	40.3757	77.4426		-4.50859	0.00121071	24.1174	51.6048	0.00165458
UNC45A	69.3007	66.2282	89.8308	58.7934	75.8357		35.6631	47.3442	41.424	44.5104	61.0782	39.7615	53.0433		4.55151	0.00121266	71.9978	46.1178	0.00166162
CHAF1A	11.4718	8.74577	15.5035	7.59274	8.21574		24.1662	23.1851	17.6208	34.137	18.7706	20.8516	20.1875		-5.18415	0.00122694	10.3059	22.7027	0.00166866
SEC14L1	120.768	125.421	239.524	166.396	115.831		79.6433	57.082	56.0413	95.8833	53.6773	79.4149	43.6047		4.81028	0.00123707	153.588	66.4781	0.0016757
ACD	10.8174	13.4828	11.1637	9.30083	11.1076		6.42759	8.60379	8.1929	6.56103	8.31118	4.30332	6.04509		4.52759	0.00123914	11.1745	6.9207	0.00168274
TMEM97	38.3453	26.3741	40.1738	30.1243	36.4323		50.6204	103.882	59.3429	102.69	57.1992	50.8156	125.962		-4.65088	0.00124301	34.29	78.6446	0.00168978
TONSL	2.94998	1.94753	3.56415	1.18309	1.61936		6.87683	7.43655	7.54747	20.6342	3.18073	5.99366	11.5428		-4.46637	0.00124423	2.25282	9.03032	0.00169682
SLC31A1	66.0862	54.349	79.2842	107.976	144.558		19.4252	48.1679	20.0721	28.3315	29.5557	27.4272	45.6654		4.79882	0.00124916	90.4507	31.235	0.00170386
MTBP	4.69603	5.53686	5.99039	3.13474	3.79358		12.3017	8.91526	12.2775	23.2044	5.32696	11.622	11.4939		-4.4599	0.00125774	4.63032	12.1631	0.00171091
MED17	45.9528	42.824	41.0254	37.0855	36.6877		22.7264	22.9178	34.5277	29.0328	35.6251	24.6124	29.1501		4.5409	0.00126551	40.7151	28.3703	0.00171795
GAK	50.6734	50.2845	56.1409	53.2434	46.1955		27.1713	27.2116	35.8227	24.672	39.8887	25.9354	45.5869		5.01427	0.00128854	51.3075	32.3269	0.00172499
DDX27	35.2832	36.4022	45.0014	28.2175	32.3141		59.8991	50.7979	74.7602	65.6958	39.7864	52.1042	67.3958		-4.45672	0.00129157	35.4437	58.6342	0.00173203
POLD1	10.2407	11.27	13.4398	7.33109	7.76993		20.6884	27.0886	19.0799	19.1244	15.333	17.3184	20.5087		-5.29086	0.00131208	10.0103	19.8773	0.00173907
UIMC1	9.9367	7.64466	8.56276	5.87837	8.90256		14.1252	15.1222	15.9449	15.3901	10.0209	12.9167	14.1016		-5.0107	0.00132723	8.18501	13.9459	0.00174611
LAMTOR1	93.6378	107.359	84.2278	107.862	131.419		66.577	60.9365	80.018	57.6115	68.7865	63.6488	60.9613		5.43935	0.0013295	104.901	65.5057	0.00175315
LRR1	8.05059	5.56016	7.09732	5.16222	3.58381		16.5716	16.3337	12.7491	16.892	12.0232	13.0279	14.8888		-6.26638	0.00134739	5.89082	14.6409	0.00176019
ZBTB4	47.5496	49.1805	47.6804	31.7314	34.1593		22.0191	25.7603	32.7781	17.7214	26.5585	23.9295	17.9359		4.56171	0.00134976	42.0602	23.8147	0.00176723
VTA1	30.9557	30.2798	25.6451	29.719	23.3971		36.2072	43.2792	30.8768	37.3121	41.8642	39.856	42.8215		-4.62605	0.001368	27.9993	38.8881	0.00177427
C15orf17	12.7745	16.9369	18.7552	13.0063	15.3097		7.01166	11.8137	10.2199	7.56523	11.6312	5.88244	9.11544		4.39034	0.00138513	15.3565	9.03422	0.00178131
ARHGAP1	152.319	102.429	85.4201	117.168	99.7864		51.6639	65.2184	44.7831	64.214	65.0212	56.6549	88.6391		4.59215	0.00140817	111.424	62.3135	0.00178835
ACAD8	81.8309	53.3826	57.695	44.8331	61.9307		30.1333	29.4306	28.0668	29.9564	36.919	28.2725	36.0682		5.91417	0.00141332	59.9345	31.2638	0.00179539
SDC1	244.926	343.824	378.39	311.399	271.073		1071.19	423.653	438.595	984.545	668.221	1444.28	708.729		-4.71309	0.00141847	309.922	819.888	0.00180244
CDC25B	4.52889	15.8853	10.2776	3.9069	8.79728		50.4712	34.5703	21.8382	22.967	77.4343	46.1813	24.6878		-4.8939	0.00141909	8.67919	39.7357	0.00180948
KIAA0141	45.3662	36.7485	45.5585	33.5726	50.5202		20.1215	33.4742	23.8183	15.9477	29.908	19.5995	29.9178		4.37571	0.00142106	42.3532	24.6839	0.00181652
MTHFR	18.9008	19.5021	25.4208	19.7029	14.6427		9.71834	17.4194	9.58153	9.02596	10.9427	9.06618	13.6286		4.38477	0.00142746	19.6339	11.3404	0.00182356
KPNA4	36.4583	33.0832	28.2457	33.1136	22.983		48.2507	46.4187	42.6836	56.8737	50.923	53.2107	101.526		-4.36392	0.00143725	30.7768	57.1266	0.0018306
TMEM25	28.3943	18.5911	31.4704	10.6779	18.6308		6.05299	6.80036	10.0173	5.83319	4.36012	2.58479	11.6482		4.41618	0.00144126	21.5529	6.75671	0.00183764
FBXL5	90.0099	97.4622	101.443	79.2468	83.6254		57.3648	52.8799	44.7437	53.5984	74.791	52.8308	28.182		4.78683	0.00145908	90.3575	52.0558	0.00184468
TCF19	10.8296	10.3276	10.6388	4.65087	10.3545		24.8068	35.4125	24.2334	28.9595	16.3307	19.9578	22.8177		-5.22302	0.00146722	9.36027	24.6455	0.00185172
CENPI	2.25305	1.60509	3.3829	1.97981	1.49062		4.39635	4.15607	4.97844	6.53176	4.41158	6.19118	5.55754		-5.69462	0.00147497	2.14229	5.1747	0.00185876
KNTC1	2.89452	2.32611	3.34774	1.30917	1.96214		6.97212	5.58743	6.63903	9.06688	5.10763	6.29734	5.80642		-5.86342	0.00147537	2.36794	6.49669	0.0018658
BCKDHB	64.9471	46.6945	69.6014	75.3572	102.934		24.7972	34.9737	40.483	40.3122	39.8253	19.5053	13.3282		4.32318	0.00151553	71.9068	30.4607	0.00187284
WDR24	46.9245	43.4688	62.0906	47.7745	54.3894		21.4238	29.762	39.8946	40.8702	30.4407	19.8706	30.5508		4.42642	0.00152615	50.9296	30.4018	0.00187988
DIAPH3	4.73104	3.46532	8.37212	2.12532	3.66518		15.5779	8.15537	10.2316	23.3351	15.7885	13.4041	26.1046		-4.79253	0.00153786	4.4718	16.0853	0.00188693
PANK4	13.5045	12.2856	17.4851	11.2538	10.1365		5.61443	8.07953	8.65281	6.73978	10.5337	6.26369	6.13672		4.439	0.00154326	12.9331	7.43152	0.00189397
CHST9	2.24746	1.90314	2.18036	1.52985	1.7049		9.53438	5.55143	30.2528	20.4957	2.74934	8.30243	25.5224		-5.18022	0.00155805	1.91314	14.6298	0.00190101
RAE1	32.0557	35.0268	41.1085	29.9414	27.7076		58.0316	42.8059	67.8623	59.7842	35.7536	50.974	56.0848		-4.29214	0.00158112	33.168	53.0423	0.00190805
TFAP2B	131.008	106.002	40.7396	158.289	60.657		20.1608	35.2322	12.9666	7.93141	31.4284	15.1374	2.19318		4.31532	0.00159585	99.3391	17.8643	0.00191509
TAF11	35.5637	31.8298	30.5667	25.7666	35.2612		59.6601	43.0387	50.8364	47.2307	33.9887	54.7775	71.149		-4.34171	0.00161224	31.7976	51.5259	0.00192213
JAG1	39.1019	37.4787	43.8882	32.8102	21.1474		90.9604	41.6107	256.143	173.598	121.003	110.493	68.4965		-4.42889	0.0016319	34.8853	123.186	0.00192917
SERBP1	149.637	150.575	155.306	122.872	144.335		95.31	90.5718	95.0292	109.932	135.354	82.3077	120.05		4.35257	0.00163359	144.545	104.079	0.00193621
POMT1	11.557	14.0895	12.4559	11.3459	11.3634		26.6639	16.4402	19.0811	15.6262	14.1804	22.2495	25.4674		-4.62578	0.00163555	12.1623	19.9584	0.00194325
SFMBT1	6.57457	5.37059	7.09246	5.85011	7.54443		7.71185	12.9908	10.443	13.6018	8.5134	8.52203	9.7304		-4.27908	0.00163566	6.48643	10.2162	0.00195029
TLE2	97.3454	52.4829	28.5513	58.9506	72.7215		21.5125	13.691	27.2075	2.24324	9.28772	15.4592	4.25762		4.3792	0.00164226	62.0103	13.3798	0.00195733
BLOC1S1	104.092	164.404	111.312	146.047	208.811		70.5026	107.507	71.2503	38.9572	71.0761	65.7695	60.495		4.42234	0.0016511	146.933	69.3654	0.00196437
KIAA0895L	11.2245	8.01013	12.9836	8.65231	12.8241		3.10813	3.08845	11.5216	2.84627	4.51467	3.13363	4.52392		4.44865	0.00166305	10.7389	4.67667	0.00197141
RTTN	3.06853	3.03507	4.19182	2.25558	2.05624		7.31134	5.41225	6.6478	5.78007	4.70907	7.67213	4.61868		-4.9907	0.00166615	2.92145	6.02162	0.00197846
AASS	1.21691	0.956715	1.69246	0.849833	1.58637		0.191665	0.674401	0.460047	0.304917	0.366469	0.329055	1.01752		4.30914	0.00169817	1.26046	0.477725	0.0019855
ATXN7L1	7.92076	12.9304	9.74945	9.63552	8.02974		5.00707	3.23359	4.30528	6.42229	4.11669	3.77388	8.87455		4.28386	0.00170986	9.65317	5.10476	0.00199254
HPX	724.673	487.213	36.657	5920.67	948.795		12.4683	20.3607	73.0672	0.278261	1.33083	7.88034	1.1378		4.38451	0.00171701	1623.6	16.6462	0.00199958
SPTLC3	13.9405	16.9528	28.1354	22.0478	7.70874		73.7097	125.58	29.8967	51.7273	40.0871	83.1448	48.5423		-4.46293	0.00173213	17.757	64.6697	0.00200662
NDRG2	70.0085	62.9247	185.758	83.7828	134.792		15.7207	36.1255	37.7174	42.3027	13.2348	13.3307	56.9872		4.24197	0.00173735	107.453	30.7741	0.00201366
HSD17B4	85.1435	63.4559	46.8442	55.3972	64.5179		32.3474	60.9303	25.7428	22.9966	32.0404	34.1673	27.9436		4.23228	0.00173828	63.0717	33.7383	0.0020207
TMEM175	37.4559	39.5767	47.3203	32.1328	49.6452		27.8566	23.2667	38.009	21.7529	20.8377	26.0559	18.5223		4.23532	0.00175661	41.2262	25.1859	0.00202774
DBF4	8.1091	9.86165	10.5072	4.19554	6.13668		20.6631	18.1808	19.6249	23.9031	12.3281	16.7868	29.4714		-4.91382	0.00177247	7.76203	20.1369	0.00203478
CCNA2	8.06148	6.96979	16.7118	6.26013	4.57129		27.2427	13.8567	26.4808	41.9849	30.6035	23.6948	31.9359		-4.96095	0.00177333	8.5149	27.9713	0.00204182
TUSC3	148.27	138.489	95.5353	183.5	137.893		77.3128	58.7072	71.9542	85.2917	112.882	77.3077	51.7805		4.33525	0.00181171	140.737	76.4623	0.00204886
DBF4B	1.86554	1.10731	2.00442	1.02578	1.28808		3.78076	3.01372	5.24159	2.39711	1.76978	4.08588	3.21176		-4.26731	0.00181175	1.45823	3.35723	0.0020559
BSND	8.20262	0.527409	18.3477	0.891115	1.7759		0.214399	1e-06	1e-06	1e-06	1e-06	0.160572	1e-06		4.84497	0.00183821	5.94895	0.053568	0.00206294
MACROD1	43.6432	47.6165	88.5505	53.3664	66.909		29.3012	37.9342	23.4449	16.8733	25.308	15.734	43.588		4.20324	0.00184515	60.0171	27.4548	0.00206998
FAM20A	44.4535	34.8079	16.7185	54.4268	83.0933		12.1238	9.89616	5.33778	18.0298	12.7412	9.16804	3.5769		4.48645	0.00184517	46.7	10.1248	0.00207703
CDK1	24.2445	16.6411	36.0703	10.2526	19.2248		51.9193	47.9766	51.9394	114.528	66.1975	44.818	96.8998		-4.72271	0.0018622	21.2867	67.7541	0.00208407
NET1	73.0338	146.849	102.664	85.0715	73.6068		45.6192	56.5665	40.6918	35.3065	53.7913	43.2034	34.6885		5.08495	0.00186622	96.245	44.2667	0.00209111
EIF2AK4	32.7512	19.3577	22.9973	20.3721	21.3275		15.1981	8.02883	13.6766	13.4042	15.4375	16.8779	10.2051		4.2098	0.00188032	23.3612	13.2612	0.00209815
PDGFC	179.478	126.08	134.988	85.6085	159.855		55.3513	57.494	55.4657	22.1515	99.1522	50.5094	70.8319		4.19616	0.00188064	137.202	58.708	0.00210519
MOGS	25.6762	30.2219	31.9962	36.6327	25.3757		64.9392	61.1569	37.0521	36.8746	42.3475	57.0665	77.6195		-4.26535	0.00188578	29.9805	53.8652	0.00211223
GRAMD3	41.2902	32.5693	30.6187	54.3349	27.4063		16.3749	20.6958	10.8647	16.3395	28.9082	17.4554	18.1835		4.306	0.00189488	37.2439	18.4031	0.00211927
ACADM	108.649	111.773	140.242	224.175	169.341		69.5896	55.3459	95.5111	81.8456	69.1094	58.6834	51.1106		4.83496	0.00190537	150.836	68.7422	0.00212631
SEPT7	126.651	137.241	108.171	113.999	115.487		142.969	159.118	140.94	131.285	166.838	165.913	179.042		-4.23259	0.00190949	120.31	155.158	0.00213335
PCDHB4	8.78796	8.98129	8.39928	12.1527	8.67227		5.6478	9.292	4.55701	3.22614	5.2191	5.13782	4.26724		4.3313	0.00191273	9.3987	5.3353	0.00214039
RDH11	29.4202	26.6408	33.4505	21.2832	24.0864		55.3026	61.9687	33.5271	30.3516	44.4118	56.3079	46.5816		-4.16888	0.00193707	26.9762	46.9216	0.00214743
CLMN	21.4155	13.51	18.8962	48.9578	33.721		6.14114	7.97385	5.23991	7.47783	7.43858	6.02759	4.01875		5.66918	0.00194804	27.3001	6.33109	0.00215447
STS	3.52668	8.23515	3.77594	7.61719	11.9743		2.75856	2.033	1.17821	0.915921	1.92342	1.52538	1.7844		4.92166	0.00195516	7.02585	1.73127	0.00216152
NFE2L2	269.388	265.501	172.285	355.25	219.486		106.455	112.802	127.887	113.509	162.903	105.986	176.148		4.70256	0.00198529	256.382	129.384	0.00216856
YIPF1	45.1213	61.7073	39.6996	74.1814	88.4434		21.8821	20.7956	23.523	22.79	29.2835	19.5489	27.0998		5.8462	0.00198986	61.8306	23.5604	0.0021756
TEC	2.25513	4.89395	6.42182	6.65063	2.25398		16.8224	25.7921	14.1166	27.7549	6.23244	14.1432	16.0404		-4.45572	0.00200596	4.4951	17.2717	0.00218264
SUOX	103.799	74.2912	61.0928	118.537	88.6656		46.7091	61.1556	65.758	36.2466	30.8886	43.7811	27.8085		4.17428	0.00200671	89.2771	44.6211	0.00218968
FASTK	61.3613	58.6191	81.3597	47.8963	82.8031		20.3427	33.8216	42.4378	29.838	57.5872	19.2865	22.5582		4.17547	0.00202774	66.4079	32.2674	0.00219672
UNC5D	6.00151	1.47453	0.823172	1.47153	1.10387		0.049653	0.89718	0.258093	0.119371	0.490991	0.0431024	0.033265		4.15698	0.00204422	2.17492	0.270236	0.00220376
RAB1B	181.813	197.011	178.008	181.362	212.87		122.931	116.487	103.41	109.312	148.199	116.482	193.457		4.51462	0.00205582	190.213	130.04	0.0022108
MCM5	27.1002	14.3555	25.9782	12.5661	18.7776		44.2531	63.4725	31.675	37.7225	37.3963	36.3951	86.9822		-4.26734	0.00206034	19.7555	48.271	0.00221784
BPHL	83.9097	70.2074	57.2278	71.7091	127.848		24.0814	13.5289	75.8581	30.3731	13.1252	12.8865	32.902		4.2887	0.00206664	82.1804	28.965	0.00222488
SMARCD2	106.766	48.6729	56.7914	59.1495	58.2274		27.5834	34.0112	28.116	25.2912	23.922	24.3416	28.0994		5.93185	0.00206789	65.9214	27.3378	0.00223192
TM2D2	38.6827	42.6782	41.1275	45.5338	40.7713		26.2831	19.0246	21.9583	21.1034	40.3117	21.8407	13.6368		4.90604	0.00209563	41.7587	23.4512	0.00223896
RAP2A	28.1392	33.5057	30.9987	28.5626	15.9539		36.5652	46.9753	45.2088	57.2653	72.9992	60.1862	93.6982		-4.23648	0.00210086	27.432	58.9855	0.002246
PAQR4	14.2932	15.22	13.1829	12.5566	20.3241		28.066	21.7002	27.2516	19.8493	24.6559	21.1574	25.9167		-4.79409	0.00211065	15.1154	24.0853	0.00225304
SRPK1	14.8653	10.7719	19.7609	15.6552	10.6992		22.0782	25.6274	20.4224	39.7014	21.6793	29.5514	35.5419		-4.31542	0.00211375	14.3505	27.8003	0.00226009
SPC24	7.38303	15.5673	19.3301	8.51705	13.338		23.0014	39.401	30.7408	59.0654	36.3143	25.8083	27.2141		-4.61552	0.00214052	12.8271	34.5065	0.00226713
APIP	144.968	124.421	157.823	117.278	171.103		60.0681	78.5931	61.4649	85.7108	73.866	51.9048	147.658		4.26128	0.00214349	143.119	79.8951	0.00227417
CCNE2	4.39387	4.5861	5.42421	1.39509	2.79525		17.8376	18.9507	7.67093	11.426	8.854	12.9537	20.8477		-4.79487	0.00214631	3.7189	14.0772	0.00228121
TAF10	154.066	195.682	171.797	199.847	308.352		93.5317	135.544	134.377	89.5246	121.321	81.032	87.9822		4.53844	0.00215591	205.949	106.188	0.00228825
TLE4	16.5041	10.2295	13.7945	11.0966	11.389		22.1123	24.6428	21.6515	19.8705	21.5244	23.1919	12.7765		-4.182	0.00215822	12.6027	20.8243	0.00229529
FAM53A	4.17421	4.59349	5.14022	1.7173	3.58898		0.819967	2.02127	0.741229	1.0023	1.70871	0.446728	1.96852		4.10508	0.00216825	3.84284	1.2441	0.00230233
GPX3	3459.96	1959.16	230.522	5083.2	369.537		80.4398	55.0288	168.499	105.568	10.1969	48.301	4.96542		4.36026	0.00216992	2220.48	67.5713	0.00230937
PRKCZ	28.5595	33.784	30.5194	24.3981	32.1028		20.2794	10.0037	24.3832	10.4667	19.6786	14.7751	17.6478		4.41685	0.0021793	29.8728	16.7478	0.00231641
PEX16	34.27	42.0969	42.4051	34.5557	35.5139		26.648	28.8602	31.9769	23.6343	22.7054	19.5762	33.1172		4.13799	0.0021808	37.7683	26.6455	0.00232345
EIF2B1	26.8452	27.0108	27.9551	24.5486	26.045		42.1364	29.1931	33.1007	54.3232	34.9256	39.4854	39.0755		-4.71214	0.00219027	26.4809	38.8914	0.00233049
TUBB3	68.5932	115.387	27.5981	48.6864	112.304		2.49046	17.7893	15.733	6.45646	42.3903	4.2292	1.56357		4.17883	0.00220453	74.5137	12.9503	0.00233753
IMPDH1	41.1349	55.8569	57.3974	51.4959	49.7109		63.4296	70.226	76.6109	77.5596	61.0904	62.8743	83.5203		-4.3535	0.00220476	51.1192	70.7587	0.00234457
CCNF	4.76125	3.45417	8.14832	3.34688	2.00501		12.9886	10.9313	13.288	21.7291	13.2477	10.5097	23.0265		-5.05464	0.00220907	4.34313	15.103	0.00235162
CAMTA2	31.8041	25.3792	29.4761	23.1432	26.6192		18.0455	16.1951	24.9183	20.4439	22.4133	17.4708	18.4403		4.12154	0.00221396	27.2844	19.7039	0.00235866
BTF3L4	30.073	31.3949	31.6503	27.68	39.591		17.7018	18.0928	21.1665	20.0111	30.8629	13.6364	22.5131		4.15402	0.00222068	32.0778	20.5692	0.0023657
ACACB	1.46395	9.22228	14.2461	11.3136	28.6375		0.418255	0.502845	1.07598	0.641715	1.02388	0.762145	0.143848		4.99883	0.00223048	12.9767	0.652667	0.00237274
MICU1	25.3795	27.1869	28.5185	30.0182	28.0991		44.6087	33.6248	35.6931	33.5777	28.6099	39.1523	38.5049		-4.26782	0.00223821	27.8404	36.2531	0.00237978
PPAPDC1B	20.7698	17.4517	20.6449	27.8806	28.8696		11.9407	9.87845	9.77583	5.05455	14.7134	9.37092	18.7092		4.15477	0.00224121	23.1233	11.349	0.00238682
RFC3	14.5018	14.3966	14.5987	21.5183	13.3265		24.6471	31.1204	27.2403	39.6715	18.0336	20.0394	33.8809		-4.07037	0.00225245	15.6684	27.8047	0.00239386
NANS	114.639	130.678	139.795	180.134	157.149		68.5203	104.169	53.293	55.4956	126.259	78.8016	90.2901		4.13437	0.00225269	144.479	82.4041	0.0024009
TOE1	33.6977	36.9423	36.5796	36.3095	35.7685		15.2506	19.6698	30.655	26.84	24.6595	15.8139	23.6354		4.93334	0.00226835	35.8595	22.3606	0.00240794
MAP3K6	25.3275	23.5011	36.4568	19.1542	26.8057		6.38769	21.5015	15.7542	9.14026	11.4443	4.51441	8.95044		4.24991	0.00227368	26.2491	11.099	0.00241498
PDE7A	18.5323	16.7762	16.3893	22.2806	24.8009		11.0131	7.23905	14.7198	7.77686	3.23311	10.6392	5.10855		4.42306	0.00227659	19.7559	8.53281	0.00242202
ATMIN	71.6636	64.4896	55.2001	72.9582	65.7315		32.5515	38.164	50.0707	54.6176	49.5869	36.5448	55.0156		4.14681	0.00227963	66.0086	45.2216	0.00242906
SENP3	38.9744	43.4997	41.8191	33.8811	38.4246		24.73	30.0427	31.8486	33.5645	28.6684	24.1177	35.337		4.0646	0.002281	39.3198	29.7584	0.00243611
HIATL1	37.1428	39.1676	38.0247	36.7591	28.6077		60.725	63.822	36.5198	51.1714	46.3187	55.5129	51.6859		-4.05212	0.0023168	35.9404	52.2508	0.00244315
TMEM56	65.1285	55.8696	124.375	99.1068	83.0351		10.3399	14.2519	28.7286	99.0085	15.7067	12.9437	9.23802		4.33212	0.00232221	85.503	27.1739	0.00245019
LIG1	14.1112	14.9659	14.1603	11.3076	11.2944		22.733	22.9369	28.304	23.438	14.8038	15.659	18.0565		-4.08744	0.00234175	13.1679	20.8473	0.00245723
COMMD7	19.3909	20.2961	24.2904	17.3281	22.2588		39.054	21.4971	29.9704	35.5268	26.1797	34.6041	43.2475		-4.11073	0.00235423	20.7129	32.8685	0.00246427
PIGL	12.8442	13.367	12.1195	17.6458	12.2608		7.24319	4.07048	7.64231	3.1959	8.18386	10.336	3.38308		4.45568	0.00236466	13.6475	6.29355	0.00247131
FANCI	5.38528	3.96684	6.88735	3.43866	3.68091		8.49246	6.06466	8.80654	14.4146	9.06811	7.77664	13.0103		-4.19537	0.00239772	4.67181	9.6619	0.00247835
C11orf49	30.8471	21.4506	22.7004	24.1775	30.3038		17.8164	18.5371	19.5845	15.6123	19.6639	15.1332	13.9574		4.47695	0.0024015	25.8959	17.1864	0.00248539
RFC4	30.5707	34.1782	43.2797	26.2783	23.8092		76.834	53.6589	49.7355	101.337	35.7664	54.9627	89.2903		-4.03693	0.00240196	31.6232	65.9407	0.00249243
CHMP1A	75.2954	79.4002	76.7791	62.5171	64.2277		54.4861	51.1374	40.6551	40.236	52.7086	54.647	66.9779		4.04496	0.00240242	71.6439	51.5497	0.00249947
S1PR2	17.7867	22.7353	20.6939	36.7214	19.4272		48.486	34.9683	60.9853	49.6092	28.4538	48.1135	56.0728		-4.26075	0.00243984	23.4729	46.6698	0.00250651
PLK1	15.2259	16.1876	21.1644	9.22873	8.22781		27.4675	23.4976	42.5999	56.0986	39.2251	20.7171	51.1773		-4.22369	0.00244273	14.0069	37.2547	0.00251355
AGXT2L2	19.0608	17.9676	26.4245	15.8519	17.7119		11.5691	20.0504	9.68598	8.67285	9.02855	8.09603	11.0979		4.02608	0.00245011	19.4033	11.1715	0.00252059
CLPB	26.6373	21.8108	37.2885	26.1184	25.8889		12.2921	15.6738	17.4968	19.8465	20.2356	13.1433	20.2109		4.12763	0.00249443	27.5488	16.9856	0.00252763
KCNJ14	1.34802	0.670522	0.397625	0.372531	0.764216		2.95568	2.08594	13.0678	2.88593	1.64525	3.28222	1.16434		-4.00554	0.00249622	0.710583	3.86959	0.00253468
ZDHHC4	25.0778	32.1335	20.1702	27.0273	20.4543		44.0862	40.045	39.8267	53.9282	34.0603	35.1266	32.9807		-4.33672	0.00249675	24.9726	40.0077	0.00254172
CCDC149	21.1107	15.3285	9.35753	13.6093	10.8545		7.43938	4.29107	4.0701	1.96781	6.42807	8.94969	6.6199		4.01903	0.00249828	14.0521	5.68086	0.00254876
SGSM3	58.3219	47.5125	57.0176	70.3439	37.357		19.0239	37.2097	26.1187	13.874	28.838	17.7209	43.0106		4.03585	0.002502	54.1106	26.5423	0.0025558
RAD21	119.54	111.565	118.511	100.473	91.5399		251.821	247.62	128.502	369.967	128.98	239.657	308.302		-4.50749	0.00252276	108.326	239.264	0.00256284
RPL26	3.59912	6.39451	5.12035	5.58556	7.33013		2.71291	3.37803	2.44639	2.06295	1.03309	2.14882	4.19164		4.01194	0.00254795	5.60593	2.56769	0.00256988
DRP2	3.67152	1.384	0.899708	1.11585	2.06405		0.281664	0.576224	0.431422	0.297685	0.553827	0.279112	0.0347208		4.02506	0.00255182	1.82703	0.350665	0.00257692
CENPC1	25.3604	32.057	36.4207	22.0241	17.1734		54.9391	53.6679	33.9413	67.7028	40.836	52.5835	84.5835		-4.15983	0.0025529	26.6071	55.4649	0.00258396
ELMO3	26.6588	31.2851	43.9126	25.196	28.3459		14.8811	15.2751	16.4313	8.82316	26.46	9.45216	19.9601		4.03358	0.0025545	31.0797	15.8976	0.002591
CMTM4	17.4165	9.81733	17.3667	16.2326	12.0319		8.41591	8.52843	7.40773	4.63835	9.36329	9.15836	7.17902		4.23297	0.00256005	14.573	7.81301	0.00259804
DAGLA	31.8319	13.9477	13.206	8.41106	12.6032		3.57185	2.92282	4.7444	4.60437	3.90061	4.01575	6.48003		5.19849	0.00257969	16	4.31998	0.00260508
TAF15	66.442	69.737	72.1182	58.6332	61.6144		102.522	85.0127	77.7496	88.1408	67.4942	98.8863	109.997		-4.08148	0.0025833	65.709	89.9718	0.00261212
NCDN	28.771	27.1096	35.9874	24.2823	37.8828		13.9878	20.9743	20.5152	17.9441	16.1948	16.8756	27.7637		4.0387	0.00259399	30.8066	19.1794	0.00261917
PCNP	64.0192	68.9578	60.6184	64.6833	64.0148		52.126	50.1777	52.2614	48.7994	64.6915	47.2293	58.1119		4.19694	0.00259959	64.4587	53.3425	0.00262621
KAT5	36.0739	36.5597	34.6727	32.1579	37.7759		24.944	24.9583	29.6191	21.3763	25.5763	20.8035	35.0725		4.34504	0.00261292	35.448	26.05	0.00263325
CES1	3021.07	1233.69	104.436	1607.21	1297.79		38.6571	220.687	198.266	40.7624	18.1778	16.2263	14.7704		4.2867	0.00261549	1452.84	78.221	0.00264029

## Sheet: Tabel S6H-ER-FDR0.1-1st
Table S6H (related to Figure 6): Functional annotation of the 1st group of genes of the heatmap of Figure S6A by DAVID
Annotation Cluster 1	Enrichment Score: 2.5834905723907537					List Total	Pop Hits	Pop Total	Fold Enrichment	Bonferroni	Benjamini	FDR
Category	Term	Count	%	PValue	Genes	48	44	5085	16.8537	0.000247988	0.000247988	0.00270889
KEGG_PATHWAY	hsa00280:Valine, leucine and isoleucine degradation	7	4.51613	2.43155e-06	ALDH7A1, ACADM, MCEE, BCKDHB, ECHS1, ACAD8, HMGCL	48	32	5085	19.8633	0.000924196	0.000462205	0.0100985
KEGG_PATHWAY	hsa00640:Propanoate metabolism	6	3.87097	9.0649e-06	ALDH7A1, ACADM, MLYCD, MCEE, ECHS1, ACACB	48	22	5085	19.2614	0.0977309	0.0336999	1.11699
KEGG_PATHWAY	hsa00410:beta-Alanine metabolism	4	2.58065	0.00100775	ALDH7A1, ACADM, MLYCD, ECHS1	14	64	1950	8.70536	0.059385	0.059385	4.10296
COG_ONTOLOGY	Lipid metabolism	4	2.58065	0.00762347	ACADM, ECHS1, ACAD8, ACACB	115	111	13528	5.29886	0.999999	0.999215	20.4142
GOTERM_BP_FAT	GO:0046395~carboxylic acid catabolic process	5	3.22581	0.0143698	ACADM, BCKDHB, ECHS1, ACAD8, HSD17B4	115	111	13528	5.29886	0.999999	0.999215	20.4142
GOTERM_BP_FAT	GO:0016054~organic acid catabolic process	5	3.22581	0.0143698	ACADM, BCKDHB, ECHS1, ACAD8, HSD17B4	155	23	19113	16.0839	0.998047	0.875004	18.6949
UP_SEQ_FEATURE	binding site:Substrate; via amide nitrogen	3	1.93548	0.0146056	ACADM, ECHS1, ACAD8	155	130	19113	4.74268	0.99988	0.835616	25.8809
UP_SEQ_FEATURE	region of interest:Substrate binding	5	3.22581	0.0210668	ACADM, ECHS1, ACAD8, UROD, PC	115	198	13528	3.56469	1	0.987	34.0352
GOTERM_BP_FAT	GO:0006631~fatty acid metabolic process	6	3.87097	0.0260286	PNPLA8, ACADM, MLYCD, ECHS1, HSD17B4, ACACB	48	40	5085	7.94531	0.995793	0.598212	44.9846
KEGG_PATHWAY	hsa00071:Fatty acid metabolism	3	1.93548	0.0522241	ALDH7A1, ACADM, ECHS1
Annotation Cluster 2	Enrichment Score: 2.1576412021716225					List Total	Pop Hits	Pop Total	Fold Enrichment	Bonferroni	Benjamini	FDR
Category	Term	Count	%	PValue	Genes	155	107	19235	6.9587	0.319375	0.175	2.15293
SP_PIR_KEYWORDS	Flavoprotein	6	3.87097	0.00170096	MTHFR, ACADM, NDUFA9, LDHD, ACAD8, ETFA	155	114	19235	6.53141	0.398461	0.119324	2.83423
SP_PIR_KEYWORDS	FAD	6	3.87097	0.00224643	MTHFR, ACADM, NDUFA9, LDHD, ACAD8, ETFA	115	639	13528	2.57729	0.936065	0.936065	4.29575
GOTERM_BP_FAT	GO:0055114~oxidation reduction	14	9.03226	0.00277942	SUOX, ACADM, NDUFA9, BCKDHB, LDHD, QDPR, ALDH7A1, MTHFR, DHRS3, HSDL2, HSD11B1, ACAD8, HSD17B4, ETFA	103	181	12983	4.87481	0.66458	0.66458	4.06295
GOTERM_MF_FAT	GO:0050662~coenzyme binding	7	4.51613	0.00301306	SUOX, ACADM, NDUFA9, LDHD, ACAD8, HMGCL, ETFA	103	249	12983	4.04975	0.714165	0.465364	4.64391
GOTERM_MF_FAT	GO:0048037~cofactor binding	8	5.16129	0.00345352	AGXT2L2, SUOX, ACADM, NDUFA9, LDHD, ACAD8, HMGCL, ETFA	103	72	12983	7.0027	0.999032	0.901067	23.1653
GOTERM_MF_FAT	GO:0050660~FAD binding	4	2.58065	0.0189885	ACADM, LDHD, ACAD8, ETFA	103	221	12983	3.42213	0.999984	0.890628	34.3048
GOTERM_MF_FAT	GO:0009055~electron carrier activity	6	3.87097	0.0301039	SUOX, DHRS3, ACADM, QDPR, ACAD8, ETFA	155	61	19113	6.06441	1	0.986101	72.1042
UP_SEQ_FEATURE	nucleotide phosphate-binding region:FAD	3	1.93548	0.0867656	ACADM, ACAD8, ETFA
Annotation Cluster 3	Enrichment Score: 2.086873859813264					List Total	Pop Hits	Pop Total	Fold Enrichment	Bonferroni	Benjamini	FDR
Category	Term	Count	%	PValue	Genes	144	59	16659	9.80403	0.428298	0.428298	2.21459
INTERPRO	IPR002198:Short-chain dehydrogenase/reductase SDR	5	3.22581	0.00164317	DHRS3, HSDL2, HSD11B1, QDPR, HSD17B4	155	562	19235	2.87057	0.352278	0.134774	2.4268
SP_PIR_KEYWORDS	oxidoreductase	13	8.3871	0.00191981	SUOX, ACADM, NDUFA9, BCKDHB, LDHD, QDPR, ALDH7A1, MTHFR, DHRS3, HSDL2, HSD11B1, HSD17B4, ACAD8	115	639	13528	2.57729	0.936065	0.936065	4.29575
GOTERM_BP_FAT	GO:0055114~oxidation reduction	14	9.03226	0.00277942	SUOX, ACADM, NDUFA9, BCKDHB, LDHD, QDPR, ALDH7A1, MTHFR, DHRS3, HSDL2, HSD11B1, ACAD8, HSD17B4, ETFA	144	53	16659	8.73113	0.973381	0.836848	13.5182
INTERPRO	IPR002347:Glucose/ribitol dehydrogenase	4	2.58065	0.0106085	DHRS3, HSDL2, HSD11B1, HSD17B4	155	658	19113	2.24881	0.99948	0.849026	22.1893
UP_SEQ_FEATURE	active site:Proton acceptor	12	7.74194	0.0176782	MAP3K6, DHRS3, ALDH7A1, ACADM, MAP2K1, HSDL2, HSD11B1, QDPR, RPS6KB2, ACAD8, HSD17B4, GAK	155	156	19235	3.97746	0.999795	0.572263	38.1469
SP_PIR_KEYWORDS	nadp	5	3.22581	0.0368801	DHRS3, MTHFR, HSDL2, HSD11B1, QDPR	144	150	16659	3.85625	0.999999	0.990939	43.1749
INTERPRO	IPR016040:NAD(P)-binding domain	5	3.22581	0.0406543	DHRS3, HSDL2, NDUFA9, HSD11B1, HSD17B4
Annotation Cluster 4	Enrichment Score: 2.047600930191694					List Total	Pop Hits	Pop Total	Fold Enrichment	Bonferroni	Benjamini	FDR
Category	Term	Count	%	PValue	Genes	155	90	19235	6.89427	0.738979	0.154557	7.31656
SP_PIR_KEYWORDS	peroxisome	5	3.22581	0.00592553	LONP2, HSDL2, MLYCD, PEX16, HSD17B4	117	43	12782	10.1626	0.751479	0.501482	8.32199
GOTERM_CC_FAT	GO:0044438~microbody part	4	2.58065	0.00690258	PNPLA8, LONP2, PEX16, HSD17B4	117	43	12782	10.1626	0.751479	0.501482	8.32199
GOTERM_CC_FAT	GO:0044439~peroxisomal part	4	2.58065	0.00690258	PNPLA8, LONP2, PEX16, HSD17B4	117	103	12782	5.30329	0.94481	0.619267	16.5395
GOTERM_CC_FAT	GO:0042579~microbody	5	3.22581	0.0143094	PNPLA8, LONP2, MLYCD, PEX16, HSD17B4	117	103	12782	5.30329	0.94481	0.619267	16.5395
GOTERM_CC_FAT	GO:0005777~peroxisome	5	3.22581	0.0143094	PNPLA8, LONP2, MLYCD, PEX16, HSD17B4
Annotation Cluster 5	Enrichment Score: 1.8622633757183356					List Total	Pop Hits	Pop Total	Fold Enrichment	Bonferroni	Benjamini	FDR
Category	Term	Count	%	PValue	Genes	155	118	19235	6.31001	0.446027	0.111418	3.28596
SP_PIR_KEYWORDS	lyase	6	3.87097	0.00261004	MLYCD, ACO1, ECHS1, HSD17B4, UROD, HMGCL	115	195	13528	3.61953	1	0.992674	32.463
GOTERM_BP_FAT	GO:0051186~cofactor metabolic process	6	3.87097	0.0245732	PANK4, MLYCD, ACO1, MCEE, UROD, HMGCL	115	153	13528	3.84427	1	0.989156	47.8022
GOTERM_BP_FAT	GO:0006732~coenzyme metabolic process	5	3.22581	0.040374	PANK4, MLYCD, ACO1, MCEE, HMGCL
Annotation Cluster 6	Enrichment Score: 1.7365301057337952					List Total	Pop Hits	Pop Total	Fold Enrichment	Bonferroni	Benjamini	FDR
Category	Term	Count	%	PValue	Genes	155	467	19113	3.9607	0.0109416	0.0109416	0.0364923
UP_SEQ_FEATURE	transit peptide:Mitochondrion	15	9.67742	2.59475e-05	SUOX, ACADM, NDUFA9, HINT2, BCKDHB, LDHD, KIAA0141, ECHS1, COG8, MLYCD, MCEE, ACAD8, HMGCL, PC, ETFA	155	476	19235	3.91061	0.0067234	0.0067234	0.0381545
SP_PIR_KEYWORDS	transit peptide	15	9.67742	2.98496e-05	SUOX, ACADM, NDUFA9, HINT2, BCKDHB, LDHD, KIAA0141, ECHS1, COG8, MLYCD, MCEE, ACAD8, HMGCL, PC, ETFA	117	1087	12782	2.31159	0.0533471	0.0533471	0.341559
GOTERM_CC_FAT	GO:0005739~mitochondrion	23	14.8387	0.000272713	SUOX, TUSC3, ACADM, NDUFA9, LDHD, BCKDHB, HINT2, KIAA0141, ECHS1, BPHL, MACROD1, LAP3, AGXT2L2, ALDH7A1, HSDL2, COG8, MLYCD, MCEE, ACAD8, HSD17B4, HMGCL, PC, ETFA	155	832	19235	2.38648	0.471673	0.100881	3.54494
SP_PIR_KEYWORDS	mitochondrion	16	10.3226	0.0028192	SUOX, ACADM, NDUFA9, LDHD, HINT2, BCKDHB, KIAA0141, ECHS1, AGXT2L2, COG8, MLYCD, MCEE, ACAD8, HMGCL, PC, ETFA	103	181	12983	4.87481	0.66458	0.66458	4.06295
GOTERM_MF_FAT	GO:0050662~coenzyme binding	7	4.51613	0.00301306	SUOX, ACADM, NDUFA9, LDHD, ACAD8, HMGCL, ETFA	103	249	12983	4.04975	0.714165	0.465364	4.64391
GOTERM_MF_FAT	GO:0048037~cofactor binding	8	5.16129	0.00345352	AGXT2L2, SUOX, ACADM, NDUFA9, LDHD, ACAD8, HMGCL, ETFA	117	227	12782	3.36888	0.970016	0.442623	19.6576
GOTERM_CC_FAT	GO:0005759~mitochondrial matrix	7	4.51613	0.0172968	ACADM, NDUFA9, BCKDHB, ECHS1, HMGCL, PC, ETFA	117	227	12782	3.36888	0.970016	0.442623	19.6576
GOTERM_CC_FAT	GO:0031980~mitochondrial lumen	7	4.51613	0.0172968	ACADM, NDUFA9, BCKDHB, ECHS1, HMGCL, PC, ETFA	117	595	12782	1.65249	1	0.893816	90.7382
GOTERM_CC_FAT	GO:0044429~mitochondrial part	9	5.80645	0.172769	SUOX, ACADM, NDUFA9, LDHD, BCKDHB, ECHS1, HMGCL, PC, ETFA	117	620	12782	1.23344	1	0.98644	99.9814
GOTERM_CC_FAT	GO:0031967~organelle envelope	7	4.51613	0.49575	SUOX, NUP88, NDUFA9, LDHD, NUCB2, HMGCL, PC	117	622	12782	1.22948	1	0.985134	99.9828
GOTERM_CC_FAT	GO:0031975~envelope	7	4.51613	0.498912	SUOX, NUP88, NDUFA9, LDHD, NUCB2, HMGCL, PC	117	306	12782	1.42808	1	0.984908	99.9919
GOTERM_CC_FAT	GO:0005743~mitochondrial inner membrane	4	2.58065	0.528147	NDUFA9, LDHD, HMGCL, PC	117	419	12782	1.30367	1	0.98355	99.9924
GOTERM_CC_FAT	GO:0005740~mitochondrial envelope	5	3.22581	0.530501	SUOX, NDUFA9, LDHD, HMGCL, PC	117	329	12782	1.32824	1	0.985358	99.998
GOTERM_CC_FAT	GO:0019866~organelle inner membrane	4	2.58065	0.577506	NDUFA9, LDHD, HMGCL, PC	117	394	12782	1.10912	1	0.989416	100
GOTERM_CC_FAT	GO:0031966~mitochondrial membrane	4	2.58065	0.698606	NDUFA9, LDHD, HMGCL, PC
Annotation Cluster 7	Enrichment Score: 1.3414072743107492					List Total	Pop Hits	Pop Total	Fold Enrichment	Bonferroni	Benjamini	FDR
Category	Term	Count	%	PValue	Genes	115	111	13528	5.29886	0.999999	0.999215	20.4142
GOTERM_BP_FAT	GO:0046395~carboxylic acid catabolic process	5	3.22581	0.0143698	ACADM, BCKDHB, ECHS1, ACAD8, HSD17B4	115	111	13528	5.29886	0.999999	0.999215	20.4142
GOTERM_BP_FAT	GO:0016054~organic acid catabolic process	5	3.22581	0.0143698	ACADM, BCKDHB, ECHS1, ACAD8, HSD17B4	115	28	13528	12.6037	1	0.996864	30.8019
GOTERM_BP_FAT	GO:0006635~fatty acid beta-oxidation	3	1.93548	0.0230696	ACADM, ECHS1, HSD17B4	115	198	13528	3.56469	1	0.987	34.0352
GOTERM_BP_FAT	GO:0006631~fatty acid metabolic process	6	3.87097	0.0260286	PNPLA8, ACADM, MLYCD, ECHS1, HSD17B4, ACACB	115	36	13528	9.8029	1	0.99027	44.6634
GOTERM_BP_FAT	GO:0009062~fatty acid catabolic process	3	1.93548	0.0368153	ACADM, ECHS1, HSD17B4	115	39	13528	9.04883	1	0.986454	49.684
GOTERM_BP_FAT	GO:0034440~lipid oxidation	3	1.93548	0.0426049	ACADM, ECHS1, HSD17B4	115	39	13528	9.04883	1	0.986454	49.684
GOTERM_BP_FAT	GO:0019395~fatty acid oxidation	3	1.93548	0.0426049	ACADM, ECHS1, HSD17B4	115	173	13528	3.39985	1	0.995543	61.3551
GOTERM_BP_FAT	GO:0016042~lipid catabolic process	5	3.22581	0.058488	PNPLA8, DAGLA, ACADM, ECHS1, HSD17B4	155	62	19235	6.00468	1	0.774928	69.3052
SP_PIR_KEYWORDS	fatty acid metabolism	3	1.93548	0.0882446	ACADM, ECHS1, HSD17B4	115	69	13528	5.11456	1	0.998768	85.4188
GOTERM_BP_FAT	GO:0030258~lipid modification	3	1.93548	0.114899	ACADM, ECHS1, HSD17B4	155	151	19235	3.28733	1	0.802057	80.7818
SP_PIR_KEYWORDS	lipid metabolism	4	2.58065	0.121034	ACADM, HSD11B1, ECHS1, HSD17B4	115	76	13528	4.64348	1	0.997983	89.7627
GOTERM_BP_FAT	GO:0044242~cellular lipid catabolic process	3	1.93548	0.134522	ACADM, ECHS1, HSD17B4

## Sheet: Tabel S6I-ER-FDR0.1-2nd
Table S6I (related to Figure 6): Functional annotation of the 2nd group of genes of the heatmap of Figure S6A by DAVID
Annotation Cluster 1	Enrichment Score: 4.923538135207338					List Total	Pop Hits	Pop Total	Fold Enrichment	Bonferroni	Benjamini	FDR
Category	Term	Count	%	PValue	Genes	33	461	19235	12.6438	2.90388e-06	2.90388e-06	4.29324e-05
SP_PIR_KEYWORDS	cell cycle	10	30.303	4.14841e-08	CCNE2, CDC45, FANCI, CCNF, KNTC1, NUF2, CDCA2, MTBP, SKA3, CEP55	26	776	13528	8.046	9.11371e-06	9.11371e-06	5.52715e-05
GOTERM_BP_FAT	GO:0007049~cell cycle	12	36.3636	4.38161e-08	CCNE2, CDC45, FANCI, CENPA, POLE, CCNF, KNTC1, NUF2, CDCA2, MTBP, SKA3, CEP55	26	370	13528	12.6561	4.34686e-05	2.17346e-05	0.000263627
GOTERM_BP_FAT	GO:0000278~mitotic cell cycle	9	27.2727	2.08988e-07	CENPA, POLE, CCNF, KNTC1, NUF2, CDCA2, MTBP, SKA3, CEP55	33	264	19235	15.4551	0.000296848	9.89591e-05	0.0043893
SP_PIR_KEYWORDS	cell division	7	21.2121	4.2413e-06	CCNE2, CCNF, KNTC1, NUF2, CDCA2, SKA3, CEP55	26	565	13528	8.28809	0.00105487	0.000351747	0.00640057
GOTERM_BP_FAT	GO:0022402~cell cycle process	9	27.2727	5.07415e-06	CENPA, POLE, CCNF, KNTC1, NUF2, CDCA2, MTBP, SKA3, CEP55	26	414	13528	10.0543	0.00148092	0.000370435	0.00898746
GOTERM_BP_FAT	GO:0022403~cell cycle phase	8	24.2424	7.12504e-06	POLE, CCNF, KNTC1, NUF2, CDCA2, MTBP, SKA3, CEP55	33	183	19235	19.1108	0.000844171	0.00021111	0.0124851
SP_PIR_KEYWORDS	mitosis	6	18.1818	1.20646e-05	CCNF, KNTC1, NUF2, CDCA2, SKA3, CEP55	26	295	13528	12.3463	0.00265091	0.000530745	0.0160968
GOTERM_BP_FAT	GO:0051301~cell division	7	21.2121	1.27616e-05	CCNE2, CCNF, KNTC1, NUF2, CDCA2, SKA3, CEP55	26	220	13528	14.1902	0.00916891	0.00153402	0.055847
GOTERM_BP_FAT	GO:0000280~nuclear division	6	18.1818	4.42837e-05	CCNF, KNTC1, NUF2, CDCA2, SKA3, CEP55	26	220	13528	14.1902	0.00916891	0.00153402	0.055847
GOTERM_BP_FAT	GO:0007067~mitosis	6	18.1818	4.42837e-05	CCNF, KNTC1, NUF2, CDCA2, SKA3, CEP55	26	224	13528	13.9368	0.00998778	0.00143297	0.0608582
GOTERM_BP_FAT	GO:0000087~M phase of mitotic cell cycle	6	18.1818	4.82584e-05	CCNF, KNTC1, NUF2, CDCA2, SKA3, CEP55	26	229	13528	13.6325	0.0110892	0.00139293	0.0676049
GOTERM_BP_FAT	GO:0048285~organelle fission	6	18.1818	5.361e-05	CCNF, KNTC1, NUF2, CDCA2, SKA3, CEP55	26	329	13528	9.48889	0.0592733	0.00609163	0.369879
GOTERM_BP_FAT	GO:0000279~M phase	6	18.1818	0.000293719	CCNF, KNTC1, NUF2, CDCA2, SKA3, CEP55	33	636	19235	3.6659	0.998417	0.369108	61.4574
SP_PIR_KEYWORDS	cytoskeleton	4	12.1212	0.088008	PLK4, KNTC1, SKA3, CEP55
Annotation Cluster 2	Enrichment Score: 4.473415544604618					List Total	Pop Hits	Pop Total	Fold Enrichment	Bonferroni	Benjamini	FDR
Category	Term	Count	%	PValue	Genes	20	124	12782	30.9242	3.80127e-05	3.80127e-05	0.000781074
GOTERM_CC_FAT	GO:0000775~chromosome, centromeric region	6	18.1818	8.26378e-07	CENPM, CENPA, KNTC1, NUF2, SKA3, CENPI	20	58	12782	55.0948	6.46756e-05	3.23383e-05	0.00132895
GOTERM_CC_FAT	GO:0000777~condensed chromosome kinetochore	5	15.1515	1.40604e-06	CENPM, CENPA, KNTC1, NUF2, SKA3	20	66	12782	48.4167	0.00010904	3.6348e-05	0.00224059
GOTERM_CC_FAT	GO:0000779~condensed chromosome, centromeric region	5	15.1515	2.37056e-06	CENPM, CENPA, KNTC1, NUF2, SKA3	33	63	19235	46.2602	0.000245464	0.000122739	0.00362943
SP_PIR_KEYWORDS	kinetochore	5	15.1515	3.50705e-06	CENPM, CENPA, KNTC1, NUF2, SKA3	20	77	12782	41.5	0.000202623	5.06597e-05	0.00416372
GOTERM_CC_FAT	GO:0000776~kinetochore	5	15.1515	4.40529e-06	CENPM, CENPA, KNTC1, NUF2, SKA3	20	129	12782	24.7713	0.00156857	0.000313911	0.0322502
GOTERM_CC_FAT	GO:0000793~condensed chromosome	5	15.1515	3.41256e-05	CENPM, CENPA, KNTC1, NUF2, SKA3	20	460	12782	9.72543	0.00175838	0.000293278	0.0361554
GOTERM_CC_FAT	GO:0005694~chromosome	7	21.2121	3.82585e-05	CENPM, FANCI, CENPA, KNTC1, NUF2, SKA3, CENPI	20	386	12782	9.9342	0.00918286	0.00131703	0.189376
GOTERM_CC_FAT	GO:0044427~chromosomal part	6	18.1818	0.000200529	CENPM, CENPA, KNTC1, NUF2, SKA3, CENPI	20	2596	12782	2.70805	0.0783313	0.0101444	1.66207
GOTERM_CC_FAT	GO:0043228~non-membrane-bounded organelle	11	33.3333	0.00177168	PLK4, CENPM, CDC45, GPR19, FANCI, CENPA, KNTC1, NUF2, SKA3, CEP55, CENPI	20	2596	12782	2.70805	0.0783313	0.0101444	1.66207
GOTERM_CC_FAT	GO:0043232~intracellular non-membrane-bounded organelle	11	33.3333	0.00177168	PLK4, CENPM, CDC45, GPR19, FANCI, CENPA, KNTC1, NUF2, SKA3, CEP55, CENPI	33	145	19235	16.0794	0.11682	0.0137081	1.81986
SP_PIR_KEYWORDS	chromosomal protein	4	12.1212	0.00177309	CENPM, FANCI, CENPA, CENPI
Annotation Cluster 3	Enrichment Score: 2.556397621377679					List Total	Pop Hits	Pop Total	Fold Enrichment	Bonferroni	Benjamini	FDR
Category	Term	Count	%	PValue	Genes	26	506	13528	7.19793	0.0519593	0.00591111	0.323073
GOTERM_BP_FAT	GO:0006259~DNA metabolic process	7	21.2121	0.000256495	CCNE2, CDC45, RAD51AP1, FANCI, DTL, POLE, UIMC1	33	205	19235	14.2166	0.0246555	0.00498046	0.368407
SP_PIR_KEYWORDS	DNA damage	5	15.1515	0.000356572	RAD51AP1, FANCI, DTL, POLE, UIMC1	33	191	19235	12.2069	0.23758	0.0267611	3.93105
SP_PIR_KEYWORDS	dna repair	4	12.1212	0.0038676	RAD51AP1, FANCI, POLE, UIMC1	26	373	13528	6.97463	0.61246	0.070323	5.58675
GOTERM_BP_FAT	GO:0006974~response to DNA damage stimulus	5	15.1515	0.00454701	RAD51AP1, FANCI, DTL, POLE, UIMC1	26	284	13528	7.32828	0.956546	0.188661	17.3198
GOTERM_BP_FAT	GO:0006281~DNA repair	4	12.1212	0.0149641	RAD51AP1, FANCI, POLE, UIMC1	26	566	13528	4.59636	0.981743	0.221355	21.5555
GOTERM_BP_FAT	GO:0033554~cellular response to stress	5	15.1515	0.0190621	RAD51AP1, FANCI, DTL, POLE, UIMC1
Annotation Cluster 4	Enrichment Score: 1.5964577087933682					List Total	Pop Hits	Pop Total	Fold Enrichment	Bonferroni	Benjamini	FDR
Category	Term	Count	%	PValue	Genes	26	506	13528	7.19793	0.0519593	0.00591111	0.323073
GOTERM_BP_FAT	GO:0006259~DNA metabolic process	7	21.2121	0.000256495	CCNE2, CDC45, RAD51AP1, FANCI, DTL, POLE, UIMC1	26	190	13528	10.9538	0.647142	0.0717056	6.12204
GOTERM_BP_FAT	GO:0006260~DNA replication	4	12.1212	0.0049956	CCNE2, CDC45, DTL, POLE	33	88	19235	19.8709	0.483319	0.0582636	9.30122
SP_PIR_KEYWORDS	dna replication	3	9.09091	0.00938892	CDC45, DTL, POLE	20	1450	12782	2.64455	0.929254	0.184328	41.9713
GOTERM_CC_FAT	GO:0031981~nuclear lumen	6	18.1818	0.0559533	CCNE2, PLK4, CDC45, GPR19, FANCI, POLE	20	1779	12782	2.15548	0.996064	0.32668	67.948
GOTERM_CC_FAT	GO:0070013~intracellular organelle lumen	6	18.1818	0.113417	CCNE2, PLK4, CDC45, GPR19, FANCI, POLE	20	1820	12782	2.10692	0.997506	0.329413	70.818
GOTERM_CC_FAT	GO:0043233~organelle lumen	6	18.1818	0.122172	CCNE2, PLK4, CDC45, GPR19, FANCI, POLE	20	1856	12782	2.06606	0.998361	0.330241	73.2273
GOTERM_CC_FAT	GO:0031974~membrane-enclosed lumen	6	18.1818	0.130139	CCNE2, PLK4, CDC45, GPR19, FANCI, POLE	20	882	12782	2.89841	0.998996	0.333777	75.7957
GOTERM_CC_FAT	GO:0005654~nucleoplasm	4	12.1212	0.139371	CCNE2, CDC45, FANCI, POLE
Annotation Cluster 5	Enrichment Score: 1.38656782735741					List Total	Pop Hits	Pop Total	Fold Enrichment	Bonferroni	Benjamini	FDR
Category	Term	Count	%	PValue	Genes	20	549	12782	5.82058	0.302362	0.0392165	7.13116
GOTERM_CC_FAT	GO:0015630~microtubule cytoskeleton	5	15.1515	0.00779674	PLK4, CDC45, KNTC1, SKA3, CEP55	33	3332	19235	1.92427	0.938585	0.193155	33.8008
SP_PIR_KEYWORDS	cytoplasm	11	33.3333	0.0390747	PLK4, CENPM, CDC45, DTL, KNTC1, SKA3, CEP55, TRAIP, IL17RD, MELK, HMMR	20	224	12782	8.55937	0.867521	0.183014	33.9878
GOTERM_CC_FAT	GO:0005813~centrosome	3	9.09091	0.0429905	PLK4, CDC45, CEP55	20	952	12782	3.35662	0.89704	0.186715	37.32
GOTERM_CC_FAT	GO:0044430~cytoskeletal part	5	15.1515	0.0482206	PLK4, CDC45, KNTC1, SKA3, CEP55	20	253	12782	7.57826	0.920267	0.190028	40.5276
GOTERM_CC_FAT	GO:0005815~microtubule organizing center	3	9.09091	0.0534957	PLK4, CDC45, CEP55	20	1381	12782	2.3139	0.999122	0.3236	76.4494
GOTERM_CC_FAT	GO:0005856~cytoskeleton	5	15.1515	0.14186	PLK4, CDC45, KNTC1, SKA3, CEP55

## Sheet: Tabel S6J-ER-FDR0.1-3rd
Table S6J (related to Figure 6): Functional annotation of the 3rd group of genes of the heatmap of Figure S6A by DAVID
[truncated: 160 more rows]
