# Supplementary material for: Molecular Homology and Difference between Spontaneous Canine Mammary Cancer and Human Breast Cancer
Source: Oxford University Press journal article supplement (doi:10.1158/0008-5472.can-14-0392), 2014-08-01
Supplement: 00085472can140392-sup-126768_1_supp_2522432_n76lg6.xlsx [file 00085472can140392-sup-126768_1_supp_2522432_n76lg6.xlsx]

## Sheet: Table S7A-Genes
Table S7A (related to Figure 7): Summary of genes with expresssion alteration, CNAs, somatic base substitutions and indels
Case ID	RNA expression alteration1			aCGH CNAs2					Coding sub.3	Mutation prob. FDR≤0.054	Indel5	Altered genes6
	Total	Overexpressed	Underexpressed	Total	Amplification	Amplification & Overexpressed	Deletion	Deletion & Underexpressed
406434	910	443	467	944	461	99	483	28	994	31	12	1764
76	1375	560	815	126	110	49	16	1	94	3	1	1453
5	273	31	242	185	69	0	116	3	3001	907	22	1450
159	425	174	251	647	398	5	249	15	108	0	2	1046
341400	580	472	108	653	187	20	466	4	-	-	-	1205
401188	457	213	244	260	101	37	159	25	-	-	-	655
115	265	34	231	12	3	0	9	0	-	-	-	277
32510	257	103	154	11	2	0	9	0	80	3	2	273
518	494	97	397	8	2	0	6	1	-	-	-	501
403802	613	150	463	0	0	-	0	-	-	-	-	613
401130	93	22	71	0	0	-	0	-	-	-	-	93
402421	611	182	429	0	0	-	0	-	-	-	-	611
1 From Table S3J and S3K.
2 From Table S2B and S2C.
3 From Table S3B.
4 From Table S3C.
5 From Table S3E.
6 Genes with expression altered, CNAs, significantly mutated, and/or indels.

## Sheet: Table S7B-HBC-genes
Table S7B (related to Figure 7): Alteration status1 of prominent human breast cancer genes listed in the TCGA publication*
ID	MYC	TP53	PIK3CA	PTEN	AKT1	GATA3	CDH1	RB1	MLL3	MAP3K1	CDKN1B	TBX3	RUNX1	CBFB	AFF2	PIK3R1	PTPN22	PTPRD	NF1	SF3B1	CCND3	BRCA1	SOX2	ID
406434	Amp & overexp	-	-	-	-	-	1 mutation	-	-	-	-	-	-	-	-	-	-	Del	1 mutation	-	-	-	-	406434
76	-	-	overexp	-	-	underexp	-	Overexp	-	-	-	-	-	-	-	-	-	-	-	-	Amp & Overexp	-	-	76
5	-	-	-	-	-	-	-	-	-	-	-	-	-	-	-	-	-	-	-	-	-	Mutation	-	5
159	-	-	-	-	-	-	Del	-	-	-	-	-	-	-	-	-	-	-	-	-	-	-	-	159
341400	-	-	-	-	-	Del	-	-	-	-	-	-	-	-	-	-	-	-	-	-	-	-	-	341400
401188	-	-	-	Del & underexp	-	-	-	-	-	-	-	Amp	-	-	-	Overexp	-	-	-	Overexp	-	-	-	401188
115	-	-	-	-	-	-	-	-	-	-	-	-	-	-	-	-	-	-	-	-	-	-	-	115
32510	-	-	-	-	-	-	-	-	-	-	-	-	-	-	-	-	-	-	-	-	-	-	-	32510
518	-	-	-	-	-	-	-	Amp	-	-	-	-	-	Overexp	-	-	-	Underexp	-	-	-	-	Expression	518
403802	-	-	-	-	-	-	-	-	-	Underexp	-	-	-	-	-	-	-	-	-	-	-	-	-	403802
401130	-	-	-	-	-	-	-	-	-	-	-	-	-	-	-	-	-	-	-	-	-	-	-	401130
402421	-	-	-	-	-	-	-	-	-	-	-	-	-	-	-	-	-	-	-	-	-	-	-	402421
1Amp/del (amplification or deletion) from Table S2B and S2C; over/underexp (over- or under-expression) from Table S3J and S3K; somatic mutation from Table S3B.
*Cancer Genome Atlas, N. (2012). Comprehensive molecular portraits of human breast tumours. Nature 490, 61-70.

## Sheet: Table S7C-aCGH-CNAs
Table S7C (related to Figure 7): Significantly enriched functions and pathways of amplified/deleted genes1 by DAVID*, p≤0.05
ID	Enriched Function Clusters	Enriched pathways
406434	Cell adhesion, regulation of secretion, skeletal system development, protein kinase activity	Sulfur metabolism, Endocytosis
76	Immunoglobulin domain, extracellular region part
5	Sterile alpha motif-type, CUB domain
159	Cell adhesion, protein kinase, ATP binding site, chromosome condensation	Regulation of actin cytoskeleton, Focal adhesion, Endocytosis
341400	Cytoskeletal protein binding, DNA damage response, signal transduction by p53 class mediator, chromatin organization, cell death, cell junction	Adherens junction, VEGF signaling pathway, Pathways in cancer, GnRH signaling pathway, Prion diseases, Inositol phosphate metabolism, Non-small cell lung cancer
401188	lipid catabolic process, cofactor metabolic process	Selenoamino acid metabolism
1Genes are listed Table S2B and S2C.
*Huang da W, Sherman BT, Lempicki RA: Systematic and integrative analysis of large gene lists using DAVID bioinformatics resources. Nat Protoc 2009, 4:44-57.

## Sheet: Table S7D-RNA-18-log-2sd
Table S7D (related to Figure 7): Significantly enriched functions and pathways of over/uder expressed genes1 by DAVID, p≤0.05
ID	Overexpressed genes: Enriched Function Clusters	Overexpressed Genes: Enriched pathways	Underexpressed genes: Enriched Function Clusters	Underexpressed Genes: Enriched pathways
406434	membrane-enclosed lumen, mitochondrion, ubiquitin-dependent protein catabolic process, macromolecular complex subunit organization, regulation of translation, ncRNA processing, mRNA binding, Ubiquitin-activating enzyme repeat, ubiquitin-dependent protein catabolic process, oxidation reduction, protein transport, mitotic cell cycle, acid-amino acid ligase activity, GTP binding	Pyrimidine metabolism, Purine metabolism, RNA polymerase, Oxidative phosphorylation, Huntington's disease, Alzheimer's disease, Protein export, Ubiquitin mediated proteolysis, Proteasome, Parkinson's disease, Amyotrophic lateral sclerosis (ALS)	cytoplasmic vesicle, endoplasmic reticulum, cell adhesion, regulation of immune effector process, lipid phosphate, protein kinase binding	Lysosome, Prostate cancer, Glycerophospholipid metabolism
76	endoplasmic reticulum, membrane-enclosed lumen, cytoplasmic vesicle, protein transport, unfolded protein binding, ncRNA metabolic process, RNA transport, protein kinase activity, glycoprotein metabolic process, ubl conjugation pathway, mitochondrion, Pathways in cancer	Pancreatic cancer, N-Glycan biosynthesis, Aminoacyl-tRNA biosynthesis, Prostate cancer, Glioma, Non-small cell lung cancer, Chronic myeloid leukemia, Pyrimidine metabolism, p53 signaling pathway, Melanoma, Pathways in cancer	glycoprotein, blood vessel development, extracellular matrix, cell morphogenesis, cell adhesion, cytoskeletal protein binding, regulation of protein kinase cascade, nerve development, regulation of phosphorylation	Endocytosis, Calcium signaling pathway, Vascular smooth muscle contraction
5	topological domain:Extracellular		mitochondrion, oxidation reduction, coenzyme binding, fatty acid metabolic process	Parkinson's disease, Alzheimer's disease, Oxidative phosphorylation, Huntington's disease
159	ncRNA processing, membrane-enclosed lumen	Chemokine signaling pathway, Primary immunodeficiency	regulation of cell death	Intestinal immune network for IgA production, beta-Alanine metabolism
341400	non-membrane-bounded organelle, cytoskeletal protein binding, sarcoplasmic reticulum, heart development, muscle organ development, cytoskeleton organization, RNA binding, anterior/posterior pattern formation	Cardiac muscle contraction, Hypertrophic cardiomyopathy (HCM), Dilated cardiomyopathy		MAPK signaling pathway
401188	membrane-enclosed lumen, apical part of cell, mitochondrial part, oxidation reduction, cofactor metabolic process	Citrate cycle (TCA cycle)	extracellular region, inflammatory response, leukocyte mediated immunity, plasma membrane, immune response, regulation of cell activation, hemostasis, lipid catabolic process	Asthma, Systemic lupus erythematosus, Allograft rejection, Graft-versus-host disease, Type I diabetes mellitus, Autoimmune thyroid disease, Viral myocarditis, Intestinal immune network for IgA production, Antigen processing and presentation, Cell adhesion molecules (CAMs), Natural killer cell mediated cytotoxicity
115	transmembrane region		skeletal system development, ATP binding
32510	cleavage on pair of basic residues		blood vessel development, extracellular region, tube development, regulation of cell proliferation, epithelium development, positive regulation of smooth muscle contraction, cell adhesion, regulation of cell growth	Complement and coagulation cascades, Hedgehog signaling pathway
518	extracellular region, regulation of response to external stimulus, cell adhesion	Axon guidance, Focal adhesion, ECM-receptor interaction	protein kinase binding, transmembrane region, neurological system process, immune response, cell membrane, Calcium signaling pathway	Calcium signaling pathway, Complement and coagulation cascades
403802	cell adhesion, oxidation reduction, monosaccharide metabolic process, sulfotransferase activity		domain:BTB, ubl conjugation pathway, regulation of cytokine production, endosome, cell cycle, chromosome, cell activation, Cytokine-cytokine receptor interaction, T cell activation, cell death, transcription regulation	T cell receptor signaling pathway, Tight junction, Primary immunodeficiency, Jak-STAT signaling pathway, Neurotrophin signaling pathway
401130			Sushi/SCR/CCP, cell membrane
402421	lysosome, glycoprotein, immune response, membrane fraction, innate immune response, endoplasmic reticulum, oxidoreductase activity, acting on NADH or NADPH, regulation of cytokine production, late endosome,	Lysosome, Glycosphingolipid biosynthesis, Other glycan degradation, Fc epsilon RI signaling pathway, Natural killer cell mediated cytotoxicity, Glycosaminoglycan degradation	membrane-enclosed lumen, DNA repair, cell cycle, transcription regulation, chromosome, DNA damage checkpoint, ncRNA processing, chromatin,	Homologous recombination, Cell cycle, Spliceosome, Pyrimidine metabolism
1Genes are listed in Table S3J and S3K.

## Sheet: Table S7E-aCGH+RNA-18-2sd
Table S7E (related to Figure 7): Significantly enriched functions and pathways of amplified/overexpressed or deleted/underexpressed genes1 by DAVID, p≤0.05
ID	Enriched Function Clusters	Enriched pathways
406434	cell adhesion, negative regulation of cytokine production, macromolecule catabolic process, regulation of translation
76	zinc-finger
5
159		Oxidative phosphorylation
341400
401188	membrane-enclosed lumen, lipid catabolic process, RNA processing, ubl conjugation pathway, mitochondrion
1Overlapping genes between Table S2B and S3J, and between Table S2C and S3K.

## Sheet: Table S7F-Somatic mutations
Table S7F (related to Figure 7): Significantly enriched functions and pathways of mutated genes1 by DAVID, p≤0.05
ID	Enriched Function Clusters	Enriched pathways
406434	regulation of transcription
5	Cell adhesion, DNA repair	ECM-receptor interaction, Ether lipid metabolism, ABC transporters, Glycerophospholipid metabolism, Olfactory transduction, Linoleic acid metabolism, Focal adhesion, Viral myocarditis, alpha-Linolenic acid metabolism
1Genes are listed in Table S3B.

## Sheet: Table S7G-Alter
Table S7G (related to Figure 7): Significantly enriched functions and pathways of altered genes1 by DAVID, p≤0.05
ID	Enriched Function Clusters	Enriched pathways
406434	cell adhesion, cytoplasmic vesicle, membrane-enclosed lumen, extracellular matrix, protein kinase activity, peptidyl-serine modification, protein transport, chordate embryonic development, transcription factor binding, phospholipid binding, transcription, DNA-dependent, germ cell migration, ligand-gated channel activity, skeletal system development, nuclease activity, tube development, diacylglyc…	Long-term potentiation, Glycerophospholipid metabolism, Lysosome, Pyrimidine metabolism, Prostate cancer, Endocytosis, RNA polymerase, Wnt signaling pathway
76	glycoprotein metabolic process, blood vessel development, endoplasmic reticulum lumen, cytoplasmic vesicle, protein kinase activity, protein transport, regulation of cytokine production, secretion, cell morphogenesis, regulation of cell division, carbohydrate binding, ErbB signaling pathway, regulation of cell cycle, positive regulation of signal transduction, response to hormone stimulus	Pancreatic cancer, Non-small cell lung cancer, Glioma, Melanoma, Small cell lung cancer, Endocytosis, Pathways in cancer, Prostate cancer, Aminoacyl-tRNA biosynthesis, Phosphatidylinositol signaling system, Renal cell carcinoma, O-Glycan biosynthesis
5	cell adhesion, ATP binding, extracellular matrix, intrinsic to membrane, zinc ion binding, microtubule motor activity, cellular component maintenance, actin binding, basement membrane, calmodulin binding, cellular component morphogenesis, response to inorganic substance, contractile fiber, calcium ion transport, mitochondrion, citrulline metabolic process	ECM-receptor interaction, Parkinson's disease, Ether lipid metabolism, alpha-Linolenic acid metabolism, Calcium signaling pathway
159	nuclear lumen, monovalent inorganic cation homeostasis, ATP binding, dephosphorylation, sexual reproduction, ARF guanyl-nucleotide exchange factor activity, SH3 domain binding, cytoskeleton organization, CARD domain binding, cell projection assembly	Alanine, aspartate and glutamate metabolism, beta-Alanine metabolism
341400	cytoskeletal protein binding, intracellular non-membrane-bounded organelle, striated muscle tissue development, chromosome, cytoskeleton organization, zinc ion binding, neuron projection, nuclear lumen, organophosphate metabolic process, secretion, ATP binding, transcription factor binding, fatty acid biosynthetic process, identical protein binding, chromatin binding	VEGF signaling pathway, Adherens junction, Long-term depression, Pathways in cancer, MAPK signaling pathway, Glycerophospholipid metabolism, GnRH signaling pathway, Fc epsilon RI signaling pathway, alpha-Linolenic acid metabolism, Wnt signaling pathway, Pancreatic cancer, Hypertrophic cardiomyopathy (HCM)
401188	carboxylic acid biosynthetic process, lipid catabolic process, cellular amino acid derivative metabolic process, fatty acid biosynthetic process, MHC protein complex, cofactor binding, positive regulation of transcription, DNA-dependent	Asthma, Allograft rejection, Systemic lupus erythematosus, Graft-versus-host disease, Type I diabetes mellitus, Chronic myeloid leukemia, Pathways in cancer, Autoimmune thyroid disease, Renal cell carcinoma
115
32510	blood vessel development, extracellular matrix, tube development, carbohydrate binding, enzyme inhibitor activity, regulation of system process, immune effector process, GTPase regulator activity, epithelium development, regulation of cell growth, skeletal system development, positive regulation of cell proliferation, response to organic substance, intrinsic to plasma membrane, response to bacter…	Hedgehog signaling pathway
518	regulation of system process, chemical homeostasis, extracellular region, cell activation, regulation of response to external stimulus, cell projection, secretion, identical protein binding, plasma membrane part, cell adhesion, positive regulation of response to stimulus, intrinsic to membrane, purine nucleotide metabolic process, response to endogenous stimulus	Calcium signaling pathway, Complement and coagulation cascades
403802	positive regulation of immune system process, endosome, macromolecule catabolic process, regulation of apoptosis, regulation of gene-specific transcription, cell activation, cytokine binding, regulation of cytokine biosynthetic process, regulation of T cell activation,	T cell receptor signaling pathway, Fatty acid elongation in mitochondria
401130	hormone activity, neurological system process, gland development
402421	vacuole, DNA repair, membrane-enclosed lumen, cell cycle, scavenger receptor activity, chromosome, vesicle-mediated transport, double-strand break repair, oxidoreductase activity, acting on NADH or NADPH, immune effector process, vesicle, regulation of cell cycle, carboxypeptidase activity, peptidase activity	Lysosome, Glycosphingolipid biosynthesis, Other glycan degradation
1Genes with expression altered, CNAs, significantly mutated, and/or indels; see column M of Table S7A
